# Supplementary material for: Role of MNX1-mediated histone modifications and PBX gene family in MNX1-induced leukemogenesis
Source: Sci Rep. 2026 Jan 19;16:2593. doi: 10.1038/s41598-026-36367-8 (PMC12820052; doi:10.1038/s41598-026-36367-8)
Supplement: Supplementary file 4 — Supplementary Material 4 [file 41598_2026_36367_MOESM4_ESM.xlsx]

## Sheet: MAST_PBX1_ATAC
Region	Start position of subregion relative to sequnces length	Sequence of subregion of containg motif match	Start position of motif match relative to sequnces length	Motif Index	Reverse complement	pvalue	Match pattern
chr12:85824532-85825122	1	AGCTCCGGTCCCAAGTCCACCTGGGCCACTTGTTCCCGCCCCCTCCCTCAGCCCAGCTCCAGGATTGGGTTGTTT	35	2	n	9.2e-08	+++++++++++
chr12:85824532-85825122	76	TTGTCAGTCCTCGTTCTGATTGGCTACGCTGGCTCAGTTCGAGCAGGCGATAGGGAGTGAACTCCTTTGCTGCCA ATCAGCAGTTGCCGCCGCCTGAGCCTCTTCCTGCTACGCCGCTCACGCGGTAAACCCTTCTGTCGAGCGTGGCGG	88	1	y	7.6e-09	++++++++++++++
chr12:85824532-85825122	76	TTGTCAGTCCTCGTTCTGATTGGCTACGCTGGCTCAGTTCGAGCAGGCGATAGGGAGTGAACTCCTTTGCTGCCA ATCAGCAGTTGCCGCCGCCTGAGCCTCTTCCTGCTACGCCGCTCACGCGGTAAACCCTTCTGTCGAGCGTGGCGG	145	3	n	6e-06	+++ ++++++
chr12:85824532-85825122	226	AACTCTGAGTTTGGAGTCAGTCTTTTAGGGGTGGGGAAAACGCAGAGAGAAAAAGGAGCCAAGAAACCTTCTGGT	250	2	y	4.2e-05	++++ +++
chr12:85824532-85825122	451	GCAGCCTTCGGCGGCTGCGTTGATTCGGGCTGGGGAAGGAGGAGGGAGGTGAAGCAGAGCGTGGTCCCCGCCTGC CGGCCCCGAGCCGTGAGAAGATGAGACAGGTAAACGCCTGCGCCGGCGCGCTCCGGGGAGGTGCG	517	2	n	8.1e-05	++++++ ++
chr8:57511572-57512079	1	CTCTCGGGGCCTGCCCCACCCTCATGGCCAATCAGCAGCGGGCCCGCCATTTTTCAAACGCTTTTCCTGCCGCCA ATCAGGGCCGAGCAGTACATTCCTCTCTAGACCGGTTCCAACGGGTCTGGGAGTTAACGACCTGGGAGACCCACC	25	1	n	1.1e-06	+++++++++++ ++
chr8:57511572-57512079	1	CTCTCGGGGCCTGCCCCACCCTCATGGCCAATCAGCAGCGGGCCCGCCATTTTTCAAACGCTTTTCCTGCCGCCA ATCAGGGCCGAGCAGTACATTCCTCTCTAGACCGGTTCCAACGGGTCTGGGAGTTAACGACCTGGGAGACCCACC	70	1	n	7.5e-06	+ +++++++++ ++
chr8:57511572-57512079	151	GAACCTGCTAGGCTTAGCCTGGAGGGACGGGCCTGGCCAGACACCCACCAATCGGAAGCCTTCTCCGTGGGGGGG CGGGGACTCTCCGGGTTTGAATAATCCTCCACAGCCAATCAGAGCGGAGGGAGGTGTGGCCCGCGACTGGTCTGG	195	1	n	2.1e-05	+ ++++++++++++
chr8:57511572-57512079	151	GAACCTGCTAGGCTTAGCCTGGAGGGACGGGCCTGGCCAGACACCCACCAATCGGAAGCCTTCTCCGTGGGGGGG CGGGGACTCTCCGGGTTTGAATAATCCTCCACAGCCAATCAGAGCGGAGGGAGGTGTGGCCCGCGACTGGTCTGG	219	2	y	1.7e-07	+++++++++++
chr8:57511572-57512079	151	GAACCTGCTAGGCTTAGCCTGGAGGGACGGGCCTGGCCAGACACCCACCAATCGGAAGCCTTCTCCGTGGGGGGG CGGGGACTCTCCGGGTTTGAATAATCCTCCACAGCCAATCAGAGCGGAGGGAGGTGTGGCCCGCGACTGGTCTGG	257	1	n	1.4e-08	++++++++++++++
chr4:44704479-44704751	1	TGCGTGTGGACAGCGCCGCCCGGGGCTCAGCCTCCCTCCGGGCGGGGGCGGGGCGAGAGCTCACCTGCCAATCAT	42	2	y	4.1e-07	+ +++++++++
chr4:44704479-44704751	1	TGCGTGTGGACAGCGCCGCCCGGGGCTCAGCCTCCCTCCGGGCGGGGGCGGGGCGAGAGCTCACCTGCCAATCAT	65	3	n	6e-06	+++ ++++++
chr4:44704479-44704751	76	GCCCCATCAAGCCAATCAGAACAGGGGCATCCGGCCCTAGCCCGATATACTGCCCTATTGGCTAAGCAACCCACG	84	1	n	2.4e-07	+++++++++++++
chr4:44704479-44704751	151	GGCTCCGCCTGATTAGCCGGTACCTGGGCAATGGGAGAGAATGGGGGGCGGGGCCCAAGCTGCGGCGCCACGTTC	192	2	y	9.3e-07	++++++++++
chr7:41632941-41633716	76	CCCTCAGAGGCAAAGCAGAACACTGAGCACCGCCTGCAGGGAAGACCCGCCTCCTATCCGTGCTTTCTGAGGGAA	121	2	n	3.8e-06	++++++ +++
chr7:41632941-41633716	151	CTGCATGTCCCGATGCTTTGATTGGCTAAAGAGGCGTGAGTGACAGACGTTCCCTTTGATGGAAAGGAGAGCTAA	165	1	y	8.5e-08	+++ ++++++++++
chr7:41632941-41633716	151	CTGCATGTCCCGATGCTTTGATTGGCTAAAGAGGCGTGAGTGACAGACGTTCCCTTTGATGGAAAGGAGAGCTAA	187	3	y	2e-06	+++ ++++++
chr7:41632941-41633716	526	GCTTAAGGATGCTATCACTCAAACATTGCTAGCCAATCAGAGCTTCCAAGTAGGCAGTCCAATCGAGTGCCAGCG GGAGGCGGGATTTCTTGGCCGCCATGCCACCTTCCAAGCTCTAAGACTGAGGTAGTCGCGTTGGAGACGTTGCTC	537	3	n	1.7e-05	++ +++ +++
chr7:41632941-41633716	526	GCTTAAGGATGCTATCACTCAAACATTGCTAGCCAATCAGAGCTTCCAAGTAGGCAGTCCAATCGAGTGCCAGCG GGAGGCGGGATTTCTTGGCCGCCATGCCACCTTCCAAGCTCTAAGACTGAGGTAGTCGCGTTGGAGACGTTGCTC	555	1	n	3.4e-09	++++++++++++++
chr7:41632941-41633716	526	GCTTAAGGATGCTATCACTCAAACATTGCTAGCCAATCAGAGCTTCCAAGTAGGCAGTCCAATCGAGTGCCAGCG GGAGGCGGGATTTCTTGGCCGCCATGCCACCTTCCAAGCTCTAAGACTGAGGTAGTCGCGTTGGAGACGTTGCTC	599	2	y	3.3e-06	+++ ++++++
chr10:81648942-81649228	1	AGTCCCTGAGGGCTACTCTGTCCCTAAGGAAGATGCTCCTGTCACTCAGGCCTCATTAGCCAATCAGAGTCTCGA	39	3	n	2e-06	++++++ +++
chr10:81648942-81649228	1	AGTCCCTGAGGGCTACTCTGTCCCTAAGGAAGATGCTCCTGTCACTCAGGCCTCATTAGCCAATCAGAGTCTCGA	57	1	n	6.1e-08	+++++++++++++
chr10:81648942-81649228	76	GGCAGCTGAGTGGAGGCGGGAACTTCCGGTCCGCCATTCTCAGGTTTGACTGCGAGTCTGAGGGAAGCTCTAGTG	85	2	y	4.7e-06	+ ++ ++++++
chr8:46152489-46152615	1	CTGAGTGACAGTggggcggggtcgccccgcccacccggggcgggggcggccggAAAGGGGCGCGACCAATCGCAG TGGACCCCGCTACTTCCCGAgccccgcccccgccccccggggACCGCGTCT	2	3	y	2e-06	+++ ++++++
chr8:46152489-46152615	1	CTGAGTGACAGTggggcggggtcgccccgcccacccggggcgggggcggccggAAAGGGGCGCGACCAATCGCAG TGGACCCCGCTACTTCCCGAgccccgcccccgccccccggggACCGCGTCT	26	2	n	2.5e-06	+++++++ +++
chr8:46152489-46152615	1	CTGAGTGACAGTggggcggggtcgccccgcccacccggggcgggggcggccggAAAGGGGCGCGACCAATCGCAG TGGACCCCGCTACTTCCCGAgccccgcccccgccccccggggACCGCGTCT	63	1	n	1.9e-05	++++++++++ ++
chr8:46152489-46152615	1	CTGAGTGACAGTggggcggggtcgccccgcccacccggggcgggggcggccggAAAGGGGCGCGACCAATCGCAG TGGACCCCGCTACTTCCCGAgccccgcccccgccccccggggACCGCGTCT	98	2	n	4.1e-07	+++++++++ +
chr8:129263541-129263762	1	TACTGGCCAATCAGAGCCTTTAGGCGGACCTGCCAGTCAGAAGAGAAGGCGGGTTTTCCGGGTGCCGTGGTGCCG	4	1	n	2.1e-08	++++++++++++++
chr8:129263541-129263762	1	TACTGGCCAATCAGAGCCTTTAGGCGGACCTGCCAGTCAGAAGAGAAGGCGGGTTTTCCGGGTGCCGTGGTGCCG	30	3	n	2.4e-05	+++ ++ +++
chr8:129263541-129263762	1	TACTGGCCAATCAGAGCCTTTAGGCGGACCTGCCAGTCAGAAGAGAAGGCGGGTTTTCCGGGTGCCGTGGTGCCG	43	2	y	7.7e-06	+++ ++++++
chr11:87108752-87109387	1	TCTACAGGGTTCGTTGTCTTGAAAGGATCAAAGCACAGCTTGGACTACGATTGGCCAAAAGAGCATCACATCCTG GCCAATCGGAACTGAGGCGCTTCTTGTATGAATAAGGAAAGGCGGGCGAGAAGGGGCGGGGAAGCCGGAGAGAAA	44	1	y	1.8e-05	++ ++++++++++
chr11:87108752-87109387	1	TCTACAGGGTTCGTTGTCTTGAAAGGATCAAAGCACAGCTTGGACTACGATTGGCCAAAAGAGCATCACATCCTG GCCAATCGGAACTGAGGCGCTTCTTGTATGAATAAGGAAAGGCGGGCGAGAAGGGGCGGGGAAGCCGGAGAGAAA	74	1	n	2.8e-07	++++++++++++++
chr11:87108752-87109387	1	TCTACAGGGTTCGTTGTCTTGAAAGGATCAAAGCACAGCTTGGACTACGATTGGCCAAAAGAGCATCACATCCTG GCCAATCGGAACTGAGGCGCTTCTTGTATGAATAAGGAAAGGCGGGCGAGAAGGGGCGGGGAAGCCGGAGAGAAA	111	2	y	2.6e-05	++ ++++++
chr11:87108752-87109387	1	TCTACAGGGTTCGTTGTCTTGAAAGGATCAAAGCACAGCTTGGACTACGATTGGCCAAAAGAGCATCACATCCTG GCCAATCGGAACTGAGGCGCTTCTTGTATGAATAAGGAAAGGCGGGCGAGAAGGGGCGGGGAAGCCGGAGAGAAA	125	2	y	9.3e-07	++ ++++++++
chr11:87108752-87109387	151	AGGAGGTGTGTCACGTCGCCTAGGCCCGCAGTGGAAGCTTTTATGTCATTGGCTGCTGCTGCTTCCGAGTACACC	192	1	y	2.6e-05	+ + ++++++++
chr11:87108752-87109387	226	AATCGCAAACTCTTTTCCAAGTATGAACTTGAAAGTAGGGACCATAAGGCAGCCAATGGAAAAATTCATATATTC	275	1	n	1.4e-05	++++++++ + ++
chr11:87108752-87109387	376	AGGCGCCAATGGGCGGGCGCCGATGGAACGTACTAGCCAATGAGCGCAAGACGTTGAGTGACAGCTGTCCAATGG AGGGCCTCAGTGCTAGCACGGCTTACAGCTTAAGCGCCTCAGCGGTCTGAGGAATGTCAACTATTCAATATGGAG	382	2	y	1.5e-05	+ +++++++
chr11:87108752-87109387	376	AGGCGCCAATGGGCGGGCGCCGATGGAACGTACTAGCCAATGAGCGCAAGACGTTGAGTGACAGCTGTCCAATGG AGGGCCTCAGTGCTAGCACGGCTTACAGCTTAAGCGCCTCAGCGGTCTGAGGAATGTCAACTATTCAATATGGAG	409	1	n	4.8e-07	++++++++ ++ ++
chr11:87108752-87109387	376	AGGCGCCAATGGGCGGGCGCCGATGGAACGTACTAGCCAATGAGCGCAAGACGTTGAGTGACAGCTGTCCAATGG AGGGCCTCAGTGCTAGCACGGCTTACAGCTTAAGCGCCTCAGCGGTCTGAGGAATGTCAACTATTCAATATGGAG	430	3	y	2e-06	+++ ++++++
chr11:87108752-87109387	376	AGGCGCCAATGGGCGGGCGCCGATGGAACGTACTAGCCAATGAGCGCAAGACGTTGAGTGACAGCTGTCCAATGG AGGGCCTCAGTGCTAGCACGGCTTACAGCTTAAGCGCCTCAGCGGTCTGAGGAATGTCAACTATTCAATATGGAG	441	1	n	8.1e-05	++ +++++ + ++
chr5:73490727-73491203	1	CGGTTGGTCTCCCGCTCCAGGATCCGCCCGCCACAGGGCGGGGCTTCAGGGTCAAGGTGGACCAATTCCCCAGTC	32	2	y	3.2e-05	+ +++++++
chr5:73490727-73491203	76	TCGCCCCTCCACGCGCTTTCGGACCCCTGAATGACTGACAGCCGTTGGGTCCAACCTGCGGCTCCGAACAGTGGC	107	3	y	2.9e-06	+++ ++++++
chr5:73490727-73491203	151	CTCCACCAGGGGCGGTCGGAGGCGAGACGCCGGGGCCAATCACGTTGCAGTCTAGGGGGCGGGGCCTCCTTGCCA	183	1	n	9e-05	+++++++++
chr5:73490727-73491203	151	CTCCACCAGGGGCGGTCGGAGGCGAGACGCCGGGGCCAATCACGTTGCAGTCTAGGGGGCGGGGCCTCCTTGCCA	203	2	y	5.2e-07	++++++++++
chr5:73490727-73491203	226	GCTGCAGGCGGCGCAACCAGCACTTCTTCGGTCAAATGAGAGCCGAAGAGGGGCGGTCCCCCGGCTGGGGTCTAG CCAATGAGAAGGGCGGGATGGGCGGGCCGGAGAAGAAGCCGGCGGTCCTCTGTTGCGAGCTAAGGTTTGGGGAGT	298	1	n	2.8e-07	++++++++ +++++
chr5:73490727-73491203	226	GCTGCAGGCGGCGCAACCAGCACTTCTTCGGTCAAATGAGAGCCGAAGAGGGGCGGTCCCCCGGCTGGGGTCTAG CCAATGAGAAGGGCGGGATGGGCGGGCCGGAGAAGAAGCCGGCGGTCCTCTGTTGCGAGCTAAGGTTTGGGGAGT	316	2	y	1e-05	++ +++++++
chr5:73490727-73491203	376	CGGTAGGGGGACCGCGAGTGGAGCGCGGGAGCCCGGGCGGCAGGCGGGTGTGAGCTGCCCGAAAATGCACTCGGA	413	2	y	8.1e-05	++ ++++++
chr9:4376281-4376668	1	AAGACTGTCTCTAGGGACCAATCCTTTGCTAGAGGACGCTTGATTGACAGGGTCACGTGGCAAAAAGTGAGCGCT	41	3	y	1.1e-06	++++++++++
chr9:4376281-4376668	151	TGAGGCCTGGCCTGAGGCGGGCTCTAAGGCAGAGTGGCAATTCCCCCTGGACAAATGGATTAGCTGCAACCCATG	161	2	y	4.5e-05	+ ++++++
chr9:4376281-4376668	226	AGCAACAGCCATCTCAGCCAATCGGAGCAGGCAGAAGTTGGTGGGCGGGGACTCCATGAAGCATCTCTTTTCCAG	240	1	n	1e-07	++++++++++++++
chr9:4376281-4376668	226	AGCAACAGCCATCTCAGCCAATCGGAGCAGGCAGAAGTTGGTGGGCGGGGACTCCATGAAGCATCTCTTTTCCAG	264	2	y	8.5e-06	++ +++++++
chr5:109845003-109845237	1	AAGGGACCTTTCAAGCCTGCTCAGCTACTAAGCGAAACCGACCCAAGGTATCCGGAAAAACCCGCCTTCCCTTCT GACTGGCAGGTCCCCCTAGAGGCTCTGATTGGCCAGTAAGTCTTGAGTGACTCGAGCACCTCCCTTAGGGTTAGG	61	2	n	9.5e-06	++++++ +++
chr5:109845003-109845237	1	AAGGGACCTTTCAAGCCTGCTCAGCTACTAAGCGAAACCGACCCAAGGTATCCGGAAAAACCCGCCTTCCCTTCT GACTGGCAGGTCCCCCTAGAGGCTCTGATTGGCCAGTAAGTCTTGAGTGACTCGAGCACCTCCCTTAGGGTTAGG	75	3	y	2.4e-05	+++ ++ +++
chr5:109845003-109845237	1	AAGGGACCTTTCAAGCCTGCTCAGCTACTAAGCGAAACCGACCCAAGGTATCCGGAAAAACCCGCCTTCCCTTCT GACTGGCAGGTCCCCCTAGAGGCTCTGATTGGCCAGTAAGTCTTGAGTGACTCGAGCACCTCCCTTAGGGTTAGG	97	1	y	2.1e-08	++++++++++++++
chr8:76901996-76902271	1	TGCGGCTTTAAGGAAGCTGCGGAGTCCAGGCTGTGTCGCAGCAACTTTGTATCAGTCATGTCGCCCGCCTGGTGA CTGACAGCCCCTGTTGCCCAATGAGAAGCGCGCCTGGCCCGCACAGCGTGGAGCCTTGTTTCCCCCTTGGCCAAT GGAAATGGCTCCAGCGGGCGGGACAGCGACCTGAACTTTCTGGACATGTGACCCGGTTTAAAAGGGCCGGCTTTC	73	3	y	2.9e-06	+++ ++++++
chr8:76901996-76902271	1	TGCGGCTTTAAGGAAGCTGCGGAGTCCAGGCTGTGTCGCAGCAACTTTGTATCAGTCATGTCGCCCGCCTGGTGA CTGACAGCCCCTGTTGCCCAATGAGAAGCGCGCCTGGCCCGCACAGCGTGGAGCCTTGTTTCCCCCTTGGCCAAT GGAAATGGCTCCAGCGGGCGGGACAGCGACCTGAACTTTCTGGACATGTGACCCGGTTTAAAAGGGCCGGCTTTC	90	1	n	2.3e-05	++ +++++ +++++
chr8:76901996-76902271	1	TGCGGCTTTAAGGAAGCTGCGGAGTCCAGGCTGTGTCGCAGCAACTTTGTATCAGTCATGTCGCCCGCCTGGTGA CTGACAGCCCCTGTTGCCCAATGAGAAGCGCGCCTGGCCCGCACAGCGTGGAGCCTTGTTTCCCCCTTGGCCAAT GGAAATGGCTCCAGCGGGCGGGACAGCGACCTGAACTTTCTGGACATGTGACCCGGTTTAAAAGGGCCGGCTTTC	143	1	n	1.9e-05	++++++++ + ++
chr8:76901996-76902271	1	TGCGGCTTTAAGGAAGCTGCGGAGTCCAGGCTGTGTCGCAGCAACTTTGTATCAGTCATGTCGCCCGCCTGGTGA CTGACAGCCCCTGTTGCCCAATGAGAAGCGCGCCTGGCCCGCACAGCGTGGAGCCTTGTTTCCCCCTTGGCCAAT GGAAATGGCTCCAGCGGGCGGGACAGCGACCTGAACTTTCTGGACATGTGACCCGGTTTAAAAGGGCCGGCTTTC	162	2	y	3.9e-05	++ +++++++
chr8:76901996-76902271	226	CACTCCCCCCTCGGGGCTTTCGCCCGCCCCCTCCTCTTGGCCCGCCCCGG	248	2	n	9.2e-08	+++++++++++
chr11:64978825-64979217	1	CGCTTCCGCCAAGTGACAGTAACCGGAAAACGTCAACAGGGAAAGCCGGAACCGGTGAGGGGGGCGGGGCCTCCG	58	2	y	1.1e-06	++++++++++
chr11:64978825-64979217	76	GCGACGCTCTAGCTTTCGCTTACTCTACGTCCACCTTGATTGACAGACTCCGAGCTCCAAGGCTCGTTACGATTG GATGCGGAGCTTTGGATGGGCGGGCAGCTAGCGCGGCGGCGCGCTGATTGGTCAGTTCCGCCATGCGGTGGAGGG	112	3	y	1.1e-06	++++++++++
chr11:64978825-64979217	76	GCGACGCTCTAGCTTTCGCTTACTCTACGTCCACCTTGATTGACAGACTCCGAGCTCCAAGGCTCGTTACGATTG GATGCGGAGCTTTGGATGGGCGGGCAGCTAGCGCGGCGGCGCGCTGATTGGTCAGTTCCGCCATGCGGTGGAGGG	141	1	y	3.5e-05	+++ +++++++ ++
chr11:64978825-64979217	76	GCGACGCTCTAGCTTTCGCTTACTCTACGTCCACCTTGATTGACAGACTCCGAGCTCCAAGGCTCGTTACGATTG GATGCGGAGCTTTGGATGGGCGGGCAGCTAGCGCGGCGGCGCGCTGATTGGTCAGTTCCGCCATGCGGTGGAGGG	164	2	y	1e-05	++ +++++++
chr11:64978825-64979217	76	GCGACGCTCTAGCTTTCGCTTACTCTACGTCCACCTTGATTGACAGACTCCGAGCTCCAAGGCTCGTTACGATTG GATGCGGAGCTTTGGATGGGCGGGCAGCTAGCGCGGCGGCGCGCTGATTGGTCAGTTCCGCCATGCGGTGGAGGG	191	1	y	9.6e-07	++ +++++++++++
chr5:109996408-109996660	1	CACCCTAACCCTAAAGGAGGTGCTCGAGTCACTCAAGACTTACTGGCCAATCAGAGCCTCTACGCGGACCTGCCA GTCAGAGGGGAAGGCGGGTTTTCCGGATACCTTGGGCCGGTTTCCCTTAGTAGCTGAGCAGGCTTGAATGGTCCC	44	1	n	2.1e-08	++++++++++++++
chr5:109996408-109996660	1	CACCCTAACCCTAAAGGAGGTGCTCGAGTCACTCAAGACTTACTGGCCAATCAGAGCCTCTACGCGGACCTGCCA GTCAGAGGGGAAGGCGGGTTTTCCGGATACCTTGGGCCGGTTTCCCTTAGTAGCTGAGCAGGCTTGAATGGTCCC	70	3	n	2.4e-05	+++ ++ +++
chr5:109996408-109996660	1	CACCCTAACCCTAAAGGAGGTGCTCGAGTCACTCAAGACTTACTGGCCAATCAGAGCCTCTACGCGGACCTGCCA GTCAGAGGGGAAGGCGGGTTTTCCGGATACCTTGGGCCGGTTTCCCTTAGTAGCTGAGCAGGCTTGAATGGTCCC	83	2	y	9.5e-06	+++ ++++++
chr19:46152242-46152686	1	TAAACAGCGCACTGCAACCGAACCCTATCTGACCCCACCTCTTCAACCGCCCAGCACAATTTTTCATTGTTTATT GGCTTCTGTAACTGTCAGTCAGAGAATCCTCGTATCCGTTGGCTGTCCCCTACCTACTCTTCTTTCCCTTGTAAT	34	2	n	2.6e-05	+++ ++ + ++
chr19:46152242-46152686	1	TAAACAGCGCACTGCAACCGAACCCTATCTGACCCCACCTCTTCAACCGCCCAGCACAATTTTTCATTGTTTATT GGCTTCTGTAACTGTCAGTCAGAGAATCCTCGTATCCGTTGGCTGTCCCCTACCTACTCTTCTTTCCCTTGTAAT	67	1	y	5.5e-05	+ + +++++++
chr19:46152242-46152686	1	TAAACAGCGCACTGCAACCGAACCCTATCTGACCCCACCTCTTCAACCGCCCAGCACAATTTTTCATTGTTTATT GGCTTCTGTAACTGTCAGTCAGAGAATCCTCGTATCCGTTGGCTGTCCCCTACCTACTCTTCTTTCCCTTGTAAT	87	3	n	2.9e-06	++++++ +++
chr19:46152242-46152686	151	CTGGTCTCTTTGGGCATTGCACGCCTCCCAGAGCTAATTTCTTTCTTCGATTGGATAGTCGGAATGCCACTTTTC	194	1	y	1.5e-05	++ +++++++ ++
chr19:46152242-46152686	226	AGAGTGCCACGCTCTGATTGGCTGAGCGCGGCAGGACTCTCGCAGTTACCAGGCAGCGGGCTAGACTGAGGCTAG	236	1	y	1.4e-08	++++++++++++++
chr2:150311347-150311591	1	AAAGGTGGTGCTTATGTTACTCATACACACTAGCCAATCAGCACATGGAGGCGGTCCTGCCAATCAGAGGAGAAG GCGGGCTTTTCCGGGAGCTTTCCTGCAAGTTCCTCTCCAAAGCGGAGCAATCCGGTGTGTTTCAGTTTGTTGTGG	31	1	n	1.2e-07	+++++++++++ ++
chr2:150311347-150311591	1	AAAGGTGGTGCTTATGTTACTCATACACACTAGCCAATCAGCACATGGAGGCGGTCCTGCCAATCAGAGGAGAAG GCGGGCTTTTCCGGGAGCTTTCCTGCAAGTTCCTCTCCAAAGCGGAGCAATCCGGTGTGTTTCAGTTTGTTGTGG	57	3	n	6e-06	+++ ++++++
chr2:150311347-150311591	1	AAAGGTGGTGCTTATGTTACTCATACACACTAGCCAATCAGCACATGGAGGCGGTCCTGCCAATCAGAGGAGAAG GCGGGCTTTTCCGGGAGCTTTCCTGCAAGTTCCTCTCCAAAGCGGAGCAATCCGGTGTGTTTCAGTTTGTTGTGG	70	2	y	7.7e-06	+++ ++++++
chr8:69749613-69750194	1	ACAACACAAAAACCACTTCGTGGCCGTGACGTCACCGACACGGAGGGCGGGGCCTCCCCTGCGGCGCCCTGAGCT	41	2	y	4.7e-06	++ +++++++
chr8:69749613-69750194	376	TGGTGTAAGCTTGAAGGCCCTGATTGGCTAGGTCCGCCCAGCGACTGCTGATTGACAGCAGGAGCTGAAGTGATG	392	1	y	8.5e-08	++ +++++++++++
chr8:69749613-69750194	376	TGGTGTAAGCTTGAAGGCCCTGATTGGCTAGGTCCGCCCAGCGACTGCTGATTGACAGCAGGAGCTGAAGTGATG	424	3	y	1.1e-06	++++++++++
chr9:21760276-21760721	1	ATGACTGATCGCGCCGAGTCCGAACCCGCGCAAATTCGTCTCACCACGGGCCCCGCCCCCTCCCCAGAGCGCATA	52	2	n	9.2e-08	+++++++++++
chr9:21760276-21760721	151	CGGCCATTTTGTGGAGATCCTGTGCGAAATTTCTTCTGTCACTCAGGTGTGAGGATCAATCATCGTAggcggggg	186	3	n	2e-06	++++++ +++
chr9:21760276-21760721	151	CGGCCATTTTGTGGAGATCCTGTGCGAAATTTCTTCTGTCACTCAGGTGTGAGGATCAATCATCGTAggcggggg	213	2	y	3.9e-05	+ ++++++
chr9:21760276-21760721	226	aggggggggggcggcggcgcggggggggggcgTGTCACACGTGGCCAGTTTGCGATTGGCCTGGTACGCGTGCGT	249	2	y	3.9e-05	+++++++++ +
chr9:21760276-21760721	226	aggggggggggcggcggcgcggggggggggcgTGTCACACGTGGCCAGTTTGCGATTGGCCTGGTACGCGTGCGT	274	1	y	2.5e-05	++ +++++++++
chr5:100572248-100572387	1	GGGGTAGGGGTGGGCTGGAGTACAAAGAGCAATGTCCTGTGCTCTGATTGGCTGTGGTAATCCAGGCACCAAAAG	4	2	y	2.2e-05	+ ++++ +++
chr5:100572248-100572387	1	GGGGTAGGGGTGGGCTGGAGTACAAAGAGCAATGTCCTGTGCTCTGATTGGCTGTGGTAATCCAGGCACCAAAAG	41	1	y	1.4e-08	++++++++++++++
chr15:99392756-99393151	1	AAGAAGGCGGAGGCCTATTGCTAAGGTGCGGGTTGGTGGCTACAGTCTTGATTGACAGGGGTATTAGCCAATGAC	49	3	y	1.1e-06	++++++++++
chr15:99392756-99393151	76	TCTGACGAAAGCGGCTGCTGTTTATGAACGTGCAGATAACGGACAGGAGCAGTGCAGCCGGGGGCCAATGAGAAC	137	1	n	3.4e-06	+++++++ +++++
chr15:99392756-99393151	151	TCGCCTGGGCAGGTCTGAGGGCGGGGTTTCCCTAGGGGGCGGGTGTGGGTAGACTTCCAGCGCCAACCCCCGGAG	165	2	y	1.1e-05	+ +++++++
chr15:99392756-99393151	151	TCGCCTGGGCAGGTCTGAGGGCGGGGTTTCCCTAGGGGGCGGGTGTGGGTAGACTTCCAGCGCCAACCCCCGGAG	183	2	y	5.2e-07	++++++++++
chr15:99392756-99393151	226	ACTCAGAGCACATCCGGTTTTAGCAGAGCAGGGAAGCTCCGGAGAGGTGGGCTGAGAAGGTACGTGCGAAACTAG	266	2	y	3e-05	++ + ++ +++
chr2:118901247-118901590	1	TGCCCCCTGCGTCGGGACGACCGACCCACGATTCTGATTGGTTGGAGACCGGGAGGGGGAGCCGAGGGCCGGATT	31	1	y	1.1e-06	+++++++++++++
chr2:118901247-118901590	76	GGCTGGCGGGGCCAGCGCAGGGCGGGGCGGCTGATTGGCGGAGCTTGCCGAGGGGCGCGCCGCTGATTGGCTGAG	91	2	y	3.7e-05	+ +++++++
chr2:118901247-118901590	76	GGCTGGCGGGGCCAGCGCAGGGCGGGGCGGCTGATTGGCGGAGCTTGCCGAGGGGCGCGCCGCTGATTGGCTGAG	107	3	y	3.3e-05	++++++ + +
chr2:118901247-118901590	76	GGCTGGCGGGGCCAGCGCAGGGCGGGGCGGCTGATTGGCGGAGCTTGCCGAGGGGCGCGCCGCTGATTGGCTGAG	135	1	y	4.8e-07	++ +++++++++++
chr2:118901247-118901590	226	GGATCCCGGAgcccggcccccgctgctcgcccgtccggccgcctgccccgcccgtccggccctagccgtccgccc gccccggccaggcgcgcccgccccccccgacggccccgcccga	272	2	n	5.9e-05	+++++++ ++
chr2:118901247-118901590	226	GGATCCCGGAgcccggcccccgctgctcgcccgtccggccgcctgccccgcccgtccggccctagccgtccgccc gccccggccaggcgcgcccgccccccccgacggccccgcccga	298	2	n	1.1e-05	++++++++ +
chr2:118901247-118901590	226	GGATCCCGGAgcccggcccccgctgctcgcccgtccggccgcctgccccgcccgtccggccctagccgtccgccc gccccggccaggcgcgcccgccccccccgacggccccgcccga	317	2	n	1.7e-07	+++++++++++
chr2:174464035-174464369	1	GCTTCAGAGTAGCCTCAAACCGGCCCGGCAGCAGGAAGGTCAGGCCTGAGTAGCGGAAGGGGTGGGGTACGCGGA	56	2	y	8.5e-06	++ ++++ +++
chr2:174464035-174464369	76	CCTGCCAGTCAGCGCCTCATCCCGCCCTTGCCAACCAGGAGCCAATAGGAGCGCCGGTCGCGCCTTGCCCATTGG CCGAGCGGCTACCGGAAGCTGTGGCCGTAGAGACACCTGGGAAAGCGAGGCCGCTGCATGCCGGTCACCTTCCAG	77	3	n	2.4e-05	+++ ++ +++
chr2:174464035-174464369	76	CCTGCCAGTCAGCGCCTCATCCCGCCCTTGCCAACCAGGAGCCAATAGGAGCGCCGGTCGCGCCTTGCCCATTGG CCGAGCGGCTACCGGAAGCTGTGGCCGTAGAGACACCTGGGAAAGCGAGGCCGCTGCATGCCGGTCACCTTCCAG	96	2	n	1.5e-05	+++++++ +
chr2:174464035-174464369	76	CCTGCCAGTCAGCGCCTCATCCCGCCCTTGCCAACCAGGAGCCAATAGGAGCGCCGGTCGCGCCTTGCCCATTGG CCGAGCGGCTACCGGAAGCTGTGGCCGTAGAGACACCTGGGAAAGCGAGGCCGCTGCATGCCGGTCACCTTCCAG	114	1	n	6.1e-06	+++++++ +++++
chr2:174464035-174464369	76	CCTGCCAGTCAGCGCCTCATCCCGCCCTTGCCAACCAGGAGCCAATAGGAGCGCCGGTCGCGCCTTGCCCATTGG CCGAGCGGCTACCGGAAGCTGTGGCCGTAGAGACACCTGGGAAAGCGAGGCCGCTGCATGCCGGTCACCTTCCAG	140	1	y	2.3e-05	+ ++ ++++++++
chr2:174464035-174464369	226	GTGCTGCGGGCAGGGGGCGGGGCCTCCTCGAGCCCGCTCTGAGTGACAGCTAATGTTCCTGTCTGCATGTACCCA	236	2	y	2.6e-07	++++++++++
chr2:174464035-174464369	226	GTGCTGCGGGCAGGGGGCGGGGCCTCCTCGAGCCCGCTCTGAGTGACAGCTAATGTTCCTGTCTGCATGTACCCA	265	3	y	2e-06	+++ ++++++
chr5:110058042-110058347	1	TAAGGCACCCGGAAAAACCCGCCTTCCCCTCTGACTGGCAGGTGCGCCTAAAAGGCTCTGATTGGCCAGTAAGTC	18	2	n	9.5e-06	++++++ +++
chr5:110058042-110058347	1	TAAGGCACCCGGAAAAACCCGCCTTCCCCTCTGACTGGCAGGTGCGCCTAAAAGGCTCTGATTGGCCAGTAAGTC	32	3	y	2.4e-05	+++ ++ +++
chr5:110058042-110058347	1	TAAGGCACCCGGAAAAACCCGCCTTCCCCTCTGACTGGCAGGTGCGCCTAAAAGGCTCTGATTGGCCAGTAAGTC	55	1	y	2.1e-08	++++++++++++++
chr8:69625170-69625846	1	aggaCGTCCCCGCCAGCCCGGATCGTGACGTCATCCGCGTACTGGCTTCCGCCCATCCCCCGCCCCCCGCAGGGC	59	2	n	4.1e-07	++++++++++
chr8:69625170-69625846	376	AAAGAACCCGCCCCCCCGCCTCCTAGAAGCTTCTGATTGGACAACCTGTCTGTAGCTCCTGATTGGTTAGAACTG	382	2	n	1.7e-07	+++++++++++
chr8:69625170-69625846	376	AAAGAACCCGCCCCCCCGCCTCCTAGAAGCTTCTGATTGGACAACCTGTCTGTAGCTCCTGATTGGTTAGAACTG	405	1	y	3.4e-06	+++++++++++ ++
chr8:69625170-69625846	376	AAAGAACCCGCCCCCCCGCCTCCTAGAAGCTTCTGATTGGACAACCTGTCTGTAGCTCCTGATTGGTTAGAACTG	431	1	y	1.3e-06	++ +++++++++++
chr8:69625170-69625846	451	CTCTAGGTGATCTGAGTGACAGGAGTAGCTCCTCTTGCAGTTCCTTAGGCTGTGAGTCTAGAGCCCATTGTTTAG	463	3	y	2e-06	+++ ++++++
chr8:69395511-69395641	1	TACACCACTTCAGAAAAGAGCCGAGAGCACGGCGCCCGGAAGAGCCCGCCTCACCTTCTGAGTGGCAGTCCGCCT	45	2	n	1.9e-05	++++++ + ++
chr8:69395511-69395641	1	TACACCACTTCAGAAAAGAGCCGAGAGCACGGCGCCCGGAAGAGCCCGCCTCACCTTCTGAGTGGCAGTCCGCCT	59	3	y	2.4e-05	+++ ++ +++
chr8:69395511-69395641	76	GGAGGTCCTGATTGGCTAGAGACGCTTGAGTGACAAGAGCCAGAGAATACTGGAG	80	1	y	1.6e-07	++ +++++++++++
chr8:69395511-69395641	76	GGAGGTCCTGATTGGCTAGAGACGCTTGAGTGACAAGAGCCAGAGAATACTGGAG	102	3	y	6e-05	+++ +++++
chr6:83831655-83832150	76	CGGCCTCACACGCGCGTCTCGCCCCGCCCCCCAGCGCCATTCATTGGCTGCCGGACAACGCCCCGTCCATCTATT	98	2	n	9.3e-07	++++++++++
chr6:83831655-83832150	76	CGGCCTCACACGCGCGTCTCGCCCCGCCCCCCAGCGCCATTCATTGGCTGCCGGACAACGCCCCGTCCATCTATT	112	1	y	2.5e-05	++ + ++++++++
chr6:83831655-83832150	151	GGACAGCAGAGAATGCCGCTCACTTACCTGGTTTTGATTGGTCTAAATGTGAAACAATGCCCGCCCAGCTCTTTC	181	1	y	9.2e-06	+++ +++++++++
chr6:83831655-83832150	151	GGACAGCAGAGAATGCCGCTCACTTACCTGGTTTTGATTGGTCTAAATGTGAAACAATGCCCGCCCAGCTCTTTC	210	2	n	5.4e-05	+++++++ +
chr6:83831655-83832150	226	AGAAGTTCCAGTTTTTGATTGGTCTTAGCGTCTGTCCATTCGCTCCGCCCTCGATGGAGACTCCCAGCTCTGATT GGCTGAAGAAGCATTGGTCACGCCTAGATTTCCAGGCCAAGGATGAATCACCTCCATGTTGGGGAGGAGCCAGAG	237	1	y	2.1e-05	++ +++++++++
chr6:83831655-83832150	226	AGAAGTTCCAGTTTTTGATTGGTCTTAGCGTCTGTCCATTCGCTCCGCCCTCGATGGAGACTCCCAGCTCTGATT GGCTGAAGAAGCATTGGTCACGCCTAGATTTCCAGGCCAAGGATGAATCACCTCCATGTTGGGGAGGAGCCAGAG	292	1	y	1.4e-08	++++++++++++++
chr6:83831655-83832150	376	TGCAAGGACTCCGGGTTTGTTTACAAAGGCTTCTGCTCCCGCTTCATCCATTGGCTAAGCTGGAAGCCTGTGTCA	419	1	y	4e-05	+ + ++++++++
chr15:76710521-76710790	1	AAAGTCCTGTCCTTAGCCAATGAGAGCGGCCGCCGGGCGGTGCTGCAGATGCTCTGAGCCCCCCGGGGAGGGGGC GGGCCTATGAGTTGTTGCGTCATCACAGCGCGCCCCGGCGCTGCGCGGAGCTGGGCGAGGCTTGCTGGGCGAGGA	14	1	n	5e-08	++++++++ +++++
chr15:76710521-76710790	1	AAAGTCCTGTCCTTAGCCAATGAGAGCGGCCGCCGGGCGGTGCTGCAGATGCTCTGAGCCCCCCGGGGAGGGGGC GGGCCTATGAGTTGTTGCGTCATCACAGCGCGCCCCGGCGCTGCGCGGAGCTGGGCGAGGCTTGCTGGGCGAGGA	68	2	y	9.2e-08	+++++++++++
chr15:78174077-78174575	1	GGCTCCTGGCAACCATCATCAACCCGCCTTCTCCCTCCATATTGTCTCCTGATTGGTTGCTCTCAAAAGCTCGGA	23	2	n	7.7e-06	++++++ +++
chr15:78174077-78174575	1	GGCTCCTGGCAACCATCATCAACCCGCCTTCTCCCTCCATATTGTCTCCTGATTGGTTGCTCTCAAAAGCTCGGA	46	1	y	2.6e-06	++ +++++++++++
chr15:78174077-78174575	76	GACCCCAGGCACCCAATAGAAGAAGGAGGCGGGGAAAACCGGTTCCCTTCGCGGAACAAAGCGGAGAGGTTTCTG	98	2	y	4.7e-06	+++ ++++++
chr15:78174077-78174575	151	CTCTTTAACTGCTCTCAGCTTGGCCAATGGCTTTAGATGCTGTCAATCACCGCTGGGCACCGCCTAGCGTCTCTG	190	3	n	1.1e-06	++++++++++
chr15:78174077-78174575	226	GAGACGCAGCCCAACCAGGATGCAGCCGGAGGCGGGAATTAATGGGGCTTTCTGATTGGCCAGAGCATGGCTTTA	251	2	y	7.7e-06	++ ++++++
chr15:78174077-78174575	226	GAGACGCAGCCCAACCAGGATGCAGCCGGAGGCGGGAATTAATGGGGCTTTCTGATTGGCCAGAGCATGGCTTTA	274	1	y	3.4e-07	+++++++++++++
chr11:4186608-4187001	1	CAGGTGAGTTTTTGTGATTGGCAGCCAGGGAAGGCGGGCCCTTGGTGACGGTTGTCCCGCCCCCTCACGTCGGTC	15	3	y	6e-06	++++++ +++
chr11:4186608-4187001	1	CAGGTGAGTTTTTGTGATTGGCAGCCAGGGAAGGCGGGCCCTTGGTGACGGTTGTCCCGCCCCCTCACGTCGGTC	28	2	y	9.5e-06	+++ ++++++
chr11:4186608-4187001	1	CAGGTGAGTTTTTGTGATTGGCAGCCAGGGAAGGCGGGCCCTTGGTGACGGTTGTCCCGCCCCCTCACGTCGGTC	56	2	n	9.2e-08	+++++++++++
chr11:4186608-4187001	151	GGGTATCCGCCCCCAGCTTTGTGGCAGCCAATGGGCACAGTGCGTGGGAGGGGCGTCGGCAGCGTCGGCGGAGGC	175	1	n	4.8e-06	++++++++ ++ ++
chr11:4186608-4187001	301	GAGAATGGGCCGCGCGAGCCCGCAGCAGGCGGGAGCCTGTCTGGGACCCGGGAAAGCCTGGCCCAGGGCCCCGAC	323	2	y	7.4e-05	++ ++++++
chr13:62015848-62016037	1	TCATATCAATCAAGTCTCACTAACCAATCAGGGCCTCCGGATAGGCCCGCCAACAGAAGGAGAGGCGTGTTCTTC	3	3	n	4.4e-05	+ +++++++
chr13:62015848-62016037	1	TCATATCAATCAAGTCTCACTAACCAATCAGGGCCTCCGGATAGGCCCGCCAACAGAAGGAGAGGCGTGTTCTTC	21	1	n	3.4e-07	+++++++++++ ++
chr13:62015848-62016037	76	CGTGTGCCTTGTTCCTCTGCTCTCTGTTTCTCTCCGTTGCAAGCAGGCTGAAAGATTGGTCTGATTTATTTTCAT	136	4	y	4.9e-05	++++++++
chr17:35516826-35517266	1	AGGCGCGCGCGCGCGCTGCGCAGACTCCTCCTTCGGAATTCCCGGGTCCGACTTcgcgcccgcgagcccgccccc ccgccggcTGCTTCTGATTGGCCATCTGAGTTGCACCCATTTGCTCTATTGGCCGATGCGCAGGGGGGAGTTGCT	67	2	n	1.7e-07	+++++++++++
chr17:35516826-35517266	1	AGGCGCGCGCGCGCGCTGCGCAGACTCCTCCTTCGGAATTCCCGGGTCCGACTTcgcgcccgcgagcccgccccc ccgccggcTGCTTCTGATTGGCCATCTGAGTTGCACCCATTTGCTCTATTGGCCGATGCGCAGGGGGGAGTTGCT	86	1	y	1.6e-07	++++++++++++++
chr17:35516826-35517266	151	CATCTCCCGCTCTCCGCCACTTCTGATTGGCCGGCACGTTTTCCCGGGTTCCCGGGGAGAGGAGGGGCCGTCAGG	170	1	y	4.1e-07	++++++++++++++
chr17:35516826-35517266	301	GCTGTAGAGCAGCCCGCCGCCCCGCGCATGCGTGATCTGGGTGTGGCGTCTAGACTGGGTGCTAGGTGTAAGGGG CGTGGCAAGAGGGCGGATCTCGCGCTGGGTAAGGGGCGTTCGGGGAGAGTCAGTTGGGGGCGGGA	369	2	y	9.5e-05	+ ++++++ +
chr17:35516826-35517266	301	GCTGTAGAGCAGCCCGCCGCCCCGCGCATGCGTGATCTGGGTGTGGCGTCTAGACTGGGTGCTAGGTGTAAGGGG CGTGGCAAGAGGGCGGATCTCGCGCTGGGTAAGGGGCGTTCGGGGAGAGTCAGTTGGGGGCGGGA	429	2	y	2.8e-06	+++++++++
chr4:133479848-133480255	1	TGGAGGGCGCTGTCCCTCTAAGTCCCGGCAGGCTCGGGCCAATCGCAAGCAGCAGCTTCTTTAAAGACCAAAGGA	36	1	n	1.8e-05	+++++++++ +++
chr4:133479848-133480255	76	GGGAATTCGGTCCGAGAGAGGGGGCGGGGAAGGGGCGTGCCTTTCAGCCAATCAGAAACTCCTGAGAGCCAGCGA	93	2	y	9.2e-08	+++++++++++
chr4:133479848-133480255	76	GGGAATTCGGTCCGAGAGAGGGGGCGGGGAAGGGGCGTGCCTTTCAGCCAATCAGAAACTCCTGAGAGCCAGCGA	104	2	y	6.5e-05	++ ++++++ +
chr4:133479848-133480255	76	GGGAATTCGGTCCGAGAGAGGGGGCGGGGAAGGGGCGTGCCTTTCAGCCAATCAGAAACTCCTGAGAGCCAGCGA	120	1	n	2.4e-07	+++++++++++++
chr4:133479848-133480255	226	TGCTGACCAATGGGCGTGCGGCCCGCGGCCTATAAGTGTCAGCTGGGCCCGAGCCGCCTGGCTCTAAGATCTGTT	229	1	n	2.5e-05	++++++++ ++ +
chr4:133479848-133480255	301	AGTCCTCCCTGCCGTCGGGGGTGTTCCCTGGGTTTGCCTCGCCGCCGCCGGGTCCCCGCACCCCGCCTTGGCCCG	362	2	n	7.1e-05	++++++ +
chr8:69716467-69717314	376	ACCACGCGATGCCTGCTTAAGAACAGAATCTGCAGCATGGCGGCGGATAGGACCCACCTCTCGTCTCGTCTGGTG	428	2	n	4.5e-05	+++ ++ + +
chr8:69716467-69717314	451	TTCTTGATTGGACATCTTGCCCCGAAGCTTTGATTGGCTAGAGCTGCACCACAAGTCTGATTGACAGGAGTTCCC	451	1	y	4.3e-05	+ +++++++ ++
chr8:69716467-69717314	451	TTCTTGATTGGACATCTTGCCCCGAAGCTTTGATTGGCTAGAGCTGCACCACAAGTCTGATTGACAGGAGTTCCC	477	1	y	8.5e-08	+++ ++++++++++
chr8:69716467-69717314	451	TTCTTGATTGGACATCTTGCCCCGAAGCTTTGATTGGCTAGAGCTGCACCACAAGTCTGATTGACAGGAGTTCCC	508	3	y	1.1e-06	++++++++++
chr8:69716467-69717314	526	TAGATGCAGCTGCGTGGATGACTCAATTCCATTGCTCTAATTGGCTAGCATGCCCTGAATGATGAAGCAGTTCCT	559	1	y	7.5e-06	+++++ ++++++++
chr8:69716467-69717314	601	TTAGGCGCTCTTGAGTGAGTGGCCTGGCCTGAAGGTTCTGATTGGCTAGCACTGCCCTACGAGGGCCTGAGTGAC AGGAACAGCTTCGCTTGGTCCTTGTGAATGAATGTCCTGCCCTCAGGGCCCTGATTGGCTAGTGAAATCTGAATG ACAGCTCCCATAAGTGGATGAACTGAAATTAAAAGACGTGGACCACACAGACCTTCCCAACTCTGGCTTTCACCC	635	1	y	7.6e-09	++++++++++++++
chr8:69716467-69717314	601	TTAGGCGCTCTTGAGTGAGTGGCCTGGCCTGAAGGTTCTGATTGGCTAGCACTGCCCTACGAGGGCCTGAGTGAC AGGAACAGCTTCGCTTGGTCCTTGTGAATGAATGTCCTGCCCTCAGGGCCCTGATTGGCTAGTGAAATCTGAATG ACAGCTCCCATAAGTGGATGAACTGAAATTAAAAGACGTGGACCACACAGACCTTCCCAACTCTGGCTTTCACCC	668	3	y	2e-06	+++ ++++++
chr8:69716467-69717314	601	TTAGGCGCTCTTGAGTGAGTGGCCTGGCCTGAAGGTTCTGATTGGCTAGCACTGCCCTACGAGGGCCTGAGTGAC AGGAACAGCTTCGCTTGGTCCTTGTGAATGAATGTCCTGCCCTCAGGGCCCTGATTGGCTAGTGAAATCTGAATG ACAGCTCCCATAAGTGGATGAACTGAAATTAAAAGACGTGGACCACACAGACCTTCCCAACTCTGGCTTTCACCC	723	1	y	8.5e-08	++ +++++++++++
chr8:69716467-69717314	601	TTAGGCGCTCTTGAGTGAGTGGCCTGGCCTGAAGGTTCTGATTGGCTAGCACTGCCCTACGAGGGCCTGAGTGAC AGGAACAGCTTCGCTTGGTCCTTGTGAATGAATGTCCTGCCCTCAGGGCCCTGATTGGCTAGTGAAATCTGAATG ACAGCTCCCATAAGTGGATGAACTGAAATTAAAAGACGTGGACCACACAGACCTTCCCAACTCTGGCTTTCACCC	745	3	y	1.1e-05	+++ ++++++
chr4:151044649-151045119	1	CGGGCAGTCCAGTCTCGAGGCCGTCCGCGTGCCCAGTGGCCGCCGGCCCCGCCCCCTGCGCGCCAGGGATCCGGT	48	2	n	2.6e-07	++++++++++
chr4:151044649-151045119	76	CCCGCCCCTTCGCCGCGCGATTGGTCGCTGTTACCGGCAACACGAGCTCCCATTGGTCAGAGGGCGGGGTGCAGG	76	2	n	9.3e-07	++++++++ ++
chr4:151044649-151045119	76	CCCGCCCCTTCGCCGCGCGATTGGTCGCTGTTACCGGCAACACGAGCTCCCATTGGTCAGAGGGCGGGGTGCAGG	121	1	y	2.6e-06	+++++ ++++++++
chr4:151044649-151045119	151	TCGTGCACGGCGGGGGTTACATAACCGCGGGCGGGTGGGCGGGTGCAAAGGCCCCCGAGTACCTTACATAACGCG	183	2	y	2.5e-06	+++ +++++++
chr4:151044649-151045119	301	CAAGTCTACTGCCGGGCTTCCCGGAGGCGTGGCCTTGGGGCTGTCAGTCACGGGAGGGCGGGGTCCGCGCAGCCA	341	3	n	2.9e-06	++++++ +++
chr4:151044649-151045119	301	CAAGTCTACTGCCGGGCTTCCCGGAGGCGTGGCCTTGGGGCTGTCAGTCACGGGAGGGCGGGGTCCGCGCAGCCA	352	2	y	1.9e-06	+++ +++++++
chr2:177957331-177957534	1	GAAGAGCCGCCTCCTCTTCTGACTGGCAGGTCCATGTGGAGGCTCTGATTGGCTATTGAGTCTTGAGTGACATGA	20	3	y	2.4e-05	+++ ++ +++
chr2:177957331-177957534	1	GAAGAGCCGCCTCCTCTTCTGACTGGCAGGTCCATGTGGAGGCTCTGATTGGCTATTGAGTCTTGAGTGACATGA	42	1	y	3.4e-09	++++++++++++++
chr2:177957331-177957534	1	GAAGAGCCGCCTCCTCTTCTGACTGGCAGGTCCATGTGGAGGCTCTGATTGGCTATTGAGTCTTGAGTGACATGA	64	3	y	2.7e-05	+++ +++++
chr15:99294995-99295367	1	ccgggggtgggcccaggcgcgccccgccccagggggcggTCCCAGGATTCTGCGCACGTgggggcggggcctggc	1	2	y	1.1e-05	+++++ +++
chr15:99294995-99295367	1	ccgggggtgggcccaggcgcgccccgccccagggggcggTCCCAGGATTCTGCGCACGTgggggcggggcctggc	23	2	n	1.9e-05	++++++++
chr15:99294995-99295367	1	ccgggggtgggcccaggcgcgccccgccccagggggcggTCCCAGGATTCTGCGCACGTgggggcggggcctggc	58	2	y	7.3e-07	+ +++++++++
chr15:99294995-99295367	151	GAGCCCCGGCCACGAAGGGGTGCGACCCCCCCACTGGCCCCGCCCTCCCGGCCGAAGCCCGGCCAATCAGAGCTG	189	2	n	1.9e-06	+++++++ +++
chr15:99294995-99295367	151	GAGCCCCGGCCACGAAGGGGTGCGACCCCCCCACTGGCCCCGCCCTCCCGGCCGAAGCCCGGCCAATCAGAGCTG	210	1	n	8.5e-08	++++++++++++++
chr15:99294995-99295367	301	GAGAGGCCCGGGGCTGTCTCACAGCGCCCCCTGCGGCCCGGGCTCGAGCCGGGGAGGCGGGAGGGCCGCCGG	351	2	y	1.5e-06	++++ ++++++
chr15:82354195-82354601	1	AGCTTGGCGCAGGCCGGTGGCCGCGGCCGCCATCTTGCCGAGGAAGCCCCGCCCCTTCAGCGTGCGCACGCGCGG	48	2	n	9.3e-07	++++++++ ++
chr15:82354195-82354601	76	TGCCACGGGACTCGCTGCCGTGCCTCCTGCAGTGCAGAGGGAAGGACTGACTGGACTAGGGCTCTCTGATTGGCT GGAAGCCTCGGGCTCTGCAATGCGCATGCTCTACCGCGGAAACACCGATCCGGGGTTGGCTCGTTCAACGGCGGC	138	1	y	1.2e-07	+++++++++++++
chr2:177206481-177206682	1	CTGACTGGCAGGTCCATGGGGAGGCTCTGATTGGCTATTGAGTCTTGAGTGACATGAGCACCACCCTTAGGGTTA	2	3	y	2.4e-05	+++ ++ +++
chr2:177206481-177206682	1	CTGACTGGCAGGTCCATGGGGAGGCTCTGATTGGCTATTGAGTCTTGAGTGACATGAGCACCACCCTTAGGGTTA	24	1	y	3.4e-09	++++++++++++++
chr2:177206481-177206682	1	CTGACTGGCAGGTCCATGGGGAGGCTCTGATTGGCTATTGAGTCTTGAGTGACATGAGCACCACCCTTAGGGTTA	46	3	y	2.7e-05	+++ +++++
chr5:138619599-138620003	151	ACAGCCAAAGCCCGCCCCCCGCCCTCCCTCTGTGTGTCTGATTGGACACTTCTCAACTCAGTGCCTCCGATTGGA CAGGGCTCCGGGTCCAGCCCCTTGAGTGACAGTAGATGGCGCCAACGCACAGCTGTAGGAGCTCAGAATGACAGG	161	2	n	4.1e-07	++++++++++
chr5:138619599-138620003	151	ACAGCCAAAGCCCGCCCCCCGCCCTCCCTCTGTGTGTCTGATTGGACACTTCTCAACTCAGTGCCTCCGATTGGA CAGGGCTCCGGGTCCAGCCCCTTGAGTGACAGTAGATGGCGCCAACGCACAGCTGTAGGAGCTCAGAATGACAGG	185	1	y	9.4e-05	+++++++++ ++
chr5:138619599-138620003	151	ACAGCCAAAGCCCGCCCCCCGCCCTCCCTCTGTGTGTCTGATTGGACACTTCTCAACTCAGTGCCTCCGATTGGA CAGGGCTCCGGGTCCAGCCCCTTGAGTGACAGTAGATGGCGCCAACGCACAGCTGTAGGAGCTCAGAATGACAGG	214	1	y	6.1e-06	+++++++++++ ++
chr5:138619599-138620003	151	ACAGCCAAAGCCCGCCCCCCGCCCTCCCTCTGTGTGTCTGATTGGACACTTCTCAACTCAGTGCCTCCGATTGGA CAGGGCTCCGGGTCCAGCCCCTTGAGTGACAGTAGATGGCGCCAACGCACAGCTGTAGGAGCTCAGAATGACAGG	248	3	y	2e-06	+++ ++++++
chr10:81600942-81601194	1	TAGGCCACACCCACACACCACGCCCCCTGCACCCACCGAGGGAAGCGTGTATCAGGGCCCAGGCCACGGTGCACG	19	2	n	5.1e-05	+ ++++++++
chr10:81600942-81601194	76	TGGGCCCCGGACTCAGCGAACCGCCCCTGCAGGCCCTGACCAATCAGAAGGCGGCGAGCCCACGTGGGCTGCGAG	112	1	n	5.9e-07	++++++++++++++
chr10:81600942-81601194	151	CCAGAATGCTCATTGCTCAGTTTGTGGCCGTGCTGTCAATCACGGAGTTCCTGCTTCGGCTTAACCCTCGCGTTC	183	3	n	1.1e-06	++++++++++
chr9:22307645-22307959	1	CCAAGATGGTGGTATGCTGTCACGTCAGAGACAAAGGCCGGACCGCCAAAGCCCGCCCCCTTCCCTTTGTCTATG	52	2	n	7.3e-07	++++++++++
chr9:22307645-22307959	76	CGCCCGATTGCGCGTTTCTCACCCCGGCGCCTTCGATTGGACAGGGTTTCAGTTCTCATCCGGCTCAGACCTGAC TGACAGAAGCTGGCACCAATCCATGAGTGCATAAAGCAAGCCAACTTTATTCCCACCGTTTAAAAATGACAACTT	105	1	y	1.9e-05	+++ +++++++ ++
chr9:22307645-22307959	76	CGCCCGATTGCGCGTTTCTCACCCCGGCGCCTTCGATTGGACAGGGTTTCAGTTCTCATCCGGCTCAGACCTGAC TGACAGAAGCTGGCACCAATCCATGAGTGCATAAAGCAAGCCAACTTTATTCCCACCGTTTAAAAATGACAACTT	147	3	y	2.9e-06	+++ ++++++
chr10:130542015-130542479	226	GGGAGGTGCTCGAGTCACTCCAGACTTACTGGCCAATCAGAGCCTTTAGGCGGACCTGCCAGTCAGAAGAGAAGG CGGGTTTTCCGGGTGCTGTGGTGCTGGTTTCGCTTAGTAGCTGAGCAGGTTTGAATGGTACTTGTGTGCTGTGCT	255	1	n	2.1e-08	++++++++++++++
chr10:130542015-130542479	226	GGGAGGTGCTCGAGTCACTCCAGACTTACTGGCCAATCAGAGCCTTTAGGCGGACCTGCCAGTCAGAAGAGAAGG CGGGTTTTCCGGGTGCTGTGGTGCTGGTTTCGCTTAGTAGCTGAGCAGGTTTGAATGGTACTTGTGTGCTGTGCT	281	3	n	2.4e-05	+++ ++ +++
chr10:130542015-130542479	226	GGGAGGTGCTCGAGTCACTCCAGACTTACTGGCCAATCAGAGCCTTTAGGCGGACCTGCCAGTCAGAAGAGAAGG CGGGTTTTCCGGGTGCTGTGGTGCTGGTTTCGCTTAGTAGCTGAGCAGGTTTGAATGGTACTTGTGTGCTGTGCT	294	2	y	7.7e-06	+++ ++++++
chr8:69996246-69996858	76	CGGCGCCGCAGGCCAATGAAGTCTGGCCGGGGCACTCAAGATCGGCACCCCACGAGGGGTGTGGCCAGCCTCAGG	85	1	n	8.1e-05	+++++++ + +
chr8:69996246-69996858	151	ACAGACAGTTATCAGCAGCCAATGAGCGCGTTGGCCGGCTGGCCCTCCGGATCGCTCCGGTGGCTGGGACGGGCC	166	1	n	1.1e-06	++++++++ ++ ++
chr8:69996246-69996858	226	TAGGGGGCGGGACAGGATGACTGACAGACGAGCATCCAATGGGAGAATGGAGCGGGTTCCAGAGCCAGTCAACTC	226	2	y	5.2e-07	++++++++++
chr8:69996246-69996858	226	TAGGGGGCGGGACAGGATGACTGACAGACGAGCATCCAATGGGAGAATGGAGCGGGTTCCAGAGCCAGTCAACTC	243	3	y	2.9e-06	+++ ++++++
chr8:69996246-69996858	226	TAGGGGGCGGGACAGGATGACTGACAGACGAGCATCCAATGGGAGAATGGAGCGGGTTCCAGAGCCAGTCAACTC	258	1	n	1.9e-05	++ +++++ ++++
chr8:69996246-69996858	301	GCCATCGGGGAGGGATTTAGGTTTGGGGCGGGAATGCCGTGAGGGGTGCGGTCTTGGAGGACACGTCAATTCGTG	322	2	y	2.8e-05	++++++++
chr8:69996246-69996858	451	CCCGCTGTGCTCAGCAGGGGCGCCCCACCCACAATGCGCCGGAGGCTGTCGGGCCTGGACAGGCGCCTCTGAGTA	474	2	n	5.7e-05	+++ +++ +
chr6:146888366-146888698	1	AGGAATGTGGGAGACCAGGCGCCGCCTCGGAGTGACCGCGCGCCCGGCCAATCAGCGGGCCGCAAGCGCGAGGCC CCGCCCCCTCCGCCCCTGGGGCTGGTTCCCGCCGGGGGAGGGGCGGGGCGGTGGGACGAGGAGGACCGAGGGGAG	45	1	n	1.5e-06	+++++++++++ ++
chr6:146888366-146888698	1	AGGAATGTGGGAGACCAGGCGCCGCCTCGGAGTGACCGCGCGCCCGGCCAATCAGCGGGCCGCAAGCGCGAGGCC CCGCCCCCTCCGCCCCTGGGGCTGGTTCCCGCCGGGGGAGGGGCGGGGCGGTGGGACGAGGAGGACCGAGGGGAG	75	2	n	9.2e-08	+++++++++++
chr6:146888366-146888698	1	AGGAATGTGGGAGACCAGGCGCCGCCTCGGAGTGACCGCGCGCCCGGCCAATCAGCGGGCCGCAAGCGCGAGGCC CCGCCCCCTCCGCCCCTGGGGCTGGTTCCCGCCGGGGGAGGGGCGGGGCGGTGGGACGAGGAGGACCGAGGGGAG	112	2	y	1.2e-06	++ ++++++++
chr6:83867020-83867470	1	CCGCCCCCAGATTCCCGCGCTCGTCTCCTATTGGCTGGCTTGTTGGTGGGCGGAACCCTGCACGGAGCTCAACGC	24	1	y	6.1e-06	++++ ++++++++
chr6:83867020-83867470	226	AGCGCTTCCCTTGTCCGCGGTGCCCCTGGTCGCCTGCTCTGGGGCTTCAGGGGGCGGGCCTCCAGGTCCCCCGTG	273	2	y	2.6e-07	++++++++++
chr6:83867020-83867470	301	ACTGTCAGTCACTCCCTGGCTGCTGCGCTCGTTGAGCTCTGGGCGAGTGGGAGGTGGCTGGGTGTCAGTTAAAGG	302	3	n	2.9e-06	++++++ +++
chr4:138250192-138250440	76	GAGCCAGGTACCCTCGCAGCCTCTGATTGGGCGGCACGGCGGAGCGGAGCGGCTCCGATTGGCTGGTGAGGCCGG	95	1	y	1.1e-05	+++++++++++ ++
chr4:138250192-138250440	76	GAGCCAGGTACCCTCGCAGCCTCTGATTGGGCGGCACGGCGGAGCGGAGCGGCTCCGATTGGCTGGTGAGGCCGG	127	1	y	1e-07	++++++++++++++
chr4:138250192-138250440	151	CGCCGCGGCCAGGTGATGCCCAAGGGGTCGGATCCCAGGGCCACGTGGGGGGCGCGCGGCgcgggggcgggggcg	196	2	y	9.8e-05	++++++++ +
chr4:138250192-138250440	151	CGCCGCGGCCAGGTGATGCCCAAGGGGTCGGATCCCAGGGCCACGTGGGGGGCGCGCGGCgcgggggcgggggcg	211	2	y	4.1e-07	+ +++++++++
chr4:138250192-138250440	226	tgtgcgggggtggggCGGGCCCC	234	2	y	5.3e-06	++ ++++++++
chr8:69208957-69209219	1	TAAACTCCAACGCCAAAGGAGGGACTCTTGTCACTCAGGCCTCATCAGCCAATGAGAACCTGCAGTCGGAGCGTC	28	3	n	6e-05	+++++ +++
chr8:69208957-69209219	1	TAAACTCCAACGCCAAAGGAGGGACTCTTGTCACTCAGGCCTCATCAGCCAATGAGAACCTGCAGTCGGAGCGTC	46	1	n	2.8e-07	++++++++ +++++
chr8:69208957-69209219	76	ATCGGGGAGGCGGGCTCTTCCGGGCGCCAGGCTCCAGGCTCCGTTCCGAAGCTGGGAAAATGCAAGCGGTTCTTT	79	2	y	1.5e-06	++++ ++++++
chr1:131827654-131828172	76	AGGAGTACATGCGTAGCAGAACGCTCGCCTTGAGAGGCCGTGGGAACTCAGGAGCGCAGCACCCGCCCGCGCTTG	137	2	n	4.5e-05	+++++++ + +
chr1:131827654-131828172	151	AGCACCGCGAGCCCACAACACCCTCCAATTCTGAGTTCCCGTCACTCTGCTGCGTTTTCCCCCTCACCCCGCCCC CAGCTCAAGAAACGCCGGGGAAATGGGCGGGGCCTGGGCGGGGCCCGCCCCTTTTCCTGCTCTGATTGGCTGATG	218	2	n	1.9e-06	+++++++++
chr1:131827654-131828172	151	AGCACCGCGAGCCCACAACACCCTCCAATTCTGAGTTCCCGTCACTCTGCTGCGTTTTCCCCCTCACCCCGCCCC CAGCTCAAGAAACGCCGGGGAAATGGGCGGGGCCTGGGCGGGGCCCGCCCCTTTTCCTGCTCTGATTGGCTGATG	246	2	y	2.2e-05	+ +++++++
chr1:131827654-131828172	151	AGCACCGCGAGCCCACAACACCCTCCAATTCTGAGTTCCCGTCACTCTGCTGCGTTTTCCCCCTCACCCCGCCCC CAGCTCAAGAAACGCCGGGGAAATGGGCGGGGCCTGGGCGGGGCCCGCCCCTTTTCCTGCTCTGATTGGCTGATG	257	2	y	4.2e-05	+ +++++++
chr1:131827654-131828172	151	AGCACCGCGAGCCCACAACACCCTCCAATTCTGAGTTCCCGTCACTCTGCTGCGTTTTCCCCCTCACCCCGCCCC CAGCTCAAGAAACGCCGGGGAAATGGGCGGGGCCTGGGCGGGGCCCGCCCCTTTTCCTGCTCTGATTGGCTGATG	269	2	n	3.8e-06	++++++++ +
chr1:131827654-131828172	151	AGCACCGCGAGCCCACAACACCCTCCAATTCTGAGTTCCCGTCACTCTGCTGCGTTTTCCCCCTCACCCCGCCCC CAGCTCAAGAAACGCCGGGGAAATGGGCGGGGCCTGGGCGGGGCCCGCCCCTTTTCCTGCTCTGATTGGCTGATG	284	1	y	1.4e-08	++++++++++++++
chr5:109923335-109923806	226	AGGTGCTCGAGTCACTCAAGACTTACTGGCCAATCAGAGCCTCTAGGCGGACCTGCCAGTCAGAGGGGAAGGCGG GTTTTTCCGGGTACCTTGGGCCGGCTTCACTTAGTAGCTGAGCAGGCTTGAATGGTCCCTTATGCTGTGCTCTCT	252	1	n	2.1e-08	++++++++++++++
chr5:109923335-109923806	226	AGGTGCTCGAGTCACTCAAGACTTACTGGCCAATCAGAGCCTCTAGGCGGACCTGCCAGTCAGAGGGGAAGGCGG GTTTTTCCGGGTACCTTGGGCCGGCTTCACTTAGTAGCTGAGCAGGCTTGAATGGTCCCTTATGCTGTGCTCTCT	278	3	n	2.4e-05	+++ ++ +++
chr5:109923335-109923806	226	AGGTGCTCGAGTCACTCAAGACTTACTGGCCAATCAGAGCCTCTAGGCGGACCTGCCAGTCAGAGGGGAAGGCGG GTTTTTCCGGGTACCTTGGGCCGGCTTCACTTAGTAGCTGAGCAGGCTTGAATGGTCCCTTATGCTGTGCTCTCT	291	2	y	9.5e-06	+++ ++++++
chr2:167661633-167661936	1	ACAGCCAATCGGAgcccgcgcccgcgccgcgcccggccAATCGCAGGCCTTCGGGCCTCAGCCAAccgcggcgcc ggggggcggggTCGCAGCTGGACGCAGCTGGACGCGGAAGGCAGGGTGGATGTGCGCGTCCCCGCTGCGCCCCGC	2	1	n	1e-07	++++++++++++++
chr2:167661633-167661936	1	ACAGCCAATCGGAgcccgcgcccgcgccgcgcccggccAATCGCAGGCCTTCGGGCCTCAGCCAAccgcggcgcc ggggggcggggTCGCAGCTGGACGCAGCTGGACGCGGAAGGCAGGGTGGATGTGCGCGTCCCCGCTGCGCCCCGC	34	1	n	5.4e-06	++++++++++ +++
chr2:167661633-167661936	1	ACAGCCAATCGGAgcccgcgcccgcgccgcgcccggccAATCGCAGGCCTTCGGGCCTCAGCCAAccgcggcgcc ggggggcggggTCGCAGCTGGACGCAGCTGGACGCGGAAGGCAGGGTGGATGTGCGCGTCCCCGCTGCGCCCCGC	75	2	y	4.1e-07	++++++++++
chr5:109866413-109866886	226	CTCAAGACTTACTGGCCAATCAGAGCCTTTAGGCGAACCTGCCAGTCAGAAGGGAAGGCGGGGTTTCCGGGTGCC	238	1	n	2.1e-08	++++++++++++++
chr5:109866413-109866886	226	CTCAAGACTTACTGGCCAATCAGAGCCTTTAGGCGAACCTGCCAGTCAGAAGGGAAGGCGGGGTTTCCGGGTGCC	264	3	n	2.4e-05	+++ ++ +++
chr5:109866413-109866886	226	CTCAAGACTTACTGGCCAATCAGAGCCTTTAGGCGAACCTGCCAGTCAGAAGGGAAGGCGGGGTTTCCGGGTGCC	277	2	y	9.5e-06	+++ ++++++
chr17:17004691-17005201	1	TTGAGTCCTGGCTCTTGAGAACAAGGTCACAGCCCACAAAGGGGAGGAGCAGGCAGCCAATCAGAGGTGAGCTGG	54	1	n	5e-08	++++++++++++++
chr17:17004691-17005201	226	CGCACACTCTCACCCTGAGAGAGTTGCTCCTGTCACTCAGGATTTACTGGCCAATCACGGCATTGAGGAGGATCT	255	3	n	2e-06	++++++ +++
chr17:17004691-17005201	226	CGCACACTCTCACCCTGAGAGAGTTGCTCCTGTCACTCAGGATTTACTGGCCAATCACGGCATTGAGGAGGATCT	273	1	n	2.6e-06	++++++++++ ++
chr17:17004691-17005201	301	GCCAGTCGTAAGAGGAGGGTGGTTTTTCCGGATGCATTTTGCTGGTTCCCCGTGAGATCTGCCAGTCAAAAGCGG	359	3	n	2.4e-05	+++ ++ +++
chr17:17004691-17005201	376	GGGGTGGTTCTACCGGAACGCATTTTCCTGGTTCTCTGTGGGATCTGCCAGTCATAAGAGGTGGGTGTTTCTTCC	420	3	n	2.4e-05	+++ ++ +++
chr17:17004691-17005201	376	GGGGTGGTTCTACCGGAACGCATTTTCCTGGTTCTCTGTGGGATCTGCCAGTCATAAGAGGTGGGTGTTTCTTCC	430	2	y	4.8e-05	+ + ++ +++
chr4:137862126-137862358	1	TAAGGAGCCCGCGGAGGTGTGGGGGGGAGTCTAACCGACGCTTCTGATTGGCTGTTTCTTCGGGGCCCGCAGCCC	41	1	y	1e-07	++++++++++++++
chr4:137862126-137862358	76	CCGCACTTCTGTATTGGTTCGCGGCGGGCCCCGCCCTCTGGCCTGGGCGCCCCAGCCTCGCGCGCCGCCCCGGCA	105	2	n	3.3e-06	+++++++ ++
chr5:110135627-110136033	76	TTCTCTCATCTGCGCAGGCTCCGATCGCTCCGCCCCGCCCCCTCCGGATAGCCTTTTCTGGCACCGCTCTAGCCG	109	2	n	9.2e-08	+++++++++++
chr5:110135627-110136033	151	TCGCTCTCGGTGGGCACGGCCGCCAGCCAATCACAGGGCGTACCGCTCTGCTCCCCTCCCCCTCGCCTCCCGTGG	174	1	n	6.8e-07	++++++++++ +++
chr5:110135627-110136033	301	GCGTGGGGTAAGCTGGCCGGCGGGTGGGGTCCTGGCTGGGGAGGCAGGCGGCGGCCAGGCTATAGCAGCGGTGCT	318	2	y	9.5e-05	++ +++ +++
chr7:18910358-18910752	1	CGGACTCGATCTTCACGAGCGGTTCAACCGCCGAAGTTTCAGCTCCGCCCACATCCGGCCTTCTCACTTCTGATT GGTCTGATCTTACAGGCAGCCATGTTTCCATAAGTCAAAAGCGACGCCCGTCACTCTGTCCCGCCCCCATGGGAG	67	1	y	4.3e-06	+++++++++++++
chr7:18910358-18910752	1	CGGACTCGATCTTCACGAGCGGTTCAACCGCCGAAGTTTCAGCTCCGCCCACATCCGGCCTTCTCACTTCTGATT GGTCTGATCTTACAGGCAGCCATGTTTCCATAAGTCAAAAGCGACGCCCGTCACTCTGTCCCGCCCCCATGGGAG	135	2	n	3.3e-06	+++++++++
chr7:18910358-18910752	151	AACCCGCCTTCCGAAGTTTACAATTGGTCTATTTGGAAGAGGCGTTACTAACACGTGTGGGGAGACCTCCGAGGT	153	2	n	1.7e-05	++++++ ++
chr7:18910358-18910752	226	TTACAGTCTGTTTCTAGTGATTATTGGGTAGATATTCTGCCAATCATAAGAAAAAGGTGGTCCCTTGGAGTAGAA	262	3	n	6e-06	+++ ++++++
chr16:14163135-14163383	1	TGGCCTGCGCCTCCTGCGGCCCCTCCCGCCCCCACCGAGGCTTGGCCCAGCCGCGCCCGGGCCTAGAGAGAAAAA	25	2	n	7.3e-07	+++++++++ +
chr16:14163135-14163383	76	GTTTCCAAACCTCGCTTCTTTGCGCTGATTGGCCGAGTCAGACGCGTCCCGAGAGCGGCAGCCAATGGGAGGCGC	97	1	y	6.8e-07	++ +++++++++++
chr16:14163135-14163383	76	GTTTCCAAACCTCGCTTCTTTGCGCTGATTGGCCGAGTCAGACGCGTCCCGAGAGCGGCAGCCAATGGGAGGCGC	134	1	n	1.5e-06	++++++++ +++++
chr6:113237613-113238002	1	TCCGGCGGTTCCTTCCTCTCTTGTTGCCAATGGTTCCCGCCTTTCCCCTCCCCGCAGCCGCGGTGGTTTAGCCCG	36	2	n	2.6e-05	++++++ ++
chr6:113237613-113238002	76	GCTTCCCCCGGGGAAACCCCTTGGGCGGAGCGCGGCCCCCGCCGTGAGGCCACTTGGATCCCTCCGCGTCAGGGG TGGGCCGGGGACCTGTGGGCCGGGCACGAACCCCGGGCTCTGATTGGCTGCGGCGGGAGTAAACATCCGGAGAGG TGGGGCGGGGCCGGAAGTGGAAGAAGAAGGCGGCGGCTGAGTCGGTTCAGGAGGTTTTAGAGCCGGAGTCCGAGC	144	2	y	3.7e-05	++++ +++
chr6:113237613-113238002	76	GCTTCCCCCGGGGAAACCCCTTGGGCGGAGCGCGGCCCCCGCCGTGAGGCCACTTGGATCCCTCCGCGTCAGGGG TGGGCCGGGGACCTGTGGGCCGGGCACGAACCCCGGGCTCTGATTGGCTGCGGCGGGAGTAAACATCCGGAGAGG TGGGGCGGGGCCGGAAGTGGAAGAAGAAGGCGGCGGCTGAGTCGGTTCAGGAGGTTTTAGAGCCGGAGTCCGAGC	187	1	y	1.4e-08	++++++++++++++
chr6:113237613-113238002	76	GCTTCCCCCGGGGAAACCCCTTGGGCGGAGCGCGGCCCCCGCCGTGAGGCCACTTGGATCCCTCCGCGTCAGGGG TGGGCCGGGGACCTGTGGGCCGGGCACGAACCCCGGGCTCTGATTGGCTGCGGCGGGAGTAAACATCCGGAGAGG TGGGGCGGGGCCGGAAGTGGAAGAAGAAGGCGGCGGCTGAGTCGGTTCAGGAGGTTTTAGAGCCGGAGTCCGAGC	224	2	y	5.3e-06	++ ++++++++
chr2:177840374-177840564	1	TCTTCTGACTGGCAGGTCAACGTGGAGGTTCTGATTGGCTATTGAGTCTTGAGTGACATGAGCACCACCCTTAGG	6	3	y	2.4e-05	+++ ++ +++
chr2:177840374-177840564	1	TCTTCTGACTGGCAGGTCAACGTGGAGGTTCTGATTGGCTATTGAGTCTTGAGTGACATGAGCACCACCCTTAGG	28	1	y	7.6e-09	++++++++++++++
chr2:177840374-177840564	1	TCTTCTGACTGGCAGGTCAACGTGGAGGTTCTGATTGGCTATTGAGTCTTGAGTGACATGAGCACCACCCTTAGG	50	3	y	2.7e-05	+++ +++++
chr11:78328299-78328592	1	AGCCGAGCGCGTACCCTCTCACGGGCTCCGCCTGCGCACTGGCGTGCGTCAGCAGTGTTGCTCGTGATTGGCAGC	65	3	y	6e-06	++++++ +++
chr11:78328299-78328592	76	GGTCGCGCACCGTGGTCCCGCCCCCTCATTCTGGAGTTTCCGATTGGAGAAAGCTCATGAGGCCCCGCCCCATCG	92	2	n	9.2e-08	+++++++++++
chr11:78328299-78328592	76	GGTCGCGCACCGTGGTCCCGCCCCCTCATTCTGGAGTTTCCGATTGGAGAAAGCTCATGAGGCCCCGCCCCATCG	112	1	y	4.6e-05	++++++++++ +
chr11:78328299-78328592	76	GGTCGCGCACCGTGGTCCCGCCCCCTCATTCTGGAGTTTCCGATTGGAGAAAGCTCATGAGGCCCCGCCCCATCG	139	2	n	3.8e-06	++++++++ ++
chr11:78328299-78328592	226	GTGGAGGGCGCAGTGGGGAGGTCTCGCGGGCAGAATGTGTGGGTGGGGCGCGAGAAGCCTGACAGCTC	262	2	y	3.2e-05	+ + +++ +++
chr2:160731172-160731399	1	AAGACGTCTGCGCAGAGGGGGCGTGGCAGGCGTGCTGTCACTCACGGCCTGTTAGCCAATCCACGAGTGCGCCCC	15	2	y	3.4e-05	+++++++++ +
chr2:160731172-160731399	1	AAGACGTCTGCGCAGAGGGGGCGTGGCAGGCGTGCTGTCACTCACGGCCTGTTAGCCAATCCACGAGTGCGCCCC	35	3	n	2e-06	++++++ +++
chr2:160731172-160731399	1	AAGACGTCTGCGCAGAGGGGGCGTGGCAGGCGTGCTGTCACTCACGGCCTGTTAGCCAATCCACGAGTGCGCCCC	53	1	n	6.9e-05	+++++++++ +
chr2:160731172-160731399	76	TCCCCGGAGAGGGTGCGCGGAGGGCCCGCCCCCGCCGCCACCGCGGGTGTGAGGAGGCCAGGCTGGCGCGGCTCC	100	2	n	4.1e-07	+++++++++ +
chr5:135744159-135744499	76	CTCGCGCCGCCGTGACTGCCAACGGGAAAAGGCCCGGCGTAATCTGCGCGTGAGCCCCGCCCCTAGGAGCAGCCA ATCAGAGCCAGGGACGAGAGCTGGGCGGGGACATGGGCCCGCAGGGCGTCTCCTCGAATTGAGACCAGAGCTGGG	131	2	n	8.5e-06	++++++++
chr5:135744159-135744499	76	CTCGCGCCGCCGTGACTGCCAACGGGAAAAGGCCCGGCGTAATCTGCGCGTGAGCCCCGCCCCTAGGAGCAGCCA ATCAGAGCCAGGGACGAGAGCTGGGCGGGGACATGGGCCCGCAGGGCGTCTCCTCGAATTGAGACCAGAGCTGGG	145	1	n	1.4e-08	++++++++++++++
chr5:135744159-135744499	76	CTCGCGCCGCCGTGACTGCCAACGGGAAAAGGCCCGGCGTAATCTGCGCGTGAGCCCCGCCCCTAGGAGCAGCCA ATCAGAGCCAGGGACGAGAGCTGGGCGGGGACATGGGCCCGCAGGGCGTCTCCTCGAATTGAGACCAGAGCTGGG	169	2	y	5.4e-05	+ +++++++
chr19:14598087-14598659	151	CTCTCCAGGAGCCCCGCCCTCCCGCGGCGCGAGGGCGCCGCATCAACCAATCGGAGATGGCTGAACATTAATCGC	163	2	n	1.9e-06	+++++++ +++
chr19:14598087-14598659	151	CTCTCCAGGAGCCCCGCCCTCCCGCGGCGCGAGGGCGCCGCATCAACCAATCGGAGATGGCTGAACATTAATCGC	194	1	n	1.7e-06	+++++++++++++
chr19:14598087-14598659	226	GGTTCTGTGTTACTGCCCATCATTTCACCGCTGACAAATGGCAAGCCAGGAGGGCGGGGCCGGGCAGGCTAGGCC	238	3	n	9.6e-05	+++ + ++++
chr19:14598087-14598659	226	GGTTCTGTGTTACTGCCCATCATTTCACCGCTGACAAATGGCAAGCCAGGAGGGCGGGGCCGGGCAGGCTAGGCC	273	2	y	7.7e-06	++ +++++++
chr19:14598087-14598659	301	CACGTGGGGACAGGGCGTGGCGTGGAGCTCCGACCAATAACTGCAAAGAATTGGTGCTGGCGGAggcggggcgca	331	1	n	7.3e-05	++++++++ + ++
chr19:14598087-14598659	301	CACGTGGGGACAGGGCGTGGCGTGGAGCTCCGACCAATAACTGCAAAGAATTGGTGCTGGCGGAggcggggcgca	360	2	y	3.3e-06	+ ++ ++++++
chr19:14598087-14598659	451	TCAGCTGTCAATCAAAGTAACGTGGGGTGGCGAGCCGCGGCGGCTGCTGTCGCTGCTGCACTGGCTGCATCTTTA	455	3	n	1.1e-06	++++++++++
chr9:121710183-121710545	1	TTGGCCATCAATCATCAGCAAAGTCCCGCCCCCAGAGTAGCGTCATAGACTCTGCAAGAGCAAGCAAGAGCTTGC	6	4	n	2.1e-05	+++ ++++++
chr9:121710183-121710545	1	TTGGCCATCAATCATCAGCAAAGTCCCGCCCCCAGAGTAGCGTCATAGACTCTGCAAGAGCAAGCAAGAGCTTGC	25	2	n	1.9e-06	+++++++++
chr9:121710183-121710545	76	TCGCGCGTCCAATCACAGGTGACGCCCCCGCGTCGCACCCAATCAGCGTCGAGTCTCTAACACCCCCGCCTCCAC	81	1	n	1.6e-05	++ +++++++ +++
chr9:121710183-121710545	76	TCGCGCGTCCAATCACAGGTGACGCCCCCGCGTCGCACCCAATCAGCGTCGAGTCTCTAACACCCCCGCCTCCAC	111	1	n	2.6e-05	++ ++++++++ +
chr9:121710183-121710545	76	TCGCGCGTCCAATCACAGGTGACGCCCCCGCGTCGCACCCAATCAGCGTCGAGTCTCTAACACCCCCGCCTCCAC	140	2	n	4.7e-06	++++++ ++ +
chr17:46751758-46752512	151	CCCACAGGCCCCGCCCCCTCCCGCCCCTCGGGCTTGGCTACGCCCCGCGGCCCCGCCCCCTCACCTTCGCATTTG	160	2	n	9.2e-08	+++++++++++
chr17:46751758-46752512	151	CCCACAGGCCCCGCCCCCTCCCGCCCCTCGGGCTTGGCTACGCCCCGCGGCCCCGCCCCCTCACCTTCGCATTTG	202	2	n	9.2e-08	+++++++++++
chr17:46751758-46752512	451	GACTGCGCACGTGCCTCTGGGTAACCACGGCAACGGCGAGCTCCGGCCCGCCCCACGCCCGGTAGCCTCTAGCGG	497	2	n	1e-05	++++++++ +
chr17:46751758-46752512	526	CTTGCGAAACCGACCAAGGCCCGCGGGCGACGCAACCAATGGGTTCGCTCGGCGTCTGCTTTATAGCCAATGAGA GGAACTATCTTTTTTTTTTCCCATCTCAGCCAATCAGAGAGCGGATGGTGGCTTTGGCGCCCTATAGCGATATCA	558	1	n	6.9e-05	++++++++ ++ +
chr17:46751758-46752512	526	CTTGCGAAACCGACCAAGGCCCGCGGGCGACGCAACCAATGGGTTCGCTCGGCGTCTGCTTTATAGCCAATGAGA GGAACTATCTTTTTTTTTTCCCATCTCAGCCAATCAGAGAGCGGATGGTGGCTTTGGCGCCCTATAGCGATATCA	589	1	n	1.6e-07	++++++++ +++++
chr17:46751758-46752512	526	CTTGCGAAACCGACCAAGGCCCGCGGGCGACGCAACCAATGGGTTCGCTCGGCGTCTGCTTTATAGCCAATGAGA GGAACTATCTTTTTTTTTTCCCATCTCAGCCAATCAGAGAGCGGATGGTGGCTTTGGCGCCCTATAGCGATATCA	627	1	n	1.2e-07	+++++++++++++
chr2:60383282-60383603	1	CGGCCTCACCACGCCTCTGGGGCAACCTCTGAGGCGCGCAGACCCCGCCTCCGCCGCGCTCGGCCAATCAGAGCT	44	2	n	3.3e-06	++++++ ++ +
chr2:60383282-60383603	1	CGGCCTCACCACGCCTCTGGGGCAACCTCTGAGGCGCGCAGACCCCGCCTCCGCCGCGCTCGGCCAATCAGAGCT	61	1	n	8.5e-08	++++++++++++++
chr2:60383282-60383603	76	CCGCTTTGGGTCCCGGGCCCAGCGGAGGCTTTGCAGGAGTCCCCACCCACCCAAGGCAGACCTCTGCGAAGGCTC	117	2	n	1.7e-05	+++ +++ +++
chr2:60383282-60383603	151	GGGACCTCCAGAAGGCGGGAGGAGTGCACAGGACAACCACAGGGTTTGGGAGTCCACTCCCCATCTTCTTAAGCA	159	2	y	1.4e-05	++ ++++++
chr9:66834666-66835134	1	AATGCGGGGCGGGGCAGGCCTGCCAGGTACTCCGGGCTCGATCAGAGAAGGGGGCGGAGCAAAGCCCGGGAGGCG GGGCCTCGAGGTGCTCCAAGGCTTTTTTGAGCGGAGGGCGGGACGTACGAGAGGCGGTGCCTTAGGGGCGGTTTC	3	2	y	1.5e-05	+ ++++++++
chr9:66834666-66835134	1	AATGCGGGGCGGGGCAGGCCTGCCAGGTACTCCGGGCTCGATCAGAGAAGGGGGCGGAGCAAAGCCCGGGAGGCG GGGCCTCGAGGTGCTCCAAGGCTTTTTTGAGCGGAGGGCGGGACGTACGAGAGGCGGTGCCTTAGGGGCGGTTTC	67	2	y	3.3e-06	+++ ++++++
chr9:66834666-66835134	1	AATGCGGGGCGGGGCAGGCCTGCCAGGTACTCCGGGCTCGATCAGAGAAGGGGGCGGAGCAAAGCCCGGGAGGCG GGGCCTCGAGGTGCTCCAAGGCTTTTTTGAGCGGAGGGCGGGACGTACGAGAGGCGGTGCCTTAGGGGCGGTTTC	107	2	y	4.7e-06	++ +++++++
chr9:66834666-66835134	151	TGGCCAATCAGAGCCTGGGGGCGGTGCAGGACACAGCCAGTCAGAGCAGAGGGCGGAGCGGCGCTCTAGATGAAG	151	1	n	2.1e-08	++++++++++++++
chr9:66834666-66835134	226	TGCCTTGAGATGCTCCGCGGCTTGTTTTTGCAGAGGGCGGGGTGGAGTCGAGGAGGCGGGTCCTCGAGCTGCTCC	256	2	y	3.3e-06	++ +++++++
chr9:66834666-66835134	226	TGCCTTGAGATGCTCCGCGGCTTGTTTTTGCAGAGGGCGGGGTGGAGTCGAGGAGGCGGGTCCTCGAGCTGCTCC	275	2	y	1.1e-06	++++ ++++++
chr9:66834666-66835134	301	ACAGCAAGGCAGGACTGGGCGGGGGCGGAGCTCGAAAAACAGAGCCTGTATCGCACAACGGTCAGTCGCAGAGGG	313	2	y	2.4e-05	++ +++++++
chr4:28812950-28813215	1	GACTCCGCTCGGCGTTGATTGGCTCCTGCTCAGGACCCCGCCTCCAAGGTAGAGGCGGCCACTTCGTAGGGACCC GCCCCCCGGCCGTGGGAATCGCCGCCTAGCAGGCGGGCTGCGGCTGCCACTCAGTCGGAGTGGCGGAGGCTCTGG	12	1	y	4.8e-06	++ +++++++++
chr4:28812950-28813215	1	GACTCCGCTCGGCGTTGATTGGCTCCTGCTCAGGACCCCGCCTCCAAGGTAGAGGCGGCCACTTCGTAGGGACCC GCCCCCCGGCCGTGGGAATCGCCGCCTAGCAGGCGGGCTGCGGCTGCCACTCAGTCGGAGTGGCGGAGGCTCTGG	37	2	n	1.3e-05	++++++ ++
chr4:28812950-28813215	1	GACTCCGCTCGGCGTTGATTGGCTCCTGCTCAGGACCCCGCCTCCAAGGTAGAGGCGGCCACTTCGTAGGGACCC GCCCCCCGGCCGTGGGAATCGCCGCCTAGCAGGCGGGCTGCGGCTGCCACTCAGTCGGAGTGGCGGAGGCTCTGG	73	2	n	4.1e-07	++++++++++
chr4:28812950-28813215	1	GACTCCGCTCGGCGTTGATTGGCTCCTGCTCAGGACCCCGCCTCCAAGGTAGAGGCGGCCACTTCGTAGGGACCC GCCCCCCGGCCGTGGGAATCGCCGCCTAGCAGGCGGGCTGCGGCTGCCACTCAGTCGGAGTGGCGGAGGCTCTGG	102	2	y	8.4e-05	++ ++++++
chr4:28812950-28813215	1	GACTCCGCTCGGCGTTGATTGGCTCCTGCTCAGGACCCCGCCTCCAAGGTAGAGGCGGCCACTTCGTAGGGACCC GCCCCCCGGCCGTGGGAATCGCCGCCTAGCAGGCGGGCTGCGGCTGCCACTCAGTCGGAGTGGCGGAGGCTCTGG	119	3	n	2.4e-05	+++ ++ +++
chr4:28812950-28813215	151	GTTCGTAGCCCCGCCTCCTCCCCCCTAATTGATATTATTGGAGTGTGGAGCAAGCGGCCGGTCTGCAGTCGGAGA	160	2	n	1.1e-06	++++++ ++++
chr10:52417343-52417757	151	CCCGGTCGCGTCGGAGTTCCCCGGCAGCCAATCAGAACTCTCCATGTACTAACGGGGGCGGGGCTGCGGAGGGCG	175	1	n	3.1e-08	++++++++++++++
chr10:52417343-52417757	151	CCCGGTCGCGTCGGAGTTCCCCGGCAGCCAATCAGAACTCTCCATGTACTAACGGGGGCGGGGCTGCGGAGGGCG	202	2	y	2.5e-06	+++++++++
chr10:52417343-52417757	226	GAGGAAGATGGCGGCGGGGGCTAGGTGAGGTGTTGGCAGTGGCGAGGGGCTCGGGCGCGGGGGGTGGGGGGACGC	283	2	y	6.1e-06	++++++ +++
chr7:127208605-127209424	76	GCCTGCGCGAGGAAAGGCCCTCCCGCACCCCTCCtttttttttttttttttttttttttAATCTCCCGCCCCCTC	140	2	n	9.2e-08	+++++++++++
chr7:127208605-127209424	151	TATAAGACCAGGACGGATAATAGGAGAGAGAAAACTGAGTTCCTGCCAATCGATGGAAGGGTGGGTGGGGTTAGA GGCGGGAAGAGGGTGGGTACTCGAGAAAGAGGAAGTGAAGAAGGCAGAGGCAGGACGAAGAAAACAAGCAATAGA	193	3	n	6e-05	+++ +++++
chr7:127208605-127209424	151	TATAAGACCAGGACGGATAATAGGAGAGAGAAAACTGAGTTCCTGCCAATCGATGGAAGGGTGGGTGGGGTTAGA GGCGGGAAGAGGGTGGGTACTCGAGAAAGAGGAAGTGAAGAAGGCAGAGGCAGGACGAAGAAAACAAGCAATAGA	209	2	y	1.7e-05	+++ +++ +++
chr7:127208605-127209424	151	TATAAGACCAGGACGGATAATAGGAGAGAGAAAACTGAGTTCCTGCCAATCGATGGAAGGGTGGGTGGGGTTAGA GGCGGGAAGAGGGTGGGTACTCGAGAAAGAGGAAGTGAAGAAGGCAGAGGCAGGACGAAGAAAACAAGCAATAGA	221	2	y	3.2e-05	+ ++++++
chr7:127208605-127209424	151	TATAAGACCAGGACGGATAATAGGAGAGAGAAAACTGAGTTCCTGCCAATCGATGGAAGGGTGGGTGGGGTTAGA GGCGGGAAGAGGGTGGGTACTCGAGAAAGAGGAAGTGAAGAAGGCAGAGGCAGGACGAAGAAAACAAGCAATAGA	232	2	y	2.8e-05	++ +++ +++
chr7:127208605-127209424	301	AAAGAGAGATCCTGAGCATCCAGGCCAATAAACACAACTGAAGAGAGTGAGTGACCGCAGAAGGGCGGGGAATGA	322	1	n	4.9e-05	+++++++ + ++
chr7:127208605-127209424	301	AAAGAGAGATCCTGAGCATCCAGGCCAATAAACACAACTGAAGAGAGTGAGTGACCGCAGAAGGGCGGGGAATGA	348	3	y	3.9e-05	+++ ++++ +
chr7:127208605-127209424	301	AAAGAGAGATCCTGAGCATCCAGGCCAATAAACACAACTGAAGAGAGTGAGTGACCGCAGAAGGGCGGGGAATGA	359	2	y	2.2e-05	+ +++++++
chr7:127208605-127209424	376	GGCTGGTGTTGGGCAGTAAGAGGCAGGGACTAGGAACTTGTTAGCCAATGGAAATGGTGAAAAGGGAACCAAATT	417	1	n	1e-05	++++++++ + ++
chr7:127208605-127209424	451	AAAAAGGGGGGCTAGGCAGTCAAATTGACTGACGGTCACGTCTATTCCTGTGATGACAGCATCAGCAGTCAATAG	476	3	y	1.6e-05	+++ ++++ +
chr7:127208605-127209424	526	AAAGAGCCGAAAAATTCTTAGACTTCCTGAGATGATCAGGAAGGAATGACAACCAGGGAGAGGCGGGCTTAACTT	582	2	y	6.8e-06	++ + ++++++
chr7:127208605-127209424	601	GTGATTAACTTGTTAGCCAATGACTGTCCTTCTCCACTTTGCATAAGAGTAGAAATAGATAACATTCTCTGCTTC	614	1	n	2.9e-05	++++++++ + +
chr7:127208605-127209424	751	AGGTGACAACTGGGGACATCACTGAGAAGAGCCTGGAGCATCGGTGCGGCTCCTAGCCAATAAGAGTGC	804	1	n	1.5e-06	++++++++ ++++
chr18:77047273-77047481	1	CGGACCTGTGCCTGCTGCAAATCGGACGCTTAACCAGCCCGCCCCCTTCGGGATTGGCCAGAGCCCAGACATGCC AACCAATCATCGGCCACAGACGGATTCTTTAACGCGTCAATCAAGGTCACACTAAGCGTTTGATCCAGAGAGTCT	38	2	n	7.3e-07	++++++++++
chr18:77047273-77047481	1	CGGACCTGTGCCTGCTGCAAATCGGACGCTTAACCAGCCCGCCCCCTTCGGGATTGGCCAGAGCCCAGACATGCC AACCAATCATCGGCCACAGACGGATTCTTTAACGCGTCAATCAAGGTCACACTAAGCGTTTGATCCAGAGAGTCT	75	1	n	2.1e-05	++++++++++ ++
chr18:77047273-77047481	1	CGGACCTGTGCCTGCTGCAAATCGGACGCTTAACCAGCCCGCCCCCTTCGGGATTGGCCAGAGCCCAGACATGCC AACCAATCATCGGCCACAGACGGATTCTTTAACGCGTCAATCAAGGTCACACTAAGCGTTTGATCCAGAGAGTCT	109	3	n	7e-05	++++++++
chr18:77047273-77047481	151	GCGCAATCCCAGTCAATCAAGAGGCTGCGAGCGTATGATTAGTAGAGCCGTTGGAGAA	160	3	n	2.7e-05	+ ++++++++
chr5:110094398-110094843	1	AAGCCTGCTCAGCTACTAAGAGGAACCCTCCGCGTGGCTCGCAGAAGAACCCGCCTCCTCTTCTGACTGGCACGC	50	2	n	1.1e-06	++++++ ++++
chr5:110094398-110094843	76	CCGAAGGCTTTGATTGGCCAGTGATTCTTGAGTGACATGAGAATCTCTCTTAGGGTTAGAGTGTGCGGAAGAGAC	82	1	y	3.4e-07	+++ ++++++++++
chr5:110094398-110094843	76	CCGAAGGCTTTGATTGGCCAGTGATTCTTGAGTGACATGAGAATCTCTCTTAGGGTTAGAGTGTGCGGAAGAGAC	104	3	y	2.7e-05	+++ +++++
chr11:32454963-32455517	1	CGGCCTCGGGCGCTCGTCTCCACTCGGTTCTGCTCGGTATTCTCCGCCCCCTCGGTGCATGCAGCCAATCAGAGC	62	1	n	1.4e-08	++++++++++++++
chr11:32454963-32455517	76	GCGGCCCCGCCCCTCGAGGCCGTTCCAGCGGGCCGGCCGAGTGCAAGCCGAGCCCGGCTGAGGGTGGCGCCGCGG GCGGGGGCGATGGGGCCTGGCAGCCGGGTGGCGGCGGCGGCAGTGGTGGGGCTTGCCTAGACGCGGGGGCGCGGG	81	2	n	2.8e-06	++++++++ +
chr11:32454963-32455517	76	GCGGCCCCGCCCCTCGAGGCCGTTCCAGCGGGCCGGCCGAGTGCAAGCCGAGCCCGGCTGAGGGTGGCGCCGCGG GCGGGGGCGATGGGGCCTGGCAGCCGGGTGGCGGCGGCGGCAGTGGTGGGGCTTGCCTAGACGCGGGGGCGCGGG	145	2	y	6.2e-05	+ +++++++
chr11:32454963-32455517	76	GCGGCCCCGCCCCTCGAGGCCGTTCCAGCGGGCCGGCCGAGTGCAAGCCGAGCCCGGCTGAGGGTGGCGCCGCGG GCGGGGGCGATGGGGCCTGGCAGCCGGGTGGCGGCGGCGGCAGTGGTGGGGCTTGCCTAGACGCGGGGGCGCGGG	213	2	y	8.8e-05	+ +++++++ +
chr11:32454963-32455517	451	cgacgcgggagcaggctgaggcggcggccgggacgagcgcCCTGAGGTGGCGGCCGCGGCCCCATGGGCGGGTGC	512	2	y	3e-05	+++++++
chr1:82283311-82283511	1	AAGGGTGAGCGAGCTTTCCCAGCGAGGCCCCAGCCTACCCCGCCCCCGCCCCGGCCATCACTCATGCTGATTGGC TCTTACAGGAGCCAATCGGCACCCGGCGCCCGGCCCGCCGTCCTAAGGGGCGGAGGCTCGGCTGCTACCGCCAAC	39	2	n	4.1e-07	+++++++++ +
chr1:82283311-82283511	1	AAGGGTGAGCGAGCTTTCCCAGCGAGGCCCCAGCCTACCCCGCCCCCGCCCCGGCCATCACTCATGCTGATTGGC TCTTACAGGAGCCAATCGGCACCCGGCGCCCGGCCCGCCGTCCTAAGGGGCGGAGGCTCGGCTGCTACCGCCAAC	64	1	y	6.1e-06	+ ++++++++++
chr1:82283311-82283511	1	AAGGGTGAGCGAGCTTTCCCAGCGAGGCCCCAGCCTACCCCGCCCCCGCCCCGGCCATCACTCATGCTGATTGGC TCTTACAGGAGCCAATCGGCACCCGGCGCCCGGCCCGCCGTCCTAAGGGGCGGAGGCTCGGCTGCTACCGCCAAC	84	1	n	4.3e-06	++++++++++ ++
chr13:37857749-37858075	76	GCTCCTCACCTCCGCTCCAGTGCTGGGCACTCCGCGAGCGGGCCGTGGAGCTGTCAGTCACGGCAGCGCCGCCGC CGATTGGCTGAGGCGGCAGCGGGGGGTGGGGCAGAGCGCTGGCATCCCCCGATGGGACCTTGAAGCTCTGCTCTC	126	3	n	2.9e-06	++++++ +++
chr13:37857749-37858075	76	GCTCCTCACCTCCGCTCCAGTGCTGGGCACTCCGCGAGCGGGCCGTGGAGCTGTCAGTCACGGCAGCGCCGCCGC CGATTGGCTGAGGCGGCAGCGGGGGGTGGGGCAGAGCGCTGGCATCCCCCGATGGGACCTTGAAGCTCTGCTCTC	147	1	y	1.7e-06	++ +++++++++++
chr13:37857749-37858075	76	GCTCCTCACCTCCGCTCCAGTGCTGGGCACTCCGCGAGCGGGCCGTGGAGCTGTCAGTCACGGCAGCGCCGCCGC CGATTGGCTGAGGCGGCAGCGGGGGGTGGGGCAGAGCGCTGGCATCCCCCGATGGGACCTTGAAGCTCTGCTCTC	170	2	y	6.1e-06	++++++ +++
chr11:95858699-95859415	1	AACGCACAAGCCTCGGGGAATCGCTCTCTTGTACCCAATCAGAGGTCCCCTGGCACCACTTACCCGCCCCCCGGC	32	1	n	3e-06	++ +++++++++++
chr11:95858699-95859415	1	AACGCACAAGCCTCGGGGAATCGCTCTCTTGTACCCAATCAGAGGTCCCCTGGCACCACTTACCCGCCCCCCGGC	63	2	n	4.1e-07	++++++++++
chr11:95858699-95859415	76	CCCGTCCGGCCACTTCATTCGCGGCTCACAAAGCAATCCTACCGCGCGTTCTGCACAGCAGCCAATCAGAGGGTA GGGGGCGGGGACTCCGAGGCGCGGTGTGTGCAGCGGTACTCAGACAGGAAAGCCTCGGGATCCTTCGGGTTCTTT	134	1	n	5e-08	++++++++++++++
chr11:95858699-95859415	76	CCCGTCCGGCCACTTCATTCGCGGCTCACAAAGCAATCCTACCGCGCGTTCTGCACAGCAGCCAATCAGAGGGTA GGGGGCGGGGACTCCGAGGCGCGGTGTGTGCAGCGGTACTCAGACAGGAAAGCCTCGGGATCCTTCGGGTTCTTT	149	2	y	5.2e-07	++++++++++
chr19:24280206-24281243	76	CGCGCGCCCTGCACCCAAACGCGCGCGCAACCAGAGCGACTCGGCGCGTGCGCGCTGCGCGTCCCCGGCATAGGG GCGGGCGCGGCCTGCGCTCCGGTGTGCGGCCCGGCGAAGCGCGTACTCACGGCGTGGCGGGTGGCGCCGGCGTTG	145	2	y	1.3e-05	++++++++
chr19:24280206-24281243	376	GGCCGCTCCGCCCCGCGCGAGGACTCGGTGGTGCCACCTGGTGGCCGTGccccccccccgcccccccccgccccc	432	2	n	1.7e-07	+++++++++++
chr19:24280206-24281243	826	gttgctgatggctataggatgagggagggtgagttttcttctgggatatggcctctgattggctgtcctagctcc	877	1	y	5e-08	++++++++++++++
chr17:55959012-55959605	76	ACAAAGATTGCAGCCAATGAGAACGATGAAGCGGGTAGGCACCAACCAGTGAGCCGGCTTAGGAAGTGGCGACAC	86	1	n	2.8e-07	++++++++ +++++
chr17:55959012-55959605	451	CTCCCCGCCCCCCCCCCCCCAGCTTCGTGAGTAACCAATCATCACCAGGGAAGCGGAGCTTCTGTCACTTTACCC	454	2	n	1.7e-07	+++++++++++
chr17:55959012-55959605	451	CTCCCCGCCCCCCCCCCCCCAGCTTCGTGAGTAACCAATCATCACCAGGGAAGCGGAGCTTCTGTCACTTTACCC	482	1	n	1.1e-05	++++++++++ ++
chr2:150136615-150136920	76	GAGCCCGCCTTCACTTTTGAGTGGCAGATCCGGCTGGATGTCCTGATTGGCTAGTGAATCTGGAGTGACATACAC	79	2	n	2e-05	++++++ + +
chr2:150136615-150136920	76	GAGCCCGCCTTCACTTTTGAGTGGCAGATCCGGCTGGATGTCCTGATTGGCTAGTGAATCTGGAGTGACATACAC	93	3	y	2.4e-05	+++ ++ +++
chr2:150136615-150136920	76	GAGCCCGCCTTCACTTTTGAGTGGCAGATCCGGCTGGATGTCCTGATTGGCTAGTGAATCTGGAGTGACATACAC	115	1	y	1.6e-07	++ +++++++++++
chr10:128270362-128270700	1	CCGACTAGGGGGGCGGGAGCGGGCACTAACGAGCTTCTCCCTCTCCGCCAATCACTGAAGTCGGCGGTGTGGTTT	7	2	y	1.1e-06	++++++++++
chr10:128270362-128270700	1	CCGACTAGGGGGGCGGGAGCGGGCACTAACGAGCTTCTCCCTCTCCGCCAATCACTGAAGTCGGCGGTGTGGTTT	45	3	n	3.3e-05	+ + ++++++
chr10:128270362-128270700	76	CAAGCAGCTTGTCCAGCCCAGCGCTGAACGGGGTTGTGTTTCAGCCAATGAGAGTGACACGCGGGGAGGGCGTGG	117	1	n	1.1e-06	++++++++ ++++
chr10:128270362-128270700	76	CAAGCAGCTTGTCCAGCCCAGCGCTGAACGGGGTTGTGTTTCAGCCAATGAGAGTGACACGCGGGGAGGGCGTGG	139	2	y	8.1e-05	+++ +++++ +
chr18:73572100-73572848	301	TCCCGCCCCGTTCCCCGGGCGCCCGGCTACGTCACAAAGAGTGGCGTGTAAATGGAACAATCTAGTTGCTCCCCT	302	2	n	1.4e-05	++++++++ +
chr18:73572100-73572848	376	CGAGAGCACGCCCCGCAAGAGGAGGGCGGGGCGGAGGGAGGGACGGAAGGAGCCGGCTTCGAAGACTGGCTCGTT	395	2	y	7.7e-06	++ +++++++
chr18:73572100-73572848	451	CTCGTCATCCAATCCGAACGGTCTGGGGCGAGGCGGGGCGGGGCCCATGAAGAGGGCGGGGGTGGGGCCGAGGGA	456	1	n	5.2e-05	++ ++++++ ++++
chr18:73572100-73572848	451	CTCGTCATCCAATCCGAACGGTCTGGGGCGAGGCGGGGCGGGGCCCATGAAGAGGGCGGGGGTGGGGCCGAGGGA	482	2	y	6.1e-06	++ ++++++++
chr18:73572100-73572848	451	CTCGTCATCCAATCCGAACGGTCTGGGGCGAGGCGGGGCGGGGCCCATGAAGAGGGCGGGGGTGGGGCCGAGGGA	500	2	y	6.1e-06	++ +++++++
chr18:73572100-73572848	526	AACGAGCGAGAAGGCTGCGGGACGAGAGGGCGGGCTCCTCCCGGAGATTAAAAGCAGCCAATCAGAGCGCGCCGG	549	2	y	1.5e-06	+++ +++++++
chr18:73572100-73572848	526	AACGAGCGAGAAGGCTGCGGGACGAGAGGGCGGGCTCCTCCCGGAGATTAAAAGCAGCCAATCAGAGCGCGCCGG	580	1	n	1.4e-08	++++++++++++++
chr18:73572100-73572848	676	AAGAAACCCTGAGAGGGGAGCCGCTGCCGTCCCCACCCACCCACCTAGTTCCCTACCTCGGCTCCGTTCCCGG	707	2	n	1.7e-05	+++ +++ +++
chr7:25221288-25221564	76	GCGAGGGCGCGTGCCCTGCGCTACCAGCTCTGATTGGCTGCCTCTCCTGAGAGCACCGCCCAATGGGAGGCGTGG	102	1	y	1.4e-08	++++++++++++++
chr7:25221288-25221564	76	GCGAGGGCGCGTGCCCTGCGCTACCAGCTCTGATTGGCTGCCTCTCCTGAGAGCACCGCCCAATGGGAGGCGTGG	132	1	n	4.6e-05	++ +++++ +++++
chr7:25221288-25221564	226	ATGGGTGAGGGCGCCGCAGGGCGGGCGGGGAAGAGAGCGCTGGGTGTAAGG	244	2	y	3e-05	+++ +++++++
chr15:100761682-100762065	1	AGGGTACCGCCGGACAGCGTCCTCCCGTGCTCCGCGCGCTGATTGGCTGCTCGGGGCGCCCTCTGATTGGCTGCT	36	1	y	1.9e-07	++ +++++++++++
chr15:100761682-100762065	1	AGGGTACCGCCGGACAGCGTCCTCCCGTGCTCCGCGCGCTGATTGGCTGCTCGGGGCGCCCTCTGATTGGCTGCT	60	1	y	5e-08	++++++++++++++
chr15:100761682-100762065	226	CGAGACCAGGCTCCGCCCGGCCATGCCCGCCGGGAGCAACGAGCCGGACGGCGTCCTCAGCTATCAGGTGGGCCC CGCCTCCCGCTCCTCCCCGGCTCAGCCTCGGTGTTCTGCCCACCGCCCCGCTCCTGCCCCAGCCGGGGTTCCAGG	299	2	n	3.3e-06	++++++ +++
chr12:24831331-24831754	1	GGAGGAGGGGCGCGGCGAGGCCAGCGTCCTCTGATTGGCTGTGGGAGTCGGGGCGCCGCGACGCCATTGGACCGC	28	1	y	5e-08	++++++++++++++
chr12:24831331-24831754	76	GGAGCTGTCTGGCGCACGAGTGCGCGAGGTGGGGAGGGGGCTCTGGAAGCTGCTGGAAATcgggccgcccggcgg	98	2	y	7.7e-05	+ + ++ +++
chr12:24831331-24831754	151	cgtgagggggccgcgcggctgggtgggcggggcgcccAGCAGTGGGCGGGGCCACTAACTCCGCCCACTGCCCCT	171	2	y	2.5e-06	+++ +++++++
chr12:24831331-24831754	151	cgtgagggggccgcgcggctgggtgggcggggcgcccAGCAGTGGGCGGGGCCACTAACTCCGCCCACTGCCCCT	190	2	y	4.7e-06	++ +++++++
chr12:24831331-24831754	226	CCCCGCGCGGCTGCTCCGAccgcgggcggccgaggggcgggcgcgccgcTGCATCCCCATCCTCGGCGTAGCTCG	256	2	y	2.8e-06	+ ++++++++
chr7:44929483-44930105	1	CGCCCCGCCTCAGACCCGCCCCTACGGATTGTCATCCGGGAACGTACGCCACTTGTTAGCTGAGAGCCCTGCCGC	4	2	n	5.4e-05	++++++ +
chr7:44929483-44930105	1	CGCCCCGCCTCAGACCCGCCCCTACGGATTGTCATCCGGGAACGTACGCCACTTGTTAGCTGAGAGCCCTGCCGC	15	2	n	3.8e-06	++++++++ +
chr7:44929483-44930105	76	TCACAATAGAACGCCCGCCCTCCTCTCTCTCTGATTGGCTAAATAGTAAAGACACCAGGTGATGATTGGTGCAGT	89	2	n	7.7e-06	+++++++ ++
chr7:44929483-44930105	76	TCACAATAGAACGCCCGCCCTCCTCTCTCTCTGATTGGCTAAATAGTAAAGACACCAGGTGATGATTGGTGCAGT	103	1	y	3.5e-08	+++++++++++++
chr7:44929483-44930105	226	GGGACCGCCCCCTGAACGGCCGAGACCAACGCTAATTGGATGGACTACCAGCTCCGCGCCAGTAGGGCGGGATGT	286	2	y	4.5e-05	+ +++++++
chr7:44929483-44930105	301	AAGAGGCCGAAGGAGGCGGAACTTCGGGAAAAGAAGACCAATGGGTGAGGAGATTGCTCTTCGCAAGGCTCTGCC	335	1	n	9.9e-05	+++++++ ++ +
chr7:44929483-44930105	376	GATTCGCCGGAAGCGTCATACTTCCGCCCTCGAAGGGGCGGTTGTGGGGGGCGGGCAAAAGGGCGACGATCCGTA	420	2	y	9.3e-07	++++++++++
chr11:106084136-106084695	76	GCCAGAGAGGCTGAGAGCGCCAGCTAGCGACACTCCGCGGCGGGTACTCAGCGCTCTCTCCGTGATTGGCTAGGC	134	1	y	3.4e-06	+ ++++++++++
chr11:106084136-106084695	151	GCGAGAGGACGGGCGCTGTCTCAGTGATTGGCAGGCTCTAGCCAGCCCTCGGAAATCGCCTTGACTTCGCCCATT	175	3	y	6e-06	++++++ +++
chr11:106084136-106084695	226	GGCATCCTGTGAGAGTAGGCGGGATTGGTCCGTCGTGATTAGCTGGCGGATGAGAGTGAGGGCGTTGGGAGAGAG	238	2	y	9.5e-06	+++ ++++++
chr11:106084136-106084695	301	CGGGGAGGAGGAGGCGGGAGTATCTGACTTCCTCCTGGTTATTGGCTGGTAATGAGAGTGGGGGTAGTGCCAAGG	308	2	y	1.1e-06	++++ ++++++
chr11:106084136-106084695	301	CGGGGAGGAGGAGGCGGGAGTATCTGACTTCCTCCTGGTTATTGGCTGGTAATGAGAGTGGGGGTAGTGCCAAGG	335	1	y	2.5e-05	++ + ++++++++
chr11:106084136-106084695	376	CCCAGCGGCTGCATGCGATTGGCAGATGCTGGCATGAGTGACAGGCTGCAAGGCTTGCTGCGCGCCCAGCGGTTT	391	3	y	6e-05	+++++ +++
chr11:106084136-106084695	376	CCCAGCGGCTGCATGCGATTGGCAGATGCTGGCATGAGTGACAGGCTGCAAGGCTTGCTGCGCGCCCAGCGGTTT	410	3	y	2e-06	+++ ++++++
chr1:168432356-168432673	1	AGGGAGGAGGGCTCTTGAGCCCCGCCCCCTTCTATGATTGGCTAGTCCTGAAAGTGGGctcctcctccccctact	21	2	n	7.3e-07	++++++++++
chr1:168432356-168432673	76	ttccacccagcgtctcctcctcggcctccttcagctcctcctAGCCCGGGAGTCTTGTCAATCAGAGTTCAGAGG TGGGCCGGGAAGGAGGCGGAGCTATGACCCAGTCTCCAGTTCTTAAAGGCGCAGAGAGACCTTAGCTTCAGCTCT	130	3	n	2.3e-05	+++++++++
chr1:168432356-168432673	76	ttccacccagcgtctcctcctcggcctccttcagctcctcctAGCCCGGGAGTCTTGTCAATCAGAGTTCAGAGG TGGGCCGGGAAGGAGGCGGAGCTATGACCCAGTCTCCAGTTCTTAAAGGCGCAGAGAGACCTTAGCTTCAGCTCT	144	2	y	7.1e-05	+ ++ +++
chr17:24886316-24886852	1	GTTGCTTTTCGCGGCTCTCTTCCGCTTCCTCTCCAAACTTTCGCAGCCTTTGAACCAATGGTGACAAGAGCCCGC CCCTTACTCATTTTGAGAGGTTAGTCATTCACCGTCCAGCCAATCAGATCACCCAAGGAGGTCCCGATCCTGGCA	71	2	n	3.3e-06	++++++++ +
chr17:24886316-24886852	1	GTTGCTTTTCGCGGCTCTCTTCCGCTTCCTCTCCAAACTTTCGCAGCCTTTGAACCAATGGTGACAAGAGCCCGC CCCTTACTCATTTTGAGAGGTTAGTCATTCACCGTCCAGCCAATCAGATCACCCAAGGAGGTCCCGATCCTGGCA	112	1	n	6.8e-07	++++++++++++ +
chr17:24886316-24886852	226	TTGACCGCTCTAGCGAGGGCCAATAGAAACTTTGGTTCAGGATTGACAGTTTGTGCAAGCCTCTTGACAGCAGTC	242	1	n	4e-05	+++++++ + +++
chr17:24886316-24886852	226	TTGACCGCTCTAGCGAGGGCCAATAGAAACTTTGGTTCAGGATTGACAGTTTGTGCAAGCCTCTTGACAGCAGTC	265	3	y	3.3e-05	+++++++++
chr17:24886316-24886852	301	CTGTCTCGCGAGACCCGCCCCCGCGCGAAGCTGCCATAGAGCCCGCCTTCGGCTGCCGGGCCAATGCAGGGCGGG GGCGGGGATTGTTTGCGTCGCGGCCGGAACGGAAAGTGGGTCAGCGCCGGGGGAGCTTTTTGGCCGCAGGTGAGC	314	2	n	4.1e-07	+++++++++ +
chr17:24886316-24886852	301	CTGTCTCGCGAGACCCGCCCCCGCGCGAAGCTGCCATAGAGCCCGCCTTCGGCTGCCGGGCCAATGCAGGGCGGG GGCGGGGATTGTTTGCGTCGCGGCCGGAACGGAAAGTGGGTCAGCGCCGGGGGAGCTTTTTGGCCGCAGGTGAGC	342	2	n	2.8e-05	++++++ +
chr17:24886316-24886852	301	CTGTCTCGCGAGACCCGCCCCCGCGCGAAGCTGCCATAGAGCCCGCCTTCGGCTGCCGGGCCAATGCAGGGCGGG GGCGGGGATTGTTTGCGTCGCGGCCGGAACGGAAAGTGGGTCAGCGCCGGGGGAGCTTTTTGGCCGCAGGTGAGC	371	2	y	4.1e-07	+ +++++++++
chr4:11966319-11966840	76	cggcgcgctgcagctcggcccaggccagcccactccgcgcccctgcctcgcccggcctccaccctgccccgcccc CACAGGCGCTCTTGAGCTCTTCGCCTTCTGATTGGCTGCGCAATGGCGGGTGGGCGGGACCCGGAGGGCCAGAGG GGCGGGGGGCGGAAGAGGGCGCGCTCCCCGCCAGTTTTGTGACGTCACGGAGGTCAGACAATCCCTTCCATTTGG	143	2	n	7.3e-07	+++++++++ +
chr4:11966319-11966840	76	cggcgcgctgcagctcggcccaggccagcccactccgcgcccctgcctcgcccggcctccaccctgccccgcccc CACAGGCGCTCTTGAGCTCTTCGCCTTCTGATTGGCTGCGCAATGGCGGGTGGGCGGGACCCGGAGGGCCAGAGG GGCGGGGGGCGGAAGAGGGCGCGCTCCCCGCCAGTTTTGTGACGTCACGGAGGTCAGACAATCCCTTCCATTTGG	175	1	y	1e-07	++++++++++++++
chr4:11966319-11966840	76	cggcgcgctgcagctcggcccaggccagcccactccgcgcccctgcctcgcccggcctccaccctgccccgcccc CACAGGCGCTCTTGAGCTCTTCGCCTTCTGATTGGCTGCGCAATGGCGGGTGGGCGGGACCCGGAGGGCCAGAGG GGCGGGGGGCGGAAGAGGGCGCGCTCCCCGCCAGTTTTGTGACGTCACGGAGGTCAGACAATCCCTTCCATTTGG	198	2	y	2.5e-06	+++ +++++++
chr4:11966319-11966840	76	cggcgcgctgcagctcggcccaggccagcccactccgcgcccctgcctcgcccggcctccaccctgccccgcccc CACAGGCGCTCTTGAGCTCTTCGCCTTCTGATTGGCTGCGCAATGGCGGGTGGGCGGGACCCGGAGGGCCAGAGG GGCGGGGGGCGGAAGAGGGCGCGCTCCCCGCCAGTTTTGTGACGTCACGGAGGTCAGACAATCCCTTCCATTTGG	221	2	y	5.3e-06	+ ++++++++
chr4:11966319-11966840	301	CGCGGCTAGCCTATTGGTTCCACGCGTGCGCGCGCCCCGTGACCACGCCCTGTTGCTGGTGAAGGTGGGTTTGCG	359	2	y	5.9e-05	+ + ++ +++
chr4:11966319-11966840	376	CGTGCCGCGAGGTGGACAGCCTTGGTTGGGTTGCGTTTGGACTCCCAGATGGGGAAGCGCCTGGGCGGGATCCAG	434	2	y	4.2e-05	+ +++++++
chr4:11966319-11966840	451	CATCCCTGAGCGCGTGGCGCTTTGGTAGCCAGTTGCTTCCTGGCGGGCGGGCTTTCGCGAATGCCTGGCAC	491	2	y	5.4e-05	++ +++++++
chr6:88084367-88084673	76	CCAGCCATCTTGTGGTGCTGTTGGCCAATCAGCGGTTGCGCCGTGGCGGGGGGGCGGGGCGCGTGTCGGTGGCGC	97	1	n	6.8e-07	+++++++++++ ++
chr6:88084367-88084673	76	CCAGCCATCTTGTGGTGCTGTTGGCCAATCAGCGGTTGCGCCGTGGCGGGGGGGCGGGGCGCGTGTCGGTGGCGC	123	2	y	1.7e-07	+++++++++++
chr15:99651577-99651897	76	TCACGCACCAGCCAATCACAGAGGAGCTCATAATCACGAAGACGCAAGTGTCAGGGCCAGGGGGCGGGCGCAAAA	84	1	n	1.3e-06	++++++++++ ++
chr15:99651577-99651897	76	TCACGCACCAGCCAATCACAGAGGAGCTCATAATCACGAAGACGCAAGTGTCAGGGCCAGGGGGCGGGCGCAAAA	133	2	y	2.6e-07	++++++++++
chr3:96905099-96905497	1	GTGAGTGACAGCACCACACGTCAGCCTTCGCCACCCGGGCAAGGGAGCGGGCTGAGCAAATCCAGGTTCTCCCAA	2	3	y	2e-06	+++ ++++++
chr3:96905099-96905497	226	GCTTACGTCATCAAGATGCGCCCTAGCCAGCCAATCAGCGGCCGCATTCTCCGTTTGCCTGGAAGGTGAGGGTGG GCAGGGCTGGAAGCCGCTGGGTAGACTCAAAGCAGATGTGTTTCTTCTTAGTAGGCACAAGGAGGTGAGGAGAGG	253	1	n	4.8e-07	+++++++++++ ++
chr3:96905099-96905497	226	GCTTACGTCATCAAGATGCGCCCTAGCCAGCCAATCAGCGGCCGCATTCTCCGTTTGCCTGGAAGGTGAGGGTGG GCAGGGCTGGAAGCCGCTGGGTAGACTCAAAGCAGATGTGTTTCTTCTTAGTAGGCACAAGGAGGTGAGGAGAGG	291	2	y	2.8e-05	+ + +++ +++
chr8:47533403-47533833	1	AGGAATGCGGCCACCGACAAGCAACAGCCCCAGCCGCAGACCGGGCGACAGAAGGCGACACTTCCTTTTCCCCGC CTCCGCTGGCACAGGAAGCACTTCCTGGGCTTGAGTGACAGCACTCCACACCAGTCCTGGAATAGAACGGGTTTC	71	2	n	3.3e-06	++++++ ++ +
chr8:47533403-47533833	1	AGGAATGCGGCCACCGACAAGCAACAGCCCCAGCCGCAGACCGGGCGACAGAAGGCGACACTTCCTTTTCCCCGC CTCCGCTGGCACAGGAAGCACTTCCTGGGCTTGAGTGACAGCACTCCACACCAGTCCTGGAATAGAACGGGTTTC	107	3	y	2e-06	+++ ++++++
chr8:47533403-47533833	151	CTTGTTAGGAAGGTGTTCCATTTCCTAGAGGAGAAAGAGTTGGGGGCGGAAAGAGAAGGAGCCAATAGGAGACGC	209	1	n	1.5e-05	+++++++ ++++
chr8:47533403-47533833	226	GATCGTGAGAAGGGGCGGGGCTTCCTCGGTACCGCCCATCAGTAACTGGTCAGAGGTCTAGGTGTCCCTTAACGT	234	2	y	9.3e-07	++ ++++++++
chr13:44730510-44731419	1	gggAgggcggcccccgcggggaggggactggggggcggggccggcgTGGGGAGTTCCTCGCTCCCGGACCACACG	29	2	y	9.3e-07	++++++++++
chr13:44730510-44731419	151	CGGGGAAGGGGGAGGGGGAAGCGATCGGGGAAAAGGGAGTTGAGTGACAGGAGGCGTGGGGCACGCTGGGAATTG	191	3	y	2e-06	+++ ++++++
chr13:44730510-44731419	751	AAGTTGGGCTGGCTAGCCTCTCTCTCATTGGTTAAGGGGCTTGGAAAAAAGAGACTCGGCGAGCCCTCCGCTGTG	771	1	y	1.1e-06	++++ ++++++++
chr7:4739696-4740267	151	GCTCTTTAAGCCAATGAAAGCACTGATTTGGGACAGTGCAGAAGAAGAGGCGGGACAGATTTTTATGGCAACGCC	158	1	n	4.3e-06	+++++++ + +++
chr7:4739696-4740267	151	GCTCTTTAAGCCAATGAAAGCACTGATTTGGGACAGTGCAGAAGAAGAGGCGGGACAGATTTTTATGGCAACGCC	194	2	y	5.3e-06	++ + ++++++
chr7:4739696-4740267	226	TGAATGACAGCGACCCGAGCCATTGGCTGTAGTTCGCTGGATTTATTGACAGAGTGGGCGTGGAGGGGTTTTGTC	226	3	y	1.1e-05	+++ ++++++
chr7:4739696-4740267	226	TGAATGACAGCGACCCGAGCCATTGGCTGTAGTTCGCTGGATTTATTGACAGAGTGGGCGTGGAGGGGTTTTGTC	268	3	y	7.8e-05	+ ++++++++
chr7:4739696-4740267	301	AGGGCACCGACTGGGGCCAGAAGAGGCGGGAAAAAGAGAGCAATGAGAGTCAGCCAATAAGAACAGCGCGAGTTT	320	2	y	5.3e-06	++ + ++++++
chr7:4739696-4740267	301	AGGGCACCGACTGGGGCCAGAAGAGGCGGGAAAAAGAGAGCAATGAGAGTCAGCCAATAAGAACAGCGCGAGTTT	351	1	n	9.6e-07	++++++++ +++++
chr3:108653795-108654069	1	TGAACTGGTGGTTGGGTAATTGAAAAGCCCTTACTTCAGAGCAGAGGAGCGCGGCCTGGTcccgcccccgcctcc	61	2	n	4.1e-07	+++++++++ +
chr3:108653795-108654069	76	gcccccgcGGCGCAGCCAATCAGCAACGCGCGCGGGAAGGCCGCACAGCTGCGGGCCGAGCGAGTCGATGAGTCC	88	1	n	1.5e-06	+++++++++++ +
chr10:85102335-85102905	1	AGAGCGACTGACAGAGGCCCTGCCCGTCACTCCCTTAGGGCAGCAGCTAAAGGTTGAAGCCCCTGGGCGAAGGAG	5	3	y	3.4e-05	++ ++++++
chr10:85102335-85102905	151	CCCGGAGAGTGGCCGAAGACTCGGGCGAGGCCGGAGGCGCGCGCCTCGCCGGGGCAGCGCCCCCTCGCCTGCTCT GATTGGGTGGCCGGGGCGGAGGGGGCGGGGAGACCCTCCGGATGAGGCGCGCGCGCAGGCTGGCCGGGGGCTGCT	221	1	y	3e-06	+++++++++++ ++
chr10:85102335-85102905	151	CCCGGAGAGTGGCCGAAGACTCGGGCGAGGCCGGAGGCGCGCGCCTCGCCGGGGCAGCGCCCCCTCGCCTGCTCT GATTGGGTGGCCGGGGCGGAGGGGGCGGGGAGACCCTCCGGATGAGGCGCGCGCGCAGGCTGGCCGGGGGCTGCT	244	2	y	9.2e-08	+++++++++++
chr10:85102335-85102905	301	GGGAGGGCTGCGCGCGCCGAGCGACCGGTgggcgcgggaggtgggggggcggagggccgggggcgcgagtgcgcg	335	2	y	2e-05	+++ ++ +++
chr10:85102335-85102905	376	tgcgcgtcggaacccgaggcgcgggaggaggcgggagctccggaggctgcggagggggcgggTCGCGTCAGGCGC	400	2	y	1.1e-06	++++ ++++++
chr10:85102335-85102905	376	tgcgcgtcggaacccgaggcgcgggaggaggcgggagctccggaggctgcggagggggcgggTCGCGTCAGGCGC	427	2	y	9.2e-08	+++++++++++
chr8:46551784-46552176	1	GGGTCCACCCACACCCACACCAGCTCCGGGTCATTTACCCGCCCACGAGGCCGGGGAGTTCTAAATTTACGGAAC	38	2	n	1.5e-05	+++++++ +
chr8:46551784-46552176	151	CCAGGCCTGGATTTCATCGTGCTCTCGCCCAGGACGCTCTCTGGCCCCGCCCCGGAAAAGGCGGAGCATAGCGAG	196	2	n	2.6e-05	++++++++
chr8:46551784-46552176	226	GACTAGGCTCTGATTGGCTGTTCAGAGCAAGACCGGCTAGGCGCGAGTTTGGAGTCCCTGCCTTTGGGAACGGTA	232	1	y	1.4e-08	++++++++++++++
chr10:7667478-7667646	1	CATCCAATCAGAACTGCGCAGGAAGGGGCGGGCCTGAGGAGCGCGCAGTGTGCTTTCTGCTGAACCTTCTTGCTG	1	1	n	1.3e-06	++ +++++++++++
chr10:7667478-7667646	1	CATCCAATCAGAACTGCGCAGGAAGGGGCGGGCCTGAGGAGCGCGCAGTGTGCTTTCTGCTGAACCTTCTTGCTG	22	2	y	9.3e-07	++ ++++++++
chrX:152001771-152002047	1	CACCCTCCTCTGCCGCAACTGCTCCCCGCCCCCGCGACAGCCGCTCCACCTAGTAGGCGGCTCTGCGTCGGCCAA TCAGCGAGAGCATGTGCAAAAGGCACTAAAAGCCCTCCTCTGGTGGCGAGGCTTGTGCAAGATGGCTGCGGCAGT	25	2	n	4.1e-07	+++++++++ +
chrX:152001771-152002047	1	CACCCTCCTCTGCCGCAACTGCTCCCCGCCCCCGCGACAGCCGCTCCACCTAGTAGGCGGCTCTGCGTCGGCCAA TCAGCGAGAGCATGTGCAAAAGGCACTAAAAGCCCTCCTCTGGTGGCGAGGCTTGTGCAAGATGGCTGCGGCAGT	69	1	n	2.6e-06	+++++++++++ +
chr7:27486772-27487196	76	CCACCACCACCAACGAGAGCCGATCCCTGAGCTGCAGGGCGGGGCTGCCACGCGAGTGGGCGGGAACTAGGGATA	108	2	y	4.5e-05	+ +++++++
chr7:27486772-27487196	76	CCACCACCACCAACGAGAGCCGATCCCTGAGCTGCAGGGCGGGGCTGCCACGCGAGTGGGCGGGAACTAGGGATA	129	2	y	1.9e-06	+++ +++++++
chr7:27486772-27487196	226	AGCTAGCGATGCTACGGCAGCCGCTTCCTGATTGGCTGCGTGTGGCTCCCTCTTCGTTCTGATTGGCCGCGAGTG	250	1	y	1.7e-06	+ +++++++++++
chr7:27486772-27487196	226	AGCTAGCGATGCTACGGCAGCCGCTTCCTGATTGGCTGCGTGTGGCTCCCTCTTCGTTCTGATTGGCCGCGAGTG	281	1	y	1.6e-07	++++++++++++++
chr7:24399509-24400108	301	GGAGGACCTTCCCCGCCCACGCTGCACTCCCGTCACTCAGAGCGCGCGCTGCGACCCAGGAACTAATCAGCAGCT	312	2	n	6.1e-06	+++++++ + +
chr7:24399509-24400108	301	GGAGGACCTTCCCCGCCCACGCTGCACTCCCGTCACTCAGAGCGCGCGCTGCGACCCAGGAACTAATCAGCAGCT	330	3	n	1.4e-05	+ ++++ +++
chr7:24399509-24400108	376	GCCCTAGGTAAGGGGAAGGGGGGACGCCCCGAGCCTGGGAGAGGCAGGCGCGCCGACGGGGCGGGGTTGGGGGTG GGGCGTATTCAAGCCCCGCCCCCGCCCTGCCGTTAAAAGGTCGCTGGGCGGCTGGCCAATGGGAGTAGGAACGTG	430	2	y	4.7e-06	++ ++++++++
chr7:24399509-24400108	376	GCCCTAGGTAAGGGGAAGGGGGGACGCCCCGAGCCTGGGAGAGGCAGGCGCGCCGACGGGGCGGGGTTGGGGGTG GGGCGTATTCAAGCCCCGCCCCCGCCCTGCCGTTAAAAGGTCGCTGGGCGGCTGGCCAATGGGAGTAGGAACGTG	442	2	y	1.9e-05	+++++ +++
chr7:24399509-24400108	376	GCCCTAGGTAAGGGGAAGGGGGGACGCCCCGAGCCTGGGAGAGGCAGGCGCGCCGACGGGGCGGGGTTGGGGGTG GGGCGTATTCAAGCCCCGCCCCCGCCCTGCCGTTAAAAGGTCGCTGGGCGGCTGGCCAATGGGAGTAGGAACGTG	465	2	n	4.1e-07	+++++++++ +
chr7:24399509-24400108	376	GCCCTAGGTAAGGGGAAGGGGGGACGCCCCGAGCCTGGGAGAGGCAGGCGCGCCGACGGGGCGGGGTTGGGGGTG GGGCGTATTCAAGCCCCGCCCCCGCCCTGCCGTTAAAAGGTCGCTGGGCGGCTGGCCAATGGGAGTAGGAACGTG	503	1	n	4.3e-06	++++++++ ++++
chr1:153899791-153900085	1	TGAGGCTCCCGCACAGTTCCTCGGCCAATGGCCTCAGGGCCCCGGCGCGCAGCAGCTGATGGGCGCGGGTTTCCT	22	1	n	7.7e-05	++++++++ + +
chr1:153899791-153900085	76	GGCCTAGGTCAGCCAATCAAGGCGACTGGGGGCGGGCACAAGCTGTCAATAAAAAGTACCGAGCAGCCAGCGACC	85	1	n	1.7e-06	++++++++++ ++
chr1:153899791-153900085	76	GGCCTAGGTCAGCCAATCAAGGCGACTGGGGGCGGGCACAAGCTGTCAATAAAAAGTACCGAGCAGCCAGCGACC	101	2	y	1.9e-06	+++++++++
chr1:153899791-153900085	76	GGCCTAGGTCAGCCAATCAAGGCGACTGGGGGCGGGCACAAGCTGTCAATAAAAAGTACCGAGCAGCCAGCGACC	118	3	n	7.8e-05	++++++++ +
chr5:120588549-120589124	76	ccacagcggcagctgcgccagccttcgcatccgccgACTCCTGTCACTCAGCCCCGAAAGCCCCGCCCACGGCCC	116	3	n	2e-06	++++++ +++
chr5:120588549-120589124	76	ccacagcggcagctgcgccagccttcgcatccgccgACTCCTGTCACTCAGCCCCGAAAGCCCCGCCCACGGCCC	137	2	n	1.1e-05	+++++++ +
chr5:120588549-120589124	226	TCACAGCCCTCCTCCCAAAGGGAGGGCGGGGCGAGGAAGCAACACCCCTTTCCTCCCCACCCCACCCCCACCCCC GCCTCACTCGCGCAACCAACAGGAATCCTGCGTCTTTCCATTGGCGAAACGTCAGAGAGGCGGGGATTTTGATTG GCCATCTTTCAGGAGGCGGAGCCAACGCAACCCGATTCGAAGTTAAATGGTGAAAAAGAATGTCAGTCAAACTCA	245	2	y	1.9e-06	+++ +++++++
chr5:120588549-120589124	226	TCACAGCCCTCCTCCCAAAGGGAGGGCGGGGCGAGGAAGCAACACCCCTTTCCTCCCCACCCCACCCCCACCCCC GCCTCACTCGCGCAACCAACAGGAATCCTGCGTCTTTCCATTGGCGAAACGTCAGAGAGGCGGGGATTTTGATTG GCCATCTTTCAGGAGGCGGAGCCAACGCAACCCGATTCGAAGTTAAATGGTGAAAAAGAATGTCAGTCAAACTCA	292	2	n	6.1e-06	+++ +++++ +
chr5:120588549-120589124	226	TCACAGCCCTCCTCCCAAAGGGAGGGCGGGGCGAGGAAGCAACACCCCTTTCCTCCCCACCCCACCCCCACCCCC GCCTCACTCGCGCAACCAACAGGAATCCTGCGTCTTTCCATTGGCGAAACGTCAGAGAGGCGGGGATTTTGATTG GCCATCTTTCAGGAGGCGGAGCCAACGCAACCCGATTCGAAGTTAAATGGTGAAAAAGAATGTCAGTCAAACTCA	334	1	y	4.3e-05	+++ + ++++++ +
chr5:120588549-120589124	226	TCACAGCCCTCCTCCCAAAGGGAGGGCGGGGCGAGGAAGCAACACCCCTTTCCTCCCCACCCCACCCCCACCCCC GCCTCACTCGCGCAACCAACAGGAATCCTGCGTCTTTCCATTGGCGAAACGTCAGAGAGGCGGGGATTTTGATTG GCCATCTTTCAGGAGGCGGAGCCAACGCAACCCGATTCGAAGTTAAATGGTGAAAAAGAATGTCAGTCAAACTCA	354	2	y	1.9e-05	+ + ++++++
chr5:120588549-120589124	226	TCACAGCCCTCCTCCCAAAGGGAGGGCGGGGCGAGGAAGCAACACCCCTTTCCTCCCCACCCCACCCCCACCCCC GCCTCACTCGCGCAACCAACAGGAATCCTGCGTCTTTCCATTGGCGAAACGTCAGAGAGGCGGGGATTTTGATTG GCCATCTTTCAGGAGGCGGAGCCAACGCAACCCGATTCGAAGTTAAATGGTGAAAAAGAATGTCAGTCAAACTCA	366	1	y	3e-06	++ ++++++++++
chr5:120588549-120589124	226	TCACAGCCCTCCTCCCAAAGGGAGGGCGGGGCGAGGAAGCAACACCCCTTTCCTCCCCACCCCACCCCCACCCCC GCCTCACTCGCGCAACCAACAGGAATCCTGCGTCTTTCCATTGGCGAAACGTCAGAGAGGCGGGGATTTTGATTG GCCATCTTTCAGGAGGCGGAGCCAACGCAACCCGATTCGAAGTTAAATGGTGAAAAAGAATGTCAGTCAAACTCA	435	3	n	3e-05	+++++ +++
chr5:120588549-120589124	451	AAGTCCCGCCTTCTAAGAGTGGCTCGTAACCTAGCAACATAAGGGCCGCCGAGTTGCTTAACTGTGGGCCAAGAA	455	2	n	1.9e-05	++++++ ++
chr5:120588549-120589124	526	ACTTGCATCTTGAGGAGCTGGTGAGTGACAGCGGGGAAGCCCCAGGCTGC	547	3	y	2e-06	+++ ++++++
chr13:13590180-13590543	1	GAAGCTGCACAGGGCCCTCCTCGCTGCATTTGTCCCGCCTTCTTCCTCTCATTGGCTGAGATTCTCCACGCATCA	34	2	n	2e-05	++++++ ++
chr13:13590180-13590543	1	GAAGCTGCACAGGGCCCTCCTCGCTGCATTTGTCCCGCCTTCTTCCTCTCATTGGCTGAGATTCTCCACGCATCA	45	1	y	4.1e-07	+++++ ++++++++
chr13:13590180-13590543	76	CGTCGGCGACCCCAGCGTGCCCTCCCGGTGGGGCGGGACTTTAGGCGCTCGAGGCGGGGACGGTGCGCACGCGCA	102	2	y	5.3e-06	++ ++++++++
chr13:13590180-13590543	76	CGTCGGCGACCCCAGCGTGCCCTCCCGGTGGGGCGGGACTTTAGGCGCTCGAGGCGGGGACGGTGCGCACGCGCA	123	2	y	5.4e-05	+ ++++++
chr13:13590180-13590543	151	GAGGAGCGGGTCTGGGTCTGGGCGGGGGAGGAAGGGGGTGGTGTTCCCGGTTTCCCGGGTTACCTGAGGGGGCGG GGGTGAGAGCTCACGCTGGCCTGGCAGCCTTGGTGAGTCGGGATTCTCCTGCACCGGCGGGCGAGAGCGCGCGGC	166	2	y	4.8e-05	+ +++++++
chr13:13590180-13590543	151	GAGGAGCGGGTCTGGGTCTGGGCGGGGGAGGAAGGGGGTGGTGTTCCCGGTTTCCCGGGTTACCTGAGGGGGCGG GGGTGAGAGCTCACGCTGGCCTGGCAGCCTTGGTGAGTCGGGATTCTCCTGCACCGGCGGGCGAGAGCGCGCGGC	216	2	y	9.2e-08	+++++++++++
chr15:100422941-100423358	76	CGGCGACCCAGTCAACCTCCTGCCCTCCCGTGATTGGCCGGCCGGGCGGGAGCCCCCCTCTCCTGATTGGCTGGA	102	1	y	8.3e-06	++ ++++++++++
chr15:100422941-100423358	76	CGGCGACCCAGTCAACCTCCTGCCCTCCCGTGATTGGCCGGCCGGGCGGGAGCCCCCCTCTCCTGATTGGCTGGA	135	1	y	9.6e-07	++ +++++++++++
chr15:100422941-100423358	151	CTCCTGCAGCTGCGGGATTGCGTGGCCGGCGGACCGGGAACGGAGGCTCCGCCCATCCGAGCTGCCTGGGGGCGG GGCCTGAGCGGGGGCGGGGCTGATCCGGAGGCGTGATTCCGCCGGGCGCGCCACGGTCCTCGCAGTTCAAACCTT	216	2	y	1.9e-06	+++++++++
chr15:100422941-100423358	151	CTCCTGCAGCTGCGGGATTGCGTGGCCGGCGGACCGGGAACGGAGGCTCCGCCCATCCGAGCTGCCTGGGGGCGG GGCCTGAGCGGGGGCGGGGCTGATCCGGAGGCGTGATTCCGCCGGGCGCGCCACGGTCCTCGCAGTTCAAACCTT	233	2	y	4.1e-07	+ +++++++++
chrX:140456494-140456789	1	TTGGGCGGCAACATTACCGGAAGACTCCGCCCCTCACACCCGTCCAACCAATCAGAAAAGGCTGGGTGGAGAACT	45	1	n	8.2e-07	+++++++++++++
chrX:140456494-140456789	76	TCCTTTGTAATCCCGCCCCCTGGGCAATTTAATGCCGCGCGCTGGGCGGGAATGTAAGATGGCGGAGTAGCAACG	87	2	n	2.6e-07	++++++++++
chrX:140456494-140456789	76	TCCTTTGTAATCCCGCCCCCTGGGCAATTTAATGCCGCGCGCTGGGCGGGAATGTAAGATGGCGGAGTAGCAACG	115	2	y	4.2e-05	+ +++++++
chr8:18846133-18846710	1	TCTTCCCGGGCTCATCCCCAGCCAGCATTCGCAGTCGAGCATGCGTCGTGACGAGGCCAAGGGACCGAGCCAATC AGAACACGTATTACGCCCATAAGTCGGCCAATCAGGAGGCGCCTTATTACCCGGGAGCCTTGCTTCACCCCGCCT CCCCGCTGACAAGCACGGGTCGCGCGGAGCAAAGCGAGCACCCCGAGGCGAGTGCGCCCGGCAAGCCGAGGCGTG	67	1	n	2.4e-07	+++++++++++++
chr8:18846133-18846710	1	TCTTCCCGGGCTCATCCCCAGCCAGCATTCGCAGTCGAGCATGCGTCGTGACGAGGCCAAGGGACCGAGCCAATC AGAACACGTATTACGCCCATAAGTCGGCCAATCAGGAGGCGCCTTATTACCCGGGAGCCTTGCTTCACCCCGCCT CCCCGCTGACAAGCACGGGTCGCGCGGAGCAAAGCGAGCACCCCGAGGCGAGTGCGCCCGGCAAGCCGAGGCGTG	100	1	n	2.6e-06	+++++++++++ ++
chr8:18846133-18846710	1	TCTTCCCGGGCTCATCCCCAGCCAGCATTCGCAGTCGAGCATGCGTCGTGACGAGGCCAAGGGACCGAGCCAATC AGAACACGTATTACGCCCATAAGTCGGCCAATCAGGAGGCGCCTTATTACCCGGGAGCCTTGCTTCACCCCGCCT CCCCGCTGACAAGCACGGGTCGCGCGGAGCAAAGCGAGCACCCCGAGGCGAGTGCGCCCGGCAAGCCGAGGCGTG	144	2	n	1.5e-06	++++++ ++++
chr8:18846133-18846710	301	ggagccagggcggagggcggcggcgcggccggccccgcgcAGTGATTGGCGGGCGGCCGGCGGTGGCTGAGGTCC	343	3	y	3.3e-05	++++++ + +
chr8:18846133-18846710	451	ACGTACTCTATGCGCTACCTGCTCCCCAGCGTCCTGTTGCTGGGCTCGGCGCCCACCTACCTGCTGGCCTGGACG	502	2	n	7.1e-05	+++ ++ ++
chr8:18846133-18846710	526	CTGTGGCGGGTGCTCTCCGCGCTGATGCCCGCCCGCCTGTACCAGCGCGTGG	553	2	n	5.7e-05	+++++++ ++
chr11:69059498-69059883	1	GGCGCTCCGGGGCTCGGGTCTTTTAAGACCCGCCCCCTCAACTTTCCGAAGGGGCGGGGCCCCGCGCACAGCTGT	29	2	n	9.2e-08	+++++++++++
chr11:69059498-69059883	1	GGCGCTCCGGGGCTCGGGTCTTTTAAGACCCGCCCCCTCAACTTTCCGAAGGGGCGGGGCCCCGCGCACAGCTGT	48	2	y	9.3e-07	++ ++++++++
chr11:69059498-69059883	151	TGGGGTGGCGACCAATCACAGAGCTCTTCCTGTCCGGACCATTATCATCCGGCTGCCAATCGGCGCGCCTCCGCC	159	1	n	7.5e-06	++++++++++ ++
chr11:69059498-69059883	151	TGGGGTGGCGACCAATCACAGAGCTCTTCCTGTCCGGACCATTATCATCCGGCTGCCAATCGGCGCGCCTCCGCC	203	3	n	6e-05	+++ +++++
chr11:69059498-69059883	226	AACGCCCCTTAAAGGCGCCGCCGCTGACCGGGGAGCCCGGCGGACGACTCGCGGTTCCGGCCCCCACCCTCAGTA	288	2	n	4.2e-05	+++ +++ +
chr2:27539930-27540569	151	AAGTAAAAACGGTTTATTTATTTCAAACCCGACACGCTTTAATTAATTCATAAAACTAGCCAATCACAGGCCTAA	163	4	y	8.7e-05	++ ++++++
chr2:27539930-27540569	151	AAGTAAAAACGGTTTATTTATTTCAAACCCGACACGCTTTAATTAATTCATAAAACTAGCCAATCACAGGCCTAA	207	1	n	2.8e-07	++++++++++ +++
chr2:27539930-27540569	301	ACCGGGACACGCTTGCGGACGGCGGGAAGTGGAAGTGGGCGGGCACGAATCAGAGGACGAGCGCCTGTTAATCCT	333	2	y	7.7e-06	++ +++++++
chr2:27539930-27540569	451	TCGGCTCCCGCCACCGTGTCTCCGCATGCGCAGCGAAGGCTGGCTACACGTCAGCTGTCGCTCAGGATTCGAGGA	505	3	n	4.1e-05	+++++ +++
chr5:137684620-137685102	1	TTAACCGCTCGCTGCCTTTCCCGCCTCCGCCGCCTTCGCACGCCCGGCAACCCTGACACCAGCTCCTGCAGCCCC	20	2	n	3.3e-06	++++++ ++ +
chr5:137684620-137685102	76	GACCACGACCGCGAGAGACTCTGCCGCCCCCTTCCTCGTCCTGTTCGGCACGCTGATTGGCTAGTCTCCCCCCAC CTCCTTGCTTTAATTGGTTCGATTCGAGACGGCCTCCGGTTGCTGGAGCCTTCAGAACCACGCCCCACTGCCACC	125	1	y	5.9e-07	+ +++++++++++
chr5:137684620-137685102	76	GACCACGACCGCGAGAGACTCTGCCGCCCCCTTCCTCGTCCTGTTCGGCACGCTGATTGGCTAGTCTCCCCCCAC CTCCTTGCTTTAATTGGTTCGATTCGAGACGGCCTCCGGTTGCTGGAGCCTTCAGAACCACGCCCCACTGCCACC	146	2	n	2.4e-05	+++ ++ +++
chr5:137684620-137685102	76	GACCACGACCGCGAGAGACTCTGCCGCCCCCTTCCTCGTCCTGTTCGGCACGCTGATTGGCTAGTCTCCCCCCAC CTCCTTGCTTTAATTGGTTCGATTCGAGACGGCCTCCGGTTGCTGGAGCCTTCAGAACCACGCCCCACTGCCACC	157	1	y	8.5e-05	+++ + +++++++
chr5:137684620-137685102	226	CGGCCTTCTGTCTTTTCCATTGGTTCACAAAGACCCCCACCTTGCAAGTACAATGCGTGCCCTCCTCCTTGTCCC CGCCCCCTCTCGCCACGGACTCCTATGCTGACTCTGATTGGTTGTTAAGGTTGCAAAATTAGCGTGCGAGAGAAA	238	1	y	4.6e-05	++ + +++++++
chr5:137684620-137685102	226	CGGCCTTCTGTCTTTTCCATTGGTTCACAAAGACCCCCACCTTGCAAGTACAATGCGTGCCCTCCTCCTTGTCCC CGCCCCCTCTCGCCACGGACTCCTATGCTGACTCTGATTGGTTGTTAAGGTTGCAAAATTAGCGTGCGAGAGAAA	299	2	n	9.2e-08	+++++++++++
chr5:137684620-137685102	226	CGGCCTTCTGTCTTTTCCATTGGTTCACAAAGACCCCCACCTTGCAAGTACAATGCGTGCCCTCCTCCTTGTCCC CGCCCCCTCTCGCCACGGACTCCTATGCTGACTCTGATTGGTTGTTAAGGTTGCAAAATTAGCGTGCGAGAGAAA	331	1	y	6.8e-07	+++++++++++++
chr7:81571165-81571927	1	AAAGACTTTCCATTGGCTTTCACTTAACCAACTCCAGACAGCCTCCCTCACACAGCCTATCAGAATGAGGGGGCG GGAGCTTCTGCGCCTCTGACTGACAGTAGCGGCTCCCGGAAAATGTCGTGGCCTGTCGCAGTCTAAGGGTGTGCG	6	1	y	2.1e-05	+++ + +++++++
chr7:81571165-81571927	1	AAAGACTTTCCATTGGCTTTCACTTAACCAACTCCAGACAGCCTCCCTCACACAGCCTATCAGAATGAGGGGGCG GGAGCTTCTGCGCCTCTGACTGACAGTAGCGGCTCCCGGAAAATGTCGTGGCCTGTCGCAGTCTAAGGGTGTGCG	67	2	y	9.2e-08	+++++++++++
chr7:81571165-81571927	1	AAAGACTTTCCATTGGCTTTCACTTAACCAACTCCAGACAGCCTCCCTCACACAGCCTATCAGAATGAGGGGGCG GGAGCTTCTGCGCCTCTGACTGACAGTAGCGGCTCCCGGAAAATGTCGTGGCCTGTCGCAGTCTAAGGGTGTGCG	92	3	y	2.9e-06	+++ ++++++
chr19:44266963-44267312	76	AGTCGCGGCCCATCACTCAGAGCCCCCAGGGTCACACCCGTCCACTCGGCCCACAGCGCCTGACTCCGCACAGCC AATCAGCAGCCGCGCTGCGACTCTGCCCGAGTCCGCGCCCATCAGGAGGCGCCGCCTCTGGTTCGGGAGGTGCCC	85	3	n	8.4e-05	+ +++ +++
chr19:44266963-44267312	76	AGTCGCGGCCCATCACTCAGAGCCCCCAGGGTCACACCCGTCCACTCGGCCCACAGCGCCTGACTCCGCACAGCC AATCAGCAGCCGCGCTGCGACTCTGCCCGAGTCCGCGCCCATCAGGAGGCGCCGCCTCTGGTTCGGGAGGTGCCC	146	1	n	8.2e-07	+++++++++++ ++
chr19:44266963-44267312	226	CTGCATCTTGCGGTCGCCCTCCTGTTTGGAGCTGAGGGAGTTTCTAAGGGATGCTGTAACTACCCTCCACCCCCG CCCCCCAGTCCTCCCTCTCCGCCAGGGAGGAACGCAGAGACCTTGGGTG	297	2	n	9.3e-07	++++++++++
chr5:145204052-145204678	151	CTGCGGTGGGTGGGTGGGTGAGGCTGTGCTCGACCAATCAGAGGAGAGAGAGGGTGGACCTATTTTGTTTGTTTG	158	2	y	1.7e-05	+++ +++ +++
chr5:145204052-145204678	151	CTGCGGTGGGTGGGTGGGTGAGGCTGTGCTCGACCAATCAGAGGAGAGAGAGGGTGGACCTATTTTGTTTGTTTG	181	1	n	8.2e-07	++++++++++++++
chr5:145204052-145204678	226	TTTTCCCCGACCGGCCCCCTAGATTCCTACCCTTGAGCTAAGCCCATGCTCTGGTTTTGGGGGTGGGAAATAGAT	282	2	y	1.9e-05	+++++ +++
chr5:145204052-145204678	301	TAGCTCTATTTTCCCCAGGCTCTTGTAGCCTCTTGCTTGAGGGTGACTGATTGGTCAGCTCCACAAGGGGGCGGG	365	2	y	7.3e-07	++++++++++
chr5:145204052-145204678	376	CTCAGGAGTAGCTCCTCCTTCCCGCTGTGCTGCTAGGACCTCCGGGATTCCTAGAGAGGCTGCGGAAGCGCTCTT GGGGGTGGGATTTATGGCTGAAGCTCGTACTTGGTTACTTCCGGCGATGAACTGTTGGAAAGTGTCGGACTTGCC	449	2	y	1.9e-05	+++++ +++
chr1:52233124-52233611	76	CCGCCGCGAGCTCCGCACTGAGACTGACGCTCAAGGGAGGGCTGGAGACATACCAGGCTCACCAACCGGGGGCGG GAGGACGCTGACGGCCTGCCCCCTGCAAGCTCTTCCATTGGCTCAGCCTGCCGACCTCTCTTCTGATTGGCTAGA	141	2	y	1.5e-06	+++++++++
chr1:52233124-52233611	76	CCGCCGCGAGCTCCGCACTGAGACTGACGCTCAAGGGAGGGCTGGAGACATACCAGGCTCACCAACCGGGGGCGG GAGGACGCTGACGGCCTGCCCCCTGCAAGCTCTTCCATTGGCTCAGCCTGCCGACCTCTCTTCTGATTGGCTAGA	181	1	y	2.3e-05	++ + +++++++
chr1:52233124-52233611	76	CCGCCGCGAGCTCCGCACTGAGACTGACGCTCAAGGGAGGGCTGGAGACATACCAGGCTCACCAACCGGGGGCGG GAGGACGCTGACGGCCTGCCCCCTGCAAGCTCTTCCATTGGCTCAGCCTGCCGACCTCTCTTCTGATTGGCTAGA	210	1	y	3.1e-08	++++++++++++++
chr1:52233124-52233611	226	GAATCGGTCAAATTTGTCTCCGCGCCCGTACGCAGTCCCGCTGGGTCCTGGAGGGCGGGGAGAAGGACGACTGAC	274	2	y	6.8e-06	++ +++++++
chr14:55015115-55015604	76	GTGGAAAGACTGTCTCTGCGGCATCTGGGAGCCAATGAGCTCTCGGGCTGCATAACTAATTTCTTTTTTCTACTG	104	1	n	2.3e-05	+++++++ ++ +
chr14:55015115-55015604	151	GTTGCACTAGCTGTCAATCAATAATCTGCACAATATTTATTGGAATTAGCATCCATCATTCTCTGTAAATCACGA	161	3	n	1.1e-06	++++++++++
chr14:55015115-55015604	151	GTTGCACTAGCTGTCAATCAATAATCTGCACAATATTTATTGGAATTAGCATCCATCATTCTCTGTAAATCACGA	213	3	n	9.6e-06	++++ +++++
chr14:55015115-55015604	226	ATCACATGCTTCTGTCCCCGCCCACCTTTACGCCTTAAGAACGCCTCTGCGTTTGACACATTCAGGGAGTTTCTT	242	2	n	9.5e-06	+++++++ ++
chr14:55015115-55015604	301	TATTTCATTGGCTAGGTGAGGTCCCGCCTCTCCGATTAGCGGAAATGAAAGATCTCTTACTTCCATTGGCTGAAA	301	1	y	1.6e-05	+ + ++++++++
chr14:55015115-55015604	301	TATTTCATTGGCTAGGTGAGGTCCCGCCTCTCCGATTAGCGGAAATGAAAGATCTCTTACTTCCATTGGCTGAAA	323	2	n	6.8e-06	++++++ + ++
chr14:55015115-55015604	301	TATTTCATTGGCTAGGTGAGGTCCCGCCTCTCCGATTAGCGGAAATGAAAGATCTCTTACTTCCATTGGCTGAAA	359	1	y	1.2e-05	++ + ++++++++
chr14:55015115-55015604	376	TTTGCAAACTGTGATTGTCTATCAAAACTATGAACTCACGCTAGCTCCTAGGAAGTTCGGGCCCGGAAAGGGTGG GCTTTGCGAAGATGGCGGCTCCGGTGAGTTCTGTCTCCT	441	2	y	3e-05	++ +++ +++
chr6:29916925-29917196	1	GGGGCCTCGGAGAGTAGTTACAGCCAATCGGAGTTCAGGGGGCGGGGCCTGGTCCCGGGCGCGCGCTGTGGCGGG	21	1	n	8.2e-07	+++++++++++++
chr6:29916925-29917196	1	GGGGCCTCGGAGAGTAGTTACAGCCAATCGGAGTTCAGGGGGCGGGGCCTGGTCCCGGGCGCGCGCTGTGGCGGG	36	2	y	2.6e-07	++++++++++
chr4:42949704-42950052	76	ACGCTCGTTGAGAGGTATCCAATCACAGAAGAGTCTGAGCTGAGTGACGGATAGACCGGGCAATGGGAAGCGCGG	91	1	n	7.5e-06	++ +++++++ ++
chr4:42949704-42950052	76	ACGCTCGTTGAGAGGTATCCAATCACAGAAGAGTCTGAGCTGAGTGACGGATAGACCGGGCAATGGGAAGCGCGG	116	3	y	1.4e-05	+++ ++++ +
chr4:42949704-42950052	151	AGGCGGAGCCGTGGGGGCGGGCTCCCGGTCCCGCTGTCTGCGGCCGGCGGGCAGGCGACTCCTGTCCCGAGTGGA	161	2	y	7.3e-07	+ +++++++++
chr17:84957152-84958126	76	TGCCAAAGAGAGGCGGCCACTTCTTCCAATGAGGGTCTAGGGGCACTTCTCTGGCCAATCAGAAGCCGGCTCTCT	127	1	n	1.6e-07	++++++++++++++
chr17:84957152-84958126	376	GAAGCCAATAGTCGGAGGATCAGGCCGCCATTTGAACCAATCAGAAAAGGATATCGGTCTTCGAGTTGGGGCGTA	409	1	n	3e-06	++++++++++++
chr17:84957152-84958126	451	ATTTGACTGACGGAGGACTCTACCTATGGCTACTAGGGTGGGCAGGTCGGTGACGTCAGGAGTTAGGGCAAGGCG GAGGTGGGGCTGAATAAAGTAAATGGTAATGAAGGGTTGGGCCTCACTGGTGGGCGGTGTGTGATGGATAGTTGA	454	3	y	1.6e-05	+++ ++++ +
chr17:84957152-84958126	451	ATTTGACTGACGGAGGACTCTACCTATGGCTACTAGGGTGGGCAGGTCGGTGACGTCAGGAGTTAGGGCAAGGCG GAGGTGGGGCTGAATAAAGTAAATGGTAATGAAGGGTTGGGCCTCACTGGTGGGCGGTGTGTGATGGATAGTTGA	523	2	y	2e-05	+ ++ ++ +++
chr17:84957152-84958126	451	ATTTGACTGACGGAGGACTCTACCTATGGCTACTAGGGTGGGCAGGTCGGTGACGTCAGGAGTTAGGGCAAGGCG GAGGTGGGGCTGAATAAAGTAAATGGTAATGAAGGGTTGGGCCTCACTGGTGGGCGGTGTGTGATGGATAGTTGA	587	3	y	8.4e-05	++++ ++ ++
chr17:84957152-84958126	601	CCTTGCCAATTAAGGTGGGCACTGACGCCCAATGAGAAATTAAAGACTCAGAGGCGGGGCCGTGTGGGCGGGGAA	626	1	n	4.3e-05	++ +++++ ++++
chr17:84957152-84958126	601	CCTTGCCAATTAAGGTGGGCACTGACGCCCAATGAGAAATTAAAGACTCAGAGGCGGGGCCGTGTGGGCGGGGAA	648	2	y	2.8e-05	+ ++++++
chr17:84957152-84958126	601	CCTTGCCAATTAAGGTGGGCACTGACGCCCAATGAGAAATTAAAGACTCAGAGGCGGGGCCGTGTGGGCGGGGAA	662	2	y	7.7e-06	+ + +++++++
chr17:84957152-84958126	676	AGAGAAGCACAGAAGATACTAGGGGCCAGGTTGGGCGGGAGAACGTAGATTGACAGGCTTCTCAGCAAACCGAGG	704	2	y	2.6e-05	++ +++++++
chr17:84957152-84958126	676	AGAGAAGCACAGAAGATACTAGGGGCCAGGTTGGGCGGGAGAACGTAGATTGACAGGCTTCTCAGCAAACCGAGG	722	3	y	2.3e-05	+++++++++
chr17:84957152-84958126	751	GCAGCGGTGACACACGCGGCGTCCCAATGGGTGCCCTTGGggggcggagcccgaggaggggcggggaaagacggc	805	2	y	1.2e-06	++ ++++++++
chr10:80329784-80330223	1	CCGCCTCCTTTCTGGTCTGTCCAATCAGCGCTGATCTTTACCAGGCTCCGCCCATCTGTTCCTCAACTAGCTCCA	18	1	n	4.8e-06	++ ++++++++ ++
chr10:80329784-80330223	76	CCCACGTCAATCGCTCTCCGTCAATAATCTACCGCTTGTCCAATCACTATCGTGCCACACCCTCTTGACCAATCA ACACGCCATCACCCTGGGGCCCCGCCCCCTCGGGACTCCTCGCTGCCGCCCCGGCCCTCACCCTGGCCAGAGGGC	112	1	n	9e-05	++ +++++++ +
chr10:80329784-80330223	76	CCCACGTCAATCGCTCTCCGTCAATAATCTACCGCTTGTCCAATCACTATCGTGCCACACCCTCTTGACCAATCA ACACGCCATCACCCTGGGGCCCCGCCCCCTCGGGACTCCTCGCTGCCGCCCCGGCCCTCACCCTGGCCAGAGGGC	141	1	n	6.7e-06	++++++++++ ++
chr10:80329784-80330223	76	CCCACGTCAATCGCTCTCCGTCAATAATCTACCGCTTGTCCAATCACTATCGTGCCACACCCTCTTGACCAATCA ACACGCCATCACCCTGGGGCCCCGCCCCCTCGGGACTCCTCGCTGCCGCCCCGGCCCTCACCCTGGCCAGAGGGC	171	2	n	9.2e-08	+++++++++++
chr10:80329784-80330223	226	CATGCGGCCGGGGAGACGGGGCAGGCCCCACCTCCTTTGTCCGCCCTGCCCTCCCATTGGCCAGAGCCGgggggc gggggcggagccagggtccggggccgaaagcactgggccgggggcggggccgggcggtgggcgggTGGTGAAAGT	252	2	n	2.4e-05	+++ ++ +++
chr10:80329784-80330223	226	CATGCGGCCGGGGAGACGGGGCAGGCCCCACCTCCTTTGTCCGCCCTGCCCTCCCATTGGCCAGAGCCGgggggc gggggcggagccagggtccggggccgaaagcactgggccgggggcggggccgggcggtgggcgggTGGTGAAAGT	275	1	y	2e-06	+++++ ++++++++
chr10:80329784-80330223	226	CATGCGGCCGGGGAGACGGGGCAGGCCCCACCTCCTTTGTCCGCCCTGCCCTCCCATTGGCCAGAGCCGgggggc gggggcggagccagggtccggggccgaaagcactgggccgggggcggggccgggcggtgggcgggTGGTGAAAGT	293	2	y	4.1e-07	++++++++++
chr10:80329784-80330223	226	CATGCGGCCGGGGAGACGGGGCAGGCCCCACCTCCTTTGTCCGCCCTGCCCTCCCATTGGCCAGAGCCGgggggc gggggcggagccagggtccggggccgaaagcactgggccgggggcggggccgggcggtgggcgggTGGTGAAAGT	338	2	y	1.5e-06	+++++++++
chr10:80329784-80330223	226	CATGCGGCCGGGGAGACGGGGCAGGCCCCACCTCCTTTGTCCGCCCTGCCCTCCCATTGGCCAGAGCCGgggggc gggggcggagccagggtccggggccgaaagcactgggccgggggcggggccgggcggtgggcgggTGGTGAAAGT	355	2	y	6.1e-06	++ +++++++
chr19:61140776-61141069	1	AAGACTGCTCAGTCTCAGAGCGGAACTTGCTGCTCGACACCCGGATGAATCCTCCTCCTTTTCTGACTGGCAGGT	64	3	y	2.4e-05	+++ ++ +++
chr19:61140776-61141069	76	CCATCTGAAGCCTCTGATTGGCCAGTGAGTCTTGTGTGACTTGAGCACCTCCCTTAGGGTAAGAGCGTGCTGACG	86	1	y	8.5e-08	++++++++++++++
chr19:61140776-61141069	226	TTCAGTAGCACTTGTGCCTGTCCTCCAATATCCTACCTGTCTGTCTTCCCACCCAGCCCCGCGGGAGG	273	2	n	7.1e-05	+++ +++ ++
chr17:87446721-87447397	226	GGAACCTAGCGAACGAGTCCCGGCCAGCCCCCGCCCCCTCCCCCCCCCCAACTCTCCGGGAGACCCCCTTTCTCC	255	2	n	9.2e-08	+++++++++++
chr17:87446721-87447397	451	TCGACCAGGCGAACCTCGTTGAGCTTGCTGCTGATTGGCTGATTTGTACCTGCAATGCGTCACTTTCTCTCGCAG	478	1	y	8.2e-07	++ +++++++++++
chr11:73176962-73177345	76	GGTTTGCGCAGGCGCACAAACTCCGCCCCACCCTCCTACGCTTGCGCCTCGGGCGCTCTCCCCTCCCGCCCCACT	102	2	n	3.2e-05	+++ +++ ++
chr11:73176962-73177345	76	GGTTTGCGCAGGCGCACAAACTCCGCCCCACCCTCCTACGCTTGCGCCTCGGGCGCTCTCCCCTCCCGCCCCACT	140	2	n	1.5e-05	++++++++ +
chr11:73176962-73177345	151	TCAGCACACAAGTCCCGGGACTCCGGAAAGCCCAACAGCGCTCCAGATGCTGATTGGCTAGAGACTTCTTAAGTA	197	1	y	9.6e-07	+ +++++++++++
chr11:73176962-73177345	226	TTCATGAGGGGGCGGGCTGAGCAGGGCTGCCCTTTGTTAACCAGGGAGGGCGCGGCCGCGGGCATTCTCGCTGGG	231	2	y	9.2e-08	+++++++++++
chr6:100287410-100287708	76	GTGACTGACGAggggcggggccgggcgccgcgcgTCACGCGCCGGGCAACCAATAAGAGGACGACGACCGGCGCC	84	2	y	2.8e-06	+ ++++++++
chr6:100287410-100287708	76	GTGACTGACGAggggcggggccgggcgccgcgcgTCACGCGCCGGGCAACCAATAAGAGGACGACGACCGGCGCC	122	1	n	3.4e-06	++++++++ +++++
chr6:100287410-100287708	151	GCGggggcggggcgtagcgcgcgggagggcggggcgccgcgggggggcggggcggccggcgtgcgtgcccgggag	151	2	y	4.1e-07	+ +++++++++
chr6:100287410-100287708	151	GCGggggcggggcgtagcgcgcgggagggcggggcgccgcgggggggcggggcggccggcgtgcgtgcccgggag	173	2	y	1.9e-06	+++ +++++++
chr6:100287410-100287708	151	GCGggggcggggcgtagcgcgcgggagggcggggcgccgcgggggggcggggcggccggcgtgcgtgcccgggag	191	2	y	1.7e-07	+++++++++++
chr6:100287410-100287708	226	tgtgtgtgcgcgcggggggcgcgcgtgcctgccggtggCCCCCGCGGCCCCGGCGCGTCTGAGCGTGCGAGCC	238	2	y	8.8e-05	++++++++ +
chr7:41393137-41393639	151	GAAAAACAATCAGAACTTTTCCAGCAGGGTCCGTTATAGAGCTGAAACTGCCGCAAGGAACCCGGAAGGTCCCGC CTTCTCTCCTGACTGACAAATCCACCCCAAGGCTCCGATTGGTCACTAAGTCTTGCGTAACATGAACAGCTCCAC	221	2	n	7.7e-06	++++++ +++
chr7:41393137-41393639	151	GAAAAACAATCAGAACTTTTCCAGCAGGGTCCGTTATAGAGCTGAAACTGCCGCAAGGAACCCGGAAGGTCCCGC CTTCTCTCCTGACTGACAAATCCACCCCAAGGCTCCGATTGGTCACTAAGTCTTGCGTAACATGAACAGCTCCAC	235	3	y	6.6e-05	+++ +++++
chr7:41393137-41393639	151	GAAAAACAATCAGAACTTTTCCAGCAGGGTCCGTTATAGAGCTGAAACTGCCGCAAGGAACCCGGAAGGTCCCGC CTTCTCTCCTGACTGACAAATCCACCCCAAGGCTCCGATTGGTCACTAAGTCTTGCGTAACATGAACAGCTCCAC	257	1	y	5.9e-07	++++++++++++++
chr7:41393137-41393639	301	CTCAAGGTTCTGATTGGCCATTAAACCTCCCTTAGGGTTAGAATGTGCAGATGGGACTCCGCTTGGTTGCTGGCC	307	1	y	5e-08	++++++++++++++
chr13:119690058-119690549	1	CCAGGAGTGGGACGCCGAGTCGCCATTGGTCTCTATCTCCTCTCACTGACCTTCAATTGGTCGGAGAACCTCTCA	19	1	y	8.5e-05	++ + +++++++
chr13:119690058-119690549	151	CCGTCTCACCCCACTTCCCAGGTCCTCGGACTTTGTTCCCACCCCTTACCCCGCCCTTCCGGCAGCGAGGGAAAA	188	2	n	2e-05	+++ ++++ +
chr13:119690058-119690549	151	CCGTCTCACCCCACTTCCCAGGTCCTCGGACTTTGTTCCCACCCCTTACCCCGCCCTTCCGGCAGCGAGGGAAAA	200	2	n	8.5e-06	+++++++ ++
chr13:119690058-119690549	226	CCCTAGCGAGTCCCCGCCTCTCATTGGCTGAAAGCGGATCGGGGGGCGGGCGCTCCCGAGCGACTCTGAGTCCCG	242	1	y	4.1e-07	+++++ ++++++++
chr13:119690058-119690549	226	CCCTAGCGAGTCCCCGCCTCTCATTGGCTGAAAGCGGATCGGGGGGCGGGCGCTCCCGAGCGACTCTGAGTCCCG	265	2	y	4.1e-07	++++++++++
chr13:119690058-119690549	301	GGATTGGCAGAGGTAGCCGCTGTCCCGCCCTCTGTCCCCTCCCGGCGCTGCCCGAGTCGGGTGGGTCGGTGGCTA	324	2	n	3.3e-06	+++++++ ++
chr13:119690058-119690549	376	TAAAGCTGCGGAGGGCGGGAGGCACAGTCTGCGGTCTCCTTGCTTTGCTCGTTCTTCTTCCAGGGTCTGATCCCC	384	2	y	4.7e-06	++ +++++++
chr11:103966375-103966872	1	TGGGTTGGTCAGAATGCTCCCCGGGTTAGTTCAATCCGTGAAAAGTACCAGAGTTGATTGGCAGGGCAAATAGAA	55	3	y	6e-06	++++++ +++
chr11:103966375-103966872	76	AACCCTTTTGCTTTTCTGATTGGTCGTCTGTGGCTTCGGGTGGGGCATGTGGGCGCGTCTCTCCCGAATGCGGTG	88	1	y	2.3e-06	+++++++++++++
chr11:103966375-103966872	226	TCCCGTCCAGCCTTATTGCCATTTCCATTGGTCAGATTTTTTGTCATTCAAGTAACTTCGCGGACATAGGCGCAA	246	1	y	3.3e-05	++ + ++++++++
chr11:103966375-103966872	301	GAGTTCCCAGGAGGCGGCGGATGATTGGTTGGTTGCTGTTCCCGCCCCCAGCCAGTCGCCATTTTATTGAGGCAA	341	2	n	1.9e-06	+++++++++
chr4:46489152-46489491	1	AGAGGCGTAGGCAGCGCTGGAGGGGCGGGGCTTGCTTTTCTCCCCGCTCTCTGCAGAGGTAAGGCTCCGATTGGC TGTCGAGCGAGACGGGGCCCGCGGATTGGCTGCGCGACAGCCGCCGGCTGACGTGGCGGGGCTGAGACCTGCGGG	19	2	y	1.2e-06	++ ++++++++
chr4:46489152-46489491	1	AGAGGCGTAGGCAGCGCTGGAGGGGCGGGGCTTGCTTTTCTCCCCGCTCTCTGCAGAGGTAAGGCTCCGATTGGC TGTCGAGCGAGACGGGGCCCGCGGATTGGCTGCGCGACAGCCGCCGGCTGACGTGGCGGGGCTGAGACCTGCGGG	64	1	y	1e-07	++++++++++++++
chr4:46489152-46489491	1	AGAGGCGTAGGCAGCGCTGGAGGGGCGGGGCTTGCTTTTCTCCCCGCTCTCTGCAGAGGTAAGGCTCCGATTGGC TGTCGAGCGAGACGGGGCCCGCGGATTGGCTGCGCGACAGCCGCCGGCTGACGTGGCGGGGCTGAGACCTGCGGG	94	1	y	3.5e-05	++ + +++++++++
chr4:46489152-46489491	226	TGTGTCCCGGGCGCTGGGTGGGTGGAAAGCACCCGTGCTTCATCATCGCGGAGATCGGCCAGAACCACCAAGGAG	237	2	y	9.1e-05	+ +++ +++
chr4:155812316-155812664	76	ACGGACTGGTCGTACGGCCAACGGCGTCGAGACAGCGGTGACGTTCAGCCAATGGGAGGGGGCGGGGCGGGGCGG	131	2	y	9.2e-08	+++++++++++
chr15:75748311-75748691	1	cgcctccctcggcccggcGCAGAGCCGCACAAGCCTTTATAGAGACGCGCTTCTGGGCCCGCCTCCCCAGGTGGG	58	2	n	1.5e-06	++++++ ++++
chr15:75748311-75748691	76	GGCCGACGCCCCCGGGCCAATCGGAGCCCCAGACCTGCCGCCCTCATTTGCCTATCCCCATGGCAACCCGGAGCC	89	1	n	1.7e-06	+++++++++++++
chr15:75748311-75748691	151	CAGCTGTCAATCTCCTGCGGGAAACAGCTGTGGGAAGGGGTGGGGAAGGGCCGTCGGCAAGAGGAGTGGGCAGGG	154	3	n	2.3e-05	+++++++++
chr15:75748311-75748691	151	CAGCTGTCAATCTCCTGCGGGAAACAGCTGTGGGAAGGGGTGGGGAAGGGCCGTCGGCAAGAGGAGTGGGCAGGG	184	2	y	8.5e-06	++ ++++ +++
chr18:82855760-82855933	1	CAAAGTGGGCTGTGAGATGCAAATGAGCTGAGCCAGAGCGCCTTCTGATTGGCCGGAGCTCTTCTCCTTTCACCC	42	1	y	4.1e-07	++++++++++++++
chr10:79097573-79097843	1	TAAGATGGCCGGGGACAGACAAAGGCCACAGCGGAGCAGCGAAGGCCCGCCCTCCATGCTCGCTCTCTGTGTATG	46	2	n	6.8e-06	+++++++ ++
chr10:79097573-79097843	76	ATTGGGCAATTCTCAGTCTAGTGCATCCGATTGGATAGCATTTCGGGCTTGGCTACGAGTGACAGTAGACAGAAC	99	1	y	1.8e-05	+ +++++++++ ++
chr10:79097573-79097843	76	ATTGGGCAATTCTCAGTCTAGTGCATCCGATTGGATAGCATTTCGGGCTTGGCTACGAGTGACAGTAGACAGAAC	131	3	y	3.3e-05	++ ++++++
chr10:79097573-79097843	151	CAATTCGTGCGTGAATCAAGCaaaaataaaaataaataaataaataaaaaGCAAGTTCTTGCTCACAGATGTTGT	181	4	n	8.7e-05	++++++ ++
chr12:100724807-100725585	376	GCCAGCGCCCGTTCCCATTGGGCGGCTAGTCCTGACGTTTCAGGAGCCGCCCCGCCCCGCTGCTCGAATTGTTGT	386	1	y	4e-05	+++++ +++++ ++
chr12:100724807-100725585	376	GCCAGCGCCCGTTCCCATTGGGCGGCTAGTCCTGACGTTTCAGGAGCCGCCCCGCCCCGCTGCTCGAATTGTTGT	426	2	n	1.7e-05	++++++++ +
chr12:100724807-100725585	451	TGCTTGGCGGGGAGGCAGGAGAGGGAGGAGCGCGAACGCTCCGATTGGCAAGACCCACGGAATGCCCCACCTACT CGCTTTGGTGCGCACGCGCAGGCAGGCCTTCCCTCTCCTGACCTCCCCAGAATGGTCACACCCCTTATTCCCAGC	516	2	n	3.7e-05	+++ ++ +++
chr12:100724807-100725585	601	TTCGATCTGTTAGTAAACAGTATCTAGTAGTCAGGAGGCGCTCCGGACCTCTGATTGGCTACTGCGGAAAGAGGC GGGGAAAGACGATTGGACCGCTTGGTCCGCCAATCACAGTGGACAAAGGAGGGTCCTGGAGGGAAGCACTTGTCA	648	1	y	1.4e-08	++++++++++++++
chr12:100724807-100725585	601	TTCGATCTGTTAGTAAACAGTATCTAGTAGTCAGGAGGCGCTCCGGACCTCTGATTGGCTACTGCGGAAAGAGGC GGGGAAAGACGATTGGACCGCTTGGTCCGCCAATCACAGTGGACAAAGGAGGGTCCTGGAGGGAAGCACTTGTCA	668	2	y	1.5e-05	+ + ++++++
chr12:100724807-100725585	601	TTCGATCTGTTAGTAAACAGTATCTAGTAGTCAGGAGGCGCTCCGGACCTCTGATTGGCTACTGCGGAAAGAGGC GGGGAAAGACGATTGGACCGCTTGGTCCGCCAATCACAGTGGACAAAGGAGGGTCCTGGAGGGAAGCACTTGTCA	702	1	n	2.3e-05	+ ++++++++ ++
chr9:103365691-103366196	1	aggggagggaggggaggagggagggcgggCCACCAGCAGAGAGAGGCAGCGCCGCGCCTGCGCGCTCGGTTCCGC	19	2	y	1.9e-06	+++ +++++++
chr9:103365691-103366196	76	CCGCCGCTGTgggcgcgccgaggggggcgggcggcgggATGAGAAGGGGGCGGGTCTTCCGGGAGAGCCAATCAG ATGCCCGGACGGAGCGCTTAGGTGACAATCCGTTCCTTCTACGGGGCGGTGCCCTGTATGGGGGCGGGGAGAAAG	96	2	y	1.1e-06	++++++++++
chr9:103365691-103366196	76	CCGCCGCTGTgggcgcgccgaggggggcgggcggcgggATGAGAAGGGGGCGGGTCTTCCGGGAGAGCCAATCAG ATGCCCGGACGGAGCGCTTAGGTGACAATCCGTTCCTTCTACGGGGCGGTGCCCTGTATGGGGGCGGGGAGAAAG	119	2	y	7.3e-07	++++++++++
chr9:103365691-103366196	76	CCGCCGCTGTgggcgcgccgaggggggcgggcggcgggATGAGAAGGGGGCGGGTCTTCCGGGAGAGCCAATCAG ATGCCCGGACGGAGCGCTTAGGTGACAATCCGTTCCTTCTACGGGGCGGTGCCCTGTATGGGGGCGGGGAGAAAG	140	1	n	4.8e-06	+++++++++++ +
chr9:103365691-103366196	76	CCGCCGCTGTgggcgcgccgaggggggcgggcggcgggATGAGAAGGGGGCGGGTCTTCCGGGAGAGCCAATCAG ATGCCCGGACGGAGCGCTTAGGTGACAATCCGTTCCTTCTACGGGGCGGTGCCCTGTATGGGGGCGGGGAGAAAG	208	2	y	3.3e-06	+++++++++
chr9:103365691-103366196	226	CGGGTGTAGGCAAAGAGAGTGACGTCCCTAGTGACTCCTGCCTCCGATTGGCCAGGGAATTTGCCTTGAGGGCGG GCATTTAGAGGGTTGGTGACTTGGCTGAAGAAGACCAGCCGGAGGGGGCGGGTGTGCCTTGGTTGCGCGCATGCG	266	1	y	4.1e-07	++++++++++++++
chr9:103365691-103366196	226	CGGGTGTAGGCAAAGAGAGTGACGTCCCTAGTGACTCCTGCCTCCGATTGGCCAGGGAATTTGCCTTGAGGGCGG GCATTTAGAGGGTTGGTGACTTGGCTGAAGAAGACCAGCCGGAGGGGGCGGGTGTGCCTTGGTTGCGCGCATGCG	291	2	y	1.5e-05	+ +++++++
chr9:103365691-103366196	226	CGGGTGTAGGCAAAGAGAGTGACGTCCCTAGTGACTCCTGCCTCCGATTGGCCAGGGAATTTGCCTTGAGGGCGG GCATTTAGAGGGTTGGTGACTTGGCTGAAGAAGACCAGCCGGAGGGGGCGGGTGTGCCTTGGTTGCGCGCATGCG	342	2	y	9.2e-08	+++++++++++
chr17:6827826-6828276	76	TGTCGTCACCATGGATGGCCAATCAGAGCGCGCGACTAAAATAGCGCAGTATAAAAGCTGGCGGGAGGACACCGG	91	1	n	2.1e-08	++++++++++++++
chr17:6827826-6828276	151	CCGTTCCGCTCCTTTGCCGGGCGTGGTTGCGCGCGCAGGTGATGGGCCTCCGCCCCGCCCACTGCACACCTGCTT	204	2	n	4.7e-06	+++++++ ++
chr17:6827826-6828276	301	AAGCGCAGAACTGGGCTCGTGCTCGGCGGGACTCCCGCCTCCCGGGCTTCTCTTCAGACAGTAGGCCGCCGCAGC	334	2	n	3.3e-06	++++++ +++
chr12:73907712-73908174	1	CTAGCTGCACACAGACAAGCACGTGAGCGGGGCAGCTCGTCCCAGCTGGGGCTCAGCTGACCTCCTCCTGATTGG CTGAGAGCAACGTGGGCTGGGGTGGGGCCTGGCCGCCTGCGTCCTTCACCATTGGCTCTCCGGGAACCCGCCTCC GCTCAGGTGAggcgggcccgcgggcgcgcgcgTTGGGTGCTGAGCGGGCGCGCGCACCCCTCGGCTTTTCCCTCC	65	1	y	9.6e-07	++ +++++++++++
chr12:73907712-73908174	1	CTAGCTGCACACAGACAAGCACGTGAGCGGGGCAGCTCGTCCCAGCTGGGGCTCAGCTGACCTCCTCCTGATTGG CTGAGAGCAACGTGGGCTGGGGTGGGGCCTGGCCGCCTGCGTCCTTCACCATTGGCTCTCCGGGAACCCGCCTCC GCTCAGGTGAggcgggcccgcgggcgcgcgcgTTGGGTGCTGAGCGGGCGCGCGCACCCCTCGGCTTTTCCCTCC	91	2	y	3.9e-05	+ ++++ +++
chr12:73907712-73908174	1	CTAGCTGCACACAGACAAGCACGTGAGCGGGGCAGCTCGTCCCAGCTGGGGCTCAGCTGACCTCCTCCTGATTGG CTGAGAGCAACGTGGGCTGGGGTGGGGCCTGGCCGCCTGCGTCCTTCACCATTGGCTCTCCGGGAACCCGCCTCC GCTCAGGTGAggcgggcccgcgggcgcgcgcgTTGGGTGCTGAGCGGGCGCGCGCACCCCTCGGCTTTTCCCTCC	142	2	n	3.3e-06	++++++ ++ +
chr12:73907712-73908174	1	CTAGCTGCACACAGACAAGCACGTGAGCGGGGCAGCTCGTCCCAGCTGGGGCTCAGCTGACCTCCTCCTGATTGG CTGAGAGCAACGTGGGCTGGGGTGGGGCCTGGCCGCCTGCGTCCTTCACCATTGGCTCTCCGGGAACCCGCCTCC GCTCAGGTGAggcgggcccgcgggcgcgcgcgTTGGGTGCTGAGCGGGCGCGCGCACCCCTCGGCTTTTCCCTCC	156	2	y	1.9e-05	++ + ++++++
chr12:73907712-73908174	226	CCTCGCCGCGCGCCCGAGCGCGCCTCCGCCCTTGCCCGCCCCCTGCCGCTGCTTCAGCGCCTCAGTGCACAGAGC	260	2	n	2.6e-07	++++++++++
chr12:73907712-73908174	376	GCCGGAGGAGCGCCTAGGAACCCGAGCCGGAGCTCAGCGAGCGCAGCCTGCAGCTCCCGCCTCGCCGTCCCGGGG	431	2	n	2e-05	++++++ + ++
chr7:67222418-67222724	1	TGGGATAAATGACATAGGAGCACAAGTCCAGGGTCCACGCTGGAGCCCCGCCCATCAGGGCCCGCCCTCATTCTG	47	2	n	2.4e-05	+++++++ +
chr7:67222418-67222724	1	TGGGATAAATGACATAGGAGCACAAGTCCAGGGTCCACGCTGGAGCCCCGCCCATCAGGGCCCGCCCTCATTCTG	61	2	n	1.7e-05	+++++++ +
chr7:67222418-67222724	76	ACCTCTCAGCACCTCCCGGCTCTGCCAGGGCCCGCCCTCCTCTGAAGTCATTGGTTGGCTCTTAGTCCCCGCCCC CGGAAGACCTGCTTTTTGCAGCCAATCGGCGGGCGCGGTGGCGGTGAAGCCTGGGAGCGAGGTACCCGAACCTGG	106	2	n	7.7e-06	+++++++ ++
chr7:67222418-67222724	76	ACCTCTCAGCACCTCCCGGCTCTGCCAGGGCCCGCCCTCCTCTGAAGTCATTGGTTGGCTCTTAGTCCCCGCCCC CGGAAGACCTGCTTTTTGCAGCCAATCGGCGGGCGCGGTGGCGGTGAAGCCTGGGAGCGAGGTACCCGAACCTGG	119	1	y	9e-05	+ + ++++++++
chr7:67222418-67222724	76	ACCTCTCAGCACCTCCCGGCTCTGCCAGGGCCCGCCCTCCTCTGAAGTCATTGGTTGGCTCTTAGTCCCCGCCCC CGGAAGACCTGCTTTTTGCAGCCAATCGGCGGGCGCGGTGGCGGTGAAGCCTGGGAGCGAGGTACCCGAACCTGG	143	2	n	1.5e-06	+++++++++
chr7:67222418-67222724	76	ACCTCTCAGCACCTCCCGGCTCTGCCAGGGCCCGCCCTCCTCTGAAGTCATTGGTTGGCTCTTAGTCCCCGCCCC CGGAAGACCTGCTTTTTGCAGCCAATCGGCGGGCGCGGTGGCGGTGAAGCCTGGGAGCGAGGTACCCGAACCTGG	169	1	n	1.7e-06	+++++++++++ ++
chr19:56822135-56822509	76	AGCTGAGGGGGCGGGGCTCCCTGAACGAGCCAATCAGCGCGGCGCGGACCGCGTGACGTTAAGCACCTGGAGGCG GGCGTGGTTTTCGAGGCGCCGCCTCCAGTCCTCGCGGTTTCTAGAGGCCCCGCCCAGCATCTCCGTGCCACCTCC	80	2	y	9.2e-08	+++++++++++
chr19:56822135-56822509	76	AGCTGAGGGGGCGGGGCTCCCTGAACGAGCCAATCAGCGCGGCGCGGACCGCGTGACGTTAAGCACCTGGAGGCG GGCGTGGTTTTCGAGGCGCCGCCTCCAGTCCTCGCGGTTTCTAGAGGCCCCGCCCAGCATCTCCGTGCCACCTCC	102	1	n	9.6e-07	++++++++++ ++
chr19:56822135-56822509	76	AGCTGAGGGGGCGGGGCTCCCTGAACGAGCCAATCAGCGCGGCGCGGACCGCGTGACGTTAAGCACCTGGAGGCG GGCGTGGTTTTCGAGGCGCCGCCTCCAGTCCTCGCGGTTTCTAGAGGCCCCGCCCAGCATCTCCGTGCCACCTCC	142	2	y	9.5e-06	++ ++++++
chr19:56822135-56822509	76	AGCTGAGGGGGCGGGGCTCCCTGAACGAGCCAATCAGCGCGGCGCGGACCGCGTGACGTTAAGCACCTGGAGGCG GGCGTGGTTTTCGAGGCGCCGCCTCCAGTCCTCGCGGTTTCTAGAGGCCCCGCCCAGCATCTCCGTGCCACCTCC	199	2	n	5.1e-05	+++++++ +
chr3:131303147-131303400	76	AAGGCACGCCCTTCCGATTGGCTGCGCCGCGTGCCCCTCTCGGGATCCTCCAGTCAGCTGCTCCTGCATAAGGTG GGGGCGGGACGTCCTACGGGACGGCTGGTGGTGACGAGTGGTCTCTCGCAGCACAGCTGAGCTGTCCTGAGTGGG	86	1	y	4.8e-07	++++++++++++++
chr3:131303147-131303400	76	AAGGCACGCCCTTCCGATTGGCTGCGCCGCGTGCCCCTCTCGGGATCCTCCAGTCAGCTGCTCCTGCATAAGGTG GGGGCGGGACGTCCTACGGGACGGCTGGTGGTGACGAGTGGTCTCTCGCAGCACAGCTGAGCTGTCCTGAGTGGG	148	2	y	7.3e-07	+ +++++++++
chr7:19421383-19421619	1	TAGGCGCAGGGCGTGGCGCACCAGCCTGCAGTGTGCGCTGGTGCCCCGCCTCCTGGAAGTCCAATCATTGGGCTC	45	2	n	2.5e-06	++++++ +++
chr7:19421383-19421619	76	TGTCCTCTGGGTTCTGGCCAATGAGAACCTGCCTCTCCGGAGCCCCGCCCACCTGCTTCTCAGGCGCTCCGGAGC	90	1	n	4.1e-07	++++++++ +++++
chr7:19421383-19421619	76	TGTCCTCTGGGTTCTGGCCAATGAGAACCTGCCTCTCCGGAGCCCCGCCCACCTGCTTCTCAGGCGCTCCGGAGC	119	2	n	9.5e-06	+++++++ ++
chr9:118925433-118925645	1	TAGATTGTCTTCTCCAGCCCGTCTGTCAGTCACGAGCTTCAGCTCCGCCCACACAGCGGTAATTGGTGAGGAgcg	23	3	n	2.9e-06	++++++ +++
chr9:118925433-118925645	76	cgcgcgagcgcccgcggcccgcccccTTCAGCACTGCCCCCGCCCACCGGTTGACAGGGCTGCAAGTGGGGCCTG	93	2	n	7.3e-07	++++++++++
chr9:118925433-118925645	76	cgcgcgagcgcccgcggcccgcccccTTCAGCACTGCCCCCGCCCACCGGTTGACAGGGCTGCAAGTGGGGCCTG	114	2	n	6.1e-06	+++++++ ++
chr8:70212259-70212973	1	tgcctcagccgcctcagccgctgcagccccgccTCGCGCGGGCCCTAAGCTCGAGGCCGGGAGGGGCCCAGGCCC	28	2	n	3.2e-05	++++++ + +
chr8:70212259-70212973	76	TGCCGCCATTGGTCACGCCCTGTCCAATCAGCGCTGGAGACGGCAAGAATTGGTAAGCATGGCACAGACGGGCAT	77	1	y	3.1e-05	++ + ++++++++
chr8:70212259-70212973	76	TGCCGCCATTGGTCACGCCCTGTCCAATCAGCGCTGGAGACGGCAAGAATTGGTAAGCATGGCACAGACGGGCAT	96	1	n	4.8e-06	++ ++++++++ ++
chr8:70212259-70212973	151	CCTTTTTAACCAATCGCTAAAGGAAGGGGCGAGGCTACATGGAGGGGCGGCCCTGGTTCTTCTGAGCGTTCTACA	157	1	n	4.3e-05	++++++++++ +
chr8:70212259-70212973	376	ACAGAAGCGAGGATTGGATTCTGCAGAAAACAAGCAACGCTTTGGGCCAATAACTGAAGGGAGGGGGCGGGGCCT	436	2	y	9.2e-08	+++++++++++
chr8:70212259-70212973	451	GGAAACAGCCCTCTTAGCCAATCGCTGAAGAGCAAGGTCAGCGCTCTGAGTAAGCTGGCGCGCTGGGCAAGGGCG	465	1	n	2.1e-05	++++++++++ +
chr8:70212259-70212973	526	AAGCTCGAGGATCGGAGGGTGTAGCCCGGAGGGCAACGATGATTGACTGCGACACTAAAGATGTACAGGTCCTGG GACCAATCGCAGAAGCTGTAGGCGGTGCATCTTCCAGGGGTGGGCGCGCTAGGTACAGACCATAACTATCTTGTC	565	3	y	2.7e-05	++++++++ +
chr8:70212259-70212973	526	AAGCTCGAGGATCGGAGGGTGTAGCCCGGAGGGCAACGATGATTGACTGCGACACTAAAGATGTACAGGTCCTGG GACCAATCGCAGAAGCTGTAGGCGGTGCATCTTCCAGGGGTGGGCGCGCTAGGTACAGACCATAACTATCTTGTC	600	1	n	3.3e-05	+++++++++ ++
chr8:70212259-70212973	526	AAGCTCGAGGATCGGAGGGTGTAGCCCGGAGGGCAACGATGATTGACTGCGACACTAAAGATGTACAGGTCCTGG GACCAATCGCAGAAGCTGTAGGCGGTGCATCTTCCAGGGGTGGGCGCGCTAGGTACAGACCATAACTATCTTGTC	634	2	y	3e-05	++++ +++
chr5:115845057-115845370	1	AACCCCGCCTGGATTCCTTTGCCCTCTTTCTATTGGTCGCTAGTCAAAGGAAGAGACAATGTGATTGGCTTTTCC	26	1	y	4.9e-05	+++ + ++++++++
chr5:115845057-115845370	1	AACCCCGCCTGGATTCCTTTGCCCTCTTTCTATTGGTCGCTAGTCAAAGGAAGAGACAATGTGATTGGCTTTTCC	58	1	y	2.9e-05	+ +++++++++
chr5:115845057-115845370	76	ATTTCACTTCCTCTAGCCCTCCGAGATCTGGGCGGGTCCTGGTGGAGACCCCCGCTGTCCATCAGTAGATGGCGA	101	2	y	7.7e-05	+++++++
chr5:115845057-115845370	76	ATTTCACTTCCTCTAGCCCTCCGAGATCTGGGCGGGTCCTGGTGGAGACCCCCGCTGTCCATCAGTAGATGGCGA	130	3	n	1.4e-05	+++++ ++++
chr5:115845057-115845370	151	GCGCTGATTGGTTGAGGCACGGCCGAGACCTGCCCACGTCGTTTCCTTCAAACGTTGGGGCGGGAGACTCAGGGC	151	1	y	6.8e-07	++ +++++++++++
chr5:115845057-115845370	151	GCGCTGATTGGTTGAGGCACGGCCGAGACCTGCCCACGTCGTTTCCTTCAAACGTTGGGGCGGGAGACTCAGGGC	204	2	y	1.3e-05	+ ++++++++
chr11:96829506-96830365	1	TGACCCACCCTTAAAAGCGAGCCTCACCCCGCCCTCCGTTCCCCAGGCCCCACCCCGCTCGCGAGCCCAGCCTCA	4	2	n	8.4e-05	+++ +++
chr11:96829506-96830365	1	TGACCCACCCTTAAAAGCGAGCCTCACCCCGCCCTCCGTTCCCCAGGCCCCACCCCGCTCGCGAGCCCAGCCTCA	28	2	n	4.7e-06	+++++++ ++
chr11:96829506-96830365	1	TGACCCACCCTTAAAAGCGAGCCTCACCCCGCCCTCCGTTCCCCAGGCCCCACCCCGCTCGCGAGCCCAGCCTCA	49	2	n	5.4e-05	+++ ++++ +
chr11:96829506-96830365	76	CCACGCCCTCCCATGCCCTCGGCCCTTCTCAGTCCAGCCCACCCAGGAACACGCTTTCTGGTCGGCCCCGCGTTT	77	2	n	8.1e-05	+ +++++ +++
chr11:96829506-96830365	151	CTTTCCGGCCGTGTCCAGGGCCCGAGCCCGATCAAGACCCCTCTCGGCCTCCCGGGTCCCGCCTCCTGCTCCTCA	208	2	n	2.5e-06	++++++ +++
chr11:96829506-96830365	376	CGCCACCGCCGCCGTCGCCGCCACCTCCGGCCGGCCTGGAGCGCCCAGCCTCGGCTTCCCTCCCCGCCCCCTCCT	438	2	n	9.2e-08	+++++++++++
chr11:96829506-96830365	451	TCCACTGCACTCGGAAACCCGCCCGCCACGGCCACCCCAGAAACAGTTGGTCCAATCAGATAGCCGGGACTAGAG	468	2	n	5.4e-05	+++++++ ++
chr11:96829506-96830365	451	TCCACTGCACTCGGAAACCCGCCCGCCACGGCCACCCCAGAAACAGTTGGTCCAATCAGATAGCCGGGACTAGAG	499	1	n	5.9e-05	+ +++++++++
chr11:96829506-96830365	526	TCGTCACCGGATGTCACTTTGATTGACAGCAAAGAAAACCCAATAGTCGAGTTTGTGTCTGCCCACTCGGCACAG	545	3	y	1.1e-06	++++++++++
chr11:96829506-96830365	601	TCCTCCCGAGACTGACGTGGAGAGAAGTCCAATGAGTGTGCAGGCCCGCCCCCCGGTATGGACCCACCAATGAGT GAGGCGAAGGCCCTAGTGTCCGGCATTCTGAACCTCTCCGCTGCGGGTTGGAGGTGGGCGGTGTTGTAAGTTAGG	645	2	n	4.1e-07	++++++++++
chr11:96829506-96830365	601	TCCTCCCGAGACTGACGTGGAGAGAAGTCCAATGAGTGTGCAGGCCCGCCCCCCGGTATGGACCCACCAATGAGT GAGGCGAAGGCCCTAGTGTCCGGCATTCTGAACCTCTCCGCTGCGGGTTGGAGGTGGGCGGTGTTGTAAGTTAGG	664	1	n	9.9e-05	+ ++++++ ++ +
chr11:96829506-96830365	601	TCCTCCCGAGACTGACGTGGAGAGAAGTCCAATGAGTGTGCAGGCCCGCCCCCCGGTATGGACCCACCAATGAGT GAGGCGAAGGCCCTAGTGTCCGGCATTCTGAACCTCTCCGCTGCGGGTTGGAGGTGGGCGGTGTTGTAAGTTAGG	723	2	y	4.5e-05	++ ++ +++
chr13:62760675-62760924	1	GGAGCGGAACGCAGAGCAGGGGAACAAGGCACACTAAAGAACACGCCTCTACTTCTATTGGCGGGCCTATCCGGA	51	1	y	9.9e-05	++ + ++++++ +
chr13:62760675-62760924	76	GGCCCTGATTGGTTAGTGAGACTTGATTGACATGAGCACCTCCCTTAGGGTTAGAGTGCACTGAAGGCACACAGC	77	1	y	3.4e-07	++ +++++++++++
chr13:62760675-62760924	76	GGCCCTGATTGGTTAGTGAGACTTGATTGACATGAGCACCTCCCTTAGGGTTAGAGTGCACTGAAGGCACACAGC	99	3	y	7.4e-06	+++++++++
chr9:124282199-124282458	1	AAGAACCCTCCTCTTCTTCTGACTGGCAGGTCCGTCTCAAGGCTCTGATTGGCCAGTGGTCTTGAGTGACTTGAG	20	3	y	2.4e-05	+++ ++ +++
chr9:124282199-124282458	1	AAGAACCCTCCTCTTCTTCTGACTGGCAGGTCCGTCTCAAGGCTCTGATTGGCCAGTGGTCTTGAGTGACTTGAG	42	1	y	2.1e-08	++++++++++++++
chr11:84869861-84871049	226	CCCCGCGAGCGTAAGCACCCGCCACCTCGCAGCACATTCGCCACGGGTGAAAGGGGTGGGGGGGCGCGGAGCGAG	275	2	y	2.2e-05	+ ++++ +++
chr11:84869861-84871049	301	AGAGGACAGGAGAGCCGCGCTGCGTTTCCCATCACCCGATTCCACACGCGCTCAGCCAATCAGCGCCCCGCAGCG	353	1	n	1.9e-07	+++++++++++ ++
chr11:84869861-84871049	376	CCGGGACCCGCCCCCTCGCGCCGCCTGCCCTCCCCCACCCAGAccccccctccccacccacccaccccccccccc	382	2	n	9.2e-08	+++++++++++
chr11:84869861-84871049	376	CCGGGACCCGCCCCCTCGCGCCGCCTGCCCTCCCCCACCCAGAccccccctccccacccacccaccccccccccc	409	2	n	9.8e-05	+++ +++ +
chr11:84869861-84871049	376	CCGGGACCCGCCCCCTCGCGCCGCCTGCCCTCCCCCACCCAGAccccccctccccacccacccaccccccccccc	436	2	n	2.5e-06	+++ +++++++
chr11:84869861-84871049	451	cccgcccGCCGGCCTCCAGTCAGGGTCCAAAGGAGAGGCGGAAAAGGACCTGCTGGCCCCGGGACATCCCCGCCC AGCTCGGGAGTCCGGGCTCCAGAAGCCCATCCCCGCCTCGGCTACACAGCCCAAGCCCGCACCCCCTGCCGCTGA	451	2	n	4.5e-05	+++++++ ++
chr11:84869861-84871049	451	cccgcccGCCGGCCTCCAGTCAGGGTCCAAAGGAGAGGCGGAAAAGGACCTGCTGGCCCCGGGACATCCCCGCCC AGCTCGGGAGTCCGGGCTCCAGAAGCCCATCCCCGCCTCGGCTACACAGCCCAAGCCCGCACCCCCTGCCGCTGA	519	2	n	5.4e-05	+++++++ +
chr11:84869861-84871049	451	cccgcccGCCGGCCTCCAGTCAGGGTCCAAAGGAGAGGCGGAAAAGGACCTGCTGGCCCCGGGACATCCCCGCCC AGCTCGGGAGTCCGGGCTCCAGAAGCCCATCCCCGCCTCGGCTACACAGCCCAAGCCCGCACCCCCTGCCGCTGA	557	2	n	3.2e-05	++++++ + +
chr11:84869861-84871049	601	CCCCTTCTCTCCTGGCTGAGCGCCCCGCCCAGGGTGGCCCCCTAGGCTGCAGTTGCCCGGCGCCACCCCGCCCCT GGGAGGGGTCGACCCTGCCTCGGCTCTGCAGAGTTGGGGTGGGGGCGAGCTCAGACCCCAGTCCTCACCCGGGTC	624	2	n	5.9e-05	+++++++
chr11:84869861-84871049	601	CCCCTTCTCTCCTGGCTGAGCGCCCCGCCCAGGGTGGCCCCCTAGGCTGCAGTTGCCCGGCGCCACCCCGCCCCT GGGAGGGGTCGACCCTGCCTCGGCTCTGCAGAGTTGGGGTGGGGGCGAGCTCAGACCCCAGTCCTCACCCGGGTC	667	2	n	6.8e-06	++++++++
chr11:84869861-84871049	601	CCCCTTCTCTCCTGGCTGAGCGCCCCGCCCAGGGTGGCCCCCTAGGCTGCAGTTGCCCGGCGCCACCCCGCCCCT GGGAGGGGTCGACCCTGCCTCGGCTCTGCAGAGTTGGGGTGGGGGCGAGCTCAGACCCCAGTCCTCACCCGGGTC	708	2	y	4.5e-05	+ ++++ +++
chr11:84869861-84871049	751	GGAGAGAGAGAGCTCTCGGTTCTGACCTTCACTGACTTCGAGGACGCCTCCCTGACCCCCACCTCTGCTCCCCGT	808	2	n	4.5e-05	+++ ++ + +
chr11:84869861-84871049	826	TACCGGCTGACGAGGCCCGCGTCAGGGCCGGCCTGGGCGGGAGCGCGGCTGCGATTGCCGTTTCCTCTCCAGGCT	856	2	y	4.2e-05	+ +++++++
chr11:84869861-84871049	901	CAGTCAGCCGCTCGCGCCACggggagtgtgggagggagggcgggggacgtggggagggtggggccggggaggggg	934	2	y	1.9e-06	+++ +++++++
chr11:84869861-84871049	901	CAGTCAGCCGCTCGCGCCACggggagtgtgggagggagggcgggggacgtggggagggtggggccggggaggggg	952	2	y	1.4e-05	+++ +++ +++
chr7:113207190-113207597	1	GGGGCGTGTGCTTCTGTGCGCCAAATGATTGGTGAAGGGAAAGTAGCAGGTAAACCAGCCCTGCCGTCTTGCCAT TGGTCAGAGGCTTTCCTATCGGTCACTCGATTGGCTAGCCTAACGCAGAGCAGAACGCGAATTGGTTTGGGTTGT	68	1	y	2.3e-05	+++ + ++++++++
chr7:113207190-113207597	1	GGGGCGTGTGCTTCTGTGCGCCAAATGATTGGTGAAGGGAAAGTAGCAGGTAAACCAGCCCTGCCGTCTTGCCAT TGGTCAGAGGCTTTCCTATCGGTCACTCGATTGGCTAGCCTAACGCAGAGCAGAACGCGAATTGGTTTGGGTTGT	99	1	y	2.6e-05	+ ++++++++++
chr7:113207190-113207597	151	CCGCCAAGACAACTCCGTTCGCTCTCTCTGATTGGCTAACGGGAAGAGGCAGGTATCCGGGCTGCGCGGCTCCTC	175	1	y	3.5e-08	+++++++++++++
chr7:113207190-113207597	226	CATTGGTGGGCGGGGAAGGGGGGTTGGGCACAGCGATTGGTgggcggggggccgggcctgggccggcggggAGCG	229	2	y	8.5e-06	++ +++++++
chr7:113207190-113207597	226	CATTGGTGGGCGGGGAAGGGGGGTTGGGCACAGCGATTGGTgggcggggggccgggcctgggccggcggggAGCG	263	2	y	8.5e-06	++ +++++++
chr6:83121388-83121807	1	atcactccgcggccgGAGCTCCCGGCCGGGGAGAGCACCTCCAGAGGACACAGTTGCTCAGTCCAGCCAATCAGA ATCGCTAACTAACAGATCAGCCAATAGGAACCGGTCACAGGTTTCTCCTTTTGCCCAATCCGCAGCGGCGCCTGT	64	1	n	3.4e-07	+++++++++++++
chr6:83121388-83121807	1	atcactccgcggccgGAGCTCCCGGCCGGGGAGAGCACCTCCAGAGGACACAGTTGCTCAGTCCAGCCAATCAGA ATCGCTAACTAACAGATCAGCCAATAGGAACCGGTCACAGGTTTCTCCTTTTGCCCAATCCGCAGCGGCGCCTGT	93	1	n	3e-06	++++++++ +++++
chr6:83121388-83121807	151	GCCGCTCTCCCAGACAACAAGAACTCACACAGACAAAGACAGGGGAAAGGCTCGACCAAATGCCTGACTGACAGC	215	3	y	2.9e-06	+++ ++++++
chr6:83121388-83121807	226	AACAATAGCCAGTACGGACAACAGAACAAGCTTTGACTTATCGGCCAATGAACGGCCGTTCAGCACAAAAATTTT CGCCGATTGGCTGAATGACTTTACACACTCAGGTTCAGACTCCGCCGGCTTCCCACTCCAGCAATTCGATACAAG	267	1	n	1.8e-05	++++++++ + ++
chr6:83121388-83121807	226	AACAATAGCCAGTACGGACAACAGAACAAGCTTTGACTTATCGGCCAATGAACGGCCGTTCAGCACAAAAATTTT CGCCGATTGGCTGAATGACTTTACACACTCAGGTTCAGACTCCGCCGGCTTCCCACTCCAGCAATTCGATACAAG	300	1	y	3e-06	+ +++++++++++
chr6:83121388-83121807	376	CTGAGGCACTGTACGAAATTTAATAGGGTGGGGGAGACAGCAGG	397	2	y	8.8e-05	+ +++ +++
chr11:49846509-49846998	76	AGGGGGCGCCACTCTGCACTAGGGCATCCAGAGCGCGCCACTGGCCCCGCCCACACCCAGCCTCCAGCCACGCCC	121	2	n	7.7e-06	+++++++ + +
chr11:49846509-49846998	151	GTACTGCCCAGCCTTGCCCACCCCCAGTCTCAATTGGTCCCGCCTGTCTGGATATCCTAGTTCTGATTGGCTGGC	167	2	n	1.4e-05	+++ +++++
chr11:49846509-49846998	151	GTACTGCCCAGCCTTGCCCACCCCCAGTCTCAATTGGTCCCGCCTGTCTGGATATCCTAGTTCTGATTGGCTGGC	210	1	y	3.1e-08	++++++++++++++
chr11:49846509-49846998	301	GGAAGGGTCGCAGCGCCCCGCGCCCCTCACACCCACTGCGACGGCGAcggggcggagcagagcggggcggggcgA	361	2	y	1.7e-05	+ ++++++++
chr2:161109059-161109434	1	AAGGACACCCTAACCCAGCTTGGGCCCGCCTTCCCTGCCGCGCTATTGGGTTTCGCCTGCCCAAAACACAGGTTC	25	2	n	9.5e-06	++++++ +++
chr2:161109059-161109434	76	ATTGGTCGTGTGGGCTGCCGATCAGACAGAAGCCCGTTTCAAGCTTGCTTGCAGGAGCGAGTGATGGGCTTGCTC	90	3	n	9.2e-05	+++ + ++++
chr2:161109059-161109434	151	CATTGTGCTCGTATTTGCATGGATGTGATCGCAGCGGTGATTGGTCGATGTCGGAGCCGCTCCGCCTCCCAGCCT	184	1	y	9.2e-06	++ ++++++++++
chr2:161109059-161109434	226	AGATCTCCCCGCCTTGCAGACAGCGCAGCTCCCGGCCCGCCCCCCCGGAATGAAGCGGCCGGGCCGCGggggcgg ggcggggctggggtcccgcaggcggagggggcggggcggggtgCTGCGCTCTGTTTTGCAAGCAGGGGGCGAGGA	233	2	n	8.1e-05	++++++ +
chr2:161109059-161109434	226	AGATCTCCCCGCCTTGCAGACAGCGCAGCTCCCGGCCCGCCCCCCCGGAATGAAGCGGCCGGGCCGCGggggcgg ggcggggctggggtcccgcaggcggagggggcggggcggggtgCTGCGCTCTGTTTTGCAAGCAGGGGGCGAGGA	261	2	n	1.7e-07	+++++++++++
chr2:161109059-161109434	226	AGATCTCCCCGCCTTGCAGACAGCGCAGCTCCCGGCCCGCCCCCCCGGAATGAAGCGGCCGGGCCGCGggggcgg ggcggggctggggtcccgcaggcggagggggcggggcggggtgCTGCGCTCTGTTTTGCAAGCAGGGGGCGAGGA	291	2	y	4.1e-07	+ +++++++++
chr2:161109059-161109434	226	AGATCTCCCCGCCTTGCAGACAGCGCAGCTCCCGGCCCGCCCCCCCGGAATGAAGCGGCCGGGCCGCGggggcgg ggcggggctggggtcccgcaggcggagggggcggggcggggtgCTGCGCTCTGTTTTGCAAGCAGGGGGCGAGGA	325	2	y	9.2e-08	+++++++++++
chr11:50292155-50292717	76	TTCCAGGCCGGGGAACACCGCCCGCCTCAGGCTTCGGCCTGTCCGCTATACCCCTGCCCCATTGTTTTCCGCGCC	96	2	n	4.5e-05	++++++ +
chr11:50292155-50292717	151	GCTGCCGCCGCCATCTTAAAATTGTTTTCGGGGCTTTCGGAAGAGGGCGGGGCCTGGGCCGGCGAACTCTGCGTC	191	2	y	6.1e-06	++ +++++++
chr11:50292155-50292717	226	ACTGCTGATGGACCGAAGCTCTAGCCAATCAAAGGAAACCCGCTGCCCGAGGGCGTGGGGGACAAGCACGTCAGG	247	1	n	2.4e-07	++++++++++ +++
chr11:50292155-50292717	301	AATTTTCGGGTATTTAAACTGAACACTCTGGCGAGGAGGGAAGCCCGAGGCGGGCTCAGTGCGGGAGAGTGAACT	344	2	y	4.8e-05	+ ++++++
chr11:50292155-50292717	376	GTGACTGACGGGAACCTATCCAAGAAGAGCCACGTTTTCTGAACACCGCCCCCTGAAAGCAGTCCCTTCCGGGTT	377	3	y	1.6e-05	+++ ++++ +
chr12:84772930-84773450	1	TGTCCCGGACCGAGGGTGGAGCCAGATCAGGCCACTTGTGAGCAGTAACCAGCGAAggcccgcccgcgccccgcc ctgggctccggggccgccTGGCCTGCAGCTCGCCCTTTATCTCCGCCCATCTCTTCCGCTTCCAGGCAGGGCCTA	59	2	n	4.5e-05	+++++++ + +
chr12:84772930-84773450	1	TGTCCCGGACCGAGGGTGGAGCCAGATCAGGCCACTTGTGAGCAGTAACCAGCGAAggcccgcccgcgccccgcc ctgggctccggggccgccTGGCCTGCAGCTCGCCCTTTATCTCCGCCCATCTCTTCCGCTTCCAGGCAGGGCCTA	70	2	n	5.4e-05	+++++++
chr12:84772930-84773450	151	CGGAGAACTCGCTCTTTGCGTTCGCCCCGCTCTATTGGTACCGACCCACTTCGGCAAGTGGAAGCGTTCTCTGTC AATCAAAGCCCTCTTATCTCGCTATACCCAATAGGCACGCTTGGGGGCGGAGGCTCGATGCAGCCCCGCCCCCTT	221	3	n	1.1e-06	++++++++++
chr12:84772930-84773450	151	CGGAGAACTCGCTCTTTGCGTTCGCCCCGCTCTATTGGTACCGACCCACTTCGGCAAGTGGAAGCGTTCTCTGTC AATCAAAGCCCTCTTATCTCGCTATACCCAATAGGCACGCTTGGGGGCGGAGGCTCGATGCAGCCCCGCCCCCTT	250	1	n	5.9e-05	++ +++++ ++ ++
chr12:84772930-84773450	151	CGGAGAACTCGCTCTTTGCGTTCGCCCCGCTCTATTGGTACCGACCCACTTCGGCAAGTGGAAGCGTTCTCTGTC AATCAAAGCCCTCTTATCTCGCTATACCCAATAGGCACGCTTGGGGGCGGAGGCTCGATGCAGCCCCGCCCCCTT	290	2	n	7.3e-07	++++++++++
chr12:84772930-84773450	301	CTCCCCTCCTCCGGAAGCCCAGGCTAGGCGGGGATTTGGACCATGCTAGGGGCGGAGCTTGCGGAGTAAGATGGC	322	2	y	5.9e-05	++ ++++++
chr5:138441372-138441642	1	TGAACTGTCACTCAGGGTGGACCTGAAGCGCTACCCTATCAGACACAATAGACTGAAGGCTACCCAATCAGACAC	5	3	n	2e-06	++++++ +++
chr5:138441372-138441642	76	ACGGTCGGAAGGGAGGAGGCGGGCCTTGCGTACGTTGTTGCTGACCCCGCCATCTTGGCATCTGTGGCCGCTTTC	88	2	y	1.1e-06	++++ ++++++
chr5:138441372-138441642	151	TTCTCCCAGCTCTGTGTTCTGGATTGCACCTAGTGTCTGTCGCCGTGTGACTCGCTGGTACCTGGACACCCAGCG CGAGGCGGGGCGCTCACCTGAGTCCCGAAATGGTGCGTTTACCCA	224	2	y	3.2e-05	+ + ++++++
chr12:118301198-118302478	76	AGAGGTGGGTGGGGGTGGGGGCGAGGCGGGAGGAGAGGCCGGTCCCGCCCGCCCGCGGTGGCTCGGAGGAGGCTG	84	2	y	7.7e-06	+ +++++ +++
chr12:118301198-118302478	76	AGAGGTGGGTGGGGGTGGGGGCGAGGCGGGAGGAGAGGCCGGTCCCGCCCGCCCGCGGTGGCTCGGAGGAGGCTG	95	2	y	2e-05	++ + ++++++
chr12:118301198-118302478	76	AGAGGTGGGTGGGGGTGGGGGCGAGGCGGGAGGAGAGGCCGGTCCCGCCCGCCCGCGGTGGCTCGGAGGAGGCTG	119	2	n	3e-05	+++++++ +++
chr12:118301198-118302478	226	CCGAGCCCGGCTGACTCGCCCTTGATTGACAgcggcggcgcgcggcgagggcggcggcgcgggccggggggcgga	248	3	y	1.1e-06	++++++++++
chr12:118301198-118302478	301	gccagggcggcgcgagcgcggcgACTCCCCACCCCCCTCGGCCTGCCTCCGCCGGCGCCGCCGACTCTCCACCCC	328	2	n	9.5e-06	+++ ++++++
chr12:118301198-118302478	526	GCTGCCGGCAGGCCCTCCATACAGCCAAACTTGTTGTCTCAGGATATCCCGCCCCCTACTCAGTTCCCGGCGCCC	573	2	n	5.2e-07	++++++++++
chr12:118301198-118302478	751	GTGAGCATGGCTTTTCCTAAGGCGCATCCGGACCCGGGCGCCCTTTTTCCCTGGCTCGGCTCTCATTGGATGAGG	809	1	y	3.4e-06	+++++ +++++ ++
chr12:118301198-118302478	826	CCGCTGACGCACAGTGAGTCGTGGGAGGAGGCGGGCGGGCCTCTCCCGCAAAGGCTTTCGGGCCTCGTAGTTTTT	850	2	y	1.1e-06	++++ ++++++
chr12:118301198-118302478	901	GACGGCTATTCCGATTGAGGCACCGCCTTCCTCCCGCCCCCGAACGCGGCCTGGCTGCGGAGCCTAGAGCTGCCC	933	2	n	2.1e-06	+++++++++
chr12:118301198-118302478	1126	CGCTCCCCGCGGGGCGAGCTCACACCCGGAGCGCGCGGCGATTGAGCGGACCGAGGTGTTGGGAGGCGGGGTCTG	1185	2	y	5.3e-06	+++ ++++++
chr8:4613054-4613364	1	AACACACTCTAACCCAAAGGGATGTGTTCCTGTCACTCAAGACTCATTGGCCAATCAGGTTCTCCAGGAAGGCCT	30	3	n	2e-06	++++++ +++
chr8:4613054-4613364	1	AACACACTCTAACCCAAAGGGATGTGTTCCTGTCACTCAAGACTCATTGGCCAATCAGGTTCTCCAGGAAGGCCT	48	1	n	1.5e-05	+++++++++++
chr8:4613054-4613364	76	CTCAGTCAGAAGAGGCGGGTTCTTCCGGGTGCCATACTGCAAGTCCAGCTCCGCCGCTGAGAAGCTCGAACGGTT	84	2	y	5.3e-06	++ + ++++++
chr8:4613054-4613364	226	TGAGAGCAGGGTCACTTCCCCACGGCAAGGGGAAGAGCAGCCGGAGTGAGAGTGGTGGGTCCTCCCCAGAGGCTG GGTGGGAAGG	296	2	y	7.1e-05	++ +++ +++
chr2:84715097-84715872	1	acgcccgccccgccgccgcgcgcTCCCGACGGCCGACGCTCGCCTCTGTGCGGCCGGCGCGCGGCCGCTGCCCTC	4	2	n	6.1e-06	++++++++ ++
chr2:84715097-84715872	76	AGCCTCCGGTCTGTAGCCTCACGACGTTCCCATTGGCTcccgggcgcgggcgcgggcgcgggcgACGTCTCTCGC	101	1	y	3.8e-06	+++++ +++++++
chr2:84715097-84715872	151	GGGGCACGTTCTTCTCATTCATGCGGCTCGCGCCGCCGAGCCCGCCCCCGTTCACTCTTCCATTCACCCCCTAAC	191	2	n	2.5e-06	+++++++++
chr2:84715097-84715872	226	CCCCGCCCCCACGGCGCTCTAGAGCGTGCGCGCGACCGCGGGCGACCGCGGCGACCTCGCCTTCTGATTGGCTGC	227	2	n	7.3e-07	+++++++++ +
chr2:84715097-84715872	226	CCCCGCCCCCACGGCGCTCTAGAGCGTGCGCGCGACCGCGGGCGACCGCGGCGACCTCGCCTTCTGATTGGCTGC	286	1	y	1e-07	++++++++++++++
chr2:84715097-84715872	601	ATAGCCAATCACCGTTAAGCCTTTCCGGCTTCCTTCCTTGCCTCTTCATTCATTGGTGTGAGGATTCGGTCGGGC	602	1	n	3.8e-06	++++++++++ +
chr11:96916459-96916886	1	GAGCCTCAGTTCCGAAACAAACCGGCCTCCTTCAGCCACGTCGCCGTCTTCAGCGGAGCCAATCCAAGACCACGC	56	1	n	8.1e-05	++++++++ ++
chr11:96916459-96916886	76	TCCGCCCCTCTGCTGAAAGCCCCGCCCATCACGATGTTCTGATTGGTTGAGTACCGGAGGGGCGGGAGAATAGCT	96	2	n	2.4e-05	+++++++ +
chr11:96916459-96916886	76	TCCGCCCCTCTGCTGAAAGCCCCGCCCATCACGATGTTCTGATTGGTTGAGTACCGGAGGGGCGGGAGAATAGCT	111	1	y	1.6e-07	++++++++++++++
chr11:96916459-96916886	76	TCCGCCCCTCTGCTGAAAGCCCCGCCCATCACGATGTTCTGATTGGTTGAGTACCGGAGGGGCGGGAGAATAGCT	131	2	y	1.2e-06	++ ++++++++
chr11:96916459-96916886	151	GACAGCCAATGGAAGGCGAGAGGCGGGCTCCGGCCGGGTGATCTCCAGGAAGGGATGTTACACTTGCACGATGGC	153	1	n	6.7e-06	++++++++ + +++
chr11:96916459-96916886	151	GACAGCCAATGGAAGGCGAGAGGCGGGCTCCGGCCGGGTGATCTCCAGGAAGGGATGTTACACTTGCACGATGGC	167	2	y	1.3e-05	+ + ++++++
chr12:111442385-111442757	1	TAGGTAGCCAATCAGAGACCGTGGTGCGACAACAGCTCTCCGCTAAGCGGAACTCGTGGCTCCCTGTGCACGCAC	5	1	n	3.5e-08	+++++++++++++
chr12:111442385-111442757	76	ATCAAGACCACTCTTTCCAGGCTATTGGGAACAGCAAAGTGACCCCGCCCCTCTCTCTACCGGCCCGGCCCCGCC CCCAACACTGGACTCGCCGGGCCGAGGCGTCCGCCAGCGGATTTTCCGCGGTTGCGGTTGGTGGAGCAGGCAGAG	119	2	n	5.3e-06	++++++++ +
chr12:111442385-111442757	76	ATCAAGACCACTCTTTCCAGGCTATTGGGAACAGCAAAGTGACCCCGCCCCTCTCTCTACCGGCCCGGCCCCGCC CCCAACACTGGACTCGCCGGGCCGAGGCGTCCGCCAGCGGATTTTCCGCGGTTGCGGTTGGTGGAGCAGGCAGAG	145	2	n	2.8e-06	+++++++++
chr3:104511650-104512228	226	ACCCTGACAGACACCGCTCGTCCGCCCCGCCCCGCGACGCAACGTACTCACGCTCAGCAGCCAGCCAATCGGAGC	251	2	n	1.1e-05	++++++++ +
chr3:104511650-104512228	226	ACCCTGACAGACACCGCTCGTCCGCCCCGCCCCGCGACGCAACGTACTCACGCTCAGCAGCCAGCCAATCGGAGC	287	1	n	1e-07	++++++++++++++
chr3:104511650-104512228	301	CCCGGGATGAGGTTGCGTCGGAAATTGGGTTCTGAGAGAGGCGAGGCCTACGATTGCCCCGCCCCCTAGGAGGCG	358	2	n	5.2e-07	++++++++++
chr7:44986452-44986988	1	AAAGCCGTCCATCTGAGAGCTTCATATTTCAATTGGATGACAGACACGCCTATCAAACATAAAGTGCCCGCCCCC CTAGCGTTTAAAGGCCCGCCCCCTCCTGTCCGCTAGGAAGAGAACAACTGCCTGTCTGTCTCACCCAGCACGTGT GACGATTGGGTAAAATTCACCAGATCTTCCCGCCCCTTTCTGGCCAGCTCCGCCCTGGAGCTTCCCGGCGGGCTC	67	2	n	1.1e-06	++++++++++
chr7:44986452-44986988	1	AAAGCCGTCCATCTGAGAGCTTCATATTTCAATTGGATGACAGACACGCCTATCAAACATAAAGTGCCCGCCCCC CTAGCGTTTAAAGGCCCGCCCCCTCCTGTCCGCTAGGAAGAGAACAACTGCCTGTCTGTCTCACCCAGCACGTGT GACGATTGGGTAAAATTCACCAGATCTTCCCGCCCCTTTCTGGCCAGCTCCGCCCTGGAGCTTCCCGGCGGGCTC	90	2	n	9.2e-08	+++++++++++
chr7:44986452-44986988	1	AAAGCCGTCCATCTGAGAGCTTCATATTTCAATTGGATGACAGACACGCCTATCAAACATAAAGTGCCCGCCCCC CTAGCGTTTAAAGGCCCGCCCCCTCCTGTCCGCTAGGAAGAGAACAACTGCCTGTCTGTCTCACCCAGCACGTGT GACGATTGGGTAAAATTCACCAGATCTTCCCGCCCCTTTCTGGCCAGCTCCGCCCTGGAGCTTCCCGGCGGGCTC	149	1	y	8.5e-05	++ +++++++ ++
chr7:44986452-44986988	1	AAAGCCGTCCATCTGAGAGCTTCATATTTCAATTGGATGACAGACACGCCTATCAAACATAAAGTGCCCGCCCCC CTAGCGTTTAAAGGCCCGCCCCCTCCTGTCCGCTAGGAAGAGAACAACTGCCTGTCTGTCTCACCCAGCACGTGT GACGATTGGGTAAAATTCACCAGATCTTCCCGCCCCTTTCTGGCCAGCTCCGCCCTGGAGCTTCCCGGCGGGCTC	179	2	n	3.8e-06	++++++++ +
chr7:44986452-44986988	376	CATAAGGAAGCAGGCAGAGCTTTGGGCAGCAGCAACTGGCTCTTAGGAATGTCAATCATCACCATTCTGTGGATT	424	3	n	7.4e-06	+++++++++
chr9:109082358-109082693	1	TCACCAGCCCCTGATCGTATGCCGGAAACAGGACTTACAGCCTTCGCTTATGCCGCACCTATGCGTGGCCCCTGA TTGGCTGCTAGGCAGGAAGTCACCCTCACGTATTTTAAAGGATGCCTTCAGGGGCGGGTGCTGACCGGTCAGGGG	69	1	y	5.9e-07	++ +++++++++++
chr9:109082358-109082693	1	TCACCAGCCCCTGATCGTATGCCGGAAACAGGACTTACAGCCTTCGCTTATGCCGCACCTATGCGTGGCCCCTGA TTGGCTGCTAGGCAGGAAGTCACCCTCACGTATTTTAAAGGATGCCTTCAGGGGCGGGTGCTGACCGGTCAGGGG	123	2	y	9.5e-06	++++++++
chr9:109082358-109082693	151	TCAATTGAGTGGCAGACGCGGGGCTTTCTGCTGGAGCCTAATAGGCTTAGGCAATTCAGGTACGGGGCGGAAGGC	156	3	y	2.4e-05	+++ ++ +++
chr11:96977401-96978188	1	TCTAACGCCCCCTTCCGGGTGCCTCCGCCCGGCCGGCCAGCCGCGCTCCTCCTCCGGGCGGGAATCCTTCCTCCC CCGCCCCTCCCGTAGCCGGGCCCCGGCGCCAGTCCCAGTCCCAGGGGGGCACCCCCGGTTCCGGCCTCCCCTCCC	75	2	n	1.2e-06	++++++++ ++
chr11:96977401-96978188	226	TTACGACATCTTCCTCCCTGGCCTCCGCCGCCTCCGCCGCCACCGAGAGCCTGACACCGCCCGCCTAGCACCCGC	285	2	n	8.8e-05	++++++ +
chr11:96977401-96978188	376	CATTTTCAACCAATCATTGGGAAGCATCTAGAGTGACGTTGGTCTGGCCAATAGAACTGTGAAGTGTCATTGATA GACGGTAGGAGTCGCCAACCGGAAATCAACGGGGGAATGAACGACGTATCCTTTAGCCAACTGGCGGGAGGCAAA	382	1	n	4.6e-05	++++++++++ ++
chr11:96977401-96978188	376	CATTTTCAACCAATCATTGGGAAGCATCTAGAGTGACGTTGGTCTGGCCAATAGAACTGTGAAGTGTCATTGATA GACGGTAGGAGTCGCCAACCGGAAATCAACGGGGGAATGAACGACGTATCCTTTAGCCAACTGGCGGGAGGCAAA	446	3	y	9.2e-05	++++ +++ +
chr11:96977401-96978188	526	GTCCCGCCTGCTAGGAGGTTGATGGACAGCAACAGGAAGCTGGGTGAGGAGGGGCTTAGCCGAGAAGTGTTTTTG	528	2	n	8.4e-05	++++++ ++
chr11:96977401-96978188	526	GTCCCGCCTGCTAGGAGGTTGATGGACAGCAACAGGAAGCTGGGTGAGGAGGGGCTTAGCCGAGAAGTGTTTTTG	545	3	y	1.4e-05	++++ +++++
chr11:96977401-96978188	601	TATTGGTCGTAATTGACCTTCCACCCACCTCTAACCCAGCAGATAAGTGATAGATCTGCCCTAAAGCCAATCAGA AGTGCTACTGTGAAATGCCCCGTAAAGAGCTTATACATCTCTCAATACAGTCTGGCATGGTGAGTCTCAAGTGTA	624	2	n	7.7e-05	+++ ++ +
chr11:96977401-96978188	601	TATTGGTCGTAATTGACCTTCCACCCACCTCTAACCCAGCAGATAAGTGATAGATCTGCCCTAAAGCCAATCAGA AGTGCTACTGTGAAATGCCCCGTAAAGAGCTTATACATCTCTCAATACAGTCTGGCATGGTGAGTCTCAAGTGTA	664	1	n	5.9e-07	+++++++++++++
chr7:45916638-45916994	151	GAGTAGCCAATCGGGGCTGCTGGCAGTTGCTAGGCAGCCTCCTGAGGCCAACCAATCAAAGCCGTTTATTTCAAC	154	1	n	4.1e-07	+++++++++++ ++
chr7:45916638-45916994	151	GAGTAGCCAATCGGGGCTGCTGGCAGTTGCTAGGCAGCCTCCTGAGGCCAACCAATCAAAGCCGTTTATTTCAAC	199	1	n	8.2e-07	++++++++++ +++
chr7:45916638-45916994	226	TTGTTATTTTATTTCTTAGACCCGCCTCTGGCGGGAACCTCACCAAGGTCGCTGGAGGAGGCGGGACTTGGGGAG	246	2	n	2.2e-05	++++++ +
chr7:45916638-45916994	226	TTGTTATTTTATTTCTTAGACCCGCCTCTGGCGGGAACCTCACCAAGGTCGCTGGAGGAGGCGGGACTTGGGGAG	280	2	y	1.1e-06	++++ ++++++
chr14:14702779-14703249	1	GAAACTGACCTGGGGGGCGGGGGAGGCGACAGACCCTTCCGAGCTGCTGATTGGCTGATACGAATGTCTGTCTTC	11	2	y	9.3e-07	++++++++++
chr14:14702779-14703249	1	GAAACTGACCTGGGGGGCGGGGGAGGCGACAGACCCTTCCGAGCTGCTGATTGGCTGATACGAATGTCTGTCTTC	44	1	y	8.2e-07	++ +++++++++++
chr14:14702779-14703249	151	GCAGGGGGCGTGCTCCGGGGGGGGCGTGCCGGAGCGCGccccgcccccgcccccgcccccgccccccagccccgc cccccgccccgcccccgcccGGGCGCCGCTGCCTCCTCCGCGCCGCGTCCTCTGCCCGTCTCAGTCCTCGCGGCA	152	2	y	5.1e-05	++++++++ +
chr14:14702779-14703249	151	GCAGGGGGCGTGCTCCGGGGGGGGCGTGCCGGAGCGCGccccgcccccgcccccgcccccgccccccagccccgc cccccgccccgcccccgcccGGGCGCCGCTGCCTCCTCCGCGCCGCGTCCTCTGCCCGTCTCAGTCCTCGCGGCA	168	2	y	3.9e-05	+++++++++ +
chr14:14702779-14703249	151	GCAGGGGGCGTGCTCCGGGGGGGGCGTGCCGGAGCGCGccccgcccccgcccccgcccccgccccccagccccgc cccccgccccgcccccgcccGGGCGCCGCTGCCTCCTCCGCGCCGCGTCCTCTGCCCGTCTCAGTCCTCGCGGCA	190	2	n	4.1e-07	+++++++++ +
chr14:14702779-14703249	151	GCAGGGGGCGTGCTCCGGGGGGGGCGTGCCGGAGCGCGccccgcccccgcccccgcccccgccccccagccccgc cccccgccccgcccccgcccGGGCGCCGCTGCCTCCTCCGCGCCGCGTCCTCTGCCCGTCTCAGTCCTCGCGGCA	202	2	n	4.1e-07	+++++++++ +
chr14:14702779-14703249	151	GCAGGGGGCGTGCTCCGGGGGGGGCGTGCCGGAGCGCGccccgcccccgcccccgcccccgccccccagccccgc cccccgccccgcccccgcccGGGCGCCGCTGCCTCCTCCGCGCCGCGTCCTCTGCCCGTCTCAGTCCTCGCGGCA	221	2	n	4.1e-07	++++++++++
chr14:14702779-14703249	151	GCAGGGGGCGTGCTCCGGGGGGGGCGTGCCGGAGCGCGccccgcccccgcccccgcccccgccccccagccccgc cccccgccccgcccccgcccGGGCGCCGCTGCCTCCTCCGCGCCGCGTCCTCTGCCCGTCTCAGTCCTCGCGGCA	233	2	n	4.1e-07	+++++++++ +
chr14:14702779-14703249	376	CCAGCGCTCCGCACAGGGTCTCCCTCCGCGTGCCCGTCTCTGCTGCGGTCGCGGCCTCTCAGAGCTCCGGGGCGG GCCATGGAGGCAGACGGGGC	441	2	y	2.6e-05	++++++++
chr5:138622755-138623017	1	AGAACCTGAAGCTCTGTCCAATCAGAGGCCCTAGCCTCAAGACGTGCCCAATCAGACACACAAACGGAGGGTAGG GGCGGGCTTTGGCTGTCAACCAGCCTTTGTCTGGGACCCTCCATATTGGAATCACTGTATGCTGCTAGGGAAGCT	15	1	n	2.3e-06	++ +++++++++++
chr5:138622755-138623017	1	AGAACCTGAAGCTCTGTCCAATCAGAGGCCCTAGCCTCAAGACGTGCCCAATCAGACACACAAACGGAGGGTAGG GGCGGGCTTTGGCTGTCAACCAGCCTTTGTCTGGGACCCTCCATATTGGAATCACTGTATGCTGCTAGGGAAGCT	71	2	y	3.8e-06	+ ++++++++
chr5:138622755-138623017	1	AGAACCTGAAGCTCTGTCCAATCAGAGGCCCTAGCCTCAAGACGTGCCCAATCAGACACACAAACGGAGGGTAGG GGCGGGCTTTGGCTGTCAACCAGCCTTTGTCTGGGACCCTCCATATTGGAATCACTGTATGCTGCTAGGGAAGCT	88	3	n	3.3e-05	+++++++ ++
chr8:26158018-26158919	1	TGCAGTCAGGATCCCAAACAAACGCGCTCTCTTCCGGCCAAGGCGCAGAGGGCCCACCCACTTCCGCACTGCTGA	53	2	n	3.2e-05	+++ +++ ++
chr8:26158018-26158919	76	CCACGCCCCACAGGCGCGCCTCGCCCCAGCCAATGGTCAGCTTCCCTGGGAACGTTACCTTCAGCCAATCAGAGA	102	1	n	5.5e-05	++++++++ + ++
chr8:26158018-26158919	76	CCACGCCCCACAGGCGCGCCTCGCCCCAGCCAATGGTCAGCTTCCCTGGGAACGTTACCTTCAGCCAATCAGAGA	137	1	n	1.2e-07	+++++++++++++
chr8:26158018-26158919	226	TGTGGTCCTTCTGCTAAAGCAAACCCCACAACGGACAGGGTAGTCACTCCCCCACCCCAACCCCCACCCCACGGC	276	2	n	4.5e-05	+++ ++++ +
chr8:26158018-26158919	226	TGTGGTCCTTCTGCTAAAGCAAACCCCACAACGGACAGGGTAGTCACTCCCCCACCCCAACCCCCACCCCACGGC	288	2	n	3.9e-05	+++ ++++ +
chr8:26158018-26158919	526	GGCCGCGGCGACAGgggcgcgcgggcgggtgggggcggagcccggcgcgtggccgcgcgagacctggaggaggcg gggcgggcgctcgggcgctcagggcggcggacgggccgggccggcgggggcgggGACCCACGGGGGCGCGTCCCC	544	2	y	4.5e-05	+ + +++++++
chr8:26158018-26158919	526	GGCCGCGGCGACAGgggcgcgcgggcgggtgggggcggagcccggcgcgtggccgcgcgagacctggaggaggcg gggcgggcgctcgggcgctcagggcggcggacgggccgggccggcgggggcgggGACCCACGGGGGCGCGTCCCC	592	2	y	1.1e-06	++++ ++++++
chr8:26158018-26158919	526	GGCCGCGGCGACAGgggcgcgcgggcgggtgggggcggagcccggcgcgtggccgcgcgagacctggaggaggcg gggcgggcgctcgggcgctcagggcggcggacgggccgggccggcgggggcgggGACCCACGGGGGCGCGTCCCC	644	2	y	4.1e-07	+ +++++++++
chr8:26158018-26158919	676	GTGGCTGCGCGCCCCCGCTGCGCATCCCGGGCGCGCGGCGTCTCCGTTGGTCTTGGCCTCCGCTGGGGGCTGAGA	683	2	n	8.8e-05	+ +++++++ +
chr8:26158018-26158919	751	CCGCGCGCCTTCGCGCTCGCGGAGGGTTTCCGGCGGGCGGGCAAGCGAGCGAGCGACGCCCAGAAGCCTCTCGCA	781	2	y	4.5e-05	++ +++++++
chr11:101171374-101171629	151	TGTCTCTGGCTGAGTGACAGTAGGGAGGGGCGGGGGGGGGGGGGACTGGGGAGGGAGCTTCTGAGGTCGGACACG	161	3	y	2e-06	+++ ++++++
chr11:101171374-101171629	151	TGTCTCTGGCTGAGTGACAGTAGGGAGGGGCGGGGGGGGGGGGGACTGGGGAGGGAGCTTCTGAGGTCGGACACG	174	2	y	1.2e-06	++ ++++++++
chr19:41981092-41981759	76	TCTCCGCGCACGCGCCTCCATGGCCAATAGTTGGGCGCAGACTTCAGGGGCGGGGCACCTCCAGGTCACGTGCCT	119	2	y	9.5e-06	++++++++
chr19:41981092-41981759	151	GCCGGCTCTGGGCCAGGCAGTCCCTTCAGGGACCTAACGGCCCCTCCCCAGAGGGCGGGGCCTGGGCCGGGGCGC	199	2	y	3.3e-06	++ +++++++
chr19:41981092-41981759	301	CGGGAGACGGGCGACAGGGCGGGCACCTGGCTGGGTGGGGCCGAGGGGCGGTACGCATCCTGGGAAAAGCCAATG AGAAAACCAGACCCGGCCCGAGGGGCGGTGCCGTCGGTCACATGCGCACCTGGGGCGGCTGGCGACCGTGGCGCG	313	2	y	2e-05	++ +++++++
chr19:41981092-41981759	301	CGGGAGACGGGCGACAGGGCGGGCACCTGGCTGGGTGGGGCCGAGGGGCGGTACGCATCCTGGGAAAAGCCAATG AGAAAACCAGACCCGGCCCGAGGGGCGGTGCCGTCGGTCACATGCGCACCTGGGGCGGCTGGCGACCGTGGCGCG	329	2	y	7.1e-05	++ +++ +++
chr19:41981092-41981759	301	CGGGAGACGGGCGACAGGGCGGGCACCTGGCTGGGTGGGGCCGAGGGGCGGTACGCATCCTGGGAAAAGCCAATG AGAAAACCAGACCCGGCCCGAGGGGCGGTGCCGTCGGTCACATGCGCACCTGGGGCGGCTGGCGACCGTGGCGCG	367	1	n	4.3e-06	+++++++ ++++
chr19:41981092-41981759	451	GCCACCCCAAGCGGGAGGAAGGGAgcggggccgggccggggcggggTTAGGCAGGTGAGTGACAGGCTCCGGGGG	485	2	y	1.1e-05	+ ++++++++
chr19:41981092-41981759	451	GCCACCCCAAGCGGGAGGAAGGGAgcggggccgggccggggcggggTTAGGCAGGTGAGTGACAGGCTCCGGGGG	506	3	y	2e-06	+++ ++++++
chr11:101095367-101095720	76	TGAGGAGGCGGGACCTTAACGCTGATTGGCTAAGGAAGAAGCCTGCCGGAAGAGTACCCGGACCTTCCGGGACCC	77	2	y	1.1e-06	++++ ++++++
chr11:101095367-101095720	76	TGAGGAGGCGGGACCTTAACGCTGATTGGCTAAGGAAGAAGCCTGCCGGAAGAGTACCCGGACCTTCCGGGACCC	94	1	y	5.9e-07	+ +++++++++++
chr19:55741634-55741874	1	AGCACAGGCCGCAccccgcgcgcctcccgcggccccggcccgccccgcTCCCTCTCCCGGCGCCCAAAGGATCAT	39	2	n	1.7e-05	++++++++ +
chr19:55741634-55741874	76	TGTTGGCCGCCCCCGCCCCGCCCACCCCGGCTGTTTATTTATGCACACGTCACCGGGGAGGCCCCGCCCCCTGGC	92	2	n	2.5e-06	+++++++ +++
chr19:55741634-55741874	76	TGTTGGCCGCCCCCGCCCCGCCCACCCCGGCTGTTTATTTATGCACACGTCACCGGGGAGGCCCCGCCCCCTGGC	109	4	y	2.9e-05	++ +++++++
chr19:55741634-55741874	76	TGTTGGCCGCCCCCGCCCCGCCCACCCCGGCTGTTTATTTATGCACACGTCACCGGGGAGGCCCCGCCCCCTGGC	138	2	n	2.6e-07	++++++++++
chr19:55741634-55741874	151	ATCTCATTAAGGCGAGTGTGTTCCTCTCGCCCTGTCAATAATCTCCGCTCCCAGACTACTCCGTTCCTCCGGATT	182	3	n	7.8e-05	++++++++ +
chr17:17294182-17294519	76	CCTGTCACTCAAGATTTACTGGCCAATCACAGCATCAAGGAGGATCTGCCAGTCATAAGAGGAGGGTGGTTTTTC	77	3	n	2e-06	++++++ +++
chr17:17294182-17294519	76	CCTGTCACTCAAGATTTACTGGCCAATCACAGCATCAAGGAGGATCTGCCAGTCATAAGAGGAGGGTGGTTTTTC	95	1	n	4.1e-07	++++++++++ +++
chr17:17294182-17294519	76	CCTGTCACTCAAGATTTACTGGCCAATCACAGCATCAAGGAGGATCTGCCAGTCATAAGAGGAGGGTGGTTTTTC	121	3	n	2.4e-05	+++ ++ +++
chr17:17294182-17294519	151	CGGATGCATTTTGCTGGTTCCCCGTGAGATCTGCCAGTCAAAAGCGGAGGGTGGTTCTTCCGGAATGCATTTTCC	181	3	n	2.4e-05	+++ ++ +++
chr17:17294182-17294519	226	TGTTTCCATGTGGGATCTGCCAGTCATAAGAGGAGGGTGTTTCTTCCGGAATCATTTTCGCTGGTTCCCTGTAAT	242	3	n	2.4e-05	+++ ++ +++
chr11:43681706-43682161	1	TAAACCAATCCTAAAGCGGTATTTCCCCTACTAACCAATAGATACAGGCTGTAAGCACAGGGCGCCGCTTTTGCC	32	1	n	6.6e-05	++++++++ + ++
chr11:43681706-43682161	76	ATCCTTCAGCCCGCCCCTCAAACTCCTTTTAGATTCTCCACTTGACAACTCACCTGACCAATGGGAAGTTCCTAC	85	2	n	4.7e-06	++++++++ +
chr11:43681706-43682161	76	ATCCTTCAGCCCGCCCCTCAAACTCCTTTTAGATTCTCCACTTGACAACTCACCTGACCAATGGGAAGTTCCTAC	130	1	n	6.7e-06	++++++++ +++++
chr11:43681706-43682161	151	TCTGAGGGAGGGGGCGGGACTCAGCCCGCGACAGACGGCTCCTTCTGACCAATGGGTTGACAGAAGTGCGGAAGG	158	2	y	9.2e-08	+++++++++++
chr11:43681706-43682161	151	TCTGAGGGAGGGGGCGGGACTCAGCCCGCGACAGACGGCTCCTTCTGACCAATGGGTTGACAGAAGTGCGGAAGG	196	1	n	9.9e-05	++++++++ ++ +
chr11:43681706-43682161	226	GGGTGGAAGGCGGAGCCAATGGCGCGGTGCCAATCACGAGCATCAGGGAAAGGGCGGGACGAGAGTGTTAGCGGG	273	2	y	6.8e-06	++ +++++++
chr1:184034187-184034566	1	CGGGCTAGCACTTTTAAGTTTTTGATTGGTTGCCAATGACATCACCACCCGCGCGTTCTAACACACCAAACCCAC	19	1	y	4.3e-06	++ ++++++++++
chr1:184034187-184034566	76	TAGCGGGTCCGAGCCGGCCTCCCTCCCAAGGCGAGGCCTCGCCCCTTTCTCCGCCCTCCTCGGCTTCTTATTGGT CAGAGACCACTGTGATGTAGCGGGCGGCAGCCTCTGGGTCTTCATTGGCGTATCGCGCCGTCGCTCGGAGGCAAC	139	1	y	6.1e-06	+++++ ++++++++
chr1:184034187-184034566	76	TAGCGGGTCCGAGCCGGCCTCCCTCCCAAGGCGAGGCCTCGCCCCTTTCTCCGCCCTCCTCGGCTTCTTATTGGT CAGAGACCACTGTGATGTAGCGGGCGGCAGCCTCTGGGTCTTCATTGGCGTATCGCGCCGTCGCTCGGAGGCAAC	188	1	y	9e-05	++ + ++++++
chr1:184034187-184034566	226	CCCGCCCCCTCCAAAGCTTACATTTACGCTGTAGCAAAAGAGAAAGTAACTCTGTGTTGCTGCTGGGGATCAATG	226	2	n	9.2e-08	+++++++++++
chr8:94214370-94214766	1	AGGACTGTCAACTCCAACCACGTGGGCGGGAGCAGGGCGGAGCTCCTTGACTTACTTGTAGCGACAgccccgcct ccggccccgccccgcccccACGCCTGTGTCCTCTTGCGGGTCTCCATAAAGTTCATTTGGCGGCGCAACGCGCAG	20	2	y	1.7e-05	+ +++++++
chr8:94214370-94214766	1	AGGACTGTCAACTCCAACCACGTGGGCGGGAGCAGGGCGGAGCTCCTTGACTTACTTGTAGCGACAgccccgcct ccggccccgccccgcccccACGCCTGTGTCCTCTTGCGGGTCTCCATAAAGTTCATTTGGCGGCGCAACGCGCAG	69	2	n	7.7e-06	++++++ ++
chr8:94214370-94214766	1	AGGACTGTCAACTCCAACCACGTGGGCGGGAGCAGGGCGGAGCTCCTTGACTTACTTGTAGCGACAgccccgcct ccggccccgccccgcccccACGCCTGTGTCCTCTTGCGGGTCTCCATAAAGTTCATTTGGCGGCGCAACGCGCAG	86	2	n	7.3e-07	+++++++++ +
chr8:94214370-94214766	151	GGGCTTCTGGGAGCTTACTGCCTCAGCCAATCAGGAGGCGCGGGCGAGCGGCGCGAGAAGCGGCGGCGGCGGCGT	174	1	n	9.6e-07	+++++++++++ ++
chr18:67449143-67449603	76	CACGCCCTCGGGTCCGGAGAGGGGGAGGGACGCGTAACCGGGCTGGAGGCGGGAGCAAAAGGAAAGTGGGGCGGA	118	2	y	9.5e-06	++ ++++++
chr18:67449143-67449603	151	GTGAAGGGCGTGGCCAGCCTATTAAAGAGCCGGAGGGGCGGGGTTGGGTGGGGCCAAAGGAGGAGTGGCGGGGTT	182	2	y	1.2e-06	++ ++++++++
chr18:67449143-67449603	226	AGGGCGGAGTTGGAAGACTGTGGAGGGGCGGGGCTAGAGATGGTAGCCAATGAGAACTTTGGAGGCGAGGTCAAG GCGGGGTAAAGCTGGTGGGGGCGGGCAGGAGGCGGGGCCGAAAGGGAATTGCGGCAGGTGAGGCGGGTCTGAAGG	247	2	y	1.2e-06	++ ++++++++
chr18:67449143-67449603	226	AGGGCGGAGTTGGAAGACTGTGGAGGGGCGGGGCTAGAGATGGTAGCCAATGAGAACTTTGGAGGCGAGGTCAAG GCGGGGTAAAGCTGGTGGGGGCGGGCAGGAGGCGGGGCCGAAAGGGAATTGCGGCAGGTGAGGCGGGTCTGAAGG	269	1	n	1e-07	++++++++ +++++
chr18:67449143-67449603	226	AGGGCGGAGTTGGAAGACTGTGGAGGGGCGGGGCTAGAGATGGTAGCCAATGAGAACTTTGGAGGCGAGGTCAAG GCGGGGTAAAGCTGGTGGGGGCGGGCAGGAGGCGGGGCCGAAAGGGAATTGCGGCAGGTGAGGCGGGTCTGAAGG	295	2	y	7.7e-05	+ ++++++
chr18:67449143-67449603	226	AGGGCGGAGTTGGAAGACTGTGGAGGGGCGGGGCTAGAGATGGTAGCCAATGAGAACTTTGGAGGCGAGGTCAAG GCGGGGTAAAGCTGGTGGGGGCGGGCAGGAGGCGGGGCCGAAAGGGAATTGCGGCAGGTGAGGCGGGTCTGAAGG	315	2	y	7.3e-07	+ +++++++++
chr18:67449143-67449603	226	AGGGCGGAGTTGGAAGACTGTGGAGGGGCGGGGCTAGAGATGGTAGCCAATGAGAACTTTGGAGGCGAGGTCAAG GCGGGGTAAAGCTGGTGGGGGCGGGCAGGAGGCGGGGCCGAAAGGGAATTGCGGCAGGTGAGGCGGGTCTGAAGG	326	2	y	2.5e-06	+++ ++++++
chr18:67449143-67449603	226	AGGGCGGAGTTGGAAGACTGTGGAGGGGCGGGGCTAGAGATGGTAGCCAATGAGAACTTTGGAGGCGAGGTCAAG GCGGGGTAAAGCTGGTGGGGGCGGGCAGGAGGCGGGGCCGAAAGGGAATTGCGGCAGGTGAGGCGGGTCTGAAGG	357	2	y	1.9e-05	++ + ++++++
chr14:31128892-31129249	76	CTGGTCGGCTCCGCCAATCAGAATGTGGCGGGACTCTCAGACTCTCCAATCAGAGTGCTGTTTGAGCGCGCGTGC	86	1	n	9.2e-06	+ +++++++++++
chr14:31128892-31129249	76	CTGGTCGGCTCCGCCAATCAGAATGTGGCGGGACTCTCAGACTCTCCAATCAGAGTGCTGTTTGAGCGCGCGTGC	118	1	n	2.5e-05	+ ++++++++++
chr14:31128892-31129249	151	TCTGTGAGGCTGAGTCGGTCTGAAGAAGCCTGCGCACGCGCCTAGATTCTGGAGACGGAGAACCTTCGGGGGGCG GGGTCTCCAACGTGGCGTGGCGGCCCCGCCCTCGACCTGCTCTCACTGCTGAGGCTCAGAGTTTACTGCCGCGCC CCCTACTCTGCCATCGCCATCTTTTTTTGTAATACCCTGACCGAGGTGTCGACCCTT	217	2	y	4.1e-07	++++++++++
chr14:31128892-31129249	151	TCTGTGAGGCTGAGTCGGTCTGAAGAAGCCTGCGCACGCGCCTAGATTCTGGAGACGGAGAACCTTCGGGGGGCG GGGTCTCCAACGTGGCGTGGCGGCCCCGCCCTCGACCTGCTCTCACTGCTGAGGCTCAGAGTTTACTGCCGCGCC CCCTACTCTGCCATCGCCATCTTTTTTTGTAATACCCTGACCGAGGTGTCGACCCTT	250	2	n	1.3e-05	+++++++ +
chr14:31128892-31129249	151	TCTGTGAGGCTGAGTCGGTCTGAAGAAGCCTGCGCACGCGCCTAGATTCTGGAGACGGAGAACCTTCGGGGGGCG GGGTCTCCAACGTGGCGTGGCGGCCCCGCCCTCGACCTGCTCTCACTGCTGAGGCTCAGAGTTTACTGCCGCGCC CCCTACTCTGCCATCGCCATCTTTTTTTGTAATACCCTGACCGAGGTGTCGACCCTT	295	2	n	9.1e-05	+ ++++++++
chr11:115276860-115277460	76	GCTGAGCGCAGGTCCAGCAGCCCGCCGAGGACGCTCCTCTGGACCCGCCCATCACTGGAGCCCCGCCCCAAGCCT	119	2	n	2.4e-05	+++++++ +
chr11:115276860-115277460	76	GCTGAGCGCAGGTCCAGCAGCCCGCCGAGGACGCTCCTCTGGACCCGCCCATCACTGGAGCCCCGCCCCAAGCCT	137	2	n	2.2e-05	++++++++
chr11:115276860-115277460	151	CGCCTCCCGCTTGCTTAGAAACATCAACTTGGAGACTTCACCAAGATTTCCGAAATAACCACGCCCCCAAAGAGA	210	2	n	9.1e-05	+ +++++++
chr11:115276860-115277460	226	ACCATGCCCCCATCTCGCCAAGGCCCCGCCCCCAGAACGTCCAATCCTCAAAAGCTTATCAAATTTCTCCGGTCT	250	2	n	1.9e-06	+++++++++
chr11:115276860-115277460	376	AGAAGGGAGCCAATTGGAAAGGAGCTTACTTTATGTAAAGCTTGCCGCTCGCTGATGACGCAATGCCCCGTTGTC	382	1	n	9e-05	+++++++ ++++
chr11:115276860-115277460	451	GTTGTTTGAGTGATTTTTGTATCAGCCAATCAGAAGGCCAGAGCCCGGAAGTCTCGTGTATCCGCTATTCTTGAC	473	1	n	1e-07	++++++++++++++
chr14:52244469-52244800	1	TCTCCAGCACCAGTTCCCCTCCTTCTACGCAACCTAACTTGATGCGCTTGCCCGCCCCACACTCTCATTGGCTAA	61	1	y	4.8e-07	++++ ++++++++
chr14:52244469-52244800	76	CACGGACTGCCACTCAACCAAAGACGCAGAAACGCAAAACAGCGCAAGGGCGGGACTAAAAGCAGCTCCCTTCCC	82	3	n	2.4e-05	+++ ++ +++
chr14:52244469-52244800	76	CACGGACTGCCACTCAACCAAAGACGCAGAAACGCAAAACAGCGCAAGGGCGGGACTAAAAGCAGCTCCCTTCCC	119	2	y	1.5e-05	+ +++++++
chr5:73256583-73257019	1	CCGACGGGCGCCCGGCAGTGCTGCGAGCTCTGCCCACCCCTTCTCTGCCCCGCCCACCCACTCGCCTTCCTGATT GGCGAAGGATACTACACCAGGAACAGCGGTCCTCGCCCTCCACTGGCCGGCCTCCCCGCCGCTCAGAGTTTCCCC ACCTTCGCCCCGCCCCCTCCCCCGGGTTGGACCTACCTCTAATCACTCTCGGTCCTCGCCTCCAACGTTGCTTTG	33	2	n	8.5e-06	+++ ++++ ++
chr5:73256583-73257019	1	CCGACGGGCGCCCGGCAGTGCTGCGAGCTCTGCCCACCCCTTCTCTGCCCCGCCCACCCACTCGCCTTCCTGATT GGCGAAGGATACTACACCAGGAACAGCGGTCCTCGCCCTCCACTGGCCGGCCTCCCCGCCGCTCAGAGTTTCCCC ACCTTCGCCCCGCCCCCTCCCCCGGGTTGGACCTACCTCTAATCACTCTCGGTCCTCGCCTCCAACGTTGCTTTG	49	2	n	2.5e-06	+++++++ +++
chr5:73256583-73257019	1	CCGACGGGCGCCCGGCAGTGCTGCGAGCTCTGCCCACCCCTTCTCTGCCCCGCCCACCCACTCGCCTTCCTGATT GGCGAAGGATACTACACCAGGAACAGCGGTCCTCGCCCTCCACTGGCCGGCCTCCCCGCCGCTCAGAGTTTCCCC ACCTTCGCCCCGCCCCCTCCCCCGGGTTGGACCTACCTCTAATCACTCTCGGTCCTCGCCTCCAACGTTGCTTTG	67	1	y	1.5e-05	+ +++++++++ +
chr5:73256583-73257019	1	CCGACGGGCGCCCGGCAGTGCTGCGAGCTCTGCCCACCCCTTCTCTGCCCCGCCCACCCACTCGCCTTCCTGATT GGCGAAGGATACTACACCAGGAACAGCGGTCCTCGCCCTCCACTGGCCGGCCTCCCCGCCGCTCAGAGTTTCCCC ACCTTCGCCCCGCCCCCTCCCCCGGGTTGGACCTACCTCTAATCACTCTCGGTCCTCGCCTCCAACGTTGCTTTG	148	2	n	5.4e-05	+++ ++ + +
chr5:73256583-73257019	1	CCGACGGGCGCCCGGCAGTGCTGCGAGCTCTGCCCACCCCTTCTCTGCCCCGCCCACCCACTCGCCTTCCTGATT GGCGAAGGATACTACACCAGGAACAGCGGTCCTCGCCCTCCACTGGCCGGCCTCCCCGCCGCTCAGAGTTTCCCC ACCTTCGCCCCGCCCCCTCCCCCGGGTTGGACCTACCTCTAATCACTCTCGGTCCTCGCCTCCAACGTTGCTTTG	159	2	n	9.2e-08	+++++++++++
chr5:73256583-73257019	226	GAGAACTGGCAGTCACGGCTCACCCTCCCGCCTCCGGAAAGCTAACTTTATTTTTATTGGTAGAAAGACATCTTC	231	3	n	9.2e-05	+++ ++ +++
chr5:73256583-73257019	226	GAGAACTGGCAGTCACGGCTCACCCTCCCGCCTCCGGAAAGCTAACTTTATTTTTATTGGTAGAAAGACATCTTC	252	2	n	7.7e-06	++++++ ++
chr5:73256583-73257019	301	CTGTGCACCTGATTGGGTAAGAAAAGGCAAGTCTGCACGCCCCTTACCTTTTATCACTCTCCCTGGACGGCTGAA	306	1	y	4.6e-05	+ ++++++++ ++
chr5:73256583-73257019	301	CTGTGCACCTGATTGGGTAAGAAAAGGCAAGTCTGCACGCCCCTTACCTTTTATCACTCTCCCTGGACGGCTGAA	336	2	n	9.5e-05	+ ++++++ +
chr8:72492630-72493092	1	CGGGCAGGGGGCGGGACAGCCCTGGAGGGCGCGCCGGCAGACGCCGCTCACCATTGGCCCCTGGCCCTTGCGTCA	5	2	y	2.6e-07	++++++++++
chr8:72492630-72493092	76	TCGCCGCTCGCCATTGGCCACCGCCCCATACGTCATCGTCGCGCGTCCGCCGACGCGCCCGTACACGTCGTCGGC	82	1	y	3.3e-05	++ + ++++++++
chr8:72492630-72493092	151	GAGGGCCCTACCCTCACTTAAACGCTTTCCGGGAGGGGGCGGGGCTAAGCCCGGAAGGCGGGCCGTAGGGCCCGC	183	2	y	9.2e-08	+++++++++++
chr8:72492630-72493092	151	GAGGGCCCTACCCTCACTTAAACGCTTTCCGGGAGGGGGCGGGGCTAAGCCCGGAAGGCGGGCCGTAGGGCCCGC	202	2	y	1.7e-05	++ ++++++
chr8:72492630-72493092	226	GGGTGGGTTAAGCGCGTTACGTTCTCTCCGGTGACTGGCAGGACTCCGTGGGAGGTGCCGGGCGACGCGGGCCCG CCCACTTGAGGCTGTGGAAGCCGCGTGCCTGGGGCGTAGACAGGGCTTAGATCTTTTAGAAGAAAAGAAACCGAT	257	3	y	2.4e-05	+++ ++ +++
chr8:72492630-72493092	226	GGGTGGGTTAAGCGCGTTACGTTCTCTCCGGTGACTGGCAGGACTCCGTGGGAGGTGCCGGGCGACGCGGGCCCG CCCACTTGAGGCTGTGGAAGCCGCGTGCCTGGGGCGTAGACAGGGCTTAGATCTTTTAGAAGAAAAGAAACCGAT	297	2	n	7.7e-06	+++++++ ++
chr5:124327529-124328280	1	GCAGGGCAGGACACTCACGCCCCTTGCAAAGGCAGCAATCCGATTGGGCCTCACTGATGTCACTCAAGGGCACGA	16	2	n	8.4e-05	+ ++++++ +
chr5:124327529-124328280	1	GCAGGGCAGGACACTCACGCCCCTTGCAAAGGCAGCAATCCGATTGGGCCTCACTGATGTCACTCAAGGGCACGA	57	3	n	2.7e-05	+++++ +++
chr5:124327529-124328280	301	GCCTCACGCGACCGTTAAATTCCAAGGAACGTGCGCGCGCCCGGCGCCTCAGCCGCGATTGGCTGCTCGGAAGAG	352	1	y	5.4e-06	++ ++++++++++
chr5:124327529-124328280	451	AGAGGGCAGGGCGACGCCGGAGGCCTGAGGGGGCGGGGCTCTAGGGCCAAGACCTCTGCTGATTGGTTCTCTGGA	477	2	y	9.2e-08	+++++++++++
chr5:124327529-124328280	451	AGAGGGCAGGGCGACGCCGGAGGCCTGAGGGGGCGGGGCTCTAGGGCCAAGACCTCTGCTGATTGGTTCTCTGGA	506	1	y	6.7e-06	++ ++++++++++
chr10:76531369-76531772	1	TGCCCCTCCCACAGGCCGTCCTCGCCCACAGGCCGGCCTCTTTCATAGGCCCCGCCTCCAAAGCGCTTCCCGCCC CGCAGCCACGCCCCCTGGTGCCCTCGCGGCGTCGGGCGGCCCTGCGCCCAGCCACTGTGGTCGCGGTGCGTCTCT	51	2	n	1.3e-05	++++++ ++
chr10:76531369-76531772	1	TGCCCCTCCCACAGGCCGTCCTCGCCCACAGGCCGGCCTCTTTCATAGGCCCCGCCTCCAAAGCGCTTCCCGCCC CGCAGCCACGCCCCCTGGTGCCCTCGCGGCGTCGGGCGGCCCTGCGCCCAGCCACTGTGGTCGCGGTGCGTCTCT	69	2	n	1.5e-05	++++++++ +
chr10:76531369-76531772	1	TGCCCCTCCCACAGGCCGTCCTCGCCCACAGGCCGGCCTCTTTCATAGGCCCCGCCTCCAAAGCGCTTCCCGCCC CGCAGCCACGCCCCCTGGTGCCCTCGCGGCGTCGGGCGGCCCTGCGCCCAGCCACTGTGGTCGCGGTGCGTCTCT	82	2	n	5.1e-05	+ ++++++++
chr10:76531369-76531772	151	CGTGCCCACCTGGTGATGCTCTGATTGGCCGAGCTCGCATCGGCCCACCCAGTAGTTCCGGTCGGCCGAGGCTCG	168	1	y	8.5e-08	++++++++++++++
chr10:76531369-76531772	151	CGTGCCCACCTGGTGATGCTCTGATTGGCCGAGCTCGCATCGGCCCACCCAGTAGTTCCGGTCGGCCGAGGCTCG	194	2	n	9.5e-05	+++ +++ +
chr19:21652824-21653333	76	TCGACTACCGGCTTCACGGAAAGCCTTCCTCGGACCCAAGGTGCAAGTCCGGCTTTCTTCGAATCTAGAACTCCC CCATTGGCTCGAACGCGGCTGTCCATCACGGCGGAGGGACGGAGATTCCCCGTTCCTATTGGCTCTTCTTTTCCG	147	1	y	2.3e-05	+ ++ +++++++
chr19:21652824-21653333	76	TCGACTACCGGCTTCACGGAAAGCCTTCCTCGGACCCAAGGTGCAAGTCCGGCTTTCTTCGAATCTAGAACTCCC CCATTGGCTCGAACGCGGCTGTCCATCACGGCGGAGGGACGGAGATTCCCCGTTCCTATTGGCTCTTCTTTTCCG	169	3	n	1.4e-05	+++++ ++++
chr19:21652824-21653333	76	TCGACTACCGGCTTCACGGAAAGCCTTCCTCGGACCCAAGGTGCAAGTCCGGCTTTCTTCGAATCTAGAACTCCC CCATTGGCTCGAACGCGGCTGTCCATCACGGCGGAGGGACGGAGATTCCCCGTTCCTATTGGCTCTTCTTTTCCG	202	1	y	8.3e-06	+++++ +++++++
chr19:21652824-21653333	226	CAATCCCCGCCTCCTGCCGAACGCTCCCAACCTGTCTCCCGGCTCCGTAGCGTAGCGACTCCGCTGCGCAGTTTG TGATTGGTGGAAGGTGGGCGAGGCCGGTGCCCTGATCGCCTGCAGCCCGGAGCCCGGGTCAGCTTCGGCGCCCTC	231	2	n	2.5e-06	++++++ +++
chr19:21652824-21653333	226	CAATCCCCGCCTCCTGCCGAACGCTCCCAACCTGTCTCCCGGCTCCGTAGCGTAGCGACTCCGCTGCGCAGTTTG TGATTGGTGGAAGGTGGGCGAGGCCGGTGCCCTGATCGCCTGCAGCCCGGAGCCCGGGTCAGCTTCGGCGCCCTC	297	1	y	4e-05	++ ++++++++ +
chr19:21652824-21653333	376	CTCCAGTCACTGAGCAGCTCGAACCGGGccgctcgcccccccgccccccgccgccctcccagctcccgcccgccg	415	2	n	4.1e-07	++++++++++
chr19:21652824-21653333	376	CTCCAGTCACTGAGCAGCTCGAACCGGGccgctcgcccccccgccccccgccgccctcccagctcccgcccgccg	440	2	n	4.5e-05	+++++++ ++
chr19:21652824-21653333	451	cggccgcgcgctccgccgcctggcggccTTCGGAGGTGCCAAGGAAGGCGGGCTGCGGA	492	2	y	2.4e-05	++ ++++++
chr5:105876408-105876724	1	AGGGTCAGGACCCAGGAGCCTGACAACTGCCTCGCTTCCCGCCCCCCTCGCGAGACCCGCCCACCACCCCGCGTC GGCCAATCGGAGGCGGTGCTGCGACGACTGGCAGGCCCGCCCGACCCCGCCCCCAGCCTCGCTGTGGCCTGCGGC	38	2	n	1.1e-06	++++++++++
chr5:105876408-105876724	1	AGGGTCAGGACCCAGGAGCCTGACAACTGCCTCGCTTCCCGCCCCCCTCGCGAGACCCGCCCACCACCCCGCGTC GGCCAATCGGAGGCGGTGCTGCGACGACTGGCAGGCCCGCCCGACCCCGCCCCCAGCCTCGCTGTGGCCTGCGGC	56	2	n	8.5e-06	+++++++ ++
chr5:105876408-105876724	1	AGGGTCAGGACCCAGGAGCCTGACAACTGCCTCGCTTCCCGCCCCCCTCGCGAGACCCGCCCACCACCCCGCGTC GGCCAATCGGAGGCGGTGCTGCGACGACTGGCAGGCCCGCCCGACCCCGCCCCCAGCCTCGCTGTGGCCTGCGGC	75	1	n	9.6e-07	++++++++++++++
chr5:105876408-105876724	1	AGGGTCAGGACCCAGGAGCCTGACAACTGCCTCGCTTCCCGCCCCCCTCGCGAGACCCGCCCACCACCCCGCGTC GGCCAATCGGAGGCGGTGCTGCGACGACTGGCAGGCCCGCCCGACCCCGCCCCCAGCCTCGCTGTGGCCTGCGGC	121	2	n	1.9e-06	+++++++++
chr5:105876408-105876724	301	CGCGgggcgggccgcc	301	2	y	1.1e-05	+ ++++++++
chr11:69098719-69099018	1	CTGATCGCATTGGCTGACTGAGCGGTGTCTGAGGCCCTTCAGCCCAGCACCAGCACCCAAGTCCACGTGCAGGGA	3	1	y	7.3e-05	+ ++ ++++++++
chr11:69098719-69099018	76	TGTGTGTGACACAGCCCTGACCTCAGTGGGGGCCAGTAGCCAATCAGATGCCAGGAAGAGATCCTTAGCCAACCG GGGGCGGGGCCTGCGGCTCTTCGGGCAGAAGGCCAATGAGGGGCAGGGCCTGGCATTATGCAACCCGCCTCCCAG	112	1	n	6.8e-07	++++++++++++ +
chr11:69098719-69099018	76	TGTGTGTGACACAGCCCTGACCTCAGTGGGGGCCAGTAGCCAATCAGATGCCAGGAAGAGATCCTTAGCCAACCG GGGGCGGGGCCTGCGGCTCTTCGGGCAGAAGGCCAATGAGGGGCAGGGCCTGGCATTATGCAACCCGCCTCCCAG	148	2	y	1.5e-06	+++++++++
chr11:69098719-69099018	76	TGTGTGTGACACAGCCCTGACCTCAGTGGGGGCCAGTAGCCAATCAGATGCCAGGAAGAGATCCTTAGCCAACCG GGGGCGGGGCCTGCGGCTCTTCGGGCAGAAGGCCAATGAGGGGCAGGGCCTGGCATTATGCAACCCGCCTCCCAG	180	1	n	1.5e-05	+++++++ ++ ++
chr11:69098719-69099018	76	TGTGTGTGACACAGCCCTGACCTCAGTGGGGGCCAGTAGCCAATCAGATGCCAGGAAGAGATCCTTAGCCAACCG GGGGCGGGGCCTGCGGCTCTTCGGGCAGAAGGCCAATGAGGGGCAGGGCCTGGCATTATGCAACCCGCCTCCCAG	214	2	n	5.3e-06	++++++ +++
chr7:42692779-42693010	1	AGCACCCGCCTCCACTTCTGACTGGCAGGTCAGACTGGAGGCCTTGATTGGTCAGCAAGTCTCGAGTGACATAAG	5	2	n	4.7e-06	++++++ ++ +
chr7:42692779-42693010	1	AGCACCCGCCTCCACTTCTGACTGGCAGGTCAGACTGGAGGCCTTGATTGGTCAGCAAGTCTCGAGTGACATAAG	19	3	y	2.4e-05	+++ ++ +++
chr7:42692779-42693010	1	AGCACCCGCCTCCACTTCTGACTGGCAGGTCAGACTGGAGGCCTTGATTGGTCAGCAAGTCTCGAGTGACATAAG	41	1	y	5.4e-06	++ ++++++++++
chr7:73537730-73538201	1	AGCAAGGATCCAAATCGGTCCGGAAAGAAGCCGCCCACCGGAAAGTCCCGACCAAAATTCCCTTCCTCTGCCCCG CCCCCGGCGCTAGCCGAGCCCATAGAGGAAGCAGCAGACCGACGCACGAGGCCACGCGTCACCGCGTTCTCCCGC CCACTCCGTCTGACGTCAAGGGGCGGGACCAGCCCGACGGCGCCACCGTTGACCCTGCTGTTACCAGGCGCTCAC	72	2	n	1.5e-06	+++++++++
chr7:73537730-73538201	1	AGCAAGGATCCAAATCGGTCCGGAAAGAAGCCGCCCACCGGAAAGTCCCGACCAAAATTCCCTTCCTCTGCCCCG CCCCCGGCGCTAGCCGAGCCCATAGAGGAAGCAGCAGACCGACGCACGAGGCCACGCGTCACCGCGTTCTCCCGC CCACTCCGTCTGACGTCAAGGGGCGGGACCAGCCCGACGGCGCCACCGTTGACCCTGCTGTTACCAGGCGCTCAC	146	2	n	1.9e-06	+++++++ +++
chr7:73537730-73538201	1	AGCAAGGATCCAAATCGGTCCGGAAAGAAGCCGCCCACCGGAAAGTCCCGACCAAAATTCCCTTCCTCTGCCCCG CCCCCGGCGCTAGCCGAGCCCATAGAGGAAGCAGCAGACCGACGCACGAGGCCACGCGTCACCGCGTTCTCCCGC CCACTCCGTCTGACGTCAAGGGGCGGGACCAGCCCGACGGCGCCACCGTTGACCCTGCTGTTACCAGGCGCTCAC	167	2	y	2.1e-06	+ ++++++++
chr7:73537730-73538201	226	ACAGCCAATCAGCACTCGCCGCAAGCGCCGGCCGGCCTTTGAACTCCGCACAGCAACTTCCTGCTGTTTGGCGAG	227	1	n	3.4e-07	+++++++++++ ++
chr6:127330346-127330521	1	CCGGCGGCCGCCCATTGGAGCGGCGCGGCGCCTCTTGGGCCACGCTCAGCCAATCGCAGCGCCGCGGCGCCGGGT	47	1	n	1.1e-06	++++++++++ +++
chr6:127330346-127330521	76	TGCTAACCCGGCTGCGGGTCGGCGGCAGGCGCGGGCCGGGAGCTGTCACCGCTTGTTTCCTGTCCCGGGGGCGGG	140	2	y	1.5e-06	+++++++++
chr6:127330346-127330521	151	CGTGCAGCGGGTGGGAGGCCCAGGC	155	2	y	8.8e-05	++ +++ +++
chr5:136908082-136908274	1	CAGGGTTTCCTGGGCTACTGCGCAGCTGTTCCCGGTCGCCGTGGAAACTGACCAGCCAATCAGAGCATGCGGCCC	53	1	n	1.4e-08	++++++++++++++
chr17:71551881-71552261	1	TACAGAGAGCTGGAGCGGAATAACGGCAGAAGGCGGAGGCGACCCGGTCAGCGAGGGGCGGGGCGGGGCGATAGC	52	2	y	2.8e-06	+ ++++++++
chr17:71551881-71552261	76	GCAGGCCCCGCCCTCGGCGGTTCCCGTGCTCTGATTGGCTCCCGCGGCCGCGCGCTCCCGGCCCTCCGCTTGAGG	82	2	n	9.5e-06	+++++++ +
chr17:71551881-71552261	76	GCAGGCCCCGCCCTCGGCGGTTCCCGTGCTCTGATTGGCTCCCGCGGCCGCGCGCTCCCGGCCCTCCGCTTGAGG	103	1	y	1.2e-07	+++++++++++++
chr17:71551881-71552261	226	CTGTGGGGCCGCTCGCTCTTCGCCGGCCTGCGCAGGTACCTTCACCTgcccgcccgcccgccggggccTGATGGC	274	2	n	3e-05	+++++++ +++
chr17:71551881-71552261	301	GGGGTTCTGGGTGTCGCCTGTGCCCTCCCTCTCGCTCCCACAGTCCTGCGTGAGGAGGCGGGGACGCCTCAGCCC	352	2	y	1.1e-06	++++ ++++++
chr11:55469192-55469821	1	TAGTCCATCCTCTTAACCGCTCCAGAGGGCACGGCGGCCCTGGGGCTGCCTTTGGAGAGGGCCATCCCTCCCTGT CAATCAGCTCCATTCGGTGTTGCGATTGGCTGGGGGCTTCCTTGCTCCCCGCCCGCGCCTACCTCCTAGTTGCAT	72	3	n	1.1e-06	++++++++++
chr11:55469192-55469821	1	TAGTCCATCCTCTTAACCGCTCCAGAGGGCACGGCGGCCCTGGGGCTGCCTTTGGAGAGGGCCATCCCTCCCTGT CAATCAGCTCCATTCGGTGTTGCGATTGGCTGGGGGCTTCCTTGCTCCCCGCCCGCGCCTACCTCCTAGTTGCAT	94	1	y	1.7e-06	+++ ++++++++++
chr11:55469192-55469821	1	TAGTCCATCCTCTTAACCGCTCCAGAGGGCACGGCGGCCCTGGGGCTGCCTTTGGAGAGGGCCATCCCTCCCTGT CAATCAGCTCCATTCGGTGTTGCGATTGGCTGGGGGCTTCCTTGCTCCCCGCCCGCGCCTACCTCCTAGTTGCAT	123	2	n	4.5e-05	+++++++ + +
chr11:55469192-55469821	226	CAGAAAAAGAAATGTAAGCCAATGAGAACGGGTGCATGCAACTATTGGCTTGTCTGAGTGTCGCTCTCAGTGCAT	241	1	n	1.3e-06	+++++++ +++++
chr11:55469192-55469821	301	CCCGCCCTCATTTTTATAGACCATCTGAGTATTGGCGAGGTTTCGTGTCCATCTGGGCTCTAGCTCCTTCAGTTA	301	2	n	1.7e-05	+++++++ +
chr11:55469192-55469821	376	TAGGCAGATGCGGCAGCCACTCAGGAGCTCGGCCTCTAGACAAAGACGCTGTCCAATCATAGCCAAGGGGCGCGG	425	1	n	1.8e-05	++ +++++++ +++
chr11:55469192-55469821	451	TGGCGAGGCGGCCATTGGTCCCTGCATGCGACCGGGAGCAGCAGGTTCGGCTGAGCGCGGCTATATAGCGGGCGG	458	1	y	6.9e-05	++ + +++++++
chr8:84237038-84237485	1	AGACTCTTCACAACAATGAAGCCGTCTTAGCAGCCGCTGCCTCCTCAGACGAGGCCCCGCCCCCACCGCCCTATT	56	2	n	7.3e-07	+++++++++ +
chr8:84237038-84237485	76	TCTCCCTTTCTATTGGCTGTCCTCAAAGACCCGCCTCCAAGATGCCGCTGTTCATTCGACAATCTCCACGTCCGT	81	1	y	1.8e-05	+++ + ++++++++
chr8:84237038-84237485	76	TCTCCCTTTCTATTGGCTGTCCTCAAAGACCCGCCTCCAAGATGCCGCTGTTCATTCGACAATCTCCACGTCCGT	105	2	n	1.3e-05	++++++ ++
chr8:84237038-84237485	151	CTTTTCTGTGCCATCCAATAAGAGGTCGCAAGAAGAGTCGCTGTCCATCACGGGGCGGTATGAGCCAATCAAAAT	162	1	n	1.2e-05	++ +++++ +++++
chr8:84237038-84237485	151	CTTTTCTGTGCCATCCAATAAGAGGTCGCAAGAAGAGTCGCTGTCCATCACGGGGCGGTATGAGCCAATCAAAAT	191	3	n	1.4e-05	+++++ ++++
chr8:84237038-84237485	151	CTTTTCTGTGCCATCCAATAAGAGGTCGCAAGAAGAGTCGCTGTCCATCACGGGGCGGTATGAGCCAATCAAAAT	212	1	n	6.7e-06	+++++++++ ++
chr1:191396979-191397845	76	GCGTGCGCGCTCCCGCGGCCCGGGGGAGGTCCTCGCGGGGGGTGGAGGAAGGAGTTTGACTGACAACTTCCGCGG	132	3	y	6.6e-05	+++ +++++
chr1:191396979-191397845	151	GGTCCCACTAGCCTCCGGAGTCTCCGGAGGGGGCCGGGGCGGGAAAGCATGCCAGTGCCCTCGGCCAATCGCAGG	183	2	y	1.1e-05	+ ++++++++
chr1:191396979-191397845	151	GGTCCCACTAGCCTCCGGAGTCTCCGGAGGGGGCCGGGGCGGGAAAGCATGCCAGTGCCCTCGGCCAATCGCAGG	212	1	n	5.4e-06	++++++++++ +++
chr1:191396979-191397845	226	GCTAAGCGGCAGACGGGGGTGGGGGCGTGGCCTCCCGGCTGTCTATCAAGAGTCCATAGCTGGGTGGGAGGGAGG	238	2	y	1.7e-05	+++++ +++
chr1:191396979-191397845	226	GCTAAGCGGCAGACGGGGGTGGGGGCGTGGCCTCCCGGCTGTCTATCAAGAGTCCATAGCTGGGTGGGAGGGAGG	264	3	n	2.3e-05	+++++ ++++
chr1:191396979-191397845	301	GGCTACGTGACAGACGCGGGCCACAACCAATCGCAAGTGAAGGCAGTGAGCGGGGTGCCTTGTGCGTCACAACTG	324	1	n	7.5e-06	++++++++++ +++
chr1:191396979-191397845	601	GCGTCAGTCGAACGGGGGCGGGGCCAAGGTCGTGTCAGAGCAACGTGATTGACAGGCGAAGGAGCCCCGGGAGAG	612	2	y	2.5e-06	+++++++++
chr1:191396979-191397845	601	GCGTCAGTCGAACGGGGGCGGGGCCAAGGTCGTGTCAGAGCAACGTGATTGACAGGCGAAGGAGCCCCGGGAGAG	646	3	y	1.1e-06	++++++++++
chr1:191396979-191397845	676	AAATGAGCTTGTCCAATCGGAGCGCGGGGCTACGTTCTTGGGCGGGCCTTCTCCTCTCCGGTCCTAAACCGCGTA	685	1	n	3.4e-06	++ +++++++++++
chr1:191396979-191397845	676	AAATGAGCTTGTCCAATCGGAGCGCGGGGCTACGTTCTTGGGCGGGCCTTCTCCTCTCCGGTCCTAAACCGCGTA	711	2	y	6.5e-05	+++++++
chr17:30612458-30612874	151	GCTCCACAAGGCCCGGGGGACGCCTTTGCAGTCGGCTGAGTGACAGGCCAAGGGGCGGGCGGACGCGGCTCCCAG	187	3	y	2e-06	+++ ++++++
chr17:30612458-30612874	151	GCTCCACAAGGCCCGGGGGACGCCTTTGCAGTCGGCTGAGTGACAGGCCAAGGGGCGGGCGGACGCGGCTCCCAG	199	2	y	2.1e-06	+ ++++++++
chr17:30612458-30612874	226	CCAACCACGGTGCACATGGCTGTTGGCTGTCTGCTGATTGGATTCCAGTGAGTCTGGTTCAGCATGGCGAGACTA	256	1	y	2.1e-05	++ ++++++++ +
chr9:22156665-22157080	1	TGCTCTCAGAGTCTTTCTGGCCTCACCCGTCAATCAAGACCACGGGGGCGGAGCCTGAGCCTGGGAGCGAAGGCA	27	3	n	3.8e-06	+ ++++++++
chr9:22156665-22157080	76	AGGTGAACTGTCCAATGAGCACGCGCGGACCGGCTCCATCGCGGGATCTGGGTTCCTCACCCCGCCCCTGCAGGG ATTTGATTGGGCGGCTGGCCGGGCTGTCCCGCCTTCGTGGGGCGGTGACTGTCACCGCCAGGCGCCGAAGGGACC	84	1	n	1.8e-05	++ +++++ ++ ++
chr9:22156665-22157080	76	AGGTGAACTGTCCAATGAGCACGCGCGGACCGGCTCCATCGCGGGATCTGGGTTCCTCACCCCGCCCCTGCAGGG ATTTGATTGGGCGGCTGGCCGGGCTGTCCCGCCTTCGTGGGGCGGTGACTGTCACCGCCAGGCGCCGAAGGGACC	136	2	n	2.8e-06	++++++++ +
chr9:22156665-22157080	76	AGGTGAACTGTCCAATGAGCACGCGCGGACCGGCTCCATCGCGGGATCTGGGTTCCTCACCCCGCCCCTGCAGGG ATTTGATTGGGCGGCTGGCCGGGCTGTCCCGCCTTCGTGGGGCGGTGACTGTCACCGCCAGGCGCCGAAGGGACC	150	1	y	6.9e-05	+ + +++++++ ++
chr9:22156665-22157080	76	AGGTGAACTGTCCAATGAGCACGCGCGGACCGGCTCCATCGCGGGATCTGGGTTCCTCACCCCGCCCCTGCAGGG ATTTGATTGGGCGGCTGGCCGGGCTGTCCCGCCTTCGTGGGGCGGTGACTGTCACCGCCAGGCGCCGAAGGGACC	178	2	n	3.7e-05	++++++ +
chr9:22156665-22157080	226	GGACTCCTACAGGCCTGCAAACGGTGAGTTGAGGGTCTCGAAATACGAGCGGAGGAGCTGTTGAAACCGGCTGGG GCGGGACTCGCGCCAGCTTGGCGTCTGCGCCATGGACGCCGCCGACTCCGTTTGTCTGGCTGGTTCGTTTTCGGT	295	2	y	1e-05	+ ++++++++
chr13:62466634-62467068	226	GCCCTGCCTATCCGGAGGCCCTGATTGGCTAGTGAGACTTGATTGACATGAGCACCTCCCTTAGGGTTACAGTGC	243	1	y	8.5e-08	++ +++++++++++
chr13:62466634-62467068	226	GCCCTGCCTATCCGGAGGCCCTGATTGGCTAGTGAGACTTGATTGACATGAGCACCTCCCTTAGGGTTACAGTGC	265	3	y	7.4e-06	+++++++++
chr10:80167594-80168051	1	CCGCCTCCTAGTCGCTAGCGGGCGGGGGGTGGGGGGGAAAAATGCGGCCAGGAAAGATTCCAGCCAATCAAAACA	23	2	y	6.1e-06	++++++ +++
chr10:80167594-80168051	1	CCGCCTCCTAGTCGCTAGCGGGCGGGGGGTGGGGGGGAAAAATGCGGCCAGGAAAGATTCCAGCCAATCAAAACA	61	1	n	4.1e-07	++++++++++ +++
chr10:80167594-80168051	76	CTCAGCGCCTCCGCGCGGACTAGGGCAAAGCCAACGGAGTCCCGCCCCTCCACCGAGGCGCAGATGCCGAATCTA	116	2	n	1.2e-06	++++++++ ++
chr10:80167594-80168051	151	AGGCGTCGGATTGGTCAGCGCGGCGTGGTGGGCGGGTTAAGGGGCGTGGCTCCAGGAGTGGAGTATATCAGGCGG	176	2	y	8.5e-06	++ +++++++
chr10:80167594-80168051	151	AGGCGTCGGATTGGTCAGCGCGGCGTGGTGGGCGGGTTAAGGGGCGTGGCTCCAGGAGTGGAGTATATCAGGCGG	188	2	y	9.5e-05	+ ++++++ +
chr10:80167594-80168051	376	TGACTCTCGGGCGAGGCGGAGCCGCAGCGGCACGCCCCTGGGACTTGGGGGCGGGCCCGGGTTGGAGTCCGCCCC	420	2	y	2.8e-06	+++++++++
chr5:123141127-123141433	1	TATAGAAGCCGCGCGCTGATTGGCTGCCGCACCCTGCCGCCCTGCTCCAGCCAATTACCTACCCACGGCCAAATT	13	1	y	1.9e-07	++ +++++++++++
chr5:123141127-123141433	226	CAAAATGGAAGCCGAGCGCTGATTGGCCGCCGCCACTCCCGGACCTTTAATAAAGAAAGGGGAAGGAAAATGATA AATGCA	241	1	y	6.8e-07	++ +++++++++++
chr5:123141127-123141433	226	CAAAATGGAAGCCGAGCGCTGATTGGCCGCCGCCACTCCCGGACCTTTAATAAAGAAAGGGGAAGGAAAATGATA AATGCA	295	4	y	7.8e-05	+++++ ++++
chr15:100551801-100552298	76	TCCCCGCCCCCCCACTCCGCTCTCAGCACAAACCCAGGGTTCCTCCGAGCCGTCCCCACACCCTCCTTAGCCACC	78	2	n	1.7e-07	+++++++++++
chr15:100551801-100552298	151	ACGACCGCCTGGAAGCGTGGACAGCGAAAGTTCGGCGCAGACTCGAAGCGCAAACCCGCCCCCAGCGCCAACCAA TCAGGACGTCCGCTACGGCCATGGCGCAACGTCACCATCCATCTACCAATGAAGAAGAGACTGGTTCTGTCTTCG	205	2	n	1.9e-06	+++++++++
chr15:100551801-100552298	151	ACGACCGCCTGGAAGCGTGGACAGCGAAAGTTCGGCGCAGACTCGAAGCGCAAACCCGCCCCCAGCGCCAACCAA TCAGGACGTCCGCTACGGCCATGGCGCAACGTCACCATCCATCTACCAATGAAGAAGAGACTGGTTCTGTCTTCG	219	1	n	1.3e-06	+++++++++++ ++
chr15:100551801-100552298	301	CAGCGGTGATAGGCTATCGACGCGAAGGCTTCCGCCCCCGGAGTAGTGGGCGGGCTCAGTGCTTAGGCGTGAACC	344	2	y	6.8e-06	++ +++++++
chr6:87850993-87851361	76	ACGGATCCAATCAGCGCAGGAAGCCAGGCCAGCCAATCAGAATCGCCCGCTGGGAGCGCGGCCTCGCGCGAGGGC	79	1	n	1e-05	+ ++++++++ ++
chr6:87850993-87851361	76	ACGGATCCAATCAGCGCAGGAAGCCAGGCCAGCCAATCAGAATCGCCCGCTGGGAGCGCGGCCTCGCGCGAGGGC	105	1	n	3.4e-07	+++++++++++++
chr6:87850993-87851361	151	GGCAGGGGCGGGGCGGACTGCTCCACGCCCAGCCTCTTCCGGCCCGCAGCGCTCGCGGCCTTCCCGCCCGTACCT	152	2	y	2.8e-06	+ ++++++++
chr6:87850993-87851361	151	GGCAGGGGCGGGGCGGACTGCTCCACGCCCAGCCTCTTCCGGCCCGCAGCGCTCGCGGCCTTCCCGCCCGTACCT	213	2	n	8.4e-05	+++++++ +
chr6:85451263-85452160	1	CCCTCAGGCCCGCTCTCCGCGCCGGTTGGAGCACAGAACGGAGGCCAGCGGCTGATTGGCCGCCACGCCTGTTCG	49	1	y	6.6e-05	+ +++++++++++
chr6:85451263-85452160	76	TGTGGCCGCACTTTCCTCCTCTGCGCCCTAGGCCACTTCCTATTGGCCAGGAGAAGTGGAACCGGGCGCTGATTG GCCAAAACTCTTAATAGCAACTGCAGTTCGCGGCCCCGCCCCCGCACTCCTCCTTATAGACGCGCCTCCCGGAAC	111	1	y	6.7e-06	+++++ ++++++++
chr6:85451263-85452160	76	TGTGGCCGCACTTTCCTCCTCTGCGCCCTAGGCCACTTCCTATTGGCCAGGAGAAGTGGAACCGGGCGCTGATTG GCCAAAACTCTTAATAGCAACTGCAGTTCGCGGCCCCGCCCCCGCACTCCTCCTTATAGACGCGCCTCCCGGAAC	141	1	y	2.8e-07	++ +++++++++++
chr6:85451263-85452160	76	TGTGGCCGCACTTTCCTCCTCTGCGCCCTAGGCCACTTCCTATTGGCCAGGAGAAGTGGAACCGGGCGCTGATTG GCCAAAACTCTTAATAGCAACTGCAGTTCGCGGCCCCGCCCCCGCACTCCTCCTTATAGACGCGCCTCCCGGAAC	185	2	n	4.1e-07	+++++++++ +
chr6:85451263-85452160	526	TGATAGCTCATTGCACGTCTACCATGGCGTCTGGGAGCGCGGGCTGAGGCGGGACCTTACCGCACCTTACAAACC	568	2	y	3e-05	+ + ++++++
chr6:85451263-85452160	751	TCGCCAGAAGCTTCTGGGCATTTCTCCGGCGCGGAGCATTGTGGGCTTGGGTGGGCGGCCCCGAGGCGGACAACT	795	2	y	8.8e-05	+ +++ +++
chr7:90475938-90476392	1	TCGACTCGGACCAACTTGGTCGCTGGGACGCCGCCATCTTAGCGCCTCACGTGACTGACAGGAGGGCGTGGCCGG	52	3	y	2.9e-06	+++ ++++++
chr7:90475938-90476392	76	AGCGCCTGGGGCGGGACTTGCAGCTGTCTGACAGCTCGTACCTTTAGTCCGGTACTCCCCCACCCAGTCAAAAGC	80	2	y	1.9e-05	++++++++
chr7:90475938-90476392	76	AGCGCCTGGGGCGGGACTTGCAGCTGTCTGACAGCTCGTACCTTTAGTCCGGTACTCCCCCACCCAGTCAAAAGC	134	2	n	6.5e-05	+++ +++ ++
chr7:90475938-90476392	151	CGCGCCCTCCAGCCGGGCGGAGGTTGGGCGTGGCGTCGCAGAAGTGCGATCTCTCATTGGCTCCGAGGAAGGCTC	200	1	y	3e-06	++++ +++++++
chr7:90475938-90476392	226	AGGGTCAGGGGCCCGCCCCTAGCCAGCCTTGCCTTGTCCTCTGCCAAATTGTCAGCCTGGCCAACCTGAAGGGAA	237	2	n	8.5e-06	++++++++
chr4:134714097-134714307	1	ggggctgccccgccccctggtggttgagttaagtcatgtgggtagctctggccaatgagctcctagcaaggacag	9	2	n	2.6e-07	++++++++++
chr4:134714097-134714307	1	ggggctgccccgccccctggtggttgagttaagtcatgtgggtagctctggccaatgagctcctagcaaggacag	49	1	n	1.2e-05	++++++++ ++ +
chr15:102296116-102296428	1	GAGACTGTGTCCCAGAGTCTTTCCGGTCCAGAGTTGTACCCGCCCCTCCAGGAACACGTGACAGACAGCGCGGCA	39	2	n	1.2e-06	++++++++ ++
chr15:102296116-102296428	1	GAGACTGTGTCCCAGAGTCTTTCCGGTCCAGAGTTGTACCCGCCCCTCCAGGAACACGTGACAGACAGCGCGGCA	59	3	y	6.6e-05	+++ +++++
chr15:102296116-102296428	76	GATAAACTACAACTCCCAGAGCGCCACGCGGCCGGCCTGCGTTACGCTTTCTCGCTGATTGGTCACTAGGGATAT	127	1	y	3.4e-06	+ +++++++++++
chr4:8647137-8647782	1	CTCGCCCGCACCATTTTGACCCGGCAAAGGCGGAACCTACGACGTGCAGCATTCTGGACGCCTCCGCCAATCACA GGGACCGGCCGGCTGCGGAAGCCGGGCCTCCTCAGGCTGCCCGGGCCGCCCGCTCGCTCGGAGCGCACGTCGCGG	64	1	n	1.4e-05	+ ++++++++ +++
chr4:8647137-8647782	226	GTCCGCGAGGCGGGCGGCGAAGGCAGGAGGGCTCTCGGGACGCAGCCTCGCCTGAGGCAGGTCAAGGACGCCCGA	229	2	y	3.2e-05	+ + ++++++
chr4:8647137-8647782	301	ACGAGGGTCGCGGACGCTTccccgcggggccgcgccgcgcgTGTCCGCACCGCTTCCTGCGCGCGCCCTGGGGCG GGGCTATGCGAAGCTAGCCAATCAGCGATGGGCATCCTGGATCCGCCCCCCCCGAGCCCTGGGGAGGGCGGGGCC	367	2	y	1.9e-05	++++++++
chr4:8647137-8647782	301	ACGAGGGTCGCGGACGCTTccccgcggggccgcgccgcgcgTGTCCGCACCGCTTCCTGCGCGCGCCCTGGGGCG GGGCTATGCGAAGCTAGCCAATCAGCGATGGGCATCCTGGATCCGCCCCCCCCGAGCCCTGGGGAGGGCGGGGCC	390	1	n	4.1e-07	+++++++++++ +
chr4:8647137-8647782	301	ACGAGGGTCGCGGACGCTTccccgcggggccgcgccgcgcgTGTCCGCACCGCTTCCTGCGCGCGCCCTGGGGCG GGGCTATGCGAAGCTAGCCAATCAGCGATGGGCATCCTGGATCCGCCCCCCCCGAGCCCTGGGGAGGGCGGGGCC	437	2	y	1.9e-06	+++ +++++++
chr4:8647137-8647782	451	GTGGGAAGGGCGGGGCGTGGGGGACCTGCTAGCGGAGGTGGGGAATGGGCTGGGAGGAGCCAGTGGTGCGGGCCC	454	2	y	8.5e-06	++ +++++++
chr4:8647137-8647782	451	GTGGGAAGGGCGGGGCGTGGGGGACCTGCTAGCGGAGGTGGGGAATGGGCTGGGAGGAGCCAGTGGTGCGGGCCC	482	2	y	2e-05	+ ++ ++ +++
chrX:8074565-8074940	76	CAGTCGATTGGCCGCTCCTCGCCGCTCGCAGCTCCGGCTCGGACCAACCGCGGAGCTGTGCCTGGACTCCTCCCG	76	1	y	5.5e-05	+ ++++++++++
chrX:8074565-8074940	226	TTTGCTCCAGGACCCGCCCCTTGTCAGTCATATTGCTAGCCAATCGCGGCGTCAGCCAGTCATAAAGGGCTTGTT	238	2	n	2.1e-06	++++++++ +
chrX:8074565-8074940	226	TTTGCTCCAGGACCCGCCCCTTGTCAGTCATATTGCTAGCCAATCGCGGCGTCAGCCAGTCATAAAGGGCTTGTT	262	1	n	3e-06	++++++++++ ++
chrX:8074565-8074940	301	TTGTGCAACCCCAATTCTGCCAGTCATTTATTTTAACCTCGCGCAGGCATTCACTGCCAGGGTGGACCTAGAGCC	317	3	n	2.4e-05	+++ ++ +++
chr4:132510420-132510775	76	CGCTGCGGTCCCTGGGGGAGGGCGGGGACACAAAAGTCCCACGGCGCAGCCAATCAGATGCCTGTTTCTCGGGGA	91	2	y	1.9e-06	+++ +++++++
chr4:132510420-132510775	76	CGCTGCGGTCCCTGGGGGAGGGCGGGGACACAAAAGTCCCACGGCGCAGCCAATCAGATGCCTGTTTCTCGGGGA	122	1	n	1.5e-06	++++++++++++ +
chr4:132510420-132510775	151	GGCGGAGCCGACACCTCCCTCCGGAGCCAACCTTCCGTCCAATCAGCATCGACAAGCGCCTGGGAACTCTGGGAG	186	1	n	2.9e-05	++ ++++++++ +
chr4:132510420-132510775	226	CTGTAGTTGGCCTCGCACAGATGCTGCAAACTTTTGCATGAAGGCGTTAGTCAGGTCTCTGGCAATACCAGATGA GAGTGACAGCCCAAGGAGTCATTAGGGCTGCGTGATGAAACGGGACTTCACGGGG	300	3	y	6e-05	++ ++++++
chr8:75033549-75034293	1	TCAGGGGCGTGGCTTAGAAGCCGGCCCTCCCAGGCCCCGCCCTGGTGTGGCGTCAGCCACGGCCCAGGGGCAGCC	36	2	n	6.5e-05	+++++++
chr8:75033549-75034293	76	TAGTAGGGGGCGGGGCCTCGTGGCTGCGCTCCAGAGCCCCCGCCTGCCGGCACCACCCCGCGGGCTGGCCAACGG	79	2	y	5.2e-07	++++++++++
chr8:75033549-75034293	76	TAGTAGGGGGCGGGGCCTCGTGGCTGCGCTCCAGAGCCCCCGCCTGCCGGCACCACCCCGCGGGCTGGCCAACGG	114	2	n	8.1e-05	++++++ ++
chr8:75033549-75034293	301	AGTCCCGCCCCTGTGTGCCGCTCTGGCCTTGGCCCTGGGACCTGTCGGAGTCCGCAGTCTGGCAGACAGGAGGGA	304	2	n	1e-05	++++++++
chr8:75033549-75034293	376	GGCTAGGCGGTGAGGCTGGCGCGGCGCTCTGGGCTCCGCCCACCCTATGACCCACCTGATTGACAAGAACACGGG CCAATCGGAAGTCTTATATGGGGATTGATGCTTGATGTAGCCAATAGGCAGTGGAAGGAGGCGGTCCTGGGCGGA	414	2	n	7.4e-05	+++ +++ +
chr8:75033549-75034293	376	GGCTAGGCGGTGAGGCTGGCGCGGCGCTCTGGGCTCCGCCCACCCTATGACCCACCTGATTGACAAGAACACGGG CCAATCGGAAGTCTTATATGGGGATTGATGCTTGATGTAGCCAATAGGCAGTGGAAGGAGGCGGTCCTGGGCGGA	432	3	y	2.3e-05	+++++++++
chr8:75033549-75034293	376	GGCTAGGCGGTGAGGCTGGCGCGGCGCTCTGGGCTCCGCCCACCCTATGACCCACCTGATTGACAAGAACACGGG CCAATCGGAAGTCTTATATGGGGATTGATGCTTGATGTAGCCAATAGGCAGTGGAAGGAGGCGGTCCTGGGCGGA	448	1	n	4.8e-06	+++++++++++++
chr8:75033549-75034293	376	GGCTAGGCGGTGAGGCTGGCGCGGCGCTCTGGGCTCCGCCCACCCTATGACCCACCTGATTGACAAGAACACGGG CCAATCGGAAGTCTTATATGGGGATTGATGCTTGATGTAGCCAATAGGCAGTGGAAGGAGGCGGTCCTGGGCGGA	488	1	n	1e-05	++++++++ ++ ++
chr17:28232526-28232883	76	TGGCTGTCAAAGGAGTGGCTCCAGGCGGCGCGGCGATTGGCTACTGCTATGGCGGAAGGGGGCGGGGGCGAGTGC	105	1	y	2.6e-06	++ ++++++++++
chr17:28232526-28232883	76	TGGCTGTCAAAGGAGTGGCTCCAGGCGGCGCGGCGATTGGCTACTGCTATGGCGGAAGGGGGCGGGGGCGAGTGC	131	2	y	7.3e-07	++++++++++
chr17:28232526-28232883	226	ACGCCGCAGGCCGCGGCGGACCTGGGGATTAATGGGAAAAGTTTTGGCAGGAGCTGGGGGATTCTGCGGAGCCTG	250	4	y	9.8e-05	+ ++++++++
chr11:3648983-3649423	1	CGCTCTGCTCTGCAGCTACCGTCCCGGCTGCGTCTCTCGGCCCGCCCCCGGTACTGTTCCTTTAAATGGCCGAGA	41	2	n	1.5e-06	+++++++++
chr11:3648983-3649423	151	GTGGACCGACGTCGCTCGCCAATCAGAAGGTGGAGTCTCAGGGCGGGGGCGGGAAGACTTCGAGCTCTGTGATTG GCCGAAGGTGCGCTGGAGGCCTCGGCGGCCGGGCCGTCGGGAGTGAGCGAGGTGATTCGCGCTGCGTGCGCTTAC	166	1	n	2.6e-06	+ ++++++++++++
chr11:3648983-3649423	151	GTGGACCGACGTCGCTCGCCAATCAGAAGGTGGAGTCTCAGGGCGGGGGCGGGAAGACTTCGAGCTCTGTGATTG GCCGAAGGTGCGCTGGAGGCCTCGGCGGCCGGGCCGTCGGGAGTGAGCGAGGTGATTCGCGCTGCGTGCGCTTAC	193	2	y	4.1e-07	+ +++++++++
chr11:3648983-3649423	151	GTGGACCGACGTCGCTCGCCAATCAGAAGGTGGAGTCTCAGGGCGGGGGCGGGAAGACTTCGAGCTCTGTGATTG GCCGAAGGTGCGCTGGAGGCCTCGGCGGCCGGGCCGTCGGGAGTGAGCGAGGTGATTCGCGCTGCGTGCGCTTAC	216	1	y	3.4e-06	++ ++++++++++
chr8:69270969-69271200	1	AACACTGTGCTGTGTCCCTTCTGCATCCTCTAAGCATAAGGGGGAGGTTCTTGTCACTCAAGTCTCATTAGCCAA TCAGACCCTTGAGGCGGACCTCCAGTCAGAAGGGGAGGCGGGCTCTTCCGGGGGACTTTCTGCAGGCTGGAATCT	51	3	n	6e-05	+++++ +++
chr8:69270969-69271200	1	AACACTGTGCTGTGTCCCTTCTGCATCCTCTAAGCATAAGGGGGAGGTTCTTGTCACTCAAGTCTCATTAGCCAA TCAGACCCTTGAGGCGGACCTCCAGTCAGAAGGGGAGGCGGGCTCTTCCGGGGGACTTTCTGCAGGCTGGAATCT	69	1	n	7.5e-06	++++++++++++ +
chr8:69270969-69271200	1	AACACTGTGCTGTGTCCCTTCTGCATCCTCTAAGCATAAGGGGGAGGTTCTTGTCACTCAAGTCTCATTAGCCAA TCAGACCCTTGAGGCGGACCTCCAGTCAGAAGGGGAGGCGGGCTCTTCCGGGGGACTTTCTGCAGGCTGGAATCT	107	2	y	1.5e-06	++++ ++++++
chr11:23255475-23256103	1	AAACCCGCGCTGCCTTCTGCTCACGGGCGAACCCCACCCTCTCCGTCACCAAAGGCGCCCAGCCAATGGGCGAGC	33	2	n	1.1e-05	+++ +++ +++
chr11:23255475-23256103	1	AAACCCGCGCTGCCTTCTGCTCACGGGCGAACCCCACCCTCTCCGTCACCAAAGGCGCCCAGCCAATGGGCGAGC	60	1	n	9.2e-06	++++++++ ++ +
chr11:23255475-23256103	76	CGGAAAGGCCGGGCTTACAAGCGAGGGACCGAGAGGGGGAGCCACTCGAGGGGAAAGGGATGTAGAAGGCGGGCT	138	2	y	1.9e-05	++ ++++++
chr11:23255475-23256103	151	GCACTTGACTGACAGCTCACTCAAGCCAATCCTCTGTGAGGCTTCTCCGCTCTCCTCTTTGCTGGGCTCTGTTCG	156	3	y	2.9e-06	+++ ++++++
chr11:23255475-23256103	226	ACGtcccaccttctcttcctccacccccccctcactcctttgcgtcccgccccgcctcccctcccccACTCTGCG	230	2	n	3.2e-05	+++ ++ +++
chr11:23255475-23256103	226	ACGtcccaccttctcttcctccacccccccctcactcctttgcgtcccgccccgcctcccctcccccACTCTGCG	276	2	n	1.5e-06	++++++ ++++
chr11:23255475-23256103	301	GGCAAATCACTGCTGGAAAGAGGCGGGGGCCTAAGCGGCAGGCTCGTGTGGAGCCTTGAGGTGGGATTGACGGGC	317	2	y	1.5e-05	+ + ++++++
chr11:23255475-23256103	376	GCTCCGACCAATAAGAGGTAGGCTGATGGCGCGGCTGTGGCCGGGGCCGACCAATGGGCGCGCGGCCTGGGGGCG	380	1	n	7.5e-06	++++++++ +++++
chr11:23255475-23256103	376	GCTCCGACCAATAAGAGGTAGGCTGATGGCGCGGCTGTGGCCGGGGCCGACCAATGGGCGCGCGGCCTGGGGGCG	423	1	n	1.5e-05	++++++++ ++ ++
chrX:38456446-38456690	1	ATAAGACCAGGGGCGGGGTTCTTTATTCCTTTCAGCCAATCAGCATGCTTAGAAACTGAGAGGGAGGCGGTGATG	7	2	y	6.8e-06	++++++++
chrX:38456446-38456690	1	ATAAGACCAGGGGCGGGGTTCTTTATTCCTTTCAGCCAATCAGCATGCTTAGAAACTGAGAGGGAGGCGGTGATG	33	1	n	2e-06	+++++++++++ +
chr1:57995873-57996141	1	AGCCCGCCCGGCTCACCCAGCCACGCCCACTCGACCCTCTCCAGTACGTCCCGCCCCTTCCGTCTTCCACTTCCG	22	2	n	8.1e-05	+ +++++ +++
chr1:57995873-57996141	1	AGCCCGCCCGGCTCACCCAGCCACGCCCACTCGACCCTCTCCAGTACGTCCCGCCCCTTCCGTCTTCCACTTCCG	50	2	n	9.3e-07	++++++++ ++
chr1:57995873-57996141	76	GGTGGCAGCGCATCTTTGCGCCGCCTTCTCGGAATCTGATTGGCTGGAGCATAAACGCTAACTGCCGCGCAGTTT	108	1	y	3.4e-06	++++++++++++
chr1:36511699-36512038	1	tcccttgcctgcggagccccacgcccctccggctcgccccgccccgcgccgcTTGTTTACTCCCCGGCGCAGCCT	20	2	n	7.1e-05	+ ++++++ ++
chr1:36511699-36512038	1	tcccttgcctgcggagccccacgcccctccggctcgccccgccccgcgccgcTTGTTTACTCCCCGGCGCAGCCT	38	2	n	1.1e-05	++++++++ +
chr1:36511699-36512038	76	AGTTCTCCCCAGAGCCCGCCCCCGCCAGCCGCTTATTGGTCAAAGTGACGCGGAGGCCCGCGCCGATTGGCTGCA	90	2	n	4.1e-07	+++++++++ +
chr1:36511699-36512038	76	AGTTCTCCCCAGAGCCCGCCCCCGCCAGCCGCTTATTGGTCAAAGTGACGCGGAGGCCCGCGCCGATTGGCTGCA	104	1	y	1.4e-05	++ ++ ++++++++
chr1:36511699-36512038	76	AGTTCTCCCCAGAGCCCGCCCCCGCCAGCCGCTTATTGGTCAAAGTGACGCGGAGGCCCGCGCCGATTGGCTGCA	135	1	y	8.2e-07	++ +++++++++++
chr6:30693546-30693996	1	GGAAGTGGCCGGCTGTTCGTCCCTGCCCACGTGGCGCCTTTTCCGGTGCGCCCGCCCCCTCCGGCTCTCGGGTCC	51	2	n	9.2e-08	+++++++++++
chr6:30693546-30693996	226	TCTCTTCCGATTGGCTCGGCTGCCCAGGCCAGCCAATAGAAGCTCCGTTTACTGCTTCGGCCCGGGCGGGGAGAG	229	1	y	2e-06	+++++++++++++
chr6:30693546-30693996	226	TCTCTTCCGATTGGCTCGGCTGCCCAGGCCAGCCAATAGAAGCTCCGTTTACTGCTTCGGCCCGGGCGGGGAGAG	255	1	n	8.3e-06	++++++++ + +++
chr3:36150929-36151254	1	AGTGCTGGGGCCTGATGGGGCGGGACCGGAAAGTCATCCAATCAGCAGCACGATGGTGAGAACTTCGAATCAGAC	14	2	y	3.8e-06	++ ++++++++
chr3:36150929-36151254	1	AGTGCTGGGGCCTGATGGGGCGGGACCGGAAAGTCATCCAATCAGCAGCACGATGGTGAGAACTTCGAATCAGAC	35	1	n	9.2e-06	++ ++++++++ ++
chr3:36150929-36151254	76	GTTTAGACAGGGTAGAGGGGGCGGGCCTTCATGCTGTGTTTCTGAAGTCCAGGATCTTGGAATCCTCCTCAGGCT	90	2	y	9.2e-08	+++++++++++
chr14:67715682-67716296	1	AGACCAATCGAGACAGAACCGCCGGATGGCTAGTTTACCCTATTAGCCAATCCCGATACCAACCGTTACCTCGGT GGGTGGGTACAGTAGAAGGGGCAAAAGCCTAGCGAGGAGCTGATTGGTCTATGGGACTTCGGCGTCCCGCCTCTT CCTTAGACCCAGTCTCTTTATGCAAATGAGCACTCCTACACTCCAACGTGCGCCTGCTCAGTAACGCTTAGAGCG	1	1	n	4.6e-05	+++++++++ ++
chr14:67715682-67716296	1	AGACCAATCGAGACAGAACCGCCGGATGGCTAGTTTACCCTATTAGCCAATCCCGATACCAACCGTTACCTCGGT GGGTGGGTACAGTAGAAGGGGCAAAAGCCTAGCGAGGAGCTGATTGGTCTATGGGACTTCGGCGTCCCGCCTCTT CCTTAGACCCAGTCTCTTTATGCAAATGAGCACTCCTACACTCCAACGTGCGCCTGCTCAGTAACGCTTAGAGCG	44	1	n	9.9e-05	+++++++++ +
chr14:67715682-67716296	1	AGACCAATCGAGACAGAACCGCCGGATGGCTAGTTTACCCTATTAGCCAATCCCGATACCAACCGTTACCTCGGT GGGTGGGTACAGTAGAAGGGGCAAAAGCCTAGCGAGGAGCTGATTGGTCTATGGGACTTCGGCGTCCCGCCTCTT CCTTAGACCCAGTCTCTTTATGCAAATGAGCACTCCTACACTCCAACGTGCGCCTGCTCAGTAACGCTTAGAGCG	72	2	y	2.8e-05	++ +++ +++
chr14:67715682-67716296	1	AGACCAATCGAGACAGAACCGCCGGATGGCTAGTTTACCCTATTAGCCAATCCCGATACCAACCGTTACCTCGGT GGGTGGGTACAGTAGAAGGGGCAAAAGCCTAGCGAGGAGCTGATTGGTCTATGGGACTTCGGCGTCCCGCCTCTT CCTTAGACCCAGTCTCTTTATGCAAATGAGCACTCCTACACTCCAACGTGCGCCTGCTCAGTAACGCTTAGAGCG	112	1	y	3.1e-05	+ ++++++++++
chr14:67715682-67716296	1	AGACCAATCGAGACAGAACCGCCGGATGGCTAGTTTACCCTATTAGCCAATCCCGATACCAACCGTTACCTCGGT GGGTGGGTACAGTAGAAGGGGCAAAAGCCTAGCGAGGAGCTGATTGGTCTATGGGACTTCGGCGTCCCGCCTCTT CCTTAGACCCAGTCTCTTTATGCAAATGAGCACTCCTACACTCCAACGTGCGCCTGCTCAGTAACGCTTAGAGCG	141	2	n	5.3e-06	++++++ + ++
chr14:67715682-67716296	301	TCCACCGCCGTCTAGTGTTACTCTGAGCCCACCCCCCAGCCGGACTCTGATTGGCTAAATACTGGCCGGTACAGC	328	2	n	8.5e-06	+++ ++++++
chr14:67715682-67716296	301	TCCACCGCCGTCTAGTGTTACTCTGAGCCCACCCCCCAGCCGGACTCTGATTGGCTAAATACTGGCCGGTACAGC	344	1	y	6.1e-08	+++++++++++++
chr14:67715682-67716296	376	GTGTTGATTGGCGCAGCTCAGCGTCGGTCTGGGCGCGGTTGGGGGGAAGGGCCGCTAGCAGGCTGAGGAGCCTAG GGGCGGGGTGGGAAGGAGGATCGGCCAACCCCGGGGTGTGGGACTGAGGGTGCGTGCGTGAGGAGTGTGGGGCCG	376	1	y	4.9e-05	++ ++++++++
chr14:67715682-67716296	376	GTGTTGATTGGCGCAGCTCAGCGTCGGTCTGGGCGCGGTTGGGGGGAAGGGCCGCTAGCAGGCTGAGGAGCCTAG GGGCGGGGTGGGAAGGAGGATCGGCCAACCCCGGGGTGTGGGACTGAGGGTGCGTGCGTGAGGAGTGTGGGGCCG	447	2	y	8.5e-06	++++++++
chr14:67715682-67716296	526	ACCAGGAAGGTGGCGAAGGGCGGAGAGTCCGGGTGGGAGGCGGGAGGGGTCTCGCGGGCGCGGAGCGCGGCGGGT	559	2	y	5.3e-06	+++ ++++++
chr2:122467725-122468083	1	AAAAGACAGGAACAGGAGAGGGGAATTGGAGCCGAGAGGGGTAAATAGCGCCAGGGCCCGGCTCTATGCCCCACC TCCACTCTCCGATTGGCCGACGCCTCTAGCCCTGGGGCCCAGCAGCAGGGGGCGGGGCCAGACGCGGGCTGAGAC	70	2	n	2.4e-05	+++ ++ ++ +
chr2:122467725-122468083	1	AAAAGACAGGAACAGGAGAGGGGAATTGGAGCCGAGAGGGGTAAATAGCGCCAGGGCCCGGCTCTATGCCCCACC TCCACTCTCCGATTGGCCGACGCCTCTAGCCCTGGGGCCCAGCAGCAGGGGGCGGGGCCAGACGCGGGCTGAGAC	81	1	y	1.7e-06	+++++++++++++
chr2:122467725-122468083	1	AAAAGACAGGAACAGGAGAGGGGAATTGGAGCCGAGAGGGGTAAATAGCGCCAGGGCCCGGCTCTATGCCCCACC TCCACTCTCCGATTGGCCGACGCCTCTAGCCCTGGGGCCCAGCAGCAGGGGGCGGGGCCAGACGCGGGCTGAGAC	121	2	y	2.6e-07	++++++++++
chr7:102209890-102210677	76	GGTACAGAGAGGAAGATCTACCCGCCCAGCCCCGGCAGCGCTCCCGACTTACAGCGGTGCGTCTGGAGTGAGAGC	96	2	n	2.8e-05	+++++++ ++
chr7:102209890-102210677	601	ACCGCAGTGACGCTGTGTCCAGGCCCCGCCCCCTTCCTTGGAGCGCGGAGACTCGCTACGGAAGCTCCGGCCAAT CAGAAGGAAGTCCCAAGGATGACCTGGTAATTGTTCTATCCTTCTCTAGCTCCTGTCTGCGGGCAATGATGGGAA	625	2	n	7.3e-07	++++++++++
chr7:102209890-102210677	601	ACCGCAGTGACGCTGTGTCCAGGCCCCGCCCCCTTCCTTGGAGCGCGGAGACTCGCTACGGAAGCTCCGGCCAAT CAGAAGGAAGTCCCAAGGATGACCTGGTAATTGTTCTATCCTTCTCTAGCTCCTGTCTGCGGGCAATGATGGGAA	668	1	n	4.1e-07	++++++++++++++
chr3:89101932-89102300	76	CCGGCATGCCACGGACTAGGCGGCAAGAAACTCAGACTTGTGTCTCAGGGTGGGTGTGGCCTAGTTCGCTGATTG GCTAAATTACCTCGTGTGAGCATGGGCCTTGTGACGGCTGGCCAATGAAAGGGTGGCGCGCGGACCATCAGCCCA	141	1	y	4.1e-07	+ +++++++++++
chr3:89101932-89102300	76	CCGGCATGCCACGGACTAGGCGGCAAGAAACTCAGACTTGTGTCTCAGGGTGGGTGTGGCCTAGTTCGCTGATTG GCTAAATTACCTCGTGTGAGCATGGGCCTTGTGACGGCTGGCCAATGAAAGGGTGGCGCGCGGACCATCAGCCCA	189	1	n	3.4e-06	++++++++ + +++
chr3:89101932-89102300	301	TTCCAGTGCTTCTGGTTGACAGTGTTTCTAAGATCCCGGAATAACCAGCCTTGCAGCTTCCTATTTCC	313	3	y	3.3e-05	++ +++++++
chr9:61370516-61370854	1	TTGTCAGCGCTCCCCCACCCCTCGTGGTTTTGACTGACAGCTCTGGCTAAGGACTGACAGCTCTCGGAATCTCCA	14	2	n	1.9e-05	+++ ++++ +
chr9:61370516-61370854	1	TTGTCAGCGCTCCCCCACCCCTCGTGGTTTTGACTGACAGCTCTGGCTAAGGACTGACAGCTCTCGGAATCTCCA	31	3	y	2.9e-06	+++ ++++++
chr9:61370516-61370854	76	CCAATTACTAGTCGAGAGTCTCTTTGCTGGTCTGTGATTGGGTTTTAGACTTGCTCGGGGGCGTGGCCGGCGCGC	106	1	y	4.9e-05	++ +++++++ +
chr9:61370516-61370854	76	CCAATTACTAGTCGAGAGTCTCTTTGCTGGTCTGTGATTGGGTTTTAGACTTGCTCGGGGGCGTGGCCGGCGCGC	130	2	y	8.4e-05	+++++++ +
chr9:61370516-61370854	151	CCCACGTGGGGGCTGGAGCGAGAAAGGGGCGGGCCGGGTAGGAAGCGGGTGCGCCCACCCGTGACGTAAGGGGGA	173	2	y	3.8e-06	+ ++++++++
chr9:21291148-21291667	1	CCGAGAGAGGCAGCGGGGAACCCCGCCCAGCCCTTCGGCGCCCGCCCCTTGGGCCGGGTCTCCCCAGACTCACCC	22	2	n	2.8e-05	+++++++ ++
chr9:21291148-21291667	1	CCGAGAGAGGCAGCGGGGAACCCCGCCCAGCCCTTCGGCGCCCGCCCCTTGGGCCGGGTCTCCCCAGACTCACCC	41	2	n	2.1e-06	++++++++ +
chr9:21291148-21291667	76	TCCCTCCTTTCCTTGCGCGGGCGGGGTCTGCTCTGAGCCGGCACTGTACTGGCCGCCAGAGTCAGCCGCTAGTGG	90	2	y	4.5e-05	+ + +++++++
chr9:21291148-21291667	151	GCGAGGCAAGCCCGCCCCAGGCCCCGCCCAGAGCGCCCTTGTTTTCTTACAAACTCGCAACAGAGTAGCGAGAGC	161	2	n	1.9e-05	++++++++
chr9:21291148-21291667	151	GCGAGGCAAGCCCGCCCCAGGCCCCGCCCAGAGCGCCCTTGTTTTCTTACAAACTCGCAACAGAGTAGCGAGAGC	173	2	n	6.5e-05	+++++++
chr9:21291148-21291667	226	CACTTTGCCCAGAGCCCGACCTCCATTAGTCCCGCCTGCTGGGAATAACAGCCAATCAGCACGCGTTGCTGGGGA	256	2	n	7.4e-05	++++++ ++
chr9:21291148-21291667	226	CACTTTGCCCAGAGCCCGACCTCCATTAGTCCCGCCTGCTGGGAATAACAGCCAATCAGCACGCGTTGCTGGGGA	274	1	n	3.4e-07	+++++++++++ ++
chr9:21291148-21291667	301	GGTTTGTCTCTCCCGTAGCAGTGGCGTGGCTCCTGATTGGTCAGCGTGCAGCGACCAGTGGAGCTGCCCGCCACA	330	1	y	3.4e-06	++ +++++++++++
chr9:21291148-21291667	376	GCAGGAATTTTGGTTTTTCAAAACCGGCGGGCGGGCGGGAAAGAGGAGGAGGTTTAACTGACCCCAGCGGAGAGG	404	2	y	3e-05	+++ +++++++
chr8:117157798-117158112	76	AGCCCTTCTGATTGGCTGCTGCGAGGTAGGGCGGGGCGCGGGGGCGTCGCGGAAAGATGACGCAACGGCACAGCT	80	1	y	1e-07	++++++++++++++
chr8:117157798-117158112	76	AGCCCTTCTGATTGGCTGCTGCGAGGTAGGGCGGGGCGCGGGGGCGTCGCGGAAAGATGACGCAACGGCACAGCT	100	2	y	2.2e-05	++ +++++++
chr8:117157798-117158112	226	TCACTCAGTCcgggcgggcgggcgagcggacgcgaggagtggccggcggggacgtgcgcgggactcgggcgggcg ggtcgggcaggtgg	237	2	y	3e-05	+++ +++++++
chr8:117157798-117158112	226	TCACTCAGTCcgggcgggcgggcgagcggacgcgaggagtggccggcggggacgtgcgcgggactcgggcgggcg ggtcgggcaggtgg	292	2	y	3e-05	+++ +++++++
chr8:83972634-83973077	1	AGCCGCCGCAGCCTCCGCCCCGCCCGCTGCCCGGGCCGCAGCCTGAGCCGCTGCCCCGCCCTCTCACCCCGGGAC	19	2	n	3.9e-05	+++++++ ++
chr8:83972634-83973077	1	AGCCGCCGCAGCCTCCGCCCCGCCCGCTGCCCGGGCCGCAGCCTGAGCCGCTGCCCCGCCCTCTCACCCCGGGAC	55	2	n	1.5e-06	+++++++ +++
chr8:83972634-83973077	76	TGACACTAGCCGGGGCCGCCTGTCTCCGCCAATCGACGGCTTCGCAGGGGCAGCCCCAAGCCCTCTCGGGCTTCT	101	1	n	5.2e-05	+ ++++++++ ++
chr8:83972634-83973077	151	CGGCCAATCACGTGCGTTCGCCCGCCCGACTGCGGCCTCACGAGCCCGTGAGTGGCGGAGAGTCTGCAACTCGCG	151	1	n	3.8e-05	++++++++++ +
chr8:83972634-83973077	151	CGGCCAATCACGTGCGTTCGCCCGCCCGACTGCGGCCTCACGAGCCCGTGAGTGGCGGAGAGTCTGCAACTCGCG	199	3	y	9.6e-05	+++ ++ + +
chr8:83972634-83973077	226	TCACTCATCCAGGAGCCTATGGTGGCGCGGGAGGGTTCCGGAGGGCCAATGGACAGCGGCGTAGGGCTGTCAGTC AGGGAGGCCTGAACCAATGGGCGGTGGGCTGCGGGGGCGTCACGGACAGAGGACTTGGGCTGAGGCTCCCCCGCG GGCGGGCGCAGAGAGACGCGGGAAGCAGGGGCTGGGCGGGGGTCGTGGcgccgcagccagcgcagcca	268	1	n	6.9e-05	+++++++ + ++
chr8:83972634-83973077	226	TCACTCATCCAGGAGCCTATGGTGGCGCGGGAGGGTTCCGGAGGGCCAATGGACAGCGGCGTAGGGCTGTCAGTC AGGGAGGCCTGAACCAATGGGCGGTGGGCTGCGGGGGCGTCACGGACAGAGGACTTGGGCTGAGGCTCCCCCGCG GGCGGGCGCAGAGAGACGCGGGAAGCAGGGGCTGGGCGGGGGTCGTGGcgccgcagccagcgcagcca	292	3	n	2.9e-06	++++++ +++
chr8:83972634-83973077	226	TCACTCATCCAGGAGCCTATGGTGGCGCGGGAGGGTTCCGGAGGGCCAATGGACAGCGGCGTAGGGCTGTCAGTC AGGGAGGCCTGAACCAATGGGCGGTGGGCTGCGGGGGCGTCACGGACAGAGGACTTGGGCTGAGGCTCCCCCGCG GGCGGGCGCAGAGAGACGCGGGAAGCAGGGGCTGGGCGGGGGTCGTGGcgccgcagccagcgcagcca	311	1	n	2.6e-05	+++++++ ++ ++
chr8:83972634-83973077	226	TCACTCATCCAGGAGCCTATGGTGGCGCGGGAGGGTTCCGGAGGGCCAATGGACAGCGGCGTAGGGCTGTCAGTC AGGGAGGCCTGAACCAATGGGCGGTGGGCTGCGGGGGCGTCACGGACAGAGGACTTGGGCTGAGGCTCCCCCGCG GGCGGGCGCAGAGAGACGCGGGAAGCAGGGGCTGGGCGGGGGTCGTGGcgccgcagccagcgcagcca	371	2	y	6.2e-05	+ +++++++
chr8:83972634-83973077	226	TCACTCATCCAGGAGCCTATGGTGGCGCGGGAGGGTTCCGGAGGGCCAATGGACAGCGGCGTAGGGCTGTCAGTC AGGGAGGCCTGAACCAATGGGCGGTGGGCTGCGGGGGCGTCACGGACAGAGGACTTGGGCTGAGGCTCCCCCGCG GGCGGGCGCAGAGAGACGCGGGAAGCAGGGGCTGGGCGGGGGTCGTGGcgccgcagccagcgcagcca	405	2	y	2.8e-05	++ +++++++
chr16:97996997-97997463	226	ACTCTAAGGGAGGTGCTCGACTCACTCAAGACTTACTGGCCAATCAGAGCCTCCAGGCAGACCTGCGTGTCAGAA	262	1	n	2.1e-08	++++++++++++++
chr16:97996997-97997463	301	GAGAAGGCGGGTTTTCCGGGTGCGGTGGTGTCGGTTTCGCTTCCTGGTTGAGTGCTTGAATGGTTCTGTGTGCCG	301	2	y	7.7e-06	+++ ++++++
chr11:119053414-119053605	76	TGAGCTGGTGCACGCTCATTGGCCGACGCGTCTCTCGGCAACCGGGCTCTCACGAGTGGAAAGGAGCCAGCCGCC	87	1	y	1e-05	+ ++ ++++++++
chr11:119053414-119053605	151	CCCGCCCGCTCCCCGCCCCCTCCCATTCTTTCTCCCTTGGC	151	2	n	2.6e-05	+++++++ +++
chr11:119053414-119053605	151	CCCGCCCGCTCCCCGCCCCCTCCCATTCTTTCTCCCTTGGC	162	2	n	9.2e-08	+++++++++++
chr3:54692588-54692998	76	CCCCGCCCACAGCCCCGCCCAGTCCGCCAATCAGAAGAGCGGCCGCCGGAACTCGCTGTTGGAGCTGTAAGTGAG	77	2	n	1.4e-05	+++++++ +
chr3:54692588-54692998	76	CCCCGCCCACAGCCCCGCCCAGTCCGCCAATCAGAAGAGCGGCCGCCGGAACTCGCTGTTGGAGCTGTAAGTGAG	99	1	n	4.8e-06	+ ++++++++++++
chr3:54692588-54692998	151	CGTTGTGTCGGGCCTTGTACGACCTCAAGGCCCGCCCCTTCCACTAGCAACGCACCAATCGGAAGCGCGGCCGCA	181	2	n	9.3e-07	++++++++ ++
chr3:54692588-54692998	151	CGTTGTGTCGGGCCTTGTACGACCTCAAGGCCCGCCCCTTCCACTAGCAACGCACCAATCGGAAGCGCGGCCGCA	202	1	n	4e-05	++++++++++++
chr3:54692588-54692998	226	GGAAGTGGCGGTTGGAGGTGTGGGTGGGCGTTACAGCAGGCCTTAGGTGAGTTCTGCGGCCGGAGGTGGTGGGTG	243	2	y	3.2e-05	+ + +++ +++
chr5:92042635-92042977	1	CAAGTAGCCCTAGGCGAAGGCGTTGGCCACCCTAGCTGCAAGGGGCGGCTCTCACCCGCCTGGTCCCGCCCCGCC	65	2	n	6.1e-06	++++++++ ++
chr5:92042635-92042977	76	TACGGCGGAGCCTCCCTGATCCTGATTGGCTGAGGCCTGTCGTCAGGCGTTGTGATTGGCTCTGTGCCACCCCGC	94	1	y	2.3e-06	+ +++++++++++
chr5:92042635-92042977	76	TACGGCGGAGCCTCCCTGATCCTGATTGGCTGAGGCCTGTCGTCAGGCGTTGTGATTGGCTCTGTGCCACCCCGC	124	1	y	2e-06	+++ +++++++++
chr5:92042635-92042977	151	CCCGCCCCTTCACCTGGAGCTCGCAGGTTCGCTCAGCTGACGGCCTCGTCCCCACACCTACGGTCTTAAGTTTGT	151	2	n	9.3e-07	++++++++ ++
chr17:74489402-74489926	1	AGTGGTTTCCGGAATCAACACAGAAACAGCCAATCAGAATCTTCTCGCGGGAGCCAATAGTCGAGCAGATTACAA	27	1	n	3.4e-07	+++++++++++++
chr17:74489402-74489926	76	ACAGCCAATCCCGGCGGCGCTGTCACTGTTATGGTCCTGTCAGGGCCCCGGCGTCGTGGTGCTTGGGTGCTCGCC	77	1	n	6.2e-05	+++++++++ ++
chr17:74489402-74489926	301	CGAGGCCGGCGGGATGCAGCCTCCGGGCCCGCCCCCGGCCTATGCGCCTGCCAACGGGGACTTCACCTTTGTGTC	328	2	n	1.5e-06	+++++++++
chr17:74489402-74489926	376	TTCGGCGGACGCGGAAGGTGAGGCCGAGGCTGACCTCCGGGGCTCCGGGGCGGGGGGTTGGCAGAGCTGGGGGAC	419	2	y	2.6e-05	++++++++
chr12:85280365-85280656	76	TTCTCCAACGCTGCCCTGCACGCCCATCACCGCGATTTAACCAATCAGAGGTGGCTCCTTGTTCAAGAACCCGCC CAAGGGTGGGGCTTCAGGACAAGTGGGTCACGTTTTGGAGAGATCCTGGGATTAATTTTTTTAAGTGGAGAGTCC	113	1	n	8.5e-08	++++++++++++++
chr12:85280365-85280656	76	TTCTCCAACGCTGCCCTGCACGCCCATCACCGCGATTTAACCAATCAGAGGTGGCTCCTTGTTCAAGAACCCGCC CAAGGGTGGGGCTTCAGGACAAGTGGGTCACGTTTTGGAGAGATCCTGGGATTAATTTTTTTAAGTGGAGAGTCC	145	2	n	5.7e-05	+++++++
chr17:83350755-83351068	1	ACAAGAGCAGCCAATAGCCTCCTAACTCTCAAGAGTTCTCTGCGGCTGCGGAGGCAGGGCAGAGAGGGAGGGGCG TGTCGCGGGAAGCCCCGCCCCGTTCCGTCACGTGGGGCGGGATCGGAAGCGTGACGGCGTGCGCGGGGGCGGAGC	8	1	n	7.7e-05	++++++++ + +
chr17:83350755-83351068	1	ACAAGAGCAGCCAATAGCCTCCTAACTCTCAAGAGTTCTCTGCGGCTGCGGAGGCAGGGCAGAGAGGGAGGGGCG TGTCGCGGGAAGCCCCGCCCCGTTCCGTCACGTGGGGCGGGATCGGAAGCGTGACGGCGTGCGCGGGGGCGGAGC	67	2	y	7.1e-05	++ ++++++ +
chr17:83350755-83351068	1	ACAAGAGCAGCCAATAGCCTCCTAACTCTCAAGAGTTCTCTGCGGCTGCGGAGGCAGGGCAGAGAGGGAGGGGCG TGTCGCGGGAAGCCCCGCCCCGTTCCGTCACGTGGGGCGGGATCGGAAGCGTGACGGCGTGCGCGGGGGCGGAGC	89	2	n	1.4e-05	++++++++ +
chr17:83350755-83351068	1	ACAAGAGCAGCCAATAGCCTCCTAACTCTCAAGAGTTCTCTGCGGCTGCGGAGGCAGGGCAGAGAGGGAGGGGCG TGTCGCGGGAAGCCCCGCCCCGTTCCGTCACGTGGGGCGGGATCGGAAGCGTGACGGCGTGCGCGGGGGCGGAGC	106	2	y	1e-05	+ ++++++++
chr17:83350755-83351068	151	CGTGGCTGCgcgcgggcgcgggggcggggcgcggcgcggcgcggcgcggcgcTCACGGCTGCGGCTTAGgagaga	168	2	y	4.1e-07	+ +++++++++
chr17:83350755-83351068	226	gagagagagagggagagagGCCGGGCAGGCGGCGGGCGGCGCGGCTCTCAACCTGATTGACCGACTGACCCTCGG	279	3	y	1.2e-05	++++++++ +
chr5:109556858-109559133	76	GCAACTTCCTGCGTACTTCCGCCCAAGGCCCCGCCCCCTCCCTCCATGTCACGCCCACACCACTCACGCCAGGCG	105	2	n	9.2e-08	+++++++++++
chr5:109556858-109559133	151	GACGCGCGCTGCCTAGCCTTAAACACCATGGCCCCGCCTCCGTCGCGCAGTGCCAGCTCCAGCAGCCCCGCCCTC GCCGCGGGGAGGATGCACCCGGAAGTGACACCAGCGCCGGACAGGAAATATCGCGGGCAGGGTTGCAGGGCGCCA	183	2	n	1.1e-05	++++++ ++
chr5:109556858-109559133	151	GACGCGCGCTGCCTAGCCTTAAACACCATGGCCCCGCCTCCGTCGCGCAGTGCCAGCTCCAGCAGCCCCGCCCTC GCCGCGGGGAGGATGCACCCGGAAGTGACACCAGCGCCGGACAGGAAATATCGCGGGCAGGGTTGCAGGGCGCCA	217	2	n	4.7e-06	+++++++ + +
chr5:109556858-109559133	301	GTGCCATAACTGCAGAGTCGGGGATTAAGGGGGAAGGATCAGCTGGATGGGAAGTGATGGACCAGAAGTCCCGCC CACGAGCATCTGAATTTCAACACCTCAAACAGAAAGTGATGGGCAGAAAGGAAGTACCGCTCCTTCCTGTCATTC ATCAGAGTCTGAAAGGAAGTACCGTCCCTAATCATTTGTCAATCATTAATTAGACAGGAAGTCCCGCCCACTCTT	370	2	n	1.5e-05	+++++++ +
chr5:109556858-109559133	301	GTGCCATAACTGCAGAGTCGGGGATTAAGGGGGAAGGATCAGCTGGATGGGAAGTGATGGACCAGAAGTCCCGCC CACGAGCATCTGAATTTCAACACCTCAAACAGAAAGTGATGGGCAGAAAGGAAGTACCGCTCCTTCCTGTCATTC ATCAGAGTCTGAAAGGAAGTACCGTCCCTAATCATTTGTCAATCATTAATTAGACAGGAAGTCCCGCCCACTCTT	412	3	y	9.6e-05	++++ + +++
chr5:109556858-109559133	301	GTGCCATAACTGCAGAGTCGGGGATTAAGGGGGAAGGATCAGCTGGATGGGAAGTGATGGACCAGAAGTCCCGCC CACGAGCATCTGAATTTCAACACCTCAAACAGAAAGTGATGGGCAGAAAGGAAGTACCGCTCCTTCCTGTCATTC ATCAGAGTCTGAAAGGAAGTACCGTCCCTAATCATTTGTCAATCATTAATTAGACAGGAAGTCCCGCCCACTCTT	442	3	n	1.1e-05	++++++ +++
chr5:109556858-109559133	301	GTGCCATAACTGCAGAGTCGGGGATTAAGGGGGAAGGATCAGCTGGATGGGAAGTGATGGACCAGAAGTCCCGCC CACGAGCATCTGAATTTCAACACCTCAAACAGAAAGTGATGGGCAGAAAGGAAGTACCGCTCCTTCCTGTCATTC ATCAGAGTCTGAAAGGAAGTACCGTCCCTAATCATTTGTCAATCATTAATTAGACAGGAAGTCCCGCCCACTCTT	486	3	n	2.3e-05	+++++++++
chr5:109556858-109559133	301	GTGCCATAACTGCAGAGTCGGGGATTAAGGGGGAAGGATCAGCTGGATGGGAAGTGATGGACCAGAAGTCCCGCC CACGAGCATCTGAATTTCAACACCTCAAACAGAAAGTGATGGGCAGAAAGGAAGTACCGCTCCTTCCTGTCATTC ATCAGAGTCTGAAAGGAAGTACCGTCCCTAATCATTTGTCAATCATTAATTAGACAGGAAGTCCCGCCCACTCTT	513	2	n	1.9e-06	+++++++ +++
chr5:109556858-109559133	526	TCAGGCGTTTAAAAGAATGAACAGCAAGTGAGTGAAGAGGAATGAGAGGAAATCCCGCCCCCTCCCATATATCAT	579	2	n	9.2e-08	+++++++++++
chr5:109556858-109559133	526	TCAGGCGTTTAAAAGAATGAACAGCAAGTGAGTGAAGAGGAATGAGAGGAAATCCCGCCCCCTCCCATATATCAT	591	4	n	4.2e-05	++++ +++++
chr5:109556858-109559133	601	TCAATGATTCCGACAGGAAGTCACAGACCAGAAGTTCTGCCCCGCCCCCCTTCACTCACCGGAACTCCAGGCTCA	641	2	n	1.1e-06	++++++++++
chr5:109556858-109559133	751	CATCACCTGCGGGGGCAGGGCGGGGATCAGGGGAGCAGCCCGTGACGTCAGCGCGTTCCAGAAGAGCCATCGCAG	764	2	y	2.4e-05	++ +++++++
chr5:109556858-109559133	1126	CGGTAGGGAAGCGGGGCTCACCACTATGCAAAGCGACCAATGGATACACAAATGAGCAGGCAGTGAACCAGAGTG	1159	1	n	8.5e-05	++++++++ + ++
chr5:109556858-109559133	1651	GTGGCGGCAGCACTATGCTAATGAGGTCAAGGCGGGGTTTAGGTCTCATTTGCATATTACTGAGGAGAAAGCGCC	1676	2	y	7.7e-05	+ ++++++
chr5:109556858-109559133	1726	GAGCGTAGGGGGGGAGGGCGGGGCTCATGCATACGCAAAGATCAAAATGAATATGCAAACGAAGCGCTATCCGAT	1737	2	y	1.9e-06	+++ +++++++
chr5:109556858-109559133	1876	TTGGTAGCTCTTGCTCGGGCCCCGCCCACCGCGGCGATTGACAGGCAGCCCCGCCCCCGCTCACTCCTCACCCCG	1896	2	n	6.1e-06	+++++++ ++
chr5:109556858-109559133	1876	TTGGTAGCTCTTGCTCGGGCCCCGCCCACCGCGGCGATTGACAGGCAGCCCCGCCCCCGCTCACTCCTCACCCCG	1910	3	y	8.3e-06	+++++++++
chr5:109556858-109559133	1876	TTGGTAGCTCTTGCTCGGGCCCCGCCCACCGCGGCGATTGACAGGCAGCCCCGCCCCCGCTCACTCCTCACCCCG	1925	2	n	4.1e-07	+++++++++ +
chr5:109556858-109559133	2026	GTCGCCGGCGGGGCCGCGGACGCTGCAGTGATTGACAGCTGGTTCGGTCCGAGCCGGTCCGAGTCGAGGGCGCCC	2054	3	y	1.1e-06	++++++++++
chr5:109556858-109559133	2101	AGGCCGCTTAGAGCCGAAAACGGGAAGCCGGGGGCGGGGGTTGGGGCGACGGGGCGGGGCCACGGCAATAAACGG	2128	2	y	1.5e-06	+++++++++
chr5:109556858-109559133	2101	AGGCCGCTTAGAGCCGAAAACGGGAAGCCGGGGGCGGGGGTTGGGGCGACGGGGCGGGGCCACGGCAATAAACGG	2148	2	y	4.7e-06	++ ++++++++
chr5:109556858-109559133	2176	ATGCGGCGACTCACCGACATGGGCGTGGCCCGGCTTCCTCTTCCCATCAATCACCCGGATAgggggaagcggggg gggggcgggggggggggggTGGACT	2220	4	n	2.7e-05	+++ ++++++
chr5:109556858-109559133	2176	ATGCGGCGACTCACCGACATGGGCGTGGCCCGGCTTCCTCTTCCCATCAATCACCCGGATAgggggaagcggggg gggggcgggggggggggggTGGACT	2249	2	y	1.7e-07	+++++++++++
chr12:36042451-36042770	1	TGCAGTGCCGCGCCCGCAGCGGCTCCCACCCGCTCTGCAACCTGCGGCCGCAGCGGATCCGCCGATcgcgcgccc cgccccgccgccTCGTCTCGCCCTGCACTCTGATTGGCCACTGCTAGGGAACAAAGGTAGAGATATGCAAATCAA	25	2	n	6.8e-05	+++ +++ +++
chr12:36042451-36042770	1	TGCAGTGCCGCGCCCGCAGCGGCTCCCACCCGCTCTGCAACCTGCGGCCGCAGCGGATCCGCCGATcgcgcgccc cgccccgccgccTCGTCTCGCCCTGCACTCTGATTGGCCACTGCTAGGGAACAAAGGTAGAGATATGCAAATCAA	74	2	n	6.1e-06	++++++++ ++
chr12:36042451-36042770	1	TGCAGTGCCGCGCCCGCAGCGGCTCCCACCCGCTCTGCAACCTGCGGCCGCAGCGGATCCGCCGATcgcgcgccc cgccccgccgccTCGTCTCGCCCTGCACTCTGATTGGCCACTGCTAGGGAACAAAGGTAGAGATATGCAAATCAA	102	1	y	2.8e-07	+++++++++++++
chr12:36042451-36042770	151	TGCGCTCTGGGGTCCGGGAGAGGCGGGGCAGCTCAGCggaggagaaggaggaggaggaggagggggCCCCGAGAC	167	2	y	6.8e-06	++ + ++++++
chr12:36042451-36042770	226	TGTCTGGAGGGAGCCGGCCTCTGGCTCACGAGACTGTGGCCTCTGTATAATTTCCCCCCTCCCAGGTGAACAGCA GAGGGCGGGGCTCCACGCT	299	2	y	3.3e-06	++ +++++++
chr2:30474246-30474414	1	TTAGCTGGGCAGCAGCGCCCCGCCCCACTGTAGATTAGCCAATAGAAGCGTGTAGAGCCTTCCGACTGACAGCCA	19	2	n	1.5e-05	++++++++ +
chr2:30474246-30474414	1	TTAGCTGGGCAGCAGCGCCCCGCCCCACTGTAGATTAGCCAATAGAAGCGTGTAGAGCCTTCCGACTGACAGCCA	36	1	n	4.8e-06	++++++++ + +++
chr2:30474246-30474414	1	TTAGCTGGGCAGCAGCGCCCCGCCCCACTGTAGATTAGCCAATAGAAGCGTGTAGAGCCTTCCGACTGACAGCCA	63	3	y	3.4e-05	++ ++++++
chr2:30474246-30474414	76	CTGCCCTCCCCGGGACCACTTGACTGGCCAATCAGACCAAGGCGGTTCCTTTGTGCTATTCAAATAACGAACGGA	100	1	n	1.5e-05	++++++++++++ +
chr7:143460977-143461296	1	AGCACAGCGCACTCGGCCTGTGGAACGCCCAGCCCGCTGCGCCCCTTTATACGCGCTGGCCCCACCCCCGCGCGC	61	2	n	6.1e-06	+++ +++++ +
chr7:143460977-143461296	76	GCGGGCCTCCTCACGATTAGCATAATGTAGTATTTTCAGTTTCAACAACACCGCGGCGATTGGAGGGTGCAGCCC GCCCCGCCCACAGAGGCCCTGCCCCCGCGCCACGCTCATTGGCTGCGCGCACACAcccccggggccgggcggggc gggTGACGGGCGGGCGCTGATTGGCGGCCGCACGGCGAGCGGGCTGCGCGGGACAAGGGGCGGGGCTCGAGTTAA	148	2	n	6.1e-06	++++++++ ++
chr7:143460977-143461296	76	GCGGGCCTCCTCACGATTAGCATAATGTAGTATTTTCAGTTTCAACAACACCGCGGCGATTGGAGGGTGCAGCCC GCCCCGCCCACAGAGGCCCTGCCCCCGCGCCACGCTCATTGGCTGCGCGCACACAcccccggggccgggcggggc gggTGACGGGCGGGCGCTGATTGGCGGCCGCACGGCGAGCGGGCTGCGCGGGACAAGGGGCGGGGCTCGAGTTAA	182	1	y	4.8e-06	+ ++ ++++++++
chr7:143460977-143461296	76	GCGGGCCTCCTCACGATTAGCATAATGTAGTATTTTCAGTTTCAACAACACCGCGGCGATTGGAGGGTGCAGCCC GCCCCGCCCACAGAGGCCCTGCCCCCGCGCCACGCTCATTGGCTGCGCGCACACAcccccggggccgggcggggc gggTGACGGGCGGGCGCTGATTGGCGGCCGCACGGCGAGCGGGCTGCGCGGGACAAGGGGCGGGGCTCGAGTTAA	218	2	y	6.1e-06	++ ++++++++
chr7:143460977-143461296	76	GCGGGCCTCCTCACGATTAGCATAATGTAGTATTTTCAGTTTCAACAACACCGCGGCGATTGGAGGGTGCAGCCC GCCCCGCCCACAGAGGCCCTGCCCCCGCGCCACGCTCATTGGCTGCGCGCACACAcccccggggccgggcggggc gggTGACGGGCGGGCGCTGATTGGCGGCCGCACGGCGAGCGGGCTGCGCGGGACAAGGGGCGGGGCTCGAGTTAA	239	1	y	6.7e-06	++ +++++++++ +
chr7:143460977-143461296	76	GCGGGCCTCCTCACGATTAGCATAATGTAGTATTTTCAGTTTCAACAACACCGCGGCGATTGGAGGGTGCAGCCC GCCCCGCCCACAGAGGCCCTGCCCCCGCGCCACGCTCATTGGCTGCGCGCACACAcccccggggccgggcggggc gggTGACGGGCGGGCGCTGATTGGCGGCCGCACGGCGAGCGGGCTGCGCGGGACAAGGGGCGGGGCTCGAGTTAA	279	2	y	2.1e-06	+ ++++++++
chr17:24141515-24141909	1	CTCAGCGTCCTCCTCCCCGCGGCGGAGCCCCAGCAATGGCCGCCCTCATCCTgcgcccgccccgccgcctgccgc	56	2	n	6.1e-06	++++++++ ++
chr17:24141515-24141909	76	ccccagcgccaccccgcccccgcgcgACGCTAAGCAGGACTTCCGCGACGTAGCCGCCGCTCCTCTCGCCCATTG GTCAGTATAGCTGTCATTGGCGGCGGGCCGTGAGGGCCCCGCCCCCGACCAAGAGCCGTATTTCCGGGTTGGGGC	88	2	n	4.1e-07	+++++++++ +
chr17:24141515-24141909	76	ccccagcgccaccccgcccccgcgcgACGCTAAGCAGGACTTCCGCGACGTAGCCGCCGCTCCTCTCGCCCATTG GTCAGTATAGCTGTCATTGGCGGCGGGCCGTGAGGGCCCCGCCCCCGACCAAGAGCCGTATTTCCGGGTTGGGGC	141	1	y	2.1e-05	+ ++ ++++++++
chr17:24141515-24141909	76	ccccagcgccaccccgcccccgcgcgACGCTAAGCAGGACTTCCGCGACGTAGCCGCCGCTCCTCTCGCCCATTG GTCAGTATAGCTGTCATTGGCGGCGGGCCGTGAGGGCCCCGCCCCCGACCAAGAGCCGTATTTCCGGGTTGGGGC	160	1	y	2.1e-05	+++ + ++++++ +
chr17:24141515-24141909	76	ccccagcgccaccccgcccccgcgcgACGCTAAGCAGGACTTCCGCGACGTAGCCGCCGCTCCTCTCGCCCATTG GTCAGTATAGCTGTCATTGGCGGCGGGCCGTGAGGGCCCCGCCCCCGACCAAGAGCCGTATTTCCGGGTTGGGGC	188	2	n	2.1e-06	+++++++++
chr17:24141515-24141909	226	CCGGCGCGCTTGTCGAGGGAGGCTGAGCGAGCCAATCAGAAGTGACGGGGAGGGGCCGGGGCCGGAGCGCCGAGC	254	1	n	5.9e-07	+++++++++++++
chr2:132815995-132816362	76	ACGGCTTCCGGAAGCCTGGCGACTTCCGTCTCTCTGAACTCTTTGATTGGCTACACTTCATCCCGCCCCCTAGTC	115	1	y	4.8e-07	++ ++++++++++
chr2:132815995-132816362	76	ACGGCTTCCGGAAGCCTGGCGACTTCCGTCTCTCTGAACTCTTTGATTGGCTACACTTCATCCCGCCCCCTAGTC	137	2	n	5.2e-07	++++++++++
chr2:132815995-132816362	226	TGGGCTTGTGCTCGGCCTTCCCCGCCCTGCGTCTGGCGTTCTGGCGCGCAGTGACGCGGGCACCGGGCGGCTCCG	246	2	n	3.7e-05	+++++++ +
chr1:136624659-136625112	1	TGGCGTCCCCGGACTTCCCGCCCCTTGGGCTCCACCTCCGGAGCGCCTTCTCCCTAGAAACCCTCAGCCACTGTC	17	2	n	2.1e-06	++++++++ +
chr1:136624659-136625112	76	TGCCCCTCAGCAGGGCCACCAATCACGTCCCCTCGCTGCGGAAGACCCTCCGCTGTCCGCCTCCAAGTCCCCGCC CCTCCCACCTAGCCCCCAGCAGCTCCGCCCAACCGCCCGCTTGATTGACAGGCTAGCCAGGCGGAAACTGAGGCG	145	2	n	1.2e-06	++++++++ ++
chr1:136624659-136625112	76	TGCCCCTCAGCAGGGCCACCAATCACGTCCCCTCGCTGCGGAAGACCCTCCGCTGTCCGCCTCCAAGTCCCCGCC CCTCCCACCTAGCCCCCAGCAGCTCCGCCCAACCGCCCGCTTGATTGACAGGCTAGCCAGGCGGAAACTGAGGCG	192	3	y	1.1e-06	++++++++++
chr1:136624659-136625112	376	cggcggcggcggAACCCGTAAGTGTGGCCggcgggccggggcgggcgcgggagcggccaagaaggccgcggggtc	410	2	y	1.1e-05	+ ++++++++
chr19:3575687-3576352	1	GGTTCACCGACACCATCAGCGAAGCGCCCAAAATGGCGGACGTATCAAGCAGGCCTTGAGTTACCCCCGCCCTCC CTCCGGCCGCCCCGCAGCCAATCACAGGATAGACCCCGCCCCTTCACACGGATCATTGGCTTGTCTCTCCCGCCC CCCACAACCTATTGGACCGCCCAGCGGTTCCCTCGACTCCACTTCGATTGGCTTTGAGGTCTTGTCAGTCAAACG	66	2	n	1.9e-06	+++++++ +++
chr19:3575687-3576352	1	GGTTCACCGACACCATCAGCGAAGCGCCCAAAATGGCGGACGTATCAAGCAGGCCTTGAGTTACCCCCGCCCTCC CTCCGGCCGCCCCGCAGCCAATCACAGGATAGACCCCGCCCCTTCACACGGATCATTGGCTTGTCTCTCCCGCCC CCCACAACCTATTGGACCGCCCAGCGGTTCCCTCGACTCCACTTCGATTGGCTTTGAGGTCTTGTCAGTCAAACG	90	1	n	6.8e-07	++++++++++ +++
chr19:3575687-3576352	1	GGTTCACCGACACCATCAGCGAAGCGCCCAAAATGGCGGACGTATCAAGCAGGCCTTGAGTTACCCCCGCCCTCC CTCCGGCCGCCCCGCAGCCAATCACAGGATAGACCCCGCCCCTTCACACGGATCATTGGCTTGTCTCTCCCGCCC CCCACAACCTATTGGACCGCCCAGCGGTTCCCTCGACTCCACTTCGATTGGCTTTGAGGTCTTGTCAGTCAAACG	110	2	n	9.3e-07	++++++++ ++
chr19:3575687-3576352	1	GGTTCACCGACACCATCAGCGAAGCGCCCAAAATGGCGGACGTATCAAGCAGGCCTTGAGTTACCCCCGCCCTCC CTCCGGCCGCCCCGCAGCCAATCACAGGATAGACCCCGCCCCTTCACACGGATCATTGGCTTGTCTCTCCCGCCC CCCACAACCTATTGGACCGCCCAGCGGTTCCCTCGACTCCACTTCGATTGGCTTTGAGGTCTTGTCAGTCAAACG	144	2	n	9.3e-07	++++++++++
chr19:3575687-3576352	1	GGTTCACCGACACCATCAGCGAAGCGCCCAAAATGGCGGACGTATCAAGCAGGCCTTGAGTTACCCCCGCCCTCC CTCCGGCCGCCCCGCAGCCAATCACAGGATAGACCCCGCCCCTTCACACGGATCATTGGCTTGTCTCTCCCGCCC CCCACAACCTATTGGACCGCCCAGCGGTTCCCTCGACTCCACTTCGATTGGCTTTGAGGTCTTGTCAGTCAAACG	191	1	y	1.1e-05	++ +++++++++
chr19:3575687-3576352	1	GGTTCACCGACACCATCAGCGAAGCGCCCAAAATGGCGGACGTATCAAGCAGGCCTTGAGTTACCCCCGCCCTCC CTCCGGCCGCCCCGCAGCCAATCACAGGATAGACCCCGCCCCTTCACACGGATCATTGGCTTGTCTCTCCCGCCC CCCACAACCTATTGGACCGCCCAGCGGTTCCCTCGACTCCACTTCGATTGGCTTTGAGGTCTTGTCAGTCAAACG	212	3	n	6.6e-05	+++++ +++
chr19:3575687-3576352	451	AGAAGCCAATGGGGTAACACAATGACAGCAGGCGGTGGGGTAACGGCCGCGGGGGACGAGGGGGGGGGGAAAACC	453	1	n	7.3e-05	+++++++ ++
chr13:112800689-112801102	1	TAACCAGCTTCCAGATTCGGGGCGGGCTCCGCAAGTCGGCGGGGCGGGGCCGATGGCGCTGATTGGCTGTCTGCG	16	2	y	3e-05	++++++++
chr13:112800689-112801102	1	TAACCAGCTTCCAGATTCGGGGCGGGCTCCGCAAGTCGGCGGGGCGGGGCCGATGGCGCTGATTGGCTGTCTGCG	38	2	y	6.1e-06	++ ++++++++
chr13:112800689-112801102	1	TAACCAGCTTCCAGATTCGGGGCGGGCTCCGCAAGTCGGCGGGGCGGGGCCGATGGCGCTGATTGGCTGTCTGCG	56	1	y	1.9e-07	++ +++++++++++
chr13:112800689-112801102	76	CTGGCCTGGGTTTCGTCCCCGCGCGCTGCAGCCGGCGAGACCGCGCACTGGCCGGAGCGGCGCGCCTGGGGCGGG	140	2	y	1.9e-05	++++++++
chr9:101034527-101035091	1	TAGGTTCTCCAGGTGGACGTTCTCGCCGCGCCCCTCCCAGGCGCAGCGCCTATTGGCTGGGAGGCTCGTGCGCCG	46	1	y	7.5e-06	++ ++ ++++++++
chr9:101034527-101035091	76	CGAGCCCGGCGCGCTGTGATAGGGCGGGAGCGGAGGGGGCGGGACGCACTGGCGCCCGTGACTCACTCGCTTGTG	93	2	y	1.9e-05	++ +++++++
chr9:101034527-101035091	76	CGAGCCCGGCGCGCTGTGATAGGGCGGGAGCGGAGGGGGCGGGACGCACTGGCGCCCGTGACTCACTCGCTTGTG	108	2	y	9.2e-08	+++++++++++
chr9:101034527-101035091	301	CACCGCCCGAATCCTAATCGCCGCCGCCAtttttttttttttttttttttGACTGCCAGCGTGACACACACTGCA	350	3	y	9.2e-05	+++ ++ +++
chr5:122820869-122821602	1	GGGCCCCTCCCCCGGGGCTGGACCTTCCCTGCCCTCCAGCTCAGGGCGGGGCCCACGCGAAGCGCGCGCGCGCGT	40	2	y	5.9e-05	+++++++
chr5:122820869-122821602	76	GCGGTAATGGGCGGGAAAGAGCGGGCGCCCCTCACCTGCAGCAGGGGCAGGAGCAGCTGGTTGAGCTTCCGCCGC	80	2	y	2e-05	+ +++++++
chr5:122820869-122821602	376	GCTGCAGCCGCCCGGCACCTTAACCCGCCCAAGACTGTTTCCCACAGTAGCGGGGGCCTCAGTGTCCCTCTCCCA CCCCGGCGGTGCCTTCGACCAATCAAAGACCAGAAGGAAGACTGACAGCCAATCAAAACAGCCAAACCTGTAGTG	399	2	n	6.5e-05	+++++++
chr5:122820869-122821602	376	GCTGCAGCCGCCCGGCACCTTAACCCGCCCAAGACTGTTTCCCACAGTAGCGGGGGCCTCAGTGTCCCTCTCCCA CCCCGGCGGTGCCTTCGACCAATCAAAGACCAGAAGGAAGACTGACAGCCAATCAAAACAGCCAAACCTGTAGTG	447	2	n	4.2e-05	+++ ++++ +
chr5:122820869-122821602	376	GCTGCAGCCGCCCGGCACCTTAACCCGCCCAAGACTGTTTCCCACAGTAGCGGGGGCCTCAGTGTCCCTCTCCCA CCCCGGCGGTGCCTTCGACCAATCAAAGACCAGAAGGAAGACTGACAGCCAATCAAAACAGCCAAACCTGTAGTG	466	1	n	6.7e-06	++++++++++ ++
chr5:122820869-122821602	376	GCTGCAGCCGCCCGGCACCTTAACCCGCCCAAGACTGTTTCCCACAGTAGCGGGGGCCTCAGTGTCCCTCTCCCA CCCCGGCGGTGCCTTCGACCAATCAAAGACCAGAAGGAAGACTGACAGCCAATCAAAACAGCCAAACCTGTAGTG	496	1	n	4.1e-07	++++++++++ +++
chr5:122820869-122821602	526	AGCGGGGGTAGGGGAGGGGGTGGGACATAAATGGTGTTATGGCAAATCGGTTCCCTACAGAAACGCTCAACCAAG	539	2	y	1.9e-06	+++++++ +++
chr18:90579552-90579985	1	GGGAGACGGATAGCCAATTAGAGAACAAACACAAGTTCTACTATAATGCAAATCCCTGCGGATCTGGAAAAGGTC	11	1	n	1.8e-05	++++++++ ++++
chr18:90579552-90579985	76	TGGCCCTGGACTGGGCGCCTGAGAACCTCTTCACTGTGTCCTTTCAGCACACTCTAACCCTAAGGTAGGTGCTCA TGTCACTCAAGACTCACTGGCCAATCAGAGCCTTCAGGAGAACCTTCCAATCAGAAGATGAGGCGGTTTCTTCCG	150	3	n	2.7e-05	+++++ +++
chr18:90579552-90579985	76	TGGCCCTGGACTGGGCGCCTGAGAACCTCTTCACTGTGTCCTTTCAGCACACTCTAACCCTAAGGTAGGTGCTCA TGTCACTCAAGACTCACTGGCCAATCAGAGCCTTCAGGAGAACCTTCCAATCAGAAGATGAGGCGGTTTCTTCCG	168	1	n	2.1e-08	++++++++++++++
chr17:46890474-46890834	1	CCATCCACCAGGACCTTTGTCTCCCCACCCCCTCCTGTCAGCCGGCCCCGCCCTCCTTCCCGCCCCTCCAACGCG	24	2	n	1.9e-06	+++ +++++++
chr17:46890474-46890834	1	CCATCCACCAGGACCTTTGTCTCCCCACCCCCTCCTGTCAGCCGGCCCCGCCCTCCTTCCCGCCCCTCCAACGCG	47	2	n	7.7e-06	+++++++ ++
chr17:46890474-46890834	1	CCATCCACCAGGACCTTTGTCTCCCCACCCCCTCCTGTCAGCCGGCCCCGCCCTCCTTCCCGCCCCTCCAACGCG	59	2	n	1.2e-06	++++++++ ++
chr17:46890474-46890834	76	AAGAAACCAATAGGCGAGGAGAATATGGAGGGAGCTGACGTCACCGCAGCTGGCCAATCACAGCGCGCGTTGGTG	79	1	n	5.5e-05	+++++++ ++ +
chr17:46890474-46890834	76	AAGAAACCAATAGGCGAGGAGAATATGGAGGGAGCTGACGTCACCGCAGCTGGCCAATCACAGCGCGCGTTGGTG	126	1	n	4.1e-07	++++++++++ +++
chr17:24414384-24414810	1	AGGCAACCCGAGTAGCTCCATCCACACAGATCCGGTAGGCGCCAAAGAGCACAAACCTCTGGTGCCGGTCAGCCA ATCATCGCGCGCTTCAGAATGAGCAAAACAAGTCCAGGAAACTTTAGACCAGTCGGGGAGGGGGGGCGGGGGGGG	70	1	n	6.7e-06	++++++++++ ++
chr17:24414384-24414810	1	AGGCAACCCGAGTAGCTCCATCCACACAGATCCGGTAGGCGCCAAAGAGCACAAACCTCTGGTGCCGGTCAGCCA ATCATCGCGCGCTTCAGAATGAGCAAAACAAGTCCAGGAAACTTTAGACCAGTCGGGGAGGGGGGGCGGGGGGGG	135	2	y	1.7e-07	+++++++++++
chr17:24414384-24414810	151	GGACCGTAGGCGCTACGACGCTCCGCCCACACACAGTTGCTGTCCTTTAGTCCTCCACCGCTAACTTGCATTGGC TGAGTGTGCTTACGTCATCGTCGCGCGACGACGGCTGCGCCTTCCCGCTTCTCACCTCTGACGACAAAGTTGCGC	214	1	y	9.4e-05	++ ++++++++
chr7:25267463-25268509	1	TGATTGGCCGTAGTCCGGCCACCCGACAGCCAATCATGCAGAGGAAAGGTGACATCACTAGTTCTCCTCCCATCC	1	3	y	8.4e-05	++++++ + +
chr7:25267463-25268509	151	GTGAGGTCATTGCACCGCCCCTGCCGTTGCTGATTGGCTGCGGGGCTCGCGGGTGTCGGTTGGCTGCTCTTTGCA	177	1	y	1.5e-06	+ +++++++++++
chr7:25267463-25268509	526	GAGCTTGTTTATTGGAGGGCATATCCTTTAGTCCCGCCTCCCTTCATTTTATTGGTTACTGTCCCTCGCAGGGGG	558	2	n	6.1e-06	++++++ +++
chr7:25267463-25268509	526	GAGCTTGTTTATTGGAGGGCATATCCTTTAGTCCCGCCTCCCTTCATTTTATTGGTTACTGTCCCTCGCAGGGGG	570	1	y	3.5e-05	+ + + ++++++++
chr7:25267463-25268509	601	TGGTTTCTTGCTTAAGATGGATGGTGATTGGGTACTGTAATTGTCATTCGGCATATAAATAGTCTGTTAATTGGT	621	1	y	5.5e-05	+ +++++++ ++
chr7:25267463-25268509	751	GGTCCCGGAGGGAGGCCGGTCTTGGAATTTGACCCCGCCCCTTGGCGCTGCCGGAAGAGCGCAATTGGTGGTAGC	784	2	n	2.1e-06	++++++++ +
chr7:25267463-25268509	901	GGGGTTGTGGCCGTTTATTGGCTGGTTGCTCCAGCTGTTGCAGGTCCATTCACCATTTTGTGTGTTGGAGTAAAA	911	1	y	1.8e-05	++ + ++++++++
chr7:25267463-25268509	976	AAAAAAGGGAGAATCGAGAGGGAGAGCCGGAGGGGGGGCGGGGAGGGACCGGACCGGACTGAGCCGGGGCC	1007	2	y	1.7e-07	+++++++++++
chr9:108002395-108002790	76	GCACGAGAGGCACGCCCTGACTGACGGAACAGTTGACGAATCAACGCGAAGAACTCCTTCAGGCGTCCCAAGAAG	93	3	y	1.6e-05	+++ ++++ +
chr9:108002395-108002790	151	AGGCTATTGATTGGAGATAACCTCAGTTAGGGGCGGGTTCTTTGCTGTCCTTGGTTACTATGACGCCCGGCCCCC GCCCCCTCGGCTGGCCGCCATCTTGTTGTTGATCCGTACCCAGTGGGCAGCGCCAGGAGCTGGACCGAGCGGCCG	177	2	y	1.1e-05	++++++++
chr9:108002395-108002790	151	AGGCTATTGATTGGAGATAACCTCAGTTAGGGGCGGGTTCTTTGCTGTCCTTGGTTACTATGACGCCCGGCCCCC GCCCCCTCGGCTGGCCGCCATCTTGTTGTTGATCCGTACCCAGTGGGCAGCGCCAGGAGCTGGACCGAGCGGCCG	223	2	n	9.2e-08	+++++++++++
chr9:108002395-108002790	301	GTGAGGGGCCGCTGCTGCGGGGCTCAGCCACCAGCGCCGCCTGCCAGGGGGGCGGGCCGAGACCTGGAGGCCCGG	346	2	y	1.1e-06	++++++++++
chr9:21955635-21956245	1	CGTGTTTTGATCATTGGCTGACAGCTCCAGCGACGAACTTAGTCTGTGAACTATAGCCAATGAGGCCTCTGTGTG GGCGGGCCCAAGATGAGATATCGCTTTTGATTGGTCAGCGGCACTCAGCAAATGGCGGAGGCGCTGAGGCGGGTG	7	1	y	4.3e-05	+ + ++++++++
chr9:21955635-21956245	1	CGTGTTTTGATCATTGGCTGACAGCTCCAGCGACGAACTTAGTCTGTGAACTATAGCCAATGAGGCCTCTGTGTG GGCGGGCCCAAGATGAGATATCGCTTTTGATTGGTCAGCGGCACTCAGCAAATGGCGGAGGCGCTGAGGCGGGTG	54	1	n	4.6e-05	++++++++ ++ +
chr9:21955635-21956245	1	CGTGTTTTGATCATTGGCTGACAGCTCCAGCGACGAACTTAGTCTGTGAACTATAGCCAATGAGGCCTCTGTGTG GGCGGGCCCAAGATGAGATATCGCTTTTGATTGGTCAGCGGCACTCAGCAAATGGCGGAGGCGCTGAGGCGGGTG	71	2	y	7.7e-06	+ + +++++++
chr9:21955635-21956245	1	CGTGTTTTGATCATTGGCTGACAGCTCCAGCGACGAACTTAGTCTGTGAACTATAGCCAATGAGGCCTCTGTGTG GGCGGGCCCAAGATGAGATATCGCTTTTGATTGGTCAGCGGCACTCAGCAAATGGCGGAGGCGCTGAGGCGGGTG	99	1	y	3.4e-06	+++ ++++++++++
chr9:21955635-21956245	1	CGTGTTTTGATCATTGGCTGACAGCTCCAGCGACGAACTTAGTCTGTGAACTATAGCCAATGAGGCCTCTGTGTG GGCGGGCCCAAGATGAGATATCGCTTTTGATTGGTCAGCGGCACTCAGCAAATGGCGGAGGCGCTGAGGCGGGTG	138	2	y	3e-05	+ + ++++++
chr9:21955635-21956245	376	GGAGGGCTGGACCTGGCAATGCGTTACCCAATGGCGGGCTAGTTCGCGCCTGAGTGACAGTTCGATAGGCAAATG	400	1	n	9.4e-05	++ +++++ + ++
chr9:21955635-21956245	376	GGAGGGCTGGACCTGGCAATGCGTTACCCAATGGCGGGCTAGTTCGCGCCTGAGTGACAGTTCGATAGGCAAATG	426	3	y	2e-06	+++ ++++++
chr1:52119298-52119635	76	GGGGGGGGGACGGTGCGCTGATGGAACAGCCGGCCAATCTCTGCCGCTGATTGGCTGAGGCGGAAGGAGGCGGGA	119	1	y	4.8e-07	++ +++++++++++
chr1:52119298-52119635	76	GGGGGGGGGACGGTGCGCTGATGGAACAGCCGGCCAATCTCTGCCGCTGATTGGCTGAGGCGGAAGGAGGCGGGA	139	2	y	4.7e-06	+++ ++++++
chr10:69352878-69353198	76	CGCCAATCCGATTGCACGTAGACGTTCAAAGGAGCCAATCAGAGCTGAGCTACGCTTGGGCGGGGCTGCCTGGGA	107	1	n	1.2e-07	+++++++++++++
chr10:69352878-69353198	76	CGCCAATCCGATTGCACGTAGACGTTCAAAGGAGCCAATCAGAGCTGAGCTACGCTTGGGCGGGGCTGCCTGGGA	129	2	y	3.9e-05	+ +++++++
chr10:69352878-69353198	151	GCGCAGAGCGCGAAAGGGAGCGGAAACCGCGGCCAGAGGAATTGCAGGAGGGCGGGCGCCAACTGACTCTTGAGC	196	2	y	7.7e-06	++ +++++++
chr11:23007619-23008564	76	ACAAGCTACCACATCTCACTCACTGGTCTGAGTGACAGACACTTCCTATGTCTAGTGTCTTACTGGTCAGTCGAG	104	3	y	2e-06	+++ ++++++
chr11:23007619-23008564	151	AAAAAAGAGGGTGGGACAAATAAGTATTCTCCTTCTGATTGGTCAACCCGCTGGTTCTTGTCAATTAGAGATGAA	155	2	y	2.8e-05	++ +++ +++
chr11:23007619-23008564	151	AAAAAAGAGGGTGGGACAAATAAGTATTCTCCTTCTGATTGGTCAACCCGCTGGTTCTTGTCAATTAGAGATGAA	182	1	y	5.9e-07	++++++++++++++
chr11:23007619-23008564	751	CTGTGAGCTAGGTGGCAGCGCCTGCACGCCGCCCTGGGCGGGCGCGGGCGCTTGGGCTTGGAGGCGGGGCGATGG	782	2	y	5.9e-05	+++++++
chr11:23007619-23008564	751	CTGTGAGCTAGGTGGCAGCGCCTGCACGCCGCCCTGGGCGGGCGCGGGCGCTTGGGCTTGGAGGCGGGGCGATGG	808	2	y	1.3e-05	++ ++++++
chr14:21075834-21076341	1	GTGCCCATGTGACTGCGAACCGGGTTGCCAGCGGCGCGGCCATTTTTGAGGCGGGCACTCAACCTTATTGCCCTG	45	2	y	5.9e-05	+ ++++++
chr14:21075834-21076341	226	GCCCTGGGGGCGGCGCTACAGCGGACCGACGGGGGCGGGGCGTCCGCCCTCCTTTGGCCGCAGCCAATCAGCGGG	254	2	y	2.5e-06	+++++++++
chr14:21075834-21076341	226	GCCCTGGGGGCGGCGCTACAGCGGACCGACGGGGGCGGGGCGTCCGCCCTCCTTTGGCCGCAGCCAATCAGCGGG	286	1	n	4.8e-07	+++++++++++ ++
chr14:21075834-21076341	301	TGGGGCCAGCTcgccccgggccgcccgcgcgcggggTGTGTAAGGACGAGCTCTCCGACGCTGAGTGCCAGAGCT	362	3	y	8.4e-05	+++ ++ +++
chr7:142095320-142095565	1	TGCCGAGCGAAAAAGCCCCTGACGTCACCTGCAGCCAATCAGAGTGAGCCGCTCGGGGGCAGGTGACGTCAGCGG	32	1	n	1.9e-07	+++++++++++++
chr7:142095320-142095565	151	GCTTCTCGGGCATCGGTTCTTAAAGGGGCCACGCACGCCGCAGCTCCCCACCTCCAGGAAGCCTTCCCAGCTCAG	197	2	n	3.7e-05	+++ ++ ++
chr5:123132410-123132857	1	AGAGCCCAGTAGAGCGACAGGGCAGGGGCGGGGTTACAGGGCAGGGCTACGAGGCTCCACCCACGGGCAGCTGGC	22	2	y	2.8e-06	+ ++++++++
chr5:123132410-123132857	151	GTATTTGTCTTGCAGTCCCAGGGGAAATGAAGAACCTGAAGAAATGGATGCTGAACCGCAAGCGCAGTGCACCCC CACCCCCTGCTTAGTAGATTCGTGGTTTCTGCCTCTTCACAGAGACAGCCTTTAGTTGGCAAGCTCCGCCTTCTA	224	2	n	4.7e-06	+++ ++++++
chr5:123132410-123132857	301	GCAAGGACCCTTTGATTGGCCGGTCCCACCCCCACAGAGAAAACGTTGATTGGCGGGCTGTATCCTAGCACCCGG	309	1	y	1.7e-06	+++ ++++++++++
chr5:123132410-123132857	301	GCAAGGACCCTTTGATTGGCCGGTCCCACCCCCACAGAGAAAACGTTGATTGGCGGGCTGTATCCTAGCACCCGG	325	2	n	7.7e-06	+++ +++++ +
chr5:123132410-123132857	301	GCAAGGACCCTTTGATTGGCCGGTCCCACCCCCACAGAGAAAACGTTGATTGGCGGGCTGTATCCTAGCACCCGG	347	3	y	3.3e-05	++++++ + +
chr2:62664155-62664562	1	GGCTTCTGGTAAGAACTCGAAAGAACCAGTAAGAGAGATGGACTGGAATCCAGGAGACAGGCTGCAGCCAATCAC AGGTGAGATGGGCGGGGCTTGCTCTGGCAGGGGTGGGCCTGTGGTCGGGGGCGGGACTCCAGGCAGAGCCGGCTC	65	1	n	6.8e-07	++++++++++ +++
chr2:62664155-62664562	1	GGCTTCTGGTAAGAACTCGAAAGAACCAGTAAGAGAGATGGACTGGAATCCAGGAGACAGGCTGCAGCCAATCAC AGGTGAGATGGGCGGGGCTTGCTCTGGCAGGGGTGGGCCTGTGGTCGGGGGCGGGACTCCAGGCAGAGCCGGCTC	81	2	y	2.6e-05	+ +++++++
chr2:62664155-62664562	1	GGCTTCTGGTAAGAACTCGAAAGAACCAGTAAGAGAGATGGACTGGAATCCAGGAGACAGGCTGCAGCCAATCAC AGGTGAGATGGGCGGGGCTTGCTCTGGCAGGGGTGGGCCTGTGGTCGGGGGCGGGACTCCAGGCAGAGCCGGCTC	102	2	y	1.9e-05	+ ++++ +++
chr2:62664155-62664562	1	GGCTTCTGGTAAGAACTCGAAAGAACCAGTAAGAGAGATGGACTGGAATCCAGGAGACAGGCTGCAGCCAATCAC AGGTGAGATGGGCGGGGCTTGCTCTGGCAGGGGTGGGCCTGTGGTCGGGGGCGGGACTCCAGGCAGAGCCGGCTC	120	2	y	2.1e-06	+++++++++
chr4:139192504-139192999	151	CAGTCCCTCCGGAACGCCACAGCCCTGGCCGCGCAGGAGCGTTGCGCCTGGCCCGCCCCTCCTGAGACAGGACAC GCCCACTCGACCACAGGGCCTgcccccgtccccgccccccgcgcggcgcTCCATACTTGGCGATCGCTGCGGCCC	202	2	n	1.2e-06	++++++++ ++
chr4:139192504-139192999	151	CAGTCCCTCCGGAACGCCACAGCCCTGGCCGCGCAGGAGCGTTGCGCCTGGCCCGCCCCTCCTGAGACAGGACAC GCCCACTCGACCACAGGGCCTgcccccgtccccgccccccgcgcggcgcTCCATACTTGGCGATCGCTGCGGCCC	223	2	n	8.1e-05	+ +++++ +++
chr4:139192504-139192999	151	CAGTCCCTCCGGAACGCCACAGCCCTGGCCGCGCAGGAGCGTTGCGCCTGGCCCGCCCCTCCTGAGACAGGACAC GCCCACTCGACCACAGGGCCTgcccccgtccccgccccccgcgcggcgcTCCATACTTGGCGATCGCTGCGGCCC	256	2	n	4.1e-07	++++++++++
chr4:139192504-139192999	301	CGCGCTCTCATTGGTCGGGAGCTGGCGGCTGGGGGGCGGGTCGGGCTGGCCGGGGCGGGGAAGGAAGGTGGTGGC	304	1	y	1.7e-06	+++++ ++++++++
chr4:139192504-139192999	301	CGCGCTCTCATTGGTCGGGAGCTGGCGGCTGGGGGGCGGGTCGGGCTGGCCGGGGCGGGGAAGGAAGGTGGTGGC	330	2	y	9.3e-07	++++++++++
chr4:139192504-139192999	301	CGCGCTCTCATTGGTCGGGAGCTGGCGGCTGGGGGGCGGGTCGGGCTGGCCGGGGCGGGGAAGGAAGGTGGTGGC	349	2	y	1.1e-05	+ ++++++++
chr4:139192504-139192999	376	TgcccggcgcgggggggtgggggggggaggggggcgcTGACCCGGATGTTCACTCTTGGGCACCCGGGGAAGTGG	386	2	y	2.5e-06	+++++++ +++
chr18:80151027-80152060	76	tccccgtcccctgtccccgcccttcccccccccccAGAACGGCCCCACTCCCACGTGACCCGCGAGCGGGCGCGG	91	2	n	8.5e-06	+++++++ ++
chr18:80151027-80152060	226	TGGGGACAGCGCAGCGGACAGCGCTAGGGACGTCGGGGCGGACCCAGGAGTGGACGGCGGGTGGGTCGCGGGGAG	280	2	y	9.5e-05	++ +++ +++
chr18:80151027-80152060	376	CAACACCGCCGCGTCCTCCGCCTACGCGGCGGGACCCCCGCCCCGCGCCCGTCCCTCCTCCCGCGCGCCAGAAAG	412	2	n	1.1e-05	++++++++ +
chr18:80151027-80152060	451	AGAAGATGGCGCTCAGCTGCCTCAGGAAGTGACGTCGCCTCATTTGCATGCCGACGAGGCCAGCCAATGGGTGTA	511	1	n	2.9e-05	++++++++ ++ +
chr18:80151027-80152060	601	TGGAGGGGGTGGGGCCTACCGCAGCCCCCTCCCCTGGACCCCCTGGGTCTAGAGCCTTCGCCCCCTCTGGGCAAG	603	2	y	1.9e-06	+++++++ +++
chr18:80151027-80152060	676	CTCTCGAGAGAGAGTTTAAGGAGGTGGTGACGTCATTGAAGGGGTGGGGCGAGGCCGTCATCGACCACATGACCA ATCACATGAGTCCACCAGAGCTCTGACTTCTTTTGCATGGAATGGGGGTGGAGCCAGTGGAAGCCAAGTGGGTGG	713	2	y	8.5e-06	++ ++++ +++
chr18:80151027-80152060	676	CTCTCGAGAGAGAGTTTAAGGAGGTGGTGACGTCATTGAAGGGGTGGGGCGAGGCCGTCATCGACCACATGACCA ATCACATGAGTCCACCAGAGCTCTGACTTCTTTTGCATGGAATGGGGGTGGAGCCAGTGGAAGCCAAGTGGGTGG	745	1	n	1.8e-05	++++++++++ + +
chr18:80151027-80152060	826	CCCCGCCCATACCTACAAGCCAATAAGAAGCCAGCCCTGAGGATACTGGCTTGCTATTGGAGGATAGGACTTAAA	827	2	n	2.2e-05	+++++++ +
chr18:80151027-80152060	826	CCCCGCCCATACCTACAAGCCAATAAGAAGCCAGCCCTGAGGATACTGGCTTGCTATTGGAGGATAGGACTTAAA	842	1	n	6.1e-06	+++++++ +++++
chr18:80151027-80152060	901	CTCTAGGAACTTGGACCAGTGTGCCTATGATTGACAGATCTTGGTGAGCCAACCGGATAGGATCTCCTGAGTCAT	928	3	y	1.1e-06	++++++++++
chr11:84179412-84179881	1	AGCTTCCACTCCGCTCTCTGCCGGGAGGTGGAGCCGTTGGGCCGGCCCCAAACCCGCCCAGACAGAAGGGGAACC	53	2	n	4.8e-05	+++++++ +
chr11:84179412-84179881	76	CACCACGTCCCAGACCCGCCCGCCCTCGCACCGCTCGGCCCCGAATGGCAGAGCCGCACTCGGACCATCGGCATC	94	2	n	4.7e-06	+++++++ + +
chr11:84179412-84179881	151	GCCTCACGTcgccccgccccgcgccgcgcgcccATTGGCTGACGCGGGCCCGAGCCCGCGCCTCGCCCCCTCCCA	163	2	n	1.1e-05	++++++++ +
chr11:84179412-84179881	151	GCCTCACGTcgccccgccccgcgccgcgcgcccATTGGCTGACGCGGGCCCGAGCCCGCGCCTCGCCCCCTCCCA	178	1	y	3.4e-06	++ ++ ++++++++
chr11:84179412-84179881	301	ACCTAATGGGGCTGGGCGGCTGAGGTgggcggccgggcgggggcgggccgggggcggggcAGTCCACCGAAGCCC CGCCCTCCTCGGCCCCGGTGCCGGGCCGGCCTGCTGAGCGCCTGTCAGCCATCGCCGAGCCGCCGGCGTCGCCTC CCGCCCAGCACATCTCGGC	319	2	y	7.4e-05	+ + ++ +++
chr11:84179412-84179881	301	ACCTAATGGGGCTGGGCGGCTGAGGTgggcggccgggcgggggcgggccgggggcggggcAGTCCACCGAAGCCC CGCCCTCCTCGGCCCCGGTGCCGGGCCGGCCTGCTGAGCGCCTGTCAGCCATCGCCGAGCCGCCGGCGTCGCCTC CCGCCCAGCACATCTCGGC	337	2	y	4.1e-07	+ +++++++++
chr11:84179412-84179881	301	ACCTAATGGGGCTGGGCGGCTGAGGTgggcggccgggcgggggcgggccgggggcggggcAGTCCACCGAAGCCC CGCCCTCCTCGGCCCCGGTGCCGGGCCGGCCTGCTGAGCGCCTGTCAGCCATCGCCGAGCCGCCGGCGTCGCCTC CCGCCCAGCACATCTCGGC	348	2	y	1.5e-06	+++++++++
chr11:84179412-84179881	301	ACCTAATGGGGCTGGGCGGCTGAGGTgggcggccgggcgggggcgggccgggggcggggcAGTCCACCGAAGCCC CGCCCTCCTCGGCCCCGGTGCCGGGCCGGCCTGCTGAGCGCCTGTCAGCCATCGCCGAGCCGCCGGCGTCGCCTC CCGCCCAGCACATCTCGGC	374	2	n	7.7e-06	+++++++ ++
chr11:84179412-84179881	301	ACCTAATGGGGCTGGGCGGCTGAGGTgggcggccgggcgggggcgggccgggggcggggcAGTCCACCGAAGCCC CGCCCTCCTCGGCCCCGGTGCCGGGCCGGCCTGCTGAGCGCCTGTCAGCCATCGCCGAGCCGCCGGCGTCGCCTC CCGCCCAGCACATCTCGGC	450	2	n	5.1e-05	+++++++ +
chr12:76710013-76710399	1	GCACAGTGGCCGCCGGGCGCCTGGTGCAGCGGAGCCGCGGACCCGCCCAGAGATATAAATAACATTATCTGAGGA	42	2	n	6.5e-05	+++++++
chr12:76710013-76710399	76	GGGACATTCCTGCCGGGGGACATCGCTGCTGCCGGGACCAGATAGTCCCGCGGCGGGGGCGGGGAGGCGGGGCTG	128	2	y	4.1e-07	+ +++++++++
chr12:76710013-76710399	151	CAGCCTCCCGCAGCGCCAGGCCCGCCTTCCCCACCCACTCCTGCACCTGCCAATCAGACTGCGCGCCCGGGGGCA	171	2	n	9.5e-06	++++++ +++
chr12:76710013-76710399	151	CAGCCTCCCGCAGCGCCAGGCCCGCCTTCCCCACCCACTCCTGCACCTGCCAATCAGACTGCGCGCCCGGGGGCA	197	3	n	6e-06	+++ ++++++
chr1:131910269-131910640	1	ACAGGGGGCGGGCAATCGGCGACCATTTTTGTTTTGCGGCCGTGCGCTCTCAGCGCATCTTGACTAACAGGACCC	2	2	y	2.6e-07	++++++++++
chr1:131910269-131910640	1	ACAGGGGGCGGGCAATCGGCGACCATTTTTGTTTTGCGGCCGTGCGCTCTCAGCGCATCTTGACTAACAGGACCC	61	3	y	6.6e-05	+++ + ++++
chr1:131910269-131910640	76	CATGGAGGAGGCGGGGCCTATCCGGGAGTGGGGCGGGGCTGGGAGGCGTGATGATTCAAATGGACTAATGACTAG	80	2	y	1.1e-06	++++ ++++++
chr1:131910269-131910640	76	CATGGAGGAGGCGGGGCCTATCCGGGAGTGGGGCGGGGCTGGGAGGCGTGATGATTCAAATGGACTAATGACTAG	102	2	y	1.5e-05	+ ++++++++
chr1:131910269-131910640	151	GGCGCATCTGACAGGAGTCACCAATGAGCGGGCGTGCTGGGGCGGAGCGCACAAACCCTACGGGGTTTGGTTGCA	168	1	n	3.1e-05	+ ++++++ ++ ++
chr15:82146919-82147425	151	GCTATGCAAATCTGAGCTGCTGATCGATGACGCACCATCACCCCATGAGCCGCTTCGCGCGCCGATTGGCTAATG	209	1	y	3.4e-07	++ +++++++++++
chr15:82146919-82147425	226	CAAGCCTGGTCCCATTGACAACAAACTTGGGGGTGCGGAGGCTCGGGGCGGGGCTGCAGTgggcgcggcccgggg cgggggAATTCTGCCCCGCCCCTTCCGTGGAGTCGGGGCGCAGCTCAAACATGGCGGCGGTTGGCACGGGGCGGT	267	2	y	2.4e-05	++++++++
chr15:82146919-82147425	226	CAAGCCTGGTCCCATTGACAACAAACTTGGGGGTGCGGAGGCTCGGGGCGGGGCTGCAGTgggcgcggcccgggg cgggggAATTCTGCCCCGCCCCTTCCGTGGAGTCGGGGCGCAGCTCAAACATGGCGGCGGTTGGCACGGGGCGGT	294	2	y	2e-05	++++++++
chr15:82146919-82147425	226	CAAGCCTGGTCCCATTGACAACAAACTTGGGGGTGCGGAGGCTCGGGGCGGGGCTGCAGTgggcgcggcccgggg cgggggAATTCTGCCCCGCCCCTTCCGTGGAGTCGGGGCGCAGCTCAAACATGGCGGCGGTTGGCACGGGGCGGT	315	2	n	9.3e-07	++++++++ ++
chr19:4755721-4756756	76	GCAGCTTGGGACGGATGCGGAACCCTTGTCACTCATTCCCCAAACCTGGATTCTCCCTGGACCTCTGGACAACGT	101	3	n	6e-05	+++++ +++
chr19:4755721-4756756	301	ATTATCTTTCTACTCCACTCTCAGTCTCAGCTTCTTCACCAATGAACAACACTATTGCAGTGAAAATTAAATTGT	336	1	n	9.4e-05	+ ++++++ + +
chr19:4755721-4756756	601	CAAGGCAATGGTTGCTTCCTGAGCCCCCTTGACGCGCAAGCCGCGACCCACTCCCAAGGCGGTGATTGGCTAGCC	659	1	y	8.2e-07	++ ++++++++++
chr19:4755721-4756756	676	CGGGCTGGGGGCGGGCTGACCTTCGCTCCGCAGTGCCGTCACCACATGACCCCGCCCCCGCACGGGGGGCGGACA	680	2	y	1.9e-06	+++++++++
chr19:4755721-4756756	676	CGGGCTGGGGGCGGGCTGACCTTCGCTCCGCAGTGCCGTCACCACATGACCCCGCCCCCGCACGGGGGGCGGACA	726	2	n	4.1e-07	+++++++++ +
chr15:81190739-81191143	1	AGCTGCGGGCCCTCCCACCACTCCGGGTCCCGCCTCCGCACCCTCCCCCCTACCCGCCTGGGAGCGACAGCCGTA	29	2	n	3.3e-06	++++++ ++ +
chr15:81190739-81191143	76	TCGACCAATCAGAAACCTAGCGCCGTTAGGGCTAGCCCGATTTAGGGGGCGTTCGCCGAAGGAAGAGGAACGAGG	77	1	n	2.3e-06	+++++++++++++
chr15:81190739-81191143	151	GAGGCTAGTACGGCGGCGCGACTTCTGTGACTGACATCATAGCGCAGCCAATCGGTAACTGAGAGATGACTTCAT	178	3	y	3e-05	+++ +++++
chr15:81190739-81191143	151	GAGGCTAGTACGGCGGCGCGACTTCTGTGACTGACATCATAGCGCAGCCAATCGGTAACTGAGAGATGACTTCAT	195	1	n	1.4e-05	+++++++++++ +
chr15:81190739-81191143	226	CGCTGAAGGAAGTCTGGAACTGGCGGAGCGGCCGCCAAGAGGTGGGAGGAGGTCGGCGATGAGCCGGGGGGCGGA	261	2	y	3.9e-05	+ + ++ +++
chr7:16842848-16843066	1	TTCCCCTTCCGTCCCAGTAAGGCCCGCCCTGTGATGTCACGGTGCCCTGCTTTGATTGGCCAGCTGTGCCATCGC	23	2	n	3.2e-05	+++++++ +
chr7:16842848-16843066	1	TTCCCCTTCCGTCCCAGTAAGGCCCGCCCTGTGATGTCACGGTGCCCTGCTTTGATTGGCCAGCTGTGCCATCGC	49	1	y	3.4e-07	+++ ++++++++++
chr7:16842848-16843066	151	CGACCCTCCCTTGTCCCCGACCCGCCCCGCCTTCGGTAACGCTCCCTCCTCCGCCGCCCCTGATCCAA	171	2	n	6.1e-06	++++++++ ++
chr4:41464820-41465301	1	TTAGGTGTCCGCCAGGCCACATCCCCATGGCAACGCCACAAGCGCCAGTTCGAAcgcgcgcgccgacgcccgccc gcccgcggTCCCGCAGCACCGACCAATGGTCATTCACAGAGCCTGTCACCTCTCCTCTAAAAGGCCAATCAGAAA	69	2	n	3e-05	+++++++ +++
chr4:41464820-41465301	1	TTAGGTGTCCGCCAGGCCACATCCCCATGGCAACGCCACAAGCGCCAGTTCGAAcgcgcgcgccgacgcccgccc gcccgcggTCCCGCAGCACCGACCAATGGTCATTCACAGAGCCTGTCACCTCTCCTCTAAAAGGCCAATCAGAAA	137	1	n	3e-06	++++++++++++
chr4:41464820-41465301	226	AAAACCACGCCTCAGGGGCGGGTGGAAGCGCCTGATGCCCAATTCTGTGGCTCGTCTGAAGTGCAGCCGGGCTCT TCTGATTGGCTGGCGCGCTACGTCTCCGTTCGAGGACCGCCTCCTGCCTCTGGGCTACGGGTGAGTGCTGTGGGG	237	2	y	9.5e-06	++++++++
chr4:41464820-41465301	226	AAAACCACGCCTCAGGGGCGGGTGGAAGCGCCTGATGCCCAATTCTGTGGCTCGTCTGAAGTGCAGCCGGGCTCT TCTGATTGGCTGGCGCGCTACGTCTCCGTTCGAGGACCGCCTCCTGCCTCTGGGCTACGGGTGAGTGCTGTGGGG	299	1	y	1e-07	++++++++++++++
chr4:41464820-41465301	376	CTGGGGGGCGTGGGGAGTGTCGCGGGCTCCTGACCTGTTGCTGCGGGGACGGAGCTGGCAGTGAGGCGCGTGTAG	377	2	y	6.5e-05	++++++++ +
chr16:42875126-42876005	76	CGCAGTCCCCGCGACAATTGGCCCCGGGCCGCCGCCCGTCATCCTCTAGCCCCTCTTGGAGTCCCGCCTCTATCC	138	2	n	3.4e-05	++++++ +
chr16:42875126-42876005	151	TCGGGTCATTTAAGTTTATCACAAATAAATAAATAAAGGAGGAAATAGAAATGCGTAGAAAGTAAAAGCAGTCAG	174	4	n	8.7e-05	++++++ ++
chr16:42875126-42876005	226	GAGGGGGCGGGGACGTGGATGAAAAGGAGGGTGGGGAAGTGGAGGAGTAAACAACCAAACTTGATCGTGCCTATA	226	2	y	9.2e-08	+++++++++++
chr16:42875126-42876005	226	GAGGGGGCGGGGACGTGGATGAAAAGGAGGGTGGGGAAGTGGAGGAGTAAACAACCAAACTTGATCGTGCCTATA	250	2	y	3.2e-05	++ +++ +++
chr16:42875126-42876005	301	CTGACCAATCACCGATCACTACAGTCCGGTCTGACGGCCTCTGTCGACCAATAGTTTCCCAGCTCTTGGATCACT	302	1	n	1.4e-05	++++++++++ +
chr16:42875126-42876005	376	GAATAACCAGAGACAGCTGGCCTCTCTACACAGGGCGCTGGTGGGCGGGAAGAGTTGAGAACATTGACCAATAGA	414	2	y	8.5e-06	++ +++++++
chr16:42875126-42876005	451	CTGTTAAAACTGCTCTGAGTGAAGTTTCCGCTCACCAGTTGATGCTTGAGATAGCGGATTGGGTGTCTCCTAGGC CAATCAAAGATGACAGAGATGAGAGAAGGGGCAGTTAGGGGAGGAGCCGCGGAGGGGAGGAGGAAGAGTGCATTT	522	1	n	8.3e-06	+++++++++ ++
chr16:42875126-42876005	676	GCCCAATAGTAGGACAAGGTAGAGGTTCGCGGCTTCGGGCGCCCAATGTGGGCCTTCTGCCGAAGAAGTAGGGGC GGGGGGAAGTTTAGGAGTTGAGGAAAGAAGATTAAAGAGCGCGAGGAGGTAACGCCAAAAACTCTAATTTGTTGT GGGGCGGGCGGGAGGGAGGGGTGTGTGCGTGCGGAGCGCGGCCGGGCGTCTACG	743	2	y	3.8e-06	+ ++++++++
chr16:42875126-42876005	676	GCCCAATAGTAGGACAAGGTAGAGGTTCGCGGCTTCGGGCGCCCAATGTGGGCCTTCTGCCGAAGAAGTAGGGGC GGGGGGAAGTTTAGGAGTTGAGGAAAGAAGATTAAAGAGCGCGAGGAGGTAACGCCAAAAACTCTAATTTGTTGT GGGGCGGGCGGGAGGGAGGGGTGTGTGCGTGCGGAGCGCGGCCGGGCGTCTACG	823	2	y	1.4e-05	+ ++++++++
chr4:149166579-149166974	76	GCAAGTACAGTGAAGTCCGGCTCCCGGCGCCTCGAGAGGCTTACAGAGACGCTGGCCAATCAGAAGACAGGGGTG GGCCGATGCCCCACGCTATTGGGTCTCTGCGGCGCCTGTTATACCACCTGAGGGCAAACGGACCCGCCCACCCCC	128	1	n	1.6e-07	++++++++++++++
chr4:149166579-149166974	76	GCAAGTACAGTGAAGTCCGGCTCCCGGCGCCTCGAGAGGCTTACAGAGACGCTGGCCAATCAGAAGACAGGGGTG GGCCGATGCCCCACGCTATTGGGTCTCTGCGGCGCCTGTTATACCACCTGAGGGCAAACGGACCCGCCCACCCCC	142	2	y	3.9e-05	++++ +++
chr4:149166579-149166974	76	GCAAGTACAGTGAAGTCCGGCTCCCGGCGCCTCGAGAGGCTTACAGAGACGCTGGCCAATCAGAAGACAGGGGTG GGCCGATGCCCCACGCTATTGGGTCTCTGCGGCGCCTGTTATACCACCTGAGGGCAAACGGACCCGCCCACCCCC	213	2	n	2.5e-06	+++++++ +++
chr19:6067196-6068103	676	ACCCTGGGCCCAGCACAGTAGCCAATCAGCGCTGGGAGGCGGGCCCCATGCTGGCGCCTCAGAAGCTTCGGCACT	694	1	n	6.1e-08	+++++++++++ ++
chr19:6067196-6068103	676	ACCCTGGGCCCAGCACAGTAGCCAATCAGCGCTGGGAGGCGGGCCCCATGCTGGCGCCTCAGAAGCTTCGGCACT	708	2	y	5.3e-06	+++ ++++++
chr19:6067196-6068103	751	GAAACCCAACCCGGGCGGGTCCCGCCCCTGCAGGCAAGAGGAAGGAGGAGGACACATAAGTTTATTAGAAGGATC	771	2	n	2.8e-06	++++++++ +
chr5:136116532-136116880	76	GGTCATCCGAGCCGCTAGGGGGCGGGGGCCAGGTGCTTACACTGATTGGCTGCGGCTGAGAAATCCGGAAGTGGT	91	2	y	5.2e-07	++++++++++
chr5:136116532-136116880	76	GGTCATCCGAGCCGCTAGGGGGCGGGGGCCAGGTGCTTACACTGATTGGCTGCGGCTGAGAAATCCGGAAGTGGT	114	1	y	5.4e-06	+ +++++++++++
chr5:136116532-136116880	226	CGCTCCTCCGGCCTTCGAGTCGTTCTTGCTCTTCGAGGGCGAGAAGAAGTAAGTGGAGGCCGGCGGAGGCGGGGA	288	2	y	3.3e-06	+ ++ ++++++
chr1:53785012-53785518	226	GCCCAAGAGCCAATCGGAGCGATTACGGAGGGTGGGGTTGTCACGTgggggcggggcggggcggcggccggcAGC	232	1	n	5.9e-07	+++++++++++++
chr1:53785012-53785518	226	GCCCAAGAGCCAATCGGAGCGATTACGGAGGGTGGGGTTGTCACGTgggggcggggcggggcggcggccggcAGC	251	2	y	2.4e-05	++ +++ +++
chr1:53785012-53785518	226	GCCCAAGAGCCAATCGGAGCGATTACGGAGGGTGGGGTTGTCACGTgggggcggggcggggcggcggccggcAGC	270	2	y	7.3e-07	+ +++++++++
chr1:53785012-53785518	301	GCGTGCTGTGAGGCCGGGCCTCAGGAGGGGGGCGGGGAGTGGGCGGAGCGCCGAGCGCCTGAAGACTTGGTTGCT	326	2	y	1.1e-06	++++++++++
chr19:4231700-4232104	1	GGACCAATGAGAAACCCGAGGAGGTGGTGAAGTCTGGGGCATCTTGACAGGTTCTTGGTTCCGCCTAACCCCTCC	1	1	n	1.8e-05	+++++++ ++++
chr19:4231700-4232104	76	TCACTCGAAACGCAGCAGCAGCTACCCCGCCCCCCGTCTTCTGCCGATTGCCATTGGCTAGAATTAAGGTCCCGC CCCGCAAAGGCCGTTTGCCATTTGCTTAGGTCTCTGATGTTTGCGTGCTTGTGGGGGCGGAAGACAGGCGTCATT	101	2	n	4.1e-07	++++++++++
chr19:4231700-4232104	76	TCACTCGAAACGCAGCAGCAGCTACCCCGCCCCCCGTCTTCTGCCGATTGCCATTGGCTAGAATTAAGGTCCCGC CCCGCAAAGGCCGTTTGCCATTTGCTTAGGTCTCTGATGTTTGCGTGCTTGTGGGGGCGGAAGACAGGCGTCATT	122	1	y	1.1e-05	++ + ++++++++
chr19:4231700-4232104	76	TCACTCGAAACGCAGCAGCAGCTACCCCGCCCCCCGTCTTCTGCCGATTGCCATTGGCTAGAATTAAGGTCCCGC CCCGCAAAGGCCGTTTGCCATTTGCTTAGGTCTCTGATGTTTGCGTGCTTGTGGGGGCGGAAGACAGGCGTCATT	146	2	n	1.5e-05	++++++++ +
chr19:4231700-4232104	301	GGCCCCCTCTCTCACTCTCAGCAGCTGTCTCTCACAGGCCCGCTGCCCTGCCTTTTCTTTGCCTCCTGCTCCGCC	325	3	n	6e-05	+++++ +++
chr17:34603679-34604466	1	ACGATTGATCCAAAGAGTGGGGGCGGAAAAAGGTGTGTGTGGGGCCCCTACCCTTGCACGATGATGATTGGCTGA	61	1	y	2.5e-05	+ ++++++++++
chr17:34603679-34604466	76	TAGGGCTTCAGTAACTATGCACTGCCGAGGGATTGGTCATAATGAGCTAGGCCTGTGTTGTCACTCAGCTAAAGA	133	3	n	6e-05	+++++ +++
chr17:34603679-34604466	151	GGCTTTGATTCGTCAGTTCAGCTGCCAGTCATAACCAAAGCTCAGAAGGGATTGGCTCAGGCCTACAGAACTCGC	172	3	n	2.4e-05	+++ ++ +++
chr17:34603679-34604466	226	CCACCATAAGCCTCTTTTTTTCCTTCTCTTCCTCTTTCTTAGAAGGTCCGGGTTCCTATTGGACTTTAGAGCGAA	277	1	y	6.2e-05	+++++ +++++ +
chr17:34603679-34604466	301	TGGTTCCAAATCAAATGATTGGCTGGCATGACACGGAAGAATGAGCATGCGCAATAAGCGGGGGGGGGGGGCGTG	312	1	y	8.5e-05	+ ++++++++++
chr17:34603679-34604466	301	TGGTTCCAAATCAAATGATTGGCTGGCATGACACGGAAGAATGAGCATGCGCAATAAGCGGGGGGGGGGGGCGTG	365	2	y	3.9e-05	+++++++++ +
chr17:34603679-34604466	376	GAATAGGCCAACCCAGACGAAGGCGGTGTCGACTCCAGTCCCGCCCCTTCACTCGCTCTCTCTCGTCACCATGGC	415	2	n	9.3e-07	++++++++ ++
chr17:34603679-34604466	526	CTCTCCGCTTGATTGGGCGGTTTACTCCGCCGCTGATTGGCCGAGATCTGGAGAGACGGTGCAGAGCTAAGGGGG	555	1	y	1.5e-06	++ +++++++++++
chr5:109690786-109691151	76	AAAAACCCGCCTTCCTTTTGATTTGCAGGTCCGCCGAGAGACTCTGATTGGCCAACAAGTCTTGAGTGACTGGAG	81	2	n	2.4e-05	++++++ ++
chr5:109690786-109691151	76	AAAAACCCGCCTTCCTTTTGATTTGCAGGTCCGCCGAGAGACTCTGATTGGCCAACAAGTCTTGAGTGACTGGAG	94	3	y	7e-05	+++++ +++
chr5:109690786-109691151	76	AAAAACCCGCCTTCCTTTTGATTTGCAGGTCCGCCGAGAGACTCTGATTGGCCAACAAGTCTTGAGTGACTGGAG	116	1	y	2.8e-07	+++++++++++++
chr5:109690786-109691151	76	AAAAACCCGCCTTCCTTTTGATTTGCAGGTCCGCCGAGAGACTCTGATTGGCCAACAAGTCTTGAGTGACTGGAG	138	3	y	7.8e-05	+++ ++++ +
chr10:81432982-81433302	1	TATGCTCTGCGGACGAGCCCCTCCCACAGCCTGTCACTTGGGGGCGTGACCAAATTCCTCAGAATAGTGTATTGG	38	2	y	9.1e-05	+++++++ +
chr10:81432982-81433302	76	CTGAGGGCCTTCTGACAAGGCTTCTGATTGGTCAGAGTGCAGCTCCAGCGTGTCTGATTGGCCGTTGCTGGCAGC	96	1	y	5.9e-07	++++++++++++++
chr10:81432982-81433302	76	CTGAGGGCCTTCTGACAAGGCTTCTGATTGGTCAGAGTGCAGCTCCAGCGTGTCTGATTGGCCGTTGCTGGCAGC	126	1	y	4.3e-05	++++++++++++
chr10:81432982-81433302	226	GGGATTCACTCTTTTGGTCTCCGAGCCTCCCTAGGCGGGAGCTCGGGCGCACTTTGCGCTGTGGGTGGGAAGGGG	254	2	y	9.8e-05	++++++
chr10:81432982-81433302	226	GGGATTCACTCTTTTGGTCTCCGAGCCTCCCTAGGCGGGAGCTCGGGCGCACTTTGCGCTGTGGGTGGGAAGGGG	284	2	y	4.8e-05	+ +++ +++
chr19:42090187-42090583	1	GGAAGCTGGGGCGGGCTAAGGGCAGAGGGCGTACCTAACCCGGGTTTGTCTCGAGCATGCGCGGTCTCCACAGAA	5	2	y	1e-05	+ ++++++++
chr19:42090187-42090583	76	GGTGACGCGAAAGCTAAGGAGGCCGCGATTGCGTAGGCGCAGGTTCTGATTGGCCACTACACAAGCGCGAGGGGC	118	1	y	5e-08	++++++++++++++
chr19:42090187-42090583	226	GCGGGAGGTGGGGGAGTGCCGCGGATTGGTCACGGCCGCGAGCTCGCTGGTGTGGAGCGCGCCGGGTCCCCGAGC	227	2	y	2e-05	+++ ++ +++
chr19:42090187-42090583	226	GCGGGAGGTGGGGGAGTGCCGCGGATTGGTCACGGCCGCGAGCTCGCTGGTGTGGAGCGCGCCGGGTCCCCGAGC	244	1	y	6.2e-05	++ + +++++++++
chr10:95940485-95940897	1	GGCACCCAAGGTCCAAGCTCTCGGCGGAAGAAGCCAAGGCACCAGCTTCCTGTGGCCTGTCTCTCACACTAGCCC	57	3	n	6e-05	+++++ +++
chr10:95940485-95940897	76	CGCTTCCGATTGGTCGAAGCCTCGGGCCGGCCCTCCCTCCGGCCCCGCCCTCCCCGCGGATGGACAGGCCGAGGA GGCGGGGCTGCAGCGGCTccgcccctcggccccgggcgggcgggcccgcccAGCTGTCAGTTACGGGGGCGGCCC GGCAGGCGGGCGCTCGCTGGCTCCCTCCTCGCTGGCTCGTGCTCGTGAGCCTCTCGCCGCCTGTGGGGAAGTCGG	78	1	y	3.8e-06	++++++++++++++
chr10:95940485-95940897	76	CGCTTCCGATTGGTCGAAGCCTCGGGCCGGCCCTCCCTCCGGCCCCGCCCTCCCCGCGGATGGACAGGCCGAGGA GGCGGGGCTGCAGCGGCTccgcccctcggccccgggcgggcgggcccgcccAGCTGTCAGTTACGGGGGCGGCCC GGCAGGCGGGCGCTCGCTGGCTCCCTCCTCGCTGGCTCGTGCTCGTGAGCCTCTCGCCGCCTGTGGGGAAGTCGG	119	2	n	1.9e-06	+++++++ +++
chr10:95940485-95940897	76	CGCTTCCGATTGGTCGAAGCCTCGGGCCGGCCCTCCCTCCGGCCCCGCCCTCCCCGCGGATGGACAGGCCGAGGA GGCGGGGCTGCAGCGGCTccgcccctcggccccgggcgggcgggcccgcccAGCTGTCAGTTACGGGGGCGGCCC GGCAGGCGGGCGCTCGCTGGCTCCCTCCTCGCTGGCTCGTGCTCGTGAGCCTCTCGCCGCCTGTGGGGAAGTCGG	146	2	y	1.1e-06	++++ ++++++
chr10:95940485-95940897	76	CGCTTCCGATTGGTCGAAGCCTCGGGCCGGCCCTCCCTCCGGCCCCGCCCTCCCCGCGGATGGACAGGCCGAGGA GGCGGGGCTGCAGCGGCTccgcccctcggccccgggcgggcgggcccgcccAGCTGTCAGTTACGGGGGCGGCCC GGCAGGCGGGCGCTCGCTGGCTCCCTCCTCGCTGGCTCGTGCTCGTGAGCCTCTCGCCGCCTGTGGGGAAGTCGG	184	2	y	3e-05	+++ +++++++
chr10:95940485-95940897	76	CGCTTCCGATTGGTCGAAGCCTCGGGCCGGCCCTCCCTCCGGCCCCGCCCTCCCCGCGGATGGACAGGCCGAGGA GGCGGGGCTGCAGCGGCTccgcccctcggccccgggcgggcgggcccgcccAGCTGTCAGTTACGGGGGCGGCCC GGCAGGCGGGCGCTCGCTGGCTCCCTCCTCGCTGGCTCGTGCTCGTGAGCCTCTCGCCGCCTGTGGGGAAGTCGG	195	2	n	5.4e-05	+++++++ +
chr10:95940485-95940897	76	CGCTTCCGATTGGTCGAAGCCTCGGGCCGGCCCTCCCTCCGGCCCCGCCCTCCCCGCGGATGGACAGGCCGAGGA GGCGGGGCTGCAGCGGCTccgcccctcggccccgggcgggcgggcccgcccAGCTGTCAGTTACGGGGGCGGCCC GGCAGGCGGGCGCTCGCTGGCTCCCTCCTCGCTGGCTCGTGCTCGTGAGCCTCTCGCCGCCTGTGGGGAAGTCGG	225	2	y	8.1e-05	++ ++++++
chr10:95940485-95940897	301	GGCCGCCAAAGCCGCGTCCACCGCCGCCTCTTCCCCGCCCTCCTCCCTCCCGGCTCGGCTGCCGGCCCCTCGCGC	334	2	n	7.7e-06	+++++++ ++
chr7:19345015-19345574	226	ACAGGGTGGAGGTGGATGGAGGCCGGGGATTGATGATTGGCAGCGGAAGAAGCCAATCATTGCGGAGGCTGAGAC	259	3	y	6e-06	++++++ +++
chr7:19345015-19345574	226	ACAGGGTGGAGGTGGATGGAGGCCGGGGATTGATGATTGGCAGCGGAAGAAGCCAATCATTGCGGAGGCTGAGAC	275	1	n	3.8e-05	+++++++++ ++
chr7:19345015-19345574	301	TAGGCCGGGACTGGGCGAGGCGAAAGCATCCAGGTGTGCCCCTGGGGGCGGGGCCAATTGCCTCTGAGCGAGTGT	342	2	y	1.9e-06	+++++++++
chr7:19345015-19345574	376	CGTGCGGGAGTAATAGCAGGTAGGCGGGGCTATAAGACCCGTAGACCAATCCGGAGTGAGAAGGAGGAAAGGGGC GGGCCCACTGGTTGGTCCTCTGGAACCTAACGCTAGCGAACCGGGCAACCTTTTGTGGGATGGGGTGGGGATACC	393	2	y	2.8e-05	++ ++++++
chr7:19345015-19345574	376	CGTGCGGGAGTAATAGCAGGTAGGCGGGGCTATAAGACCCGTAGACCAATCCGGAGTGAGAAGGAGGAAAGGGGC GGGCCCACTGGTTGGTCCTCTGGAACCTAACGCTAGCGAACCGGGCAACCTTTTGTGGGATGGGGTGGGGATACC	443	2	y	3.8e-06	+ ++++++++
chr7:19345015-19345574	376	CGTGCGGGAGTAATAGCAGGTAGGCGGGGCTATAAGACCCGTAGACCAATCCGGAGTGAGAAGGAGGAAAGGGGC GGGCCCACTGGTTGGTCCTCTGGAACCTAACGCTAGCGAACCGGGCAACCTTTTGTGGGATGGGGTGGGGATACC	509	2	y	2.2e-05	++ ++++ +++
chrX:73082497-73082675	1	AAAGCCCCTTCTTGGTTAGGCCCTGCCTTCCGGCGCATATGCCTCTCTGATTGGCTGGGACAGTGCGCATGCCCT	44	1	y	1.2e-07	+++++++++++++
chr7:12977782-12978431	1	TTCCGGGAGCGCTAGCTCTGATTGGTCAGGATGCCTCTCTGGCCAATAGAAACCAGGTCCGTTGCGCACATGCGT	15	1	y	1.2e-07	++++++++++++++
chr7:12977782-12978431	1	TTCCGGGAGCGCTAGCTCTGATTGGTCAGGATGCCTCTCTGGCCAATAGAAACCAGGTCCGTTGCGCACATGCGT	40	1	n	1.4e-05	++++++++ + +++
chr7:12977782-12978431	301	GGCGGAGCAGATGCAGGATTGGCCGGGCTGGTAGGGCAACGCGCGAGGCGGGGCGTTCTCTGAGTGGCAGTGGGA	342	2	y	3.2e-05	+ + ++++++
chr7:12977782-12978431	301	GGCGGAGCAGATGCAGGATTGGCCGGGCTGGTAGGGCAACGCGCGAGGCGGGGCGTTCTCTGAGTGGCAGTGGGA	361	3	y	2.4e-05	+++ ++ +++
chr7:12977782-12978431	451	AGCTGGGCGGGCGCAGCTTCATAATCCGGCTCCTCGGATCACCGAGAGCACCTCCCAGCCGTCGGACCCACCCCT TTCCTGTGTCAGAGCCTGACACCCCAACTCTTGAGTTTCTCCAGAGCAGGACGGATGTCCCAAGAGAGCCGATTT	451	2	y	5.4e-05	+ +++++++
chr7:12977782-12978431	451	AGCTGGGCGGGCGCAGCTTCATAATCCGGCTCCTCGGATCACCGAGAGCACCTCCCAGCCGTCGGACCCACCCCT TTCCTGTGTCAGAGCCTGACACCCCAACTCTTGAGTTTCTCCAGAGCAGGACGGATGTCCCAAGAGAGCCGATTT	517	2	n	2.2e-05	+++ ++++ +
chr7:127273971-127274279	76	AGCCACGCTGCCTGTCGGAGCGCCGCGCGGcctctatttatatacagcgtgattgacagctgctctatccaatga cgattcccgtaccgagaggcgggcttcctttactcaaaaaggtgtattacaaattaacCGTCTGCTTGCACAACC	125	3	y	1.1e-06	++++++++++
chr7:127273971-127274279	76	AGCCACGCTGCCTGTCGGAGCGCCGCGCGGcctctatttatatacagcgtgattgacagctgctctatccaatga cgattcccgtaccgagaggcgggcttcctttactcaaaaaggtgtattacaaattaacCGTCTGCTTGCACAACC	141	1	n	6.2e-05	++ +++++ + +
chr7:127273971-127274279	76	AGCCACGCTGCCTGTCGGAGCGCCGCGCGGcctctatttatatacagcgtgattgacagctgctctatccaatga cgattcccgtaccgagaggcgggcttcctttactcaaaaaggtgtattacaaattaacCGTCTGCTTGCACAACC	163	2	y	1.3e-05	+ + ++++++
chr16:3847068-3847412	1	CGAACGCTCCGGGACTAGCCACTGAACTACGACTCCCAAGAGGCACTGCGACTGATTGATAAATCAAACAGCCAA TAAAAGATTAGCAGTGTCCTGGAGACCCAGTCCTGTAGAGGAGAGGCGGGCCTTCCCGTGGGTAGCTCTTGGAGC	69	1	n	9.2e-06	++++++++ + ++
chr16:3847068-3847412	1	CGAACGCTCCGGGACTAGCCACTGAACTACGACTCCCAAGAGGCACTGCGACTGATTGATAAATCAAACAGCCAA TAAAAGATTAGCAGTGTCCTGGAGACCCAGTCCTGTAGAGGAGAGGCGGGCCTTCCCGTGGGTAGCTCTTGGAGC	115	2	y	6.8e-06	++ + ++++++
chr17:63863769-63864083	1	CAACTCCAGCCTCCGCCCACTCGCTGAGCTCCGCCCCTCGCGGGTCCGAGCCAATGGGCCGCGCCCGCCTCCTGG	64	2	n	2.5e-06	++++++ +++
chr17:63863769-63864083	76	GAGGTTGTAGAAGAGGGGGTTGGGGCCGGTGGCAGCGCCCGCCCCTTGCTCCTTCTCATTGGCTAAACTCTCGGG	113	2	n	2.1e-06	++++++++ +
chr17:63863769-63864083	76	GAGGTTGTAGAAGAGGGGGTTGGGGCCGGTGGCAGCGCCCGCCCCTTGCTCCTTCTCATTGGCTAAACTCTCGGG	127	1	y	2.8e-07	+++++ ++++++++
chr17:63863769-63864083	151	GTGCCCGGAGACCGGAGTGTAGCGGGATTGGCTGTCGAGCCTCGCAACGGTGGCGCCTATTGGCTGGAGCAGTCC	203	1	y	7.5e-06	++ ++ ++++++++
chr14:63177863-63178299	1	GAGGAGGCGGGGCCAGCGCCGGACGTCCCGCCCACCTCCCGCCCTCCTCAACCGGCCGCGCCGCTCGCGCCTCCA	1	2	y	1.1e-06	++++ ++++++
chr14:63177863-63178299	1	GAGGAGGCGGGGCCAGCGCCGGACGTCCCGCCCACCTCCCGCCCTCCTCAACCGGCCGCGCCGCTCGCGCCTCCA	27	2	n	9.5e-06	+++++++ ++
chr14:63177863-63178299	1	GAGGAGGCGGGGCCAGCGCCGGACGTCCCGCCCACCTCCCGCCCTCCTCAACCGGCCGCGCCGCTCGCGCCTCCA	38	2	n	7.7e-06	+++++++ ++
chr14:63177863-63178299	76	GGCTAGGACGCGCGGAGTGGACTGACGGACGTTGATTGGCCAGAGCTGCTCGCACCAGGAAAACGTTAACCAATC GGAAGCCGGAGGAGCCTGGCGCGATGACCACACCCTAGAATTTGATTGGAGAGCTGGAAAGCAGCCAGCGAACAC	104	1	y	7.5e-06	+ ++++++++++
chr14:63177863-63178299	76	GGCTAGGACGCGCGGAGTGGACTGACGGACGTTGATTGGCCAGAGCTGCTCGCACCAGGAAAACGTTAACCAATC GGAAGCCGGAGGAGCCTGGCGCGATGACCACACCCTAGAATTTGATTGGAGAGCTGGAAAGCAGCCAGCGAACAC	142	1	n	6.8e-07	++++++++++++++
chr6:47813278-47813886	76	GCCGACCTCCCGAGCGACGCCGGAGCGCACCAAAGCCTCCAGGAAGTTCAGGCCGGTGATTGGTTGGAGGTAAGG	128	1	y	7.5e-06	++ ++++++++++
chr6:47813278-47813886	151	AAGCCGCGGCCCGTCCAATCCCCGCACGAATCAGGGCGAGAGCCGTGGCGCCCCGCCTACACCGCCCCGCCCCGC TGCCTGAGCCCTCCGCGCGGGCGCGCCCCTCAGCTCCGCGTTTAAAACTCCGAGCCCTAGTGTGAGGTGCCCCCT TCTGATTGGCTGTGCCGCGACCACCAATCACGGGCTGCCACTCGGTTTGCTTGGAGCGCCCAGGTCCGGAAAGAG	202	2	n	2.4e-05	++++++ + +
chr6:47813278-47813886	151	AAGCCGCGGCCCGTCCAATCCCCGCACGAATCAGGGCGAGAGCCGTGGCGCCCCGCCTACACCGCCCCGCCCCGC TGCCTGAGCCCTCCGCGCGGGCGCGCCCCTCAGCTCCGCGTTTAAAACTCCGAGCCCTAGTGTGAGGTGCCCCCT TCTGATTGGCTGTGCCGCGACCACCAATCACGGGCTGCCACTCGGTTTGCTTGGAGCGCCCAGGTCCGGAAAGAG	216	2	n	1.7e-05	++++++++ +
chr6:47813278-47813886	151	AAGCCGCGGCCCGTCCAATCCCCGCACGAATCAGGGCGAGAGCCGTGGCGCCCCGCCTACACCGCCCCGCCCCGC TGCCTGAGCCCTCCGCGCGGGCGCGCCCCTCAGCTCCGCGTTTAAAACTCCGAGCCCTAGTGTGAGGTGCCCCCT TCTGATTGGCTGTGCCGCGACCACCAATCACGGGCTGCCACTCGGTTTGCTTGGAGCGCCCAGGTCCGGAAAGAG	299	1	y	1e-07	++++++++++++++
chr6:47813278-47813886	151	AAGCCGCGGCCCGTCCAATCCCCGCACGAATCAGGGCGAGAGCCGTGGCGCCCCGCCTACACCGCCCCGCCCCGC TGCCTGAGCCCTCCGCGCGGGCGCGCCCCTCAGCTCCGCGTTTAAAACTCCGAGCCCTAGTGTGAGGTGCCCCCT TCTGATTGGCTGTGCCGCGACCACCAATCACGGGCTGCCACTCGGTTTGCTTGGAGCGCCCAGGTCCGGAAAGAG	321	1	n	5.5e-05	+ ++++++++ ++
chr6:47813278-47813886	376	TGCGGGGGAGAACAAAGGCAACCAGCCCTGCACAGGGAGGCGGGGCTTGAGCACTCCGAGGGGAGGGATTGGTTG	409	2	y	6.1e-06	+++ ++++++
chr9:113930699-113931260	76	AAAAGCCGACGAAAGGGTATTTCCCAGAACCGACGGAAGTAGGACCTGGAACCACTTCCTCCAGTGCGGGCCAAT GAGCTCTTACTTATGGCAGTCAATTTAGTCCCGGAGGGGAAGAGCGTTTTGATTGGTGGCTCAGCCGGGAACGCA	143	1	n	3.8e-05	+++++++ ++ +
chr9:113930699-113931260	76	AAAAGCCGACGAAAGGGTATTTCCCAGAACCGACGGAAGTAGGACCTGGAACCACTTCCTCCAGTGCGGGCCAAT GAGCTCTTACTTATGGCAGTCAATTTAGTCCCGGAGGGGAAGAGCGTTTTGATTGGTGGCTCAGCCGGGAACGCA	196	1	y	1.9e-05	+++ ++++++++ +
chr9:113930699-113931260	226	GAGGCTCACGGGAATCCATTCCGGCCGCTTCGCCGTGACTGCCCAGAAGACCTGTCAGTCAGCCGAGCGTAACCG	277	3	n	2.9e-06	++++++ +++
chr9:113930699-113931260	376	CCgcgaggcgcggggccgcgaggggcgggcctgggaggggagcggccgcaggggcggggccggaggaggaggcgg	394	2	y	2.8e-06	+ ++++++++
chr9:113930699-113931260	376	CCgcgaggcgcggggccgcgaggggcgggcctgggaggggagcggccgcaggggcggggccggaggaggaggcgg	423	2	y	2.8e-06	+ ++++++++
chr9:113930699-113931260	526	ccggggcgaaggggcgctggagcctgggcgggcggg	551	2	y	3e-05	+++ +++++++
chr19:44284164-44284496	1	CCCGCTCTGCCTCCCTGCAGTGGGCGGGCCTGGGGGCCCAGACGCCTAGAGAGACCTGGGGAAAGGAGGCCCCTC	18	2	y	4.7e-06	++ +++++++
chr19:44284164-44284496	151	CAGCCAATCAGCAGCCGCGCTGCGGCTCTGCCGGCACCCGCTCCAATCAGGAGGCGCCGCCCCTGCAGTCTAGCT	151	1	n	8.2e-07	+++++++++++ ++
chr19:44284164-44284496	151	CAGCCAATCAGCAGCCGCGCTGCGGCTCTGCCGGCACCCGCTCCAATCAGGAGGCGCCGCCCCTGCAGTCTAGCT	190	1	n	9.9e-05	++++++++ ++
chr19:44284164-44284496	226	GCGGGAGACAGGGGGGTGCGGGAAGGGGGCGGTGGTGGTGCCTCTTCTGTCCCCCACCCCCTTCCCCTCCGGGCT	278	2	n	7.7e-06	+++ ++++++
chr4:151861761-151862673	1	TGGCCCCGCCCCGCGGCCCACGCACAGCGCCCACTGGTTGGTGCGTCTGCCAGTCACGGCTCCCGCGACCAATCG GACCGCACCAGGGGTCTCACTACTCTCCGGGAGGAGCGTCCTATCCACCCTGTCCATTGGCTGATCACCACCGCA	5	2	n	1.1e-05	++++++++ +
chr4:151861761-151862673	1	TGGCCCCGCCCCGCGGCCCACGCACAGCGCCCACTGGTTGGTGCGTCTGCCAGTCACGGCTCCCGCGACCAATCG GACCGCACCAGGGGTCTCACTACTCTCCGGGAGGAGCGTCCTATCCACCCTGTCCATTGGCTGATCACCACCGCA	47	3	n	2.4e-05	+++ ++ +++
chr4:151861761-151862673	1	TGGCCCCGCCCCGCGGCCCACGCACAGCGCCCACTGGTTGGTGCGTCTGCCAGTCACGGCTCCCGCGACCAATCG GACCGCACCAGGGGTCTCACTACTCTCCGGGAGGAGCGTCCTATCCACCCTGTCCATTGGCTGATCACCACCGCA	66	1	n	6.2e-05	++++++++++++ +
chr4:151861761-151862673	1	TGGCCCCGCCCCGCGGCCCACGCACAGCGCCCACTGGTTGGTGCGTCTGCCAGTCACGGCTCCCGCGACCAATCG GACCGCACCAGGGGTCTCACTACTCTCCGGGAGGAGCGTCCTATCCACCCTGTCCATTGGCTGATCACCACCGCA	125	1	y	2.5e-05	++ + ++++++++
chr4:151861761-151862673	151	CCGACTAAAGTGATTGGCCTGGAATCAACGCCCCCTCCCCACCCACTCCCGGGAAAACCCGCCCTCCAGACCTAA	188	2	n	1.4e-05	+++ +++ +++
chr4:151861761-151862673	151	CCGACTAAAGTGATTGGCCTGGAATCAACGCCCCCTCCCCACCCACTCCCGGGAAAACCCGCCCTCCAGACCTAA	208	2	n	6.8e-06	+++++++ ++
chr4:151861761-151862673	226	ACAAAGCTTCCTAGTGGACAGAGGTCGAAAGGATGGCCCAATCAGGATGAGGCTGACACGGAATATTTCCTCGAG	260	1	n	9e-05	+ ++++++++ +
chr4:151861761-151862673	301	GCCGAGACGTGGTGTTTTGATTGGACGTCACTACAGTGTTTCCCAAGCCGTCCAGACCAATCAAAGGGGGTTCCC	314	1	y	1.2e-05	+++ +++++++ ++
chr4:151861761-151862673	301	GCCGAGACGTGGTGTTTTGATTGGACGTCACTACAGTGTTTCCCAAGCCGTCCAGACCAATCAAAGGGGGTTCCC	354	1	n	1.1e-05	+++++++++ +++
chr4:151861761-151862673	376	GGAACTCGGGAACGGCTGTGGGAAGCCCCGCCCCCCAGCGTGACCGTCATGAGGAAGGCGCTCGCTCATTGGTGT	402	2	n	9.3e-07	++++++++++
chr4:151861761-151862673	376	GGAACTCGGGAACGGCTGTGGGAAGCCCCGCCCCCCAGCGTGACCGTCATGAGGAAGGCGCTCGCTCATTGGTGT	437	1	y	9e-05	+ ++ ++++++
chr4:151861761-151862673	676	CCCGACACGGGGGAGGGGCGCACCTCCCGGCAGACCACGCCCCTCGGCCAAATCCCGCCCCTTCCTGGCCTCAGC	711	2	n	9.1e-05	+ ++++++ +
chr4:151861761-151862673	676	CCCGACACGGGGGAGGGGCGCACCTCCCGGCAGACCACGCCCCTCGGCCAAATCCCGCCCCTTCCTGGCCTCAGC	729	2	n	9.3e-07	++++++++ ++
chr4:151861761-151862673	751	CCCGCCCCCTCGGCCGGCGCAGCGTCCCCGCGGCCACCCTACGCTCCCGCCTGCCTTGCGCTCCTCTGTCCCCTT	751	2	n	9.2e-08	+++++++++++
chr4:151861761-151862673	751	CCCGCCCCCTCGGCCGGCGCAGCGTCCCCGCGGCCACCCTACGCTCCCGCCTGCCTTGCGCTCCTCTGTCCCCTT	796	2	n	9.5e-05	++++++ ++
chr11:73018850-73019161	1	CTCCCGAGCCACCTCCTCCCGATCCCGTCGAGACCCGCCCCCTCTACCCCTGGGCGGGAGGACCGGACTCTGATT GGACATCTCTGCGGGGCGCTGCGCGGCACAGCCAATGATCGTgggccggcgcggcggcgggcggggggAGCGAGC	34	2	n	9.2e-08	+++++++++++
chr11:73018850-73019161	1	CTCCCGAGCCACCTCCTCCCGATCCCGTCGAGACCCGCCCCCTCTACCCCTGGGCGGGAGGACCGGACTCTGATT GGACATCTCTGCGGGGCGCTGCGCGGCACAGCCAATGATCGTgggccggcgcggcggcgggcggggggAGCGAGC	48	2	y	5.9e-05	+++++++
chr11:73018850-73019161	1	CTCCCGAGCCACCTCCTCCCGATCCCGTCGAGACCCGCCCCCTCTACCCCTGGGCGGGAGGACCGGACTCTGATT GGACATCTCTGCGGGGCGCTGCGCGGCACAGCCAATGATCGTgggccggcgcggcggcgggcggggggAGCGAGC	67	1	y	4.8e-06	++++++++++ ++
chr11:73018850-73019161	1	CTCCCGAGCCACCTCCTCCCGATCCCGTCGAGACCCGCCCCCTCTACCCCTGGGCGGGAGGACCGGACTCTGATT GGACATCTCTGCGGGGCGCTGCGCGGCACAGCCAATGATCGTgggccggcgcggcggcgggcggggggAGCGAGC	104	1	n	4e-05	++++++++ + +
chr11:73018850-73019161	1	CTCCCGAGCCACCTCCTCCCGATCCCGTCGAGACCCGCCCCCTCTACCCCTGGGCGGGAGGACCGGACTCTGATT GGACATCTCTGCGGGGCGCTGCGCGGCACAGCCAATGATCGTgggccggcgcggcggcgggcggggggAGCGAGC	130	2	y	4.5e-05	++ +++++++
chr11:73018850-73019161	151	GCAGCCTGGAGCTGCGGCGCCAGCGGGTTGAGCCGGGCGATCCTAGCCCGGCAAGGCGGGCAGGGCGGGGCGCGC	209	2	y	2.4e-05	++ +++++++
chr18:33213824-33214211	1	AACCCCGCGCGTTTCAGCAAGATATTTTCCAGCCCGCCCAGCGCGGCTGGCAGCAGCCAATGGGCGCGGGACGCC	33	2	n	4.2e-05	+++++++ +
chr18:33213824-33214211	1	AACCCCGCGCGTTTCAGCAAGATATTTTCCAGCCCGCCCAGCGCGGCTGGCAGCAGCCAATGGGCGCGGGACGCC	54	1	n	3.4e-06	++++++++ ++ ++
chr18:33213824-33214211	76	TTCCAGCCACAGCCAATCAGAAGGCAGAAGGCTGCCTTGGTGAAGGCGAGCAACGCCCTTCAGCCCCGCCCTGCC	85	1	n	1e-07	++++++++++++++
chr18:33213824-33214211	76	TTCCAGCCACAGCCAATCAGAAGGCAGAAGGCTGCCTTGGTGAAGGCGAGCAACGCCCTTCAGCCCCGCCCTGCC	140	2	n	2.4e-05	+++++++ ++
chr18:33213824-33214211	151	CGAATCCTCGGAGGGGAACCTCCGTGGGGTGTTAGCGGGAGTAACGTGTGTTCGCTGGGATTGGCTGGTGCCTCA	204	1	y	2.9e-05	+++ +++++++++
chr18:33213824-33214211	226	GCGTGAAGGGAGCCGATTGGCCTCCGAGGATGGACCGATTCCGCGTGCGTGTGGGCTGGCCGGAGCCAGACAGAG	235	1	y	3.3e-05	+ ++++++++++
chr12:108275443-108275781	1	ccgggcggagagggggcggggcgccgccgTTGGGCCACGCCTCCGAAAGGGAGGCGGTCAGAGGAGTGGCAGGCC	10	2	y	9.2e-08	+++++++++++
chr12:108275443-108275781	76	CCCGAGGTCCCCCTACGCGGTgcgccggcccgccgggcgcccTGCCAGAGGCGCGCTCGAGCCACGGTCCCGCCC TCCCACAGGTCTGATTGGCCAGGTTCGGGGGTGTGCGGGAGGGGCGGGGCGCGCGCGGGGAGGCTGAAAAGATGG	144	2	n	1.9e-06	+++++++ +++
chr12:108275443-108275781	76	CCCGAGGTCCCCCTACGCGGTgcgccggcccgccgggcgcccTGCCAGAGGCGCGCTCGAGCCACGGTCCCGCCC TCCCACAGGTCTGATTGGCCAGGTTCGGGGGTGTGCGGGAGGGGCGGGGCGCGCGCGGGGAGGCTGAAAAGATGG	158	1	y	1.5e-05	+ ++++++++++++
chr12:108275443-108275781	76	CCCGAGGTCCCCCTACGCGGTgcgccggcccgccgggcgcccTGCCAGAGGCGCGCTCGAGCCACGGTCCCGCCC TCCCACAGGTCTGATTGGCCAGGTTCGGGGGTGTGCGGGAGGGGCGGGGCGCGCGCGGGGAGGCTGAAAAGATGG	188	2	y	1.2e-06	++ ++++++++
chr12:108275443-108275781	301	GGCCTGGGCCAATCCCAGGACTACAAGGGGTTTTAAAA	306	1	n	9.9e-05	++++++++ +++
chr18:34751540-34751888	1	AGAGGTCTGACCATTCAAACCTTCCACTCTCTCAACAACCTATCACCACTCTCCTGCTAGCAGCGTCAGCCAATC ATCGCACCAGAACATGACCCCGCCCCCTAACCAATCGCTATTTTCGTACCTAGTCCGCTGGGCAGCTCCGCCATA	67	1	n	6.7e-06	++++++++++ ++
chr18:34751540-34751888	1	AGAGGTCTGACCATTCAAACCTTCCACTCTCTCAACAACCTATCACCACTCTCCTGCTAGCAGCGTCAGCCAATC ATCGCACCAGAACATGACCCCGCCCCCTAACCAATCGCTATTTTCGTACCTAGTCCGCTGGGCAGCTCCGCCATA	94	2	n	5.2e-07	++++++++++
chr18:34751540-34751888	151	CAGAGAGCCTGGTACATATTGGCTCTCCCTCTGGCCAATCGCCACATCCTTCCTTGTACTAAATTCTCTCGCCCC	182	1	n	8.3e-06	++++++++++ ++
chr17:35046655-35047074	1	ACTGGAGCCGCCAATTCGCAGCACTTTCCCGCCTTTTCCGTCACCTCAGCCGCGACGATCCACCTCCCTGACCAA	28	2	n	2.2e-05	++++++ ++
chr17:35046655-35047074	76	CCGCCGCAAGCCTGCAGCCTGTAGGCGTGGGCCGCGCGCGCTCGCCCCGCCCCCTTAGTGGCTGAAAGGGTCTGC	121	2	n	7.3e-07	++++++++++
chr17:35046655-35047074	151	TTAGCCATCCAACGGGAAGGCGGTGAGGACGCTAGATGTCGATTGGTCCGTTTGCATTGGGGGCGGTGCTAGAGT	186	1	y	8.1e-05	+ +++++++++
chr17:35046655-35047074	226	GTTCAAAATTCCCGCCCTCTGCCGTTGCTAAGCAGCCGTGTCGCAGAGCTTTGATTGATGTTGGGCGGAGCCCGC CCTAAACTAAGGTCCCCGCCTGGAAAAAGGGTCTGGGCCACGGTGGAGAAGGCCAGAGCCCGGAGGCCGACCTTA	236	2	n	3.3e-06	+++++++ ++
chr17:35046655-35047074	226	GTTCAAAATTCCCGCCCTCTGCCGTTGCTAAGCAGCCGTGTCGCAGAGCTTTGATTGATGTTGGGCGGAGCCCGC CCTAAACTAAGGTCCCCGCCTGGAAAAAGGGTCTGGGCCACGGTGGAGAAGGCCAGAGCCCGGAGGCCGACCTTA	276	4	y	3.5e-05	++++++ +++
chr17:35046655-35047074	226	GTTCAAAATTCCCGCCCTCTGCCGTTGCTAAGCAGCCGTGTCGCAGAGCTTTGATTGATGTTGGGCGGAGCCCGC CCTAAACTAAGGTCCCCGCCTGGAAAAAGGGTCTGGGCCACGGTGGAGAAGGCCAGAGCCCGGAGGCCGACCTTA	296	2	n	6.5e-05	+++++++
chr5:117287398-117287873	226	CCCGGGACCAACCGCAGGTCGGGTCACGCCCCTTCGCTCTCTGATTGGCTGAGCCGGAGCTGGGCGGTCCGAGCG	250	2	n	6.5e-05	+ ++++++ ++
chr5:117287398-117287873	226	CCCGGGACCAACCGCAGGTCGGGTCACGCCCCTTCGCTCTCTGATTGGCTGAGCCGGAGCTGGGCGGTCCGAGCG	263	1	y	1.2e-07	+++++++++++++
chr7:118705477-118705964	301	CTCGAGAAAGAGCCCGCCCTCCAGCCAATCAGAGTCCCGGAGCTTCGGCGTTGGGGGGCCGGAACCGCTGTCATG	322	1	n	1.9e-07	+++++++++++++
chr7:16781185-16781501	1	TGTTATTCACCCTAGGTTGCCCACTGTGATCTTGGCTCCGCCCCTCGCTCGCCACCTGGCGCCGAATGTTCCATA ACCAATCAGCGCTTGCGGGACGGCCTCCGCCTTTTCAAGTCCCGCCCTCCGCTTTTTCAAGTCACGCCCCTCCGC	74	1	n	2.8e-07	+++++++++++ ++
chr7:16781185-16781501	1	TGTTATTCACCCTAGGTTGCCCACTGTGATCTTGGCTCCGCCCCTCGCTCGCCACCTGGCGCCGAATGTTCCATA ACCAATCAGCGCTTGCGGGACGGCCTCCGCCTTTTCAAGTCCCGCCCTCCGCTTTTTCAAGTCACGCCCCTCCGC	116	2	n	4.7e-06	+++++++ ++
chr7:16781185-16781501	1	TGTTATTCACCCTAGGTTGCCCACTGTGATCTTGGCTCCGCCCCTCGCTCGCCACCTGGCGCCGAATGTTCCATA ACCAATCAGCGCTTGCGGGACGGCCTCCGCCTTTTCAAGTCCCGCCCTCCGCTTTTTCAAGTCACGCCCCTCCGC	138	2	n	7.1e-05	+ ++++++ ++
chr14:122534149-122534508	76	GACCAGCTCCCTCCCAAGCCTACTCGCCAGGGGGCGGAGCTTAGAGCTCAAGGCTCCTGATTGGCCGTCCCGCGG	129	1	y	2.6e-06	++ +++++++++++
chr14:122534149-122534508	151	GCACTCCCCTTCCCCGCCCCTTGACGAGGGTGAGAGGTCAGCAGCCGGCAAGTCTGCGGGGTGGACGATGGCGGG	163	2	n	2.1e-06	++++++++ +
chr15:79328142-79328561	1	AAGACAGGGGCACCAGGAGGTTTGGGAAAGGGCCGTCAggccccgcccccgccgcgccgTCACTCACCTCGGCTT	42	2	n	4.1e-07	+++++++++ +
chr15:79328142-79328561	1	AAGACAGGGGCACCAGGAGGTTTGGGAAAGGGCCGTCAggccccgcccccgccgcgccgTCACTCACCTCGGCTT	57	3	n	1.4e-05	+ ++++ +++
chr15:79328142-79328561	76	ACTCAGCACTTCTCAGCCCTCCTACTTCCGCAAACTGACGCGCCCCGCCCACGTGACGACACTACGGCTCTCCAC	119	2	n	1.7e-05	+++++++ +
chr15:79328142-79328561	226	GCCATCTTCTATAACTGCCCAATGGAAGCCGCTTCTGTTGCCAGGGGGCGGTCGGGCTTCTGACTGAAGCCAATT	241	1	n	5.2e-05	++ +++++ + +++
chr6:83317158-83317811	226	CGCCGCGCTCCGCAACCCCACGGACTCGCTCCCCGACACACTCACCGCACTGCCGCCAGGTGGAAGGGCTGTAGG CGGGGGTGGCAGCCGTGCGTGGGGCGCAACAACCGCACAGCCAACGCAGACAACAAGGAAACTGAAGCCATGGCT	294	2	y	3.7e-05	+ ++++++
chr6:83317158-83317811	376	CGCGCCGGTGCCCGCGCCGGAGAGAAGCGCGCGCGCGGGCCACGAAGCTATACCCCGGGCCCACGAAAGCCCCGC CTCCCGCGCGCCCATTGGCCCCTGAGCCGGCGTAGGAGCCAATAGGAGATCTCAGTTCTACGTAAGCTGGTCCAG	446	2	n	3.3e-06	++++++ +++
chr6:83317158-83317811	376	CGCGCCGGTGCCCGCGCCGGAGAGAAGCGCGCGCGCGGGCCACGAAGCTATACCCCGGGCCCACGAAAGCCCCGC CTCCCGCGCGCCCATTGGCCCCTGAGCCGGCGTAGGAGCCAATAGGAGATCTCAGTTCTACGTAAGCTGGTCCAG	458	1	y	1.8e-05	++ ++ +++++++
chr6:83317158-83317811	376	CGCGCCGGTGCCCGCGCCGGAGAGAAGCGCGCGCGCGGGCCACGAAGCTATACCCCGGGCCCACGAAAGCCCCGC CTCCCGCGCGCCCATTGGCCCCTGAGCCGGCGTAGGAGCCAATAGGAGATCTCAGTTCTACGTAAGCTGGTCCAG	486	1	n	1.5e-05	+++++++ ++++
chr6:83317158-83317811	526	GAGCAGGTCCTGATTGGCTGAAGGAGTCAAGCCCCTGACTGAGGAGAGGCAGCAGTGGTCCCTCAGCTAGGCCAA	532	1	y	4.1e-07	++ +++++++++++
chr2:30981899-30982470	1	AGTCCAGGGAACCTCTCTCTTCCGGCGCGCAGAAGTGTCGTCAGAGCGTCGGCTGCACTCAGACCCGCCTCCGCC	64	2	n	3.3e-06	++++++ ++ +
chr2:30981899-30982470	76	TTGCCAGGCCACACCCCAAGCCCGTAGGGCCCCGCCTCAGCAGGGCAGGCAACCACTCCGAACTCCGAAAAGCAA	106	2	n	3e-05	++++++ + +
chr2:30981899-30982470	376	CATAGGCTCTCCCGATTGGACGTCTGACGGTGAGGAGGCGGGGCGTGGCAGGCAGAGCCACAAGACTCTAGGCAG	384	1	y	3.5e-05	++ ++++++++ ++
chr2:30981899-30982470	376	CATAGGCTCTCCCGATTGGACGTCTGACGGTGAGGAGGCGGGGCGTGGCAGGCAGAGCCACAAGACTCTAGGCAG	407	2	y	1.1e-06	++++ ++++++
chr2:30981899-30982470	451	CGCCGCGGTGGGCTAGCTTGACTGACAGGCGGCGCGGTTGCGACGGCAGGTGAGTTTCTGACGGCTGCTGCCTGC	469	3	y	2.9e-06	+++ ++++++
chr6:47594986-47595381	76	CCCCCCAGCACTATCAAGCGCCTCTCCGATTGGAGGATGCGAGAGGGCGCCCGTCCAATCAGAGGGCCGAACGGG	98	1	y	5.2e-05	++++++++++ +
chr6:47594986-47595381	76	CCCCCCAGCACTATCAAGCGCCTCTCCGATTGGAGGATGCGAGAGGGCGCCCGTCCAATCAGAGGGCCGAACGGG	127	1	n	4.3e-06	++ +++++++++++
chr6:47594986-47595381	151	CTGGGAGCCTTCGGAGCGAGCTCCAGCCCTGGGAGCGCGAGGCTCACCAGCGCGTGCGCGAGTGACAGGGCTCGC	209	3	y	3.3e-05	++ ++++++
chr6:47594986-47595381	301	CAGGAAAGCCATGGACAGGCAGGCGGAGGCCGGGCACTTGGCGGGACCCGAAGCCCGCTATGGGCAGGAGGCGGG	365	2	y	2.5e-06	+++ ++++++
chr10:127121117-127121413	1	TCTTCCGCTCCGTCTCTGCTAGAGATGTCCCTTCCGCCCCAAACCTGGCAGCGGCCTCACCCGCCCATTAGCGCC	60	2	n	2e-05	+++++++ +
chr10:127121117-127121413	76	CCAAGCTTTCATTGGCTGTCCGGGAGCTCTCTCTTACGTAACGCATCCTCATTTGTAAACGTGGCGTCAAAGCCT	80	1	y	1.3e-06	+++ + ++++++++
chr10:127121117-127121413	151	CCAGGGAGGCGGGTCGCATTGTTAGTAAAAATCAATAGCTGTTTCTGATTGGCCAAGAGCAACAACCAATCATCG GCGAGATTGGGCCCCTCCCCTCCTCGCTCCTTAATCCTGAGGTGTGGTATGTGGCTGTGTTCTTTTGCCTG	153	2	y	6.1e-06	+++ ++++++
chr10:127121117-127121413	151	CCAGGGAGGCGGGTCGCATTGTTAGTAAAAATCAATAGCTGTTTCTGATTGGCCAAGAGCAACAACCAATCATCG GCGAGATTGGGCCCCTCCCCTCCTCGCTCCTTAATCCTGAGGTGTGGTATGTGGCTGTGTTCTTTTGCCTG	192	1	y	3.4e-07	+++++++++++++
chr10:127121117-127121413	151	CCAGGGAGGCGGGTCGCATTGTTAGTAAAAATCAATAGCTGTTTCTGATTGGCCAAGAGCAACAACCAATCATCG GCGAGATTGGGCCCCTCCCCTCCTCGCTCCTTAATCCTGAGGTGTGGTATGTGGCTGTGTTCTTTTGCCTG	213	1	n	2.1e-05	++++++++++ ++
chr19:60755841-60756210	1	CGCCCGCCCCTTCCCCGATCGCCACCAATCAGCGTCCCGACCGGCGCCCGCGGAGTCAGGTCCGCAGCCATTGAG	3	2	n	9.3e-07	++++++++ ++
chr19:60755841-60756210	1	CGCCCGCCCCTTCCCCGATCGCCACCAATCAGCGTCCCGACCGGCGCCCGCGGAGTCAGGTCCGCAGCCATTGAG	22	1	n	3.3e-05	+ +++++++++ +
chr19:60755841-60756210	76	CGCCAGGGCCCGAGGCGGCGCCTCACCCGCCCCCTCGCAGGATGCCAGGCGCCCCGCAGCTGGTGAGGTGGGCGC	101	2	n	9.2e-08	+++++++++++
chr19:60755841-60756210	76	CGCCAGGGCCCGAGGCGGCGCCTCACCCGCCCCCTCGCAGGATGCCAGGCGCCCCGCAGCTGGTGAGGTGGGCGC	137	2	y	5.7e-05	++ + ++ +++
chr19:60755841-60756210	151	AGCGCACGGGGCGCAGGAAACGCGCGGGGCTGGAGAAGAGCGCGCGCCCGCCTCCGCTCCGCCTCCGTCCGGGGG	197	2	n	3.3e-06	++++++ ++ +
chr10:85128010-85128297	1	AGTTCCCACCCTGTTCCGCAGGCCTCTCCACTCAGGAAACAGATCCTAGGTAACTGGCAGGGCTTCGCCTTGGCT	5	2	n	9.1e-05	+++ +++ +
chr10:85128010-85128297	76	GGTAACCAATCAGAGCTCGAGAAACTGATGTGCAGGAAGTCACGCCTCCATCCCGAGCGTAGCCAATTAGAACAC	78	1	n	2.1e-08	++++++++++++++
chr10:85128010-85128297	76	GGTAACCAATCAGAGCTCGAGAAACTGATGTGCAGGAAGTCACGCCTCCATCCCGAGCGTAGCCAATTAGAACAC	135	1	n	1e-05	++++++++ +++++
chrX:52912104-52912466	1	AGGTCCGCGCGCGAGCAGGAGGCGGGGCACCCCGAACCTTTCGAGGGGCCGGTCTGCGCGCGTGCGCCGTCCTTC	16	2	y	2.5e-06	+++ ++++++
chrX:52912104-52912466	76	GGCGGCTTCAACCGCCCCGGCTCGGTGGCCAATCAGAGTGCCCGGCGCGCTCGAGACGTCTCAACGTCCTGTGGG	101	1	n	2.8e-07	+++++++++++++
chrX:52912104-52912466	226	CTGGCGACAGAGCCCCGCTCTTCGGCAGTGCCGGAGAACCGACTCCCGCCTTCCCCGTCTTCCCTCGTGGGCGCT	270	2	n	9.5e-06	++++++ +++
chr5:130144450-130145117	1	GCAGAGAGCCGCTTCCCTAGATAAGTGGCCTGGACCAAGGGAGGTAGCGCTCCCGTTAGTTAGATAGCCAATCAG AATGGAACAAACCCAACCAGACGTGTTTACCCTATAATTGGACAATGCTCTTGCCAATCATAGCAGGAGTTCATG	65	1	n	1.2e-07	+++++++++++++
chr5:130144450-130145117	151	AAACCTCGGCCAATAGCAAGAAGCGCCTGGTTCCGATTTGCAGCGCAGGGTCCACGCGGTGGTTGCTGATCGAGG	157	1	n	3.3e-05	++++++++ + +++
chr5:130144450-130145117	226	TCGTCAGTGGGCGATCACCTCCCCTCGGCCAAACCCTGGAGCAGACAGGCGTCGCTCGCGCTTGTCAGCCAAGAG CCAATCAGAATTGGGTAGGCCTGTAGCCACTACGGCTTAAGGCCGAATTGTTTGTTCTGTGATTGGGCGAACCTC	298	1	n	1.5e-06	++++++++++++
chr5:130144450-130145117	226	TCGTCAGTGGGCGATCACCTCCCCTCGGCCAAACCCTGGAGCAGACAGGCGTCGCTCGCGCTTGTCAGCCAAGAG CCAATCAGAATTGGGTAGGCCTGTAGCCACTACGGCTTAAGGCCGAATTGTTTGTTCTGTGATTGGGCGAACCTC	356	1	y	4.3e-05	++ +++++++ ++
chr5:130144450-130145117	376	CTGACAATCAGGGCGGAGCCAGCGAAGATTCGGCCAATGGCTGGAGGCAGCCAGGTCAGACCAGCGACTAACTGT	376	3	n	5.3e-05	+++ ++++++
chr5:130144450-130145117	376	CTGACAATCAGGGCGGAGCCAGCGAAGATTCGGCCAATGGCTGGAGGCAGCCAGGTCAGACCAGCGACTAACTGT	406	1	n	6.9e-05	++++++++ + ++
chr5:130144450-130145117	526	CCCGCCGGCGGCCCATCTCGTCATGTCAGGCACTGCTTGGCTTTAGTTCTTCAGGCCTCCGCCCACCCGCCTACC CGAAGCCGCGCCCACCGCCCAGAGCCAGAGGGATGGTGGTAGTCACCGGGCGGGAGCCAGACAGCCG	591	2	n	1.1e-05	++++++ +++
chr7:92669862-92670398	76	CTAGGGGAGGGGAAATGTGCGGTAAGGGGCGGGGCCGTTGGAAACACCAGGCGGGATTGGCTGGCCCGCGCGTGT	98	2	y	3.3e-06	+ ++++++++
chr7:92669862-92670398	151	CACAGGCCCCGCCCCCGGCCCTTCCGCAATACGTCCAAGCACCGCCTTCTTCCTCGGTCGAGTCTCGGCTTTCGC	158	2	n	1.5e-06	+++++++++
chr7:92669862-92670398	226	AACACCTCCGGCTCGGAGACGCGGTGCAAAGGACGGTCGGCTCTCATTGGCCAATTCGTAAGGGACTGTTCGGTC	265	1	y	2.4e-07	+++++ ++++++++
chr7:92669862-92670398	451	TGCCTCCTGGGTGCGGGCGGGGGTTGGCATGAGCTGGAAGAGCGAAAGCCTCCAGTCAAGGCCAGTCGCCCCGTC	461	2	y	5.1e-05	+ + +++++++
chr10:127676822-127677201	1	TATTGGGTAAGCTTTCCATCAATCTCATTTGTAAATAAACCGCGGACGGAAGCAGATTGCGGGGAAAGGGCGGGC	64	2	y	6.8e-06	++ +++++++
chr10:127676822-127677201	151	GAGGCCCCGCCTGCTCCACGGGTGGGGGTGGGGGCGGGTCTCGCAGCCGATTGGCTGCCGGCGCTGCCCGTTCGG	156	2	n	5.7e-05	++++++ +++
chr10:127676822-127677201	151	GAGGCCCCGCCTGCTCCACGGGTGGGGGTGGGGGCGGGTCTCGCAGCCGATTGGCTGCCGGCGCTGCCCGTTCGG	178	2	y	7.3e-07	+ +++++++++
chr10:127676822-127677201	151	GAGGCCCCGCCTGCTCCACGGGTGGGGGTGGGGGCGGGTCTCGCAGCCGATTGGCTGCCGGCGCTGCCCGTTCGG	194	1	y	1.4e-05	+ +++++++++++
chr18:7626772-7627247	76	CCGCCACAACTCCTGCCTTGGCCCCGCCCCGGGGCGGAGACTCTGGGGGCGGGGTTTCGAAGTTCGGAGGCGGGG	98	2	n	2e-05	++++++++
chr18:7626772-7627247	76	CCGCCACAACTCCTGCCTTGGCCCCGCCCCGGGGCGGAGACTCTGGGGGCGGGGTTTCGAAGTTCGGAGGCGGGG	118	2	y	1.9e-06	+++++++++
chr18:7626772-7627247	76	CCGCCACAACTCCTGCCTTGGCCCCGCCCCGGGGCGGAGACTCTGGGGGCGGGGTTTCGAAGTTCGGAGGCGGGG	139	2	y	1e-05	++ ++++++
chr18:7626772-7627247	151	TCTCGCTGGGAGGTGCATTGGCGGGGCGGGGCCTATGGGCCTATGGGCCAAGAGCAACAGAGTGTCAGTCAAGGA	170	2	y	6.1e-06	++ ++++++++
chr18:7626772-7627247	151	TCTCGCTGGGAGGTGCATTGGCGGGGCGGGGCCTATGGGCCTATGGGCCAAGAGCAACAGAGTGTCAGTCAAGGA	212	3	n	4.9e-05	+++++ +++
chr18:7626772-7627247	226	GTCGGCTGATGGACTTGCCTAAGGAAAAAGGTCGTCTCAGCGCTCTCTCATTGGTTGGCAAGGGCAAACATAGCA	269	1	y	2.3e-06	++++ ++++++++
chr18:7626772-7627247	301	GAGCTCTTATTGGTAGCGGCACTGTAGCTCCTCCTCTCCGTCCCCGCCCCGACCCGCTGCTGTGTTTGCCCTTGG	343	2	n	1.4e-05	++++++++ +
chr11:54437960-54438343	1	CCAGAGGCTTTCTCTTGCCACCCAGCCGCGCGCGCCCTCGCACGCCCCGCCCCGTGAGAGGCCGCGTGACGGACC	46	2	n	9.5e-06	++++++++ +
chr11:54437960-54438343	76	CGTGAGCCAGCCAATGGCAGGCGGCCCCGCCTCCCCACCCCCACCCCGCCCCCCGCTCAGTTTGCTGCCACGTGA	83	1	n	7.5e-06	++++++++ + +++
chr11:54437960-54438343	76	CGTGAGCCAGCCAATGGCAGGCGGCCCCGCCTCCCCACCCCCACCCCGCCCCCCGCTCAGTTTGCTGCCACGTGA	101	2	n	1.5e-06	++++++ ++++
chr11:54437960-54438343	76	CGTGAGCCAGCCAATGGCAGGCGGCCCCGCCTCCCCACCCCCACCCCGCCCCCCGCTCAGTTTGCTGCCACGTGA	120	2	n	4.1e-07	++++++++++
chr11:54437960-54438343	151	TACGGCTCGTCGCCAGCCAATCGCCGCGACCTCAATCTCGCGCTCCGCCCCGCGCGCCGTGGCCGTTTGAAGTGA	164	1	n	4.8e-06	++++++++++ ++
chr11:54437960-54438343	301	TCCCAGCCGAGCGACCCCAGTCTTGCGGCGGCCAGCATGGCCCCCACCCTGTTCCAGAAGCTCTTCAGCAAGCGG	343	2	n	9.1e-05	+++ +++ +
chr3:96414841-96415007	1	CTAGCCGCCCTCGACCTTAAATACCCCATGGCGCGCGCTGATTGGTCGAGCCCAGCACTTGCGGAAATGCTCCCT	35	1	y	2e-06	++ +++++++++++
chr3:96414841-96415007	76	CTTCCCCATTTGTCCTCCCGCTTCCCCACTCTTCCTAGCCAGTCACTTGCAAAaaataaataaataaaaaataaa taaTAAAATCTGTTTC	130	4	n	8.7e-05	++++++ ++
chr3:96414841-96415007	76	CTTCCCCATTTGTCCTCCCGCTTCCCCACTCTTCCTAGCCAGTCACTTGCAAAaaataaataaataaaaaataaa taaTAAAATCTGTTTC	145	4	n	6.2e-05	++++++ ++
chr17:33909171-33909595	1	CGGTCTTACCCGATGCGACTCCACGCGATGGCTTGGGGTTGTGGGGCAGGTCTGAGGCTGGAGTTTCTGATTGGC CGAGCGGCTTCGGCAAGCTCCTGGTGCAAAGAGCTCCACGCCTCGCCGCGGAGCAGGCCGGTGCCGTACGGCAAC	64	1	y	8.2e-07	+++++++++++++
chr17:33909171-33909595	151	ATGGCGCGCCCCATCTACCTGGTCCTCCGCCCCGCCCCGTCGAGCCTCCGCGTCCCCGGAGCGGTGGCCTCGGTG	181	2	n	4.7e-06	++++++++ ++
chr11:78550705-78551051	1	TACGTGGTTAGAAGCCCCGCGCCCGAGCTGTGCCGTCCCGCCCCCGGCTCACACAGGCCGTACCTATTGGTCGAA	37	2	n	1.5e-06	+++++++++
chr11:78550705-78551051	1	TACGTGGTTAGAAGCCCCGCGCCCGAGCTGTGCCGTCCCGCCCCCGGCTCACACAGGCCGTACCTATTGGTCGAA	60	1	y	6.6e-05	++ ++ ++++++++
chr11:78550705-78551051	76	GGGGAAAAACAGAAGCGGCTCGTGAGTGGGTGGAGGCCCTCGTGGCCCGCCCATATAGCGGGGCTATAGTTTGAA	121	2	n	4.5e-05	+++++++
chr11:78550705-78551051	151	TGATGGCCTACCTGTTGTTTCCATTGGCTGCTGGGAGTACCGCGTGAGGGGGCGTGGCTCTGAGCGGTCCACGTC	167	1	y	5.4e-06	+++ + ++++++++
chr11:78550705-78551051	151	TGATGGCCTACCTGTTGTTTCCATTGGCTGCTGGGAGTACCGCGTGAGGGGGCGTGGCTCTGAGCGGTCCACGTC	196	2	y	3.4e-05	+++++++++ +
chr5:122502181-122502590	76	CGCCGCCGCCGCGGCATGTGGACGCCGCTCATTGGCCGAGAGAGCCCCCAgcgcggcgcgggcggcgcggccccg ccccctcctccggcgccctcccgcgcgcgcgcaccgcgcgcccacgccgccagcaggccccgcctcctcccgcgc	100	1	y	5.4e-06	++ ++ ++++++++
chr5:122502181-122502590	76	CGCCGCCGCCGCGGCATGTGGACGCCGCTCATTGGCCGAGAGAGCCCCCAgcgcggcgcgggcggcgcggccccg ccccctcctccggcgccctcccgcgcgcgcgcaccgcgcgcccacgccgccagcaggccccgcctcctcccgcgc	147	2	n	9.2e-08	+++++++++++
chr5:122502181-122502590	76	CGCCGCCGCCGCGGCATGTGGACGCCGCTCATTGGCCGAGAGAGCCCCCAgcgcggcgcgggcggcgcggccccg ccccctcctccggcgccctcccgcgcgcgcgcaccgcgcgcccacgccgccagcaggccccgcctcctcccgcgc	209	2	n	1.1e-06	++++++ ++++
chr1:93511869-93512296	76	TATGGGGCTCCCTCGCCCCGCCCTGTCCCATGTGATCACCAATCAGAGCTAGGTGCTGCGCTCGCAGGCGCCGGT	92	2	n	2e-05	+++++++ ++
chr1:93511869-93512296	76	TATGGGGCTCCCTCGCCCCGCCCTGTCCCATGTGATCACCAATCAGAGCTAGGTGCTGCGCTCGCAGGCGCCGGT	111	1	n	2.3e-06	+ ++++++++++++
chr1:93511869-93512296	151	CGGGAGGACCCGCCCGCAGGCCAATCGGTGGTGCGTCCgcgggggggcggggctgcggcggacgcgcggcggggg cggggaagcagctagctgtcgggatcgggcggcgcgggcgcaggacgtggaggaggcctggctggcggcggcgca	168	1	n	2.9e-05	++++++++++ ++
chr1:93511869-93512296	151	CGGGAGGACCCGCCCGCAGGCCAATCGGTGGTGCGTCCgcgggggggcggggctgcggcggacgcgcggcggggg cggggaagcagctagctgtcgggatcgggcggcgcgggcgcaggacgtggaggaggcctggctggcggcggcgca	191	2	y	1.7e-07	+++++++++++
chr1:93511869-93512296	151	CGGGAGGACCCGCCCGCAGGCCAATCGGTGGTGCGTCCgcgggggggcggggctgcggcggacgcgcggcggggg cggggaagcagctagctgtcgggatcgggcggcgcgggcgcaggacgtggaggaggcctggctggcggcggcgca	219	2	y	4.1e-07	+ +++++++++
chr1:93511869-93512296	301	ggccggtgtggcacggtgaggacgcggcggccgtgggcgggggaggggAGCGAGCCGCGCAGGGGCGCTGGGTTG	331	2	y	1.1e-05	+ +++++++
chr6:72097353-72097711	1	AATCACGCGCAAGCCTGGGGAGAGTTGAAGAGATCCCCGAGCGCGGGGCACCCTCATCCTAGGCTGCCTGGCGCC CCACCTACTTCTCGGCTGGAGTTGTCCCGCTCCCCCTCGCACTAGCAGTCGGAGGGGGCGGGGGGACAGTCCGCT	75	2	n	6.5e-05	+++ ++ ++
chr6:72097353-72097711	1	AATCACGCGCAAGCCTGGGGAGAGTTGAAGAGATCCCCGAGCGCGGGGCACCCTCATCCTAGGCTGCCTGGCGCC CCACCTACTTCTCGGCTGGAGTTGTCCCGCTCCCCCTCGCACTAGCAGTCGGAGGGGGCGGGGGGACAGTCCGCT	127	2	y	9.2e-08	+++++++++++
chr6:72097353-72097711	151	CGCAGGCGGGGCCTCGGCGCACTCTGATTGGTCTCCCTTATCCTCGTGACGCGCGACCCCGCCCCCGCCTACCCC CACCCCCCTCAGCATCCGCGCGGGGGAGCGGACTGTCCGGGGCTGAATTGGCGCGAgcgcggcgccgggggctgg	171	1	y	6.1e-06	++++++++++++
chr6:72097353-72097711	151	CGCAGGCGGGGCCTCGGCGCACTCTGATTGGTCTCCCTTATCCTCGTGACGCGCGACCCCGCCCCCGCCTACCCC CACCCCCCTCAGCATCCGCGCGGGGGAGCGGACTGTCCGGGGCTGAATTGGCGCGAgcgcggcgccgggggctgg	208	2	n	4.1e-07	+++++++++ +
chr6:72097353-72097711	151	CGCAGGCGGGGCCTCGGCGCACTCTGATTGGTCTCCCTTATCCTCGTGACGCGCGACCCCGCCCCCGCCTACCCC CACCCCCCTCAGCATCCGCGCGGGGGAGCGGACTGTCCGGGGCTGAATTGGCGCGAgcgcggcgccgggggctgg	224	2	n	9.5e-06	+++ ++++++
chr6:134640871-134641244	1	AAGGCAGCGCCGCCCCAGCCTCCAGCGCGCGTCTCTTGCCCCGCCCCACCCCTCGGGTTTGGAGGCGGGACCTCC	40	2	n	5.3e-06	++++++++ ++
chr6:134640871-134641244	1	AAGGCAGCGCCGCCCCAGCCTCCAGCGCGCGTCTCTTGCCCCGCCCCACCCCTCGGGTTTGGAGGCGGGACCTCC	59	2	y	1.3e-05	++ ++++++
chr6:134640871-134641244	76	AAACCCGGAACTGAAGGCCGCGCATTGCCGGCCCGGCCAATCGGCGTCCCGGAAGGAGCGAGCTGAAGCCACCGA	109	1	n	8.3e-06	+++++++++++ +
chr6:134640871-134641244	151	GCCAGTGAATGACAGCAGCGCCGCCCGCCGGTCGCGGCTGCAGCCCTGCCGGCGTCCCGAGCCTCCTGTCAACGC	156	3	y	1.1e-05	+++ ++++++
chr14:67008448-67009184	76	GCTGTCAGTCATACGCACAATCTCGGTCCCAACCAATGAGCTGTCGTCTGctcccgcccactcccccaccaccac	77	3	n	2.9e-06	++++++ +++
chr14:67008448-67009184	76	GCTGTCAGTCATACGCACAATCTCGGTCCCAACCAATGAGCTGTCGTCTGctcccgcccactcccccaccaccac	105	1	n	2.9e-05	++++++++ ++ +
chr14:67008448-67009184	76	GCTGTCAGTCATACGCACAATCTCGGTCCCAACCAATGAGCTGTCGTCTGctcccgcccactcccccaccaccac	128	2	n	1.9e-06	+++++++ +++
chr14:67008448-67009184	151	caccaaccccccccccccgcccgcacGGCGGCGGCCGAGCGGCTCCTCCTCCCCCATCCCTCCGCTGAGCCCGGC	166	2	n	5.1e-05	+++++++ + +
chr14:67008448-67009184	376	TATCCGGCTCTCGAGCAGCAACACAACAAGTCGAGTTCCCCCGCCCCCTTTTCTGCGTCTGCGCAGTCCCTCCCT	415	2	n	7.3e-07	++++++++++
chr14:67008448-67009184	451	TCGTGACGTCAGGGCCCTCCCGGACCATGTGATGACAACACAGGCAGCTGGACGGCGGGGTCGGAGCCCAGGATA GGGGGCGTGACCAGGCCGGGCTGGGCGGGGCATTCGCGAGCTGCTCGGGACGTGCGGGTGCGGAAGTCGAGCTGA	524	2	y	5.9e-05	++++++++ +
chr14:67008448-67009184	451	TCGTGACGTCAGGGCCCTCCCGGACCATGTGATGACAACACAGGCAGCTGGACGGCGGGGTCGGAGCCCAGGATA GGGGGCGTGACCAGGCCGGGCTGGGCGGGGCATTCGCGAGCTGCTCGGGACGTGCGGGTGCGGAAGTCGAGCTGA	544	2	y	2.8e-05	++ +++++++
chr7:30600051-30600335	1	GGATCTCGGCCAGGGAGGCACCTTGCACAAACCAGTTCTGGTCCCAGCCTGCGGTGGCACCGCTCATTGGCTGGC	60	1	y	2.3e-06	++ ++ ++++++++
chr7:30600051-30600335	76	CCTGAGCCACAACCAATGAGACACGAGGGCGCTCTCAAAGAGGCCGGCCTTGATCTGCCGCTGCCGCTTCTGATT GGCCGCAAGGCTGCACTCGCTGTTGATTGATCAGAGGGCCAGAGGCGTGTGGAGCCCGCAGCTTTTCTAGGCTAG	85	1	n	7.7e-05	++++++++ +++
chr7:30600051-30600335	76	CCTGAGCCACAACCAATGAGACACGAGGGCGCTCTCAAAGAGGCCGGCCTTGATCTGCCGCTGCCGCTTCTGATT GGCCGCAAGGCTGCACTCGCTGTTGATTGATCAGAGGGCCAGAGGCGTGTGGAGCCCGCAGCTTTTCTAGGCTAG	142	1	y	4.1e-07	++++++++++++++
chr18:54902422-54902703	76	ATCGCTAGAGCCCCTCACCAAAGCCCTGGAAGCTGGAAGCAGGCTCCACATCCCCGCCCCCACAATGGTCCCCAT	128	2	n	7.3e-07	+++++++++ +
chr18:54902422-54902703	226	AAAGGAAGGGACCCAACCACACAGGCCATCAATCAGTGGCTATCTTGGTCCGCAGG	251	3	n	3e-05	+ +++++++
chr2:155381709-155382362	1	ACAGCCACCCGCTGGCAAACCGCGGAGGGGCGGGGAAAGAGCATTCGGCGCCTGTGATTGGCTGCCGTCCCGACG	24	2	y	1.2e-06	++ ++++++++
chr2:155381709-155382362	1	ACAGCCACCCGCTGGCAAACCGCGGAGGGGCGGGGAAAGAGCATTCGGCGCCTGTGATTGGCTGCCGTCCCGACG	51	1	y	6.8e-07	+++ ++++++++++
chr2:155381709-155382362	76	GCCGCTGACGCGAGCGGGCGGGCCCCTTTGTGACGTCACAATCAGCTGTTGAAGCGTTCGGATTTGTGCCCTGAG	87	2	y	2.6e-05	+++ +++++++
chr2:155381709-155382362	376	GTTCTTTGTCTGTCTCCGCCGGCGGCAGCCGGAGCTGCGTTCTTGGCTCCCTATTGGTTGCTCCAAGCCGGTAGG	422	1	y	3.1e-05	++ ++ ++++++++
chr2:155381709-155382362	451	CCATGACGTTGCTTTATTTGCATATGACATTGAGACGTCACCAAGGCCAGCCCCGCCTTCCAGGCTTGCATGGGT	502	2	n	2.2e-05	++++++ ++
chrX:152342414-152342771	76	CCAGGCCCCGCCCACTCCCTGGCATGGCGTCTGCTCTGCCCGCCATTGGCTGCAGGCCTCGGAGCTGGCGGTAGC	82	2	n	1.9e-06	+++++++ +++
chrX:152342414-152342771	76	CCAGGCCCCGCCCACTCCCTGGCATGGCGTCTGCTCTGCCCGCCATTGGCTGCAGGCCTCGGAGCTGGCGGTAGC	114	1	y	2.3e-05	++ + ++++++++
chrX:152342414-152342771	151	GTTCCCTCAGCCCCTGCCTTCTCTCACGCAATCCGCTTGCCAACACTACACATCATCATTTTCTAATTGGCTCCC	210	1	y	5.9e-05	++++ +++++++
chrX:152342414-152342771	226	TTCGCGCCCACCAATCATCAGGCTGACTGCCCCTCAGTGATGAGAGGAAAACTGCGGGGCGATTGGCTATGAGGA	281	1	y	8.1e-05	+ ++++++++++
chrX:152342414-152342771	301	AAGCTAGGGTAGGAGCCCCCTCACCCTCAGTCTTGCAATGTTTTAGCCAATGGGAAA	344	1	n	2e-06	++++++++ ++++
chr11:60417001-60417432	76	GCCACTCCCGCCCCCGTCAATCAGCATCATAAACGTGCTCGCCACGCCCCCTCCATGCCGCGCCACGGGAAGAAA	82	2	n	2.5e-06	+++++++++
chr11:60417001-60417432	76	GCCACTCCCGCCCCCGTCAATCAGCATCATAAACGTGCTCGCCACGCCCCCTCCATGCCGCGCCACGGGAAGAAA	118	2	n	3.4e-05	+ +++++++++
chr11:60417001-60417432	151	ACTACAAGTCCCAGAGGGCCGTTCGCGCTCTGCGCCACGTGCTTTCTCTGTCCGCCAATGGGCGGAAGCGCCGCG	202	1	n	4.6e-05	+ ++++++ ++ ++
chr11:60417001-60417432	226	TGAGCTTGCTCCCGCCTCTCCAGCGCGCCCGCGCCAATTGGAAGCTGCAGAgtgtgtgtgtgtttgtgtgtgtgt	236	2	n	6.8e-06	++++++ + ++
chr12:76255089-76255511	1	AAACTTGCTCAGACAGGCCCATTCCTGCCCGGACTCCGCCCAGTTCCACCGCGCCCCCTACACACTATCTCTGAT TGGCTAAAAGCGAGGCGGGAAGCTCCCGGCTCATCAGAGGCGGGCTCCACACAGGCTCTTTCCGCAGCCAGTCAT	50	2	n	9.1e-05	+ ++++++++
chr12:76255089-76255511	1	AAACTTGCTCAGACAGGCCCATTCCTGCCCGGACTCCGCCCAGTTCCACCGCGCCCCCTACACACTATCTCTGAT TGGCTAAAAGCGAGGCGGGAAGCTCCCGGCTCATCAGAGGCGGGCTCCACACAGGCTCTTTCCGCAGCCAGTCAT	68	1	y	3.5e-08	+++++++++++++
chr12:76255089-76255511	1	AAACTTGCTCAGACAGGCCCATTCCTGCCCGGACTCCGCCCAGTTCCACCGCGCCCCCTACACACTATCTCTGAT TGGCTAAAAGCGAGGCGGGAAGCTCCCGGCTCATCAGAGGCGGGCTCCACACAGGCTCTTTCCGCAGCCAGTCAT	84	2	y	4.2e-05	+ + ++++++
chr12:76255089-76255511	1	AAACTTGCTCAGACAGGCCCATTCCTGCCCGGACTCCGCCCAGTTCCACCGCGCCCCCTACACACTATCTCTGAT TGGCTAAAAGCGAGGCGGGAAGCTCCCGGCTCATCAGAGGCGGGCTCCACACAGGCTCTTTCCGCAGCCAGTCAT	109	2	y	2.8e-05	+ ++++++
chr19:44248166-44248549	1	TATTCCGATGCTCGCTCGTTGCACTCAGCCCCGCCTCCGCTCCCACGCCCTGTCTCTGCTTAGGCAAGCCTGGCG GGCGGGAGCCTAGAGTCGGAGGAGACAAAGGGAAAGGCGTGGCGTCCCTGCCGGGGTTACTCTCGGTCAGCACCC GCCCACAGGGTCACTCCCGTTCACTCGGCCCACAGCGCCTGACCCCGCGCAGCCAATCAGCGACCGCGCTGCGGC	30	2	n	3.3e-06	++++++ ++ +
chr19:44248166-44248549	1	TATTCCGATGCTCGCTCGTTGCACTCAGCCCCGCCTCCGCTCCCACGCCCTGTCTCTGCTTAGGCAAGCCTGGCG GGCGGGAGCCTAGAGTCGGAGGAGACAAAGGGAAAGGCGTGGCGTCCCTGCCGGGGTTACTCTCGGTCAGCACCC GCCCACAGGGTCACTCCCGTTCACTCGGCCCACAGCGCCTGACCCCGCGCAGCCAATCAGCGACCGCGCTGCGGC	71	2	y	5.4e-05	++ +++++++
chr19:44248166-44248549	1	TATTCCGATGCTCGCTCGTTGCACTCAGCCCCGCCTCCGCTCCCACGCCCTGTCTCTGCTTAGGCAAGCCTGGCG GGCGGGAGCCTAGAGTCGGAGGAGACAAAGGGAAAGGCGTGGCGTCCCTGCCGGGGTTACTCTCGGTCAGCACCC GCCCACAGGGTCACTCCCGTTCACTCGGCCCACAGCGCCTGACCCCGCGCAGCCAATCAGCGACCGCGCTGCGGC	148	2	n	1.4e-05	+++++++ +
chr19:44248166-44248549	1	TATTCCGATGCTCGCTCGTTGCACTCAGCCCCGCCTCCGCTCCCACGCCCTGTCTCTGCTTAGGCAAGCCTGGCG GGCGGGAGCCTAGAGTCGGAGGAGACAAAGGGAAAGGCGTGGCGTCCCTGCCGGGGTTACTCTCGGTCAGCACCC GCCCACAGGGTCACTCCCGTTCACTCGGCCCACAGCGCCTGACCCCGCGCAGCCAATCAGCGACCGCGCTGCGGC	200	1	n	9.6e-07	+++++++++++ +
chr19:44248166-44248549	226	TCTGCAGGAGCCCGATCCAATCAGAAGGCGCCGCCCGTGCAGCCCACACCTTGAAGTTGCCATCCTAGATGAGGC	239	1	n	7.5e-06	+ +++++++++++
chr11:22287024-22287281	1	CTAACCCTACCCACGGCGGCTCAACCTCCGTCCGCCTCGCCGCCATTGGCCGAGTCTGCGGGAGCCCCGCCTCCT CGGCGGGCGGGCCTTAGGACGAGCGAGGCACTCCATTGGTAGATCTTCATGCCGGTCATAGGGGATCCACCCCCC	39	1	y	2.6e-05	++ + ++++++++
chr11:22287024-22287281	1	CTAACCCTACCCACGGCGGCTCAACCTCCGTCCGCCTCGCCGCCATTGGCCGAGTCTGCGGGAGCCCCGCCTCCT CGGCGGGCGGGCCTTAGGACGAGCGAGGCACTCCATTGGTAGATCTTCATGCCGGTCATAGGGGATCCACCCCCC	66	2	n	1.1e-06	++++++ ++++
chr11:22287024-22287281	151	CAGTTTTTTTTTTTCCCTTAGGTGGAACCCGCCCGGTCTACCCTCTTCTTCTTTAAAAAAAAAAAAGTGTAAATC	178	2	n	8.8e-05	+++++++ ++
chr11:22287024-22287281	226	ACGAAGGACGATCCCGCCCATTCCCTGGAATG	238	2	n	8.5e-06	+++++++ ++
chr7:19003006-19004179	226	TGCCTGAAACCATCCCCTTGAAACCGTCCAATCAGAGCCTCTCCGCCCCAATTCCCCCAAAGCTGCTGCCTTTCT	250	1	n	2.3e-06	++ +++++++++++
chr7:19003006-19004179	301	AACCGGTTATTGGCCCTTCTTGAAGGGGCGGGATTCTAAGAGAGGGCAAGACTCTTCTAGAACTGCTCAGCAAAT	303	1	y	5.9e-05	++ + +++++++
chr7:19003006-19004179	301	AACCGGTTATTGGCCCTTCTTGAAGGGGCGGGATTCTAAGAGAGGGCAAGACTCTTCTAGAACTGCTCAGCAAAT	322	2	y	9.3e-07	++ ++++++++
chr7:19003006-19004179	676	tgtctgaggacagctgcagtgtacttacatataataaataaataaataaataaatctaaaaaaaaaaaaaaaaga	708	4	n	8.7e-05	++++++ ++
chr7:19003006-19004179	676	tgtctgaggacagctgcagtgtacttacatataataaataaataaataaataaatctaaaaaaaaaaaaaaaaga	720	4	n	8.7e-05	++++++ ++
chr7:19003006-19004179	751	ttgtttaaaaaaaaaaaaaaGAAAGAAAGAGGGGGCGGGGAAAGGGGGGAAATTGCATCCACAGCAACTTGGCCA	779	2	y	9.2e-08	+++++++++++
chr11:79992765-79993317	151	CCGGGCCCGCGGTCGGCAGCGCGCACGGGCCAACCAAGCCGCGCCTCCGCGAGAAGCGCCTCCGCGTGACTGACG GGGGACTCTGCGGACCAACGGGCTgggcggcccggcggcgcgcgctcccgccggccAATCAGAGCGCCGGGCGGG	217	3	y	1.6e-05	+++ ++++ +
chr11:79992765-79993317	151	CCGGGCCCGCGGTCGGCAGCGCGCACGGGCCAACCAAGCCGCGCCTCCGCGAGAAGCGCCTCCGCGTGACTGACG GGGGACTCTGCGGACCAACGGGCTgggcggcccggcggcgcgcgctcccgccggccAATCAGAGCGCCGGGCGGG	277	1	n	8.5e-08	++++++++++++++
chr18:12121310-12121722	226	GCTCAGCCAATCAGGGGGCCACTCGCCCGGGCGCCCGCCTCCTTAAAGGGGCCACGCGCTTGAGGGCTCCAAGCG	229	1	n	5.9e-07	+++++++++++ ++
chr18:12121310-12121722	226	GCTCAGCCAATCAGGGGGCCACTCGCCCGGGCGCCCGCCTCCTTAAAGGGGCCACGCGCTTGAGGGCTCCAAGCG	259	2	n	4.7e-06	++++++ +++
chr17:31564324-31564984	76	TCCACCCAGTTCCACAAACCTTTATCCGAAGGGAGGGAGCAGACGAGTGCGCAGAGGAGGCGTGGTCTATAGCTC	129	2	y	6.8e-05	++++ ++++ +
chr17:31564324-31564984	151	TCTGGGCCACGCCCCACGGCGTGGTCATGAAACATAAGCTCTGCCTCTGGGGCGGGGCAGGCTGCTACTGGCGCC	196	2	y	2.4e-05	++++++++
chr17:31564324-31564984	226	CGGGCTGGGCCGCTGGGTGGGGCCTGGCTGAGTGCGCGCAGCGGGGCGGGACCGGCCTCTGCCCCGCCCCGCTTG	236	2	y	9.1e-05	+ +++ +++
chr17:31564324-31564984	226	CGGGCTGGGCCGCTGGGTGGGGCCTGGCTGAGTGCGCGCAGCGGGGCGGGACCGGCCTCTGCCCCGCCCCGCTTG	265	2	y	1.7e-05	+ ++++++++
chr17:31564324-31564984	226	CGGGCTGGGCCGCTGGGTGGGGCCTGGCTGAGTGCGCGCAGCGGGGCGGGACCGGCCTCTGCCCCGCCCCGCTTG	288	2	n	1.7e-05	++++++++ +
chr17:31564324-31564984	301	GGccctcccccgccccctgcctcgcccccgccccacccgccccgccccccgcccGCCGTCGCGCTgggcgggggc ggggcccggggtcggcaggccccgcccccgcggTGAATATTGATGCGGCGCGCATCGGCGTCGCCCTCCTCCCAT	309	2	n	2.6e-07	++++++++++
chr17:31564324-31564984	301	GGccctcccccgccccctgcctcgcccccgccccacccgccccgccccccgcccGCCGTCGCGCTgggcgggggc ggggcccggggtcggcaggccccgcccccgcggTGAATATTGATGCGGCGCGCATCGGCGTCGCCCTCCTCCCAT	327	2	n	5.3e-06	++++++++ ++
chr17:31564324-31564984	301	GGccctcccccgccccctgcctcgcccccgccccacccgccccgccccccgcccGCCGTCGCGCTgggcgggggc ggggcccggggtcggcaggccccgcccccgcggTGAATATTGATGCGGCGCGCATCGGCGTCGCCCTCCTCCCAT	341	2	n	4.1e-07	++++++++++
chr17:31564324-31564984	301	GGccctcccccgccccctgcctcgcccccgccccacccgccccgccccccgcccGCCGTCGCGCTgggcgggggc ggggcccggggtcggcaggccccgcccccgcggTGAATATTGATGCGGCGCGCATCGGCGTCGCCCTCCTCCCAT	368	2	y	4.1e-07	+ +++++++++
chr17:31564324-31564984	301	GGccctcccccgccccctgcctcgcccccgccccacccgccccgccccccgcccGCCGTCGCGCTgggcgggggc ggggcccggggtcggcaggccccgcccccgcggTGAATATTGATGCGGCGCGCATCGGCGTCGCCCTCCTCCCAT	396	2	n	4.1e-07	+++++++++ +
chr17:31564324-31564984	526	CTGCAGCCGCTTGTCAGTGTGATGAAGATTGGCACCCAGGTAAGCTGTCACTCAACCGCTccgccgccgccgccg	570	3	n	2e-06	++++++ +++
chr17:31564324-31564984	601	ccgccgctctcgctgccgccgtccctatcaatcacaccggccgaggccgccgctgccgcc	625	3	n	5.1e-06	++ +++++++
chr4:119733600-119733950	1	GAGCATCCGCGCAAGCGCGGCTTTCCAACCCCCAGCGAGGAGGCGGGGAGTGGGCGGAGCCGACGTCTCCCAGGC CAATCGAAAGCGAGCGCCCCCGCCCTCGGCGCTGTGGACTGAGCTTGACCCCGGTCGCGGACGGGGGCGTGGCCC	37	2	y	1.1e-06	++++ ++++++
chr4:119733600-119733950	1	GAGCATCCGCGCAAGCGCGGCTTTCCAACCCCCAGCGAGGAGGCGGGGAGTGGGCGGAGCCGACGTCTCCCAGGC CAATCGAAAGCGAGCGCCCCCGCCCTCGGCGCTGTGGACTGAGCTTGACCCCGGTCGCGGACGGGGGCGTGGCCC	72	1	n	1.6e-05	+++++++++ +++
chr4:119733600-119733950	1	GAGCATCCGCGCAAGCGCGGCTTTCCAACCCCCAGCGAGGAGGCGGGGAGTGGGCGGAGCCGACGTCTCCCAGGC CAATCGAAAGCGAGCGCCCCCGCCCTCGGCGCTGTGGACTGAGCTTGACCCCGGTCGCGGACGGGGGCGTGGCCC	94	2	n	9.5e-06	+++++++ +
chr4:119733600-119733950	1	GAGCATCCGCGCAAGCGCGGCTTTCCAACCCCCAGCGAGGAGGCGGGGAGTGGGCGGAGCCGACGTCTCCCAGGC CAATCGAAAGCGAGCGCCCCCGCCCTCGGCGCTGTGGACTGAGCTTGACCCCGGTCGCGGACGGGGGCGTGGCCC	136	2	y	8.8e-05	+++++++ +
chr4:119733600-119733950	151	TAGAGGGGGCGTGGTTGAGGGATGGAGGCGGGTCCTGGGGCTGTCAGTCGGCGCCCGCCGCCGCGGCTGCTCGCA	153	2	y	3.4e-05	+++++++++ +
chr4:119733600-119733950	151	TAGAGGGGGCGTGGTTGAGGGATGGAGGCGGGTCCTGGGGCTGTCAGTCGGCGCCCGCCGCCGCGGCTGCTCGCA	172	2	y	1.4e-05	++ ++++++
chr4:119733600-119733950	151	TAGAGGGGGCGTGGTTGAGGGATGGAGGCGGGTCCTGGGGCTGTCAGTCGGCGCCCGCCGCCGCGGCTGCTCGCA	191	3	n	3.4e-05	++++++ ++
chr14:16364970-16365879	76	GGGTCCCGCCCCCCTAGGGGCCTGAAATTTTGGGATTGGTCGAAGTACTGTAGTGACAAGGCTGTGATTGGACGA	80	2	n	1.1e-06	++++++++++
chr14:16364970-16365879	76	GGGTCCCGCCCCCCTAGGGGCCTGAAATTTTGGGATTGGTCGAAGTACTGTAGTGACAAGGCTGTGATTGGACGA	136	1	y	1e-05	+++ +++++++ ++
chr14:16364970-16365879	151	TCCATGGTTGACTGACAGCCGGTGACCACCGCACCCTCCCCCTCCCGGAGCGCGCCTGTGTGTGCCGTGTTATGC	159	3	y	2.9e-06	+++ ++++++
chr14:16364970-16365879	751	TGGGTGGTGAGTGCGGCGCGGGCGGGCGCATTGTTCGTGGGCCGCGGGCGACGCGGGCGGGGTGAGAGCGTGGTG	766	2	y	4.5e-05	+ + +++++++
chr14:16364970-16365879	751	TGGGTGGTGAGTGCGGCGCGGGCGGGCGCATTGTTCGTGGGCCGCGGGCGACGCGGGCGGGGTGAGAGCGTGGTG	801	2	y	7.4e-05	+ +++++++
chr13:3917924-3918373	301	ATCGGCCAATCAGAGAGTGGGAAGCGGTTGCTAGGCTACGTGGAGTCCCGCCCTAATCAGAAGACTTCATACCAA	303	1	n	4.8e-07	+++++++++++++
chr13:3917924-3918373	301	ATCGGCCAATCAGAGAGTGGGAAGCGGTTGCTAGGCTACGTGGAGTCCCGCCCTAATCAGAAGACTTCATACCAA	347	2	n	6.8e-05	+++++++
chr1:43098481-43098926	1	GTCACAGGGGGCGGGACCAATGGCGGCCAGCTCGCGTTGCTTAGCCTCCGGTGCTTTCGGCGCAGCCCGGGCAGG	5	2	y	2.6e-07	++++++++++
chr1:43098481-43098926	151	ACTCTCTGGGAAAAGCATCGCGTCTCGGGCGCGCTGAGTGACACCAGAGTCCCGCCCCCTCACGTCACTTCCGCG	185	3	y	4.7e-05	+++ +++++
chr1:43098481-43098926	151	ACTCTCTGGGAAAAGCATCGCGTCTCGGGCGCGCTGAGTGACACCAGAGTCCCGCCCCCTCACGTCACTTCCGCG	201	2	n	9.2e-08	+++++++++++
chr2:69205947-69206471	226	AGTCTTTCAATTTCAAACTCTCCACCGCCTGCTTACCCGCCCTTCAACTCCGTCTTCTGATTGGCTGACAGGGCA	261	2	n	2e-05	+++++++ +
chr2:69205947-69206471	226	AGTCTTTCAATTTCAAACTCTCCACCGCCTGCTTACCCGCCCTTCAACTCCGTCTTCTGATTGGCTGACAGGGCA	279	1	y	1e-07	++++++++++++++
chr3:108256828-108257329	226	AGGTCCGGTGAAGAAGCTTGTCAAGTCCAATCATCGCGGCGAGAATATCAATCAGCCAATAAAAGGGAAGCACGG GAGGGCGGGCTAAAAAGGTCGCGTGCGCACGCGCAGACGGCTGCAGGGTCCTTGGTGCTGTGGCGGTGTGGTTGA	249	1	n	9e-05	+ +++++++ ++
chr3:108256828-108257329	226	AGGTCCGGTGAAGAAGCTTGTCAAGTCCAATCATCGCGGCGAGAATATCAATCAGCCAATAAAAGGGAAGCACGG GAGGGCGGGCTAAAAAGGTCGCGTGCGCACGCGCAGACGGCTGCAGGGTCCTTGGTGCTGTGGCGGTGTGGTTGA	278	1	n	6.1e-06	++++++++ + +++
chr3:108256828-108257329	226	AGGTCCGGTGAAGAAGCTTGTCAAGTCCAATCATCGCGGCGAGAATATCAATCAGCCAATAAAAGGGAAGCACGG GAGGGCGGGCTAAAAAGGTCGCGTGCGCACGCGCAGACGGCTGCAGGGTCCTTGGTGCTGTGGCGGTGTGGTTGA	299	2	y	1.9e-06	+++ +++++++
chr2:144011191-144011688	76	ACCCGGACCAGCCATTCATCGAGCTGCCTCTTCCTATTGGTTCACTAGCCGCCACTCTGCCGGCCTCTGACCAAT CAGACCGCGGACGGCCGCGCCGCGGTGGCGACCATTGGCCAAAAAGGAGGGTCTACGTCTCAGCCAATGAGAGAG	105	1	y	2.5e-05	+++++ +++++++
chr2:144011191-144011688	76	ACCCGGACCAGCCATTCATCGAGCTGCCTCTTCCTATTGGTTCACTAGCCGCCACTCTGCCGGCCTCTGACCAAT CAGACCGCGGACGGCCGCGCCGCGGTGGCGACCATTGGCCAAAAAGGAGGGTCTACGTCTCAGCCAATGAGAGAG	143	1	n	2.6e-05	++++++++++++ +
chr2:144011191-144011688	76	ACCCGGACCAGCCATTCATCGAGCTGCCTCTTCCTATTGGTTCACTAGCCGCCACTCTGCCGGCCTCTGACCAAT CAGACCGCGGACGGCCGCGCCGCGGTGGCGACCATTGGCCAAAAAGGAGGGTCTACGTCTCAGCCAATGAGAGAG	178	1	y	3.8e-05	++ + ++++++++
chr2:144011191-144011688	76	ACCCGGACCAGCCATTCATCGAGCTGCCTCTTCCTATTGGTTCACTAGCCGCCACTCTGCCGGCCTCTGACCAAT CAGACCGCGGACGGCCGCGCCGCGGTGGCGACCATTGGCCAAAAAGGAGGGTCTACGTCTCAGCCAATGAGAGAG	211	1	n	8.2e-07	++++++++ ++++
chr2:144011191-144011688	226	AGGAGGAGCTGCGGGGAGCCGCGGGGGGCGGGGCCGAAGAGGGGCGGAGCCGCGCAGCGCAACTCTCAGCTCTGC	247	2	y	4.1e-07	++++++++++
chr2:144011191-144011688	301	GCGGGGGCGGGTCTCTAACTCCCCGCCCACCTAGGGAGGTCCTCTGCCGGTCCCGCCCACTCCAGGCCTCCGCTC	301	2	y	4.1e-07	+ +++++++++
chr2:144011191-144011688	301	GCGGGGGCGGGTCTCTAACTCCCCGCCCACCTAGGGAGGTCCTCTGCCGGTCCCGCCCACTCCAGGCCTCCGCTC	322	2	n	9.5e-06	+++++++ ++
chr2:144011191-144011688	301	GCGGGGGCGGGTCTCTAACTCCCCGCCCACCTAGGGAGGTCCTCTGCCGGTCCCGCCCACTCCAGGCCTCCGCTC	352	2	n	1.9e-06	+++++++ +++
chr7:101933811-101934219	226	AACAGCCGACTGGGGCCAATGAGAGGGCGGCGAGAGGGGGCGGGATCATAGTTTAAACTAATCGTGTCTTCACCG	238	1	n	4.3e-06	+++++++ +++++
chr7:101933811-101934219	226	AACAGCCGACTGGGGCCAATGAGAGGGCGGCGAGAGGGGGCGGGATCATAGTTTAAACTAATCGTGTCTTCACCG	259	2	y	9.2e-08	+++++++++++
chr8:31111634-31111893	1	TCCCCAGGTCTGGCTAGGAGGCGGGGTAGGAATCTACCCAGAAAAAAGCTCCCCTGTCCAGAGGGTAAACTGGCT	15	2	y	3.8e-06	+++ ++++++
chr8:31111634-31111893	76	TGTAAATAATACCCCAGGGCAGGAGAAAGGCTCCCATTGGCCGGAGGGCAGGTGACGAAAAGGGGGCGGGCTCCC	105	1	y	2e-06	+++++ ++++++++
chr8:31111634-31111893	76	TGTAAATAATACCCCAGGGCAGGAGAAAGGCTCCCATTGGCCGGAGGGCAGGTGACGAAAAGGGGGCGGGCTCCC	135	2	y	7.3e-07	++++++++++
chr17:28486116-28486458	1	TgcgccgggcagcgcccgccgtcgtcccgcccccgccggccgcAGGACCCACCTCCCATAGGGCCACGGGGCTGC	26	2	n	4.1e-07	+++++++++ +
chr17:28486116-28486458	1	TgcgccgggcagcgcccgccgtcgtcccgcccccgccggccgcAGGACCCACCTCCCATAGGGCCACGGGGCTGC	48	2	n	2.6e-05	+++ ++ +++
chr17:28486116-28486458	76	CAATCCGCCCCCAAAAGGCGCGCGGGCTGTCGCTCCGCCCGTCCCGATTGGTGGCCGTGCACTGCCTATGCAAAT	116	1	y	3.5e-05	++ +++++++++ +
chr17:28486116-28486458	226	GCCGGAGAAGAGGGATGGAGGAAGCTGACTGACACCTCGCCTCGTCGTCCACTGCCTCCAGACTAAATACTGACC	251	3	y	4.9e-05	+++ +++++
chr5:146220963-146221514	1	TCCCCTGCGACCTGGATTTGGCTTTGGGGCCGGCCAATCAGCAACTAGCAAAGCTCAACCAGCAAGCAATAAGCC AATCGGATAAGAGGTAAGTGTCTCTCCCCTCGGAACCCCGCCCCCTAGCACGTCCTCCTCTCCGAGGCGTCTCCC	31	1	n	3.8e-06	+++++++++++ +
chr5:146220963-146221514	1	TCCCCTGCGACCTGGATTTGGCTTTGGGGCCGGCCAATCAGCAACTAGCAAAGCTCAACCAGCAAGCAATAAGCC AATCGGATAAGAGGTAAGTGTCTCTCCCCTCGGAACCCCGCCCCCTAGCACGTCCTCCTCTCCGAGGCGTCTCCC	71	1	n	1.6e-05	+++++++++++
chr5:146220963-146221514	1	TCCCCTGCGACCTGGATTTGGCTTTGGGGCCGGCCAATCAGCAACTAGCAAAGCTCAACCAGCAAGCAATAAGCC AATCGGATAAGAGGTAAGTGTCTCTCCCCTCGGAACCCCGCCCCCTAGCACGTCCTCCTCTCCGAGGCGTCTCCC	112	2	n	5.2e-07	++++++++++
chr5:146220963-146221514	151	GGAAGTAGTAGTGAGACTCACCAAATGACCCTTCCCCCGCCCCGTGTACCCAACGCCCCCTCCCCCCGACCCCAC CTCCAGCGCGATGACCCGCGGTTGTTCTCACCGAGGCGGCGAGGGGGCGGAAGGTTCTTGGCCGAGCCTTCGAAG	186	2	n	9.5e-06	++++++++ +
chr5:146220963-146221514	151	GGAAGTAGTAGTGAGACTCACCAAATGACCCTTCCCCCGCCCCGTGTACCCAACGCCCCCTCCCCCCGACCCCAC CTCCAGCGCGATGACCCGCGGTTGTTCTCACCGAGGCGGCGAGGGGGCGGAAGGTTCTTGGCCGAGCCTTCGAAG	221	2	n	3.7e-05	+++ ++ ++
chr11:120232743-120233043	1	GGTAGTAGCCCTGCTGCTCCCTGATTGGCAGCTCCCTGGCCCGGCGCCAGCCTATTGGGAGGCCTGTTTACGCCG	22	3	y	6e-06	++++++ +++
chr11:120232743-120233043	76	AATGAGTGGCACGAGCTCAGGGCCGTGGAGGGCCGAGCAGCCAATCAGCGCTCGGGCTGCTCCGGGCTGAGTGGC	113	1	n	1.9e-07	+++++++++++ ++
chr13:45389508-45389944	1	GGAGGAGCGTCGCCCAGTGGCAGAGGCCGCGACCGTGCTGGGGATTGGGGAGAGGATGGGCTCCCACCTCCCGCA	63	2	n	2e-05	+++ ++ +++
chr13:45389508-45389944	76	GCTCCACAGGCGGTGCCGGGAGGCGGGGCTTCAGCCCACCGAGACTGGGAATTGGTTGCCGGAGCTGGGGAGGAG	92	2	y	3.3e-06	+++ ++++++
chr13:45389508-45389944	151	GGGCAAGCACGCTGTGATTGGCGGAGTCCGGTGCCGGAGGGGCGGGGCCTCTATAAAAGACGCGTGCCTGTAGCG	161	1	y	8.3e-06	+++ ++++++++ +
chr13:45389508-45389944	151	GGGCAAGCACGCTGTGATTGGCGGAGTCCGGTGCCGGAGGGGCGGGGCCTCTATAAAAGACGCGTGCCTGTAGCG	186	2	y	1.2e-06	++ ++++++++
chr13:45389508-45389944	301	CGCGAGTGGCGGCTGCGTGGGGTGCAGGGCGGGTGGCCGCACGGCTGCACCTTCCTCACGGAGCCCGGAGTCGAC	323	2	y	4.5e-05	+ +++++++
chr13:80885501-80886394	1	CGCAGGGCTGGAATAGTTTCAATGACTTCAAACTGGCAGCTCGCTCTCAAACTAGCCTGGTAGCTGAGCGCCCGC CCCAGGCGCCCGGCGATAGGCGGAGCAGCGTTTGTTAGCCTGTTGCTAAGGCGATGCCAGGCGTTGATTGGATTG	71	2	n	1.9e-05	++++++++
chr13:80885501-80886394	1	CGCAGGGCTGGAATAGTTTCAATGACTTCAAACTGGCAGCTCGCTCTCAAACTAGCCTGGTAGCTGAGCGCCCGC CCCAGGCGCCCGGCGATAGGCGGAGCAGCGTTTGTTAGCCTGTTGCTAAGGCGATGCCAGGCGTTGATTGGATTG	136	1	y	2.9e-05	++ +++++++ +
chr13:80885501-80886394	151	GGCTGGTGGGGGTGGGGAGGATCAAGCCGGCTCGCGCCGGTTGGGGCGAGGCTTGGAACCGGCGTGCGCCGGTAA	156	2	y	7.7e-06	+ +++++ +++
chr13:80885501-80886394	526	GCCAGATTGAACCGGTCACCGGCTGGGGCGTGGAAAGCGGAAgcgcggcgcgcggtggccccgcccccggcTCAG	585	2	n	1.5e-06	+++++++++
chr13:80885501-80886394	676	gagcgggcgggccggcTGAGAGCTGCTCAGCGCCGGTTTAGGCCGGTCCTCTCCTGCTCCAGTCTAGTTCTTGAT TGACAGCCAGGCACTTGTTTACCACGGCGCGGCGGCCGCCGCTCGCCTCAATGAGACTGCTGAGCTGGCACAAAA	676	2	y	2.6e-05	+++ +++++++
chr13:80885501-80886394	676	gagcgggcgggccggcTGAGAGCTGCTCAGCGCCGGTTTAGGCCGGTCCTCTCCTGCTCCAGTCTAGTTCTTGAT TGACAGCCAGGCACTTGTTTACCACGGCGCGGCGGCCGCCGCTCGCCTCAATGAGACTGCTGAGCTGGCACAAAA	747	3	y	1.1e-06	++++++++++
chr5:105495288-105495484	1	GAGCCTGTGGAGCTGCTGTTGCCTAAACTACCCGCTGGGGGAGTGGGCGTGTCGATGATCAAGCGAAGGCTACGC	41	2	y	8.1e-05	+++ +++++ +
chr5:105495288-105495484	76	CTGAGTGACTTTCTTTAGCGCTTGCATGTCACTCATTTCTTCCTccccgccccgcccccccccccTTTGACATGA	101	3	n	2.7e-05	+++++ +++
chr5:105495288-105495484	76	CTGAGTGACTTTCTTTAGCGCTTGCATGTCACTCATTTCTTCCTccccgccccgcccccccccccTTTGACATGA	126	2	n	1.7e-07	+++++++++++
chr6:37870545-37870964	1	GAACCCGATGCCTGCTCTGGCTCCTTAACAAATGATTCCTTTACAATCTACAGAAGAGAGACACACACACAGCGA GCCAATCAGCGGCCGCGGTCCTCGCGTCCGGCGGGGCTAGCCCCGCCCACTCCCAACCTCCCGCGGGGGCCGTCC	74	1	n	2e-06	++++++++++ ++
chr6:37870545-37870964	1	GAACCCGATGCCTGCTCTGGCTCCTTAACAAATGATTCCTTTACAATCTACAGAAGAGAGACACACACACAGCGA GCCAATCAGCGGCCGCGGTCCTCGCGTCCGGCGGGGCTAGCCCCGCCCACTCCCAACCTCCCGCGGGGGCCGTCC	117	2	n	1.9e-06	+++++++ +++
chr6:37870545-37870964	151	GAGCCTCGCGGGCTTCTGCAGACCCCGCCCCCTGGGCAGGCGCGGCGGTCATTGGATGGCGCTCGGCTCGCAGTC	174	2	n	2.6e-07	++++++++++
chr6:37870545-37870964	151	GAGCCTCGCGGGCTTCTGCAGACCCCGCCCCCTGGGCAGGCGCGGCGGTCATTGGATGGCGCTCGGCTCGCAGTC	195	1	y	3.3e-05	++ + +++++ ++
chr6:37870545-37870964	226	GCCGCGGTTGCTGGGAGAGGGAGGTGGGGGCGGGGCCCGCGGTGGTCCAAGGGGCCCGAGAGAAAGGCTGCTAGG CACGGGCGGGCGCGCTGGGCGGAATCGAGCGTCTCGGTGGCGGTTTGCCTATCGGCCCGCGCGGCGGCGTCGCGG	249	2	y	7.3e-07	+ +++++++++
chr6:37870545-37870964	226	GCCGCGGTTGCTGGGAGAGGGAGGTGGGGGCGGGGCCCGCGGTGGTCCAAGGGGCCCGAGAGAAAGGCTGCTAGG CACGGGCGGGCGCGCTGGGCGGAATCGAGCGTCTCGGTGGCGGTTTGCCTATCGGCCCGCGCGGCGGCGTCGCGG	300	2	y	7.7e-05	+ +++++++
chr6:29694065-29694331	1	TCTCCCCCGCCTCTCGGAGGAGAGGGATGGCTGGCTGCTTAGTGACATGGGCCGCCGACCAATGAGAAGTCAGCC	6	2	n	1.3e-05	++++++ + +
chr6:29694065-29694331	1	TCTCCCCCGCCTCTCGGAGGAGAGGGATGGCTGGCTGCTTAGTGACATGGGCCGCCGACCAATGAGAAGTCAGCC	56	1	n	4.8e-06	++++++++ +++++
chr6:29694065-29694331	76	TCGGGCAGCCTCACCAATGGCCGTCCGGGGGGCGGGCCCGGTTTCCTGAGAGCCGGGCGGGCCAAGCTGGTCTGC	101	2	y	4.1e-07	++++++++++
chr15:82345850-82346499	1	GAGCCCTGGCGGCCCCGCCCTCTGGAGTCCGGGAGGGGCGTCCTTCTCCTGACGTCACTACGTCGTCCGGGCGCC	14	2	n	3.3e-06	+++++++ ++
chr15:82345850-82346499	76	GAGGACTTTCCCACCGGCATACGAATGCGTGCTCTGCGCAGGCGGGAGGGCGGTGCTTCCCGTGTGTGTCACGAG	111	2	y	8.1e-05	+ + ++++++
chr15:82345850-82346499	376	TCATCGTCACTCGCAGCGGCGCCATTTTGCCCAAGCCGGTGAAAGTGAGTGTCTGTCTTGAGGCGGGACGAAGGG	432	2	y	5.1e-05	+ ++++++
chr15:82345850-82346499	451	ATTGAGGCCGGTGATTGGGGGAGTGCATGTGACCTGTCCTGATTGACAGGCGCAGAGGCCAATCATAGTATTGGC	490	3	y	1.1e-06	++++++++++
chr15:82345850-82346499	451	ATTGAGGCCGGTGATTGGGGGAGTGCATGTGACCTGTCCTGATTGACAGGCGCAGAGGCCAATCATAGTATTGGC	506	1	n	2.9e-05	+++++++++ ++
chr17:17234664-17235008	1	TTGCACCCTATCACCCTGAGAGAGTTGCTCCTGTCACTCAGGATTTACTGGCCAATCACGGCATTGAGGAGGATC TGCCAGTCATAAGAGGAGGGTGGTTTTTCCGGATGCATTTTGCTGGTTCCCTGTGAGATCTGCCAGTCAAAAGCG	31	3	n	2e-06	++++++ +++
chr17:17234664-17235008	1	TTGCACCCTATCACCCTGAGAGAGTTGCTCCTGTCACTCAGGATTTACTGGCCAATCACGGCATTGAGGAGGATC TGCCAGTCATAAGAGGAGGGTGGTTTTTCCGGATGCATTTTGCTGGTTCCCTGTGAGATCTGCCAGTCAAAAGCG	49	1	n	2.6e-06	++++++++++ ++
chr17:17234664-17235008	1	TTGCACCCTATCACCCTGAGAGAGTTGCTCCTGTCACTCAGGATTTACTGGCCAATCACGGCATTGAGGAGGATC TGCCAGTCATAAGAGGAGGGTGGTTTTTCCGGATGCATTTTGCTGGTTCCCTGTGAGATCTGCCAGTCAAAAGCG	75	3	n	2.4e-05	+++ ++ +++
chr17:17234664-17235008	1	TTGCACCCTATCACCCTGAGAGAGTTGCTCCTGTCACTCAGGATTTACTGGCCAATCACGGCATTGAGGAGGATC TGCCAGTCATAAGAGGAGGGTGGTTTTTCCGGATGCATTTTGCTGGTTCCCTGTGAGATCTGCCAGTCAAAAGCG	135	3	n	2.4e-05	+++ ++ +++
chr17:17234664-17235008	151	GAGGGTGGTTCTTCCGGAACGCATTTTCCTGATTCCCTGGGGGATCTGCCAGTCATAAGAGGAGGGCGGTTTTTC	196	3	n	2.4e-05	+++ ++ +++
chr10:98914109-98915215	151	ccgACACGTCATGGAAACACAGACGTCAGAGCCCCGACGGCCAATCGGAAGCCGCCGCAGGAGGGGAAGGGAGGG	188	1	n	1.5e-06	++++++++++++++
chr10:98914109-98915215	226	GGCGACAGCGCAGGAGGGGGCGGGGGCAGCCGGGAGCCCGGCGCGCAGGGAAGGAAGAGAGGGAGGGGCGCGCGG	239	2	y	9.2e-08	+++++++++++
chr10:98914109-98915215	301	AGGCGCGAGTCGCCCGCCCCGCACTACAGGCCACCCTTTCCACACCGCGCGCTGCAAGTTCTGATCCCCGCCGCC	313	2	n	1.5e-05	++++++++ +
chr10:98914109-98915215	376	TCACCCCACCCCGGGCGCGCGCTCGCCAGGCGGGGCCGCGCTCGCCGGATCCTCCCCTTAAACGCCCTCTCCGGG	380	2	n	5.9e-05	+++ ++++
chr10:98914109-98915215	451	AAGCGCCAGTCCCGGTCCGAGCGGCGCTACCTCCGCTCGTgcgcgcgcgcgcgcccgcccgcccgcccTCAGGCT	512	2	n	1.1e-05	+++++++ +
chr10:98914109-98915215	601	agaggcagcgggagcagctgcgctgccagcgTGGAGCGGGAGGCGTGGAGGTGTGGAGAAGAAGGGAGCGTCGGA	637	2	y	9.5e-05	+++ ++++ +
chr10:98914109-98915215	751	CCTGCCCCGGAGCTGGCCGTTGCCCCTTGAGCTCCGCGTCTGCGGACCGGTGTCCCCGGACCCCGCCCCGGGTTG	812	2	n	2e-05	++++++++
chr10:98914109-98915215	826	CACCCCGCCCgttgctgctgctgttgctgctgctgcGGACGCCGGCGCGGGGCCGGTTGAGCTGCTGTGCCGAGC	829	2	n	7.1e-05	+++++++ +
chr10:98914109-98915215	901	GCGGCGCGCCCTGAGCGCGGCTTTGCGGAGCGGAGGAGGCGGGTCCTGCGGGGACGCGAGCGGCCACTcggcggc	933	2	y	1.1e-06	++++ ++++++
chr10:98914109-98915215	976	cgccgggctctgggcgggggccggccgggcgccgccTCCTCCTCCTCCGCCGCCGCCTCCTCGCGGTGCAGCGTG	983	2	y	6.5e-05	+++++++
chr17:55891918-55892226	1	TGTGCCTGAGCGGAGGCCAGGGCTGGGAACCACTGTGCTGTGACACTTCACAGCCCTCGGTGTCTAGGGGAGCTG TCACTCATGCCTCACTAGCCAATCACGGCCTCCAGATGGATCCGCTAGCCAGAATGGGGAGAGCACTTCCGTTCC	73	3	n	2e-06	++++++ +++
chr17:55891918-55892226	1	TGTGCCTGAGCGGAGGCCAGGGCTGGGAACCACTGTGCTGTGACACTTCACAGCCCTCGGTGTCTAGGGGAGCTG TCACTCATGCCTCACTAGCCAATCACGGCCTCCAGATGGATCCGCTAGCCAGAATGGGGAGAGCACTTCCGTTCC	91	1	n	9.6e-07	++++++++++ ++
chr13:47105954-47106610	226	AATCAACAAGATTTTCAAAATGGCGGTTCGGGAAGCAGAGCGGGAAGGCGCCGGCCAATCAGCGCGCGGCGCTGG	277	1	n	6.8e-07	+++++++++++ ++
chr13:47105954-47106610	301	GAGTTggcgcgcgcgggagggcgggcgggaggcggggcggcggcgTCTCTCGCGGGCTGCCCGGGCGGGGTCTCG	315	2	y	1.9e-06	+++ +++++++
chr13:47105954-47106610	301	GAGTTggcgcgcgcgggagggcgggcgggaggcggggcggcggcgTCTCTCGCGGGCTGCCCGGGCGGGGTCTCG	326	2	y	3.3e-06	+++ ++++++
chr13:47105954-47106610	376	GGGGGTCTGCGGTCCGCGGGAGGACCCGGGTCGCGGCGTCCGGCGGGTGGCTGGGTGGGTGCACGGGGTGGCGGG CGGGCGCGAGCCGGGGCCTCCGCGCTGAACGGTTGGACGCTAGGGGGCCTGCGAGCTTCCAGCCTCCCGATCCCG	424	2	y	7.1e-05	++ +++ +++
chr13:47105954-47106610	376	GGGGGTCTGCGGTCCGCGGGAGGACCCGGGTCGCGGCGTCCGGCGGGTGGCTGGGTGGGTGCACGGGGTGGCGGG CGGGCGCGAGCCGGGGCCTCCGCGCTGAACGGTTGGACGCTAGGGGGCCTGCGAGCTTCCAGCCTCCCGATCCCG	444	2	y	5.4e-05	++ +++++++
chr10:41809636-41810641	76	AGCCAACGCAAAGCCCTGCCTGCTTGGCTGTCACTCATAATTCTATCCCATTTCTACTTGGAATACTATAGAGCA	103	3	n	2e-06	++++++ +++
chr10:41809636-41810641	301	GCGCAGCAGCCGGTCTTAGTCAGTGGCGCGCTGGACTCGGGGTCCGGAGGTACTCTGCCCGAGGGCGGGGCTGCT	359	2	y	9.5e-06	+ +++++++
chr10:41809636-41810641	451	CCCGGGCGGGGACAGGGGAGGGGCTGGGGGTGAGGACCCCGTCTCCCCTCCCTGCTCCCGCCCTCTGGGCCGATC	507	2	n	3.3e-06	+++++++ ++
chr10:41809636-41810641	526	CCCACCGACGGGGCTGGGCGAAGGGGCGGGCTCTGTGCCTGGGGCCCTTTGCTTCAGCCGTGCAGCCCTGGGCTC	545	2	y	9.3e-07	++ ++++++++
chr10:41809636-41810641	601	GATGACTGCTGGATTGCGGGGTGCCCTCTGGCTTGGCGGAGGTGGGCGAGGACAGAGGAGTAAGAGGAGCATCGG	636	2	y	2e-05	+ ++ ++ +++
chr10:41809636-41810641	676	CGTACCCCGGGGGACAAGAACCGGCAGGGTTGGGGACGCCGCCCTTAGTCGCCGCTGACACTGTGATTGGCGGAC	735	1	y	2.3e-05	++ ++++++++ +
chr10:41809636-41810641	751	ACTGCTCCCCCGGAGCACCGGAGCCTCGGGCCCCAGCAGCTAAGGGCCAGGGTCTACCGCCTACCCCGCCAGCAC CCGCCCGCTGCCCTGCCGCGGCGCTAGGAGGAGCCGAGGGGGGCGGAGACTGGTGTCGGAGGAGGGCGGGGTGGG	825	2	n	3.9e-05	+++++++ ++
chr10:41809636-41810641	751	ACTGCTCCCCCGGAGCACCGGAGCCTCGGGCCCCAGCAGCTAAGGGCCAGGGTCTACCGCCTACCCCGCCAGCAC CCGCCCGCTGCCCTGCCGCGGCGCTAGGAGGAGCCGAGGGGGGCGGAGACTGGTGTCGGAGGAGGGCGGGGTGGG	885	2	y	7.7e-06	++ +++++++
chr4:133130411-133130735	1	GGACACTACCTTTGAATACGTCTTTTGCGTACTTATTTAATTGGCATTGGATTCAGACCAATGGGATAGCTGGGG	55	1	n	8.1e-05	+++++++ +++
chr4:133130411-133130735	76	GCTCCGGGCGGGTGGGGCAGGGAGCCAATCAGAACGGTTGGCGGGGTGTGGCTGCGTCCCGGGGCGGGGAAATCG	81	2	y	7.4e-05	+++ +++ +++
chr4:133130411-133130735	76	GCTCCGGGCGGGTGGGGCAGGGAGCCAATCAGAACGGTTGGCGGGGTGTGGCTGCGTCCCGGGGCGGGGAAATCG	97	1	n	2.4e-07	+++++++++++++
chr4:133130411-133130735	76	GCTCCGGGCGGGTGGGGCAGGGAGCCAATCAGAACGGTTGGCGGGGTGTGGCTGCGTCCCGGGGCGGGGAAATCG	133	2	y	2e-05	++++++++
chr4:131910783-131910991	1	tggagcgagcctaccgtccaatcagcaacccatagccactaccacactagctggcgcctctggctggcacttccg	15	1	n	2.5e-05	++ ++++++++ +
chr4:131910783-131910991	76	cagcgaggaatgtgggacccacaactgggtgctttaggtcttaattctccccccccgccccccccccccccggca	129	2	n	1.7e-07	+++++++++++
chr19:61265424-61266853	151	GTCTTCCATCTTGGTGAGGTCAATGTGCAACTGAGTGACAGAACAAGGAAGTAGAAACAGACACACAGGCACAAC	182	3	y	2e-06	+++ ++++++
chr19:61265424-61266853	451	tgaaaactaataaTAATAATAACCAATAAATGAAAAGAAAAAAGATTGTAGCTTCTGcccagctgcatgggtagc	470	1	n	5.9e-05	++++++++ + +
chr19:61265424-61266853	1051	TACAACCTCCTTGGTAGAGACTCTCTATCTCCGAGATGCACCCGCCTGCTTGCCCGACCCTGGCCGCCTCATCGC	1091	2	n	8.8e-05	++++++ ++
chr19:61265424-61266853	1276	CCGTCTCTCCCGACGGTCCTCCCTAGCTTgggggggtggggggggggcggggaaggggaaggggtgggggACGAC	1305	2	y	2.5e-06	+++++++ +++
chr19:61265424-61266853	1276	CCGTCTCTCCCGACGGTCCTCCCTAGCTTgggggggtggggggggggcggggaaggggaaggggtgggggACGAC	1316	2	y	1.7e-07	+++++++++++
chr19:61265424-61266853	1276	CCGTCTCTCCCGACGGTCCTCCCTAGCTTgggggggtggggggggggcggggaaggggaaggggtgggggACGAC	1333	2	y	8.5e-06	++ ++++ +++
chr9:40800767-40801538	76	GAACGCTGCTCTCATTGGTCCGTCGCGGAGGTACCCGCCTTCCTCCCAGGGCATCCTTCCGCCCCCTCCCGCCTG CGCTGCCGGGTCGCGCACGCGCACTCGCCGGCGACCCTCTCCCCTCCCCCAGCAGCTCTGAGTGACAGAGGACTc	83	1	y	5.4e-06	+++++ +++++++
chr9:40800767-40801538	76	GAACGCTGCTCTCATTGGTCCGTCGCGGAGGTACCCGCCTTCCTCCCAGGGCATCCTTCCGCCCCCTCCCGCCTG CGCTGCCGGGTCGCGCACGCGCACTCGCCGGCGACCCTCTCCCCTCCCCCAGCAGCTCTGAGTGACAGAGGACTc	109	2	n	2.4e-05	++++++ ++
chr9:40800767-40801538	76	GAACGCTGCTCTCATTGGTCCGTCGCGGAGGTACCCGCCTTCCTCCCAGGGCATCCTTCCGCCCCCTCCCGCCTG CGCTGCCGGGTCGCGCACGCGCACTCGCCGGCGACCCTCTCCCCTCCCCCAGCAGCTCTGAGTGACAGAGGACTc	143	2	n	8.1e-05	++++++ + +
chr9:40800767-40801538	76	GAACGCTGCTCTCATTGGTCCGTCGCGGAGGTACCCGCCTTCCTCCCAGGGCATCCTTCCGCCCCCTCCCGCCTG CGCTGCCGGGTCGCGCACGCGCACTCGCCGGCGACCCTCTCCCCTCCCCCAGCAGCTCTGAGTGACAGAGGACTc	209	3	y	2e-06	+++ ++++++
chr9:40800767-40801538	226	ccgcgcgcgggctcccggcgccccgccTTCTCCGCTCCCCCCGGGCCGTTCCCAGAGCGGGGGCGAGCGTGAAAG	247	2	n	7.7e-06	++++++ +++
chr9:40800767-40801538	301	TTCCAGAACGCCGCGGTCGTGCGTCATCGCGAGGCGGGGCGGGGAGAAGGCGGGACCTAGGCGAGCGTTCTGGCT	333	2	y	6.1e-06	++ ++++++++
chr9:40800767-40801538	301	TTCCAGAACGCCGCGGTCGTGCGTCATCGCGAGGCGGGGCGGGGAGAAGGCGGGACCTAGGCGAGCGTTCTGGCT	344	2	y	7.7e-06	+++ ++++++
chr9:40800767-40801538	376	CTTCATTAGTGCAGTCGGCAAGGGCTGGTCGTCCATTGGCTAAGAAGCTATGATCGGCAGCGGGATGGGGCGGCA	404	1	y	1.8e-05	+ + ++++++++
chr9:40800767-40801538	376	CTTCATTAGTGCAGTCGGCAAGGGCTGGTCGTCCATTGGCTAAGAAGCTATGATCGGCAGCGGGATGGGGCGGCA	426	3	y	9.2e-05	++++ + +++
chr1:23256063-23256367	1	CAGGTCCCACCTCTGGGCTCTGAGCGGTTCGCTCTTCGAGGATCAGGGCGGGTGTGTAGCCGGAGTCGCTTCCTA TTGGCCGACTTGCCGGGCGTCCGGACATCTGATTGGACGGCCCCGCCTCCCCACGGGCTGAGCTCATTGGACGGC	6	2	n	6.2e-05	+++ ++ +
chr1:23256063-23256367	1	CAGGTCCCACCTCTGGGCTCTGAGCGGTTCGCTCTTCGAGGATCAGGGCGGGTGTGTAGCCGGAGTCGCTTCCTA TTGGCCGACTTGCCGGGCGTCCGGACATCTGATTGGACGGCCCCGCCTCCCCACGGGCTGAGCTCATTGGACGGC	42	2	y	7.1e-05	+++++++
chr1:23256063-23256367	1	CAGGTCCCACCTCTGGGCTCTGAGCGGTTCGCTCTTCGAGGATCAGGGCGGGTGTGTAGCCGGAGTCGCTTCCTA TTGGCCGACTTGCCGGGCGTCCGGACATCTGATTGGACGGCCCCGCCTCCCCACGGGCTGAGCTCATTGGACGGC	69	1	y	1.1e-05	+++++ ++++++++
chr1:23256063-23256367	1	CAGGTCCCACCTCTGGGCTCTGAGCGGTTCGCTCTTCGAGGATCAGGGCGGGTGTGTAGCCGGAGTCGCTTCCTA TTGGCCGACTTGCCGGGCGTCCGGACATCTGATTGGACGGCCCCGCCTCCCCACGGGCTGAGCTCATTGGACGGC	101	1	y	2.5e-05	+ +++++++++ ++
chr1:23256063-23256367	1	CAGGTCCCACCTCTGGGCTCTGAGCGGTTCGCTCTTCGAGGATCAGGGCGGGTGTGTAGCCGGAGTCGCTTCCTA TTGGCCGACTTGCCGGGCGTCCGGACATCTGATTGGACGGCCCCGCCTCCCCACGGGCTGAGCTCATTGGACGGC	117	2	n	1.5e-06	++++++ ++++
chr1:23256063-23256367	1	CAGGTCCCACCTCTGGGCTCTGAGCGGTTCGCTCTTCGAGGATCAGGGCGGGTGTGTAGCCGGAGTCGCTTCCTA TTGGCCGACTTGCCGGGCGTCCGGACATCTGATTGGACGGCCCCGCCTCCCCACGGGCTGAGCTCATTGGACGGC	135	1	y	6.9e-05	+ ++ +++++ ++
chr1:23256063-23256367	151	GCCAGCCGAGGGGGCGGGGCGCGTTCCCCCCGGGTTCTTGAGCGAGCGCGCCGGGCCGCTGAGCCGGGCTGAGGC	158	2	y	9.2e-08	+++++++++++
chr9:64253531-64253976	76	GAGGGTGAGGGAGGGGCGGGGAAACGAGCAGGCCCCGCCCCCACGGGGGCTGCAGCGCTTCCCTCACGCCCGCCT	85	2	y	1.2e-06	++ ++++++++
chr9:64253531-64253976	76	GAGGGTGAGGGAGGGGCGGGGAAACGAGCAGGCCCCGCCCCCACGGGGGCTGCAGCGCTTCCCTCACGCCCGCCT	109	2	n	7.3e-07	+++++++++ +
chr9:64253531-64253976	151	GACTCCGCCCCCGTCGCTTCGCCGACAGCCAATGGGGACTAGCCTCAGAGGCAGATGACGCGGAAATACGTCACG	176	1	n	5.4e-06	++++++++ ++ ++
chr3:130709369-130709891	1	CTCCATGTCCCCGGCGGTAGGGCCAGCCCTCTGGCCTCCAGCCTCCCGCACCGCCCGGAAACACGCCCGCCTACT GCGCATGCGTAAGCCGAGGACCACAGGTCTGTAGAAGTCAGAAGGAGACAAGATATTCACTGTAGAAAGAAAGAA	66	2	n	1.7e-05	++++++ ++
chr3:130709369-130709891	151	ATTGCACTAACCTGataaataatatacatatttaaaaataaataataatGGTCGTTTTTAGGCTTGAGTGTGGGT	187	4	n	6.2e-05	++++++ ++
chr3:130709369-130709891	301	AAGCCACAGAAGCGGAGAGATTAGCATCCCCACTGCCCCGCCCACTTGCTGACGCCACCTACTTGAGAGCTGATT GGCTGCTGGAAACTCTTAAGTTCATAGAGCTGGAGGATGAATGAAAGTTTAGATGTGTGCTCCCTTTTAGTATTG	337	2	n	7.7e-06	+++++++ ++
chr3:130709369-130709891	301	AAGCCACAGAAGCGGAGAGATTAGCATCCCCACTGCCCCGCCCACTTGCTGACGCCACCTACTTGAGAGCTGATT GGCTGCTGGAAACTCTTAAGTTCATAGAGCTGGAGGATGAATGAAAGTTTAGATGTGTGCTCCCTTTTAGTATTG	367	1	y	3.4e-06	+ +++++++++++
chr16:31081306-31081631	76	TCTAGGGCCCCAAGCCCCGCAGCCGGCGGCGGCCATGGAGGGGGCGGGGCCGCGCTGCCCGGAGCCAATCACGAG	113	2	y	9.2e-08	+++++++++++
chr16:31081306-31081631	76	TCTAGGGCCCCAAGCCCCGCAGCCGGCGGCGGCCATGGAGGGGGCGGGGCCGCGCTGCCCGGAGCCAATCACGAG	137	1	n	1.4e-05	+++++++++ ++
chr16:31081306-31081631	151	CGTGGATACCTAAAAGGCGGGGCCAGAGCAGGCTTCGCAGCCGCCAGGTCCTAAATTCCGAGGGATTAGACCGCA	161	2	y	4.2e-05	+ ++++++
chrX:7648736-7649258	76	CCTCAGGGCGACTATGGGCAGCAAGGCTACGGCCAACAGGGTGCGCCCACCTCCTTCTCCAATCAGATGTAATCT	121	2	n	2.4e-05	+++ ++ +++
chrX:7648736-7649258	151	GGTGAGTGACAACTGGGCGGATGCGGTAGGCAGGGAGCATACAAGGAGTGAAGTTTGAAGGAACCAATAGATAGG	153	3	y	6e-05	+++ +++++
chrX:7648736-7649258	226	CAGAACCAAAAAAAAAAAAAGGTGAACTTGGTAAAACTAGCCAATGAGAGGAACCGTGAGAAGGAAGGGGACGGA	263	1	n	1.6e-07	++++++++ +++++
chrX:7648736-7649258	301	GCAGTGCTCAGAGTAACCAATGAAAGGAGTGTAGGGGCACTTGCGCAGTGGAGAATCACCAAAGTGGTGTAGGTT	314	1	n	3.4e-06	++++++++ + +++
chrX:7648736-7649258	376	TCCAGGAAGGGAAGGGGAGGAGGGTCTTTGAAATCATTGGTAAACCAATAGGCGGTAACGCCAGTAGGTGGAAGA	417	1	n	4.3e-05	+++++++ ++ ++
chr14:55559912-55561022	451	CGCAGCCAATTCCAGTCCGCTACGACTAAACGCCCCTCTTGGGTTGAGCAAGTTCCCCAGCCCACCTATCAATCA	516	3	n	5.1e-06	++ +++++++
chr14:55559912-55561022	526	CAGGTCTCAGCTATCCAATCAGAGGGCCGAGGGGGAGGGACTGCTTGGAGCGTCGAGTGACGTCAGCAGGCCTGG	537	1	n	8.2e-07	++ +++++++++++
chr14:55559912-55561022	826	AAACTGGAGGGGGTGTTAGGCTGACTTCTAACCTCATTGGCTGTTGATGCTGCCGGCCCGTGCAAGAAATTGCTC TGATTGGTCAGTAGAGGGAGGCGTGGGGGGGGTCTGAGTTCTAACGCCTCTGGTTGGTTGTGTGAGATAAGCTAG	855	1	y	2.9e-05	++ ++++++++
chr14:55559912-55561022	826	AAACTGGAGGGGGTGTTAGGCTGACTTCTAACCTCATTGGCTGTTGATGCTGCCGGCCCGTGCAAGAAATTGCTC TGATTGGTCAGTAGAGGGAGGCGTGGGGGGGGTCTGAGTTCTAACGCCTCTGGTTGGTTGTGTGAGATAAGCTAG	897	1	y	1.2e-07	++++++++++++++
chr14:55559912-55561022	976	TGAAATGCGTTCTTCCGCAAGGGGTTTTGATTGGTCAGTCGGAGAGGTTATCTGGGATTCAGCCATCCCGGGCCG	999	1	y	1.7e-06	+++ ++++++++++
chr8:126422300-126422657	1	TTCTCACCACACTCTGAGAACGGAGCTTGGTGCCGGCTCGGCCGCCTCCGCCAATTCCGGGTCCCTCTTCAGCCA ATCAGGGCAGCCGCAGCTACAGAGGGCGGTACCAATCAGATATTAGTTTCCGCCCATAGGCCACGCCCCTGGTGC	70	1	n	2.4e-07	+++++++++++ ++
chr8:126422300-126422657	151	CGGAAATTATCCGCCGGAGAAACGGACTCGGCCGGAAGTCCCGCCCTTCTATTTGCAAACGGAGGCCGGGGCAGG	190	2	n	2.2e-05	+++++++ +
chr1:59912833-59913831	1	CTCGGGGGCGGGCCTCTTTCTCTTTAAAGAGCAGAAGCAGCCTCGGGAGCCGAGATGCGCGCAGCCAATCAGCGA	2	2	y	2.1e-06	+++++++++
chr1:59912833-59913831	1	CTCGGGGGCGGGCCTCTTTCTCTTTAAAGAGCAGAAGCAGCCTCGGGAGCCGAGATGCGCGCAGCCAATCAGCGA	62	1	n	9.6e-07	+++++++++++ +
chr1:59912833-59913831	76	GGCCGAGTGGCTCGAGCGCGCTGACGCTACACCAATGAGCGGCGGCAGGGGGCGGGGACAACGGAGGAGACACTA	104	1	n	7.3e-05	++++++ ++ ++
chr1:59912833-59913831	76	GGCCGAGTGGCTCGAGCGCGCTGACGCTACACCAATGAGCGGCGGCAGGGGGCGGGGACAACGGAGGAGACACTA	121	2	y	2.6e-07	++++++++++
chr1:59912833-59913831	151	TTGTTGATGAGGAGCCGCGGCGGCGGCTGCATCACCTCGTCGGTGCCCGTCGCTGCCCGCGCGCCCCCTGGTCCT	210	2	n	8.1e-05	+ ++++++++
chr1:59912833-59913831	301	CCCGGCCGCCGTCTCTGGGGCGGGGGGACCATGTCCCAGCGGGTGAGGCGCAATGGGTCTCCCAcgcccgccggc	314	2	y	2.4e-05	++++++++
chr1:59912833-59913831	751	CCCCTGCTGGGCACCGTGTCGTCGCCCAGTTCGTCGCCCACCCACCTGTGGCCGAGCGAGGTGATTGCGGCCCCA CCCTCCGCCCGCGTCCGCCACCGGAGGAGGTCCCCAGAGCAGGGCCGACCCTCGGCGGAGAAGAGGAGCCCCAGC	787	2	n	3.7e-05	+++ +++ ++
chr1:59912833-59913831	751	CCCCTGCTGGGCACCGTGTCGTCGCCCAGTTCGTCGCCCACCCACCTGTGGCCGAGCGAGGTGATTGCGGCCCCA CCCTCCGCCCGCGTCCGCCACCGGAGGAGGTCCCCAGAGCAGGGCCGACCCTCGGCGGAGAAGAGGAGCCCCAGC	822	2	n	2.4e-05	+++ +++ ++
chr1:59912833-59913831	901	GCCCCGGTGTGCAAAGCAGGTACGTGGAGGACAGGGGTCCTGTGCCGCCGAGTGGGGACTGCAGCGCTCCggtgg ggcggggcggggcggggcggggc	971	2	y	5.3e-06	++ ++++++++
chr1:59912833-59913831	901	GCCCCGGTGTGCAAAGCAGGTACGTGGAGGACAGGGGTCCTGTGCCGCCGAGTGGGGACTGCAGCGCTCCggtgg ggcggggcggggcggggcggggc	986	2	y	6.1e-06	++ ++++++++
chr10:128303178-128303780	76	TACCTGGCTTTTTCTGATTGGCTGGGATGAGCCCGTGGCCCCCGCTGATTGGAAGCGATGGCTGCCAATCCACCG	86	1	y	2.4e-07	+++++++++++++
chr10:128303178-128303780	151	TCCGTCTTGCTTGGGTTAGGTTGAGCTAGAGGCGGGGGAGTAGTAGGGAAACTGGAATTTCCCGCGGAGCTGACG	176	2	y	2.6e-05	+ ++++++
chr10:128303178-128303780	451	CCTTACCCCCGCCCCGTTTGTGGGTAACTGGCCGTTCTTGTTACCCACCCCCTGGAGAATGCTGGGTAACCACTG	458	2	n	1.4e-05	++++++++ +
chr10:128303178-128303780	451	CCTTACCCCCGCCCCGTTTGTGGGTAACTGGCCGTTCTTGTTACCCACCCCCTGGAGAATGCTGGGTAACCACTG	494	2	n	4.7e-06	+++ ++++++
chr1:80340597-80341227	151	gagatgggggagggggcgggaggacgggaggggaggcgggaggccgcggcgggcacgtcagatctcgcgagatcg gggcgggcgcgcggtcgggggcggggtggggcgaagcccgggaagggagggcgcagggagaagtggggtctgaac	160	2	y	9.2e-08	+++++++++++
chr1:80340597-80341227	151	gagatgggggagggggcgggaggacgggaggggaggcgggaggccgcggcgggcacgtcagatctcgcgagatcg gggcgggcgcgcggtcgggggcggggtggggcgaagcccgggaagggagggcgcagggagaagtggggtctgaac	180	2	y	1.5e-06	++++ ++++++
chr1:80340597-80341227	151	gagatgggggagggggcgggaggacgggaggggaggcgggaggccgcggcgggcacgtcagatctcgcgagatcg gggcgggcgcgcggtcgggggcggggtggggcgaagcccgggaagggagggcgcagggagaagtggggtctgaac	222	2	y	3.2e-05	++++++++
chr1:80340597-80341227	151	gagatgggggagggggcgggaggacgggaggggaggcgggaggccgcggcgggcacgtcagatctcgcgagatcg gggcgggcgcgcggtcgggggcggggtggggcgaagcccgggaagggagggcgcagggagaagtggggtctgaac	240	2	y	2.1e-06	+++++++++
chr1:80340597-80341227	301	gtggtggggaggggggagaggggtggATTAAGGAATGGGCGTAGTCAGCGCCCTGGGGGGCGGGGCCTGGTGCAG	354	2	y	9.3e-07	++++++++++
chr1:80340597-80341227	376	GAGACGTAGGCTGCGTTTTCAAAAGAGGAGCGTCGGAGACCCCAGTAGGCTGAGGTGGCTTCTGATTGGTGGAGC	434	1	y	1e-05	++++++++++++ +
chr1:80340597-80341227	451	GCGAAGGTGGTGGGTCACGTGGGTAGTGGGCGGGGGAATTTCCGGAAGGGGGAGAGGGGAGTGTTGTGTTGTGGG	474	2	y	6.8e-06	++ +++++++
chr17:16951366-16951703	1	GAGAGTTGCTCCTGTCACTCAAGATTTACTGGCCAATCACGGCATCAAGGAGGATCTGTCAGTCATAAGAGGAGG	12	3	n	2e-06	++++++ +++
chr17:16951366-16951703	1	GAGAGTTGCTCCTGTCACTCAAGATTTACTGGCCAATCACGGCATCAAGGAGGATCTGTCAGTCATAAGAGGAGG	30	1	n	2.6e-06	++++++++++ ++
chr17:16951366-16951703	1	GAGAGTTGCTCCTGTCACTCAAGATTTACTGGCCAATCACGGCATCAAGGAGGATCTGTCAGTCATAAGAGGAGG	56	3	n	2.9e-06	++++++ +++
chr17:16951366-16951703	76	GTAGTTTTTCCGGATGCATTTTGCTGGTTCCCCGGGAGATCTGCCAGTCAAAAGCGGAGGGTGGTTCTTCCGGAA	116	3	n	2.4e-05	+++ ++ +++
chr19:44388527-44388844	76	CCGCAGCGCGGCTGCTGATTGGCTGCGCGGGGTCAGGCGCTGTGGGCCGAGTGAACGCGAGTGACCCCGAGGGCG GGTGCTGACCGAGAATAACCCCGGGAGGGCGTGCCTCTCTGGGTGTCCGCACCCAGGACCAGCCTCGGGCGAGCG	87	1	y	8.2e-07	++ +++++++++++
chr19:44388527-44388844	76	CCGCAGCGCGGCTGCTGATTGGCTGCGCGGGGTCAGGCGCTGTGGGCCGAGTGAACGCGAGTGACCCCGAGGGCG GGTGCTGACCGAGAATAACCCCGGGAGGGCGTGCCTCTCTGGGTGTCCGCACCCAGGACCAGCCTCGGGCGAGCG	142	2	y	9.5e-06	+ +++++++
chr19:44388527-44388844	76	CCGCAGCGCGGCTGCTGATTGGCTGCGCGGGGTCAGGCGCTGTGGGCCGAGTGAACGCGAGTGACCCCGAGGGCG GGTGCTGACCGAGAATAACCCCGGGAGGGCGTGCCTCTCTGGGTGTCCGCACCCAGGACCAGCCTCGGGCGAGCG	173	2	y	8.1e-05	+++ +++++ +
chr19:44388527-44388844	226	CGAGGGGCCAAGGTGTGGGGCTGAGGGTTCAACGCCCACCCCAGAAGAGCAGGCGGAGCTTCTGCACGGCCTCTC	260	2	n	6.5e-05	+++ ++++
chr16:62846978-62847289	1	AGTGGGACACCAGAGAAAACCCCCGCGTCGACGTGCTGACGTTCCCGAAGCTCGGAAGACCCGCCCTCGGAACCT	60	2	n	9.5e-06	+++++++ +
chr16:62846978-62847289	76	CCTACCACACGCTTCTCCAATCAGAGGCTGCAGAACTACGTCCCGGGCTTCTGAGCGGCCGAAGACTCCTTGCTC	89	1	n	1.5e-05	+ +++++++++++
chr16:62846978-62847289	151	CCCGCCCCCTGTCAAAGGGCGGAAAGAGGAAGTAGGCGTGGTCTAGAAGAAAAAGGCGGAGCTCCTAGAAAAGGG	151	2	n	2.6e-07	++++++++++
chr9:62122575-62123029	1	CAGCTCCAGCCTCTCGGCGAGGAAGCGCTCGTGTGAGGAGAGCCCGCCCGCTCGGCGCGCTACTGGGGAGCCGAG	43	2	n	2.6e-05	+++++++ +++
chr9:62122575-62123029	76	CCGCCGCCGTGCCCGCGGCTCTTCCCGCGAGATCCCAGCCACGGTAAGGGGCGAGGCCATGCCGGGGAGGAGAGG GCGGGACGGAGGCTCTTCGAATGGCAGCTCCGTCAGCCTGTTAGATTCGGTGTAGAAGGCGGGGTCACCAAGAGG	145	2	y	1.5e-06	+++ +++++++
chr9:62122575-62123029	76	CCGCCGCCGTGCCCGCGGCTCTTCCCGCGAGATCCCAGCCACGGTAAGGGGCGAGGCCATGCCGGGGAGGAGAGG GCGGGACGGAGGCTCTTCGAATGGCAGCTCCGTCAGCCTGTTAGATTCGGTGTAGAAGGCGGGGTCACCAAGAGG	203	2	y	1.9e-05	++ ++++++
chr9:62122575-62123029	226	AGGGGCCATATTAAGGGGAGGAGCTATGATGAGGGGGCGGAGAGTCCTCGAATGACAGTTCCAAAAAACCAATCA ACGGTGGCAGCGCAGAAGGCGGGACTCGCATTCTCCTGTGACCAATTGCAAAAGAGTAGAGCTAATTCTCCCCGC CTATCATCAATAAATTGCGGGCGAAGGTGTTGCTGACCCGATGTCAGTTTGCTACCTGGGCAGTTGCAGAGGTAC	291	1	n	1.6e-05	+++++++++ ++
chr9:62122575-62123029	226	AGGGGCCATATTAAGGGGAGGAGCTATGATGAGGGGGCGGAGAGTCCTCGAATGACAGTTCCAAAAAACCAATCA ACGGTGGCAGCGCAGAAGGCGGGACTCGCATTCTCCTGTGACCAATTGCAAAAGAGTAGAGCTAATTCTCCCCGC CTATCATCAATAAATTGCGGGCGAAGGTGTTGCTGACCCGATGTCAGTTTGCTACCTGGGCAGTTGCAGAGGTAC	313	2	y	1.4e-05	++ ++++++
chr9:62122575-62123029	226	AGGGGCCATATTAAGGGGAGGAGCTATGATGAGGGGGCGGAGAGTCCTCGAATGACAGTTCCAAAAAACCAATCA ACGGTGGCAGCGCAGAAGGCGGGACTCGCATTCTCCTGTGACCAATTGCAAAAGAGTAGAGCTAATTCTCCCCGC CTATCATCAATAAATTGCGGGCGAAGGTGTTGCTGACCCGATGTCAGTTTGCTACCTGGGCAGTTGCAGAGGTAC	371	2	n	5.4e-05	++++++ +
chrX:7574302-7574887	1	AGGGCCTGAAAAGGCGGGCAGCCAATGAGAAAGCCAGAACAGGGGGGTGGGGCTCCAGTGGAGCGTAGGCGGTGA	8	2	y	2.2e-05	++ ++++++
chrX:7574302-7574887	1	AGGGCCTGAAAAGGCGGGCAGCCAATGAGAAAGCCAGAACAGGGGGGTGGGGCTCCAGTGGAGCGTAGGCGGTGA	19	1	n	1.3e-06	++++++++ ++++
chrX:7574302-7574887	1	AGGGCCTGAAAAGGCGGGCAGCCAATGAGAAAGCCAGAACAGGGGGGTGGGGCTCCAGTGGAGCGTAGGCGGTGA	41	2	y	9.5e-06	++++++ +++
chrX:7574302-7574887	76	GCTAGAGACAGGTACGGCCAACAGCCAATGGACAGCCACGCGGGAGTGACGTACAGGTGATTGACAAGCAGGAGA	97	1	n	2.5e-05	++++++++ + ++
chrX:7574302-7574887	76	GCTAGAGACAGGTACGGCCAACAGCCAATGGACAGCCACGCGGGAGTGACGTACAGGTGATTGACAAGCAGGAGA	133	3	y	2.3e-05	+++++++++
chrX:7574302-7574887	151	AGCTAGCAACCAATGAGGACGCCCGCGCGTGGGCGGGATGGAAGGCGGGATGATAACGGAATCAATGGAGAGGCC	157	1	n	4.8e-06	++++++++ ++ ++
chrX:7574302-7574887	151	AGCTAGCAACCAATGAGGACGCCCGCGCGTGGGCGGGATGGAAGGCGGGATGATAACGGAATCAATGGAGAGGCC	177	2	y	6.1e-06	+ + +++++++
chrX:7574302-7574887	151	AGCTAGCAACCAATGAGGACGCCCGCGCGTGGGCGGGATGGAAGGCGGGATGATAACGGAATCAATGGAGAGGCC	189	2	y	2.2e-05	++ ++++++
chrX:7574302-7574887	376	CTGGGAGATCCGCAGGTTGCGTAGGCGGTGAGACGTAAGACAGATAAAATGAACAGCCAATGGAGAACTGCACGC	429	1	n	3.5e-05	++++++++ + +
chrX:7574302-7574887	451	GAATGATGTAGAGACAGAATGACGATAATAGTTGCAATGAGCCAATGGAGGAGTCTAGTGAGCGCACACTATGGC	489	1	n	5.2e-05	+++++++ + +
chr18:61626549-61626850	151	CGTCCTGGGCCCAAACTgaagaatgagttggcttctgggcttagccaatgggagagagggatatgattgattgat	192	1	n	1.3e-06	++++++++ ++++
chr18:61626549-61626850	151	CGTCCTGGGCCCAAACTgaagaatgagttggcttctgggcttagccaatgggagagagggatatgattgattgat	213	4	y	6.5e-05	++++++ ++
chr17:33759861-33760812	1	AACACCAGCTACAATCCTGCTTTCAACGCAGTCCGCCCGCCAAACCCAGGAAAGCCCCGCCCCTCGGGACGCCCC GCCCCAACGGCCTCTCCTACCACCTCGGGCCCCACCCCCCCAAggccccggccccgccccggcgcATCCGGGGTC	56	2	n	2.8e-06	++++++++ +
chr17:33759861-33760812	1	AACACCAGCTACAATCCTGCTTTCAACGCAGTCCGCCCGCCAAACCCAGGAAAGCCCCGCCCCTCGGGACGCCCC GCCCCAACGGCCTCTCCTACCACCTCGGGCCCCACCCCCCCAAggccccggccccgccccggcgcATCCGGGGTC	73	2	n	1.3e-05	++++++++ +
chr17:33759861-33760812	1	AACACCAGCTACAATCCTGCTTTCAACGCAGTCCGCCCGCCAAACCCAGGAAAGCCCCGCCCCTCGGGACGCCCC GCCCCAACGGCCTCTCCTACCACCTCGGGCCCCACCCCCCCAAggccccggccccgccccggcgcATCCGGGGTC	106	2	n	2.5e-06	+++ +++++++
chr17:33759861-33760812	1	AACACCAGCTACAATCCTGCTTTCAACGCAGTCCGCCCGCCAAACCCAGGAAAGCCCCGCCCCTCGGGACGCCCC GCCCCAACGGCCTCTCCTACCACCTCGGGCCCCACCCCCCCAAggccccggccccgccccggcgcATCCGGGGTC	128	2	n	1.1e-05	++++++++ +
chr17:33759861-33760812	676	AGATGGGGGAAGGCGGGACGGAACACTTGAACAATGAAGTGGATTGACAGAGTGCGTAACCAATGAGAGACTGAA	682	2	y	9.5e-06	+++ ++++++
chr17:33759861-33760812	676	AGATGGGGGAAGGCGGGACGGAACACTTGAACAATGAAGTGGATTGACAGAGTGCGTAACCAATGAGAGACTGAA	716	3	y	3.3e-05	+++++++++
chr17:33759861-33760812	676	AGATGGGGGAAGGCGGGACGGAACACTTGAACAATGAAGTGGATTGACAGAGTGCGTAACCAATGAGAGACTGAA	732	1	n	1.1e-06	++++++++ ++++
chr4:148591301-148591624	1	ggAACCCTCCCGCCGCCAGGGCCTCTCCCCACGTGGCCCGGCAGCCGGCCGCACTACCCTGCTGCGGCTGACAGA CAGCACGGCCCAACCAATCACTGCTAGTTGCAGCCCGGGGAGCCAATGAACTCCTGGTGAAGCTGCGGGCCGGCC	69	3	y	6.6e-05	+++ +++++
chr4:148591301-148591624	1	ggAACCCTCCCGCCGCCAGGGCCTCTCCCCACGTGGCCCGGCAGCCGGCCGCACTACCCTGCTGCGGCTGACAGA CAGCACGGCCCAACCAATCACTGCTAGTTGCAGCCCGGGGAGCCAATGAACTCCTGGTGAAGCTGCGGGCCGGCC	86	1	n	1.4e-05	++++++++++ ++
chr4:148591301-148591624	1	ggAACCCTCCCGCCGCCAGGGCCTCTCCCCACGTGGCCCGGCAGCCGGCCGCACTACCCTGCTGCGGCTGACAGA CAGCACGGCCCAACCAATCACTGCTAGTTGCAGCCCGGGGAGCCAATGAACTCCTGGTGAAGCTGCGGGCCGGCC	115	1	n	5.2e-05	+++++++ + +
chr4:148591301-148591624	151	CACGCCGCCATTGGAGAGCCGGGGTCCCGCCCCTCCGTAGGCCCCGCCCCCGAGCGGGTTAGGTTGCGGCGCGGG	176	2	n	1.2e-06	++++++++ ++
chr4:148591301-148591624	151	CACGCCGCCATTGGAGAGCCGGGGTCCCGCCCCTCCGTAGGCCCCGCCCCCGAGCGGGTTAGGTTGCGGCGCGGG	193	2	n	2.1e-06	+++++++++
chr4:148591301-148591624	301	TCGGCCCGCCCGCCCGCCATGGA	305	2	n	3e-05	+++++++ +++
chr4:128806987-128807088	1	CAGACCTCAGAGCCATCTGCGCGACTCCTCCTCCCGCCTCACCCTCCCCAGCCAATCAGTCACCAAGTCCTCTTG	33	2	n	1.9e-05	++++++ + ++
chr4:128806987-128807088	1	CAGACCTCAGAGCCATCTGCGCGACTCCTCCTCCCGCCTCACCCTCCCCAGCCAATCAGTCACCAAGTCCTCTTG	49	1	n	9.9e-05	+++++++++++
chr11:120572817-120573543	1	TGCAGCGGGCGGGGCAGTTGGGTTGGCGCCGCCGGGACAGCCAAGGCGACGAGAGCGCGCGTCGGTCCAGACCTC	3	2	y	3.9e-05	++ +++++++
chr11:120572817-120573543	76	GCCTTTATAAATCCTGGGCCGGGGACGCGCCCACGCCTCCCCCTCGCTGCGCGCGTCAGCCGCCGTGCGCATGCG	107	2	n	7.4e-05	+ ++++ ++++
chr11:120572817-120573543	151	CCCCGCCGCGCCCTCCGATTGGCCAAGGAGCTGAGAGACCCGCCCTCGCCGTGCGGGGACTGGACACCCACTCAA	162	1	y	4.1e-07	++++++++++++++
chr11:120572817-120573543	151	CCCCGCCGCGCCCTCCGATTGGCCAAGGAGCTGAGAGACCCGCCCTCGCCGTGCGGGGACTGGACACCCACTCAA	189	2	n	4.7e-06	+++++++ + +
chr11:120572817-120573543	226	GGCTGGGCCACCAAGTCGACAAAGACCCGGAGGCCTTTCGGTTCTTGCCTGGGATTGGCCACGGCGCGCGCGCGC	273	1	y	4.6e-05	+++ +++++++++
chr11:120572817-120573543	376	CGACTTTTCCCACGCCTTCCACACGTCTGGAATGGCTGCGGCTTTCCGCTGCCCGGCCTCGTGGCTCCTGATTGG TGGAGAGATGCGCGTACCCAGCCCGATTCTCCGTCGAACGTGGCAGTGGGCGGAGTCCCGGACCCCTGGGCGGGG	440	1	y	2.9e-05	++ +++++++++ +
chr11:120572817-120573543	376	CGACTTTTCCCACGCCTTCCACACGTCTGGAATGGCTGCGGCTTTCCGCTGCCCGGCCTCGTGGCTCCTGATTGG TGGAGAGATGCGCGTACCCAGCCCGATTCTCCGTCGAACGTGGCAGTGGGCGGAGTCCCGGACCCCTGGGCGGGG	514	2	y	5.9e-05	+++++++
chr15:76671476-76671809	1	CAACCAATCAGCTACCGGAGCTGACCCCGCCCCTGTCAATCTACAGTGGATGACTCTGTCCCTGGAGGACGCTCC	1	1	n	1.8e-05	+++++++++++
chr15:76671476-76671809	1	CAACCAATCAGCTACCGGAGCTGACCCCGCCCCTGTCAATCTACAGTGGATGACTCTGTCCCTGGAGGACGCTCC	26	2	n	1e-05	++++++++
chr15:76671476-76671809	76	TTAGGCCCCGCCCTCGCAAAACGACTCAGCCCAGCCTTCCCGCCCAGCCTTCCCGCCCAGCACCGCGGCTTCCGC	82	2	n	4.7e-06	+++++++ + +
chr15:76671476-76671809	76	TTAGGCCCCGCCCTCGCAAAACGACTCAGCCCAGCCTTCCCGCCCAGCCTTCCCGCCCAGCACCGCGGCTTCCGC	114	2	n	2.8e-05	+++++++ ++
chr15:76671476-76671809	76	TTAGGCCCCGCCCTCGCAAAACGACTCAGCCCAGCCTTCCCGCCCAGCCTTCCCGCCCAGCACCGCGGCTTCCGC	127	2	n	5.1e-05	+++++++ +
chr15:76671476-76671809	151	TCGGGACACCTCGGGCCGGAAGTGTCGCGTTGCCATGGCGAGGATGGGCGCGGGGCCCGCCCCCGTGGCGCCTGG	206	2	n	2.5e-06	+++++++++
chr18:76241172-76242049	1	AGAACAGCTCGGCGGTTTTCGCCACCCGCCCCCGCCCCCCTCCAAGCACGAGGCCCCGCCCACTCATTTGCATAG	25	2	n	4.1e-07	+++++++++ +
chr18:76241172-76242049	1	AGAACAGCTCGGCGGTTTTCGCCACCCGCCCCCGCCCCCCTCCAAGCACGAGGCCCCGCCCACTCATTTGCATAG	55	2	n	1.9e-06	+++++++ +++
chr18:76241172-76242049	76	GGCGCGCCCCTCAGCGGCCAGGACCCAGGCTGCTTCAGAGCTCTGCCAGCCCAAGCGGCTCAGACCCGGCTGGGG GCGGGCCCGGGCCGGAGCACGTGTCCATTCCGGCCTCACGACGGAGGTGGGCGAGGGCTTAGCCGCGGCGCTCCA	145	2	y	1.9e-06	+++++++++
chr18:76241172-76242049	76	GGCGCGCCCCTCAGCGGCCAGGACCCAGGCTGCTTCAGAGCTCTGCCAGCCCAAGCGGCTCAGACCCGGCTGGGG GCGGGCCCGGGCCGGAGCACGTGTCCATTCCGGCCTCACGACGGAGGTGGGCGAGGGCTTAGCCGCGGCGCTCCA	191	2	y	4.2e-05	++ ++ +++
chr18:76241172-76242049	226	CCCAGAGGCGCCGGGGCGGGGGTCTGCGGGCGTGGCACGCCGCGCGGCCTTCCGCGATCCTCCACGAGCCCGGTG	235	2	y	1.1e-05	+ ++++++++
chr18:76241172-76242049	376	ACGGGGAAGGCGGAACCAATCAGCGAGCGACGTTTCCCTTCCGATTCCAGGCCCCCGACGCGGTGCTCACACCCC	388	1	n	7.5e-06	++++++++++ +
chr18:76241172-76242049	451	GGGCTCCCCGGTCGCTGATTGGCTGCGCGCGCCGCCGGTCCCGGCCGGAGGCGGGAGTCGGcgccccgcgcctgc	462	1	y	9.6e-07	+ +++++++++++
chr18:76241172-76242049	451	GGGCTCCCCGGTCGCTGATTGGCTGCGCGCGCCGCCGGTCCCGGCCGGAGGCGGGAGTCGGcgccccgcgcctgc	495	2	y	7.7e-06	++ ++++++
chr18:76241172-76242049	601	CCGTGCGCGCCCGCTCGGCCGGCGTGCCTCACGCCTAACGGGCGGCCGCGGGCGCCAATCAGCGGGCGGCAGGGT	652	1	n	2.5e-05	+++++++++ ++
chr18:76241172-76242049	676	GCCAGCCCGGGGCTGCGCCGGCGAATCGGCGGGGTCCGCGGCTCGGGGAGGGAGGCGGGGCTACCGCGCGCGGCG	724	2	y	6.1e-06	+++ ++++++
chr10:75773378-75773702	1	GAGCCAGTAGAGGTTCCAGAAAAGGAGCgcggggaggggcggggaggaggcggggccagggaggcggggccgggg	33	2	y	1.2e-06	++ ++++++++
chr10:75773378-75773702	1	GAGCCAGTAGAGGTTCCAGAAAAGGAGCgcggggaggggcggggaggaggcggggccagggaggcggggccgggg	44	2	y	1.1e-06	++++ ++++++
chr10:75773378-75773702	1	GAGCCAGTAGAGGTTCCAGAAAAGGAGCgcggggaggggcggggaggaggcggggccagggaggcggggccgggg	58	2	y	6.1e-06	+++ ++++++
chr10:75773378-75773702	76	agggAGAGCACAGCTCTGTTTCTCATTGGCCAGGCAGACTCGGCCCTTCTAGATTGGCTATCAGAGATACGCCTC	94	1	y	1.7e-06	++++ ++++++++
chr19:11965276-11965907	1	AGAACCAATCATCTCCAATCATAGCCCTGCCTCTCCACCGACAGGTGAAAGACATAGGTGTCAGCCAATAAAAAA	12	1	n	5.9e-05	+ +++++++ +++
chr19:11965276-11965907	1	AGAACCAATCATCTCCAATCATAGCCCTGCCTCTCCACCGACAGGTGAAAGACATAGGTGTCAGCCAATAAAAAA	62	1	n	1.2e-05	++++++++ + ++
chr19:11965276-11965907	151	CAGCTGATATCAACCACCAATCCGTAAGGGCGGAAGAGGATGAAGGGCAGCGCGATGGGCGGGGGTGACGTGGCA	203	2	y	1.9e-05	+ +++++++
chr19:11965276-11965907	226	ATGACAGAAGCATAAACTGTAATGACTGACGGAAGTACTAGCCATTCGGAGGCCAAACCGGCCGTGAGCTCTGCA	248	3	y	1.6e-05	+++ ++++ +
chr19:11965276-11965907	301	TTCTCCCGTCCTCGGACTTCGGAAAGCCACCAATGATTTTGTAGCCCTGCCTGATTGGCTTTCCTGTTAGCCAAT CGAAAGCAGGCCTGGAGGACGCGTCGCGCCTTGAGCTTCTCACTGGGCGGAGTAGCATGACAGGCCCGAGAGAAA	348	1	y	9.4e-05	++++++++++
chr19:11965276-11965907	301	TTCTCCCGTCCTCGGACTTCGGAAAGCCACCAATGATTTTGTAGCCCTGCCTGATTGGCTTTCCTGTTAGCCAAT CGAAAGCAGGCCTGGAGGACGCGTCGCGCCTTGAGCTTCTCACTGGGCGGAGTAGCATGACAGGCCCGAGAGAAA	368	1	n	1.5e-06	++++++++++ +++
chr19:11965276-11965907	451	TGCCAATGTCCGCGGGGTCTTCCGCAAGTGACACTTGGCGGCACCAATCGCCGCCCTCCTTCCCGGCAGTCGAGC	491	1	n	9.9e-05	++++++++ ++
chr19:11965276-11965907	526	CCTCCTTcccgcggcggggctggcggggcggggacgctgcgcggcggcggcTGAAGCGCTAGCCGTGTTGGGCGC	547	2	y	6.1e-06	++ ++++++++
chr4:44012497-44012871	76	GCCAGCTGATTGGGCAGCTCCCGTCTTCTGATTGGCTGTTCTTTTTGTGGCTCACCAACCCAACCGGATATAGAA	78	1	y	6.6e-05	+ ++++++++ ++
chr4:44012497-44012871	76	GCCAGCTGATTGGGCAGCTCCCGTCTTCTGATTGGCTGTTCTTTTTGTGGCTCACCAACCCAACCGGATATAGAA	100	1	y	1e-07	++++++++++++++
chr4:44012497-44012871	151	GCAGGGTTTCCGCTTCCACCTTCTCCCTCTTCTCGCTCGTCCTCCGGTAGCAGCCGCCAGCACAGTGTCGGCTGC TGGGCGGGGTGTCGGCGGATCGGTCGGTTGGTTTCGGCTTCGGCGTCTCTGCGGTTGAGTTGGGCTGTCATGGCC	223	2	y	5.1e-05	+ +++++++
chr10:61695350-61695733	1	AAACCCAAGGATTCCTAGGCTGGCTAAATTAAGAGGGCGGGGAAAGGAGGATTAGCAAACGAGGAGTAGCATCAA	31	2	y	6.1e-06	++ +++++++
chr10:61695350-61695733	76	TAGCCAATCAGGACTCGGCGCTGTGCCCAACCAATAAGAGCGGTCGCTTGAGGTTTAGCCAATCGGGCTCGGCAA	76	1	n	1.6e-07	+++++++++++ ++
chr10:61695350-61695733	76	TAGCCAATCAGGACTCGGCGCTGTGCCCAACCAATAAGAGCGGTCGCTTGAGGTTTAGCCAATCGGGCTCGGCAA	103	1	n	1.7e-06	++++++++ +++++
chr10:61695350-61695733	76	TAGCCAATCAGGACTCGGCGCTGTGCCCAACCAATAAGAGCGGTCGCTTGAGGTTTAGCCAATCGGGCTCGGCAA	131	1	n	7.7e-05	+++++++++++
chr10:61695350-61695733	226	GCGGCAATGGGGACCCTCTATGAGAGTGGCGGAGCAGGCGGGCTGCGTGGTGAGCGCCTCGCGGGCCGGACAGCC	257	2	y	5.7e-05	+++ ++++++
chr3:96576838-96577055	1	GTGGCTGTGGCATGGCAAGTGCATGCAACCAATCAGCTCGAGGAAGCCTTCCTTAGAAGCCAATCAGAGGCCAGG	26	1	n	7.5e-06	+++++++++++ +
chr3:96576838-96577055	1	GTGGCTGTGGCATGGCAAGTGCATGCAACCAATCAGCTCGAGGAAGCCTTCCTTAGAAGCCAATCAGAGGCCAGG	57	1	n	3.4e-07	+++++++++++++
chr3:96576838-96577055	151	CTTCCTCCCCACCCTCCTTACTTCCTGGAAGATAACACCGCCTACCCCCTCCCCAAAGTGGAGTGAG	158	2	n	3.2e-05	+++ +++ ++
chr14:118136971-118137260	1	TTAGCAGCATGGCTGGGGAGCGCCGGGACCCGCACTGCTGCACGTCCCGCCCACCACGGCCGATGATTGGTTACT	46	2	n	8.5e-06	+++++++ ++
chr14:118136971-118137260	1	TTAGCAGCATGGCTGGGGAGCGCCGGGACCCGCACTGCTGCACGTCCCGCCCACCACGGCCGATGATTGGTTACT	60	1	y	1.4e-05	++ ++++++++++
chr14:118136971-118137260	76	GTCCCCGGCTCATGGAAGGCGATCCCGCGCCTTATTGGCCGTCAGTCTCCGGCCCCGCCCCCTAAGTCCCGCCCC GCCCTCTGCTGCCGACGTGGGCTGCAGGCCGCAGGCGGTTGCCGGGCGAGCAAACGGAGCGGGCGGCGGGCATGG	129	2	n	5.2e-07	++++++++++
chr14:118136971-118137260	76	GTCCCCGGCTCATGGAAGGCGATCCCGCGCCTTATTGGCCGTCAGTCTCCGGCCCCGCCCCCTAAGTCCCGCCCC GCCCTCTGCTGCCGACGTGGGCTGCAGGCCGCAGGCGGTTGCCGGGCGAGCAAACGGAGCGGGCGGCGGGCATGG	148	2	n	3.3e-06	+++++++ ++
chr19:46573087-46573581	76	AGCGGGATGGGGCGGGGTTCTGCTCCTCTCTACCCAAAGTGCGCAAGCGCGCCAAAGCGCCCGCCCATTGCGCAG	81	2	y	3.8e-06	++ ++++++++
chr19:46573087-46573581	76	AGCGGGATGGGGCGGGGTTCTGCTCCTCTCTACCCAAAGTGCGCAAGCGCGCCAAAGCGCCCGCCCATTGCGCAG	135	2	n	1.5e-05	+++++++ +
chr19:46573087-46573581	151	GCGGTCTCGGGAGGGGCGGGAGGGCGGGGCGGGCTGGTGAGCGACCCAGCGGGAGGTGCAAAGCCGCCCACGTGG	160	2	y	1.2e-06	++ ++++++++
chr19:46573087-46573581	151	GCGGTCTCGGGAGGGGCGGGAGGGCGGGGCGGGCTGGTGAGCGACCCAGCGGGAGGTGCAAAGCCGCCCACGTGG	173	2	y	6.1e-06	++ ++++++++
chr19:46573087-46573581	226	CTGGCCGGAGCCTGTGGCCTCTGATTGGTCGGAAGTGGGGGCGTAGGGCGAGGGGGTGGTTCCCGGGCCTAGCCG	243	1	y	8.2e-07	++++++++++++++
chr10:53596622-53597040	1	CGCCTCGCGCCCTCCTGCTTCCAccgccggccccgcccaccccacgggtcccgccccctccgtcccgccgcggcc	32	2	n	2.5e-06	+++++++ +++
chr10:53596622-53597040	1	CGCCTCGCGCCCTCCTGCTTCCAccgccggccccgcccaccccacgggtcccgccccctccgtcccgccgcggcc	50	2	n	9.2e-08	+++++++++++
chr10:53596622-53597040	76	acgcccgacgtgtggcgcggccccgccgggcgggggcggggcctgcgtcgcccctcccccgccgccggcggcctc	105	2	y	4.1e-07	+ +++++++++
chr10:53596622-53597040	301	AGGGTCAGAGCTCGGGGGCAGCCAATCGCGGGCAACGCTGCTAGTTATCAGGGCAGAATGGGCTGTAGTTTAGTG	319	1	n	9.2e-06	++++++++++ ++
chr13:34874309-34875980	451	GAACTTGGGTGAAAAAGAAAATCTTCCATGGAAAAGTTTTCCAGCACCAGCTCCTTTAGAAGTGCtttatttatt	516	4	y	8.7e-05	++ ++++++
chr13:34874309-34875980	526	ttattttttatttatttattttttggtttttcgagacagggtttctctgtgtagccctggctgtcctggaactca	532	4	y	8.7e-05	++ ++++++
chr13:34874309-34875980	901	TGGCTGTTTAAATTAGGCCAGGTCTACGAGCTCTCCGCTAGCCAATCAGCAACAAGGAGAGACACAGCAGGTTTC	939	1	n	6.8e-07	+++++++++++ +
chr13:34874309-34875980	1126	TCCCCACGGCCCGCCCCCTAGCCCCGGAAGTTACGTTCCGCGCCCCGCCCCCGGACGCCGAGTTTTTCTATCCGG	1135	2	n	5.2e-07	++++++++++
chr13:34874309-34875980	1126	TCCCCACGGCCCGCCCCCTAGCCCCGGAAGTTACGTTCCGCGCCCCGCCCCCGGACGCCGAGTTTTTCTATCCGG	1169	2	n	1.5e-06	+++++++++
chr13:34874309-34875980	1426	GCCGGCAATGCGGGGGACGGCGGCGGCGGCGACCTGCGCGACGGGCGGGAAAGTTCAGGCCTAACGGCGACAGCC	1464	2	y	7.7e-05	+ +++++++
chr13:34874309-34875980	1501	AAACTTTGCCTTGCCGCGCGCCGTGGGTGGTGCGGCGGGAGGCGTGGGAGCGGCCTGGGCTTTGCTGCCGGTGGG	1536	2	y	9.5e-05	+++ ++++ +
chr3:95882042-95882611	1	ACGGTCGCGCCTGCCAGGTGATGCAATACCTCCCAACACCCCGATCTGCGGTCTTCCATGCCCACCCCATCCGGG	61	2	n	2.2e-05	+++ ++++ ++
chr3:95882042-95882611	151	CTTCACTGTCTGTGCTGGTCTAGCCGACCCACCTCCGCCTCACTCTGTGGGTCCCGCCCCTTCCCCCTCCCAGAC	178	2	n	2e-05	+++ ++ ++ +
chr3:95882042-95882611	151	CTTCACTGTCTGTGCTGGTCTAGCCGACCCACCTCCGCCTCACTCTGTGGGTCCCGCCCCTTCCCCCTCCCAGAC	203	2	n	9.3e-07	++++++++ ++
chr3:95882042-95882611	226	ACGTGCGGTTCTGCACGTGCCTCCCCCTGCGTACACAGACCTTGTGCTCTCATTGGATAGCTTACCGGCAACACG	271	1	y	1.7e-06	+++++ +++++ ++
chr3:95882042-95882611	301	TGACTCTAGATGCAGACGCTCACAGCCCATTTGCTACGGCACGCGGGGGCTCGGCCAATAGAGAGGCAGCCAAGT GGTGATTGGCTGGAAGGGAAGCAGTCCATGCTCCGCCCGTACATGCGGCTCCTCGGGTGATAAAAAAGGAGGATG	352	1	n	6.6e-05	++++++++ + ++
chr3:95882042-95882611	301	TGACTCTAGATGCAGACGCTCACAGCCCATTTGCTACGGCACGCGGGGGCTCGGCCAATAGAGAGGCAGCCAAGT GGTGATTGGCTGGAAGGGAAGCAGTCCATGCTCCGCCCGTACATGCGGCTCCTCGGGTGATAAAAAAGGAGGATG	374	1	y	2.6e-06	++ ++++++++++
chr19:8897929-8898274	1	CTGAGAACGCAGAGCCCGGGGCGTCGAGGCACGCCCCATTCATAATAAAGAACGCGCTCGACCAATGGGATAGAC	59	1	n	4.9e-05	++++++++ +++
chr19:8897929-8898274	76	GTCCGGCCGCGCTCTGGACGAGCCAATCGGAAGGCCGGAAGGGGCGGGCACTAGGGTACGTGGCTCAACGTGCAC AGGGGCGGGTAGGTTCGGGTCAAGGAGCAAACCCGGTACAAGATGGCGGCAATAGCGGCAGTGGCGGCGCGTAGG	95	1	n	2e-06	+++++++++++++
chr19:8897929-8898274	76	GTCCGGCCGCGCTCTGGACGAGCCAATCGGAAGGCCGGAAGGGGCGGGCACTAGGGTACGTGGCTCAACGTGCAC AGGGGCGGGTAGGTTCGGGTCAAGGAGCAAACCCGGTACAAGATGGCGGCAATAGCGGCAGTGGCGGCGCGTAGG	113	2	y	9.3e-07	++ ++++++++
chr19:8897929-8898274	76	GTCCGGCCGCGCTCTGGACGAGCCAATCGGAAGGCCGGAAGGGGCGGGCACTAGGGTACGTGGCTCAACGTGCAC AGGGGCGGGTAGGTTCGGGTCAAGGAGCAAACCCGGTACAAGATGGCGGCAATAGCGGCAGTGGCGGCGCGTAGG	149	2	y	1e-05	++++++++
chr16:36828201-36828662	76	GTGCGGCCGCCCCTTGGAGCGCCCCGAGTCTTGATTGGCTGTCTGGAGACAcctgccccgcccctcgccccaggg	103	1	y	2.6e-06	++ ++++++++++
chr16:36828201-36828662	76	GTGCGGCCGCCCCTTGGAGCGCCCCGAGTCTTGATTGGCTGTCTGGAGACAcctgccccgcccctcgccccaggg	132	2	n	2.8e-06	++++++++ +
chr16:36828201-36828662	151	ccccgccccgcccctggccaccatccccgcccctagcccccttcccgcGTCGCGACGCACACAGCTCGGCGGAGA	152	2	n	6.1e-06	++++++++ ++
chr16:36828201-36828662	151	ccccgccccgcccctggccaccatccccgcccctagcccccttcccgcGTCGCGACGCACACAGCTCGGCGGAGA	176	2	n	8.5e-06	++++++++
chr16:36828201-36828662	301	CCGAGATGGCGGCTGGGATGGAGGAAAGGCCCTAGGGGGGCGGGGAAGCTAGGACGCCAGACACCCAGGGCAGAA	334	2	y	1.1e-06	++++++++++
chr7:48788853-48789185	1	GGGGCTGAAGGAAAGAACATAGCGGGGGCGGGGCAGGGGGCGGGGATGACCGGCAGTTCTCTAGAGGTGAGAAAG	22	2	y	4.1e-07	+ +++++++++
chr7:48788853-48789185	1	GGGGCTGAAGGAAAGAACATAGCGGGGGCGGGGCAGGGGGCGGGGATGACCGGCAGTTCTCTAGAGGTGAGAAAG	34	2	y	2.6e-07	++++++++++
chr7:48788853-48789185	76	TCCCGCCCCCGTGAGAGAGAGATCGGGGATTGGCTTCTCGTGGCGGATTGACAGCCCTAGGATGCGCGCAGTTAG	77	2	n	2.5e-06	+++++++++
chr7:48788853-48789185	76	TCCCGCCCCCGTGAGAGAGAGATCGGGGATTGGCTTCTCGTGGCGGATTGACAGCCCTAGGATGCGCGCAGTTAG	120	3	y	3.3e-05	+++++++++
chr1:120121016-120121345	1	CACAGAGCGCACCAGCTAGCGCCTTTAAAAGCACAACCCCGGCGTTCCAACTGAGCTCGGGCGAGCGGCAGCAGC CAATCAGAAGTCGGATCTGCTTTCGGGGGCGTGTCCATCCTAGCGGAGCGCTCCAACCCTTCCCGGACCCAAGAG	72	1	n	1e-07	++++++++++++++
chr1:120121016-120121345	1	CACAGAGCGCACCAGCTAGCGCCTTTAAAAGCACAACCCCGGCGTTCCAACTGAGCTCGGGCGAGCGGCAGCAGC CAATCAGAAGTCGGATCTGCTTTCGGGGGCGTGTCCATCCTAGCGGAGCGCTCCAACCCTTCCCGGACCCAAGAG	98	2	y	8.4e-05	+++++++ +
chr12:83487729-83488035	1	ATTGTCTGTCTCAGAGTTCTAAAGGTTCGCTCAGGGGAAGCGGCAGGCCAATCAGAGCACGGGATACCGGCCTAC	45	1	n	4.8e-07	+++++++++++++
chr12:83487729-83488035	76	CGGCCAATCGGCGCGGCTGGTCGCCAAGTGGGCGGGGCCTGCGTGGTGGTAGTTATTAGGGGAGCTGTCAAAGCC	76	1	n	2.3e-06	+++++++++++ ++
chr12:83487729-83488035	76	CGGCCAATCGGCGCGGCTGGTCGCCAAGTGGGCGGGGCCTGCGTGGTGGTAGTTATTAGGGGAGCTGTCAAAGCC	101	2	y	7.7e-06	++ +++++++
chr6:142386964-142387380	76	GTAAAAACCTTCCCGCCGCCCGGCATGCAGCGCCCACCCTTCCGGATCAGCCCCCTCCACCAATCACAAGCCATT	108	2	n	3.4e-05	+++ +++ ++
chr6:142386964-142387380	76	GTAAAAACCTTCCCGCCGCCCGGCATGCAGCGCCCACCCTTCCGGATCAGCCCCCTCCACCAATCACAAGCCATT	132	1	n	3.1e-05	+ ++++++++ +++
chr6:142386964-142387380	151	GCCTTCTCTGATTGGCTGCGTGGTGCGGCGTCCGGGTGCACATCCGAACAAGAGCGCGTGCTATTGGTCTCGCTG	155	1	y	1.2e-07	+++++++++++++
chr7:89404215-89404491	1	AGAGGATCAAGCCGCGGGCGGGGGCCTGACCCTTACAGCAGGAGAGGAGCCCCGCCCCTTCCCGCCCCCTCTGAC	12	2	y	6.2e-05	+ +++++++
chr7:89404215-89404491	1	AGAGGATCAAGCCGCGGGCGGGGGCCTGACCCTTACAGCAGGAGAGGAGCCCCGCCCCTTCCCGCCCCCTCTGAC	61	2	n	9.2e-08	+++++++++++
chr7:89404215-89404491	76	CAGGGGGGGCTTTCATTGGACAGTCGCGTTGTCCGTCCCGCCCCGCCCCCGCCCTGCGAACCTCCAGCGCCACAG	84	1	y	1.5e-05	+++ + +++++ ++
chr7:89404215-89404491	76	CAGGGGGGGCTTTCATTGGACAGTCGCGTTGTCCGTCCCGCCCCGCCCCCGCCCTGCGAACCTCCAGCGCCACAG	117	2	n	4.1e-07	+++++++++ +
chr7:89404215-89404491	151	AGCGCTGGGGCGGTGAGAACAGCGCGGCGTAGAGTGCAGGCGGGCTTCGCCGAAAAGCCGGACTCGGCCGGCGCC	184	2	y	8.8e-05	+ + ++++++
chr16:94569333-94569803	226	AACGGAATCTGCCGTTACCCGAGCAACAGGCCCCGCCCGCCGGCTTGGGGCCGGGAGGGGCGGGCGGAGGACGTC	257	2	n	4.5e-05	+++++++ ++
chr16:94569333-94569803	226	AACGGAATCTGCCGTTACCCGAGCAACAGGCCCCGCCCGCCGGCTTGGGGCCGGGAGGGGCGGGCGGAGGACGTC	279	2	y	1.2e-06	++ ++++++++
chr16:94569333-94569803	301	AGCACGTCAGCCGGGGTTTTGCGTTTTGATTGACAGTTGCTATAGCGACCGGGTCGGTCCGTCGCCATTTTGTTG	327	3	y	1.1e-06	++++++++++
chr16:94569333-94569803	376	GTTGGTTTTTTTTTAAACCCTTTCGCTTCCCGCCCGAATAATAATAAAAAGCCCCATTGGAGTGAGGCGGGGGTG	436	2	y	3.9e-05	+ + ++++++
chr2:148672448-148672785	1	AGCGCGTTGACTCCACCCTCTCCACAACATCCAATCAGAGCTCCCTCAACCGGATCTTCTAGGATAGTGCCTAAC	28	1	n	8.2e-07	++ +++++++++++
chr2:148672448-148672785	151	CGGGGAGGCGGGAGTCGACGGGAACCGGGATGCTAGCGCCTGCGCACATTGCAGCTTGCGGCGCGCGGGAAGCCA	152	2	y	1.5e-06	++++ ++++++
chrX:93632116-93632403	1	GATAGTCTCTCTATTCCGCGCCAACCAGCCTGAAACTGGCGCGGAGGCCAAGATAGGCGCCAGTACGAAAGCCAA TCAGCGGCCTGGAAGACTGCGGACTTCCGCCCGGAAGGCCACTGACGTGCGGCGCTGAGCCGCGCCCCGCCCCCG GCCTTCCCGCGGGAGTGCATTTGGCGCCCTGTGATGACCCCTGAGCGAAAAGCGGGAACCTCGGCGAGGACCGGG	69	1	n	2e-06	++++++++++ ++
chrX:93632116-93632403	1	GATAGTCTCTCTATTCCGCGCCAACCAGCCTGAAACTGGCGCGGAGGCCAAGATAGGCGCCAGTACGAAAGCCAA TCAGCGGCCTGGAAGACTGCGGACTTCCGCCCGGAAGGCCACTGACGTGCGGCGCTGAGCCGCGCCCCGCCCCCG GCCTTCCCGCGGGAGTGCATTTGGCGCCCTGTGATGACCCCTGAGCGAAAAGCGGGAACCTCGGCGAGGACCGGG	141	2	n	1.5e-06	+++++++++
chr16:96127792-96128298	1	CCAGCCTCCATTGGCTGTCTAGGCCCACCGCGCGCGCCAGCGCCCCAGCCCTTGCTCCCGAATAGGCACGGCGAG	4	1	y	1.4e-05	++ + ++++++++
chr16:96127792-96128298	76	CTGTCACTCCGCCGCATcgccccgccccctggccccccacccctgcgggcgcgaccccggccgaggggcgggccg	76	3	n	9.6e-05	++++++ ++
chr16:96127792-96128298	76	CTGTCACTCCGCCGCATcgccccgccccctggccccccacccctgcgggcgcgaccccggccgaggggcgggccg	96	2	n	2.6e-07	++++++++++
chr16:96127792-96128298	76	CTGTCACTCCGCCGCATcgccccgccccctggccccccacccctgcgggcgcgaccccggccgaggggcgggccg	111	2	n	1.9e-05	+++ ++++ +
chr16:96127792-96128298	76	CTGTCACTCCGCCGCATcgccccgccccctggccccccacccctgcgggcgcgaccccggccgaggggcgggccg	137	2	y	2.8e-06	+ ++++++++
chr16:96127792-96128298	151	gAGTCGCCCGACCCCGCTAGGTAGTTTGTTTGAAGCCGACAGCAAAAGTGCGGCCTGCGCGCTGATAAGTGGGGG CGTGTCACGTGGCCTCAGCATCGCTTTCCCACAATGCTCCGGACCCCAGGCGCCCGCCCGCGGAGTCCACCCGCG	219	2	y	6.2e-05	+ +++++++ +
chr16:96127792-96128298	151	gAGTCGCCCGACCCCGCTAGGTAGTTTGTTTGAAGCCGACAGCAAAAGTGCGGCCTGCGCGCTGATAAGTGGGGG CGTGTCACGTGGCCTCAGCATCGCTTTCCCACAATGCTCCGGACCCCAGGCGCCCGCCCGCGGAGTCCACCCGCG	278	2	n	6.2e-05	+++++++ +
chr11:106036654-106037044	1	ATCCCCTTGACTGACATCTTGGGTAGCCAATGATCTTTGGGACTTCAAAAGAGCCCGCCTCCAGGAGCTGGGCGG GGCTAATGAGCAGAATGACAAACATTTTCACCAATAGTAAGGAGGGCGCGGGCGCTACAACTGTGTCGACCAATG AAAAGAAGGAACAGTTTGGAAAGGACGTACCCGGCAGCCAACGCTCGTCGCCGCTGCGGGGTCGCGTGGCTTCCG	8	3	y	3e-05	+++ +++++
chr11:106036654-106037044	1	ATCCCCTTGACTGACATCTTGGGTAGCCAATGATCTTTGGGACTTCAAAAGAGCCCGCCTCCAGGAGCTGGGCGG GGCTAATGAGCAGAATGACAAACATTTTCACCAATAGTAAGGAGGGCGCGGGCGCTACAACTGTGTCGACCAATG AAAAGAAGGAACAGTTTGGAAAGGACGTACCCGGCAGCCAACGCTCGTCGCCGCTGCGGGGTCGCGTGGCTTCCG	24	1	n	8.5e-05	++++++++ +
chr11:106036654-106037044	1	ATCCCCTTGACTGACATCTTGGGTAGCCAATGATCTTTGGGACTTCAAAAGAGCCCGCCTCCAGGAGCTGGGCGG GGCTAATGAGCAGAATGACAAACATTTTCACCAATAGTAAGGAGGGCGCGGGCGCTACAACTGTGTCGACCAATG AAAAGAAGGAACAGTTTGGAAAGGACGTACCCGGCAGCCAACGCTCGTCGCCGCTGCGGGGTCGCGTGGCTTCCG	54	2	n	9.5e-06	++++++ ++
chr11:106036654-106037044	1	ATCCCCTTGACTGACATCTTGGGTAGCCAATGATCTTTGGGACTTCAAAAGAGCCCGCCTCCAGGAGCTGGGCGG GGCTAATGAGCAGAATGACAAACATTTTCACCAATAGTAAGGAGGGCGCGGGCGCTACAACTGTGTCGACCAATG AAAAGAAGGAACAGTTTGGAAAGGACGTACCCGGCAGCCAACGCTCGTCGCCGCTGCGGGGTCGCGTGGCTTCCG	66	2	y	5.4e-05	+ +++++++
chr11:106036654-106037044	1	ATCCCCTTGACTGACATCTTGGGTAGCCAATGATCTTTGGGACTTCAAAAGAGCCCGCCTCCAGGAGCTGGGCGG GGCTAATGAGCAGAATGACAAACATTTTCACCAATAGTAAGGAGGGCGCGGGCGCTACAACTGTGTCGACCAATG AAAAGAAGGAACAGTTTGGAAAGGACGTACCCGGCAGCCAACGCTCGTCGCCGCTGCGGGGTCGCGTGGCTTCCG	142	1	n	1.6e-05	++++++++ + +++
chr11:106036654-106037044	226	TTCCGAGAGGGCGGGCCGGCATCCCAAACGGAAGGTGGTAGCGCTGCCCGAGCTGGTTTGAAACTGGTGGTCGGG	230	2	y	1.5e-06	+++ +++++++
chr11:106036654-106037044	301	CCCGGCCGAGTGTGAGTGTGTGTAGCCGAGGACCCGCTGGAGGGCTAGGCCGTTCTTGACCGCCCCGGCCCCGCC TCCCCTCGGACCCGC	370	2	n	1.5e-06	++++++ ++++
chr3:108911172-108911988	226	CTGCGGTTGCGAGTTGCCGGTCAGCGCGGGGCTGTTGTTGGCCATGGTGCCGCGGCAGGAAGGAAGGAGGGCGGG	290	2	y	7.7e-06	++ +++++++
chr3:108911172-108911988	451	CCCGAGACGGACGCCAAAAACGAGGCGGGGAGAACTCCGGACGCAAAGCAGAACGGGCAGCAGAGGAGCTCGATC	469	2	y	3.7e-05	+ + ++++++
chr3:108911172-108911988	601	AAGGCCGTGGCCAATCAGAGCCGCCCGTGTGTGCAGGCTATTCCTCTTCCTGGTTGCGCGAGGTCGTTGCGTGTT	608	1	n	2.1e-08	++++++++++++++
chr11:43426174-43426456	1	CACGACGAGCTCACAGCTAAACTCACCGAAGACTGCGCCACCAACGACCCGGCACACCGCAGTTTAAACTGTAAC TCAATTGGTCCCTCCGAGAGGAGGTGGGGCCTACAGCCTGAGAACCAATGGGAGCAACGGAAGTTTTCAGCCACC	69	3	n	3.5e-05	++++ + +++
chr11:43426174-43426456	1	CACGACGAGCTCACAGCTAAACTCACCGAAGACTGCGCCACCAACGACCCGGCACACCGCAGTTTAAACTGTAAC TCAATTGGTCCCTCCGAGAGGAGGTGGGGCCTACAGCCTGAGAACCAATGGGAGCAACGGAAGTTTTCAGCCACC	93	2	y	9.5e-06	++++ ++ +++
chr11:43426174-43426456	1	CACGACGAGCTCACAGCTAAACTCACCGAAGACTGCGCCACCAACGACCCGGCACACCGCAGTTTAAACTGTAAC TCAATTGGTCCCTCCGAGAGGAGGTGGGGCCTACAGCCTGAGAACCAATGGGAGCAACGGAAGTTTTCAGCCACC	117	1	n	6.1e-06	+++++++ +++++
chr2:132578076-132578482	151	CCCCGCGGGGCGGGGTCGAAGGGCGGCGGGGCGGGGCCTGACGTCACGCCCGGTCCGGTCCTGGCCAATcggcgg	154	2	y	1.1e-05	+ ++++++++
chr2:132578076-132578482	151	CCCCGCGGGGCGGGGTCGAAGGGCGGCGGGGCGGGGCCTGACGTCACGCCCGGTCCGGTCCTGGCCAATcggcgg	175	2	y	6.1e-06	++ ++++++++
chr2:132578076-132578482	151	CCCCGCGGGGCGGGGTCGAAGGGCGGCGGGGCGGGGCCTGACGTCACGCCCGGTCCGGTCCTGGCCAATcggcgg	212	1	n	2.3e-06	+++++++++++ ++
chr2:132578076-132578482	226	ccgcgcgccggggggcgggcTGCGTGTTCCTGGAAGGGCTGCCCAGAGACCTGAGGTGGCCCGACAGCCTTAGCC	234	2	y	4.1e-07	++++++++++
chr10:72654689-72655060	76	CCGCCTACGCTTGCGTACGGGGGCGGGACCGGAATCGACTCCGGCCAATGAAAAGAGGTGACGTCATTTAAAGTC	92	2	y	2.5e-06	+++++++++
chr10:72654689-72655060	76	CCGCCTACGCTTGCGTACGGGGGCGGGACCGGAATCGACTCCGGCCAATGAAAAGAGGTGACGTCATTTAAAGTC	117	1	n	8.3e-06	++++++++ + +++
chr10:72654689-72655060	151	CTGCCCACTTACCCAGAAACCAATCTCGACCTAGGCGGGCAGTCCAGGAGAATCCAAAGGCGTGGTGAGCGACAG	216	3	y	4.1e-05	+++ +++++
chr7:75782060-75782383	76	TCCCGCCCCATTTTATGGTTCCTAAGCACAAAAGCCAATCAGAGGCCGTAGATTTGTGACGGATGGCCCGACGAA	77	2	n	1.3e-05	++++++++ +
chr7:75782060-75782383	76	TCCCGCCCCATTTTATGGTTCCTAAGCACAAAAGCCAATCAGAGGCCGTAGATTTGTGACGGATGGCCCGACGAA	107	1	n	3.4e-07	+++++++++++++
chr7:75782060-75782383	151	CCCATACTACAGCTGCATTTGGAGGAAGGGGTGGGCTGCCCCAGCCTCTGGTCCAGCGAGGGGCCGGGAGGGGAA	175	2	y	8.5e-06	++ ++++ +++
chr8:83332405-83332749	76	GGCTGCGGGGGCGGGGTGTCTCTTGGCTCCGCGCCCCGCCTCTTCGTCTTCTTCCGATTGGCTCGCTCTCAGCCT	80	2	y	4.1e-07	+ +++++++++
chr8:83332405-83332749	76	GGCTGCGGGGGCGGGGTGTCTCTTGGCTCCGCGCCCCGCCTCTTCGTCTTCTTCCGATTGGCTCGCTCTCAGCCT	110	2	n	5.3e-06	++++++ + ++
chr8:83332405-83332749	76	GGCTGCGGGGGCGGGGTGTCTCTTGGCTCCGCGCCCCGCCTCTTCGTCTTCTTCCGATTGGCTCGCTCTCAGCCT	126	1	y	2e-06	+++++++++++++
chr7:28766397-28766914	76	CTCTGCGATGAGCTCCAGTGCTTCCGCCCTATCGGGAATTCCCCAACACGCCCCCTCATATACCCAATCAAAATG	122	2	n	3.4e-05	+ +++++++++
chr7:28766397-28766914	76	CTCTGCGATGAGCTCCAGTGCTTCCGCCCTATCGGGAATTCCCCAACACGCCCCCTCATATACCCAATCAAAATG	136	1	n	2.5e-05	++ +++++++ ++
chr7:28766397-28766914	151	TTTTAAATAGCTACACCCCGCCCCTGTACTGCACCACAGCCAATCAGAAAAATGAGGTGGACATTCGCTCGCTGA	167	2	n	1e-05	++++++++
chr7:28766397-28766914	151	TTTTAAATAGCTACACCCCGCCCCTGTACTGCACCACAGCCAATCAGAAAAATGAGGTGGACATTCGCTCGCTGA	187	1	n	2.4e-07	+++++++++++++
chr7:28766397-28766914	376	TCTCGGCCTCTTCTTGTTTCCGCTGCCGTCACGGGACAGAGCAGTCGGTGACAGTCCCGAGGGCCCCCACCCCGT TCCCATGGCCGAGCCGGACCGTGAGTTAGGGGCCCTGTTGGGAGGGTGGGAGGGTCGGGCCGCGCCG	441	2	n	4.8e-05	+++ ++++ +
chr7:28766397-28766914	376	TCTCGGCCTCTTCTTGTTTCCGCTGCCGTCACGGGACAGAGCAGTCGGTGACAGTCCCGAGGGCCCCCACCCCGT TCCCATGGCCGAGCCGGACCGTGAGTTAGGGGCCCTGTTGGGAGGGTGGGAGGGTCGGGCCGCGCCG	490	2	y	1.4e-05	+++ +++ +++
chr2:127831860-127832121	1	CACTTGTGATGTCGAACGTGGGCAGCGCGCCTGACTATTGGTCTCCGCTGCGGGAGAGCTGGCCAATCGCTGCGG	60	1	n	1.8e-05	++++++++++ ++
chr2:127831860-127832121	76	CCGTTGCTGGGAGACAAAGTCCCGCCTCCGTCCCCGCCCCCTCCGTCCCTAGCCCGCAGTTCTTTTCATTTGCCT	96	2	n	1.1e-05	++++++ ++
chr2:127831860-127832121	76	CCGTTGCTGGGAGACAAAGTCCCGCCTCCGTCCCCGCCCCCTCCGTCCCTAGCCCGCAGTTCTTTTCATTTGCCT	108	2	n	9.2e-08	+++++++++++
chr12:8640766-8641286	226	GTCTGTGCACGCGCTCTGCTTGAGAGTGCTGGTCTGTGGCGGGAAGTCCCGCCCACTCCGCTGTGATTGACGGCA	273	2	n	1.9e-06	+++++++ +++
chr12:8640766-8641286	226	GTCTGTGCACGCGCTCTGCTTGAGAGTGCTGGTCTGTGGCGGGAAGTCCCGCCCACTCCGCTGTGATTGACGGCA	289	3	y	3.8e-06	++++++++ +
chr12:8640766-8641286	301	GCAGCTTCCAATCGGGAAGCTTCCCCACTCACTGTTTCCAGGAGCAGGGAACAGCGCCAGAAGTCCCGCCCGCCC	365	2	n	3e-05	+++++++ +++
chr12:8640766-8641286	376	GACCGTGACTGACAGCCCCAGAGACTGAAAccgcccccccccgccccccgcAGAGAGATCCGCGTCTGCAAAGAC AAGGGCGGGCGGCCGTGATTTTTATATAAAATaaaaaaagtctcgtgtgcttatcgtgtgggagctcacg	381	3	y	2.9e-06	+++ ++++++
chr12:8640766-8641286	376	GACCGTGACTGACAGCCCCAGAGACTGAAAccgcccccccccgccccccgcAGAGAGATCCGCGTCTGCAAAGAC AAGGGCGGGCGGCCGTGATTTTTATATAAAATaaaaaaagtctcgtgtgcttatcgtgtgggagctcacg	415	2	n	4.1e-07	++++++++++
chr12:8640766-8641286	376	GACCGTGACTGACAGCCCCAGAGACTGAAAccgcccccccccgccccccgcAGAGAGATCCGCGTCTGCAAAGAC AAGGGCGGGCGGCCGTGATTTTTATATAAAATaaaaaaagtctcgtgtgcttatcgtgtgggagctcacg	449	2	y	3.4e-05	+++++++
chr16:98081966-98082656	1	CATTCAAGCTGGCTCAGCTACTAAGTGAAACCCGCACCACGGCAACCGGAAAGCCCGCCTTCTCTTCTGACTGGC AGGTCCGCCTAAAGGCTCTGACTGGCCAGTAAGTCTGGAGCACCTCCGTTAGAGTTAAGAGTTAGCTGAAGGTAC	54	2	n	7.7e-06	++++++ +++
chr16:98081966-98082656	1	CATTCAAGCTGGCTCAGCTACTAAGTGAAACCCGCACCACGGCAACCGGAAAGCCCGCCTTCTCTTCTGACTGGC AGGTCCGCCTAAAGGCTCTGACTGGCCAGTAAGTCTGGAGCACCTCCGTTAGAGTTAAGAGTTAGCTGAAGGTAC	68	3	y	2.4e-05	+++ ++ +++
chr16:98081966-98082656	451	CAAGTCTGCTCAGCAACTAAGTGAAATTCGCGCCAAGGCATCCGGAAAAACCCGCCTTCCCTTCTGACTGGCAAG	501	2	n	9.5e-06	++++++ +++
chr16:98081966-98082656	526	TCAGCCTAAAGGATCTGATTGGCCAATAAGTCTTGAGTGACTCGAGCACCTCCCTTAAAGGTACATTGCGTAGAG	537	1	y	9.6e-07	+ ++++++++++++
chr5:136083793-136084071	1	CCAGCAGCTACACTTCGGGGCAGGCCCCGCCCGCCCTCCCTTCCAGGTGGCCAATGAGGGACGCAAGCCGCATAG	30	2	n	1.9e-06	+++++++ +++
chr5:136083793-136084071	1	CCAGCAGCTACACTTCGGGGCAGGCCCCGCCCGCCCTCCCTTCCAGGTGGCCAATGAGGGACGCAAGCCGCATAG	48	1	n	5.4e-06	++++++++ ++ +
chr5:136083793-136084071	76	GCCGCGCCCATTCTGGGCATCCAGGACGCTGATTGGTCCTTCCATGCAGTGTCTCCCCGCCCCCGCAGGAGGGGC GGGGAGGGGTGAATGGAGTAGCGGAGATCCCTCAGCCCCAGCGCTCCCCTCTCTGGCCTCCGCACCCGCCTGCCT	101	1	y	1.8e-05	+ ++++++++++
chr5:136083793-136084071	76	GCCGCGCCCATTCTGGGCATCCAGGACGCTGATTGGTCCTTCCATGCAGTGTCTCCCCGCCCCCGCAGGAGGGGC GGGGAGGGGTGAATGGAGTAGCGGAGATCCCTCAGCCCCAGCGCTCCCCTCTCTGGCCTCCGCACCCGCCTGCCT	131	2	n	4.1e-07	+++++++++ +
chr5:136083793-136084071	76	GCCGCGCCCATTCTGGGCATCCAGGACGCTGATTGGTCCTTCCATGCAGTGTCTCCCCGCCCCCGCAGGAGGGGC GGGGAGGGGTGAATGGAGTAGCGGAGATCCCTCAGCCCCAGCGCTCCCCTCTCTGGCCTCCGCACCCGCCTGCCT	143	2	y	1.2e-06	++ ++++++++
chr5:136083793-136084071	76	GCCGCGCCCATTCTGGGCATCCAGGACGCTGATTGGTCCTTCCATGCAGTGTCTCCCCGCCCCCGCAGGAGGGGC GGGGAGGGGTGAATGGAGTAGCGGAGATCCCTCAGCCCCAGCGCTCCCCTCTCTGGCCTCCGCACCCGCCTGCCT	215	2	n	9.5e-05	++++++ ++
chr18:12128549-12128893	151	GAACAGCCAATCAGAAGTGAGATCCTTAGTATACAGGGCGGAAAAGAAGTGGTCCAGTTCCGgccgcggccgccg	154	1	n	1e-07	++++++++++++++
chr11:76846864-76847276	151	CGGGAGGCGGCAGCCCGCCGGATCCCCTCCGCGCCTAGCAACCCCATCCCGCCTTCCAGCCTTAGCCAATCGTAG CCTTGAATGCTTGGGTGTCACTCTAGGGGGCGGGGCTTTCCTTAAAGCGGACGATTTTCCCTCTGGGCGTGTCTC	198	2	n	2.2e-05	++++++ ++
chr11:76846864-76847276	151	CGGGAGGCGGCAGCCCGCCGGATCCCCTCCGCGCCTAGCAACCCCATCCCGCCTTCCAGCCTTAGCCAATCGTAG CCTTGAATGCTTGGGTGTCACTCTAGGGGGCGGGGCTTTCCTTAAAGCGGACGATTTTCCCTCTGGGCGTGTCTC	213	1	n	2.6e-06	++++++++++ +++
chr11:76846864-76847276	151	CGGGAGGCGGCAGCCCGCCGGATCCCCTCCGCGCCTAGCAACCCCATCCCGCCTTCCAGCCTTAGCCAATCGTAG CCTTGAATGCTTGGGTGTCACTCTAGGGGGCGGGGCTTTCCTTAAAGCGGACGATTTTCCCTCTGGGCGTGTCTC	249	2	y	5.2e-07	++++++++++
chr11:76846864-76847276	301	CACTCCAGTCCTTAGGGACTTTAGTCGCTTTCCTTTCCTCCACTAAGGTTCTACCCTCTGTCTTCCCGCCTCCCT	365	2	n	6.1e-06	++++++ +++
chr1:59481981-59482296	1	CGACTTCCACCCAATCGGAACAGGTCCACAGAGAAAACAAAGCGCGCTATTGGATGTCCAGAGGGCTCGGGGCCC GCCCCCGGAGTGGTTTGTGAATGGGGGGAGGGGAGGGGGCGGGGCGGCCCGCAGCCCTGCAAGCCCGACGCTTCT	8	1	n	1e-05	++ +++++++++++
chr1:59481981-59482296	1	CGACTTCCACCCAATCGGAACAGGTCCACAGAGAAAACAAAGCGCGCTATTGGATGTCCAGAGGGCTCGGGGCCC GCCCCCGGAGTGGTTTGTGAATGGGGGGAGGGGAGGGGGCGGGGCGGCCCGCAGCCCTGCAAGCCCGACGCTTCT	73	2	n	1.5e-06	+++++++++
chr1:59481981-59482296	1	CGACTTCCACCCAATCGGAACAGGTCCACAGAGAAAACAAAGCGCGCTATTGGATGTCCAGAGGGCTCGGGGCCC GCCCCCGGAGTGGTTTGTGAATGGGGGGAGGGGAGGGGGCGGGGCGGCCCGCAGCCCTGCAAGCCCGACGCTTCT	108	2	y	9.2e-08	+++++++++++
chr18:3507705-3508110	76	GGAGCCCGGCGGCTTGTCTGCCTTAGCCCGCGTCTGGCCCCGCCCCCTGCGGCTGGGCCCTGGGGCTAGAGGCGT	114	2	n	2.6e-07	++++++++++
chr18:3507705-3508110	151	CCGCCAATCGGAGAGTGGAGGCGGGGCTTAGGGCGGGGCCGCGCTTGGCCCACTCTGGGCGCCGGGCGCTATTTA	151	1	n	1.2e-05	+ +++++++++++
chr18:3507705-3508110	151	CCGCCAATCGGAGAGTGGAGGCGGGGCTTAGGGCGGGGCCGCGCTTGGCCCACTCTGGGCGCCGGGCGCTATTTA	165	2	y	4.7e-06	+ ++ ++++++
chr18:3507705-3508110	151	CCGCCAATCGGAGAGTGGAGGCGGGGCTTAGGGCGGGGCCGCGCTTGGCCCACTCTGGGCGCCGGGCGCTATTTA	177	2	y	5.7e-05	+++++++
chr5:33820275-33821098	76	cggggccgcgcgcggcgATTGGGCGGCGGGCGTGACGTCACCGCGCCGTGGCTCGCCGTGGTTGCGGAGCTGGCC	87	1	y	7.7e-05	++ +++++++ ++
chr5:33820275-33821098	301	gcgcggATTTGAAAAGCCCGGTCCGCGGGCGACTTGAGGCGGCAGCCAATCAGCAAAGCGCACTTTTCCCGCGGC	343	1	n	1.5e-06	+++++++++++ +
chr5:33820275-33821098	376	TTCTGGGggcggcggcggccccggcggctgcggcggcggGCGGGAggcgcgggggcggggtcggcgccgcgcgcg	409	2	y	4.5e-05	++ +++++++
chr5:33820275-33821098	376	TTCTGGGggcggcggcggccccggcggctgcggcggcggGCGGGAggcgcgggggcggggtcggcgccgcgcgcg	424	2	y	4.1e-07	+ +++++++++
chr17:33810428-33810586	76	TGCGGAGCTTCGAGGGGGCGGGCTCGGGTGCGGTGCGGGCGCTGCCGGGGCTTCTCATTCAGGTAAAGTCAACCA	87	2	y	9.2e-08	+++++++++++
chr4:106650950-106651254	1	GAGGCTCTTTGGTTTGCTTTCCGGAAAACCTCTCCAGCCTCTCTCCAGAGCGTGGGACCGGAGCATCCCGCCCCC TCCCGTGAGTGCGGCTTTCCGATTGGTGAGAAACACAGGGGGCGAGGCTCCGGCCATGTCGGCGCAGGCGCACTG	67	2	n	9.2e-08	+++++++++++
chr4:106650950-106651254	1	GAGGCTCTTTGGTTTGCTTTCCGGAAAACCTCTCCAGCCTCTCTCCAGAGCGTGGGACCGGAGCATCCCGCCCCC TCCCGTGAGTGCGGCTTTCCGATTGGTGAGAAACACAGGGGGCGAGGCTCCGGCCATGTCGGCGCAGGCGCACTG	91	1	y	1.9e-05	+++++++++++ +
chr11:49712716-49713047	1	CCCTCCCACCCCAGCCAGCGAACGCCCCGCTCACCGCCGCCTCTCCAACATCCCGGCTTCTCATTGGCTGACGCT	5	2	n	3.9e-05	+++ ++++ +
chr11:49712716-49713047	1	CCCTCCCACCCCAGCCAGCGAACGCCCCGCTCACCGCCGCCTCTCCAACATCCCGGCTTCTCATTGGCTGACGCT	57	1	y	6.8e-07	+++++ ++++++++
chr11:49712716-49713047	151	CCCGGTCTCGGAGCAGTGAGCCGGCCCGGCGCGCTCCTGCCCGCCCTCCCAGCCTCTCTTCCCGCTCTCTCTGCG	190	2	n	1.9e-06	+++++++ +++
chr8:94917567-94917788	1	CGCCCACCCCACCGCTTGGTTTCCATTGGTAGCGCAACGGGTCTGGGCGTAAAGCCGTGCTCCGATTGGCCAGTG	3	2	n	2.6e-05	+++ ++++ ++
chr8:94917567-94917788	1	CGCCCACCCCACCGCTTGGTTTCCATTGGTAGCGCAACGGGTCTGGGCGTAAAGCCGTGCTCCGATTGGCCAGTG	59	1	y	1.6e-07	++++++++++++++
chr8:94917567-94917788	76	CCACCCGTCCGTCCGGCACTCGCCATGGTGACCACGTTGGGTCCCCCGGGAGAGTTCCACATTCCGCCCCCGCCT GCCATCCCCCCCCCTCCTGGCCCTGCCGGCATTCCACGGGCGCCCCCTCCCCCACTGTCCCGCCACGGGAC	144	2	n	9.1e-05	++++++ ++
chr7:35056429-35056886	76	AACCGGCAACCTCCGCCCGTTCCGCCACCGCGGCCACCGGTTTTCCCCGCCTCTTCGGGTCCGCGCGCTGCCGCC	121	2	n	5.3e-06	++++++ + ++
chr7:35056429-35056886	151	GCCGCCGTGACCAATAGAAGCGCTGCTTGGAGAACGACGCGCTCGCCTCTAGAGATGGGCAGCTCCACCAGCCAA TCACAGGCCGTGTGCCGGCGAGAGGCGGGCGCGCGGCGGAACGGGCGTGGTGGGCGTGGCAGCACCGGCGCTGGC	158	1	n	1.9e-05	++++++++ + +++
chr7:35056429-35056886	151	GCCGCCGTGACCAATAGAAGCGCTGCTTGGAGAACGACGCGCTCGCCTCTAGAGATGGGCAGCTCCACCAGCCAA TCACAGGCCGTGTGCCGGCGAGAGGCGGGCGCGCGGCGGAACGGGCGTGGTGGGCGTGGCAGCACCGGCGCTGGC	219	1	n	6.8e-07	++++++++++ +++
chr7:35056429-35056886	151	GCCGCCGTGACCAATAGAAGCGCTGCTTGGAGAACGACGCGCTCGCCTCTAGAGATGGGCAGCTCCACCAGCCAA TCACAGGCCGTGTGCCGGCGAGAGGCGGGCGCGCGGCGGAACGGGCGTGGTGGGCGTGGCAGCACCGGCGCTGGC	244	2	y	1.3e-05	+ + ++++++
chr9:124425589-124425771	1	ATAGGCGACGGGGGCGGGGCGATAGGGCAGGGCCAACGCAATAAATGGACGAGGTGACGTCACCAACACGGGCGT	8	2	y	2.5e-06	+++++++++
chr9:124425589-124425771	76	GTCCCGGCTTCCGTTTCCGGTCAATCACCCGGATTGGGGCGCCGTATAGGGGCGCGACCACATTGACATCACCGC	93	3	n	1.2e-05	+ ++++++++
chr9:124425589-124425771	151	TTTCTTCCTGCCAGGGTGGGCGTGGCCACCGT	160	2	y	8.4e-05	+ +++ +++
chr1:36709928-36710269	1	TGGACGGATGCGACTCCAGACACCGCGCCGCTCCCCTCCCCCAGTGCGCTGCCTACGCGAACGCGGCCCCGTGGC CAATCACAGATGCCAAATGACCTGATTGACGGCCGGCGCCGGGGAGGGTTGCTGGGGGAAGTGGGAGGGGCCTCT	72	1	n	1.7e-06	++++++++++ ++
[truncated: 1,476 more rows]

## Sheet: MAST_PBX1_ATAC_UniqSeq
Chromosome	Start	End	Width	Strand	Combined p-value of all motif matches within region	E-value
chr12	85824532	85825122	590	both	2.1e-08	0.00029
chr8	57511572	57512079	507	both	1.26e-07	0.0017
chr4	44704479	44704751	272	both	1.85e-07	0.0025
chr7	41632941	41633716	775	both	1.86e-07	0.0026
chr10	81648942	81649228	286	both	2.22e-07	0.003
chr8	46152489	46152615	126	both	4.12e-07	0.0057
chr8	129263541	129263762	221	both	5.85e-07	0.008
chr11	87108752	87109387	635	both	5.99e-07	0.0082
chr5	73490727	73491203	476	both	6.78e-07	0.0093
chr9	4376281	4376668	387	both	6.89e-07	0.0094
chr5	109845003	109845237	234	both	7.9e-07	0.011
chr8	76901996	76902271	275	both	8.75e-07	0.012
chr11	64978825	64979217	392	both	8.79e-07	0.012
chr5	109996408	109996660	252	both	9.75e-07	0.013
chr19	46152242	46152686	444	both	9.84e-07	0.013
chr2	150311347	150311591	244	both	1.05e-06	0.014
chr8	69749613	69750194	581	both	1.18e-06	0.016
chr9	21760276	21760721	445	both	1.33e-06	0.018
chr5	100572248	100572387	139	both	1.34e-06	0.018
chr15	99392756	99393151	395	both	1.36e-06	0.019
chr2	118901247	118901590	343	both	1.38e-06	0.019
chr2	174464035	174464369	334	both	1.47e-06	0.02
chr5	110058042	110058347	305	both	1.6e-06	0.022
chr8	69625170	69625846	676	both	1.62e-06	0.022
chr8	69395511	69395641	130	both	1.64e-06	0.022
chr6	83831655	83832150	495	both	1.72e-06	0.024
chr15	76710521	76710790	269	both	1.78e-06	0.024
chr15	78174077	78174575	498	both	1.92e-06	0.026
chr11	4186608	4187001	393	both	2.01e-06	0.028
chr13	62015848	62016037	189	both	2.18e-06	0.03
chr17	35516826	35517266	440	both	2.24e-06	0.031
chr4	133479848	133480255	407	both	2.28e-06	0.031
chr8	69716467	69717314	847	both	2.29e-06	0.031
chr4	151044649	151045119	470	both	2.37e-06	0.032
chr2	177957331	177957534	203	both	2.94e-06	0.04
chr15	99294995	99295367	372	both	3.01e-06	0.041
chr15	82354195	82354601	406	both	3.46e-06	0.047
chr2	177206481	177206682	201	both	3.63e-06	0.05
chr5	138619599	138620003	404	both	3.66e-06	0.05
chr10	81600942	81601194	252	both	3.83e-06	0.052
chr9	22307645	22307959	314	both	4.01e-06	0.055
chr10	130542015	130542479	464	both	4.24e-06	0.058
chr8	69996246	69996858	612	both	4.31e-06	0.059
chr6	146888366	146888698	332	both	4.37e-06	0.06
chr6	83867020	83867470	450	both	4.51e-06	0.062
chr4	138250192	138250440	248	both	4.6e-06	0.063
chr8	69208957	69209219	262	both	4.66e-06	0.064
chr1	131827654	131828172	518	both	5.21e-06	0.071
chr5	109923335	109923806	471	both	5.28e-06	0.072
chr2	167661633	167661936	303	both	5.33e-06	0.073
chr5	109866413	109866886	473	both	5.34e-06	0.073
chr17	17004691	17005201	510	both	5.34e-06	0.073
chr4	137862126	137862358	232	both	5.86e-06	0.08
chr5	110135627	110136033	406	both	6e-06	0.082
chr7	18910358	18910752	394	both	6.06e-06	0.083
chr16	14163135	14163383	248	both	6.12e-06	0.084
chr6	113237613	113238002	389	both	6.12e-06	0.084
chr2	177840374	177840564	190	both	6.19e-06	0.085
chr11	78328299	78328592	293	both	6.29e-06	0.086
chr2	160731172	160731399	227	both	6.29e-06	0.086
chr5	135744159	135744499	340	both	6.4e-06	0.088
chr19	14598087	14598659	572	both	6.48e-06	0.089
chr9	121710183	121710545	362	both	6.51e-06	0.089
chr17	46751758	46752512	754	both	6.68e-06	0.092
chr2	60383282	60383603	321	both	6.74e-06	0.092
chr9	66834666	66835134	468	both	6.79e-06	0.093
chr4	28812950	28813215	265	both	6.91e-06	0.095
chr10	52417343	52417757	414	both	7.18e-06	0.098
chr7	127208605	127209424	819	both	8.2e-06	0.11
chr18	77047273	77047481	208	both	8.63e-06	0.12
chr5	110094398	110094843	445	both	8.68e-06	0.12
chr11	32454963	32455517	554	both	8.79e-06	0.12
chr1	82283311	82283511	200	both	9.18e-06	0.13
chr13	37857749	37858075	326	both	9.78e-06	0.13
chr11	95858699	95859415	716	both	9.79e-06	0.13
chr19	24280206	24281243	1037	both	1.01e-05	0.14
chr17	55959012	55959605	593	both	1.07e-05	0.15
chr2	150136615	150136920	305	both	1.08e-05	0.15
chr10	128270362	128270700	338	both	1.08e-05	0.15
chr18	73572100	73572848	748	both	1.09e-05	0.15
chr7	25221288	25221564	276	both	1.09e-05	0.15
chr15	100761682	100762065	383	both	1.19e-05	0.16
chr12	24831331	24831754	423	both	1.2e-05	0.16
chr7	44929483	44930105	622	both	1.22e-05	0.17
chr11	106084136	106084695	559	both	1.24e-05	0.17
chr1	168432356	168432673	317	both	1.29e-05	0.18
chr17	24886316	24886852	536	both	1.29e-05	0.18
chr4	11966319	11966840	521	both	1.3e-05	0.18
chr6	88084367	88084673	306	both	1.31e-05	0.18
chr15	99651577	99651897	320	both	1.35e-05	0.19
chr3	96905099	96905497	398	both	1.38e-05	0.19
chr8	47533403	47533833	430	both	1.39e-05	0.19
chr13	44730510	44731419	909	both	1.43e-05	0.2
chr7	4739696	4740267	571	both	1.43e-05	0.2
chr3	108653795	108654069	274	both	1.47e-05	0.2
chr10	85102335	85102905	570	both	1.5e-05	0.21
chr8	46551784	46552176	392	both	1.52e-05	0.21
chr10	7667478	7667646	168	both	1.52e-05	0.21
chrX	152001771	152002047	276	both	1.56e-05	0.21
chr7	27486772	27487196	424	both	1.64e-05	0.22
chr7	24399509	24400108	599	both	1.7e-05	0.23
chr1	153899791	153900085	294	both	1.71e-05	0.23
chr5	120588549	120589124	575	both	1.81e-05	0.25
chr13	13590180	13590543	363	both	1.85e-05	0.25
chr15	100422941	100423358	417	both	1.86e-05	0.26
chrX	140456494	140456789	295	both	1.9e-05	0.26
chr8	18846133	18846710	577	both	1.9e-05	0.26
chr11	69059498	69059883	385	both	1.91e-05	0.26
chr2	27539930	27540569	639	both	1.99e-05	0.27
chr5	137684620	137685102	482	both	2e-05	0.27
chr7	81571165	81571927	762	both	2.07e-05	0.28
chr19	44266963	44267312	349	both	2.15e-05	0.3
chr5	145204052	145204678	626	both	2.16e-05	0.3
chr1	52233124	52233611	487	both	2.22e-05	0.3
chr14	55015115	55015604	489	both	2.25e-05	0.31
chr6	29916925	29917196	271	both	2.29e-05	0.31
chr4	42949704	42950052	348	both	2.3e-05	0.31
chr17	84957152	84958126	974	both	2.3e-05	0.32
chr10	80329784	80330223	439	both	2.35e-05	0.32
chr19	61140776	61141069	293	both	2.35e-05	0.32
chr17	87446721	87447397	676	both	2.38e-05	0.33
chr11	73176962	73177345	383	both	2.45e-05	0.34
chr6	100287410	100287708	298	both	2.45e-05	0.34
chr7	41393137	41393639	502	both	2.49e-05	0.34
chr13	119690058	119690549	491	both	2.49e-05	0.34
chr11	103966375	103966872	497	both	2.49e-05	0.34
chr4	46489152	46489491	339	both	2.5e-05	0.34
chr4	155812316	155812664	348	both	2.55e-05	0.35
chr15	75748311	75748691	380	both	2.55e-05	0.35
chr18	82855760	82855933	173	both	2.56e-05	0.35
chr10	79097573	79097843	270	both	2.6e-05	0.36
chr12	100724807	100725585	778	both	2.63e-05	0.36
chr9	103365691	103366196	505	both	2.63e-05	0.36
chr17	6827826	6828276	450	both	2.66e-05	0.36
chr12	73907712	73908174	462	both	2.67e-05	0.37
chr7	67222418	67222724	306	both	2.69e-05	0.37
chr19	56822135	56822509	374	both	2.73e-05	0.37
chr3	131303147	131303400	253	both	2.75e-05	0.38
chr7	19421383	19421619	236	both	2.79e-05	0.38
chr9	118925433	118925645	212	both	2.79e-05	0.38
chr8	70212259	70212973	714	both	2.81e-05	0.38
chr5	115845057	115845370	313	both	2.81e-05	0.39
chr11	96829506	96830365	859	both	2.86e-05	0.39
chr13	62760675	62760924	249	both	2.87e-05	0.39
chr9	124282199	124282458	259	both	2.9e-05	0.4
chr11	84869861	84871049	1188	both	2.91e-05	0.4
chr7	113207190	113207597	407	both	2.95e-05	0.4
chr6	83121388	83121807	419	both	2.95e-05	0.4
chr11	49846509	49846998	489	both	2.97e-05	0.41
chr2	161109059	161109434	375	both	3.03e-05	0.42
chr11	50292155	50292717	562	both	3.11e-05	0.43
chr12	84772930	84773450	520	both	3.19e-05	0.44
chr5	138441372	138441642	270	both	3.2e-05	0.44
chr12	118301198	118302478	1280	both	3.23e-05	0.44
chr8	4613054	4613364	310	both	3.28e-05	0.45
chr2	84715097	84715872	775	both	3.3e-05	0.45
chr11	96916459	96916886	427	both	3.34e-05	0.46
chr12	111442385	111442757	372	both	3.34e-05	0.46
chr3	104511650	104512228	578	both	3.4e-05	0.47
chr7	44986452	44986988	536	both	3.42e-05	0.47
chr9	109082358	109082693	335	both	3.44e-05	0.47
chr11	96977401	96978188	787	both	3.5e-05	0.48
chr7	45916638	45916994	356	both	3.55e-05	0.49
chr14	14702779	14703249	470	both	3.6e-05	0.49
chr5	138622755	138623017	262	both	3.64e-05	0.5
chr8	26158018	26158919	901	both	3.68e-05	0.5
chr11	101171374	101171629	255	both	3.71e-05	0.51
chr19	41981092	41981759	667	both	3.71e-05	0.51
chr11	101095367	101095720	353	both	3.77e-05	0.52
chr19	55741634	55741874	240	both	3.87e-05	0.53
chr17	17294182	17294519	337	both	3.9e-05	0.53
chr11	43681706	43682161	455	both	3.95e-05	0.54
chr1	184034187	184034566	379	both	3.98e-05	0.55
chr8	94214370	94214766	396	both	4e-05	0.55
chr18	67449143	67449603	460	both	4.03e-05	0.55
chr14	31128892	31129249	357	both	4.04e-05	0.55
chr11	115276860	115277460	600	both	4.06e-05	0.56
chr14	52244469	52244800	331	both	4.07e-05	0.56
chr5	73256583	73257019	436	both	4.07e-05	0.56
chr8	72492630	72493092	462	both	4.09e-05	0.56
chr5	124327529	124328280	751	both	4.12e-05	0.56
chr10	76531369	76531772	403	both	4.12e-05	0.57
chr19	21652824	21653333	509	both	4.14e-05	0.57
chr5	105876408	105876724	316	both	4.15e-05	0.57
chr11	69098719	69099018	299	both	4.17e-05	0.57
chr7	42692779	42693010	231	both	4.19e-05	0.57
chr7	73537730	73538201	471	both	4.29e-05	0.59
chr6	127330346	127330521	175	both	4.3e-05	0.59
chr5	136908082	136908274	192	both	4.33e-05	0.59
chr17	71551881	71552261	380	both	4.34e-05	0.59
chr11	55469192	55469821	629	both	4.35e-05	0.6
chr8	84237038	84237485	447	both	4.39e-05	0.6
chr1	191396979	191397845	866	both	4.39e-05	0.6
chr17	30612458	30612874	416	both	4.42e-05	0.61
chr9	22156665	22157080	415	both	4.45e-05	0.61
chr13	62466634	62467068	434	both	4.47e-05	0.61
chr10	80167594	80168051	457	both	4.48e-05	0.61
chr5	123141127	123141433	306	both	4.54e-05	0.62
chr15	100551801	100552298	497	both	4.61e-05	0.63
chr6	87850993	87851361	368	both	4.64e-05	0.64
chr6	85451263	85452160	897	both	4.77e-05	0.65
chr7	90475938	90476392	454	both	4.79e-05	0.66
chr4	134714097	134714307	210	both	4.85e-05	0.66
chr15	102296116	102296428	312	both	4.91e-05	0.67
chr4	8647137	8647782	645	both	4.91e-05	0.67
chrX	8074565	8074940	375	both	4.93e-05	0.68
chr4	132510420	132510775	355	both	4.94e-05	0.68
chr8	75033549	75034293	744	both	5.07e-05	0.69
chr17	28232526	28232883	357	both	5.13e-05	0.7
chr11	3648983	3649423	440	both	5.16e-05	0.71
chr8	69270969	69271200	231	both	5.36e-05	0.73
chr11	23255475	23256103	628	both	5.44e-05	0.75
chrX	38456446	38456690	244	both	5.52e-05	0.76
chr1	57995873	57996141	268	both	5.56e-05	0.76
chr1	36511699	36512038	339	both	5.62e-05	0.77
chr6	30693546	30693996	450	both	5.94e-05	0.81
chr3	36150929	36151254	325	both	5.97e-05	0.82
chr14	67715682	67716296	614	both	5.98e-05	0.82
chr2	122467725	122468083	358	both	5.99e-05	0.82
chr7	102209890	102210677	787	both	6.07e-05	0.83
chr3	89101932	89102300	368	both	6.09e-05	0.83
chr9	61370516	61370854	338	both	6.13e-05	0.84
chr9	21291148	21291667	519	both	6.32e-05	0.87
chr8	117157798	117158112	314	both	6.32e-05	0.87
chr8	83972634	83973077	443	both	6.56e-05	0.9
chr16	97996997	97997463	466	both	6.56e-05	0.9
chr11	119053414	119053605	191	both	6.63e-05	0.91
chr3	54692588	54692998	410	both	6.64e-05	0.91
chr5	92042635	92042977	342	both	6.65e-05	0.91
chr17	74489402	74489926	524	both	6.71e-05	0.92
chr12	85280365	85280656	291	both	6.71e-05	0.92
chr17	83350755	83351068	313	both	6.8e-05	0.93
chr5	109556858	109559133	2275	both	6.81e-05	0.93
chr12	36042451	36042770	319	both	6.82e-05	0.93
chr2	30474246	30474414	168	both	6.87e-05	0.94
chr7	143460977	143461296	319	both	6.91e-05	0.95
chr17	24141515	24141909	394	both	6.94e-05	0.95
chr2	132815995	132816362	367	both	7.06e-05	0.97
chr1	136624659	136625112	453	both	7.07e-05	0.97
chr19	3575687	3576352	665	both	7.09e-05	0.97
chr13	112800689	112801102	413	both	7.14e-05	0.98
chr9	101034527	101035091	564	both	7.15e-05	0.98
chr5	122820869	122821602	733	both	7.17e-05	0.98
chr18	90579552	90579985	433	both	7.22e-05	0.99
chr17	46890474	46890834	360	both	7.3e-05	1
chr17	24414384	24414810	426	both	7.4e-05	1
chr7	25267463	25268509	1046	both	7.44e-05	1
chr9	108002395	108002790	395	both	7.52e-05	1
chr9	21955635	21956245	610	both	7.53e-05	1
chr1	52119298	52119635	337	both	7.6e-05	1
chr10	69352878	69353198	320	both	7.87e-05	1.1
chr11	23007619	23008564	945	both	8.01e-05	1.1
chr14	21075834	21076341	507	both	8.14e-05	1.1
chr7	142095320	142095565	245	both	8.2e-05	1.1
chr5	123132410	123132857	447	both	8.29e-05	1.1
chr2	62664155	62664562	407	both	8.3e-05	1.1
chr4	139192504	139192999	495	both	8.52e-05	1.2
chr18	80151027	80152060	1033	both	8.55e-05	1.2
chr11	84179412	84179881	469	both	8.75e-05	1.2
chr12	76710013	76710399	386	both	8.89e-05	1.2
chr1	131910269	131910640	371	both	8.9e-05	1.2
chr15	82146919	82147425	506	both	8.94e-05	1.2
chr19	4755721	4756756	1035	both	9e-05	1.2
chr15	81190739	81191143	404	both	9.02e-05	1.2
chr7	16842848	16843066	218	both	9.02e-05	1.2
chr4	41464820	41465301	481	both	9.04e-05	1.2
chr16	42875126	42876005	879	both	9.37e-05	1.3
chr4	149166579	149166974	395	both	9.67e-05	1.3
chr19	6067196	6068103	907	both	9.82e-05	1.3
chr5	136116532	136116880	348	both	9.83e-05	1.3
chr1	53785012	53785518	506	both	9.93e-05	1.4
chr19	4231700	4232104	404	both	9.95e-05	1.4
chr17	34603679	34604466	787	both	0.000101	1.4
chr5	109690786	109691151	365	both	0.000101	1.4
chr10	81432982	81433302	320	both	0.000102	1.4
chr19	42090187	42090583	396	both	0.000104	1.4
chr10	95940485	95940897	412	both	0.000106	1.4
chr7	19345015	19345574	559	both	0.000106	1.5
chrX	73082497	73082675	178	both	0.000106	1.5
chr7	12977782	12978431	649	both	0.000107	1.5
chr7	127273971	127274279	308	both	0.000108	1.5
chr16	3847068	3847412	344	both	0.000109	1.5
chr17	63863769	63864083	314	both	0.000111	1.5
chr14	63177863	63178299	436	both	0.000112	1.5
chr6	47813278	47813886	608	both	0.000112	1.5
chr9	113930699	113931260	561	both	0.000113	1.5
chr19	44284164	44284496	332	both	0.000114	1.6
chr4	151861761	151862673	912	both	0.000114	1.6
chr11	73018850	73019161	311	both	0.000115	1.6
chr18	33213824	33214211	387	both	0.000115	1.6
chr12	108275443	108275781	338	both	0.000115	1.6
chr18	34751540	34751888	348	both	0.000116	1.6
chr17	35046655	35047074	419	both	0.000117	1.6
chr5	117287398	117287873	475	both	0.000118	1.6
chr7	118705477	118705964	487	both	0.000118	1.6
chr7	16781185	16781501	316	both	0.000119	1.6
chr14	122534149	122534508	359	both	0.00012	1.6
chr15	79328142	79328561	419	both	0.000121	1.7
chr6	83317158	83317811	653	both	0.000122	1.7
chr2	30981899	30982470	571	both	0.000124	1.7
chr6	47594986	47595381	395	both	0.000124	1.7
chr10	127121117	127121413	296	both	0.000125	1.7
chr19	60755841	60756210	369	both	0.000125	1.7
chr10	85128010	85128297	287	both	0.000126	1.7
chrX	52912104	52912466	362	both	0.000126	1.7
chr5	130144450	130145117	667	both	0.000127	1.7
chr7	92669862	92670398	536	both	0.000127	1.7
chr10	127676822	127677201	379	both	0.000127	1.7
chr18	7626772	7627247	475	both	0.000128	1.8
chr11	54437960	54438343	383	both	0.000129	1.8
chr3	96414841	96415007	166	both	0.000129	1.8
chr17	33909171	33909595	424	both	0.00013	1.8
chr11	78550705	78551051	346	both	0.000132	1.8
chr5	122502181	122502590	409	both	0.000132	1.8
chr1	93511869	93512296	427	both	0.000136	1.9
chr6	72097353	72097711	358	both	0.000136	1.9
chr6	134640871	134641244	373	both	0.000136	1.9
chr14	67008448	67009184	736	both	0.000137	1.9
chr7	30600051	30600335	284	both	0.000137	1.9
chr18	54902422	54902703	281	both	0.000137	1.9
chr2	155381709	155382362	653	both	0.000138	1.9
chrX	152342414	152342771	357	both	0.000138	1.9
chr11	60417001	60417432	431	both	0.000138	1.9
chr12	76255089	76255511	422	both	0.000139	1.9
chr19	44248166	44248549	383	both	0.000139	1.9
chr11	22287024	22287281	257	both	0.000139	1.9
chr7	19003006	19004179	1173	both	0.000139	1.9
chr11	79992765	79993317	552	both	0.00014	1.9
chr18	12121310	12121722	412	both	0.000141	1.9
chr17	31564324	31564984	660	both	0.000141	1.9
chr4	119733600	119733950	350	both	0.000144	2
chr14	16364970	16365879	909	both	0.000145	2
chr13	3917924	3918373	449	both	0.000146	2
chr1	43098481	43098926	445	both	0.000146	2
chr2	69205947	69206471	524	both	0.000146	2
chr3	108256828	108257329	501	both	0.000147	2
chr2	144011191	144011688	497	both	0.000147	2
chr7	101933811	101934219	408	both	0.000148	2
chr8	31111634	31111893	259	both	0.00015	2.1
chr17	28486116	28486458	342	both	0.00015	2.1
chr5	146220963	146221514	551	both	0.00015	2.1
chr11	120232743	120233043	300	both	0.00015	2.1
chr13	45389508	45389944	436	both	0.000152	2.1
chr13	80885501	80886394	893	both	0.000156	2.1
chr5	105495288	105495484	196	both	0.000156	2.1
chr6	37870545	37870964	419	both	0.000157	2.1
chr6	29694065	29694331	266	both	0.000157	2.2
chr15	82345850	82346499	649	both	0.000157	2.2
chr17	17234664	17235008	344	both	0.000159	2.2
chr10	98914109	98915215	1106	both	0.00016	2.2
chr17	55891918	55892226	308	both	0.000161	2.2
chr13	47105954	47106610	656	both	0.000161	2.2
chr10	41809636	41810641	1005	both	0.000162	2.2
chr4	133130411	133130735	324	both	0.000162	2.2
chr4	131910783	131910991	208	both	0.000163	2.2
chr19	61265424	61266853	1429	both	0.000164	2.2
chr9	40800767	40801538	771	both	0.000167	2.3
chr1	23256063	23256367	304	both	0.000167	2.3
chr9	64253531	64253976	445	both	0.000168	2.3
chr3	130709369	130709891	522	both	0.000168	2.3
chr16	31081306	31081631	325	both	0.00017	2.3
chrX	7648736	7649258	522	both	0.000172	2.4
chr14	55559912	55561022	1110	both	0.000174	2.4
chr8	126422300	126422657	357	both	0.000175	2.4
chr1	59912833	59913831	998	both	0.000176	2.4
chr10	128303178	128303780	602	both	0.000177	2.4
chr1	80340597	80341227	630	both	0.000179	2.4
chr17	16951366	16951703	337	both	0.000179	2.5
chr19	44388527	44388844	317	both	0.00018	2.5
chr16	62846978	62847289	311	both	0.000181	2.5
chr9	62122575	62123029	454	both	0.000181	2.5
chrX	7574302	7574887	585	both	0.000183	2.5
chr18	61626549	61626850	301	both	0.000184	2.5
chr17	33759861	33760812	951	both	0.000185	2.5
chr4	148591301	148591624	323	both	0.000187	2.6
chr4	128806987	128807088	101	both	0.000187	2.6
chr11	120572817	120573543	726	both	0.000187	2.6
chr15	76671476	76671809	333	both	0.000188	2.6
chr18	76241172	76242049	877	both	0.000188	2.6
chr10	75773378	75773702	324	both	0.00019	2.6
chr19	11965276	11965907	631	both	0.00019	2.6
chr4	44012497	44012871	374	both	0.00019	2.6
chr10	61695350	61695733	383	both	0.000195	2.7
chr3	96576838	96577055	217	both	0.000197	2.7
chr14	118136971	118137260	289	both	0.000197	2.7
chr19	46573087	46573581	494	both	0.000197	2.7
chr10	53596622	53597040	418	both	0.000198	2.7
chr13	34874309	34875980	1671	both	0.0002	2.7
chr3	95882042	95882611	569	both	0.000205	2.8
chr19	8897929	8898274	345	both	0.000205	2.8
chr16	36828201	36828662	461	both	0.000206	2.8
chr7	48788853	48789185	332	both	0.000207	2.8
chr1	120121016	120121345	329	both	0.000208	2.9
chr12	83487729	83488035	306	both	0.000209	2.9
chr6	142386964	142387380	416	both	0.00021	2.9
chr7	89404215	89404491	276	both	0.000211	2.9
chr16	94569333	94569803	470	both	0.000212	2.9
chr2	148672448	148672785	337	both	0.000213	2.9
chrX	93632116	93632403	287	both	0.000213	2.9
chr16	96127792	96128298	506	both	0.000214	2.9
chr11	106036654	106037044	390	both	0.000215	2.9
chr3	108911172	108911988	816	both	0.000215	2.9
chr11	43426174	43426456	282	both	0.000215	3
chr2	132578076	132578482	406	both	0.000216	3
chr10	72654689	72655060	371	both	0.000217	3
chr7	75782060	75782383	323	both	0.000217	3
chr8	83332405	83332749	344	both	0.000218	3
chr7	28766397	28766914	517	both	0.000218	3
chr2	127831860	127832121	261	both	0.00022	3
chr12	8640766	8641286	520	both	0.000223	3.1
chr16	98081966	98082656	690	both	0.000225	3.1
chr5	136083793	136084071	278	both	0.000226	3.1
chr18	12128549	12128893	344	both	0.000227	3.1
chr11	76846864	76847276	412	both	0.000227	3.1
chr1	59481981	59482296	315	both	0.000229	3.1
chr18	3507705	3508110	405	both	0.000229	3.1
chr5	33820275	33821098	823	both	0.00023	3.1
chr17	33810428	33810586	158	both	0.00023	3.1
chr4	106650950	106651254	304	both	0.000234	3.2
chr11	49712716	49713047	331	both	0.000234	3.2
chr8	94917567	94917788	221	both	0.000234	3.2
chr7	35056429	35056886	457	both	0.000235	3.2
chr9	124425589	124425771	182	both	0.000235	3.2
chr1	36709928	36710269	341	both	0.000236	3.2
chr3	144570183	144570593	410	both	0.000238	3.3
chr15	82338837	82339135	298	both	0.000239	3.3
chr7	45568197	45568528	331	both	0.000239	3.3
chr5	110839708	110840147	439	both	0.000241	3.3
chr10	128704966	128705298	332	both	0.000242	3.3
chr18	31634196	31635257	1061	both	0.000243	3.3
chr4	136309932	136311146	1214	both	0.000243	3.3
chr11	98192968	98193558	590	both	0.000243	3.3
chr3	90292858	90293318	460	both	0.000246	3.4
chr5	31202000	31202611	611	both	0.000247	3.4
chr1	91413141	91413581	440	both	0.000248	3.4
chr4	132533590	132533841	251	both	0.000248	3.4
chr11	60210379	60210697	318	both	0.000248	3.4
chr17	83666712	83666912	200	both	0.00025	3.4
chr1	133131032	133131498	466	both	0.00025	3.4
chr15	79741391	79742732	1341	both	0.00025	3.4
chr1	20820311	20820621	310	both	0.000251	3.4
chr10	89443695	89444122	427	both	0.000253	3.5
chr6	125572649	125573609	960	both	0.000254	3.5
chr17	74395460	74395759	299	both	0.000258	3.5
chr3	32708351	32708854	503	both	0.000259	3.6
chr17	34644726	34644926	200	both	0.000259	3.6
chr2	157278926	157279435	509	both	0.00026	3.6
chr11	70237643	70238160	517	both	0.00026	3.6
chr9	44113475	44113866	391	both	0.000264	3.6
chr1	58586254	58586509	255	both	0.000265	3.6
chr8	119840399	119840813	414	both	0.000265	3.6
chr2	168080599	168081010	411	both	0.000272	3.7
chr1	93803752	93804482	730	both	0.000272	3.7
chr5	104571556	104571823	267	both	0.000272	3.7
chr10	24149186	24149555	369	both	0.000273	3.7
chr6	71632798	71633689	891	both	0.000273	3.7
chr7	28372651	28373069	418	both	0.000275	3.8
chr7	41499436	41499710	274	both	0.000275	3.8
chr12	85219286	85219631	345	both	0.000275	3.8
chr9	121277538	121277943	405	both	0.000277	3.8
chr5	33629554	33630017	463	both	0.000278	3.8
chr5	113164900	113165358	458	both	0.000281	3.8
chr11	80080897	80081420	523	both	0.000281	3.9
chr11	71019240	71019809	569	both	0.000282	3.9
chr15	90224130	90224472	342	both	0.000284	3.9
chr5	135168386	135169053	667	both	0.000285	3.9
chr10	127324642	127324870	228	both	0.000286	3.9
chr4	156109729	156110191	462	both	0.000288	4
chr7	127260672	127261095	423	both	0.000289	4
chr1	191906531	191906911	380	both	0.000292	4
chr2	154603595	154604097	502	both	0.000292	4
chr7	78895768	78896100	332	both	0.000293	4
chr5	137628685	137629297	612	both	0.000295	4
chr14	121797738	121798733	995	both	0.000295	4
chr3	95588697	95589056	359	both	0.000295	4
chrX	9332661	9332889	228	both	0.000296	4.1
chr2	180119025	180119502	477	both	0.000297	4.1
chr17	23771571	23771908	337	both	0.000297	4.1
chr9	32695848	32696231	383	both	0.000298	4.1
chr8	25016791	25017417	626	both	0.000299	4.1
chr7	48880995	48881796	801	both	0.0003	4.1
chr9	14784517	14784975	458	both	0.0003	4.1
chr12	24651081	24652377	1296	both	0.000301	4.1
chr13	41016168	41016473	305	both	0.000301	4.1
chr17	87107234	87107615	381	both	0.000301	4.1
chr17	55944967	55945545	578	both	0.000301	4.1
chr8	90908166	90908697	531	both	0.000301	4.1
chr13	51644921	51645502	581	both	0.000304	4.2
chr12	8499757	8500374	617	both	0.000305	4.2
chr6	86669177	86669735	558	both	0.000305	4.2
chr1	136346002	136346341	339	both	0.000306	4.2
chr19	5875192	5875510	318	both	0.000306	4.2
chr9	100545801	100546437	636	both	0.000307	4.2
chr11	68967808	68968258	450	both	0.000307	4.2
chr4	116123678	116123989	311	both	0.000308	4.2
chr19	45058354	45058781	427	both	0.000308	4.2
chr4	108833568	108833913	345	both	0.00031	4.3
chr7	27553028	27553415	387	both	0.00031	4.3
chr11	79962320	79962672	352	both	0.000311	4.3
chr17	3557467	3558117	650	both	0.000312	4.3
chr9	56418062	56418481	419	both	0.000313	4.3
chr3	41082956	41083588	632	both	0.000314	4.3
chr15	81871932	81872629	697	both	0.000316	4.3
chr7	3644699	3645418	719	both	0.000318	4.4
chr5	34573355	34573921	566	both	0.00032	4.4
chr11	90249161	90249576	415	both	0.000321	4.4
chr4	132768090	132768431	341	both	0.000323	4.4
chr5	93267054	93268314	1260	both	0.000326	4.5
chr17	55878738	55879238	500	both	0.000327	4.5
chr10	52382010	52382424	414	both	0.000327	4.5
chr14	79587246	79587889	643	both	0.000328	4.5
chr10	63023673	63024282	609	both	0.00033	4.5
chr15	103305343	103305567	224	both	0.00033	4.5
chr7	19508343	19508890	547	both	0.00033	4.5
chr5	113841994	113842233	239	both	0.000331	4.5
chr12	84450952	84451580	628	both	0.000332	4.6
chr2	18392542	18393012	470	both	0.000333	4.6
chr4	120666385	120666672	287	both	0.000334	4.6
chr8	4677389	4678816	1427	both	0.000336	4.6
chr1	15805498	15805789	291	both	0.000337	4.6
chr13	3537695	3538254	559	both	0.000338	4.6
chr14	52103972	52104608	636	both	0.000341	4.7
chr15	82244374	82244747	373	both	0.000341	4.7
chr10	118141582	118142012	430	both	0.000345	4.7
chrX	71214797	71215169	372	both	0.000345	4.7
chr12	113222187	113222637	450	both	0.000346	4.7
chr1	37541045	37541333	288	both	0.000355	4.9
chr8	113634949	113635777	828	both	0.000357	4.9
chr3	97767744	97768471	727	both	0.000359	4.9
chr9	108578612	108578985	373	both	0.000359	4.9
chr2	30364031	30364378	347	both	0.000361	4.9
chr14	31830651	31831064	413	both	0.000361	4.9
chr12	78748665	78749103	438	both	0.000361	5
chr4	116720724	116721123	399	both	0.000364	5
chr4	149426602	149426976	374	both	0.000364	5
chr6	34476099	34476447	348	both	0.000365	5
chr9	110732668	110732994	326	both	0.000367	5
chr19	12794799	12796369	1570	both	0.000368	5
chr13	81783103	81783985	882	both	0.000368	5
chr6	70844143	70844682	539	both	0.000372	5.1
chr9	121857577	121858189	612	both	0.000373	5.1
chr7	27232897	27233195	298	both	0.000374	5.1
chr17	94864769	94865068	299	both	0.000379	5.2
chr10	81167697	81168114	417	both	0.000379	5.2
chr7	97579455	97579975	520	both	0.00038	5.2
chr1	67038863	67039063	200	both	0.000381	5.2
chr3	88296759	88297302	543	both	0.000384	5.3
chr3	100489118	100489622	504	both	0.000387	5.3
chr17	87025347	87025729	382	both	0.000391	5.4
chr13	64370153	64370598	445	both	0.000393	5.4
chr8	72160839	72161464	625	both	0.000394	5.4
chr18	36744463	36744859	396	both	0.000396	5.4
chr12	85455172	85455659	487	both	0.000396	5.4
chr3	88141979	88142536	557	both	0.000397	5.4
chr11	97744755	97745382	627	both	0.000397	5.4
chr3	104220296	104220762	466	both	0.000397	5.4
chr4	116221116	116221729	613	both	0.000398	5.4
chr16	55895173	55895688	515	both	0.000399	5.5
chr9	21030840	21031086	246	both	0.000399	5.5
chr15	102136108	102136560	452	both	0.000405	5.5
chr11	98358266	98358569	303	both	0.000409	5.6
chr2	53191192	53192224	1032	both	0.000413	5.7
chr9	50739418	50739667	249	both	0.000414	5.7
chr19	9982471	9983175	704	both	0.000414	5.7
chr4	148448309	148448731	422	both	0.000417	5.7
chr14	122983167	122983584	417	both	0.000418	5.7
chr11	63922319	63922565	246	both	0.000418	5.7
chr17	56831080	56831517	437	both	0.00042	5.8
chr7	19308259	19308841	582	both	0.000421	5.8
chr2	136890951	136892294	1343	both	0.000423	5.8
chr2	168590298	168590564	266	both	0.000424	5.8
chr14	76504308	76504715	407	both	0.000425	5.8
chr7	66689599	66690102	503	both	0.000425	5.8
chr19	4510141	4510664	523	both	0.000426	5.8
chr10	81014912	81015241	329	both	0.000428	5.9
chr7	30322307	30322641	334	both	0.000428	5.9
chr6	113419305	113419577	272	both	0.000428	5.9
chr10	80226362	80226796	434	both	0.000429	5.9
chr5	74092858	74093294	436	both	0.000433	5.9
chr14	115040812	115041068	256	both	0.000434	6
chr17	15826616	15826785	169	both	0.000436	6
chr7	30698854	30698910	56	both	0.000437	6
chr2	32137913	32138345	432	both	0.000438	6
chr5	33652031	33652879	848	both	0.000441	6
chr4	119108630	119109364	734	both	0.000441	6
chr2	150904582	150905008	426	both	0.000445	6.1
chr3	89411878	89412229	351	both	0.000447	6.1
chr18	82475065	82475337	272	both	0.000448	6.1
chr11	116433832	116434269	437	both	0.00045	6.2
chr4	154160653	154160991	338	both	0.000451	6.2
chr6	42264695	42265196	501	both	0.000453	6.2
chr12	20921141	20921411	270	both	0.000454	6.2
chr17	72836222	72836855	633	both	0.000454	6.2
chr11	116335420	116335634	214	both	0.000456	6.2
chr1	75191951	75192307	356	both	0.000456	6.3
chr14	54893791	54894270	479	both	0.000458	6.3
chr11	106999308	106999864	556	both	0.00046	6.3
chr5	34187686	34188259	573	both	0.000464	6.4
chr18	38992895	38993322	427	both	0.000466	6.4
chr11	118476773	118477150	377	both	0.000466	6.4
chr8	70527652	70527882	230	both	0.000468	6.4
chr17	64600605	64600947	342	both	0.000468	6.4
chr19	4169408	4169846	438	both	0.000468	6.4
chr1	7397708	7398347	639	both	0.000469	6.4
chrX	7898925	7899553	628	both	0.00047	6.4
chrX	12005677	12005981	304	both	0.000475	6.5
chr11	90002807	90003122	315	both	0.000475	6.5
chr2	33371232	33371697	465	both	0.000477	6.5
chr7	126396717	126397161	444	both	0.000478	6.5
chr17	25727409	25727876	467	both	0.000478	6.6
chr10	76032441	76032764	323	both	0.000478	6.6
chr7	44815700	44816435	735	both	0.00048	6.6
chr9	65586975	65587267	292	both	0.00048	6.6
chr10	80053363	80053808	445	both	0.00048	6.6
chr4	109201938	109202485	547	both	0.000481	6.6
chr10	19044029	19044222	193	both	0.000486	6.7
chr7	118532979	118533597	618	both	0.00049	6.7
chr1	131527242	131528037	795	both	0.00049	6.7
chr17	88065884	88066623	739	both	0.000492	6.7
chr19	41597282	41597532	250	both	0.000492	6.7
chr1	91398573	91399041	468	both	0.000492	6.7
chr3	108591169	108591558	389	both	0.000493	6.8
chrX	93832053	93832341	288	both	0.000493	6.8
chr13	112463962	112464289	327	both	0.000494	6.8
chr16	8470667	8471000	333	both	0.000496	6.8
chr11	100738141	100738581	440	both	0.000497	6.8
chr1	135313647	135314018	371	both	0.000499	6.8
chr18	42275129	42275523	394	both	0.0005	6.8
chr4	41760394	41760645	251	both	0.000502	6.9
chr11	58847042	58847327	285	both	0.000502	6.9
chr17	35916351	35917099	748	both	0.000511	7
chr14	103099040	103099943	903	both	0.000512	7
chr11	101278899	101279181	282	both	0.000515	7.1
chr18	34651424	34651989	565	both	0.000516	7.1
chrX	73914913	73915331	418	both	0.000517	7.1
chr14	70549426	70549613	187	both	0.00052	7.1
chr13	58128538	58129143	605	both	0.000521	7.1
chr9	57505922	57506149	227	both	0.000521	7.1
chr9	61946639	61947058	419	both	0.000521	7.1
chr17	34959226	34959472	246	both	0.000522	7.2
chr15	57912013	57912379	366	both	0.000523	7.2
chr16	18836530	18836791	261	both	0.000524	7.2
chr5	96162530	96162771	241	both	0.000524	7.2
chr3	108283877	108284221	344	both	0.000525	7.2
chr11	60352840	60353353	513	both	0.000525	7.2
chr11	116389390	116389590	200	both	0.000525	7.2
chr2	73892562	73893132	570	both	0.000525	7.2
chr1	166002607	166003580	973	both	0.000529	7.3
chr5	139200405	139200845	440	both	0.000534	7.3
chrX	7841146	7841984	838	both	0.000537	7.4
chr5	140830423	140830894	471	both	0.000541	7.4
chr15	102517893	102518861	968	both	0.000541	7.4
chr17	33718634	33719002	368	both	0.000542	7.4
chr15	3995568	3996191	623	both	0.000542	7.4
chr2	32727463	32727740	277	both	0.000543	7.4
chr18	62189255	62189514	259	both	0.000543	7.4
chr4	148140128	148140685	557	both	0.000544	7.5
chr7	64392207	64392878	671	both	0.000546	7.5
chr7	79659938	79660364	426	both	0.000548	7.5
chr4	128962487	128962701	214	both	0.000549	7.5
chr19	6306299	6306952	653	both	0.00055	7.5
chr12	51845037	51845344	307	both	0.000551	7.6
chr11	116138759	116139190	431	both	0.000551	7.6
chr17	46646037	46646384	347	both	0.000552	7.6
chr1	135430421	135430672	251	both	0.000553	7.6
chr1	105990232	105990711	479	both	0.000559	7.7
chr11	102375309	102376185	876	both	0.000562	7.7
chr11	97435002	97436251	1249	both	0.000563	7.7
chr2	181459471	181459816	345	both	0.000563	7.7
chr11	120727241	120727579	338	both	0.000564	7.7
chr5	66070003	66070203	200	both	0.000565	7.7
chr4	149485141	149485480	339	both	0.000566	7.8
chr6	124662698	124663246	548	both	0.000567	7.8
chr4	70534909	70535305	396	both	0.00057	7.8
chr9	124312467	124312847	380	both	0.00057	7.8
chr8	120475634	120475911	277	both	0.000572	7.8
chr11	78323004	78323249	245	both	0.000573	7.8
chr13	74563875	74564106	231	both	0.000573	7.9
chr2	68861345	68861642	297	both	0.000574	7.9
chr9	66059988	66060382	394	both	0.000576	7.9
chr1	136466163	136466504	341	both	0.000576	7.9
chr16	46010343	46010719	376	both	0.000577	7.9
chr13	62623960	62624384	424	both	0.000579	7.9
chr10	81292591	81293379	788	both	0.000581	8
chr6	134792701	134792859	158	both	0.000585	8
chr15	84412577	84412846	269	both	0.000592	8.1
chr7	98655772	98657049	1277	both	0.000592	8.1
chr5	110286145	110286534	389	both	0.000598	8.2
chr10	80398884	80399974	1090	both	0.0006	8.2
chr17	48409016	48410204	1188	both	0.000604	8.3
chr17	87672334	87672687	353	both	0.000606	8.3
chr14	57571472	57571801	329	both	0.000606	8.3
chr6	128355833	128356076	243	both	0.000606	8.3
chr12	83921830	83922291	461	both	0.000607	8.3
chr8	91133948	91134451	503	both	0.000608	8.3
chr5	77310057	77310612	555	both	0.000608	8.3
chr8	116993278	116993828	550	both	0.000608	8.3
chr4	152477535	152477893	358	both	0.000614	8.4
chr2	144555906	144556438	532	both	0.000614	8.4
chr1	180195946	180196299	353	both	0.000617	8.5
chr17	94834757	94835010	253	both	0.000618	8.5
chr11	111065902	111066241	339	both	0.000619	8.5
chr6	127453521	127453974	453	both	0.00062	8.5
chr11	95824218	95824628	410	both	0.000628	8.6
chr19	6084759	6085834	1075	both	0.000632	8.7
chr4	42999952	43000835	883	both	0.000634	8.7
chr4	109000446	109000937	491	both	0.000636	8.7
chr9	31211737	31212160	423	both	0.000636	8.7
chr9	21309326	21309524	198	both	0.00064	8.8
chr11	5261637	5261913	276	both	0.000643	8.8
chr5	113735587	113735981	394	both	0.000646	8.9
chr13	100786480	100786900	420	both	0.00065	8.9
chr7	143829625	143830336	711	both	0.000653	9
chr4	130359773	130360307	534	both	0.000654	9
chr15	94589781	94590129	348	both	0.000656	9
chr6	117916846	117917419	573	both	0.000657	9
chr3	136669807	136670277	470	both	0.000658	9
chr4	140906246	140906406	160	both	0.000658	9
chr4	122955459	122955751	292	both	0.000659	9
chr4	62360365	62360861	496	both	0.000661	9.1
chr13	113794217	113794690	473	both	0.000664	9.1
chr11	58903835	58904482	647	both	0.000664	9.1
chr16	15637308	15638020	712	both	0.000668	9.2
chr19	4096862	4097757	895	both	0.000671	9.2
chr10	80172903	80173320	417	both	0.000672	9.2
chr11	97187059	97188584	1525	both	0.000674	9.2
chr13	41605537	41605938	401	both	0.000675	9.3
chr8	85840663	85841071	408	both	0.00068	9.3
chr9	107635329	107635769	440	both	0.00068	9.3
chr4	143412650	143412944	294	both	0.000681	9.3
chr11	85352649	85353305	656	both	0.000682	9.4
chr7	100607317	100607916	599	both	0.000682	9.4
chr15	80710668	80711385	717	both	0.000683	9.4
chr5	100429473	100429857	384	both	0.000683	9.4
chr17	7169774	7170233	459	both	0.000691	9.5
chr7	120982264	120982640	376	both	0.000691	9.5
chr18	46958796	46959274	478	both	0.000692	9.5
chr10	5194716	5194972	256	both	0.000692	9.5
chr11	117654447	117654895	448	both	0.000692	9.5
chr15	100304139	100304989	850	both	0.000692	9.5
chr5	134184405	134184734	329	both	0.000693	9.5
chr14	24779164	24779352	188	both	0.000697	9.5
chr14	19823767	19824094	327	both	0.000697	9.6
chr14	65149853	65150323	470	both	0.000705	9.7
chr5	88764899	88765284	385	both	0.000707	9.7
chr9	108516910	108517751	841	both	0.000707	9.7
chr17	15564306	15564681	375	both	0.000713	9.8
chr11	4594767	4595109	342	both	0.000714	9.8
chr7	25316605	25316999	394	both	0.000715	9.8
chr4	149307695	149308069	374	both	0.000724	9.9
chr9	13826945	13827913	968	both	0.000728	10

## Sheet: MAST_PBX1_H3K4me1
Region	Start position of subregion relative to sequnces length	Sequence of subregion of containg motif match	Start position of motif match relative to sequnces length	Motif Index	Reverse complement	pvalue	Match pattern
chr8:57505000-57515000	1	ggagacggattgccctgttactcattgtgtttctatactggtggatttgggaaattccatactggtttgggaagt	15	3	n	6e-05	++++ + +++
chr8:57505000-57515000	226	ccaccaggggttccaggtaaaatgtgtttctatgtattgggagatgccacttaggaatggtgggctaggtggggt ggggaatgacatggtccacaggagggaggaaagcagggtgttctatcaggatctgctcattcccctggaatggga	293	2	y	2.6e-05	++ ++++ +++
chr8:57505000-57515000	1426	agcatggcactactgagctgaatcctcagctcTAGACTTGGCTTTGGCTTGAACATATTCATCAtttgtttgatt gattgtttgtttgtttgtttgCTCTAGGACTGGTTGTTCTATTTCTGAGATCTCTGAGACCCAGCCCACCAGGAA	1495	4	y	9.8e-05	++++++ ++
chr8:57505000-57515000	2851	ggactaagccaatgagaggctgactagccagagaggagtgtgtgagtgtgagtgtgtgtgtgtgtgtgtgtgtgt	2856	1	n	1.7e-06	+++++++ +++++
chr8:57505000-57515000	3001	agaagctctcagacaatggagtagttctcacacacctttattcctcctggatgagacccttagatacagttttgg ggtgggtcatggtctgaaggcaggtacttcccattgggttggtctgagagtttgggaataccttatctgcatgtg	3071	2	y	7.1e-05	++++ +++
chr8:57505000-57515000	3001	agaagctctcagacaatggagtagttctcacacacctttattcctcctggatgagacccttagatacagttttgg ggtgggtcatggtctgaaggcaggtacttcccattgggttggtctgagagtttgggaataccttatctgcatgtg	3102	1	y	6.2e-05	+++++ +++++ +
chr8:57505000-57515000	3151	ggagggcttggggtgctgcccctatgtgactgatggccacagacctctctatggggggactgtgggggactatgt	3177	3	y	9.2e-05	+++ +++ +
chr8:57505000-57515000	3526	CCATGATATGTAACATAAATAATATTACTATATTACTATTCATATATATGAAGTTACAGAAAAAAAATGAACACA	3539	4	n	1.8e-05	+++++++ ++
chr8:57505000-57515000	4201	gagatgactgtctccagggagctaggaggaagatctcaaagcccaccctcatattgagagacttcgtctaacaag	4242	2	n	5.4e-05	+++ +++ +
chr8:57505000-57515000	5176	aacttctggcttcttggacctttcactgttagtcagccattgttggaccacagcctataagtcgttctaataaat ctcctacatatagattcagtctattggttttgtttcgctagagaaccctgGTACACGTAACACTTAAATACATGA	5201	3	n	6.6e-05	++++ + +++
chr8:57505000-57515000	5176	aacttctggcttcttggacctttcactgttagtcagccattgttggaccacagcctataagtcgttctaataaat ctcctacatatagattcagtctattggttttgtttcgctagagaaccctgGTACACGTAACACTTAAATACATGA	5244	4	n	9.8e-05	+++++++ +
chr8:57505000-57515000	6076	GCCTGTTAGGACCGAGCCCTCCTTCCCCGGAAAGCAGCTTGACCGGCAAGGTGAGGGACCCTGGCCTCCCACCCG CGCCCGCGAAGTGTTGGGGTGCAGTGCGGCCAACCCGCAGATCTTAGGCGGGTCAGCTGTGGAAGACGCCGTCCC	6143	2	n	9.5e-05	+++ +++ + +
chr8:57505000-57515000	6226	GGCGCGGAGGCAGGCATGGCTCCGATCGGAGGGCGAGGGCTACTTTATTTATTTTTAAATCACTAGGGGACGCGG	6269	4	y	8.7e-05	++ ++++++
chr8:57505000-57515000	6301	CTAGGAGTCCGTGAGACTCTCCGCACAGTCTGAGGCTCCCCGCCCGCCGTGCTCCGGTTCCACCTCGGCCTCATC	6339	2	n	4.5e-05	+++++++ ++
chr8:57505000-57515000	6526	GCGCCAGGCGCCCTCCTTGCTAGTTTTAAATCTGGCCGGGGCAGTTCCTCTCGGGGCCTGCCCCACCCTCATGGC CAATCAGCAGCGGGCCCGCCATTTTTCAAACGCTTTTCCTGCCGCCAATCAGGGCCGAGCAGTACATTCCTCTCT	6597	1	n	1.1e-06	+++++++++++ ++
chr8:57505000-57515000	6526	GCGCCAGGCGCCCTCCTTGCTAGTTTTAAATCTGGCCGGGGCAGTTCCTCTCGGGGCCTGCCCCACCCTCATGGC CAATCAGCAGCGGGCCCGCCATTTTTCAAACGCTTTTCCTGCCGCCAATCAGGGCCGAGCAGTACATTCCTCTCT	6642	1	n	7.5e-06	+ +++++++++ ++
chr8:57505000-57515000	6751	GGGCCTGGCCAGACACCCACCAATCGGAAGCCTTCTCCGTGGGGGGGCGGGGACTCTCCGGGTTTGAATAATCCT	6767	1	n	2.1e-05	+ ++++++++++++
chr8:57505000-57515000	6751	GGGCCTGGCCAGACACCCACCAATCGGAAGCCTTCTCCGTGGGGGGGCGGGGACTCTCCGGGTTTGAATAATCCT	6791	2	y	1.7e-07	+++++++++++
chr8:57505000-57515000	6826	CCACAGCCAATCAGAGCGGAGGGAGGTGTGGCCCGCGACTGGTCTGGTCAAGTTGCCGTGGCGCGGAGAACTCTG	6829	1	n	1.4e-08	++++++++++++++
chr8:57505000-57515000	7276	CAGGGAgggcgcgcggccggcggcggcTTTCGGCCTCCGGGCGAGgggctgaggcgcgggcgggcgggcgagtcg	7333	2	y	3e-05	+++ +++++++
chr8:57505000-57515000	7351	ggcgggtcggagccggctggggctgggctgggccgggcctggccggggcgcgcGCTCCCGCGCTCGCTCGCGGGG GCGCGCGGGGTTTAGGCGGGAAGCGGAGCGGAATcccccccctccccgctgtccccgctcccctcccccacgctc	7420	2	y	8.8e-05	+ +++++++ +
chr8:57505000-57515000	7351	ggcgggtcggagccggctggggctgggctgggccgggcctggccggggcgcgcGCTCCCGCGCTCGCTCGCGGGG GCGCGCGGGGTTTAGGCGGGAAGCGGAGCGGAATcccccccctccccgctgtccccgctcccctcccccacgctc	7435	2	y	8.1e-05	+ ++++++
chr8:57505000-57515000	7501	ctcactccttgcagccccctccccGCGGGTCCCCACCCCGGTCCCCGGTCCGGACACGGCTTTCTCCTCGGCAGG	7532	2	n	7.1e-05	+++ ++++
chr8:57505000-57515000	7726	AGAAATGCTCCGAGAGATGGAAGGTGAGGGAGGGAGGGCGGGCGGCGCGCGTGCCCGGCTGCAGGCCGTTTCCGG	7757	2	y	1.9e-06	+++ +++++++
chr8:57505000-57515000	7801	GCTGCTTTTGGCGGGTCCCCGCGGGCGGGGGCGGGTCGGATGGGGGGGGGGGACGACAGGGACCAGGGAGCGCGC	7825	2	y	4.1e-07	+ +++++++++
chr8:57505000-57515000	8476	TTTAAATAATAACTGATATTTCTATATGATATATGTCAGCTGTAGGAACTTGGGATATTTGTTAACCACTGCCTG	8501	4	y	4.2e-05	+++++ ++++
chr13:37534000-37550000	1426	aggtagctgagagttctacatcCACATTCCCTGTCACTCCTGAGCCAGCCCAGTCCATCACTAAGGGACTGAAGT	1456	3	n	9.6e-05	++++++ ++
chr13:37534000-37550000	1951	TGTAATCTTTACTTTTTTTTCTTGACTGACtggttggttggttgattggttgattggttggttggttgattggtt	1973	3	y	8.4e-05	+++ ++++ +
chr13:37534000-37550000	2026	gattggttgattggttgattgattgattgatttggcttcatgtagctgaggttggccatgagcttctgatccact	2040	4	y	9.8e-05	++++++ ++
chr13:37534000-37550000	2626	GCCCTTTACTGTGCCTTTCCGACCACCCACAGTGCTTTCCAAGAGCCAATGATTTAAGAATACAAATCATTCACA	2674	4	y	8.7e-05	++++++++ +
chr13:37534000-37550000	3076	aagacagctacagtgtacttagatataataataaataaatcttaaaagaaaaaaaaaaAGAAATTGATTTTTGCC	3109	4	n	7.8e-05	+++++++ +
chr13:37534000-37550000	4951	tctgccatgaagaagctttttcatcccgccctcccaccttcacgatgctctgtcaagagaatggagccaagcagc	4975	2	n	1.9e-06	+++++++ +++
chr13:37534000-37550000	5176	CGTTAACTGACTGACAGGTGTCCCCATCACCCTCTTTCTCTGGCAGGCCTATTTTACACTATAATATTGTTCTGT	5183	3	y	2.9e-06	+++ ++++++
chr13:37534000-37550000	6301	TTGGAGAAATAGCAGCCACCTAACTCAGTTAGCCAATGAGAGCATGTAACAAGGGTACCAAGTCAACTGGGGCAG	6330	1	n	5e-08	++++++++ +++++
chr13:37534000-37550000	7726	GAGGGACATCTGGCCACAGTAGGTCCTTTTCCAATGAGTGACATTTCCTTGACGTGTCTGAGCTGACAAATGCTC	7760	3	y	2.7e-05	+++ +++++
chr13:37534000-37550000	8026	CCTTGGTCACGAATGTCTTGAAGACTGGAAAGGTTTTAATTTATATTTCCTCTACCCTTACTCCCCCTCCCCGCC CCCCAAGAAGCTTTTCTGGAGCAAATAAGGCCACATCGCATCAGTGTCCTGAGGAAGAGTCATGCAGATTGGGTG	8095	2	n	9.3e-07	++++++++++
chr13:37534000-37550000	8176	TACTCAGACCATAGACCCTCCAGGCATGTGGGAGTCGGGGGTGGGCAGAAGATGGGCAAGCCAGGAGTGTTTGCA	8210	2	y	1.5e-05	+++++ +++
chr13:37534000-37550000	8251	GGCTGGGTGGGAGGGCATGTTAAGGGTGATCGGAGCATGAGGTCAGCTGCAGCTGATAGAGGCTGCTGGCAAGAA	8251	2	y	7.1e-05	++ +++ +++
chr13:37534000-37550000	8326	TTGCTCTCCCACTCACCCTCATCGGTTGCCCATGGAGGCTGGGTGGTTTTGATGCACCCAATCAGCTGGTGGATC	8380	1	n	5.9e-05	++ ++++++++ +
chr13:37534000-37550000	8851	GTATTTGCATGGCCCCGCCCCCATCACTTCAAGTCACTAATGAGTCTTTGAGAGACTCATTTGACCACAACCATA	8864	2	n	3.3e-06	+++++++++
chr13:37534000-37550000	9976	AACCTCCAGCCTTGTGGCTTCCACCAAATTGCACCATCATCTCACTCCCTACCCGCCCAGACTGTGCAATTTGGG	10027	2	n	4.8e-05	+++++++ +
chr13:37534000-37550000	10351	cattccacctggaacataaatcatcctttcacctgctgcatccatgaagtatttgctaccctcccggtagttact	10365	4	n	1.6e-06	++++++++++
chr13:37534000-37550000	11101	ctgcagatgtgaggtctactATAAATCACTGAGTCCTAGGCTGCTTATGGGGATGCTTGTCTATCACAGCATCAC	11120	4	n	4.3e-05	+++++++++
chr13:37534000-37550000	11551	ACATGGAAGCAATACATAGTTTCATTCTAAAAATGAATGACCCACAAGTACCCACCTATTCTCTCCTTAACTGTC	11601	2	n	6.8e-05	+++ ++ ++
chr13:37534000-37550000	11851	tctttctttTTaagatttatttatttagtatatgtaaatacactgtagctgtctttagacactTTTTCTTCTCTC	11862	4	y	7.8e-05	+ +++++++
chr13:37534000-37550000	12001	tgagccaccatgtggttgctaggaGCAGTCAgccaatcagatggagcttattcctcagttgagggtccctcttcc	12030	1	n	1.5e-06	++++++++++++ +
chr13:37534000-37550000	12676	TGTTCCCTGCCAATCAAAGAGACCTGACCTGGCCATTGTAAACTCAAGCATGCTTTGTTTCCACCCGGAAGCTCC	12682	3	n	6e-06	+++ ++++++
chr13:37534000-37550000	13351	GCAGCTTTATCACACTGACTGCTAAGCATGGGGATCCAATAACAGGGAAAAGTGGGTGTCCTGAGGGGACAGGAC	13383	1	n	6.2e-05	+ +++++ + +++
chr13:37534000-37550000	14026	AAGATGAAGGAGACTTCATTGGTCAGTTCCCtgctgagtctcaaagccaagacaagcaattacggtgcatattta	14037	1	y	5.5e-05	+ + ++++++++
chr13:37534000-37550000	14326	cccccaccccagcctcttcctttctccttacaaggttcagggccatgatccctcccagatgtgtctgcctctggc	14328	2	n	3.9e-05	+++ ++++ +
chr13:37534000-37550000	14401	aatgctctctctttatctacaataaactttctcctctgccatatctgggaacagtcagtcatgtcctttcccttt	14452	3	n	8.4e-05	+ ++++ +++
chr13:37534000-37550000	15451	cataaataaaaatatatctttaaaaaatcaaaaaGAGAATAGTTGTTCTTTGGGGGGGGGTGTTGGTGGTAATGA	15451	4	n	2.9e-05	+++++++ ++
chr13:37534000-37550000	15826	tcccaccacctcccagtggtgccattggctggtaaccgagccttcaacacatgggcttctgggggaacagtctgc	15843	1	y	9.9e-05	+ + + ++++++++
chr13:37534000-37550000	15901	atccaaactacatcaCCAGACAAGTTCCTAAAGTCCTGACCAATCATATGATTCATTCACACAGATGAGAGAGAG	15937	1	n	4e-05	++++++++++ + +
chr4:46489000-46493000	151	CTAGAGGCGTAGGCAGCGCTGGAGGGGCGGGGCTTGCTTTTCTCCCCGCTCTCTGCAGAGGTAAGGCTCCGATTG GCTGTCGAGCGAGACGGGGCCCGCGGATTGGCTGCGCGACAGCCGCCGGCTGACGTGGCGGGGCTGAGACCTGCG	171	2	y	1.2e-06	++ ++++++++
chr4:46489000-46493000	151	CTAGAGGCGTAGGCAGCGCTGGAGGGGCGGGGCTTGCTTTTCTCCCCGCTCTCTGCAGAGGTAAGGCTCCGATTG GCTGTCGAGCGAGACGGGGCCCGCGGATTGGCTGCGCGACAGCCGCCGGCTGACGTGGCGGGGCTGAGACCTGCG	216	1	y	1e-07	++++++++++++++
chr4:46489000-46493000	151	CTAGAGGCGTAGGCAGCGCTGGAGGGGCGGGGCTTGCTTTTCTCCCCGCTCTCTGCAGAGGTAAGGCTCCGATTG GCTGTCGAGCGAGACGGGGCCCGCGGATTGGCTGCGCGACAGCCGCCGGCTGACGTGGCGGGGCTGAGACCTGCG	246	1	y	3.5e-05	++ + +++++++++
chr4:46489000-46493000	376	GCTGTGTCCCGGGCGCTGGGTGGGTGGAAAGCACCCGTGCTTCATCATCGCGGAGATCGGCCAGAACCACCAAGG	389	2	y	9.1e-05	+ +++ +++
chr4:46489000-46493000	451	AGACATAGATGTGGCCAAGCGCATGATCCGCACTGCCAAGGTGAGGGGCGGGGCCCGTGGAGGAGTAAGTAGCGG	492	2	y	4.7e-06	+ ++++++++
chr4:46489000-46493000	1051	AACTACAGCTGCTGAGATGCTTGTGACTACACGCCCACCCACTTCTCTTAGTAAGTTTCCACACGTTCAGTCCGA	1084	2	n	3.2e-05	+++ +++ ++
chr4:46489000-46493000	2176	CCTGCTTTTGATTGAAAGGGACAGCCTGTTTTTCCAAGGTGTGACCTCCTTGTATGGTGAGGTTGTAAAACCTAG	2184	3	y	5.2e-05	+++++++ ++
chr4:46489000-46493000	2476	cctcctaagtgcctgggattaaaggcacacaacactacctggtttaaagtgttttctcccctatgatttatttat	2538	4	y	1.1e-05	+++++++++
chr3:135672000-135695000	76	TTTTTTTTTTCAGTAATGCTGATTTCTAAAAGCTTTCTTTTAAAAATAAATCAATGTTTCTGTGCATGCTACCAC	120	4	n	1.6e-05	+++++++++
chr3:135672000-135695000	1576	gcgtgacaggaggttgtcagtcatcatgtgggagttaggaaccagcctgagtcctctgcaagagcagtaagcact	1589	3	n	6.6e-05	+++++ +++
chr3:135672000-135695000	1651	cttactagttaagccatctatctcttcagccATATTAAGTAGGCTACTAAAGGGTTACACACCTGTGCTGGGGGC TGGGTGGGCTGGGCTGGGTTGGAGTGCTGCCTGCCAGGATAACTGCTAACATTCAAGCTGTTCCTGTTGTTTTTT	1723	2	y	7.1e-05	++ +++ +++
chr3:135672000-135695000	3076	GCTTCTTCATGATTTATCTCGCCGCAGCAAAGGCTAGCCAATCAGAACGGTTAGTAAATGGAAAGACAGCAGCCT	3084	4	y	7.1e-05	+++++++++
chr3:135672000-135695000	3076	GCTTCTTCATGATTTATCTCGCCGCAGCAAAGGCTAGCCAATCAGAACGGTTAGTAAATGGAAAGACAGCAGCCT	3110	1	n	7.6e-09	++++++++++++++
chr3:135672000-135695000	3151	ACACGATACAGCTTGGTCAGTGTCATGGGAACAGAGGGCGTGTGGAGCATGGGTTAATTACCCTGGCAATTCAGT	3182	2	y	9.5e-05	++ +++++ +
chr3:135672000-135695000	3301	AATTGAACaaaaaataaataattttttttaaaaaaaGGAAAGAGCAAAAAGAAACAAAACAAAACAAAAAACCCA	3313	4	n	6.2e-05	++++++ ++
chr3:135672000-135695000	3901	ACTTTACTATAGGGAAATCAATCATTTAAAGATGCATTGCTTggccaacaagagggctctgcaggtaaaaacact	3916	4	n	6.5e-05	++ ++++++
chr3:135672000-135695000	4426	aaatgatttatactgaaaccagacagaaagggtcgctcacctatactcaattcccttcacattgaataccaagaa	4428	4	y	3.7e-05	+++++++++
chr3:135672000-135695000	4876	TCCACACAAATCTAATTTCAGTCATTATAAATCAACCACTATTTGATCTTGCCAAATTCATATGTAATTATGAAA	4901	4	n	5.1e-05	+++++++++
chr3:135672000-135695000	5026	AGGGCACTTTCTAATCCAGGCCACAGGAAGCAGAGTTCAAATAAAGAGCAGTGATCTCATTGGTCAGAGAAATGG	5078	1	y	8.3e-06	+ +++ ++++++++
chr3:135672000-135695000	5101	TATATGTGCAAAGCCTCAAAAATCTATAATCAGCCCACCTTTACTCTGATGAAATCCTAACAGAGATCCCAAAAA	5134	2	n	9.5e-05	+++ ++ +
chr3:135672000-135695000	7126	ttgcttcctgattgacgagcaggtagtttatgctttgccaggtgctctggccatgacatactatcacggtggacg	7134	3	y	9.2e-05	++++++++
chr3:135672000-135695000	7201	tctgcagtaacagactggtagactggaaccttcaaaactcatcaactaaacctttttttctttattcattaatca actcaggtattggtttatagtgacagaaagccgGTGAATACTTACATAATCTAAACATGATATTCAGAAGAAAAA	7267	4	n	1.1e-05	++++++++++
chr3:135672000-135695000	7801	GCTATGGAAAGTCTCTAAGGATCATAATAAATCAGATAAAAAGTTTTATCTTATAACTGAAGTAAGCCCTGCCTG	7826	4	n	4.9e-05	++++++++
chr3:135672000-135695000	8176	CTTTTCTGATTGATTTTGGGGTGGGTGGGGGTGTCTCAttttatggtgttggaggttgaatccaaaccttgaact	8194	2	y	1.7e-05	+++ +++ +++
chr3:135672000-135695000	8251	gagttggcgagtgttctaccaatcacctacatttccaagcccTGTGTCCTGAAAGAAAGGATTGATTGTGTGAAT	8266	3	n	3.8e-05	++ ++++++
chr3:135672000-135695000	9001	GGGGTTTCTGGCATGTGTTGCCATGCCTTGATTTACTGTCAGGTGAGTGAATGTGAGTGACAGGACCAATGTTTA	9054	3	y	2e-06	+++ ++++++
chr3:135672000-135695000	10426	ACCAGTAGGGTGAGCACAAAAGAAAATCCTCTCTTGCAAATGTATTAAGGAGTTTCAGGGGGTGGGGGTGGGGCA	10481	2	y	4.7e-06	++++++ +++
chr3:135672000-135695000	10726	TGCAGATCAAGAGACTCTAGGAGCAACTGAAGGAGAAGGTGGGGTTTAGGAAGGAAGGGCTGTTAGGCTCTGAGA	10758	2	y	3.2e-05	+++ ++ +++
chr3:135672000-135695000	11101	TTGGCTATCACAGCAGACTTTCTAAGAGAAGGAGGGTGTTTCCCCCACCCATCAGGAACAAGAAAGAGAGAAAGA	11144	2	n	6.5e-05	+++ +++ +
chr3:135672000-135695000	12151	ACCCCACCCCCACCCCTATGAGTGGCCATCCACATTTCATCTGGCCCTCCACACTGTCTTTCTTTACATTTCTAA	12153	2	n	7.7e-06	+++ +++++ +
chr3:135672000-135695000	12376	ACATTAATAAATGTAATTATTTAAAACGTTCACCATAGGTAGAGCTTTGTACTAGATGCTACTGTCTTCTATACC	12377	4	n	6.2e-05	+++++++ ++
chr3:135672000-135695000	12676	aggtaacccaatcacaaaagaactcacatgatatgcactcactgataagtagatattagcccagaaacttagaat	12680	1	n	5.9e-05	+ +++++++ ++
chr3:135672000-135695000	13276	ttggtggggaagggagcagggtggggcgagggcatagggatagcatttgaaatgtaaatgaagaaaatacctaat	13290	2	y	9.8e-05	+ +++ +++
chr3:135672000-135695000	13801	TAAGCCCGCTACAGAGACTCTACTGAGCCTTGCTTATCAACAGGTTTACACTGAAGGGGAAAAAAATAAAATAAA CCAATGAGTGTTAAATCTAATATGTATGGCTATGCATATGTCTCTGACGAGCACAGCGTCTAGAACAAGTTACAG	13873	1	n	4.9e-05	+++++++ ++ +
chr3:135672000-135695000	14026	TTTGAGGTAGCAGCATTAGCGGGAAGACACAGGCAGTGTGCTTGGGTTGTATACACTTTTAACTGACAACCGCTG CCAATCATTTCCACAGCCCCTCTCAGCAAAGACAGCTTCCCATGCAAACACTTACATTCTCTTGAGTGTGTTGGC	14098	3	n	6e-06	+++ ++++++
chr3:135672000-135695000	14551	GGGGCTGACTTGAGGGAGGCGGGTAGGCAAGGTCACCACAAGGTGAAAGTGAGGCACAGAAGGCCTCCTAGGGTT	14563	2	y	6.1e-06	+++ ++++++
chr3:135672000-135695000	15901	AAGAATGCCTTtcctcccctccctccttccctcccgccctccttccctccTGTCTTCTTTATCTCTCCATCTCTC	15933	2	n	7.7e-06	+++++++ ++
chr3:135672000-135695000	16951	CAGAACTCTCCCCCTCTTCAGAGCAGGGGAATACCTCATAAATAAATTAGGCGAAACCATGGCTTGCTGATTGAA	16987	4	n	2.9e-05	+++++++ ++
chr3:135672000-135695000	18751	TGTGCACTGCACCAAGCACCTTTCTATCTGTCCTAGGCCGGTGGCGGACCTCAGCCTGGCCGCCACCACCCCACC CCAACCCCGCCGCAGGGGCTTGGGTACATCTTTCTAAAACTTTGCAAGAGTTCCTCTCCGCTTCCCGTTCCCGCC CGCGGAGACGCCGAGGGCCCCGCCAGCCGGCCCGCAAGGCCTCGGGGCCGCCCAGTGCGGATGTGCCCTTTCCCC	18820	2	n	4.5e-05	+++ ++++ +
chr3:135672000-135695000	18751	TGTGCACTGCACCAAGCACCTTTCTATCTGTCCTAGGCCGGTGGCGGACCTCAGCCTGGCCGCCACCACCCCACC CCAACCCCGCCGCAGGGGCTTGGGTACATCTTTCTAAAACTTTGCAAGAGTTCCTCTCCGCTTCCCGTTCCCGCC CGCGGAGACGCCGAGGGCCCCGCCAGCCGGCCCGCAAGGCCTCGGGGCCGCCCAGTGCGGATGTGCCCTTTCCCC	18895	2	n	6.2e-05	+++++++ +
chr3:135672000-135695000	19201	GGTCGGGGCgcgggcgggcgggcgggcggCTCAgcggcgcgccatggctgcggcgcgggcggagaagcgcggggc gggccgggcgcggcggggcCCTGAGCTCCGGCCTGCGCTGCTAGAGCCGGCCCGCGAGCAGGCCGAGggcggcgg	19212	2	y	3e-05	+++ +++++++
chr3:135672000-135695000	19201	GGTCGGGGCgcgggcgggcgggcgggcggCTCAgcggcgcgccatggctgcggcgcgggcggagaagcgcggggc gggccgggcgcggcggggcCCTGAGCTCCGGCCTGCGCTGCTAGAGCCGGCCCGCGAGCAGGCCGAGggcggcgg	19268	2	y	1.1e-05	+ ++++++++
chr3:135672000-135695000	19501	CTGGCTGGAAATTCCCACTGACGTCGAGAGAGAGCAGACAGACGGACGGACCCACGCGCGCGCGCACAGCGGGGG CGGGAGGTGGGGTCGCCTCCGGGGGTGGGGGAAGCCCGCGCGCCCCGACCCGGCGCCCCGAACCCCAAgccccgc	19569	2	y	4.1e-07	+ +++++++++
chr3:135672000-135695000	19501	CTGGCTGGAAATTCCCACTGACGTCGAGAGAGAGCAGACAGACGGACGGACCCACGCGCGCGCGCACAGCGGGGG CGGGAGGTGGGGTCGCCTCCGGGGGTGGGGGAAGCCCGCGCGCCCCGACCCGGCGCCCCGAACCCCAAgccccgc	19594	2	y	1.1e-05	+++++ +++
chr3:135672000-135695000	19951	TGGATGGAATTAGAGCGACAGTGAGACCCGCAGTGTTGGTTCACAGCTCATAAATCCTTATCCGGCTCAAGGGAG	19999	4	n	4.2e-05	++++++++ +
chr3:135672000-135695000	20476	AAGACAACGATGGTTGTTATTATTTATGGGACATTAGAAATTGTAACCTACGGGCCTGGGAAATGACTCAACAGA	20494	4	y	1.8e-05	++ +++++++
chr3:135672000-135695000	20551	GTGGTCGTTGGGATCTTTAGCATTCCTGCAGGTGGGGGTATCTGTAACCTCAGCGGACAGTTGGACCTGGAACTC ATTGGATAACTAACAAAGCCAAGCGCTGAGTGACAGAAAGTGACAAACACAGACCTCTGTgagagagagtggggg tgggggggacagagggagggggagggggagagggCAAGAACTGTGTCCTTGTTACTATTTAGCACATTGCTATAT	20620	1	y	6.6e-05	+ ++ +++++ ++
chr3:135672000-135695000	20551	GTGGTCGTTGGGATCTTTAGCATTCCTGCAGGTGGGGGTATCTGTAACCTCAGCGGACAGTTGGACCTGGAACTC ATTGGATAACTAACAAAGCCAAGCGCTGAGTGACAGAAAGTGACAAACACAGACCTCTGTgagagagagtggggg tgggggggacagagggagggggagggggagagggCAAGAACTGTGTCCTTGTTACTATTTAGCACATTGCTATAT	20652	3	y	2e-06	+++ ++++++
chr3:135672000-135695000	20551	GTGGTCGTTGGGATCTTTAGCATTCCTGCAGGTGGGGGTATCTGTAACCTCAGCGGACAGTTGGACCTGGAACTC ATTGGATAACTAACAAAGCCAAGCGCTGAGTGACAGAAAGTGACAAACACAGACCTCTGTgagagagagtggggg tgggggggacagagggagggggagggggagagggCAAGAACTGTGTCCTTGTTACTATTTAGCACATTGCTATAT	20694	2	y	7.7e-06	+ +++++ +++
chr3:135672000-135695000	20926	TCAAAGGCACATAAATAAGACTGTTACAAAGGTAGAGGCAATGGGATATACTACTAGAACACAAGTTGAAGACTG	20935	4	n	8.7e-05	+++++++ +
chr3:135672000-135695000	21301	AACCCCTTCCCTGTGCTTCCTCTCATCTGGATCCAAAGAGACCTGCCTTTCTTTTATTTAAAAGATTTATTTTAA	21362	4	y	7.8e-05	+ +++++++
chr2:91918000-91927000	451	GGTGAACAGGTCCTCAGGAGTGGGGGTGTAGGCTGGCCCGCCCCCAGCATGTCCATCAAGCTCCCCCCTCCACAA	487	2	n	1.9e-06	+++++++++
chr2:91918000-91927000	676	GTTTTTAGTGGCGAAATCAAGGCTCTGATCATTTTGTTTTTAGTATGAAAATGTGATTTCCTTTCTGTTTGTCAC TCATCATAGAAACATTGTGGTGGGAGGAGAGGGGATAGTCTACTGCTAATGAGGGAGACACCAAAGATCTACATC	744	3	n	6e-05	+++++ +++
chr2:91918000-91927000	1051	CATGATGGAGAGAGTCATCCATATTGCTTCCTGCCAGGAGTGACAGCTGAGTCACCAAAATCTTGATTCTCTGTC	1087	3	y	9.6e-05	++ ++++++
chr2:91918000-91927000	1651	AAATCCAAGGAACTGCCAGCAGCTGGACTACCACAGGTAGGATACTGGGTGGAGGTGGGGATGGTGAGAATTACA	1699	2	y	2.4e-05	+ ++ ++ +++
chr2:91918000-91927000	1951	AATCAATCAAACCACTGCAACTCGCAGAGTACAGGCATCTTGAGACCTGCCTTCCTTTAAGGGAAAGAAGTTGAA	1951	4	n	9.8e-05	++ ++++++
chr2:91918000-91927000	2176	AAGTAATGACTTCAGTTATCAGGACCACGTGACTAACAGCCAAGGTACACACAGCTGGGTCTGTCATCAACACAG	2205	3	y	6.6e-05	+++ + ++++
chr2:91918000-91927000	2326	GTGGTCTAAAAGTGAGCATGCCTTAACTACCCGTTCTGATTGGTTAGTCATACCTTGTCTCCACACCAGTTCCTT	2358	1	y	5e-08	++++++++++++++
chr2:91918000-91927000	2551	CTAAATTGGGTCCCCTAGTTCCAGCTCAGCTTTCCAGAGTTCACCCGTGAGCTCTGAGATGTAGGTGGGTGAGGT	2609	2	y	9.8e-05	+ ++ +++
chr2:91918000-91927000	3826	TAGGGCGGAGGCGGGGCTCATAGCCAAGCTTGGCCGCCTGGTTCTTCCCCAGCCCGCGAGGGGGCGCCTAGTCCC	3830	2	y	3.3e-06	+ ++ ++++++
chr2:91918000-91927000	3901	CATGACAACGCGGACAGCCCCCACCCCACCCCCCGGAGGGCAGAGCCGGAGGCTAATCCTCCCTGGCGACTGTGG	3925	2	n	6.1e-06	+++ ++++++
chr2:91918000-91927000	4051	ACTCCAGGTGGTGACCCCCGCGCGTCGCCGCTGGGTGACCGGCCCCGGGCGGGCGGTGCGTCCCCACCACGATTG GCTGCTTCCCTGTGACATCACGCGGCTCGGAGAAAAGTGCGAGCGTGAGCGCGAGTCGGAGCCACAGCGCCGGGA	4116	1	y	3.8e-05	+ ++++++++++
chr2:91918000-91927000	4201	GCTGCAGGCGAAGCAGGGGCCGCCCCTTGGCACCCTGTccccgcccccggcccccggcccAGTCGCCCACCCCAC CGACTCGCAGGGCCTCTGGCTAGTTCCGCCGTCTGTCCGGCGCCAGCGGAGCAAGACAGAAGCAGCGGGTGAGTA	4240	2	n	1.5e-06	+++++++++
chr2:91918000-91927000	4201	GCTGCAGGCGAAGCAGGGGCCGCCCCTTGGCACCCTGTccccgcccccggcccccggcccAGTCGCCCACCCCAC CGACTCGCAGGGCCTCTGGCTAGTTCCGCCGTCTGTCCGGCGCCAGCGGAGCAAGACAGAAGCAGCGGGTGAGTA	4266	2	n	2.6e-05	+++ ++++ ++
chr2:91918000-91927000	4351	ACTCCGCGGAATCGCGGGGGCGGGGGGCTTCTATGCAAGATGAGGATGTAGGGTTCTGGGACCCCCTGAAGGTCT	4364	2	y	4.1e-07	+ +++++++++
chr2:91918000-91927000	4426	CCAGAGGTGGGTCGGGCTGGAACAGGGCCCCAGACCCCTTTGAAAGGCAAGCGCGGTGCGGAAGGGGCGGAGAGC	4426	2	y	6.2e-05	+ ++ +++
chr2:91918000-91927000	4726	TTTCCCGCCCGTCTCCCTGCCCTCCGTTCCCACCTTGGCCCACCGGGAGCCTCCAGTACGCTCTAGCCCGTTGGA	4729	2	n	9.1e-05	+++++++ +
chr2:91918000-91927000	5176	TACAGGAACTGCGTGCCTGGGGGTTGATGGGAGGGCGGGGCATCGGAGAACCTTGGCCCTTTCGACCAGGACCCA	5204	2	y	1.9e-06	+++ +++++++
chr2:91918000-91927000	5326	TGGGAACTCGGTGCCTATTTTGACTGACAGGACTAGACAGGGCCTCTCCAGGGGTTGCGGGTTGAAGAGTGAAGA	5346	3	y	2.9e-06	+++ ++++++
chr2:91918000-91927000	5626	CCAAAGTCAGGGTTTCTTCGCAGCCCAAATTTTGCTCCTTTCTCAACCCTTTCCCCACCCACAGACCGGGCGCTT	5679	2	n	4.8e-05	+++ +++ +
chr2:91918000-91927000	5926	TCGAGCTCCCGAGTAGTCACACACAAACACAACTCGCACTCGTTTTCCCACCTACACGTTCCTTGATGGGTGCCT	5972	2	n	6.5e-05	+++ ++ + +
chr2:91918000-91927000	6226	GGACCGACATTGCCATCTAGCGGTGCTCACAGGCCAGGGTGATGGCTGCTTGCCTTCTCGGATTCTAGATGGGCG GGATTTGGGGGGGGGGGGGAGGCAGAGAATTGTGCCTGAAGGTGCTGTGGTCTGAACATCTGAGAGACTATCAGA	6292	2	y	2.6e-05	+ +++++++
chr2:91918000-91927000	6826	CTTGCCCCCCACCTCCCCACCTTCATCTTCTTATCCTGCTGGCTGCTGGCTGTGCTCTGGTCCTGAGAGACTAAA	6833	2	n	1.1e-05	+++ ++ ++++
chr2:91918000-91927000	6901	GTGAAGGTTTCCTTGGTGCATGCTAATGGCTCCCCTACTGCCTCGTCCCTGTCCCTGCCAGTGGGTATTTGGGGT GGGGTGAGGTAGGGAGAACAGCCTCTATGCTTGATGCTACCCTCCAAGCATCTGATGCTTAAGGCCCCATTTTGG	6968	2	y	7.1e-05	++++ +++
chr2:91918000-91927000	8026	TCTTCCTCTTCCAGGTGTCCCAGCTCCCACCTCACCTCCTCTGGTCGCTAGCGTGACCTCCCTAGCCCTTAGAAC	8051	2	n	5.7e-05	+++ ++ + ++
chr2:91918000-91927000	8326	TGTAGGAATGGGAGAACAAATCTCCCTTGGCCACGATTGGTTAAGAAATGTCCACGTGgctggacatggtggagc	8355	1	y	1.9e-05	++ ++++++++++
chr4:123398000-123402000	751	tcaatccTTGGTATGGAGGGGTGGGGGTGGGTGGGGGCAGGATTGTGTGATGTATTTTAGTAAAACTTCACTTGA	771	2	y	7.7e-06	+ +++++ +++
chr4:123398000-123402000	1801	TACAGTACCATGACTGTCACTGTATTATTGACAGGTAACTTCCTTTGAATTAAGAGACAAGTACATTTgccagga	1825	3	y	7.8e-05	+ ++++++++
chr4:123398000-123402000	3076	CATAATGAAACCCATTATTATGTATAATTAACATGCTAACATTAATCAAATAGGACAAAAATATAGACAACTCAT	3115	4	n	1.1e-05	++++++++++
chr4:123398000-123402000	3301	TCTACTGAAACTCCGGACTTGGTCCTTAAGCTATAAACAATGTGCTGTCTGTCACTGTCTGCTTAGTTCGCCGTC	3345	3	n	6.6e-05	+++++ +++
chr4:123398000-123402000	3376	TCCACATTCCCACTTACCTTCTGTTCTTGGATCTGTGCTTTCACCACTTTATACTCAGCAGATGGAGGCTTCTGA TTGGCTATGAGCTCCTCAGTATCTGTCAACCAGCTGAGCAAAGGCTCTAAGGCATCTTGAAATTTCCCACAATGT	3444	1	y	3.1e-08	++++++++++++++
chr4:123398000-123402000	3376	TCCACATTCCCACTTACCTTCTGTTCTTGGATCTGTGCTTTCACCACTTTATACTCAGCAGATGGAGGCTTCTGA TTGGCTATGAGCTCCTCAGTATCTGTCAACCAGCTGAGCAAAGGCTCTAAGGCATCTTGAAATTTCCCACAATGT	3473	3	n	3.3e-05	+++++++ ++
chr16:11497000-11499000	226	ctgtaagctcttatcagggatgctttgtccccagcaggtggtgagtgacagtttggagggttatggggcatctag gaggtggggtgtggctgatgtgggtggtcatgcagggtgttcatttgaaggttttgcttactactgtctttacct	267	3	y	2e-06	+++ ++++++
chr16:11497000-11499000	226	ctgtaagctcttatcagggatgctttgtccccagcaggtggtgagtgacagtttggagggttatggggcatctag gaggtggggtgtggctgatgtgggtggtcatgcagggtgttcatttgaaggttttgcttactactgtctttacct	298	2	y	2.2e-05	+++ ++ +++
chr16:11497000-11499000	451	catccaccatagtggactaaaattcccttaaactgggaaccaatcggagccaaaactagctgtccctccattagg	487	1	n	1.7e-06	+++++++++++++
chr16:11497000-11499000	901	gggtgcccacagtgatctggtcccttccacatcaatcattaattgagaaaatgcccctgctgacttgcctacagg	930	4	n	2.1e-05	+++ ++++++
chr4:118425000-118438000	2101	TAGGAAAGACAGATTTCATGCCATGCAATAGTTGGACTATCTGGTGCTGGGGTGGGTGGGTGGTGGTACTGAATT	2150	2	y	1.7e-05	+++ +++ +++
chr4:118425000-118438000	2176	GACATCTAACTCCTCCCCCACCCCTACCCCTGCAACGTTGTCTGGCTTTCCCAACCCCATCTGTTACCTCTTCAG	2192	2	n	2.2e-05	+++ ++++ +
chr4:118425000-118438000	2476	ATTTCACTTGCTACCCCCACCCCCACCCCCTTTCACTACCTTGAAGGCCAGTTTAGACAGTGATTCACAGTTCTT	2491	2	n	7.7e-06	+++ +++++ +
chr4:118425000-118438000	2476	ATTTCACTTGCTACCCCCACCCCCACCCCCTTTCACTACCTTGAAGGCCAGTTTAGACAGTGATTCACAGTTCTT	2536	3	y	7.4e-05	+++++ ++++
chr4:118425000-118438000	2926	GAGAGATGCGAAGGAAGGGGTGGAGAGCTGGGGCTGGGTGTGCTTCCTGCCCCGGGATCTGGCGACCCGCCCCTG CTCCCGCCCTGGCGGCCAGGCAGGCGCTGGACGGCCCCTCCTGCCTCGGCCAGCCGCCCAATCAGCAggcgcccc	2991	2	n	2.8e-06	++++++++ +
chr4:118425000-118438000	2926	GAGAGATGCGAAGGAAGGGGTGGAGAGCTGGGGCTGGGTGTGCTTCCTGCCCCGGGATCTGGCGACCCGCCCCTG CTCCCGCCCTGGCGGCCAGGCAGGCGCTGGACGGCCCCTCCTGCCTCGGCCAGCCGCCCAATCAGCAggcgcccc	3003	2	n	3.7e-05	+++++++ +
chr4:118425000-118438000	2926	GAGAGATGCGAAGGAAGGGGTGGAGAGCTGGGGCTGGGTGTGCTTCCTGCCCCGGGATCTGGCGACCCGCCCCTG CTCCCGCCCTGGCGGCCAGGCAGGCGCTGGACGGCCCCTCCTGCCTCGGCCAGCCGCCCAATCAGCAggcgcccc	3055	1	n	3.5e-05	++ ++++++++ ++
chr4:118425000-118438000	3076	ccgcccggcccgcccccTCCCCCTCTGGTGACAGAAAGTCGGCCCAGCAGATGAGGAAGTGGCCGGCAGGCGGCC	3084	2	n	9.2e-08	+++++++++++
chr4:118425000-118438000	3301	tgccctgcccAGGCTGTGGGCGAGGCTGTTCCTGGGGCGAGTGGGTGGGAGGTCCCAGGCACTGGGGCTGGGCCT	3339	2	y	1.4e-05	+++ +++ +++
chr4:118425000-118438000	3751	AGTGCTAGGCCCCACTCCAACATAAGCCACCAACCAAAGTCTAACTGTAGGAAGAAATGAGTGTCACTCACCAGA	3811	3	n	4.7e-05	+++++ +++
chr4:118425000-118438000	4276	GGAGGGGACCTAGCCCATGAGGCTCCCTCCCAGAAGAGGGAAAGATTCCTGAGACCTCCCCCACTCTCCCACCTC CTCACATACCACTGGTGTCCTCACCCCTCCCTGGTAGGGAAGGGTGATGCCCATTCTAAAGTAGGACAAACTAAG	4343	2	n	9.5e-06	+++ ++ ++++
chr4:118425000-118438000	4576	AATTCTGGTGGGTCCTGCTCCTCTAGGCATTGACCTGTGGCCTGGACCCACCCTCCACCCCATGCCCAACGTAGC GGGGGCGGGAGGAGGGCGGGGCTGCTACAAGATCTAGTCAGACAGGTGGAGCCGCCAGGGCAGGAGTCTCAAAGA	4622	2	n	3e-05	+++ +++ ++
chr4:118425000-118438000	4576	AATTCTGGTGGGTCCTGCTCCTCTAGGCATTGACCTGTGGCCTGGACCCACCCTCCACCCCATGCCCAACGTAGC GGGGGCGGGAGGAGGGCGGGGCTGCTACAAGATCTAGTCAGACAGGTGGAGCCGCCAGGGCAGGAGTCTCAAAGA	4649	2	y	4.1e-07	+ +++++++++
chr4:118425000-118438000	4576	AATTCTGGTGGGTCCTGCTCCTCTAGGCATTGACCTGTGGCCTGGACCCACCCTCCACCCCATGCCCAACGTAGC GGGGGCGGGAGGAGGGCGGGGCTGCTACAAGATCTAGTCAGACAGGTGGAGCCGCCAGGGCAGGAGTCTCAAAGA	4660	2	y	7.7e-06	++ +++++++
chr4:118425000-118438000	5176	AGGAAGGCAGGGAAGGGAAACACTCGAAGAGAGTGGAGGGGAAAGGTGGGACAGCTCCATCCAGGCAGGCCGGAT	5215	2	y	6.8e-05	++ ++ +++
chr4:118425000-118438000	6676	TGGCCCTGTGGCCCAGCCCTACCTTTGGTGGAAGAAACATATGACTGCCATTCAGCTGGTGAGGAGCCTGTTGGG	6720	3	n	7.8e-05	+++ ++ +++
chr4:118425000-118438000	10126	caccatctcctggagactccctcctggtgacctcacctcttttcccacccatcttaaactctcctccccagctac	10169	2	n	6.8e-05	+++ +++ +
chr4:118425000-118438000	10201	aggttgatcagctctttattagccaatcagaggtgataacaattttcaaacaactccaagacaggagctgcttca	10220	1	n	1.4e-08	++++++++++++++
chr4:118425000-118438000	10351	caaaaccatctctcaacTCTAAGTGTCACAATTAAACTCAACCCCGCCTTGTCCTCTCCTCTTAGTAGTCCCTCG	10393	2	n	4.8e-05	++++++ ++
chr4:118425000-118438000	11476	GACACCAGCCTCGATGATGTCACTCACTCCTTACCTTCTGGGGCATTCTGAGGTTTGCCGCTGAGCCTGAGGATC	11492	3	n	2.7e-05	+++++ +++
chr4:118425000-118438000	12301	AGGACACGCCGGACTGTTGTTCTTAAACTCTCCGCTGCTAGCGTTCATTGGCTCCTTCAAAACCCAACTGTCTTA	12341	1	y	1.4e-05	++ + +++++++
chr4:118425000-118438000	12376	ACCGTCGCCCTTGCCGATTGGTCGCTACACTGAAGAGGGCCGGGTCTTCCGGGAGCAAATCTCACGAGAGTGCGA	12386	1	y	1.8e-05	+ +++++++++++
chr4:118425000-118438000	12526	GGAACACGGGGGCGGGTCCCGCACAGTTAGTCCTCGGGATCCGCTCTCTGCCGGCCATCTCTCTGGGTTGGGCCC	12531	2	y	2.5e-06	+++++++++
chr17:24217000-24223000	1	cagtaaatggctggggcttctgattggacagaagagaaggagggggcggggctggaaagtgagtgagtgagtaat	17	1	y	3.4e-06	+++++++++++ ++
chr17:24217000-24223000	1	cagtaaatggctggggcttctgattggacagaagagaaggagggggcggggctggaaagtgagtgagtgagtaat	40	2	y	9.2e-08	+++++++++++
chr17:24217000-24223000	151	acagagcagaggcatccatggagacaagattggcatgtgactgacatttgtgtggttttaacagacggaagaatt	188	3	y	3e-05	+++ +++++
chr17:24217000-24223000	526	tacaaccagtcatgggacagaaactcccaatagttatttatgaacaaaaagaggtataacagcccccCCACACAC	558	4	y	2.3e-05	++ +++++++
chr17:24217000-24223000	1276	CAAAGGCACACCAGAGGAACAAAGTTATTTTAACCAACCAGAGTATAGCTTAAGAGGCAGGGGAAGTGATGGGCA GGGGCATATCCCCTTAGGTGTATGGCTTTGCTAGATGGCAGGAGGAGGCAACCGAAGCCTCAGAGAACCTAGAGA	1342	3	y	9.6e-05	++++ + +++
chr17:24217000-24223000	2476	GGCGAACCTTCTCACCTCCTCTCCTTTAACAGCTTAATTCTGACAAGCTTTTTGAAAACGGCTTCTGGAGGAGGG TGGGTGCTCGCCCAGTCCAGAGAGCTCATGGGCTGGTTAGGCTCCAGAACGACAAACCTGATACCATCCCAACCC	2544	2	y	3.2e-05	++ +++ +++
chr17:24217000-24223000	4876	aggtcctctggtcaagcagcaaatgctacaaaccaatgagctgcctctgcagcctcCTTCTCCCACCTCTTAGAA	4905	1	n	5.2e-05	+++++++ ++ +
chr17:24217000-24223000	4876	aggtcctctggtcaagcagcaaatgctacaaaccaatgagctgcctctgcagcctcCTTCTCCCACCTCTTAGAA	4937	2	n	4.8e-05	+++ ++ + +
chr17:24217000-24223000	5851	CAGCTGCCTCATAAATCACAAGGCAAAGCATTCGCTGACATGCTCAAAGGGACCAGACCCTGCTGGTTTCTCCCC	5860	4	n	3e-06	++++++++++
chr2:166042000-166045000	751	TATCTGCTTGCTAGGCTTTGGCTTCACACAGTATCTATGCTGACCAGATCTATTTAAGACAATGAGTGATGGGAT	813	3	y	8.4e-05	+++ +++ +
chr2:166042000-166045000	826	TGTCTCACACTTTGTGATTTATGAAAATTGATAATTTTTTCACATTTACTATGTCTTTGTCTGTGTTCAAGTGCA	839	4	y	3e-06	++++++++++
chr2:166042000-166045000	1051	AATTGTAGCCTACAACCTCTTATTGGGTGCGGAACAACCTGTTTtatctatctatctatctatctatctatctat	1066	1	y	2.6e-05	+++++ +++++ ++
chr2:166042000-166045000	1576	tgcccagtactCCCAAATTCGTGTATCACCCCCCTCCCCCCAACACAGGGGGCGGGGGTTTATAAGTGTACATGA	1621	2	y	2.6e-07	++++++++++
chr2:166042000-166045000	1726	CCGAAGCACCTTTAAAAAAAGATTTAttaatttttgctttatggttgttctgcctacacattatgtttgtggatc	1744	4	y	7.8e-05	+ +++++++
chr2:166042000-166045000	1876	tgcgttttggaaattgaacccaggtTTCCAGCCCCTAAAATACTTTTTTTTTTGTTTTGTCTTTCCTCCCCCACC CCagacaaggtttttctgtgtagctcttgcagtcctggaactttctcttatagaacaggctgaccttaaactcaa	1945	2	n	6.5e-05	+++ ++++
chr2:166042000-166045000	2251	agcagacgttaagtactcttaactgatgagccatctctccagcctcAAaatactatttttaattgaatcagtgac tgacaatctatgggtttcaagtttgtatatttggcagacaatgttttgaaagtgataaggtaaactcgctctttg	2322	3	y	6.6e-05	+++ +++++
chr2:166042000-166045000	2401	gaggtgaagtctgatggccaatgataacatttgaacATGATATTGGTGAATTTGATTCATTACTAAATGTCTTCT	2415	1	n	1e-05	++++++++ + +++
chr19:7476000-7493000	601	CTAGTTCATACAGATGATGTGTACTTTAGCCCTTCACATTAATCACTACTATTACTTGCTAACATTCACTATAGG	637	4	n	7.5e-06	++++++++++
chr19:7476000-7493000	676	CAAAGTATGTGTGCTTAAttttcttttttttaaaaagatttatttatttattatatgtaagtacattgtagctgt	710	4	y	7.8e-05	+ +++++++
chr19:7476000-7493000	1276	cagtgaagccccctgtctTTttttttctttttttagatttatgtattatatatgcagtggcctgcctttatgtat	1309	4	y	4.2e-05	+ ++++++++
chr19:7476000-7493000	1576	GTTGGTAAATGTATGATGCTACCATGGATATAGTCAGGAATGAATGTAATACTGACATTAATAAAAACAAGTGGT	1631	4	n	6.2e-05	+++++++ ++
chr19:7476000-7493000	1651	AGGATCCTTATAATTTAAGGGTTAATACGGTAAATCCAAATTACAGAGTTAATGTTTGACTGACTGTTAGAACAA	1707	3	y	8.4e-05	+++ ++++ +
chr19:7476000-7493000	2401	TAAAGAAATCACTATTTCTAAACTTACTGGACAGGTCAGTCAAAATTGAACTTAGTAAAGAACACGGAGTAAGAC TGACAGCAATGTTTGCATGTTTTTCCTACAACCACAGCTCATATGATCTGCTGATTAGGATTTCCATGTAATCAG	2472	3	y	6.6e-05	++ ++++++
chr19:7476000-7493000	3151	gaggcccattggacacgcaaactttatatgccccagtacaggggaacgccagggccaaaaagggggagtgggtgg gtaggggagtgggggtgggtgggtatgggggacttttggtatagcattggaaatgtaaatgagctaaatacctaa	3216	2	y	1.4e-05	+++ +++ +++
chr19:7476000-7493000	3151	gaggcccattggacacgcaaactttatatgccccagtacaggggaacgccagggccaaaaagggggagtgggtgg gtaggggagtgggggtgggtgggtatgggggacttttggtatagcattggaaatgtaaatgagctaaatacctaa	3234	2	y	7.7e-06	+ +++++ +++
chr19:7476000-7493000	3751	CTTTCTTTTTCtttttttttttttaaagatttatttacataagtacactgtagctgactctgaagagtacctgtc	3776	4	y	7.8e-05	+ +++++++
chr19:7476000-7493000	5101	caagatctgactccctcttctggtgtgtctgaagacagctacagtgtacttacataaaataataaataaatcttt	5165	4	n	7.8e-05	+++++++ +
chr19:7476000-7493000	6151	TGGCAAGACTGTATTTATTATCTTCTAGAATATAGCAACTGACTGCGTGTCCCCACCCCCACGATGCACCACCGG	6202	2	n	7.7e-06	+++ +++++ +
chr19:7476000-7493000	6601	GTCACCCCCACCCCCCGACCCACCCTAGGGCTCTCGGGCCTCCAGCACTCGATCCATTGGGTGCACATAGCCTTT	6607	2	n	6.1e-06	+++ ++++++
chr19:7476000-7493000	6676	CTCCGTTTTCACCCCACTGCGGTGCCCTCCCTTGCAGGGGGTCAGCGTCAACGCCCACTCTAGTTCACCACCCCG CCCCCAACCTGTTTTCTTCACACCCCGTTATTTCCTCACCTCGGTCCTTCGCTCCCCTCCCCCTTAGCCTGTTCC	6747	2	n	2.8e-06	+++++++++
chr19:7476000-7493000	6901	TCGCGCTCCCCAGGGACCAAGCCCCACGCGCGCCTCACCCGCACACGAGGAGCCGCAGCTCTTCGCCCCCAGGGC GGGGCAGGCTCCAGGGCTCCCGCCGCCGCCGCCGAGAGCTGACGGCTCGGCCCCGGAGGACGACGAGGAGACTGA	6968	2	y	5.4e-05	+++++++
chr19:7476000-7493000	7051	CGGGGACTGAGTGGCCGCTGACGACTCCGCCATGGCTGTACGAGCAAGGGCGGGAGAAGGGTGAAGAGAGACGTA GGGCGGGAGAGTGGGAGGGGACACAGAATAATCCAGCAGCTGGCTCTCCGAAGTTCCCGGCGACGCCTGTTCGGA	7094	2	y	1.5e-05	+ +++++++
chr19:7476000-7493000	7051	CGGGGACTGAGTGGCCGCTGACGACTCCGCCATGGCTGTACGAGCAAGGGCGGGAGAAGGGTGAAGAGAGACGTA GGGCGGGAGAGTGGGAGGGGACACAGAATAATCCAGCAGCTGGCTCTCCGAAGTTCCCGGCGACGCCTGTTCGGA	7122	2	y	3.4e-05	+ +++++++
chr19:7476000-7493000	7351	GCGCTCCCGCAGGAAAGGACGCAGTGACTGGGCCCGCGGGTGGGGCAGGCCTCTCGGGGGTGAGGGGTAGGGGGT GGGGGAATGGGGGAAAGCCTGACGTAAGGGGCGTGGCTAAACTCTAGAACCGGCCCGCCACTGCAGCCCCTGCTA	7418	2	y	6.8e-06	++++++ +++
chr19:7476000-7493000	7351	GCGCTCCCGCAGGAAAGGACGCAGTGACTGGGCCCGCGGGTGGGGCAGGCCTCTCGGGGGTGAGGGGTAGGGGGT GGGGGAATGGGGGAAAGCCTGACGTAAGGGGCGTGGCTAAACTCTAGAACCGGCCCGCCACTGCAGCCCCTGCTA	7450	2	y	9.5e-05	+ ++++++ +
chr19:7476000-7493000	7501	CAGATTAACCGTGCCCAGTCTCCCCACCTTCCACTTGTTTATGTGAATGTTTTCTAGCTGGCAGATTATGTTTCT	7523	2	n	6.2e-05	+++ ++ ++
chr19:7476000-7493000	8401	ATGACTCTGGAAAATATCTTACTCTGTCACTCAACGGCAGGCATCAATTGATAGTGCAGCAAACTGTCCCCCGAT	8424	3	n	2e-06	++++++ +++
chr19:7476000-7493000	8476	GCTGTTGAGTGCCAGAGAACGATGGCAAAGGGAACTGTATGCCAGTAATCAGGAATCCAATTACTTATTTTGGTG	8481	3	y	8.4e-05	+++ ++ +++
chr19:7476000-7493000	8926	ctgggatctgatgtactcttctggtgtgtgtttgaagaccgttacagtgtactcatataaataaaataaataaat ctttaaaaaaaaaagaaaagaaaaagaaaatgactccataagatcaggtggtgagcaagcctaaaggatattttt	8994	4	n	7.8e-05	+++++++ +
chr19:7476000-7493000	10426	AAAGGTGATCTtgtgggatttgtcttttctgtgactgactgattttactcaacacataatgactgccggttgctg	10457	3	y	8.4e-05	+++ ++++ +
chr19:7476000-7493000	10501	ctgcaaatcacaaaatttcattcttttatccagaagtatattgtacatatataccacattttccttatctatcca	10501	3	n	7e-05	+++ +++++
chr19:7476000-7493000	10576	ttcattcactgactgacatggtggctgaatttgtattctagctattatgcataatgctgaaagaaacatggagag	10585	3	y	3e-05	+++ +++++
chr19:7476000-7493000	11926	TGTACGCACTTGGACGCACAATCTTTTCACGTGATTGACAGGCCTCCAGCACAATCACGTGACAGGTTACATACC	11957	3	y	1.1e-06	++++++++++
chr19:7476000-7493000	12526	aggtgctcttaaccaccaagccatctcttcagccTTGCACACCCACCCTTTCttgttgtttgagacaaggtctct	12567	2	n	3e-05	+++ +++ ++
chr19:7476000-7493000	12901	CAACATTTATTGTTCATGTCATTATTGTTAGAGTCAGGCCagctctgattggcctggaacttgctactttggcca	12942	1	y	4.8e-07	+++++++++++++
chr19:7476000-7493000	13051	ataatttttattatGTATTTTGTGTGTTTATGCATGACAGGGTGGGCATATGAAGGCCATGGCTCTCCTGTGTAG	13086	2	y	5.9e-05	++ +++ +++
chr19:7476000-7493000	15001	CCCCaatgaataaataaataaataaataaataaatgattaaaAGAAGTTAAAAAAAAAAGAAAGATAGAAATGTA	15009	4	n	8.7e-05	++++++ ++
chr19:7476000-7493000	15001	CCCCaatgaataaataaataaataaataaataaatgattaaaAGAAGTTAAAAAAAAAAGAAAGATAGAAATGTA	15021	4	n	8.7e-05	++++++ ++
chr19:7476000-7493000	15301	ACAATCTTCTGGAAGCTTTTGTCTGCACTGAGTGCCAGAAACAAGAGATCCTGCCTCAAAAACGAGGTGGAGGAG	15329	3	y	8.4e-05	+++ ++ +++
chr19:7476000-7493000	15451	ccaatgcctctggcctccatggcaactcaccatcatgtgcacatactcatggatttataataattaaaaataaaT CTTAAAGAGATagaagagaatcaacttctgaaaagttgtcctctgacttctatgtgcactgtggAATATTTATCC CGCCCCCCCAAATTAAAAAGAAAAACACACGGGATAGGTGGAGTTGGGAACAGGAGAGGTGGTGGGGAGGAGAAA	15519	4	n	7.8e-05	+++++++ +
chr19:7476000-7493000	15451	ccaatgcctctggcctccatggcaactcaccatcatgtgcacatactcatggatttataataattaaaaataaaT CTTAAAGAGATagaagagaatcaacttctgaaaagttgtcctctgacttctatgtgcactgtggAATATTTATCC CGCCCCCCCAAATTAAAAAGAAAAACACACGGGATAGGTGGAGTTGGGAACAGGAGAGGTGGTGGGGAGGAGAAA	15599	2	n	1.7e-07	+++++++++++
chr19:7476000-7493000	16276	ctgttccagccttgatgcgatgatcccgtggtgcctggtcctattgttgcttcttatgccctgtttgattgatgt	16340	4	y	3.5e-05	++++++ +++
chr19:7476000-7493000	16351	ccctgggaagcctgttcttagaggggatgtggagagggttggttctggggaagagaggaggggaaagatgggggc gtgggggagctgagggaggagaaattgcagttggatgtaatgtagaataaaaaataaaAATTAAAAAACAATACT	16418	2	y	9.5e-05	+++++++ +
chr1:65179000-65183000	76	GCGGCAGGGTCAAGGCTGTTTAACTCTTCCCGGCTTTGTCTCCTCCCAGGCCCCACCCCCTCAGCCCACCTCCCG	127	2	n	1.9e-06	+++ +++++++
chr1:65179000-65183000	76	GCGGCAGGGTCAAGGCTGTTTAACTCTTCCCGGCTTTGTCTCCTCCCAGGCCCCACCCCCTCAGCCCACCTCCCG	140	2	n	2e-05	+++ ++ +++
chr1:65179000-65183000	151	AAGCCCCGCCCCCTCCACGACGCCATTCGCCGCCTCCGACTTTGTGGGGTGGGCCGAGGCATAGATTGAGATTAA	155	2	n	9.2e-08	+++++++++++
chr1:65179000-65183000	151	AAGCCCCGCCCCCTCCACGACGCCATTCGCCGCCTCCGACTTTGTGGGGTGGGCCGAGGCATAGATTGAGATTAA	193	2	y	4.8e-05	+ ++++ +++
chr1:65179000-65183000	901	CTTAGTCTTGAAAAGGAGAACATTATGACTTGTAGGACAATAGGTCATCCTTGATTGGTCAAGATTCAACGCTTC	948	1	y	1.4e-05	+ ++++++++++
chr1:65179000-65183000	2626	ACCAGTTACGATTACCAGCAGGAGAACAGCAAAGATAACGGTTGCACTTGGTTTTTGAGTGACAGACACTCTTCT	2681	3	y	2e-06	+++ ++++++
chr13:45508000-45515000	601	GCCTGAAAGGACAGGGGCGGGGGTTGGGGGAAGCTAAGCCTGCCTGCCCGCCCCATCCCTTTTGCTCAACAAACA	611	2	y	1e-05	++++++++
chr13:45508000-45515000	601	GCCTGAAAGGACAGGGGCGGGGGTTGGGGGAAGCTAAGCCTGCCTGCCCGCCCCATCCCTTTTGCTCAACAAACA	647	2	n	3.8e-06	++++++++ ++
chr13:45508000-45515000	676	AGACCATAAATAAATCCCCTCAGCAAACAACTCGCTCCGGTGCCCAGGCCCGACTGCAGTGCCTGCAGCTGCCAG	680	4	n	2.9e-05	+++++++ ++
chr13:45508000-45515000	751	CTGAGGGTTGGTATGAATTAGGACTGCCTTCTGGGCTAGCCAATGAGAGAGTAGAACTTTCCTGAAGCAGGGGTA	787	1	n	3.4e-07	++++++++ ++++
chr13:45508000-45515000	826	TTGGCAGCTTGGAGGCAGAACTGGACCAGGCAAGACTTGGGGGGTGGGTTAAGGGGGAGTGATGGACTCTTACCC	863	2	y	8.5e-06	++++++ +++
chr13:45508000-45515000	976	ACAAAAATAAACACTAGAGAACCCCCCCCCCTGCACCCACCCCTACCCCCGGAGTGTTGAATAGAAACTAGGAGC	1011	2	n	2.2e-05	+++ ++++ +
chr13:45508000-45515000	2176	ccaccttttaaaagattattatgatgtcatttttgaagcaggaacttttgctgaccccccgccccccccccccga	2233	2	n	1.7e-07	+++++++++++
chr13:45508000-45515000	3751	GGAAATGTGTGTGGGTGGGTGGGTGTTCCCGGTACTGTCCTGTACCTTTCTTGCCATGTCCATGCATGATTGCTT	3763	2	y	1.7e-05	+++ +++ +++
chr13:45508000-45515000	4951	CCACAGAGTCCAGTGAAAGCAATGAGTGATAGAGAGTATTTAAAAAAGGGAATCTATTCACATGCAGTGTGCGTG	4973	3	y	1.7e-05	+++ +++ ++
chr13:45508000-45515000	6001	GGACCATTCAGTGCGTGGGGGTGGGGGTGGGGGAGTCACTGTGTGTGTGTTTGTATGTGTGTTGTGTGAGACTGG	6015	2	y	7.7e-06	+ +++++ +++
chr13:45508000-45515000	6376	CCCCCCCACCCCCCAACAGGTGGATCTTGAGCGAACTTTTACATTTCGAAACTCGAAGCAAACCTACTCAGGGAT	6380	2	n	8.5e-06	+++ ++++++
chr14:55558000-55561000	1	CTGTGGTCAAGAGGCACTGTATATATGTATGGAATtctcaaataaataacttggaaatttttgaggaagacacca	41	4	n	7.1e-05	++++++ ++
chr14:55558000-55561000	676	taaaagatttatttattattatatctaagtacactgtagctgtcttcagatgcaccagaagagggcgtcagatct	679	4	y	7.8e-05	+ +++++++
chr14:55558000-55561000	1276	TTCTGAAAGGGTGTACCAGTAGAAATAAGGCACTTCTAGGCACATTTGATTGGCAGACAAAATTTTCGAATGAAG	1322	3	y	6e-06	++++++ +++
chr14:55558000-55561000	1801	GAACCTGTCACATGCTCGCCCCGGGAGCTGAGGTGTCCTCGCGATGGCCCACCTCTGGGCCAAGGCCGACATCGC CCGCCTCTCTGGCCTAGGAAACCATCCCAGACAAGGTAGGGTTGGCCTTGGACTCACCCTAGTTACTCATAAACC	1848	2	n	6.2e-05	+++ ++ +
chr14:55558000-55561000	1801	GAACCTGTCACATGCTCGCCCCGGGAGCTGAGGTGTCCTCGCGATGGCCCACCTCTGGGCCAAGGCCGACATCGC CCGCCTCTCTGGCCTAGGAAACCATCCCAGACAAGGTAGGGTTGGCCTTGGACTCACCCTAGTTACTCATAAACC	1875	2	n	1.9e-05	++++++ + +
chr14:55558000-55561000	2401	TTGGGTTGAGCAAGTTCCCCAGCCCACCTATCAATCACAGGTCTCAGCTATCCAATCAGAGGGCCGAGGGGGAGG	2428	3	n	5.1e-06	++ +++++++
chr14:55558000-55561000	2401	TTGGGTTGAGCAAGTTCCCCAGCCCACCTATCAATCACAGGTCTCAGCTATCCAATCAGAGGGCCGAGGGGGAGG	2449	1	n	8.2e-07	++ +++++++++++
chr14:55558000-55561000	2701	TGTACACACCCCCGGCGCACCACGTGGGCGTGAAGCTAAACTGGAGGGGGTGTTAGGCTGACTTCTAACCTCATT GGCTGTTGATGCTGCCGGCCCGTGCAAGAAATTGCTCTGATTGGTCAGTAGAGGGAGGCGTGGGGGGGGTCTGAG	2767	1	y	2.9e-05	++ ++++++++
chr14:55558000-55561000	2701	TGTACACACCCCCGGCGCACCACGTGGGCGTGAAGCTAAACTGGAGGGGGTGTTAGGCTGACTTCTAACCTCATT GGCTGTTGATGCTGCCGGCCCGTGCAAGAAATTGCTCTGATTGGTCAGTAGAGGGAGGCGTGGGGGGGGTCTGAG	2809	1	y	1.2e-07	++++++++++++++
chr14:55558000-55561000	2851	TTCTAACGCCTCTGGTTGGTTGTGTGAGATAAGCTAGTGAAATGCGTTCTTCCGCAAGGGGTTTTGATTGGTCAG	2911	1	y	1.7e-06	+++ ++++++++++
chr15:78402000-78420000	601	CTTTCATCCCAAAGATAGGGAATCCAATCCCAAAGGCACCCTGGCTGTGGCCCAAAAGGCGGGGCCCTAGGCAGA	653	2	y	3.4e-05	+ ++++++
chr15:78402000-78420000	826	CAAGACTACTGAAGATTCTAGAAGCAAGGGGTCTGCAAATCAAAGTCCTCAGCATGGACCAGTACCCTCCTCTCT	858	3	n	7e-05	+++ +++++
chr15:78402000-78420000	901	CCTCCTCCTCACCCACCCCTAGGTGAAATAACAAGGTCACAGGTACCCAGGCTCAACAACTGAGAAATGAGTGCC	912	2	n	3.4e-05	+++ ++++
chr15:78402000-78420000	1276	GCCCCTCCCCCCTACTCCCACTCCCACCCCCCAGGGCAGGAAGTTGCCACTGGGTCTCTGAAGACCTGCTTTTCA	1298	2	n	8.5e-06	+++ ++++++
chr15:78402000-78420000	1351	TTTCTGCCACTCTCAGTACCTTCAGGAACACCCAGTCAAGGCCTCCCCACCCCCCACATCCCATGCTTTGTATCT	1396	2	n	8.5e-06	+++ ++++++
chr15:78402000-78420000	2026	CATGCATCTTTCTCCTCTGACCTTCCCAGAGCCAAGCAGGCGGGAGAAATCAAAGGCCTGGAGAGAGTGAGACTG	2059	2	y	8.8e-05	++ ++++++
chr15:78402000-78420000	2401	gagagGTGAGGTGGGCCAAAACTTGGGGTTGCCTCTGGTCAGGCGCCTCTAGAAAGCAGCATTTCATCTCCTGAG	2405	2	y	5.7e-05	++ + ++ +++
chr15:78402000-78420000	3901	GTGCGGTGGGCGGAGCCCAGGGGGCGGGGCTGTTGCTCCCACTACATTTTCCCAGCGTGCAATCGTAACTACACT	3918	2	y	2.6e-07	++++++++++
chr15:78402000-78420000	5176	CGGAATAAAAATAAAACTAGCATTTATGAAGCCCGCCTTGCCGAGTGCCTTCACGACCCTGCCGGATTGAGCTGA	5207	2	n	5.4e-05	++++++ ++
chr15:78402000-78420000	5701	GTTAGGGAGATGCTCTTCAGTGCCCGAACCCCCACCCCCCATGGGTGGGATATATAGGCTCACACTAACTTAGGA	5731	2	n	8.5e-06	+++ ++++++
chr15:78402000-78420000	5926	GCTGCCTGGGGTCTTTTGTCATAACTGTCAATCAAGCAGGGAGGGTAGTGACCTCAGACCTTTGAAGTCCCACCC CCTGGAAGTCTAAGGCCAGCTGTAGACTCAAGGGCCATTAGGAGAGTAAAGGAAGGAATAGCAGGTTTGCATTCA	5950	3	n	1.1e-06	++++++++++
chr15:78402000-78420000	5926	GCTGCCTGGGGTCTTTTGTCATAACTGTCAATCAAGCAGGGAGGGTAGTGACCTCAGACCTTTGAAGTCCCACCC CCTGGAAGTCTAAGGCCAGCTGTAGACTCAAGGGCCATTAGGAGAGTAAAGGAAGGAATAGCAGGTTTGCATTCA	5994	2	n	4.7e-06	+++ ++++++
chr15:78402000-78420000	6151	CACTAAGAGGTGGGTTTTGGAGTCTGGCATGGTGGTATATGCTTGTAATCCACCCAcccccactcccccactccc	6154	2	y	4.8e-05	+ + ++ +++
chr15:78402000-78420000	6151	CACTAAGAGGTGGGTTTTGGAGTCTGGCATGGTGGTATATGCTTGTAATCCACCCAcccccactcccccactccc	6203	2	n	7.7e-06	+++ +++++ +
chr15:78402000-78420000	6526	ggggccccatctgagatctgagattgttctctgccccaccccaccaccttcacacaAGCGCGCGTGCGcacgcac	6560	2	n	2.6e-05	+++ ++++ ++
chr15:78402000-78420000	6826	GTGCACACACCCGCCCTCCTGTGTCCCAACTCTCACATCCAGCTGCATCACAAACACTAGTAAagagtttcactc	6835	2	n	7.7e-06	+++++++ ++
chr15:78402000-78420000	7276	GTTGTTATTGTTGTTCTAGTTTTTGTTTGTTTGATTGATTGGTTTTGtttattttgttttgagctggtcttgctg	7306	4	y	9.8e-05	++++++ ++
chr15:78402000-78420000	7576	ATAAATGAGGATTAAATGTTTCTGGGCAAAGGGTGAATTCTGGTTATGTTCCCATTGGACTCCTAGACCGGCTCA	7623	1	y	4e-05	+++++ +++++ +
chr15:78402000-78420000	7651	ATGAATGTGTGGATCTGATTGGCTGTGAAGCTGGGCTACATCTTAGAGAAGGGCTGAAACTTTGGTCTTATTTGC	7662	1	y	6.8e-07	+ ++++++++++++
chr15:78402000-78420000	8476	TGAATCAGAACCTGCCAATCAGCTCCGGCAAAAGCCACTCGGAGCCCGCGGAGTTCAGCGCGCAGCTCGATCCCT	8487	3	n	6e-06	+++ ++++++
chr15:78402000-78420000	9826	TTCAGACTCCCTGCATACTTACCAACAGTGAGCAACCAGTAGTTCTCCCTACCACTTCTGTCCAGACTGCCAGGG TGGGAGCTAGCCATGGCCCCCAAAGCTCTCCCATGCCCTCTCTGCTGGTCCAGAATTCTGTTCAGAGCCCTGTCT	9894	2	y	8.4e-05	+ +++ +++
chr15:78402000-78420000	10651	TCTGTCTGCCAGGCTCTCAGTCACACTGTCAGGACTCTTGATTGGATAGTTTCATTCTGGGAGAAGACCCTACCC	10685	1	y	1.9e-05	++ +++++++ ++
chr15:78402000-78420000	10801	TAGTCTTTGTGCCTTCTTCTCCTGGGGTGGGGGTGACAGACATTTCCTTCCCATAGAATTTGGGTGGTATTAAAG	10821	2	y	5.7e-05	++++ +++
chr15:78402000-78420000	12001	TCAAGAACAAAAACATTTGTGGTTGTGAGAATGTCTCAGTGTAATGAGGACTGGGGATTCCTACACAACCAATGG GGAGGGGTTGCTGGGAGGTGGGGGGAGGGGCTCCCAGCCTGTGGGAAACATTGACTTCAAGTGATGCTGGGGCCT	12066	1	n	1.8e-05	++++++++ ++ ++
chr15:78402000-78420000	12001	TCAAGAACAAAAACATTTGTGGTTGTGAGAATGTCTCAGTGTAATGAGGACTGGGGATTCCTACACAACCAATGG GGAGGGGTTGCTGGGAGGTGGGGGGAGGGGCTCCCAGCCTGTGGGAAACATTGACTTCAAGTGATGCTGGGGCCT	12087	2	y	2.6e-05	+++ ++ +++
chr15:78402000-78420000	12226	CTTTTCGTTTATTTGCGTGTATGTGCACGCATGTGATTTAtgtgtatggattggcatgcgtgttgagatcagagg	12258	4	y	3e-06	++++++++++
chr15:78402000-78420000	12301	acaacctctgctcttgttcctcaaacacaatccaccttgttttctgagacaggatctctcattggtcgagaactc	12355	1	y	5.4e-06	++++ ++++++++
chr15:78402000-78420000	12451	cctcacccggtgtgtttcacatggatttacatgggttctgaggactgaacacagttcatgcaaaccctgtactga ttgggctgttgccacaacccTGCCTCCTGTGATATCAGGTGAAGTTAGCTGTGACTTGTCTGGGCACCATAGGGA	12519	1	y	8.5e-05	++ ++++++++ +
chr15:78402000-78420000	12976	cacacacacgcacacactcacgcacacactcacgcacatacatgcacGTAGCAACATAGAATAAATAAAATATCA	13035	4	n	8.7e-05	++++++ ++
chr15:78402000-78420000	14101	GGCACAGTAAATATCAACTATTAGTGTTTGGGTTGTTGTTTTTCACTACTATTTATTTATTCTTGCTTTGTATTT	14152	4	y	8.7e-05	++ ++++++
chr15:78402000-78420000	15001	TAATTGACTGTCCACAGCAGGGCCCACCTCAGCCTGCAGGCTTCCCTCCTGCCCCAACTCTGTGGGAGCCAGGGA	15023	2	n	7.4e-05	+++ ++ + +
chr15:78402000-78420000	15826	TAAGAAGAAGAGATTCCTGAACAATAAATCAGTCCTCTATAAAATTAACATATGCAAATAAATATTCTATAGACA	15848	4	n	4.9e-05	++++++++
chr15:78402000-78420000	16726	CAAACACCAAACCAAACAGTCATCCcaatcaatcaatcaatcagtcaatcaatcaatcaaccaaCAATGATGAAG	16752	4	n	9.8e-05	++ ++++++
chr15:78402000-78420000	16726	CAAACACCAAACCAAACAGTCATCCcaatcaatcaatcaatcagtcaatcaatcaatcaaccaaCAATGATGAAG	16767	3	n	2.7e-05	+ ++++++++
chr12:118298000-118303000	1426	CCATTGGAAGTCCCACTGTCAGTAGTAGTAGTAGGCTGGCCGACTTGTCCAGTCCCTCCTCCAGCAGTCACGTTA TTTATTACTGGCAAAGCTAAAGTCACTCCTCCAATGTTAATTGGTAGGGTTGTTACAACTTGAGCCTGAGTACCA	1497	4	y	7.1e-05	++ ++++++
[truncated: 1,195 more rows]

## Sheet: MAST_PBX1_H3K4me1_UniqSeq
Chromosome	Start	End	Width	Strand	Combined p-value of all motif matches within region	E-value
[truncated: 56 more rows]

## Sheet: MAST_PBX1_H3K4me3
Region	Start position of subregion relative to sequnces length	Sequence of subregion of contaning motif match	Start position of motif match relative to sequnces length	Motif Index	Reverse complement	pvalue	Match pattern
[truncated: 1,753 more rows]

[truncated: 1 more sheets: MAST_PBX1_H3K4me3_UniqSeq]
