# Supplementary material for: Role of MNX1-mediated histone modifications and PBX gene family in MNX1-induced leukemogenesis
Source: Sci Rep. 2026 Jan 19;16:2593. doi: 10.1038/s41598-026-36367-8 (PMC12820052; doi:10.1038/s41598-026-36367-8)
Supplement: Supplementary file 5 — Supplementary Material 5 [file 41598_2026_36367_MOESM5_ESM.xlsx]

## Sheet: MAST_PBX4_ATAC
Region	Start position of subregion relative to sequnces length	Sequence of subregion of containg motif match	Start position of motif match relative to sequnces length	Motif Index	Reverse complement	P-value	Match pattern
chr4:151044649-151045119	1	CGGGCAGTCCAGTCTCGAGGCCGTCCGCGTGCCCAGTGGCCGCCGGCCCCGCCCCCTGCGCGCCAGGGATCCGGT CCCGCCCCTTCGCCGCGCGATTGGTCGCTGTTACCGGCAACACGAGCTCCCATTGGTCAGAGGGCGGGGTGCAGG	46	2	n	7.9e-09	++++++++++++ +
chr4:151044649-151045119	1	CGGGCAGTCCAGTCTCGAGGCCGTCCGCGTGCCCAGTGGCCGCCGGCCCCGCCCCCTGCGCGCCAGGGATCCGGT CCCGCCCCTTCGCCGCGCGATTGGTCGCTGTTACCGGCAACACGAGCTCCCATTGGTCAGAGGGCGGGGTGCAGG	74	2	n	1.9e-07	+++++++++++++
chr4:151044649-151045119	1	CGGGCAGTCCAGTCTCGAGGCCGTCCGCGTGCCCAGTGGCCGCCGGCCCCGCCCCCTGCGCGCCAGGGATCCGGT CCCGCCCCTTCGCCGCGCGATTGGTCGCTGTTACCGGCAACACGAGCTCCCATTGGTCAGAGGGCGGGGTGCAGG	121	1	y	1.2e-05	++++ ++++++++
chr4:151044649-151045119	151	TCGTGCACGGCGGGGGTTACATAACCGCGGGCGGGTGGGCGGGTGCAAAGGCCCCCGAGTACCTTACATAACGCG	182	2	y	5.6e-05	+++++++++++
chr4:151044649-151045119	301	CAAGTCTACTGCCGGGCTTCCCGGAGGCGTGGCCTTGGGGCTGTCAGTCACGGGAGGGCGGGGTCCGCGCAGCCA	320	2	y	9.3e-05	+++++++ +++
chr4:151044649-151045119	301	CAAGTCTACTGCCGGGCTTCCCGGAGGCGTGGCCTTGGGGCTGTCAGTCACGGGAGGGCGGGGTCCGCGCAGCCA	339	3	n	8.1e-08	++++++++++++++
chr11:64978825-64979217	1	CGCTTCCGCCAAGTGACAGTAACCGGAAAACGTCAACAGGGAAAGCCGGAACCGGTGAGGGGGGCGGGGCCTCCG	57	2	y	1.3e-08	+ ++++++++++++
chr11:64978825-64979217	76	GCGACGCTCTAGCTTTCGCTTACTCTACGTCCACCTTGATTGACAGACTCCGAGCTCCAAGGCTCGTTACGATTG GATGCGGAGCTTTGGATGGGCGGGCAGCTAGCGCGGCGGCGCGCTGATTGGTCAGTTCCGCCATGCGGTGGAGGG GCGGTGCTTGTGGCGGCGTGAGGGGTCTGGCTGCCTTGTCAGCCTGGTGTGGTCGGGTGCATGTGGGCGCTCCGC	110	3	y	2e-07	++++++++++++ +
chr11:64978825-64979217	76	GCGACGCTCTAGCTTTCGCTTACTCTACGTCCACCTTGATTGACAGACTCCGAGCTCCAAGGCTCGTTACGATTG GATGCGGAGCTTTGGATGGGCGGGCAGCTAGCGCGGCGGCGCGCTGATTGGTCAGTTCCGCCATGCGGTGGAGGG GCGGTGCTTGTGGCGGCGTGAGGGGTCTGGCTGCCTTGTCAGCCTGGTGTGGTCGGGTGCATGTGGGCGCTCCGC	141	1	y	2.8e-05	++ +++++++ ++
chr11:64978825-64979217	76	GCGACGCTCTAGCTTTCGCTTACTCTACGTCCACCTTGATTGACAGACTCCGAGCTCCAAGGCTCGTTACGATTG GATGCGGAGCTTTGGATGGGCGGGCAGCTAGCGCGGCGGCGCGCTGATTGGTCAGTTCCGCCATGCGGTGGAGGG GCGGTGCTTGTGGCGGCGTGAGGGGTCTGGCTGCCTTGTCAGCCTGGTGTGGTCGGGTGCATGTGGGCGCTCCGC	163	2	y	4.6e-05	+++++++++++
chr11:64978825-64979217	76	GCGACGCTCTAGCTTTCGCTTACTCTACGTCCACCTTGATTGACAGACTCCGAGCTCCAAGGCTCGTTACGATTG GATGCGGAGCTTTGGATGGGCGGGCAGCTAGCGCGGCGGCGCGCTGATTGGTCAGTTCCGCCATGCGGTGGAGGG GCGGTGCTTGTGGCGGCGTGAGGGGTCTGGCTGCCTTGTCAGCCTGGTGTGGTCGGGTGCATGTGGGCGCTCCGC	191	1	y	5.6e-06	+ +++++++++++
chr11:64978825-64979217	76	GCGACGCTCTAGCTTTCGCTTACTCTACGTCCACCTTGATTGACAGACTCCGAGCTCCAAGGCTCGTTACGATTG GATGCGGAGCTTTGGATGGGCGGGCAGCTAGCGCGGCGGCGCGCTGATTGGTCAGTTCCGCCATGCGGTGGAGGG GCGGTGCTTGTGGCGGCGTGAGGGGTCTGGCTGCCTTGTCAGCCTGGTGTGGTCGGGTGCATGTGGGCGCTCCGC	219	2	y	7.5e-05	++++++++++ ++
chr5:73490727-73491203	1	CGGTTGGTCTCCCGCTCCAGGATCCGCCCGCCACAGGGCGGGGCTTCAGGGTCAAGGTGGACCAATTCCCCAGTC TCGCCCCTCCACGCGCTTTCGGACCCCTGAATGACTGACAGCCGTTGGGTCCAACCTGCGGCTCCGAACAGTGGC	31	2	y	6.5e-06	+ +++++++++
chr5:73490727-73491203	1	CGGTTGGTCTCCCGCTCCAGGATCCGCCCGCCACAGGGCGGGGCTTCAGGGTCAAGGTGGACCAATTCCCCAGTC TCGCCCCTCCACGCGCTTTCGGACCCCTGAATGACTGACAGCCGTTGGGTCCAACCTGCGGCTCCGAACAGTGGC	73	2	n	7.9e-05	+++ +++++++++
chr5:73490727-73491203	1	CGGTTGGTCTCCCGCTCCAGGATCCGCCCGCCACAGGGCGGGGCTTCAGGGTCAAGGTGGACCAATTCCCCAGTC TCGCCCCTCCACGCGCTTTCGGACCCCTGAATGACTGACAGCCGTTGGGTCCAACCTGCGGCTCCGAACAGTGGC	105	3	y	7.2e-07	++++++++++++
chr5:73490727-73491203	151	CTCCACCAGGGGCGGTCGGAGGCGAGACGCCGGGGCCAATCACGTTGCAGTCTAGGGGGCGGGGCCTCCTTGCCA	165	2	y	9.3e-05	+ +++++++ +++
chr5:73490727-73491203	151	CTCCACCAGGGGCGGTCGGAGGCGAGACGCCGGGGCCAATCACGTTGCAGTCTAGGGGGCGGGGCCTCCTTGCCA	202	2	y	9.9e-08	++++++++++++
chr5:73490727-73491203	226	GCTGCAGGCGGCGCAACCAGCACTTCTTCGGTCAAATGAGAGCCGAAGAGGGGCGGTCCCCCGGCTGGGGTCTAG CCAATGAGAAGGGCGGGATGGGCGGGCCGGAGAAGAAGCCGGCGGTCCTCTGTTGCGAGCTAAGGTTTGGGGAGT	298	1	n	2.1e-07	++++++++ +++++
chr5:73490727-73491203	226	GCTGCAGGCGGCGCAACCAGCACTTCTTCGGTCAAATGAGAGCCGAAGAGGGGCGGTCCCCCGGCTGGGGTCTAG CCAATGAGAAGGGCGGGATGGGCGGGCCGGAGAAGAAGCCGGCGGTCCTCTGTTGCGAGCTAAGGTTTGGGGAGT	315	2	y	1.8e-06	++++++++++++ +
chr4:44704479-44704751	1	TGCGTGTGGACAGCGCCGCCCGGGGCTCAGCCTCCCTCCGGGCGGGGGCGGGGCGAGAGCTCACCTGCCAATCAT GCCCCATCAAGCCAATCAGAACAGGGGCATCCGGCCCTAGCCCGATATACTGCCCTATTGGCTAAGCAACCCACG	41	2	y	4.9e-08	++ +++++++++++
chr4:44704479-44704751	1	TGCGTGTGGACAGCGCCGCCCGGGGCTCAGCCTCCCTCCGGGCGGGGGCGGGGCGAGAGCTCACCTGCCAATCAT GCCCCATCAAGCCAATCAGAACAGGGGCATCCGGCCCTAGCCCGATATACTGCCCTATTGGCTAAGCAACCCACG	63	3	n	4e-06	+++++ ++++++ +
chr4:44704479-44704751	1	TGCGTGTGGACAGCGCCGCCCGGGGCTCAGCCTCCCTCCGGGCGGGGGCGGGGCGAGAGCTCACCTGCCAATCAT GCCCCATCAAGCCAATCAGAACAGGGGCATCCGGCCCTAGCCCGATATACTGCCCTATTGGCTAAGCAACCCACG	84	1	n	6.6e-07	++++++++++++
chr4:44704479-44704751	151	GGCTCCGCCTGATTAGCCGGTACCTGGGCAATGGGAGAGAATGGGGGGCGGGGCCCAAGCTGCGGCGCCACGTTC	191	2	y	3.4e-07	++++++++++++
chr1:168432356-168432673	1	AGGGAGGAGGGCTCTTGAGCCCCGCCCCCTTCTATGATTGGCTAGTCCTGAAAGTGGGctcctcctccccctact	19	2	n	3.2e-09	++++++++++++ +
chr1:168432356-168432673	1	AGGGAGGAGGGCTCTTGAGCCCCGCCCCCTTCTATGATTGGCTAGTCCTGAAAGTGGGctcctcctccccctact	58	2	n	7.5e-05	++ ++ ++++++++
chr1:168432356-168432673	76	ttccacccagcgtctcctcctcggcctccttcagctcctcctAGCCCGGGAGTCTTGTCAATCAGAGTTCAGAGG	128	3	n	1.2e-05	+ +++++++++
chr1:168432356-168432673	151	TGGGCCGGGAAGGAGGCGGAGCTATGACCCAGTCTCCAGTTCTTAAAGGCGCAGAGAGACCTTAGCTTCAGCTCT	159	2	y	9e-07	+ +++++++++ ++
chr19:14598087-14598659	151	CTCTCCAGGAGCCCCGCCCTCCCGCGGCGCGAGGGCGCCGCATCAACCAATCGGAGATGGCTGAACATTAATCGC	161	2	n	1.3e-07	+++++++++ +++
chr19:14598087-14598659	151	CTCTCCAGGAGCCCCGCCCTCCCGCGGCGCGAGGGCGCCGCATCAACCAATCGGAGATGGCTGAACATTAATCGC	194	1	n	1.1e-06	+++++++++++++
chr19:14598087-14598659	226	GGTTCTGTGTTACTGCCCATCATTTCACCGCTGACAAATGGCAAGCCAGGAGGGCGGGGCCGGGCAGGCTAGGCC	272	2	y	2.8e-07	++ +++++++++
chr19:14598087-14598659	301	CACGTGGGGACAGGGCGTGGCGTGGAGCTCCGACCAATAACTGCAAAGAATTGGTGCTGGCGGAggcggggcgca	308	2	y	8.4e-05	+++ +++++ +++
chr19:14598087-14598659	301	CACGTGGGGACAGGGCGTGGCGTGGAGCTCCGACCAATAACTGCAAAGAATTGGTGCTGGCGGAggcggggcgca	331	1	n	6.6e-05	++++++++ + +
chr19:14598087-14598659	301	CACGTGGGGACAGGGCGTGGCGTGGAGCTCCGACCAATAACTGCAAAGAATTGGTGCTGGCGGAggcggggcgca	359	2	y	3.4e-07	++ +++++++++++
chr19:14598087-14598659	376	gcggcccgcccggggcggAGCCTCGCCCTGGCCGCTGTTCCCTAGTGCGAGCGTTCGAACCGCGGAAACATTTGT	383	2	y	2.1e-05	+ +++++++ ++
chr19:14598087-14598659	451	TCAGCTGTCAATCAAAGTAACGTGGGGTGGCGAGCCGCGGCGGCTGCTGTCGCTGCTGCACTGGCTGCATCTTTA	453	3	n	1.2e-07	+++++++++++++
chr2:174464035-174464369	1	GCTTCAGAGTAGCCTCAAACCGGCCCGGCAGCAGGAAGGTCAGGCCTGAGTAGCGGAAGGGGTGGGGTACGCGGA CCTGCCAGTCAGCGCCTCATCCCGCCCTTGCCAACCAGGAGCCAATAGGAGCGCCGGTCGCGCCTTGCCCATTGG CCGAGCGGCTACCGGAAGCTGTGGCCGTAGAGACACCTGGGAAAGCGAGGCCGCTGCATGCCGGTCACCTTCCAG	55	2	y	8.8e-06	++++++++ ++++
chr2:174464035-174464369	1	GCTTCAGAGTAGCCTCAAACCGGCCCGGCAGCAGGAAGGTCAGGCCTGAGTAGCGGAAGGGGTGGGGTACGCGGA CCTGCCAGTCAGCGCCTCATCCCGCCCTTGCCAACCAGGAGCCAATAGGAGCGCCGGTCGCGCCTTGCCCATTGG CCGAGCGGCTACCGGAAGCTGTGGCCGTAGAGACACCTGGGAAAGCGAGGCCGCTGCATGCCGGTCACCTTCCAG	75	3	n	8.4e-06	+++++ ++++++
chr2:174464035-174464369	1	GCTTCAGAGTAGCCTCAAACCGGCCCGGCAGCAGGAAGGTCAGGCCTGAGTAGCGGAAGGGGTGGGGTACGCGGA CCTGCCAGTCAGCGCCTCATCCCGCCCTTGCCAACCAGGAGCCAATAGGAGCGCCGGTCGCGCCTTGCCCATTGG CCGAGCGGCTACCGGAAGCTGTGGCCGTAGAGACACCTGGGAAAGCGAGGCCGCTGCATGCCGGTCACCTTCCAG	94	2	n	1.1e-05	++++++++ + ++
chr2:174464035-174464369	1	GCTTCAGAGTAGCCTCAAACCGGCCCGGCAGCAGGAAGGTCAGGCCTGAGTAGCGGAAGGGGTGGGGTACGCGGA CCTGCCAGTCAGCGCCTCATCCCGCCCTTGCCAACCAGGAGCCAATAGGAGCGCCGGTCGCGCCTTGCCCATTGG CCGAGCGGCTACCGGAAGCTGTGGCCGTAGAGACACCTGGGAAAGCGAGGCCGCTGCATGCCGGTCACCTTCCAG	114	1	n	1.3e-05	+++++++ ++++
chr2:174464035-174464369	1	GCTTCAGAGTAGCCTCAAACCGGCCCGGCAGCAGGAAGGTCAGGCCTGAGTAGCGGAAGGGGTGGGGTACGCGGA CCTGCCAGTCAGCGCCTCATCCCGCCCTTGCCAACCAGGAGCCAATAGGAGCGCCGGTCGCGCCTTGCCCATTGG CCGAGCGGCTACCGGAAGCTGTGGCCGTAGAGACACCTGGGAAAGCGAGGCCGCTGCATGCCGGTCACCTTCCAG	140	1	y	2.8e-05	+ ++ ++++++++
chr2:174464035-174464369	226	GTGCTGCGGGCAGGGGGCGGGGCCTCCTCGAGCCCGCTCTGAGTGACAGCTAATGTTCCTGTCTGCATGTACCCA	235	2	y	7.9e-09	+ ++++++++++++
chr2:174464035-174464369	226	GTGCTGCGGGCAGGGGGCGGGGCCTCCTCGAGCCCGCTCTGAGTGACAGCTAATGTTCCTGTCTGCATGTACCCA	263	3	y	1.2e-06	+++ ++++++++
chr9:21760276-21760721	1	ATGACTGATCGCGCCGAGTCCGAACCCGCGCAAATTCGTCTCACCACGGGCCCCGCCCCCTCCCCAGAGCGCATA	50	2	n	1.1e-09	++++++++++++++
chr9:21760276-21760721	151	CGGCCATTTTGTGGAGATCCTGTGCGAAATTTCTTCTGTCACTCAGGTGTGAGGATCAATCATCGTAggcggggg	184	3	n	4.5e-06	++++++ +++ +
chr9:21760276-21760721	151	CGGCCATTTTGTGGAGATCCTGTGCGAAATTTCTTCTGTCACTCAGGTGTGAGGATCAATCATCGTAggcggggg	212	2	y	6.3e-05	++++++++++
chr9:21760276-21760721	226	aggggggggggcggcggcgcggggggggggcgTGTCACACGTGGCCAGTTTGCGATTGGCCTGGTACGCGTGCGT	248	2	y	8.4e-05	++++++++++ + +
chr9:21760276-21760721	226	aggggggggggcggcggcgcggggggggggcgTGTCACACGTGGCCAGTTTGCGATTGGCCTGGTACGCGTGCGT	274	1	y	2.3e-05	++ +++++++++
chr5:110135627-110136033	76	TTCTCTCATCTGCGCAGGCTCCGATCGCTCCGCCCCGCCCCCTCCGGATAGCCTTTTCTGGCACCGCTCTAGCCG	107	2	n	1.1e-09	++++++++++++++
chr5:110135627-110136033	151	TCGCTCTCGGTGGGCACGGCCGCCAGCCAATCACAGGGCGTACCGCTCTGCTCCCCTCCCCCTCGCCTCCCGTGG	174	1	n	6.6e-07	++++++++++ +++
chr5:110135627-110136033	151	TCGCTCTCGGTGGGCACGGCCGCCAGCCAATCACAGGGCGTACCGCTCTGCTCCCCTCCCCCTCGCCTCCCGTGG	202	2	n	5.9e-05	++++ +++++++
chr11:50292155-50292717	151	GCTGCCGCCGCCATCTTAAAATTGTTTTCGGGGCTTTCGGAAGAGGGCGGGGCCTGGGCCGGCGAACTCTGCGTC	190	2	y	3.5e-08	+ ++ +++++++++
chr11:50292155-50292717	226	ACTGCTGATGGACCGAAGCTCTAGCCAATCAAAGGAAACCCGCTGCCCGAGGGCGTGGGGGACAAGCACGTCAGG	247	1	n	2.1e-07	++++++++++ +++
chr11:50292155-50292717	301	AATTTTCGGGTATTTAAACTGAACACTCTGGCGAGGAGGGAAGCCCGAGGCGGGCTCAGTGCGGGAGAGTGAACT GTGACTGACGGGAACCTATCCAAGAAGAGCCACGTTTTCTGAACACCGCCCCCTGAAAGCAGTCCCTTCCGGGTT	375	3	y	1.1e-05	+++++++++ ++
chr11:50292155-50292717	451	CGTGAGGAACGCGGGTTAAGTCTGAGTGAGGTGGAAGCCTTAAGACCCAGATGTCCAAAGCTGTCTATCTTTTTA	509	3	n	4.2e-05	+++++++ +++
chr1:191396979-191397845	76	GCGTGCGCGCTCCCGCGGCCCGGGGGAGGTCCTCGCGGGGGGTGGAGGAAGGAGTTTGACTGACAACTTCCGCGG	110	2	y	7.1e-05	+ ++++++ ++ +
chr1:191396979-191397845	76	GCGTGCGCGCTCCCGCGGCCCGGGGGAGGTCCTCGCGGGGGGTGGAGGAAGGAGTTTGACTGACAACTTCCGCGG	130	3	y	6.2e-06	++++++++++ ++
chr1:191396979-191397845	151	GGTCCCACTAGCCTCCGGAGTCTCCGGAGGGGGCCGGGGCGGGAAAGCATGCCAGTGCCCTCGGCCAATCGCAGG	182	2	y	2.6e-05	++ +++++++++
chr1:191396979-191397845	151	GGTCCCACTAGCCTCCGGAGTCTCCGGAGGGGGCCGGGGCGGGAAAGCATGCCAGTGCCCTCGGCCAATCGCAGG	212	1	n	1e-05	++++++++++ +++
chr1:191396979-191397845	226	GCTAAGCGGCAGACGGGGGTGGGGGCGTGGCCTCCCGGCTGTCTATCAAGAGTCCATAGCTGGGTGGGAGGGAGG GGCTACGTGACAGACGCGGGCCACAACCAATCGCAAGTGAAGGCAGTGAGCGGGGTGCCTTGTGCGTCACAACTG	243	2	y	1.6e-05	++ +++++++ +++
chr1:191396979-191397845	226	GCTAAGCGGCAGACGGGGGTGGGGGCGTGGCCTCCCGGCTGTCTATCAAGAGTCCATAGCTGGGTGGGAGGGAGG GGCTACGTGACAGACGCGGGCCACAACCAATCGCAAGTGAAGGCAGTGAGCGGGGTGCCTTGTGCGTCACAACTG	262	3	n	1.3e-06	+++++++ ++++++
chr1:191396979-191397845	226	GCTAAGCGGCAGACGGGGGTGGGGGCGTGGCCTCCCGGCTGTCTATCAAGAGTCCATAGCTGGGTGGGAGGGAGG GGCTACGTGACAGACGCGGGCCACAACCAATCGCAAGTGAAGGCAGTGAGCGGGGTGCCTTGTGCGTCACAACTG	290	2	y	8.8e-05	+++ +++ +++++
chr1:191396979-191397845	226	GCTAAGCGGCAGACGGGGGTGGGGGCGTGGCCTCCCGGCTGTCTATCAAGAGTCCATAGCTGGGTGGGAGGGAGG GGCTACGTGACAGACGCGGGCCACAACCAATCGCAAGTGAAGGCAGTGAGCGGGGTGCCTTGTGCGTCACAACTG	324	1	n	1.9e-06	++++++++++ +++
chr1:191396979-191397845	526	CCTCCCTCTCTTTGCGCCCTGCTTACCAATGAGAACATGAAGCGAGGGCCGGGGTGCCCAAGAACACCAAGCATT	548	1	n	1.9e-05	+ ++++++ ++++
chr1:191396979-191397845	601	GCGTCAGTCGAACGGGGGCGGGGCCAAGGTCGTGTCAGAGCAACGTGATTGACAGGCGAAGGAGCCCCGGGAGAG	611	2	y	6.6e-07	+++++++++++
chr1:191396979-191397845	601	GCGTCAGTCGAACGGGGGCGGGGCCAAGGTCGTGTCAGAGCAACGTGATTGACAGGCGAAGGAGCCCCGGGAGAG	644	3	y	2.1e-08	++++++++++++++
chr1:191396979-191397845	676	AAATGAGCTTGTCCAATCGGAGCGCGGGGCTACGTTCTTGGGCGGGCCTTCTCCTCTCCGGTCCTAAACCGCGTA	685	1	n	2.1e-05	++ ++++++++++
chr8:84237038-84237485	1	AGACTCTTCACAACAATGAAGCCGTCTTAGCAGCCGCTGCCTCCTCAGACGAGGCCCCGCCCCCACCGCCCTATT	54	2	n	1.3e-08	+++++++++++ ++
chr8:84237038-84237485	76	TCTCCCTTTCTATTGGCTGTCCTCAAAGACCCGCCTCCAAGATGCCGCTGTTCATTCGACAATCTCCACGTCCGT	81	1	y	4.8e-06	+++ + ++++++++
chr8:84237038-84237485	76	TCTCCCTTTCTATTGGCTGTCCTCAAAGACCCGCCTCCAAGATGCCGCTGTTCATTCGACAATCTCCACGTCCGT	103	2	n	2.6e-05	+ +++++++++
chr8:84237038-84237485	151	CTTTTCTGTGCCATCCAATAAGAGGTCGCAAGAAGAGTCGCTGTCCATCACGGGGCGGTATGAGCCAATCAAAAT	162	1	n	7.3e-06	++ +++++ +++++
chr8:84237038-84237485	151	CTTTTCTGTGCCATCCAATAAGAGGTCGCAAGAAGAGTCGCTGTCCATCACGGGGCGGTATGAGCCAATCAAAAT	189	3	n	5.6e-06	++++++ ++++++
chr8:84237038-84237485	151	CTTTTCTGTGCCATCCAATAAGAGGTCGCAAGAAGAGTCGCTGTCCATCACGGGGCGGTATGAGCCAATCAAAAT	212	1	n	3.3e-06	+++++++++ ++
chr8:84237038-84237485	226	GAGGGAACCCCACGGCTTGGCCTTGTGAGGAGTTTCGGGGAGGTCTCACGTTCATTCACAACATTCCTTCTCCGC CCCTTTGGGCCGGCCCTCTAGCCTGGCGGCTGGGGCTGCGCCTACACACGGCTTTGTTTACGGAGGGTCGCTTCC	294	2	n	7.9e-06	+ +++++++++
chr5:34573355-34573921	1	AGTCCTGACTCCACCCTGATTGACAGCCCAGTCTCCCAAACTGCCTACTGATCTTCTCGCCTGAAGCGCACCTAG	15	3	y	4.7e-08	+ ++++++++++++
chr5:34573355-34573921	226	TCTACCCTTCTCTCCGCCTCCCAGGGCCCCGCCCTTCTCCGGGCCTGCCCCTTGCTTAAGATTGACCAATAACAG AGAGTAGTGCTGGACGGCGGTAGGGCGTTCAGACCAATGGGGCTGTGCATTGTTGGGCCGCAGCGCCGCAGGCCG	236	2	n	2.3e-05	+ +++++++++
chr5:34573355-34573921	226	TCTACCCTTCTCTCCGCCTCCCAGGGCCCCGCCCTTCTCCGGGCCTGCCCCTTGCTTAAGATTGACCAATAACAG AGAGTAGTGCTGGACGGCGGTAGGGCGTTCAGACCAATGGGGCTGTGCATTGTTGGGCCGCAGCGCCGCAGGCCG	251	2	n	2.3e-07	+++++++++ ++ +
chr5:34573355-34573921	226	TCTACCCTTCTCTCCGCCTCCCAGGGCCCCGCCCTTCTCCGGGCCTGCCCCTTGCTTAAGATTGACCAATAACAG AGAGTAGTGCTGGACGGCGGTAGGGCGTTCAGACCAATGGGGCTGTGCATTGTTGGGCCGCAGCGCCGCAGGCCG	288	1	n	1.2e-05	++++++++ + ++
chr5:34573355-34573921	376	CACCCAGCTTggcggcgggggcgagtagaggggtgagggttgagggcgggagaggacgagggctgctgcaggcgg	414	2	y	2.3e-05	+ + ++++++++
chr5:34573355-34573921	451	cggggggtgcgcggcagccagggggcggagCCCAGCGCGAGCCGCAGGCGAGGCGGCGGCCGCACTCGGACCCGG	468	2	y	7.6e-07	+++++++++ ++
chr17:46751758-46752512	151	CCCACAGGCCCCGCCCCCTCCCGCCCCTCGGGCTTGGCTACGCCCCGCGGCCCCGCCCCCTCACCTTCGCATTTG	158	2	n	1.1e-09	++++++++++++++
chr17:46751758-46752512	151	CCCACAGGCCCCGCCCCCTCCCGCCCCTCGGGCTTGGCTACGCCCCGCGGCCCCGCCCCCTCACCTTCGCATTTG	200	2	n	2.3e-07	+++++++++++++
chr17:46751758-46752512	451	GACTGCGCACGTGCCTCTGGGTAACCACGGCAACGGCGAGCTCCGGCCCGCCCCACGCCCGGTAGCCTCTAGCGG	495	2	n	9.6e-06	+ ++++++++ + +
chr17:46751758-46752512	526	CTTGCGAAACCGACCAAGGCCCGCGGGCGACGCAACCAATGGGTTCGCTCGGCGTCTGCTTTATAGCCAATGAGA GGAACTATCTTTTTTTTTTCCCATCTCAGCCAATCAGAGAGCGGATGGTGGCTTTGGCGCCCTATAGCGATATCA	558	1	n	8.6e-05	++++++++ ++
chr17:46751758-46752512	526	CTTGCGAAACCGACCAAGGCCCGCGGGCGACGCAACCAATGGGTTCGCTCGGCGTCTGCTTTATAGCCAATGAGA GGAACTATCTTTTTTTTTTCCCATCTCAGCCAATCAGAGAGCGGATGGTGGCTTTGGCGCCCTATAGCGATATCA	589	1	n	5.3e-07	++++++++ +++++
chr17:46751758-46752512	526	CTTGCGAAACCGACCAAGGCCCGCGGGCGACGCAACCAATGGGTTCGCTCGGCGTCTGCTTTATAGCCAATGAGA GGAACTATCTTTTTTTTTTCCCATCTCAGCCAATCAGAGAGCGGATGGTGGCTTTGGCGCCCTATAGCGATATCA	627	1	n	1.2e-07	+++++++++++++
chr11:23255475-23256103	1	AAACCCGCGCTGCCTTCTGCTCACGGGCGAACCCCACCCTCTCCGTCACCAAAGGCGCCCAGCCAATGGGCGAGC	31	2	n	1.1e-05	++++ +++ ++++
chr11:23255475-23256103	1	AAACCCGCGCTGCCTTCTGCTCACGGGCGAACCCCACCCTCTCCGTCACCAAAGGCGCCCAGCCAATGGGCGAGC	60	1	n	1.6e-05	++++++++ ++ +
chr11:23255475-23256103	76	CGGAAAGGCCGGGCTTACAAGCGAGGGACCGAGAGGGGGAGCCACTCGAGGGGAAAGGGATGTAGAAGGCGGGCT	137	2	y	2.8e-05	+ ++ +++++++
chr11:23255475-23256103	151	GCACTTGACTGACAGCTCACTCAAGCCAATCCTCTGTGAGGCTTCTCCGCTCTCCTCTTTGCTGGGCTCTGTTCG	154	3	y	8.1e-08	++++++++++++++
chr11:23255475-23256103	226	ACGtcccaccttctcttcctccacccccccctcactcctttgcgtcccgccccgcctcccctcccccACTCTGCG	228	2	n	2.1e-05	+++++ +++ +++
chr11:23255475-23256103	226	ACGtcccaccttctcttcctccacccccccctcactcctttgcgtcccgccccgcctcccctcccccACTCTGCG	243	2	n	4.9e-05	+ ++ ++++++++
chr11:23255475-23256103	226	ACGtcccaccttctcttcctccacccccccctcactcctttgcgtcccgccccgcctcccctcccccACTCTGCG	274	2	n	3.4e-07	+++++++++++++
chr11:23255475-23256103	301	GGCAAATCACTGCTGGAAAGAGGCGGGGGCCTAAGCGGCAGGCTCGTGTGGAGCCTTGAGGTGGGATTGACGGGC	316	2	y	7.9e-06	+ +++++++++++
chr11:23255475-23256103	301	GGCAAATCACTGCTGGAAAGAGGCGGGGGCCTAAGCGGCAGGCTCGTGTGGAGCCTTGAGGTGGGATTGACGGGC	362	3	y	4.5e-05	+ +++++++ +++
chr11:23255475-23256103	376	GCTCCGACCAATAAGAGGTAGGCTGATGGCGCGGCTGTGGCCGGGGCCGACCAATGGGCGCGCGGCCTGGGGGCG GAGGCCCAGGTTCCAAACGCTCCGCGGCGCCATGGGCTGAAAACTCAACCGAGATGGAATCTCCCAGTCTGAACC	380	1	n	3.7e-06	++++++++ +++++
chr11:23255475-23256103	376	GCTCCGACCAATAAGAGGTAGGCTGATGGCGCGGCTGTGGCCGGGGCCGACCAATGGGCGCGCGGCCTGGGGGCG GAGGCCCAGGTTCCAAACGCTCCGCGGCGCCATGGGCTGAAAACTCAACCGAGATGGAATCTCCCAGTCTGAACC	423	1	n	3.6e-05	++++++++ ++ +
chr11:23255475-23256103	376	GCTCCGACCAATAAGAGGTAGGCTGATGGCGCGGCTGTGGCCGGGGCCGACCAATGGGCGCGCGGCCTGGGGGCG GAGGCCCAGGTTCCAAACGCTCCGCGGCGCCATGGGCTGAAAACTCAACCGAGATGGAATCTCCCAGTCTGAACC	441	2	y	2.8e-05	++++++++ +
chr5:31202000-31202611	76	GAGGCCTCCCGGCCCCGCCCCTCCCAGTTCGGCCCTGCCGTCGGTCCTTGCTCTTAGGATCCACGAACCGCCCCC	87	2	n	1.4e-08	++++++++++++++
chr5:31202000-31202611	376	TTGTGATGCGCTGCTAGCCAACCAATCAGAAGCTGGACGCGTAACCCAACCAGCCAACCAGGAAGGTGGTACCCT	394	1	n	1.7e-08	++++++++++++++
chr12:85824532-85825122	1	AGCTCCGGTCCCAAGTCCACCTGGGCCACTTGTTCCCGCCCCCTCCCTCAGCCCAGCTCCAGGATTGGGTTGTTT	33	2	n	4.8e-07	+++++++++++++
chr12:85824532-85825122	76	TTGTCAGTCCTCGTTCTGATTGGCTACGCTGGCTCAGTTCGAGCAGGCGATAGGGAGTGAACTCCTTTGCTGCCA ATCAGCAGTTGCCGCCGCCTGAGCCTCTTCCTGCTACGCCGCTCACGCGGTAAACCCTTCTGTCGAGCGTGGCGG	88	1	y	3.7e-08	+++++++++++++
chr12:85824532-85825122	76	TTGTCAGTCCTCGTTCTGATTGGCTACGCTGGCTCAGTTCGAGCAGGCGATAGGGAGTGAACTCCTTTGCTGCCA ATCAGCAGTTGCCGCCGCCTGAGCCTCTTCCTGCTACGCCGCTCACGCGGTAAACCCTTCTGTCGAGCGTGGCGG	143	3	n	1e-05	++++ ++++++
chr12:85824532-85825122	226	AACTCTGAGTTTGGAGTCAGTCTTTTAGGGGTGGGGAAAACGCAGAGAGAAAAAGGAGCCAAGAAACCTTCTGGT	249	2	y	9.9e-05	+++++ ++++
chr12:85824532-85825122	451	GCAGCCTTCGGCGGCTGCGTTGATTCGGGCTGGGGAAGGAGGAGGGAGGTGAAGCAGAGCGTGGTCCCCGCCTGC CGGCCCCGAGCCGTGAGAAGATGAGACAGGTAAACGCCTGCGCCGGCGCGCTCCGGGGAGGTGCG	515	2	n	7.1e-05	++++++++ ++
chr13:80885501-80886394	76	CCCAGGCGCCCGGCGATAGGCGGAGCAGCGTTTGTTAGCCTGTTGCTAAGGCGATGCCAGGCGTTGATTGGATTG	88	2	y	6.5e-06	+ +++++++++ ++
chr13:80885501-80886394	76	CCCAGGCGCCCGGCGATAGGCGGAGCAGCGTTTGTTAGCCTGTTGCTAAGGCGATGCCAGGCGTTGATTGGATTG	136	1	y	4.2e-05	+ +++++++ +
chr13:80885501-80886394	151	GGCTGGTGGGGGTGGGGAGGATCAAGCCGGCTCGCGCCGGTTGGGGCGAGGCTTGGAACCGGCGTGCGCCGGTAA	155	2	y	9.6e-06	++ +++++ ++++
chr13:80885501-80886394	151	GGCTGGTGGGGGTGGGGAGGATCAAGCCGGCTCGCGCCGGTTGGGGCGAGGCTTGGAACCGGCGTGCGCCGGTAA	189	2	y	5.2e-05	++ ++++++ +++
chr13:80885501-80886394	376	CTGACCCGAGGGGACGTGACAGAGGCTGGGCATTGCAGAGAACGCTGCGGCCAGCTCGGCCTCGCCCATTATTCC	434	2	n	5.9e-05	+++ ++++++++
chr13:80885501-80886394	526	GCCAGATTGAACCGGTCACCGGCTGGGGCGTGGAAAGCGGAAgcgcggcgcgcggtggccccgcccccggcTCAG	583	2	n	1.9e-07	+++++++++++ +
chr13:80885501-80886394	601	CAGGCTAGGCTGCGCGGGCGCGAGCGCCGCGCGACGTATGCCGTATGTATAgcggggcgcgcggagcgcgggcgc gagcgggcgggccggcTGAGAGCTGCTCAGCGCCGGTTTAGGCCGGTCCTCTCCTGCTCCAGTCTAGTTCTTGAT TGACAGCCAGGCACTTGTTTACCACGGCGCGGCGGCCGCCGCTCGCCTCAATGAGACTGCTGAGCTGGCACAAAA	675	2	y	2.4e-05	+++ +++++++ +
chr13:80885501-80886394	601	CAGGCTAGGCTGCGCGGGCGCGAGCGCCGCGCGACGTATGCCGTATGTATAgcggggcgcgcggagcgcgggcgc gagcgggcgggccggcTGAGAGCTGCTCAGCGCCGGTTTAGGCCGGTCCTCTCCTGCTCCAGTCTAGTTCTTGAT TGACAGCCAGGCACTTGTTTACCACGGCGCGGCGGCCGCCGCTCGCCTCAATGAGACTGCTGAGCTGGCACAAAA	745	3	y	6.9e-09	++++++++++++++
chr10:95940485-95940897	1	GGCACCCAAGGTCCAAGCTCTCGGCGGAAGAAGCCAAGGCACCAGCTTCCTGTGGCCTGTCTCTCACACTAGCCC	55	3	n	9.3e-06	+++++++ ++++
chr10:95940485-95940897	76	CGCTTCCGATTGGTCGAAGCCTCGGGCCGGCCCTCCCTCCGGCCCCGCCCTCCCCGCGGATGGACAGGCCGAGGA GGCGGGGCTGCAGCGGCTccgcccctcggccccgggcgggcgggcccgcccAGCTGTCAGTTACGGGGGCGGCCC	78	1	y	2.4e-06	++++++++++++++
chr10:95940485-95940897	76	CGCTTCCGATTGGTCGAAGCCTCGGGCCGGCCCTCCCTCCGGCCCCGCCCTCCCCGCGGATGGACAGGCCGAGGA GGCGGGGCTGCAGCGGCTccgcccctcggccccgggcgggcgggcccgcccAGCTGTCAGTTACGGGGGCGGCCC	117	2	n	2.7e-08	+++++++++ ++++
chr10:95940485-95940897	76	CGCTTCCGATTGGTCGAAGCCTCGGGCCGGCCCTCCCTCCGGCCCCGCCCTCCCCGCGGATGGACAGGCCGAGGA GGCGGGGCTGCAGCGGCTccgcccctcggccccgggcgggcgggcccgcccAGCTGTCAGTTACGGGGGCGGCCC	131	3	y	3.9e-05	+++ +++++++
chr10:95940485-95940897	76	CGCTTCCGATTGGTCGAAGCCTCGGGCCGGCCCTCCCTCCGGCCCCGCCCTCCCCGCGGATGGACAGGCCGAGGA GGCGGGGCTGCAGCGGCTccgcccctcggccccgggcgggcgggcccgcccAGCTGTCAGTTACGGGGGCGGCCC	145	2	y	9.9e-08	+++++++++++++
chr10:95940485-95940897	76	CGCTTCCGATTGGTCGAAGCCTCGGGCCGGCCCTCCCTCCGGCCCCGCCCTCCCCGCGGATGGACAGGCCGAGGA GGCGGGGCTGCAGCGGCTccgcccctcggccccgggcgggcgggcccgcccAGCTGTCAGTTACGGGGGCGGCCC	166	2	n	2.3e-06	++ +++++++++
chr10:95940485-95940897	76	CGCTTCCGATTGGTCGAAGCCTCGGGCCGGCCCTCCCTCCGGCCCCGCCCTCCCCGCGGATGGACAGGCCGAGGA GGCGGGGCTGCAGCGGCTccgcccctcggccccgggcgggcgggcccgcccAGCTGTCAGTTACGGGGGCGGCCC	183	2	y	3.1e-05	+++ +++++++ +
chr10:95940485-95940897	76	CGCTTCCGATTGGTCGAAGCCTCGGGCCGGCCCTCCCTCCGGCCCCGCCCTCCCCGCGGATGGACAGGCCGAGGA GGCGGGGCTGCAGCGGCTccgcccctcggccccgggcgggcgggcccgcccAGCTGTCAGTTACGGGGGCGGCCC	202	3	n	1.7e-05	++++++++++ +++
chr10:95940485-95940897	301	GGCCGCCAAAGCCGCGTCCACCGCCGCCTCTTCCCCGCCCTCCTCCCTCCCGGCTCGGCTGCCGGCCCCTCGCGC	332	2	n	1.4e-06	++++++++ ++ +
chr4:28812950-28813215	1	GACTCCGCTCGGCGTTGATTGGCTCCTGCTCAGGACCCCGCCTCCAAGGTAGAGGCGGCCACTTCGTAGGGACCC GCCCCCCGGCCGTGGGAATCGCCGCCTAGCAGGCGGGCTGCGGCTGCCACTCAGTCGGAGTGGCGGAGGCTCTGG	12	1	y	1e-05	+ +++++++++
chr4:28812950-28813215	1	GACTCCGCTCGGCGTTGATTGGCTCCTGCTCAGGACCCCGCCTCCAAGGTAGAGGCGGCCACTTCGTAGGGACCC GCCCCCCGGCCGTGGGAATCGCCGCCTAGCAGGCGGGCTGCGGCTGCCACTCAGTCGGAGTGGCGGAGGCTCTGG	35	2	n	1.1e-05	++++++++++
chr4:28812950-28813215	1	GACTCCGCTCGGCGTTGATTGGCTCCTGCTCAGGACCCCGCCTCCAAGGTAGAGGCGGCCACTTCGTAGGGACCC GCCCCCCGGCCGTGGGAATCGCCGCCTAGCAGGCGGGCTGCGGCTGCCACTCAGTCGGAGTGGCGGAGGCTCTGG	71	2	n	6.5e-06	+ ++++++++++
chr4:28812950-28813215	1	GACTCCGCTCGGCGTTGATTGGCTCCTGCTCAGGACCCCGCCTCCAAGGTAGAGGCGGCCACTTCGTAGGGACCC GCCCCCCGGCCGTGGGAATCGCCGCCTAGCAGGCGGGCTGCGGCTGCCACTCAGTCGGAGTGGCGGAGGCTCTGG	117	3	n	1.2e-05	+++++ ++ +++
chr4:28812950-28813215	151	GTTCGTAGCCCCGCCTCCTCCCCCCTAATTGATATTATTGGAGTGTGGAGCAAGCGGCCGGTCTGCAGTCGGAGA	158	2	n	2.2e-08	++++++++++++++
chr6:100287410-100287708	76	GTGACTGACGAggggcggggccgggcgccgcgcgTCACGCGCCGGGCAACCAATAAGAGGACGACGACCGGCGCC GCGggggcggggcgtagcgcgcgggagggcggggcgccgcgggggggcggggcggccggcgtgcgtgcccgggag	83	2	y	4.8e-07	++++++++++++
chr6:100287410-100287708	76	GTGACTGACGAggggcggggccgggcgccgcgcgTCACGCGCCGGGCAACCAATAAGAGGACGACGACCGGCGCC GCGggggcggggcgtagcgcgcgggagggcggggcgccgcgggggggcggggcggccggcgtgcgtgcccgggag	122	1	n	7.6e-07	++++++++ +++++
chr6:100287410-100287708	76	GTGACTGACGAggggcggggccgggcgccgcgcgTCACGCGCCGGGCAACCAATAAGAGGACGACGACCGGCGCC GCGggggcggggcgtagcgcgcgggagggcggggcgccgcgggggggcggggcggccggcgtgcgtgcccgggag	150	2	y	1.9e-07	+ +++++++++++
chr6:100287410-100287708	76	GTGACTGACGAggggcggggccgggcgccgcgcgTCACGCGCCGGGCAACCAATAAGAGGACGACGACCGGCGCC GCGggggcggggcgtagcgcgcgggagggcggggcgccgcgggggggcggggcggccggcgtgcgtgcccgggag	172	2	y	1.3e-07	+++ +++++++++
chr6:100287410-100287708	76	GTGACTGACGAggggcggggccgggcgccgcgcgTCACGCGCCGGGCAACCAATAAGAGGACGACGACCGGCGCC GCGggggcggggcgtagcgcgcgggagggcggggcgccgcgggggggcggggcggccggcgtgcgtgcccgggag	190	2	y	2.2e-08	+++++++++++++
chr15:78174077-78174575	1	GGCTCCTGGCAACCATCATCAACCCGCCTTCTCCCTCCATATTGTCTCCTGATTGGTTGCTCTCAAAAGCTCGGA	21	2	n	3.1e-05	+++++++ ++++
chr15:78174077-78174575	1	GGCTCCTGGCAACCATCATCAACCCGCCTTCTCCCTCCATATTGTCTCCTGATTGGTTGCTCTCAAAAGCTCGGA	46	1	y	4.8e-06	++ +++++++++++
chr15:78174077-78174575	76	GACCCCAGGCACCCAATAGAAGAAGGAGGCGGGGAAAACCGGTTCCCTTCGCGGAACAAAGCGGAGAGGTTTCTG	97	2	y	1.2e-06	+ +++++++++++
chr15:78174077-78174575	151	CTCTTTAACTGCTCTCAGCTTGGCCAATGGCTTTAGATGCTGTCAATCACCGCTGGGCACCGCCTAGCGTCTCTG	188	3	n	6.5e-07	++++++++++++
chr15:78174077-78174575	226	GAGACGCAGCCCAACCAGGATGCAGCCGGAGGCGGGAATTAATGGGGCTTTCTGATTGGCCAGAGCATGGCTTTA	250	2	y	1.3e-05	+ ++++++++++
chr15:78174077-78174575	226	GAGACGCAGCCCAACCAGGATGCAGCCGGAGGCGGGAATTAATGGGGCTTTCTGATTGGCCAGAGCATGGCTTTA	274	1	y	5.3e-07	+++++++++++++
chr8:47533403-47533833	1	AGGAATGCGGCCACCGACAAGCAACAGCCCCAGCCGCAGACCGGGCGACAGAAGGCGACACTTCCTTTTCCCCGC CTCCGCTGGCACAGGAAGCACTTCCTGGGCTTGAGTGACAGCACTCCACACCAGTCCTGGAATAGAACGGGTTTC	69	2	n	8.8e-06	++++++++++ +
chr8:47533403-47533833	1	AGGAATGCGGCCACCGACAAGCAACAGCCCCAGCCGCAGACCGGGCGACAGAAGGCGACACTTCCTTTTCCCCGC CTCCGCTGGCACAGGAAGCACTTCCTGGGCTTGAGTGACAGCACTCCACACCAGTCCTGGAATAGAACGGGTTTC	105	3	y	7.2e-07	+++++ +++++++
chr8:47533403-47533833	151	CTTGTTAGGAAGGTGTTCCATTTCCTAGAGGAGAAAGAGTTGGGGGCGGAAAGAGAAGGAGCCAATAGGAGACGC	189	2	y	1.6e-05	+ ++++++++ +
chr8:47533403-47533833	151	CTTGTTAGGAAGGTGTTCCATTTCCTAGAGGAGAAAGAGTTGGGGGCGGAAAGAGAAGGAGCCAATAGGAGACGC	209	1	n	1.3e-05	+++++++ ++++
chr8:47533403-47533833	226	GATCGTGAGAAGGGGCGGGGCTTCCTCGGTACCGCCCATCAGTAACTGGTCAGAGGTCTAGGTGTCCCTTAACGT	233	2	y	8e-08	+++++++++++++
chr10:81600942-81601194	1	TAGGCCACACCCACACACCACGCCCCCTGCACCCACCGAGGGAAGCGTGTATCAGGGCCCAGGCCACGGTGCACG	17	2	n	5.2e-05	++ ++++++++ +
chr10:81600942-81601194	76	TGGGCCCCGGACTCAGCGAACCGCCCCTGCAGGCCCTGACCAATCAGAAGGCGGCGAGCCCACGTGGGCTGCGAG	112	1	n	2.7e-07	++++++++++++++
chr10:81600942-81601194	151	CCAGAATGCTCATTGCTCAGTTTGTGGCCGTGCTGTCAATCACGGAGTTCCTGCTTCGGCTTAACCCTCGCGTTC	181	3	n	3e-07	+++++++++++++
chr2:161109059-161109434	1	AAGGACACCCTAACCCAGCTTGGGCCCGCCTTCCCTGCCGCGCTATTGGGTTTCGCCTGCCCAAAACACAGGTTC	23	2	n	8.8e-06	+ +++++++ +++
chr2:161109059-161109434	76	ATTGGTCGTGTGGGCTGCCGATCAGACAGAAGCCCGTTTCAAGCTTGCTTGCAGGAGCGAGTGATGGGCTTGCTC	88	3	n	7.7e-05	+++++ + ++++
chr2:161109059-161109434	151	CATTGTGCTCGTATTTGCATGGATGTGATCGCAGCGGTGATTGGTCGATGTCGGAGCCGCTCCGCCTCCCAGCCT	184	1	y	1.6e-05	+ ++++++++++
chr2:161109059-161109434	151	CATTGTGCTCGTATTTGCATGGATGTGATCGCAGCGGTGATTGGTCGATGTCGGAGCCGCTCCGCCTCCCAGCCT	209	2	n	5.3e-06	++ +++++++++
chr2:161109059-161109434	226	AGATCTCCCCGCCTTGCAGACAGCGCAGCTCCCGGCCCGCCCCCCCGGAATGAAGCGGCCGGGCCGCGggggcgg ggcggggctggggtcccgcaggcggagggggcggggcggggtgCTGCGCTCTGTTTTGCAAGCAGGGGGCGAGGA	231	2	n	7.1e-05	++++++++ +
chr2:161109059-161109434	226	AGATCTCCCCGCCTTGCAGACAGCGCAGCTCCCGGCCCGCCCCCCCGGAATGAAGCGGCCGGGCCGCGggggcgg ggcggggctggggtcccgcaggcggagggggcggggcggggtgCTGCGCTCTGTTTTGCAAGCAGGGGGCGAGGA	259	2	n	9e-07	+ +++++++++++
chr2:161109059-161109434	226	AGATCTCCCCGCCTTGCAGACAGCGCAGCTCCCGGCCCGCCCCCCCGGAATGAAGCGGCCGGGCCGCGggggcgg ggcggggctggggtcccgcaggcggagggggcggggcggggtgCTGCGCTCTGTTTTGCAAGCAGGGGGCGAGGA	290	2	y	1.9e-07	+ +++++++++++
chr2:161109059-161109434	226	AGATCTCCCCGCCTTGCAGACAGCGCAGCTCCCGGCCCGCCCCCCCGGAATGAAGCGGCCGGGCCGCGggggcgg ggcggggctggggtcccgcaggcggagggggcggggcggggtgCTGCGCTCTGTTTTGCAAGCAGGGGGCGAGGA	324	2	y	1.1e-09	++++++++++++++
chr2:161109059-161109434	226	AGATCTCCCCGCCTTGCAGACAGCGCAGCTCCCGGCCCGCCCCCCCGGAATGAAGCGGCCGGGCCGCGggggcgg ggcggggctggggtcccgcaggcggagggggcggggcggggtgCTGCGCTCTGTTTTGCAAGCAGGGGGCGAGGA	362	2	y	3.8e-05	+ ++++++++ ++
chr13:37857749-37858075	76	GCTCCTCACCTCCGCTCCAGTGCTGGGCACTCCGCGAGCGGGCCGTGGAGCTGTCAGTCACGGCAGCGCCGCCGC CGATTGGCTGAGGCGGCAGCGGGGGGTGGGGCAGAGCGCTGGCATCCCCCGATGGGACCTTGAAGCTCTGCTCTC	124	3	n	2e-07	++++++++++++++
chr13:37857749-37858075	76	GCTCCTCACCTCCGCTCCAGTGCTGGGCACTCCGCGAGCGGGCCGTGGAGCTGTCAGTCACGGCAGCGCCGCCGC CGATTGGCTGAGGCGGCAGCGGGGGGTGGGGCAGAGCGCTGGCATCCCCCGATGGGACCTTGAAGCTCTGCTCTC	147	1	y	4.8e-06	++ +++++++++++
chr13:37857749-37858075	76	GCTCCTCACCTCCGCTCCAGTGCTGGGCACTCCGCGAGCGGGCCGTGGAGCTGTCAGTCACGGCAGCGCCGCCGC CGATTGGCTGAGGCGGCAGCGGGGGGTGGGGCAGAGCGCTGGCATCCCCCGATGGGACCTTGAAGCTCTGCTCTC	169	2	y	2e-06	+ ++++++ +++++
chr4:137862126-137862358	1	TAAGGAGCCCGCGGAGGTGTGGGGGGGAGTCTAACCGACGCTTCTGATTGGCTGTTTCTTCGGGGCCCGCAGCCC	41	1	y	1.7e-08	++++++++++++++
chr4:137862126-137862358	76	CCGCACTTCTGTATTGGTTCGCGGCGGGCCCCGCCCTCTGGCCTGGGCGCCCCAGCCTCGCGCGCCGCCCCGGCA	103	2	n	2.3e-07	+++++++++ ++
chr6:146888366-146888698	1	AGGAATGTGGGAGACCAGGCGCCGCCTCGGAGTGACCGCGCGCCCGGCCAATCAGCGGGCCGCAAGCGCGAGGCC CCGCCCCCTCCGCCCCTGGGGCTGGTTCCCGCCGGGGGAGGGGCGGGGCGGTGGGACGAGGAGGACCGAGGGGAG	45	1	n	4.8e-06	+++++++++++ ++
chr6:146888366-146888698	1	AGGAATGTGGGAGACCAGGCGCCGCCTCGGAGTGACCGCGCGCCCGGCCAATCAGCGGGCCGCAAGCGCGAGGCC CCGCCCCCTCCGCCCCTGGGGCTGGTTCCCGCCGGGGGAGGGGCGGGGCGGTGGGACGAGGAGGACCGAGGGGAG	73	2	n	1.1e-09	++++++++++++++
chr6:146888366-146888698	1	AGGAATGTGGGAGACCAGGCGCCGCCTCGGAGTGACCGCGCGCCCGGCCAATCAGCGGGCCGCAAGCGCGAGGCC CCGCCCCCTCCGCCCCTGGGGCTGGTTCCCGCCGGGGGAGGGGCGGGGCGGTGGGACGAGGAGGACCGAGGGGAG	111	2	y	1.4e-08	++++++++++++++
chr6:146888366-146888698	226	GGGCGGCCGCGTCGAGAGTGGCGATCTGGCAGCCGGGCGGGTCCCGGGAGGCGGAACTGCAACTTGTGGAGCTCG	269	2	y	7.9e-06	+++++++++ ++
chr1:136624659-136625112	1	TGGCGTCCCCGGACTTCCCGCCCCTTGGGCTCCACCTCCGGAGCGCCTTCTCCCTAGAAACCCTCAGCCACTGTC TGCCCCTCAGCAGGGCCACCAATCACGTCCCCTCGCTGCGGAAGACCCTCCGCTGTCCGCCTCCAAGTCCCCGCC CCTCCCACCTAGCCCCCAGCAGCTCCGCCCAACCGCCCGCTTGATTGACAGGCTAGCCAGGCGGAAACTGAGGCG	15	2	n	4.7e-06	+++++++++++
chr1:136624659-136625112	1	TGGCGTCCCCGGACTTCCCGCCCCTTGGGCTCCACCTCCGGAGCGCCTTCTCCCTAGAAACCCTCAGCCACTGTC TGCCCCTCAGCAGGGCCACCAATCACGTCCCCTCGCTGCGGAAGACCCTCCGCTGTCCGCCTCCAAGTCCCCGCC CCTCCCACCTAGCCCCCAGCAGCTCCGCCCAACCGCCCGCTTGATTGACAGGCTAGCCAGGCGGAAACTGAGGCG	73	3	n	8.3e-05	+ +++ + +++
chr1:136624659-136625112	1	TGGCGTCCCCGGACTTCCCGCCCCTTGGGCTCCACCTCCGGAGCGCCTTCTCCCTAGAAACCCTCAGCCACTGTC TGCCCCTCAGCAGGGCCACCAATCACGTCCCCTCGCTGCGGAAGACCCTCCGCTGTCCGCCTCCAAGTCCCCGCC CCTCCCACCTAGCCCCCAGCAGCTCCGCCCAACCGCCCGCTTGATTGACAGGCTAGCCAGGCGGAAACTGAGGCG	129	2	n	9.3e-05	++++++++
chr1:136624659-136625112	1	TGGCGTCCCCGGACTTCCCGCCCCTTGGGCTCCACCTCCGGAGCGCCTTCTCCCTAGAAACCCTCAGCCACTGTC TGCCCCTCAGCAGGGCCACCAATCACGTCCCCTCGCTGCGGAAGACCCTCCGCTGTCCGCCTCCAAGTCCCCGCC CCTCCCACCTAGCCCCCAGCAGCTCCGCCCAACCGCCCGCTTGATTGACAGGCTAGCCAGGCGGAAACTGAGGCG	143	2	n	5.6e-07	+++++++++++++
chr1:136624659-136625112	1	TGGCGTCCCCGGACTTCCCGCCCCTTGGGCTCCACCTCCGGAGCGCCTTCTCCCTAGAAACCCTCAGCCACTGTC TGCCCCTCAGCAGGGCCACCAATCACGTCCCCTCGCTGCGGAAGACCCTCCGCTGTCCGCCTCCAAGTCCCCGCC CCTCCCACCTAGCCCCCAGCAGCTCCGCCCAACCGCCCGCTTGATTGACAGGCTAGCCAGGCGGAAACTGAGGCG	172	2	n	1.2e-05	++ +++++++ ++
chr1:136624659-136625112	1	TGGCGTCCCCGGACTTCCCGCCCCTTGGGCTCCACCTCCGGAGCGCCTTCTCCCTAGAAACCCTCAGCCACTGTC TGCCCCTCAGCAGGGCCACCAATCACGTCCCCTCGCTGCGGAAGACCCTCCGCTGTCCGCCTCCAAGTCCCCGCC CCTCCCACCTAGCCCCCAGCAGCTCCGCCCAACCGCCCGCTTGATTGACAGGCTAGCCAGGCGGAAACTGAGGCG	190	3	y	6.9e-09	++++++++++++++
chr4:155812316-155812664	76	ACGGACTGGTCGTACGGCCAACGGCGTCGAGACAGCGGTGACGTTCAGCCAATGGGAGGGGGCGGGGCGGGGCGG	130	2	y	1.1e-09	++++++++++++++
chr10:60002714-60003356	76	CACGGCGCAGGCGCCAACCCGCCCCACGCATGCTCAGTCGGATGACGCTGCCTTTGCATACGGCCGGCGCGGGCG	91	2	n	7.1e-05	++++++++ + +
chr10:60002714-60003356	226	GTTCTCGGCCACTTACCTCAGCAGCTTGTGCACTTTGACTGACAGCCCCGCCCCTTGGACGAAGCCGTGCGGCCT	259	3	y	1.5e-07	+++++++++++++
chr10:60002714-60003356	376	TCCCTGCGGCGGTGAGGGCTAGAGGGCGGTGCTAGCGCGCATGCGTGGAGGGGGCGGAGCCCGGCTGGGCCAGAC	394	2	y	5.6e-05	++ ++++++ ++
chr10:60002714-60003356	376	TCCCTGCGGCGGTGAGGGCTAGAGGGCGGTGCTAGCGCGCATGCGTGGAGGGGGCGGAGCCCGGCTGGGCCAGAC	422	2	y	8e-08	+++++++++++ ++
chr10:60002714-60003356	451	CGAGCTTTCCGAGAACACTTCCGGGTCGCTGTGGCTGCCCCGCCCCCTTCCCCGCCCCAGTCCCCCGCAGTTTTG	487	2	n	3.2e-09	++++++++++++ +
chr10:60002714-60003356	526	GTTTTCTTGCGTTGGTGCTGTCTGCTCCGCCTCTCTAGCGTAGGATGTTCAGCGTTTGCTTTTTATGTGAGAATT	549	2	n	1.8e-05	++ +++++++++
chr15:79741391-79742732	1	AGTTCCCCCCATGACTGCCACCCCCACCTGACAGCTCCAGATGCCCATATGCTCCACCTCTTAACCCCTGCCCCG	51	2	n	9.9e-05	++ ++ ++++++
chr15:79741391-79742732	151	GAATCTAAACGTTCTGAGTAGGTGGAGAGGTGGGGCACCGAACACTGCCCCGTGTGCCACCTCCCAGCACTCCCA	173	2	y	2.8e-05	+++++++ +++++
chr15:79741391-79742732	901	CAGGCGGGCGCGGGGCCGTGGGGAGGCGGGCCCAATCCCTTCTTTACCTTGCGTGGTTCTTCCCGCGTCGGAGTc	919	2	y	1.2e-05	+++++++++++ +
chr15:79741391-79742732	1126	GCGTGGCCGAGTGTGTATGTGTGCGCCTGTCAATCAACGCTGACAGCCCACAAGTCATTggccgggcccagccgg	1150	3	n	4.7e-08	+++++++++++++
chr15:79741391-79742732	1201	cccgccccgcccTCTGCCGCCGCCCATTGGTTGATTTGAACACAAAGGCTCCGGCTCGGCCCGCCCTCCGCGTGG	1204	2	n	6.4e-08	+++++++++ ++ +
chr15:79741391-79742732	1201	cccgccccgcccTCTGCCGCCGCCCATTGGTTGATTTGAACACAAAGGCTCCGGCTCGGCCCGCCCTCCGCGTGG	1220	1	y	1.3e-05	++ ++ ++++++++
chr15:79741391-79742732	1201	cccgccccgcccTCTGCCGCCGCCCATTGGTTGATTTGAACACAAAGGCTCCGGCTCGGCCCGCCCTCCGCGTGG	1258	2	n	2.3e-06	+ +++++++ ++ +
chr15:79741391-79742732	1276	GCCCTGTAGTCCGCGCGTGGGAGGCGGGGGCGAGTACGACCTCCAGGCTGTGGGACCCGAGCGTTC	1292	2	y	1.1e-05	+ +++++++++++
chr7:102209890-102210677	76	GGTACAGAGAGGAAGATCTACCCGCCCAGCCCCGGCAGCGCTCCCGACTTACAGCGGTGCGTCTGGAGTGAGAGC	94	2	n	8.4e-05	++++++++ +++
chr7:102209890-102210677	226	ccgccgcTTCGGGCGCAGCGCGCAGAGGCCTGACTGCGTCACACGCCGTCCACCGTCAGAGATCGGCTCCGGCCG CTCCGCCCTTGGCGGCCGGGCATTGGCGGGCCGGTCCGCCACTCGAGGCCCACACCGTTATTCATTGGGTGACGA	300	2	n	7.2e-06	++ ++++++ + +
chr7:102209890-102210677	376	TCCTTTTGAAACCGAACGTGGAGGCGGTCTCTGATTAggaacggaggggaagaggaggagcgtaaggaattgccg	423	2	y	8.4e-05	++++++++ ++ ++
chr7:102209890-102210677	451	ggaaaggggggggggggggggaaaggagggacgatggggagggATGTAGAGTCCCACTCCCTCTGCCGCAACGGT	469	2	y	9.9e-05	++++ +++ +++++
chr7:102209890-102210677	601	ACCGCAGTGACGCTGTGTCCAGGCCCCGCCCCCTTCCTTGGAGCGCGGAGACTCGCTACGGAAGCTCCGGCCAAT CAGAAGGAAGTCCCAAGGATGACCTGGTAATTGTTCTATCCTTCTCTAGCTCCTGTCTGCGGGCAATGATGGGAA	623	2	n	3.2e-09	++++++++++++ +
chr7:102209890-102210677	601	ACCGCAGTGACGCTGTGTCCAGGCCCCGCCCCCTTCCTTGGAGCGCGGAGACTCGCTACGGAAGCTCCGGCCAAT CAGAAGGAAGTCCCAAGGATGACCTGGTAATTGTTCTATCCTTCTCTAGCTCCTGTCTGCGGGCAATGATGGGAA	668	1	n	3.7e-07	++++++++++++++
chrX:152342414-152342771	76	CCAGGCCCCGCCCACTCCCTGGCATGGCGTCTGCTCTGCCCGCCATTGGCTGCAGGCCTCGGAGCTGGCGGTAGC	80	2	n	7.9e-09	++++++++++++++
chrX:152342414-152342771	76	CCAGGCCCCGCCCACTCCCTGGCATGGCGTCTGCTCTGCCCGCCATTGGCTGCAGGCCTCGGAGCTGGCGGTAGC	114	1	y	7e-05	++ + ++++++++
chrX:152342414-152342771	226	TTCGCGCCCACCAATCATCAGGCTGACTGCCCCTCAGTGATGAGAGGAAAACTGCGGGGCGATTGGCTATGAGGA	233	1	n	8.6e-05	+ ++++++++ ++
chrX:152342414-152342771	301	AAGCTAGGGTAGGAGCCCCCTCACCCTCAGTCTTGCAATGTTTTAGCCAATGGGAAA	344	1	n	2.4e-06	++++++++ ++++
chr15:82345850-82346499	1	GAGCCCTGGCGGCCCCGCCCTCTGGAGTCCGGGAGGGGCGTCCTTCTCCTGACGTCACTACGTCGTCCGGGCGCC	12	2	n	2.3e-07	+++++++++ ++
chr15:82345850-82346499	76	GAGGACTTTCCCACCGGCATACGAATGCGTGCTCTGCGCAGGCGGGAGGGCGGTGCTTCCCGTGTGTGTCACGAG	118	2	y	3.8e-05	+++ ++++++ ++
chr15:82345850-82346499	151	TCTCGCGAGTTTTGGAGAAAGTTTCTGCCAGAGGCCGCCTTGGATGCGTGGGGTGTGGCTCCCGGCGAGGGGCGG AGCTGGAGATGGCGTCCACGGCGGCTCGGCGGCTGGCCTGGGTTGCAGTTCGACCCGGGGCTCTCTGGAGCGGGC	215	2	y	1e-06	+ +++++++++ ++
chr15:82345850-82346499	376	TCATCGTCACTCGCAGCGGCGCCATTTTGCCCAAGCCGGTGAAAGTGAGTGTCTGTCTTGAGGCGGGACGAAGGG	431	2	y	4.9e-05	++++++++++
chr15:82345850-82346499	451	ATTGAGGCCGGTGATTGGGGGAGTGCATGTGACCTGTCCTGATTGACAGGCGCAGAGGCCAATCATAGTATTGGC	488	3	y	4.7e-08	+ ++++++++++++
chr15:82345850-82346499	451	ATTGAGGCCGGTGATTGGGGGAGTGCATGTGACCTGTCCTGATTGACAGGCGCAGAGGCCAATCATAGTATTGGC	506	1	n	3.6e-05	+++++++++ ++
chr10:81648942-81649228	1	AGTCCCTGAGGGCTACTCTGTCCCTAAGGAAGATGCTCCTGTCACTCAGGCCTCATTAGCCAATCAGAGTCTCGA	37	3	n	1.3e-06	+++++++ +++ +
chr10:81648942-81649228	1	AGTCCCTGAGGGCTACTCTGTCCCTAAGGAAGATGCTCCTGTCACTCAGGCCTCATTAGCCAATCAGAGTCTCGA	57	1	n	3.7e-07	+++++++++++++
chr10:81648942-81649228	76	GGCAGCTGAGTGGAGGCGGGAACTTCCGGTCCGCCATTCTCAGGTTTGACTGCGAGTCTGAGGGAAGCTCTAGTG	84	2	y	1.1e-05	+ ++++++++++
chr8:72492630-72493092	1	CGGGCAGGGGGCGGGACAGCCCTGGAGGGCGCGCCGGCAGACGCCGCTCACCATTGGCCCCTGGCCCTTGCGTCA	4	2	y	6.4e-08	+ ++++++++++++
chr8:72492630-72493092	76	TCGCCGCTCGCCATTGGCCACCGCCCCATACGTCATCGTCGCGCGTCCGCCGACGCGCCCGTACACGTCGTCGGC	82	1	y	9.7e-05	++ + ++++++++
chr8:72492630-72493092	151	GAGGGCCCTACCCTCACTTAAACGCTTTCCGGGAGGGGGCGGGGCTAAGCCCGGAAGGCGGGCCGTAGGGCCCGC	182	2	y	1.1e-09	++++++++++++++
chr8:72492630-72493092	151	GAGGGCCCTACCCTCACTTAAACGCTTTCCGGGAGGGGGCGGGGCTAAGCCCGGAAGGCGGGCCGTAGGGCCCGC	201	2	y	1.2e-05	++ +++++++ +
chr8:72492630-72493092	226	GGGTGGGTTAAGCGCGTTACGTTCTCTCCGGTGACTGGCAGGACTCCGTGGGAGGTGCCGGGCGACGCGGGCCCG CCCACTTGAGGCTGTGGAAGCCGCGTGCCTGGGGCGTAGACAGGGCTTAGATCTTTTAGAAGAAAAGAAACCGAT	255	3	y	1.2e-05	+++++++ ++++
chr8:72492630-72493092	226	GGGTGGGTTAAGCGCGTTACGTTCTCTCCGGTGACTGGCAGGACTCCGTGGGAGGTGCCGGGCGACGCGGGCCCG CCCACTTGAGGCTGTGGAAGCCGCGTGCCTGGGGCGTAGACAGGGCTTAGATCTTTTAGAAGAAAAGAAACCGAT	295	2	n	2.3e-06	+ ++++++++++
chr12:24831331-24831754	1	GGAGGAGGGGCGCGGCGAGGCCAGCGTCCTCTGATTGGCTGTGGGAGTCGGGGCGCCGCGACGCCATTGGACCGC	28	1	y	6.8e-08	++++++++++++++
chr12:24831331-24831754	151	cgtgagggggccgcgcggctgggtgggcggggcgcccAGCAGTGGGCGGGGCCACTAACTCCGCCCACTGCCCCT	170	2	y	1e-06	+++++++++++++
chr12:24831331-24831754	151	cgtgagggggccgcgcggctgggtgggcggggcgcccAGCAGTGGGCGGGGCCACTAACTCCGCCCACTGCCCCT	189	2	y	4.9e-08	+ ++++++++++++
chr12:24831331-24831754	151	cgtgagggggccgcgcggctgggtgggcggggcgcccAGCAGTGGGCGGGGCCACTAACTCCGCCCACTGCCCCT	208	2	n	6.5e-06	+ +++++++++ +
chr12:24831331-24831754	226	CCCCGCGCGGCTGCTCCGAccgcgggcggccgaggggcgggcgcgccgcTGCATCCCCATCCTCGGCGTAGCTCG	255	2	y	4e-05	++++++++++
chr1:131827654-131828172	151	AGCACCGCGAGCCCACAACACCCTCCAATTCTGAGTTCCCGTCACTCTGCTGCGTTTTCCCCCTCACCCCGCCCC CAGCTCAAGAAACGCCGGGGAAATGGGCGGGGCCTGGGCGGGGCCCGCCCCTTTTCCTGCTCTGATTGGCTGATG	187	3	n	7.7e-05	++ ++++ ++
chr1:131827654-131828172	151	AGCACCGCGAGCCCACAACACCCTCCAATTCTGAGTTCCCGTCACTCTGCTGCGTTTTCCCCCTCACCCCGCCCC CAGCTCAAGAAACGCCGGGGAAATGGGCGGGGCCTGGGCGGGGCCCGCCCCTTTTCCTGCTCTGATTGGCTGATG	216	2	n	1.4e-06	++++++++++ +
chr1:131827654-131828172	151	AGCACCGCGAGCCCACAACACCCTCCAATTCTGAGTTCCCGTCACTCTGCTGCGTTTTCCCCCTCACCCCGCCCC CAGCTCAAGAAACGCCGGGGAAATGGGCGGGGCCTGGGCGGGGCCCGCCCCTTTTCCTGCTCTGATTGGCTGATG	245	2	y	9.9e-08	+ ++++++++++++
chr1:131827654-131828172	151	AGCACCGCGAGCCCACAACACCCTCCAATTCTGAGTTCCCGTCACTCTGCTGCGTTTTCCCCCTCACCCCGCCCC CAGCTCAAGAAACGCCGGGGAAATGGGCGGGGCCTGGGCGGGGCCCGCCCCTTTTCCTGCTCTGATTGGCTGATG	267	2	n	3e-06	+ ++++++++++
chr1:131827654-131828172	151	AGCACCGCGAGCCCACAACACCCTCCAATTCTGAGTTCCCGTCACTCTGCTGCGTTTTCCCCCTCACCCCGCCCC CAGCTCAAGAAACGCCGGGGAAATGGGCGGGGCCTGGGCGGGGCCCGCCCCTTTTCCTGCTCTGATTGGCTGATG	284	1	y	1.2e-07	+++++++++++++
chr19:41981092-41981759	1	CAGACCGGTGGCGGCAGCCATGACGCTAGCCAGAGATTGTGGGAGGGGGAAGTGGGTGTGGCTACGAGATGTGTC	49	2	y	9.9e-05	+ ++++++ + +++
chr19:41981092-41981759	76	TCTCCGCGCACGCGCCTCCATGGCCAATAGTTGGGCGCAGACTTCAGGGGCGGGGCACCTCCAGGTCACGTGCCT	118	2	y	7.9e-06	+++++++++++
chr19:41981092-41981759	151	GCCGGCTCTGGGCCAGGCAGTCCCTTCAGGGACCTAACGGCCCCTCCCCAGAGGGCGGGGCCTGGGCCGGGGCGC	198	2	y	2.3e-07	++ +++++++++
chr19:41981092-41981759	301	CGGGAGACGGGCGACAGGGCGGGCACCTGGCTGGGTGGGGCCGAGGGGCGGTACGCATCCTGGGAAAAGCCAATG AGAAAACCAGACCCGGCCCGAGGGGCGGTGCCGTCGGTCACATGCGCACCTGGGGCGGCTGGCGACCGTGGCGCG	312	2	y	5.9e-05	++ +++++++
chr19:41981092-41981759	301	CGGGAGACGGGCGACAGGGCGGGCACCTGGCTGGGTGGGGCCGAGGGGCGGTACGCATCCTGGGAAAAGCCAATG AGAAAACCAGACCCGGCCCGAGGGGCGGTGCCGTCGGTCACATGCGCACCTGGGGCGGCTGGCGACCGTGGCGCG	341	2	y	7.5e-05	+++++++++ ++
chr19:41981092-41981759	301	CGGGAGACGGGCGACAGGGCGGGCACCTGGCTGGGTGGGGCCGAGGGGCGGTACGCATCCTGGGAAAAGCCAATG AGAAAACCAGACCCGGCCCGAGGGGCGGTGCCGTCGGTCACATGCGCACCTGGGGCGGCTGGCGACCGTGGCGCG	367	1	n	2.8e-06	+++++++ ++++
chr19:41981092-41981759	301	CGGGAGACGGGCGACAGGGCGGGCACCTGGCTGGGTGGGGCCGAGGGGCGGTACGCATCCTGGGAAAAGCCAATG AGAAAACCAGACCCGGCCCGAGGGGCGGTGCCGTCGGTCACATGCGCACCTGGGGCGGCTGGCGACCGTGGCGCG	393	2	y	4.9e-05	+++++++++ ++
chr19:41981092-41981759	451	GCCACCCCAAGCGGGAGGAAGGGAgcggggccgggccggggcggggTTAGGCAGGTGAGTGACAGGCTCCGGGGG	484	2	y	1.6e-05	++ +++++++++
chr19:41981092-41981759	451	GCCACCCCAAGCGGGAGGAAGGGAgcggggccgggccggggcggggTTAGGCAGGTGAGTGACAGGCTCCGGGGG	504	3	y	6.5e-07	++++ ++++++++
chr19:41981092-41981759	526	GCCGGCCCCAGCTGGGAGCTCGGAGTGATCCTGGAGTAGCTGCGGCGGTGTCCGCCCCCTCCCTCCGCCCCTCCA	574	2	n	1.1e-05	+++++++++++
chr8:22060454-22060876	1	GGGGGGGAGCGAAGTGGGCGGGGCGAGTGGGGTGGGAGGGGCGAGAGAGCCGGCTGTCCATCACAAGCCACGCCC	11	2	y	2.7e-08	+ ++++++++++++
chr8:22060454-22060876	1	GGGGGGGAGCGAAGTGGGCGGGGCGAGTGGGGTGGGAGGGGCGAGAGAGCCGGCTGTCCATCACAAGCCACGCCC	29	2	y	2.4e-05	++++++++ +++++
chr8:22060454-22060876	1	GGGGGGGAGCGAAGTGGGCGGGGCGAGTGGGGTGGGAGGGGCGAGAGAGCCGGCTGTCCATCACAAGCCACGCCC	52	3	n	1.7e-06	+++++++ +++++
chr8:22060454-22060876	76	CACCACCGCCACCGCAGCGGCGTGGCCCAAGTGGGATGGGCCCGTGTGCGCCCCGCCTGTGGGAAGCGGCTATTA	125	2	n	6.3e-05	+++++++++ +
chr8:22060454-22060876	151	GGCAACCTGCAGGAAGGCGTGTAAGCGGGGGGCGTGGCTAACGGCACACGCTTCCTCAGGAGCCAATAGGATAGA	175	2	y	1.9e-05	+ ++++++++ +++
chr8:22060454-22060876	151	GGCAACCTGCAGGAAGGCGTGTAAGCGGGGGGCGTGGCTAACGGCACACGCTTCCTCAGGAGCCAATAGGATAGA	210	1	n	4.2e-05	+++++++ +++
chr8:22060454-22060876	226	AGAACAGGCAAGCGCTTCCGGGCTGTGAGAGGGGAGGGTGGGATAAGATGGCGGCGGACACTGGGAGCTGGTGCG	256	2	y	2.4e-05	++++ +++ ++++
chr6:47813278-47813886	76	GCCGACCTCCCGAGCGACGCCGGAGCGCACCAAAGCCTCCAGGAAGTTCAGGCCGGTGATTGGTTGGAGGTAAGG	128	1	y	4.2e-06	++ ++++++++++
chr6:47813278-47813886	151	AAGCCGCGGCCCGTCCAATCCCCGCACGAATCAGGGCGAGAGCCGTGGCGCCCCGCCTACACCGCCCCGCCCCGC TGCCTGAGCCCTCCGCGCGGGCGCGCCCCTCAGCTCCGCGTTTAAAACTCCGAGCCCTAGTGTGAGGTGCCCCCT TCTGATTGGCTGTGCCGCGACCACCAATCACGGGCTGCCACTCGGTTTGCTTGGAGCGCCCAGGTCCGGAAAGAG	200	2	n	4e-07	+++++++++++ ++
chr6:47813278-47813886	151	AAGCCGCGGCCCGTCCAATCCCCGCACGAATCAGGGCGAGAGCCGTGGCGCCCCGCCTACACCGCCCCGCCCCGC TGCCTGAGCCCTCCGCGCGGGCGCGCCCCTCAGCTCCGCGTTTAAAACTCCGAGCCCTAGTGTGAGGTGCCCCCT TCTGATTGGCTGTGCCGCGACCACCAATCACGGGCTGCCACTCGGTTTGCTTGGAGCGCCCAGGTCCGGAAAGAG	214	2	n	3.4e-06	++++++++++ +
chr6:47813278-47813886	151	AAGCCGCGGCCCGTCCAATCCCCGCACGAATCAGGGCGAGAGCCGTGGCGCCCCGCCTACACCGCCCCGCCCCGC TGCCTGAGCCCTCCGCGCGGGCGCGCCCCTCAGCTCCGCGTTTAAAACTCCGAGCCCTAGTGTGAGGTGCCCCCT TCTGATTGGCTGTGCCGCGACCACCAATCACGGGCTGCCACTCGGTTTGCTTGGAGCGCCCAGGTCCGGAAAGAG	299	1	y	1.7e-08	++++++++++++++
chr6:47813278-47813886	151	AAGCCGCGGCCCGTCCAATCCCCGCACGAATCAGGGCGAGAGCCGTGGCGCCCCGCCTACACCGCCCCGCCCCGC TGCCTGAGCCCTCCGCGCGGGCGCGCCCCTCAGCTCCGCGTTTAAAACTCCGAGCCCTAGTGTGAGGTGCCCCCT TCTGATTGGCTGTGCCGCGACCACCAATCACGGGCTGCCACTCGGTTTGCTTGGAGCGCCCAGGTCCGGAAAGAG	333	3	n	0.0001	+++++ ++ ++
chr6:47813278-47813886	376	TGCGGGGGAGAACAAAGGCAACCAGCCCTGCACAGGGAGGCGGGGCTTGAGCACTCCGAGGGGAGGGATTGGTTG	408	2	y	4e-07	++++++++++++
chr13:44730510-44731419	1	gggAgggcggcccccgcggggaggggactggggggcggggccggcgTGGGGAGTTCCTCGCTCCCGGACCACACG	28	2	y	1.9e-07	++++++++++++
chr13:44730510-44731419	151	CGGGGAAGGGGGAGGGGGAAGCGATCGGGGAAAAGGGAGTTGAGTGACAGGAGGCGTGGGGCACGCTGGGAATTG	155	2	y	9.9e-05	+ ++++++ ++++
chr13:44730510-44731419	151	CGGGGAAGGGGGAGGGGGAAGCGATCGGGGAAAAGGGAGTTGAGTGACAGGAGGCGTGGGGCACGCTGGGAATTG	189	3	y	1.3e-06	++++ +++++++
chr13:44730510-44731419	451	GGGGGGGAAGGGGCTGAGGTGGAGCGACCGAGCGTGCCATGCATTGAGCTAGGGAGCCTCTCTCAATTCCACGAC	462	2	y	9.3e-05	++ ++++ ++ ++
chr13:44730510-44731419	526	TGGGCTCGGCGTGGGAGAGGCGCCTGACGGGCGGCCCGCAGAGGCTTCGTGGAGGCCTTTCCGGGGTCTCGTCGA	548	3	y	8.8e-05	+ ++++ + + +++
chr13:44730510-44731419	751	AAGTTGGGCTGGCTAGCCTCTCTCTCATTGGTTAAGGGGCTTGGAAAAAAGAGACTCGGCGAGCCCTCCGCTGTG	771	1	y	7.6e-07	++++ ++++++++
chr12:8640766-8641286	226	GTCTGTGCACGCGCTCTGCTTGAGAGTGCTGGTCTGTGGCGGGAAGTCCCGCCCACTCCGCTGTGATTGACGGCA	271	2	n	6.4e-08	++++++++++++++
chr12:8640766-8641286	226	GTCTGTGCACGCGCTCTGCTTGAGAGTGCTGGTCTGTGGCGGGAAGTCCCGCCCACTCCGCTGTGATTGACGGCA	287	3	y	7.7e-06	+++++++++ ++
chr12:8640766-8641286	301	GCAGCTTCCAATCGGGAAGCTTCCCCACTCACTGTTTCCAGGAGCAGGGAACAGCGCCAGAAGTCCCGCCCGCCC GACCGTGACTGACAGCCCCAGAGACTGAAAccgcccccccccgccccccgcAGAGAGATCCGCGTCTGCAAAGAC AAGGGCGGGCGGCCGTGATTTTTATATAAAATaaaaaaagtctcgtgtgcttatcgtgtgggagctcacg	363	2	n	1.3e-05	+++++++++ +++
chr12:8640766-8641286	301	GCAGCTTCCAATCGGGAAGCTTCCCCACTCACTGTTTCCAGGAGCAGGGAACAGCGCCAGAAGTCCCGCCCGCCC GACCGTGACTGACAGCCCCAGAGACTGAAAccgcccccccccgccccccgcAGAGAGATCCGCGTCTGCAAAGAC AAGGGCGGGCGGCCGTGATTTTTATATAAAATaaaaaaagtctcgtgtgcttatcgtgtgggagctcacg	379	3	y	8.1e-08	++++++++++++++
chr12:8640766-8641286	301	GCAGCTTCCAATCGGGAAGCTTCCCCACTCACTGTTTCCAGGAGCAGGGAACAGCGCCAGAAGTCCCGCCCGCCC GACCGTGACTGACAGCCCCAGAGACTGAAAccgcccccccccgccccccgcAGAGAGATCCGCGTCTGCAAAGAC AAGGGCGGGCGGCCGTGATTTTTATATAAAATaaaaaaagtctcgtgtgcttatcgtgtgggagctcacg	413	2	n	3e-06	+++++++++++ +
chr12:8640766-8641286	301	GCAGCTTCCAATCGGGAAGCTTCCCCACTCACTGTTTCCAGGAGCAGGGAACAGCGCCAGAAGTCCCGCCCGCCC GACCGTGACTGACAGCCCCAGAGACTGAAAccgcccccccccgccccccgcAGAGAGATCCGCGTCTGCAAAGAC AAGGGCGGGCGGCCGTGATTTTTATATAAAATaaaaaaagtctcgtgtgcttatcgtgtgggagctcacg	448	2	y	6.7e-05	+ + +++++++
chr4:133479848-133480255	1	TGGAGGGCGCTGTCCCTCTAAGTCCCGGCAGGCTCGGGCCAATCGCAAGCAGCAGCTTCTTTAAAGACCAAAGGA	8	3	n	6.3e-05	++++++ ++ +
chr4:133479848-133480255	1	TGGAGGGCGCTGTCCCTCTAAGTCCCGGCAGGCTCGGGCCAATCGCAAGCAGCAGCTTCTTTAAAGACCAAAGGA	36	1	n	1.8e-05	+++++++++ +++
chr4:133479848-133480255	76	GGGAATTCGGTCCGAGAGAGGGGGCGGGGAAGGGGCGTGCCTTTCAGCCAATCAGAAACTCCTGAGAGCCAGCGA	92	2	y	6.6e-07	++++++++++++
chr4:133479848-133480255	76	GGGAATTCGGTCCGAGAGAGGGGGCGGGGAAGGGGCGTGCCTTTCAGCCAATCAGAAACTCCTGAGAGCCAGCGA	120	1	n	6.2e-08	+++++++++++++
chr4:133479848-133480255	151	TTCCCTTGCAAAACTGTGTTGGCCCGTGATAGGGGGAGGGACAAGAGGAGGGCATCTCCTGCTGTGTGACAGCTG	179	2	y	7.1e-05	++++++ +++++
chr4:133479848-133480255	226	TGCTGACCAATGGGCGTGCGGCCCGCGGCCTATAAGTGTCAGCTGGGCCCGAGCCGCCTGGCTCTAAGATCTGTT	229	1	n	4.9e-05	++++++++ ++ +
chr4:133479848-133480255	301	AGTCCTCCCTGCCGTCGGGGGTGTTCCCTGGGTTTGCCTCGCCGCCGCCGGGTCCCCGCACCCCGCCTTGGCCCG	360	2	n	5.2e-05	++++++++ ++
chr12:84772930-84773450	1	TGTCCCGGACCGAGGGTGGAGCCAGATCAGGCCACTTGTGAGCAGTAACCAGCGAAggcccgcccgcgccccgcc ctgggctccggggccgccTGGCCTGCAGCTCGCCCTTTATCTCCGCCCATCTCTTCCGCTTCCAGGCAGGGCCTA	9	2	y	6.3e-05	+ +++ ++ ++
chr12:84772930-84773450	1	TGTCCCGGACCGAGGGTGGAGCCAGATCAGGCCACTTGTGAGCAGTAACCAGCGAAggcccgcccgcgccccgcc ctgggctccggggccgccTGGCCTGCAGCTCGCCCTTTATCTCCGCCCATCTCTTCCGCTTCCAGGCAGGGCCTA	68	2	n	1.2e-05	+++++++++ +
chr12:84772930-84773450	1	TGTCCCGGACCGAGGGTGGAGCCAGATCAGGCCACTTGTGAGCAGTAACCAGCGAAggcccgcccgcgccccgcc ctgggctccggggccgccTGGCCTGCAGCTCGCCCTTTATCTCCGCCCATCTCTTCCGCTTCCAGGCAGGGCCTA	115	2	n	1.1e-05	+ +++++++++ +
chr12:84772930-84773450	151	CGGAGAACTCGCTCTTTGCGTTCGCCCCGCTCTATTGGTACCGACCCACTTCGGCAAGTGGAAGCGTTCTCTGTC AATCAAAGCCCTCTTATCTCGCTATACCCAATAGGCACGCTTGGGGGCGGAGGCTCGATGCAGCCCCGCCCCCTT CTCCCCTCCTCCGGAAGCCCAGGCTAGGCGGGGATTTGGACCATGCTAGGGGCGGAGCTTGCGGAGTAAGATGGC	219	3	n	3.1e-06	+++++++++++
chr12:84772930-84773450	151	CGGAGAACTCGCTCTTTGCGTTCGCCCCGCTCTATTGGTACCGACCCACTTCGGCAAGTGGAAGCGTTCTCTGTC AATCAAAGCCCTCTTATCTCGCTATACCCAATAGGCACGCTTGGGGGCGGAGGCTCGATGCAGCCCCGCCCCCTT CTCCCCTCCTCCGGAAGCCCAGGCTAGGCGGGGATTTGGACCATGCTAGGGGCGGAGCTTGCGGAGTAAGATGGC	265	2	y	3.5e-05	++++++++ +
chr12:84772930-84773450	151	CGGAGAACTCGCTCTTTGCGTTCGCCCCGCTCTATTGGTACCGACCCACTTCGGCAAGTGGAAGCGTTCTCTGTC AATCAAAGCCCTCTTATCTCGCTATACCCAATAGGCACGCTTGGGGGCGGAGGCTCGATGCAGCCCCGCCCCCTT CTCCCCTCCTCCGGAAGCCCAGGCTAGGCGGGGATTTGGACCATGCTAGGGGCGGAGCTTGCGGAGTAAGATGGC	288	2	n	3.2e-09	++++++++++++ +
chr12:84772930-84773450	151	CGGAGAACTCGCTCTTTGCGTTCGCCCCGCTCTATTGGTACCGACCCACTTCGGCAAGTGGAAGCGTTCTCTGTC AATCAAAGCCCTCTTATCTCGCTATACCCAATAGGCACGCTTGGGGGCGGAGGCTCGATGCAGCCCCGCCCCCTT CTCCCCTCCTCCGGAAGCCCAGGCTAGGCGGGGATTTGGACCATGCTAGGGGCGGAGCTTGCGGAGTAAGATGGC	321	2	y	4.6e-05	++ +++++++++
chr12:84772930-84773450	151	CGGAGAACTCGCTCTTTGCGTTCGCCCCGCTCTATTGGTACCGACCCACTTCGGCAAGTGGAAGCGTTCTCTGTC AATCAAAGCCCTCTTATCTCGCTATACCCAATAGGCACGCTTGGGGGCGGAGGCTCGATGCAGCCCCGCCCCCTT CTCCCCTCCTCCGGAAGCCCAGGCTAGGCGGGGATTTGGACCATGCTAGGGGCGGAGCTTGCGGAGTAAGATGGC	345	2	y	1.8e-06	+ ++++++++ ++
chr12:84772930-84773450	376	GGCCTCCAGGGCCTTGTCCCTAACTGCCGAGGCGGTCAGGGCTGTCATTCCTAGGCGCTCGGGAAGGTATCGAGG	415	3	n	7.7e-05	++++++++ ++
chr11:106036654-106037044	1	ATCCCCTTGACTGACATCTTGGGTAGCCAATGATCTTTGGGACTTCAAAAGAGCCCGCCTCCAGGAGCTGGGCGG GGCTAATGAGCAGAATGACAAACATTTTCACCAATAGTAAGGAGGGCGCGGGCGCTACAACTGTGTCGACCAATG AAAAGAAGGAACAGTTTGGAAAGGACGTACCCGGCAGCCAACGCTCGTCGCCGCTGCGGGGTCGCGTGGCTTCCG	6	3	y	2.2e-06	+++++++++++ ++
chr11:106036654-106037044	1	ATCCCCTTGACTGACATCTTGGGTAGCCAATGATCTTTGGGACTTCAAAAGAGCCCGCCTCCAGGAGCTGGGCGG GGCTAATGAGCAGAATGACAAACATTTTCACCAATAGTAAGGAGGGCGCGGGCGCTACAACTGTGTCGACCAATG AAAAGAAGGAACAGTTTGGAAAGGACGTACCCGGCAGCCAACGCTCGTCGCCGCTGCGGGGTCGCGTGGCTTCCG	24	1	n	9.1e-05	++++++++ +
chr11:106036654-106037044	1	ATCCCCTTGACTGACATCTTGGGTAGCCAATGATCTTTGGGACTTCAAAAGAGCCCGCCTCCAGGAGCTGGGCGG GGCTAATGAGCAGAATGACAAACATTTTCACCAATAGTAAGGAGGGCGCGGGCGCTACAACTGTGTCGACCAATG AAAAGAAGGAACAGTTTGGAAAGGACGTACCCGGCAGCCAACGCTCGTCGCCGCTGCGGGGTCGCGTGGCTTCCG	65	2	y	3.4e-06	+ + ++++++++++
chr11:106036654-106037044	1	ATCCCCTTGACTGACATCTTGGGTAGCCAATGATCTTTGGGACTTCAAAAGAGCCCGCCTCCAGGAGCTGGGCGG GGCTAATGAGCAGAATGACAAACATTTTCACCAATAGTAAGGAGGGCGCGGGCGCTACAACTGTGTCGACCAATG AAAAGAAGGAACAGTTTGGAAAGGACGTACCCGGCAGCCAACGCTCGTCGCCGCTGCGGGGTCGCGTGGCTTCCG	142	1	n	4.2e-06	++++++++ + +++
chr11:106036654-106037044	226	TTCCGAGAGGGCGGGCCGGCATCCCAAACGGAAGGTGGTAGCGCTGCCCGAGCTGGTTTGAAACTGGTGGTCGGG	229	2	y	1.6e-06	+++ +++++++ +
chr11:106036654-106037044	301	CCCGGCCGAGTGTGAGTGTGTGTAGCCGAGGACCCGCTGGAGGGCTAGGCCGTTCTTGACCGCCCCGGCCCCGCC TCCCCTCGGACCCGC	368	2	n	3.4e-07	+++++++++++++
chr17:3557467-3558117	1	TAGCCCGCGAGGACCGGAGGAGCAGCGCTTGACTGACAGCCGCCCGCCCCAACCCGCTCCATCACCCGGCCGCGC	28	3	y	2.6e-08	++++++++++++++
chr17:3557467-3558117	151	CTGTTTCACCGCTCGCAGTCCGAACAACTTAATGATCTCCCGAATGGTGGGCAACGGGGGAAGGCGGAAAGTGCC	207	2	y	2.1e-05	++++ ++++++ +
chr17:3557467-3558117	226	GAGCTTCCCCGAGGCAGCCATGAGAGACCCACATACACAGCCACGCGCAGCGGCTGGAAAGGTGCACGGCGCGCA GGGGGTGGGACCTTGGAGAAGACTGCCCGCCTCTGAGGCCACCTGGTTGGATGGAGAAACCTGCCGGAAATGACG AAACTGACAGGAAGTCTGTATGTACTGGGAGCTCAGGACGCGTCAGGCCGAAAGCGGTGCAGGTTGGGAGAGGAG AGGGGGCGGAGGCTAGGAGGCGTGGTCTTTGTAACCTCTGGGAGGCTCCGCAGGCCTTTGACATTCCAAAGGCTT	298	2	y	3.4e-06	+ ++++++ +++++
chr17:3557467-3558117	226	GAGCTTCCCCGAGGCAGCCATGAGAGACCCACATACACAGCCACGCGCAGCGGCTGGAAAGGTGCACGGCGCGCA GGGGGTGGGACCTTGGAGAAGACTGCCCGCCTCTGAGGCCACCTGGTTGGATGGAGAAACCTGCCGGAAATGACG AAACTGACAGGAAGTCTGTATGTACTGGGAGCTCAGGACGCGTCAGGCCGAAAGCGGTGCAGGTTGGGAGAGGAG AGGGGGCGGAGGCTAGGAGGCGTGGTCTTTGTAACCTCTGGGAGGCTCCGCAGGCCTTTGACATTCCAAAGGCTT	324	2	n	7.5e-05	+++++++++
chr17:3557467-3558117	226	GAGCTTCCCCGAGGCAGCCATGAGAGACCCACATACACAGCCACGCGCAGCGGCTGGAAAGGTGCACGGCGCGCA GGGGGTGGGACCTTGGAGAAGACTGCCCGCCTCTGAGGCCACCTGGTTGGATGGAGAAACCTGCCGGAAATGACG AAACTGACAGGAAGTCTGTATGTACTGGGAGCTCAGGACGCGTCAGGCCGAAAGCGGTGCAGGTTGGGAGAGGAG AGGGGGCGGAGGCTAGGAGGCGTGGTCTTTGTAACCTCTGGGAGGCTCCGCAGGCCTTTGACATTCCAAAGGCTT	374	3	y	0.0001	++ +++++++++
chr17:3557467-3558117	226	GAGCTTCCCCGAGGCAGCCATGAGAGACCCACATACACAGCCACGCGCAGCGGCTGGAAAGGTGCACGGCGCGCA GGGGGTGGGACCTTGGAGAAGACTGCCCGCCTCTGAGGCCACCTGGTTGGATGGAGAAACCTGCCGGAAATGACG AAACTGACAGGAAGTCTGTATGTACTGGGAGCTCAGGACGCGTCAGGCCGAAAGCGGTGCAGGTTGGGAGAGGAG AGGGGGCGGAGGCTAGGAGGCGTGGTCTTTGTAACCTCTGGGAGGCTCCGCAGGCCTTTGACATTCCAAAGGCTT	449	2	y	1.3e-05	++++++++++ +
chr17:3557467-3558117	526	GACTTTTGATTTGTAGCAGGAAAGATGGTGATTGGTTGCTTGCTGTTTGTAGACTGGTTACCGCCCCACCCCCGT AGGCTAGATACTTTTTATTTCTTCGCGTCCATTACTTCtttcagaactta	550	1	y	7.3e-06	+ ++++++++++
chr17:3557467-3558117	526	GACTTTTGATTTGTAGCAGGAAAGATGGTGATTGGTTGCTTGCTGTTTGTAGACTGGTTACCGCCCCACCCCCGT AGGCTAGATACTTTTTATTTCTTCGCGTCCATTACTTCtttcagaactta	588	2	n	2.6e-05	+++++ +++++
chr11:49846509-49846998	76	AGGGGGCGCCACTCTGCACTAGGGCATCCAGAGCGCGCCACTGGCCCCGCCCACACCCAGCCTCCAGCCACGCCC	119	2	n	6.4e-08	+++++++++++ ++
chr11:49846509-49846998	151	GTACTGCCCAGCCTTGCCCACCCCCAGTCTCAATTGGTCCCGCCTGTCTGGATATCCTAGTTCTGATTGGCTGGC	165	2	n	9.9e-05	+++ +++++
chr11:49846509-49846998	151	GTACTGCCCAGCCTTGCCCACCCCCAGTCTCAATTGGTCCCGCCTGTCTGGATATCCTAGTTCTGATTGGCTGGC	187	2	n	4.9e-05	+++++++++ ++
chr11:49846509-49846998	151	GTACTGCCCAGCCTTGCCCACCCCCAGTCTCAATTGGTCCCGCCTGTCTGGATATCCTAGTTCTGATTGGCTGGC	210	1	y	6.2e-08	+++++++++++++
chr11:49846509-49846998	301	GGAAGGGTCGCAGCGCCCCGCGCCCCTCACACCCACTGCGACGGCGAcggggcggagcagagcggggcggggcgA	345	2	y	7.2e-06	++ +++++++ ++
chr11:49846509-49846998	301	GGAAGGGTCGCAGCGCCCCGCGCCCCTCACACCCACTGCGACGGCGAcggggcggagcagagcggggcggggcgA	360	2	y	1.6e-06	+ + ++++++++++
chr3:131303147-131303400	76	AAGGCACGCCCTTCCGATTGGCTGCGCCGCGTGCCCCTCTCGGGATCCTCCAGTCAGCTGCTCCTGCATAAGGTG GGGGCGGGACGTCCTACGGGACGGCTGGTGGTGACGAGTGGTCTCTCGCAGCACAGCTGAGCTGTCCTGAGTGGG	86	1	y	3.7e-07	++++++++++++++
chr3:131303147-131303400	76	AAGGCACGCCCTTCCGATTGGCTGCGCCGCGTGCCCCTCTCGGGATCCTCCAGTCAGCTGCTCCTGCATAAGGTG GGGGCGGGACGTCCTACGGGACGGCTGGTGGTGACGAGTGGTCTCTCGCAGCACAGCTGAGCTGTCCTGAGTGGG	147	2	y	8e-08	++ +++++++++++
chr11:97744755-97745382	1	TTCCGTCCGCCCCAcgccccgccctcgctgcgccggcccgccccgccccgccccgccccgGGGAGCAGGCCAGCC	16	2	n	1e-06	+++++++++ + +
chr11:97744755-97745382	1	TTCCGTCCGCCCCAcgccccgccctcgctgcgccggcccgccccgccccgccccgccccgGGGAGCAGGCCAGCC	40	2	n	9e-07	++++++++++ +++
chr11:97744755-97745382	76	TGATCCTCACCCCGCCCCCGGGCGGCACCGCCCACTGGATCCCGGCTCTCCCCTCCCCGTCGGAATGGTACCGCC	84	2	n	5.3e-06	++++++++++
chr11:97744755-97745382	76	TGATCCTCACCCCGCCCCCGGGCGGCACCGCCCACTGGATCCCGGCTCTCCCCTCCCCGTCGGAATGGTACCGCC	100	2	n	4.3e-05	++ +++++++++
chr11:97744755-97745382	151	CGTCCCCGGGCGCTTGCAGCTGCCCCGCCCACTCCTCCTCTCCCGGCCTGAAGGGAACCCAGCCGGCTTCACGCG	172	2	n	7.9e-09	++++++++++++++
chr11:97744755-97745382	226	GGGGAACGAGGAAGACTGGGGATGGACAGCCTCGAGGCACTCGGCAAGAAGGGCTCCCTACTCGGACACCCTCAA	243	3	y	3.3e-05	+ +++ +++++++
chr11:97744755-97745382	451	AAGTCCTGCCTAGAAAACCAGGGACCGCCCCCTCGCTCCACCCAAGCGTGGATCTTCCCACTCCCCTGGGCCGAC	472	2	n	6.3e-05	+ ++++++++++
chr11:97744755-97745382	526	GGCTCGCTCCACCCGCAAGGTACGCCCCCTTTCCCGGGGGCCAATCAGAGGAGCAGGCCGGGAATCCTAGGTTTT	563	1	n	3.3e-06	+++++++++++++
chr15:81871932-81872629	1	TTACTTCCGTTCCTCCGTGATTGGCCATTAAGCTGTCCGTCAGCCTTTAGCCTCGGGGGGTGGGGGGGGGCACCA	14	1	y	4.2e-05	+ ++++++++++
chr15:81871932-81872629	1	TTACTTCCGTTCCTCCGTGATTGGCCATTAAGCTGTCCGTCAGCCTTTAGCCTCGGGGGGTGGGGGGGGGCACCA	31	3	n	5e-06	+++++++ ++++
chr15:81871932-81872629	1	TTACTTCCGTTCCTCCGTGATTGGCCATTAAGCTGTCCGTCAGCCTTTAGCCTCGGGGGGTGGGGGGGGGCACCA	53	2	y	9.3e-05	++++++ ++++
chr15:81871932-81872629	376	CAGTTTCCCCGCATCTTTGCTTTCCACGCCGGGTTTCCGTCATGTAAGCCCCGCCCACTGTGCTATCTGCACTCT	423	2	n	3.4e-07	++++++++++++
chr15:81871932-81872629	451	TGGCTGCGGGAGGAGGCCCCACCCTCGCGGTTGACTCGTCTCTCTGTAAGCCCCGCCCCCTTCGATGCTTTTTTA	466	2	n	1.2e-05	+++++ +++ + +
chr15:81871932-81872629	451	TGGCTGCGGGAGGAGGCCCCACCCTCGCGGTTGACTCGTCTCTCTGTAAGCCCCGCCCCCTTCGATGCTTTTTTA	500	2	n	3.2e-09	++++++++++++ +
chr15:81871932-81872629	601	GGTCACCCGGCTGCAGGTAAGCGAGCCCAGAGACGTGGGTTTACGGGGGCGGGGAGCCTCCTGCCTTGCCCGCGG CTGTAGGCGAGGCCAGGCGAGG	642	2	y	1.4e-05	++++++++++
chr15:81871932-81872629	601	GGTCACCCGGCTGCAGGTAAGCGAGCCCAGAGACGTGGGTTTACGGGGGCGGGGAGCCTCCTGCCTTGCCCGCGG CTGTAGGCGAGGCCAGGCGAGG	675	2	y	5.6e-05	+ +++++++ +++
chr5:134184405-134184734	1	AAGAGTGGGGGGCGGGGCGGGGAAGACGTGGGGTTAGGCGACTTTCGCACGCCAGGCGCGCACCAAAATCTCGCT TTCGATTGGTTGTGACGGGGCGAGGAGGCGGGGAAAGCTGCGCCCGGTGCGTGCCGAGGTCACGCGCCACCTGAC	5	2	y	4.9e-08	+ ++++++++++++
chr5:134184405-134184734	1	AAGAGTGGGGGGCGGGGCGGGGAAGACGTGGGGTTAGGCGACTTTCGCACGCCAGGCGCGCACCAAAATCTCGCT TTCGATTGGTTGTGACGGGGCGAGGAGGCGGGGAAAGCTGCGCCCGGTGCGTGCCGAGGTCACGCGCCACCTGAC	74	1	y	1.1e-06	+++ ++++++++++
chr5:134184405-134184734	1	AAGAGTGGGGGGCGGGGCGGGGAAGACGTGGGGTTAGGCGACTTTCGCACGCCAGGCGCGCACCAAAATCTCGCT TTCGATTGGTTGTGACGGGGCGAGGAGGCGGGGAAAGCTGCGCCCGGTGCGTGCCGAGGTCACGCGCCACCTGAC	96	2	y	1.6e-06	++++++++++++
chr5:134184405-134184734	151	GTACCTGCGCTGTGTTTAGAAACCCTTGATTGGTTAGGGGAAGGGGCGGGGCCATCGCGGTTGCCTAGCAACGGC	173	1	y	1.2e-05	++ ++++++++++
chr5:134184405-134184734	151	GTACCTGCGCTGTGTTTAGAAACCCTTGATTGGTTAGGGGAAGGGGCGGGGCCATCGCGGTTGCCTAGCAACGGC	189	2	y	4.5e-09	++++++++++++++
chr5:134184405-134184734	226	GCTCTGGCTCCACCTTCGGCGGCTGGCTTTGCTTGTTGGCTCCAGGATTATGGGGGCGTTTGGTGTTTGTGGCAG	232	2	n	6.3e-05	++ ++ +++ + +
chr8:83972634-83973077	1	AGCCGCCGCAGCCTCCGCCCCGCCCGCTGCCCGGGCCGCAGCCTGAGCCGCTGCCCCGCCCTCTCACCCCGGGAC	17	2	n	4.7e-06	+++++++++ ++ +
chr8:83972634-83973077	1	AGCCGCCGCAGCCTCCGCCCCGCCCGCTGCCCGGGCCGCAGCCTGAGCCGCTGCCCCGCCCTCTCACCCCGGGAC	53	2	n	7.6e-07	+++++++++ +++
chr8:83972634-83973077	151	CGGCCAATCACGTGCGTTCGCCCGCCCGACTGCGGCCTCACGAGCCCGTGAGTGGCGGAGAGTCTGCAACTCGCG	151	1	n	9.7e-05	++++++++++ +
chr8:83972634-83973077	226	TCACTCATCCAGGAGCCTATGGTGGCGCGGGAGGGTTCCGGAGGGCCAATGGACAGCGGCGTAGGGCTGTCAGTC AGGGAGGCCTGAACCAATGGGCGGTGGGCTGCGGGGGCGTCACGGACAGAGGACTTGGGCTGAGGCTCCCCCGCG	268	1	n	6.6e-05	+++++++ + ++
chr8:83972634-83973077	226	TCACTCATCCAGGAGCCTATGGTGGCGCGGGAGGGTTCCGGAGGGCCAATGGACAGCGGCGTAGGGCTGTCAGTC AGGGAGGCCTGAACCAATGGGCGGTGGGCTGCGGGGGCGTCACGGACAGAGGACTTGGGCTGAGGCTCCCCCGCG	290	3	n	1.5e-07	++++++++++++ +
chr8:83972634-83973077	226	TCACTCATCCAGGAGCCTATGGTGGCGCGGGAGGGTTCCGGAGGGCCAATGGACAGCGGCGTAGGGCTGTCAGTC AGGGAGGCCTGAACCAATGGGCGGTGGGCTGCGGGGGCGTCACGGACAGAGGACTTGGGCTGAGGCTCCCCCGCG	311	1	n	2.8e-05	+++++++ ++ ++
chr8:83972634-83973077	376	GGCGGGCGCAGAGAGACGCGGGAAGCAGGGGCTGGGCGGGGGTCGTGGcgccgcagccagcgcagcca	404	2	y	2.8e-05	+++ +++++++++
chr5:109556858-109559133	76	GCAACTTCCTGCGTACTTCCGCCCAAGGCCCCGCCCCCTCCCTCCATGTCACGCCCACACCACTCACGCCAGGCG	103	2	n	1.1e-09	++++++++++++++
chr5:109556858-109559133	76	GCAACTTCCTGCGTACTTCCGCCCAAGGCCCCGCCCCCTCCCTCCATGTCACGCCCACACCACTCACGCCAGGCG	123	2	n	4.3e-05	+++ +++++++ ++
chr5:109556858-109559133	151	GACGCGCGCTGCCTAGCCTTAAACACCATGGCCCCGCCTCCGTCGCGCAGTGCCAGCTCCAGCAGCCCCGCCCTC GCCGCGGGGAGGATGCACCCGGAAGTGACACCAGCGCCGGACAGGAAATATCGCGGGCAGGGTTGCAGGGCGCCA	181	2	n	6.6e-07	+++++++++++ +
chr5:109556858-109559133	151	GACGCGCGCTGCCTAGCCTTAAACACCATGGCCCCGCCTCCGTCGCGCAGTGCCAGCTCCAGCAGCCCCGCCCTC GCCGCGGGGAGGATGCACCCGGAAGTGACACCAGCGCCGGACAGGAAATATCGCGGGCAGGGTTGCAGGGCGCCA	215	2	n	2.3e-07	+++++++++ + ++
chr5:109556858-109559133	301	GTGCCATAACTGCAGAGTCGGGGATTAAGGGGGAAGGATCAGCTGGATGGGAAGTGATGGACCAGAAGTCCCGCC CACGAGCATCTGAATTTCAACACCTCAAACAGAAAGTGATGGGCAGAAAGGAAGTACCGCTCCTTCCTGTCATTC ATCAGAGTCTGAAAGGAAGTACCGTCCCTAATCATTTGTCAATCATTAATTAGACAGGAAGTCCCGCCCACTCTT	368	2	n	4.7e-06	+++++++++++
chr5:109556858-109559133	301	GTGCCATAACTGCAGAGTCGGGGATTAAGGGGGAAGGATCAGCTGGATGGGAAGTGATGGACCAGAAGTCCCGCC CACGAGCATCTGAATTTCAACACCTCAAACAGAAAGTGATGGGCAGAAAGGAAGTACCGCTCCTTCCTGTCATTC ATCAGAGTCTGAAAGGAAGTACCGTCCCTAATCATTTGTCAATCATTAATTAGACAGGAAGTCCCGCCCACTCTT	410	3	y	8.3e-05	+++++ + +++
chr5:109556858-109559133	301	GTGCCATAACTGCAGAGTCGGGGATTAAGGGGGAAGGATCAGCTGGATGGGAAGTGATGGACCAGAAGTCCCGCC CACGAGCATCTGAATTTCAACACCTCAAACAGAAAGTGATGGGCAGAAAGGAAGTACCGCTCCTTCCTGTCATTC ATCAGAGTCTGAAAGGAAGTACCGTCCCTAATCATTTGTCAATCATTAATTAGACAGGAAGTCCCGCCCACTCTT	440	3	n	1.6e-05	+++++++ +++
chr5:109556858-109559133	301	GTGCCATAACTGCAGAGTCGGGGATTAAGGGGGAAGGATCAGCTGGATGGGAAGTGATGGACCAGAAGTCCCGCC CACGAGCATCTGAATTTCAACACCTCAAACAGAAAGTGATGGGCAGAAAGGAAGTACCGCTCCTTCCTGTCATTC ATCAGAGTCTGAAAGGAAGTACCGTCCCTAATCATTTGTCAATCATTAATTAGACAGGAAGTCCCGCCCACTCTT	484	3	n	2.4e-05	+ +++++++++
chr5:109556858-109559133	301	GTGCCATAACTGCAGAGTCGGGGATTAAGGGGGAAGGATCAGCTGGATGGGAAGTGATGGACCAGAAGTCCCGCC CACGAGCATCTGAATTTCAACACCTCAAACAGAAAGTGATGGGCAGAAAGGAAGTACCGCTCCTTCCTGTCATTC ATCAGAGTCTGAAAGGAAGTACCGTCCCTAATCATTTGTCAATCATTAATTAGACAGGAAGTCCCGCCCACTCTT	511	2	n	4e-07	+++++++++++++
chr5:109556858-109559133	526	TCAGGCGTTTAAAAGAATGAACAGCAAGTGAGTGAAGAGGAATGAGAGGAAATCCCGCCCCCTCCCATATATCAT	577	2	n	5.6e-07	+++++++++++++
chr5:109556858-109559133	601	TCAATGATTCCGACAGGAAGTCACAGACCAGAAGTTCTGCCCCGCCCCCCTTCACTCACCGGAACTCCAGGCTCA	639	2	n	1.3e-07	++++++++++++
chr5:109556858-109559133	751	CATCACCTGCGGGGGCAGGGCGGGGATCAGGGGAGCAGCCCGTGACGTCAGCGCGTTCCAGAAGAGCCATCGCAG	763	2	y	1.3e-05	+++ ++++++++
chr5:109556858-109559133	1126	CGGTAGGGAAGCGGGGCTCACCACTATGCAAAGCGACCAATGGATACACAAATGAGCAGGCAGTGAACCAGAGTG	1159	1	n	7.5e-05	++++++++ + +
chr5:109556858-109559133	1501	TCCCGATGGATATGCAAATGAGAAGCGATGAGTGAGAACTCGGTAGGGGCGAAGCGTTATTTGCATATAAGCGGG	1542	2	y	4.9e-05	++ +++++++ ++
chr5:109556858-109559133	1651	GTGGCGGCAGCACTATGCTAATGAGGTCAAGGCGGGGTTTAGGTCTCATTTGCATATTACTGAGGAGAAAGCGCC	1675	2	y	3.8e-05	++ ++++++++
chr5:109556858-109559133	1726	GAGCGTAGGGGGGGAGGGCGGGGCTCATGCATACGCAAAGATCAAAATGAATATGCAAACGAAGCGCTATCCGAT	1736	2	y	2.7e-08	++++ +++++++++
chr5:109556858-109559133	1876	TTGGTAGCTCTTGCTCGGGCCCCGCCCACCGCGGCGATTGACAGGCAGCCCCGCCCCCGCTCACTCCTCACCCCG	1894	2	n	9.9e-08	++++++++++++ +
chr5:109556858-109559133	1876	TTGGTAGCTCTTGCTCGGGCCCCGCCCACCGCGGCGATTGACAGGCAGCCCCGCCCCCGCTCACTCCTCACCCCG	1908	3	y	6.2e-06	+ +++++++++++
chr5:109556858-109559133	1876	TTGGTAGCTCTTGCTCGGGCCCCGCCCACCGCGGCGATTGACAGGCAGCCCCGCCCCCGCTCACTCCTCACCCCG	1923	2	n	3.4e-07	+++++++++++ +
chr5:109556858-109559133	2026	GTCGCCGGCGGGGCCGCGGACGCTGCAGTGATTGACAGCTGGTTCGGTCCGAGCCGGTCCGAGTCGAGGGCGCCC	2052	3	y	3.4e-07	+++++++++++++
chr5:109556858-109559133	2101	AGGCCGCTTAGAGCCGAAAACGGGAAGCCGGGGGCGGGGGTTGGGGCGACGGGGCGGGGCCACGGCAATAAACGG	2127	2	y	7.9e-06	+ ++++++++++
chr5:109556858-109559133	2101	AGGCCGCTTAGAGCCGAAAACGGGAAGCCGGGGGCGGGGGTTGGGGCGACGGGGCGGGGCCACGGCAATAAACGG	2147	2	y	1.4e-06	++ ++++++++++
chr5:109556858-109559133	2176	ATGCGGCGACTCACCGACATGGGCGTGGCCCGGCTTCCTCTTCCCATCAATCACCCGGATAgggggaagcggggg gggggcgggggggggggggTGGACT	2191	2	y	6.7e-05	+ +++++++ +++
chr5:109556858-109559133	2176	ATGCGGCGACTCACCGACATGGGCGTGGCCCGGCTTCCTCTTCCCATCAATCACCCGGATAgggggaagcggggg gggggcgggggggggggggTGGACT	2248	2	y	1.4e-06	+++++++++++++
chr5:109556858-109559133	2176	ATGCGGCGACTCACCGACATGGGCGTGGCCCGGCTTCCTCTTCCCATCAATCACCCGGATAgggggaagcggggg gggggcgggggggggggggTGGACT	2262	2	y	7.9e-05	++++++++ ++
chr12:111442385-111442757	1	TAGGTAGCCAATCAGAGACCGTGGTGCGACAACAGCTCTCCGCTAAGCGGAACTCGTGGCTCCCTGTGCACGCAC	5	1	n	9.6e-08	+++++++++++++
chr12:111442385-111442757	76	ATCAAGACCACTCTTTCCAGGCTATTGGGAACAGCAAAGTGACCCCGCCCCTCTCTCTACCGGCCCGGCCCCGCC CCCAACACTGGACTCGCCGGGCCGAGGCGTCCGCCAGCGGATTTTCCGCGGTTGCGGTTGGTGGAGCAGGCAGAG TCTGGGCGGAGCCTGCGACTATTTTAGGAGGGCCCCTCCAGGGTCGGGACTAAGGCGTCCTGTCCTGGACACAGT	117	2	n	1.2e-06	+++++++++++ +
chr12:111442385-111442757	76	ATCAAGACCACTCTTTCCAGGCTATTGGGAACAGCAAAGTGACCCCGCCCCTCTCTCTACCGGCCCGGCCCCGCC CCCAACACTGGACTCGCCGGGCCGAGGCGTCCGCCAGCGGATTTTCCGCGGTTGCGGTTGGTGGAGCAGGCAGAG TCTGGGCGGAGCCTGCGACTATTTTAGGAGGGCCCCTCCAGGGTCGGGACTAAGGCGTCCTGTCCTGGACACAGT	143	2	n	1.3e-07	+++++++++++ +
chr12:111442385-111442757	76	ATCAAGACCACTCTTTCCAGGCTATTGGGAACAGCAAAGTGACCCCGCCCCTCTCTCTACCGGCCCGGCCCCGCC CCCAACACTGGACTCGCCGGGCCGAGGCGTCCGCCAGCGGATTTTCCGCGGTTGCGGTTGGTGGAGCAGGCAGAG TCTGGGCGGAGCCTGCGACTATTTTAGGAGGGCCCCTCCAGGGTCGGGACTAAGGCGTCCTGTCCTGGACACAGT	224	2	y	2.8e-05	+ +++++++ ++
chr14:118136971-118137260	1	TTAGCAGCATGGCTGGGGAGCGCCGGGACCCGCACTGCTGCACGTCCCGCCCACCACGGCCGATGATTGGTTACT	44	2	n	6.6e-07	++++++++++++ +
chr14:118136971-118137260	1	TTAGCAGCATGGCTGGGGAGCGCCGGGACCCGCACTGCTGCACGTCCCGCCCACCACGGCCGATGATTGGTTACT	60	1	y	8.3e-06	++ ++++++++++
chr14:118136971-118137260	76	GTCCCCGGCTCATGGAAGGCGATCCCGCGCCTTATTGGCCGTCAGTCTCCGGCCCCGCCCCCTAAGTCCCGCCCC GCCCTCTGCTGCCGACGTGGGCTGCAGGCCGCAGGCGGTTGCCGGGCGAGCAAACGGAGCGGGCGGCGGGCATGG	112	3	n	2.4e-05	+++ +++++++ +
chr14:118136971-118137260	76	GTCCCCGGCTCATGGAAGGCGATCCCGCGCCTTATTGGCCGTCAGTCTCCGGCCCCGCCCCCTAAGTCCCGCCCC GCCCTCTGCTGCCGACGTGGGCTGCAGGCCGCAGGCGGTTGCCGGGCGAGCAAACGGAGCGGGCGGCGGGCATGG	127	2	n	1e-06	++++++++++++
chr14:118136971-118137260	76	GTCCCCGGCTCATGGAAGGCGATCCCGCGCCTTATTGGCCGTCAGTCTCCGGCCCCGCCCCCTAAGTCCCGCCCC GCCCTCTGCTGCCGACGTGGGCTGCAGGCCGCAGGCGGTTGCCGGGCGAGCAAACGGAGCGGGCGGCGGGCATGG	146	2	n	6.4e-08	+++++++++ ++ +
chr5:105495288-105495484	1	GAGCCTGTGGAGCTGCTGTTGCCTAAACTACCCGCTGGGGGAGTGGGCGTGTCGATGATCAAGCGAAGGCTACGC	40	2	y	9.9e-05	++++++++++ + +
chr5:105495288-105495484	76	CTGAGTGACTTTCTTTAGCGCTTGCATGTCACTCATTTCTTCCTccccgccccgcccccccccccTTTGACATGA	99	3	n	1.2e-05	++ +++++ +++
chr5:105495288-105495484	76	CTGAGTGACTTTCTTTAGCGCTTGCATGTCACTCATTTCTTCCTccccgccccgcccccccccccTTTGACATGA	124	2	n	1.9e-09	++++++++++++++
chr4:132510420-132510775	76	CGCTGCGGTCCCTGGGGGAGGGCGGGGACACAAAAGTCCCACGGCGCAGCCAATCAGATGCCTGTTTCTCGGGGA GGCGGAGCCGACACCTCCCTCCGGAGCCAACCTTCCGTCCAATCAGCATCGACAAGCGCCTGGGAACTCTGGGAG	90	2	y	7.6e-07	++++ ++++++++
chr4:132510420-132510775	76	CGCTGCGGTCCCTGGGGGAGGGCGGGGACACAAAAGTCCCACGGCGCAGCCAATCAGATGCCTGTTTCTCGGGGA GGCGGAGCCGACACCTCCCTCCGGAGCCAACCTTCCGTCCAATCAGCATCGACAAGCGCCTGGGAACTCTGGGAG	122	1	n	1.7e-06	++++++++++++ +
chr4:132510420-132510775	76	CGCTGCGGTCCCTGGGGGAGGGCGGGGACACAAAAGTCCCACGGCGCAGCCAATCAGATGCCTGTTTCTCGGGGA GGCGGAGCCGACACCTCCCTCCGGAGCCAACCTTCCGTCCAATCAGCATCGACAAGCGCCTGGGAACTCTGGGAG	145	2	y	1.8e-06	++++++++++ ++
chr4:132510420-132510775	76	CGCTGCGGTCCCTGGGGGAGGGCGGGGACACAAAAGTCCCACGGCGCAGCCAATCAGATGCCTGTTTCTCGGGGA GGCGGAGCCGACACCTCCCTCCGGAGCCAACCTTCCGTCCAATCAGCATCGACAAGCGCCTGGGAACTCTGGGAG	186	1	n	3.3e-05	++ ++++++++ +
chr4:132510420-132510775	226	CTGTAGTTGGCCTCGCACAGATGCTGCAAACTTTTGCATGAAGGCGTTAGTCAGGTCTCTGGCAATACCAGATGA GAGTGACAGCCCAAGGAGTCATTAGGGCTGCGTGATGAAACGGGACTTCACGGGG	298	3	y	5.6e-06	+ ++ ++++++++
chr7:41632941-41633716	76	CCCTCAGAGGCAAAGCAGAACACTGAGCACCGCCTGCAGGGAAGACCCGCCTCCTATCCGTGCTTTCTGAGGGAA	119	2	n	1.9e-05	+ ++++++++++
chr7:41632941-41633716	151	CTGCATGTCCCGATGCTTTGATTGGCTAAAGAGGCGTGAGTGACAGACGTTCCCTTTGATGGAAAGGAGAGCTAA	165	1	y	3.7e-07	++ ++++++++++
chr7:41632941-41633716	151	CTGCATGTCCCGATGCTTTGATTGGCTAAAGAGGCGTGAGTGACAGACGTTCCCTTTGATGGAAAGGAGAGCTAA	185	3	y	1.2e-06	+++++ ++++++ +
chr7:41632941-41633716	526	GCTTAAGGATGCTATCACTCAAACATTGCTAGCCAATCAGAGCTTCCAAGTAGGCAGTCCAATCGAGTGCCAGCG GGAGGCGGGATTTCTTGGCCGCCATGCCACCTTCCAAGCTCTAAGACTGAGGTAGTCGCGTTGGAGACGTTGCTC	555	1	n	9.6e-08	+++++++++++++
chr7:41632941-41633716	526	GCTTAAGGATGCTATCACTCAAACATTGCTAGCCAATCAGAGCTTCCAAGTAGGCAGTCCAATCGAGTGCCAGCG GGAGGCGGGATTTCTTGGCCGCCATGCCACCTTCCAAGCTCTAAGACTGAGGTAGTCGCGTTGGAGACGTTGCTC	598	2	y	5.9e-06	+ +++++++++++
chr7:78895768-78896100	1	TAACCTCCTAAACGCTGCCCTATCCCGGCGCAGGCCACGCCCTCTTCCTTCGGTAGCCCCACCCCTTCCAGTTGG	34	2	n	2.3e-05	+++ +++++ ++ +
chr7:78895768-78896100	1	TAACCTCCTAAACGCTGCCCTATCCCGGCGCAGGCCACGCCCTCTTCCTTCGGTAGCCCCACCCCTTCCAGTTGG	56	2	n	1.2e-06	+++++ ++++++++
chr7:78895768-78896100	76	CACACTTACTGAGGAGGAGCAGGATCAACCAATCAGAAGAGTCCTTAGGCGGGCGCTACGCCCCAGAGAACCAAT AGACAGGTAGCCGAAGCCGGGCTTGTCCGGGCAAGGAGCTTCCGCACCCGGCAAGGGTTCCACGTGAAACCTGGG	101	1	n	1.7e-08	++++++++++++++
chr7:78895768-78896100	76	CACACTTACTGAGGAGGAGCAGGATCAACCAATCAGAAGAGTCCTTAGGCGGGCGCTACGCCCCAGAGAACCAAT AGACAGGTAGCCGAAGCCGGGCTTGTCCGGGCAAGGAGCTTCCGCACCCGGCAAGGGTTCCACGTGAAACCTGGG	143	1	n	3.6e-05	+++++++ + ++
chr11:96916459-96916886	1	GAGCCTCAGTTCCGAAACAAACCGGCCTCCTTCAGCCACGTCGCCGTCTTCAGCGGAGCCAATCCAAGACCACGC TCCGCCCCTCTGCTGAAAGCCCCGCCCATCACGATGTTCTGATTGGTTGAGTACCGGAGGGGCGGGAGAATAGCT	56	1	n	8.6e-05	++++++++ ++
chr11:96916459-96916886	1	GAGCCTCAGTTCCGAAACAAACCGGCCTCCTTCAGCCACGTCGCCGTCTTCAGCGGAGCCAATCCAAGACCACGC TCCGCCCCTCTGCTGAAAGCCCCGCCCATCACGATGTTCTGATTGGTTGAGTACCGGAGGGGCGGGAGAATAGCT	74	2	n	1.8e-06	++ +++++++++
chr11:96916459-96916886	1	GAGCCTCAGTTCCGAAACAAACCGGCCTCCTTCAGCCACGTCGCCGTCTTCAGCGGAGCCAATCCAAGACCACGC TCCGCCCCTCTGCTGAAAGCCCCGCCCATCACGATGTTCTGATTGGTTGAGTACCGGAGGGGCGGGAGAATAGCT	94	2	n	4.8e-07	++++++++++++ +
chr11:96916459-96916886	1	GAGCCTCAGTTCCGAAACAAACCGGCCTCCTTCAGCCACGTCGCCGTCTTCAGCGGAGCCAATCCAAGACCACGC TCCGCCCCTCTGCTGAAAGCCCCGCCCATCACGATGTTCTGATTGGTTGAGTACCGGAGGGGCGGGAGAATAGCT	111	1	y	6.2e-08	+++++++++++++
chr11:96916459-96916886	1	GAGCCTCAGTTCCGAAACAAACCGGCCTCCTTCAGCCACGTCGCCGTCTTCAGCGGAGCCAATCCAAGACCACGC TCCGCCCCTCTGCTGAAAGCCCCGCCCATCACGATGTTCTGATTGGTTGAGTACCGGAGGGGCGGGAGAATAGCT	130	2	y	1.1e-05	++++++++++++
chr11:96916459-96916886	151	GACAGCCAATGGAAGGCGAGAGGCGGGCTCCGGCCGGGTGATCTCCAGGAAGGGATGTTACACTTGCACGATGGC	153	1	n	6.5e-06	++++++++ + +++
chr2:162931147-162932123	1	GAGCTACCCGCTGAAGGGAAAGAGCAACCTCTTTTTTTTTAGTAGACCAATCAGAGACCAAGATGGCCTAGACTG ACAGCCCGGACAACCAATGAGAAATAAAACTCGTTCTCCGCGTGCCTGGGCACAAGAACAGTTTATTAGGCACGA	44	1	n	4.8e-06	++++++++++++
chr2:162931147-162932123	1	GAGCTACCCGCTGAAGGGAAAGAGCAACCTCTTTTTTTTTAGTAGACCAATCAGAGACCAAGATGGCCTAGACTG ACAGCCCGGACAACCAATGAGAAATAAAACTCGTTCTCCGCGTGCCTGGGCACAAGAACAGTTTATTAGGCACGA	68	3	y	1.2e-06	++ +++++++++++
chr2:162931147-162932123	1	GAGCTACCCGCTGAAGGGAAAGAGCAACCTCTTTTTTTTTAGTAGACCAATCAGAGACCAAGATGGCCTAGACTG ACAGCCCGGACAACCAATGAGAAATAAAACTCGTTCTCCGCGTGCCTGGGCACAAGAACAGTTTATTAGGCACGA	86	1	n	5.3e-07	++++++++ ++++
chr2:162931147-162932123	301	CTGCGCGACGACGTCAcgcgctgcgccgcgccgcgccccgccCCCGGGCACTTATAGCGTAGGCCGGCGCGCGCG	335	2	n	5.6e-07	+++++++++++
chr2:162931147-162932123	826	TCGCGCTCCGCCCCTCCGCAGGTACGGTTTCGTGGAGTTCGAGGACTCCCGGGATGCCGACGATGCCGTGTACGA	830	2	n	1e-06	++ ++++++++++
chr5:120588549-120589124	76	ccacagcggcagctgcgccagccttcgcatccgccgACTCCTGTCACTCAGCCCCGAAAGCCCCGCCCACGGCCC	114	3	n	2.4e-06	+++++++ +++
chr5:120588549-120589124	76	ccacagcggcagctgcgccagccttcgcatccgccgACTCCTGTCACTCAGCCCCGAAAGCCCCGCCCACGGCCC	135	2	n	5.6e-07	+++++++++++ +
chr5:120588549-120589124	151	TAGGCCACAGCCTACTGGCCATCAGAGGGGTCGCAATGAAATTTGACAGGGTAGACTACACGTCACTCAGCGTTC	208	3	n	5.9e-05	++ ++++ +++
chr5:120588549-120589124	226	TCACAGCCCTCCTCCCAAAGGGAGGGCGGGGCGAGGAAGCAACACCCCTTTCCTCCCCACCCCACCCCCACCCCC	244	2	y	2.3e-07	+++ +++++++++
chr5:120588549-120589124	226	TCACAGCCCTCCTCCCAAAGGGAGGGCGGGGCGAGGAAGCAACACCCCTTTCCTCCCCACCCCACCCCCACCCCC	284	2	n	1.1e-05	++++ +++++ ++
chr5:120588549-120589124	301	GCCTCACTCGCGCAACCAACAGGAATCCTGCGTCTTTCCATTGGCGAAACGTCAGAGAGGCGGGGATTTTGATTG GCCATCTTTCAGGAGGCGGAGCCAACGCAACCCGATTCGAAGTTAAATGGTGAAAAAGAATGTCAGTCAAACTCA	334	1	y	6.6e-05	+++ + ++++++ +
chr5:120588549-120589124	301	GCCTCACTCGCGCAACCAACAGGAATCCTGCGTCTTTCCATTGGCGAAACGTCAGAGAGGCGGGGATTTTGATTG GCCATCTTTCAGGAGGCGGAGCCAACGCAACCCGATTCGAAGTTAAATGGTGAAAAAGAATGTCAGTCAAACTCA	366	1	y	3.3e-06	++ ++++++++++
chr5:120588549-120589124	301	GCCTCACTCGCGCAACCAACAGGAATCCTGCGTCTTTCCATTGGCGAAACGTCAGAGAGGCGGGGATTTTGATTG GCCATCTTTCAGGAGGCGGAGCCAACGCAACCCGATTCGAAGTTAAATGGTGAAAAAGAATGTCAGTCAAACTCA	384	2	y	1.1e-05	+++++++++ ++
chr5:120588549-120589124	301	GCCTCACTCGCGCAACCAACAGGAATCCTGCGTCTTTCCATTGGCGAAACGTCAGAGAGGCGGGGATTTTGATTG GCCATCTTTCAGGAGGCGGAGCCAACGCAACCCGATTCGAAGTTAAATGGTGAAAAAGAATGTCAGTCAAACTCA	433	3	n	1.5e-05	+ ++++++++++
chr5:120588549-120589124	451	AAGTCCCGCCTTCTAAGAGTGGCTCGTAACCTAGCAACATAAGGGCCGCCGAGTTGCTTAACTGTGGGCCAAGAA	453	2	n	1.4e-05	+++++++++ ++
chr5:120588549-120589124	526	ACTTGCATCTTGAGGAGCTGGTGAGTGACAGCGGGGAAGCCCCAGGCTGC	545	3	y	4e-06	++++ +++++++
chr2:18392542-18393012	1	TGCGCCGGCAGAGAGCGGAGACGTGGCGGGTGGCGCGGGCGGTGCGGACGGCGCCTGTCAGTCAGGAGCGCGGGC	53	3	n	1.5e-07	++++++++++++ +
chr2:18392542-18393012	301	TCTCCTAGCAACTGTGGGGCGGGGGCGGGGCCGGAAGTAGGAACGCCAGGCGCTCTGGATTCTGGCCTCAGAGAA	318	2	y	4.9e-08	++ +++++++++++
chr14:55015115-55015604	76	GTGGAAAGACTGTCTCTGCGGCATCTGGGAGCCAATGAGCTCTCGGGCTGCATAACTAATTTCTTTTTTCTACTG	104	1	n	4.6e-05	+++++++ ++
chr14:55015115-55015604	151	GTTGCACTAGCTGTCAATCAATAATCTGCACAATATTTATTGGAATTAGCATCCATCATTCTCTGTAAATCACGA	159	3	n	2e-07	+++++++++++++
chr14:55015115-55015604	226	ATCACATGCTTCTGTCCCCGCCCACCTTTACGCCTTAAGAACGCCTCTGCGTTTGACACATTCAGGGAGTTTCTT	240	2	n	3.8e-06	+++++++++++
chr14:55015115-55015604	301	TATTTCATTGGCTAGGTGAGGTCCCGCCTCTCCGATTAGCGGAAATGAAAGATCTCTTACTTCCATTGGCTGAAA	301	1	y	1.2e-05	+ + ++++++++
chr14:55015115-55015604	301	TATTTCATTGGCTAGGTGAGGTCCCGCCTCTCCGATTAGCGGAAATGAAAGATCTCTTACTTCCATTGGCTGAAA	321	2	n	1.4e-06	+++++++++++++
chr14:55015115-55015604	301	TATTTCATTGGCTAGGTGAGGTCCCGCCTCTCCGATTAGCGGAAATGAAAGATCTCTTACTTCCATTGGCTGAAA	359	1	y	1.4e-05	++ + ++++++++
chr14:55015115-55015604	376	TTTGCAAACTGTGATTGTCTATCAAAACTATGAACTCACGCTAGCTCCTAGGAAGTTCGGGCCCGGAAAGGGTGG GCTTTGCGAAGATGGCGGCTCCGGTGAGTTCTGTCTCCT	388	3	n	8.3e-05	+ ++++ +++++
chr14:55015115-55015604	376	TTTGCAAACTGTGATTGTCTATCAAAACTATGAACTCACGCTAGCTCCTAGGAAGTTCGGGCCCGGAAAGGGTGG GCTTTGCGAAGATGGCGGCTCCGGTGAGTTCTGTCTCCT	440	2	y	5.9e-05	++++ +++ +++
chr16:31081306-31081631	1	CACGCAGCTCCGCCTCGGAGGAGGCCCATGCGCCGGAGCCGGCGGCCCAGCAGCCGGGCCCACTCAGAGCAGCAC	7	2	n	7.1e-05	++ +++++++
chr16:31081306-31081631	76	TCTAGGGCCCCAAGCCCCGCAGCCGGCGGCGGCCATGGAGGGGGCGGGGCCGCGCTGCCCGGAGCCAATCACGAG	112	2	y	1.1e-09	++++++++++++++
chr16:31081306-31081631	76	TCTAGGGCCCCAAGCCCCGCAGCCGGCGGCGGCCATGGAGGGGGCGGGGCCGCGCTGCCCGGAGCCAATCACGAG	137	1	n	2.8e-05	+++++++++ ++
chr16:31081306-31081631	151	CGTGGATACCTAAAAGGCGGGGCCAGAGCAGGCTTCGCAGCCGCCAGGTCCTAAATTCCGAGGGATTAGACCGCA	160	2	y	3e-06	++ +++++++++
chr4:151861761-151862673	1	TGGCCCCGCCCCGCGGCCCACGCACAGCGCCCACTGGTTGGTGCGTCTGCCAGTCACGGCTCCCGCGACCAATCG GACCGCACCAGGGGTCTCACTACTCTCCGGGAGGAGCGTCCTATCCACCCTGTCCATTGGCTGATCACCACCGCA	3	2	n	4.2e-06	++++++++++ +
chr4:151861761-151862673	1	TGGCCCCGCCCCGCGGCCCACGCACAGCGCCCACTGGTTGGTGCGTCTGCCAGTCACGGCTCCCGCGACCAATCG GACCGCACCAGGGGTCTCACTACTCTCCGGGAGGAGCGTCCTATCCACCCTGTCCATTGGCTGATCACCACCGCA	45	3	n	8.4e-06	+ +++ ++++++++
chr4:151861761-151862673	1	TGGCCCCGCCCCGCGGCCCACGCACAGCGCCCACTGGTTGGTGCGTCTGCCAGTCACGGCTCCCGCGACCAATCG GACCGCACCAGGGGTCTCACTACTCTCCGGGAGGAGCGTCCTATCCACCCTGTCCATTGGCTGATCACCACCGCA	66	1	n	5.7e-05	++++++++++++
chr4:151861761-151862673	1	TGGCCCCGCCCCGCGGCCCACGCACAGCGCCCACTGGTTGGTGCGTCTGCCAGTCACGGCTCCCGCGACCAATCG GACCGCACCAGGGGTCTCACTACTCTCCGGGAGGAGCGTCCTATCCACCCTGTCCATTGGCTGATCACCACCGCA	125	1	y	1.6e-05	++ + ++++++++
chr4:151861761-151862673	151	CCGACTAAAGTGATTGGCCTGGAATCAACGCCCCCTCCCCACCCACTCCCGGGAAAACCCGCCCTCCAGACCTAA	186	2	n	8.8e-06	++++ ++++++++
chr4:151861761-151862673	151	CCGACTAAAGTGATTGGCCTGGAATCAACGCCCCCTCCCCACCCACTCCCGGGAAAACCCGCCCTCCAGACCTAA	206	2	n	5.6e-05	+++++++ ++
chr4:151861761-151862673	301	GCCGAGACGTGGTGTTTTGATTGGACGTCACTACAGTGTTTCCCAAGCCGTCCAGACCAATCAAAGGGGGTTCCC	314	1	y	1.2e-05	++ +++++++ ++
chr4:151861761-151862673	301	GCCGAGACGTGGTGTTTTGATTGGACGTCACTACAGTGTTTCCCAAGCCGTCCAGACCAATCAAAGGGGGTTCCC	354	1	n	7.3e-06	+++++++++ +++
chr4:151861761-151862673	376	GGAACTCGGGAACGGCTGTGGGAAGCCCCGCCCCCCAGCGTGACCGTCATGAGGAAGGCGCTCGCTCATTGGTGT	400	2	n	1.9e-07	++++++++++++
chr4:151861761-151862673	676	CCCGACACGGGGGAGGGGCGCACCTCCCGGCAGACCACGCCCCTCGGCCAAATCCCGCCCCTTCCTGGCCTCAGC CCCGCCCCCTCGGCCGGCGCAGCGTCCCCGCGGCCACCCTACGCTCCCGCCTGCCTTGCGCTCCTCTGTCCCCTT	681	2	y	5.9e-05	+++++ +++++
chr4:151861761-151862673	676	CCCGACACGGGGGAGGGGCGCACCTCCCGGCAGACCACGCCCCTCGGCCAAATCCCGCCCCTTCCTGGCCTCAGC CCCGCCCCCTCGGCCGGCGCAGCGTCCCCGCGGCCACCCTACGCTCCCGCCTGCCTTGCGCTCCTCTGTCCCCTT	727	2	n	1.2e-06	+++++++++++++
chr4:151861761-151862673	676	CCCGACACGGGGGAGGGGCGCACCTCCCGGCAGACCACGCCCCTCGGCCAAATCCCGCCCCTTCCTGGCCTCAGC CCCGCCCCCTCGGCCGGCGCAGCGTCCCCGCGGCCACCCTACGCTCCCGCCTGCCTTGCGCTCCTCTGTCCCCTT	749	2	n	7.9e-09	+++++++++++++
chr4:11966319-11966840	76	cggcgcgctgcagctcggcccaggccagcccactccgcgcccctgcctcgcccggcctccaccctgccccgcccc CACAGGCGCTCTTGAGCTCTTCGCCTTCTGATTGGCTGCGCAATGGCGGGTGGGCGGGACCCGGAGGGCCAGAGG GGCGGGGGGCGGAAGAGGGCGCGCTCCCCGCCAGTTTTGTGACGTCACGGAGGTCAGACAATCCCTTCCATTTGG	141	2	n	7.6e-07	+++++++++++ +
chr4:11966319-11966840	76	cggcgcgctgcagctcggcccaggccagcccactccgcgcccctgcctcgcccggcctccaccctgccccgcccc CACAGGCGCTCTTGAGCTCTTCGCCTTCTGATTGGCTGCGCAATGGCGGGTGGGCGGGACCCGGAGGGCCAGAGG GGCGGGGGGCGGAAGAGGGCGCGCTCCCCGCCAGTTTTGTGACGTCACGGAGGTCAGACAATCCCTTCCATTTGG	175	1	y	1.7e-08	++++++++++++++
chr4:11966319-11966840	76	cggcgcgctgcagctcggcccaggccagcccactccgcgcccctgcctcgcccggcctccaccctgccccgcccc CACAGGCGCTCTTGAGCTCTTCGCCTTCTGATTGGCTGCGCAATGGCGGGTGGGCGGGACCCGGAGGGCCAGAGG GGCGGGGGGCGGAAGAGGGCGCGCTCCCCGCCAGTTTTGTGACGTCACGGAGGTCAGACAATCCCTTCCATTTGG	197	2	y	4e-07	+++++++++++++
chr4:11966319-11966840	76	cggcgcgctgcagctcggcccaggccagcccactccgcgcccctgcctcgcccggcctccaccctgccccgcccc CACAGGCGCTCTTGAGCTCTTCGCCTTCTGATTGGCTGCGCAATGGCGGGTGGGCGGGACCCGGAGGGCCAGAGG GGCGGGGGGCGGAAGAGGGCGCGCTCCCCGCCAGTTTTGTGACGTCACGGAGGTCAGACAATCCCTTCCATTTGG	220	2	y	7.9e-06	+++++++++++
chr4:11966319-11966840	301	CGCGGCTAGCCTATTGGTTCCACGCGTGCGCGCGCCCCGTGACCACGCCCTGTTGCTGGTGAAGGTGGGTTTGCG	307	1	y	9.1e-05	++ +++++++
chr4:11966319-11966840	376	CGTGCCGCGAGGTGGACAGCCTTGGTTGGGTTGCGTTTGGACTCCCAGATGGGGAAGCGCCTGGGCGGGATCCAG	433	2	y	6.3e-05	+ +++++++++
chr11:69059498-69059883	1	GGCGCTCCGGGGCTCGGGTCTTTTAAGACCCGCCCCCTCAACTTTCCGAAGGGGCGGGGCCCCGCGCACAGCTGT	27	2	n	9.6e-06	+ +++++++++++
chr11:69059498-69059883	1	GGCGCTCCGGGGCTCGGGTCTTTTAAGACCCGCCCCCTCAACTTTCCGAAGGGGCGGGGCCCCGCGCACAGCTGT	47	2	y	3.5e-08	+++++++++++++
chr11:69059498-69059883	151	TGGGGTGGCGACCAATCACAGAGCTCTTCCTGTCCGGACCATTATCATCCGGCTGCCAATCGGCGCGCCTCCGCC	159	1	n	4.2e-06	++++++++++ ++
chr11:69059498-69059883	151	TGGGGTGGCGACCAATCACAGAGCTCTTCCTGTCCGGACCATTATCATCCGGCTGCCAATCGGCGCGCCTCCGCC	201	3	n	4.8e-05	+++++ +++++
chr11:69059498-69059883	226	AACGCCCCTTAAAGGCGCCGCCGCTGACCGGGGAGCCCGGCGGACGACTCGCGGTTCCGGCCCCCACCCTCAGTA	286	2	n	9.9e-05	++++ +++ +
chr6:83831655-83832150	76	CGGCCTCACACGCGCGTCTCGCCCCGCCCCCCAGCGCCATTCATTGGCTGCCGGACAACGCCCCGTCCATCTATT	96	2	n	1.9e-07	++++++++++++
chr6:83831655-83832150	76	CGGCCTCACACGCGCGTCTCGCCCCGCCCCCCAGCGCCATTCATTGGCTGCCGGACAACGCCCCGTCCATCTATT	112	1	y	1.9e-05	++ + ++++++++
chr6:83831655-83832150	151	GGACAGCAGAGAATGCCGCTCACTTACCTGGTTTTGATTGGTCTAAATGTGAAACAATGCCCGCCCAGCTCTTTC	181	1	y	6.5e-06	++ +++++++++
chr6:83831655-83832150	151	GGACAGCAGAGAATGCCGCTCACTTACCTGGTTTTGATTGGTCTAAATGTGAAACAATGCCCGCCCAGCTCTTTC	208	2	n	5.9e-05	++++++++ + +
chr6:83831655-83832150	226	AGAAGTTCCAGTTTTTGATTGGTCTTAGCGTCTGTCCATTCGCTCCGCCCTCGATGGAGACTCCCAGCTCTGATT GGCTGAAGAAGCATTGGTCACGCCTAGATTTCCAGGCCAAGGATGAATCACCTCCATGTTGGGGAGGAGCCAGAG	237	1	y	6.5e-06	++ +++++++++
chr6:83831655-83832150	226	AGAAGTTCCAGTTTTTGATTGGTCTTAGCGTCTGTCCATTCGCTCCGCCCTCGATGGAGACTCCCAGCTCTGATT GGCTGAAGAAGCATTGGTCACGCCTAGATTTCCAGGCCAAGGATGAATCACCTCCATGTTGGGGAGGAGCCAGAG	267	2	n	1.4e-05	++ ++++++ +
chr6:83831655-83832150	226	AGAAGTTCCAGTTTTTGATTGGTCTTAGCGTCTGTCCATTCGCTCCGCCCTCGATGGAGACTCCCAGCTCTGATT GGCTGAAGAAGCATTGGTCACGCCTAGATTTCCAGGCCAAGGATGAATCACCTCCATGTTGGGGAGGAGCCAGAG	292	1	y	1.2e-07	+++++++++++++
chr6:83831655-83832150	376	TGCAAGGACTCCGGGTTTGTTTACAAAGGCTTCTGCTCCCGCTTCATCCATTGGCTAAGCTGGAAGCCTGTGTCA	419	1	y	4.6e-05	+ + ++++++++
chr14:14702779-14703249	1	GAAACTGACCTGGGGGGCGGGGGAGGCGACAGACCCTTCCGAGCTGCTGATTGGCTGATACGAATGTCTGTCTTC	10	2	y	7.9e-06	+++++++++++
chr14:14702779-14703249	1	GAAACTGACCTGGGGGGCGGGGGAGGCGACAGACCCTTCCGAGCTGCTGATTGGCTGATACGAATGTCTGTCTTC	44	1	y	6.6e-07	++ +++++++++++
chr14:14702779-14703249	76	TTTTGTCTCCGCCCTACCTCCAAGCCCCTTAGCCACTGGAGGCGGTCGCTCGACGCCGGACCTGGTGCCTAACAG	81	2	n	5.2e-05	+ ++++++ ++
chr14:14702779-14703249	151	GCAGGGGGCGTGCTCCGGGGGGGGCGTGCCGGAGCGCGccccgcccccgcccccgcccccgccccccagccccgc cccccgccccgcccccgcccGGGCGCCGCTGCCTCCTCCGCGCCGCGTCCTCTGCCCGTCTCAGTCCTCGCGGCA	167	2	y	4.6e-05	++++++++++ + +
chr14:14702779-14703249	151	GCAGGGGGCGTGCTCCGGGGGGGGCGTGCCGGAGCGCGccccgcccccgcccccgcccccgccccccagccccgc cccccgccccgcccccgcccGGGCGCCGCTGCCTCCTCCGCGCCGCGTCCTCTGCCCGTCTCAGTCCTCGCGGCA	188	2	n	4.9e-08	+++++++++++ ++
chr14:14702779-14703249	151	GCAGGGGGCGTGCTCCGGGGGGGGCGTGCCGGAGCGCGccccgcccccgcccccgcccccgccccccagccccgc cccccgccccgcccccgcccGGGCGCCGCTGCCTCCTCCGCGCCGCGTCCTCTGCCCGTCTCAGTCCTCGCGGCA	219	2	n	2.2e-08	++++++++++++ +
chr14:14702779-14703249	376	CCAGCGCTCCGCACAGGGTCTCCCTCCGCGTGCCCGTCTCTGCTGCGGTCGCGGCCTCTCAGAGCTCCGGGGCGG GCCATGGAGGCAGACGGGGC	440	2	y	5.2e-05	++++++++ +
chr2:30981899-30982470	1	AGTCCAGGGAACCTCTCTCTTCCGGCGCGCAGAAGTGTCGTCAGAGCGTCGGCTGCACTCAGACCCGCCTCCGCC	62	2	n	1.2e-05	+ +++++++++ ++
chr2:30981899-30982470	76	TTGCCAGGCCACACCCCAAGCCCGTAGGGCCCCGCCTCAGCAGGGCAGGCAACCACTCCGAACTCCGAAAAGCAA	104	2	n	2.8e-05	++++++++++ +
chr2:30981899-30982470	301	GCACGGCCACGCCTCCGGCGTGCCCGGTACCGCCCTCTAGTAGGCTGTGACCTGTGACACCGCCCCCGCTCCTGG	306	2	n	6.7e-05	+++ +++++++ +
chr2:30981899-30982470	301	GCACGGCCACGCCTCCGGCGTGCCCGGTACCGCCCTCTAGTAGGCTGTGACCTGTGACACCGCCCCCGCTCCTGG	327	2	n	8.4e-05	++ ++++++ ++
chr2:30981899-30982470	376	CATAGGCTCTCCCGATTGGACGTCTGACGGTGAGGAGGCGGGGCGTGGCAGGCAGAGCCACAAGACTCTAGGCAG	384	1	y	9.1e-05	++ ++++++++ ++
chr2:30981899-30982470	376	CATAGGCTCTCCCGATTGGACGTCTGACGGTGAGGAGGCGGGGCGTGGCAGGCAGAGCCACAAGACTCTAGGCAG	406	2	y	1e-06	+++++++++++++
chr2:30981899-30982470	451	CGCCGCGGTGGGCTAGCTTGACTGACAGGCGGCGCGGTTGCGACGGCAGGTGAGTTTCTGACGGCTGCTGCCTGC	467	3	y	2.6e-08	++++++++++++++
chr2:144011191-144011688	76	ACCCGGACCAGCCATTCATCGAGCTGCCTCTTCCTATTGGTTCACTAGCCGCCACTCTGCCGGCCTCTGACCAAT CAGACCGCGGACGGCCGCGCCGCGGTGGCGACCATTGGCCAAAAAGGAGGGTCTACGTCTCAGCCAATGAGAGAG	105	1	y	7.3e-06	+++++ +++++++
chr2:144011191-144011688	76	ACCCGGACCAGCCATTCATCGAGCTGCCTCTTCCTATTGGTTCACTAGCCGCCACTCTGCCGGCCTCTGACCAAT CAGACCGCGGACGGCCGCGCCGCGGTGGCGACCATTGGCCAAAAAGGAGGGTCTACGTCTCAGCCAATGAGAGAG	143	1	n	2.6e-05	++++++++++++
chr2:144011191-144011688	76	ACCCGGACCAGCCATTCATCGAGCTGCCTCTTCCTATTGGTTCACTAGCCGCCACTCTGCCGGCCTCTGACCAAT CAGACCGCGGACGGCCGCGCCGCGGTGGCGACCATTGGCCAAAAAGGAGGGTCTACGTCTCAGCCAATGAGAGAG	178	1	y	9.1e-05	+ + ++++++++
chr2:144011191-144011688	76	ACCCGGACCAGCCATTCATCGAGCTGCCTCTTCCTATTGGTTCACTAGCCGCCACTCTGCCGGCCTCTGACCAAT CAGACCGCGGACGGCCGCGCCGCGGTGGCGACCATTGGCCAAAAAGGAGGGTCTACGTCTCAGCCAATGAGAGAG	211	1	n	9.3e-07	++++++++ ++++
chr2:144011191-144011688	226	AGGAGGAGCTGCGGGGAGCCGCGGGGGGCGGGGCCGAAGAGGGGCGGAGCCGCGCAGCGCAACTCTCAGCTCTGC GCGGGGGCGGGTCTCTAACTCCCCGCCCACCTAGGGAGGTCCTCTGCCGGTCCCGCCCACTCCAGGCCTCCGCTC	246	2	y	2.2e-08	+ ++++++++++++
chr2:144011191-144011688	226	AGGAGGAGCTGCGGGGAGCCGCGGGGGGCGGGGCCGAAGAGGGGCGGAGCCGCGCAGCGCAACTCTCAGCTCTGC GCGGGGGCGGGTCTCTAACTCCCCGCCCACCTAGGGAGGTCCTCTGCCGGTCCCGCCCACTCCAGGCCTCCGCTC	262	2	y	2.6e-06	+++++++++ ++
chr2:144011191-144011688	226	AGGAGGAGCTGCGGGGAGCCGCGGGGGGCGGGGCCGAAGAGGGGCGGAGCCGCGCAGCGCAACTCTCAGCTCTGC GCGGGGGCGGGTCTCTAACTCCCCGCCCACCTAGGGAGGTCCTCTGCCGGTCCCGCCCACTCCAGGCCTCCGCTC	300	2	y	8.8e-06	+ +++++++++ +
chr2:144011191-144011688	226	AGGAGGAGCTGCGGGGAGCCGCGGGGGGCGGGGCCGAAGAGGGGCGGAGCCGCGCAGCGCAACTCTCAGCTCTGC GCGGGGGCGGGTCTCTAACTCCCCGCCCACCTAGGGAGGTCCTCTGCCGGTCCCGCCCACTCCAGGCCTCCGCTC	320	2	n	1.1e-05	+++++++++++
chr2:144011191-144011688	226	AGGAGGAGCTGCGGGGAGCCGCGGGGGGCGGGGCCGAAGAGGGGCGGAGCCGCGCAGCGCAACTCTCAGCTCTGC GCGGGGGCGGGTCTCTAACTCCCCGCCCACCTAGGGAGGTCCTCTGCCGGTCCCGCCCACTCCAGGCCTCCGCTC	350	2	n	6.4e-08	++++++++++++++
chr2:144011191-144011688	376	TCCACGCCACCGCTTATTCGGATTTGGCTCCGCCTAGGCCGATAGACTGCGGTTCGAATCCCCTTGGCCGCAGGC	402	2	n	4e-05	++ +++++++ ++
chr9:122294363-122294842	1	TAAGGCGGACTGGATACACGACCGGGGCGTGGCGCCTTGGCCGACAGGAGGCGTCAACGACCGGGAGGGGCGGGG CCTTCCGGCTGTCACTCGGCGTGGGGGGCGGGATCACCGTGAAAGGGGCGGTGCCTTAACAGTTGTAAGTCCCGA	63	2	y	1.4e-08	++++++++++++++
chr9:122294363-122294842	1	TAAGGCGGACTGGATACACGACCGGGGCGTGGCGCCTTGGCCGACAGGAGGCGTCAACGACCGGGAGGGGCGGGG CCTTCCGGCTGTCACTCGGCGTGGGGGGCGGGATCACCGTGAAAGGGGCGGTGCCTTAACAGTTGTAAGTCCCGA	82	3	n	1.7e-05	++++++++ ++
chr9:122294363-122294842	1	TAAGGCGGACTGGATACACGACCGGGGCGTGGCGCCTTGGCCGACAGGAGGCGTCAACGACCGGGAGGGGCGGGG CCTTCCGGCTGTCACTCGGCGTGGGGGGCGGGATCACCGTGAAAGGGGCGGTGCCTTAACAGTTGTAAGTCCCGA	96	2	y	3e-06	+ +++++++++++
chr9:122294363-122294842	1	TAAGGCGGACTGGATACACGACCGGGGCGTGGCGCCTTGGCCGACAGGAGGCGTCAACGACCGGGAGGGGCGGGG CCTTCCGGCTGTCACTCGGCGTGGGGGGCGGGATCACCGTGAAAGGGGCGGTGCCTTAACAGTTGTAAGTCCCGA	116	2	y	2.3e-05	+ +++++++++ ++
chr9:122294363-122294842	151	GGAAGGGGGGCGGAGGTGTCAGAGTGAAGCTTCACTGGCTGACCCTCGGGAGAGGGGTGGGGCCGCGACGGAAGG GGCGGGGCCATGAAGGTTCTCATTTTGGTGGGATGTGGTGGTGCTGCATGGGCGTGGCCTCATCAGCTGTCGTTG	153	2	y	2.3e-05	+++++++++ +
chr9:122294363-122294842	151	GGAAGGGGGGCGGAGGTGTCAGAGTGAAGCTTCACTGGCTGACCCTCGGGAGAGGGGTGGGGCCGCGACGGAAGG GGCGGGGCCATGAAGGTTCTCATTTTGGTGGGATGTGGTGGTGCTGCATGGGCGTGGCCTCATCAGCTGTCGTTG	200	2	y	3e-06	+ ++++++ +++++
chr9:122294363-122294842	151	GGAAGGGGGGCGGAGGTGTCAGAGTGAAGCTTCACTGGCTGACCCTCGGGAGAGGGGTGGGGCCGCGACGGAAGG GGCGGGGCCATGAAGGTTCTCATTTTGGTGGGATGTGGTGGTGCTGCATGGGCGTGGCCTCATCAGCTGTCGTTG	220	2	y	4.5e-09	++++++++++++++
chr9:122294363-122294842	301	TAGAGAGACATGTTAAAGGCGGGGCTGTGGCGAGTGGGGTGGGGCTTGGGTTGCTGTCACTCACGGCAGAAAGGG	312	2	y	3.4e-06	+ + +++++++++
chr9:122294363-122294842	301	TAGAGAGACATGTTAAAGGCGGGGCTGTGGCGAGTGGGGTGGGGCTTGGGTTGCTGTCACTCACGGCAGAAAGGG	332	2	y	1.4e-05	+ + ++++ +++++
chr9:122294363-122294842	301	TAGAGAGACATGTTAAAGGCGGGGCTGTGGCGAGTGGGGTGGGGCTTGGGTTGCTGTCACTCACGGCAGAAAGGG	352	3	n	1.1e-06	+++++++ +++++
chr9:122294363-122294842	376	AGCCTCATCCGGAGGGGTGGGGCCTCGCTAGCGGTCCTCGTGGTGGTATGGGTGCGGGCTGGGTCTTGGCTTTGC	385	2	y	3.8e-06	+++++++ +++++
chr2:177840374-177840564	1	TCTTCTGACTGGCAGGTCAACGTGGAGGTTCTGATTGGCTATTGAGTCTTGAGTGACATGAGCACCACCCTTAGG	4	3	y	8.4e-06	++++++ +++++
chr2:177840374-177840564	1	TCTTCTGACTGGCAGGTCAACGTGGAGGTTCTGATTGGCTATTGAGTCTTGAGTGACATGAGCACCACCCTTAGG	28	1	y	3.7e-08	+++++++++++++
chr2:177840374-177840564	1	TCTTCTGACTGGCAGGTCAACGTGGAGGTTCTGATTGGCTATTGAGTCTTGAGTGACATGAGCACCACCCTTAGG	48	3	y	7.7e-06	+++++ +++++ +
chr9:4376281-4376668	1	AAGACTGTCTCTAGGGACCAATCCTTTGCTAGAGGACGCTTGATTGACAGGGTCACGTGGCAAAAAGTGAGCGCT	39	3	y	4.9e-07	+++++++++++++
chr9:4376281-4376668	226	AGCAACAGCCATCTCAGCCAATCGGAGCAGGCAGAAGTTGGTGGGCGGGGACTCCATGAAGCATCTCTTTTCCAG	240	1	n	1.1e-06	+++++++++++++
chr9:4376281-4376668	226	AGCAACAGCCATCTCAGCCAATCGGAGCAGGCAGAAGTTGGTGGGCGGGGACTCCATGAAGCATCTCTTTTCCAG	263	2	y	1.6e-05	+++++++++++
chr8:75033549-75034293	1	TCAGGGGCGTGGCTTAGAAGCCGGCCCTCCCAGGCCCCGCCCTGGTGTGGCGTCAGCCACGGCCCAGGGGCAGCC	34	2	n	1.6e-05	+++++++++
chr8:75033549-75034293	76	TAGTAGGGGGCGGGGCCTCGTGGCTGCGCTCCAGAGCCCCCGCCTGCCGGCACCACCCCGCGGGCTGGCCAACGG	78	2	y	2.2e-08	+ ++++++++++++
chr8:75033549-75034293	301	AGTCCCGCCCCTGTGTGCCGCTCTGGCCTTGGCCCTGGGACCTGTCGGAGTCCGCAGTCTGGCAGACAGGAGGGA	302	2	n	2.3e-06	+++++++++++
chr8:75033549-75034293	376	GGCTAGGCGGTGAGGCTGGCGCGGCGCTCTGGGCTCCGCCCACCCTATGACCCACCTGATTGACAAGAACACGGG CCAATCGGAAGTCTTATATGGGGATTGATGCTTGATGTAGCCAATAGGCAGTGGAAGGAGGCGGTCCTGGGCGGA	408	2	n	1.8e-06	++ ++++++++++
chr8:75033549-75034293	376	GGCTAGGCGGTGAGGCTGGCGCGGCGCTCTGGGCTCCGCCCACCCTATGACCCACCTGATTGACAAGAACACGGG CCAATCGGAAGTCTTATATGGGGATTGATGCTTGATGTAGCCAATAGGCAGTGGAAGGAGGCGGTCCTGGGCGGA	430	3	y	7.7e-06	+ +++++++++ +
chr8:75033549-75034293	376	GGCTAGGCGGTGAGGCTGGCGCGGCGCTCTGGGCTCCGCCCACCCTATGACCCACCTGATTGACAAGAACACGGG CCAATCGGAAGTCTTATATGGGGATTGATGCTTGATGTAGCCAATAGGCAGTGGAAGGAGGCGGTCCTGGGCGGA	448	1	n	7.3e-06	+++++++++++++
chr8:75033549-75034293	376	GGCTAGGCGGTGAGGCTGGCGCGGCGCTCTGGGCTCCGCCCACCCTATGACCCACCTGATTGACAAGAACACGGG CCAATCGGAAGTCTTATATGGGGATTGATGCTTGATGTAGCCAATAGGCAGTGGAAGGAGGCGGTCCTGGGCGGA	488	1	n	9.3e-06	++++++++ ++ ++
chr8:75033549-75034293	376	GGCTAGGCGGTGAGGCTGGCGCGGCGCTCTGGGCTCCGCCCACCCTATGACCCACCTGATTGACAAGAACACGGG CCAATCGGAAGTCTTATATGGGGATTGATGCTTGATGTAGCCAATAGGCAGTGGAAGGAGGCGGTCCTGGGCGGA	504	2	y	9.3e-05	+ +++++++++ +
chr8:117475100-117476156	1	CGGGGAGGGCGGGGCTTGCAGGCACTTCCCAGTCTCTGCTGCCCCCTGGTGGCCAGATCAGTAACAGTCCAGCAG	2	2	y	2.7e-08	++++ +++++++++
chr8:117475100-117476156	151	GAGGGCTCCACCcttcctttcctgctccttcttttttttttttttttgtttttttgttttttgagacggggtttc	155	2	n	3.3e-05	++ ++ +++ +++
chr8:117475100-117476156	601	CTTGATGACTTCAGTCTCCGGAAACATTACCAGGTGGGACAGACGTGTCTCCAGATTGGCAGATGTCTCCTAGGC	651	3	y	4.2e-05	+ +++++ +++ +
chr8:117475100-117476156	826	CCTGATTGACAGCCAGTGCCCCAGTGAGTTTTAGGGTACCTGTTTAGAACGTGTACCAGGCCGGCGCAGAGACCA	826	3	y	4.7e-08	+ ++++++++++++
chr8:117475100-117476156	901	CAGACAGGGAAGTGAAAGTTAGGGCGGAACTTGGTGGGGCCTGGAGGGGGTGGGGCACTGCCTCAGGATGCTGTG	917	2	y	3.8e-05	+ ++++++ ++
chr8:117475100-117476156	901	CAGACAGGGAAGTGAAAGTTAGGGCGGAACTTGGTGGGGCCTGGAGGGGGTGGGGCACTGCCTCAGGATGCTGTG	943	2	y	5.6e-07	++++++++ +++++
chr5:73256583-73257019	1	CCGACGGGCGCCCGGCAGTGCTGCGAGCTCTGCCCACCCCTTCTCTGCCCCGCCCACCCACTCGCCTTCCTGATT GGCGAAGGATACTACACCAGGAACAGCGGTCCTCGCCCTCCACTGGCCGGCCTCCCCGCCGCTCAGAGTTTCCCC	31	2	n	6.3e-05	+++ +++++++
chr5:73256583-73257019	1	CCGACGGGCGCCCGGCAGTGCTGCGAGCTCTGCCCACCCCTTCTCTGCCCCGCCCACCCACTCGCCTTCCTGATT GGCGAAGGATACTACACCAGGAACAGCGGTCCTCGCCCTCCACTGGCCGGCCTCCCCGCCGCTCAGAGTTTCCCC	47	2	n	1e-06	+++++++++++++
chr5:73256583-73257019	1	CCGACGGGCGCCCGGCAGTGCTGCGAGCTCTGCCCACCCCTTCTCTGCCCCGCCCACCCACTCGCCTTCCTGATT GGCGAAGGATACTACACCAGGAACAGCGGTCCTCGCCCTCCACTGGCCGGCCTCCCCGCCGCTCAGAGTTTCCCC	67	1	y	8e-05	+ +++++++++ +
chr5:73256583-73257019	1	CCGACGGGCGCCCGGCAGTGCTGCGAGCTCTGCCCACCCCTTCTCTGCCCCGCCCACCCACTCGCCTTCCTGATT GGCGAAGGATACTACACCAGGAACAGCGGTCCTCGCCCTCCACTGGCCGGCCTCCCCGCCGCTCAGAGTTTCCCC	105	2	n	8.4e-05	++ +++++ ++ +
chr5:73256583-73257019	151	ACCTTCGCCCCGCCCCCTCCCCCGGGTTGGACCTACCTCTAATCACTCTCGGTCCTCGCCTCCAACGTTGCTTTG	157	2	n	1.1e-09	++++++++++++++
chr5:73256583-73257019	226	GAGAACTGGCAGTCACGGCTCACCCTCCCGCCTCCGGAAAGCTAACTTTATTTTTATTGGTAGAAAGACATCTTC	250	2	n	9.9e-05	++++++++++
chr5:73256583-73257019	226	GAGAACTGGCAGTCACGGCTCACCCTCCCGCCTCCGGAAAGCTAACTTTATTTTTATTGGTAGAAAGACATCTTC	275	1	y	5.3e-05	++ + ++++++ +
chr7:90475938-90476392	1	TCGACTCGGACCAACTTGGTCGCTGGGACGCCGCCATCTTAGCGCCTCACGTGACTGACAGGAGGGCGTGGCCGG	50	3	y	5.5e-07	+++++++++++++
chr7:90475938-90476392	76	AGCGCCTGGGGCGGGACTTGCAGCTGTCTGACAGCTCGTACCTTTAGTCCGGTACTCCCCCACCCAGTCAAAAGC	79	2	y	7.9e-06	+ ++++++++++
chr7:90475938-90476392	151	CGCGCCCTCCAGCCGGGCGGAGGTTGGGCGTGGCGTCGCAGAAGTGCGATCTCTCATTGGCTCCGAGGAAGGCTC	200	1	y	3.7e-06	++++ +++++++
chr7:90475938-90476392	226	AGGGTCAGGGGCCCGCCCCTAGCCAGCCTTGCCTTGTCCTCTGCCAAATTGTCAGCCTGGCCAACCTGAAGGGAA	235	2	n	3e-06	+ +++++++++ +
chr14:63177863-63178299	1	GAGGAGGCGGGGCCAGCGCCGGACGTCCCGCCCACCTCCCGCCCTCCTCAACCGGCCGCGCCGCTCGCGCCTCCA	25	2	n	2.8e-07	++++++++++++ +
chr14:63177863-63178299	76	GGCTAGGACGCGCGGAGTGGACTGACGGACGTTGATTGGCCAGAGCTGCTCGCACCAGGAAAACGTTAACCAATC GGAAGCCGGAGGAGCCTGGCGCGATGACCACACCCTAGAATTTGATTGGAGAGCTGGAAAGCAGCCAGCGAACAC	104	1	y	1.8e-05	+ ++++++++++
chr14:63177863-63178299	76	GGCTAGGACGCGCGGAGTGGACTGACGGACGTTGATTGGCCAGAGCTGCTCGCACCAGGAAAACGTTAACCAATC GGAAGCCGGAGGAGCCTGGCGCGATGACCACACCCTAGAATTTGATTGGAGAGCTGGAAAGCAGCCAGCGAACAC	142	1	n	2.7e-07	++++++++++++++
chr1:7397708-7398347	76	CGGGACAGCGGCGCTCACAAAGGCGGAGAGACCCTTGCCGGGCAGTTTTCGGGTGGTAGAGGCGGGAAAACGGAA	91	2	y	6.7e-05	+ ++++++ +
chr1:7397708-7398347	76	CGGGACAGCGGCGCTCACAAAGGCGGAGAGACCCTTGCCGGGCAGTTTTCGGGTGGTAGAGGCGGGAAAACGGAA	130	2	y	7.2e-06	++ ++++++++++
chr1:7397708-7398347	151	GGCTCAGTTCTGTGCACCCGCGCCACGTGAGAGTTCCAGTCTGTGGCAGGAAGTCCCGCCCGCTCGGTCGTGATT GACGGCAGCGGCTTTCAATCAGGAAGCTTCCCCACTTGCTATTTCCAGGAGCAGGGAATAGCGCCAGAAGTCCCG CCCGCCCGGCTGTGACTGACAGCCGCGCCTTCCAATGGAAGGCTGGATTTCTTCCCCCCCCCCTCCCCCACACAC	203	2	n	9.6e-06	+++++++++ +++
chr1:7397708-7398347	151	GGCTCAGTTCTGTGCACCCGCGCCACGTGAGAGTTCCAGTCTGTGGCAGGAAGTCCCGCCCGCTCGGTCGTGATT GACGGCAGCGGCTTTCAATCAGGAAGCTTCCCCACTTGCTATTTCCAGGAGCAGGGAATAGCGCCAGAAGTCCCG CCCGCCCGGCTGTGACTGACAGCCGCGCCTTCCAATGGAAGGCTGGATTTCTTCCCCCCCCCCTCCCCCACACAC	219	3	y	4.5e-06	++++++++++ ++
chr1:7397708-7398347	151	GGCTCAGTTCTGTGCACCCGCGCCACGTGAGAGTTCCAGTCTGTGGCAGGAAGTCCCGCCCGCTCGGTCGTGATT GACGGCAGCGGCTTTCAATCAGGAAGCTTCCCCACTTGCTATTTCCAGGAGCAGGGAATAGCGCCAGAAGTCCCG CCCGCCCGGCTGTGACTGACAGCCGCGCCTTCCAATGGAAGGCTGGATTTCTTCCCCCCCCCCTCCCCCACACAC	295	2	n	1.3e-05	+++++++++ +++
chr1:7397708-7398347	151	GGCTCAGTTCTGTGCACCCGCGCCACGTGAGAGTTCCAGTCTGTGGCAGGAAGTCCCGCCCGCTCGGTCGTGATT GACGGCAGCGGCTTTCAATCAGGAAGCTTCCCCACTTGCTATTTCCAGGAGCAGGGAATAGCGCCAGAAGTCCCG CCCGCCCGGCTGTGACTGACAGCCGCGCCTTCCAATGGAAGGCTGGATTTCTTCCCCCCCCCCTCCCCCACACAC	311	3	y	3e-07	+++++++++++++
chr1:7397708-7398347	451	GTCCACGCCGCGCGGTGGGCGGGGCCCGGCTTCCCCTTCCATCGTGTCAATCACCCCGAGGGGGCGGTGCCGCCG	462	2	y	9.9e-08	+ ++++++++++++
chr1:7397708-7398347	451	GTCCACGCCGCGCGGTGGGCGGGGCCCGGCTTCCCCTTCCATCGTGTCAATCACCCCGAGGGGGCGGTGCCGCCG	492	3	n	2.2e-05	+ ++++++++++
chr1:7397708-7398347	451	GTCCACGCCGCGCGGTGGGCGGGGCCCGGCTTCCCCTTCCATCGTGTCAATCACCCCGAGGGGGCGGTGCCGCCG	507	2	y	1.8e-05	++++++++++ ++
chr1:7397708-7398347	526	CTGATGCCTGCAGCCGCCCCAGGCCCCGCCCCCGCCTCATGCTCACTCAGGTGAGACCCCACTCTGGTCTTAGCT	548	2	n	4.9e-08	+++++++++++ ++
chr1:7397708-7398347	601	GACGCCCTCCCCGCCCACTCGTGGGGGTCCTGGGAAACG	608	2	n	1e-06	++++++++++++
chr4:132533590-132533841	1	GCGTTGCGGGCGTGGCTGCTTCTCTCCTAGCGCGCTAACTGCGAGGGCGGCTGAACTGCCAATCTAGACGCCGGG GAGGTGGGACGAGCACGGAAACCGCGAATCAGGAGGGAGGGGGCGGGGCTTATGATATCTGCAGCGTTTGTTGAG AGGGAGGCGGATTTATCCCTTAGTTAACAGTTAATAAACAAGGCTCTAACGCATCATGACCCAGGAGTCTACAGA	54	3	n	4.5e-05	+ +++ +++++ ++
chr4:132533590-132533841	1	GCGTTGCGGGCGTGGCTGCTTCTCTCCTAGCGCGCTAACTGCGAGGGCGGCTGAACTGCCAATCTAGACGCCGGG GAGGTGGGACGAGCACGGAAACCGCGAATCAGGAGGGAGGGGGCGGGGCTTATGATATCTGCAGCGTTTGTTGAG AGGGAGGCGGATTTATCCCTTAGTTAACAGTTAATAAACAAGGCTCTAACGCATCATGACCCAGGAGTCTACAGA	72	2	y	1.2e-05	+++++++ +++++
chr4:132533590-132533841	1	GCGTTGCGGGCGTGGCTGCTTCTCTCCTAGCGCGCTAACTGCGAGGGCGGCTGAACTGCCAATCTAGACGCCGGG GAGGTGGGACGAGCACGGAAACCGCGAATCAGGAGGGAGGGGGCGGGGCTTATGATATCTGCAGCGTTTGTTGAG AGGGAGGCGGATTTATCCCTTAGTTAACAGTTAATAAACAAGGCTCTAACGCATCATGACCCAGGAGTCTACAGA	111	2	y	1.1e-09	++++++++++++++
chr4:132533590-132533841	1	GCGTTGCGGGCGTGGCTGCTTCTCTCCTAGCGCGCTAACTGCGAGGGCGGCTGAACTGCCAATCTAGACGCCGGG GAGGTGGGACGAGCACGGAAACCGCGAATCAGGAGGGAGGGGGCGGGGCTTATGATATCTGCAGCGTTTGTTGAG AGGGAGGCGGATTTATCCCTTAGTTAACAGTTAATAAACAAGGCTCTAACGCATCATGACCCAGGAGTCTACAGA	150	2	y	7.5e-05	+ +++++++++
chr5:140830423-140830894	1	CGCCCCGAGGCCCTCACTCGCCGGGCCGGCTGAGGGGCGGAGGGGAAGGCGCGGAGGGCGGGGCGGCGCCGCGCA	30	2	y	3.8e-05	+++++++++ +
chr5:140830423-140830894	1	CGCCCCGAGGCCCTCACTCGCCGGGCCGGCTGAGGGGCGGAGGGGAAGGCGCGGAGGGCGGGGCGGCGCCGCGCA	51	2	y	1.3e-07	+ ++ +++++++++
chr5:140830423-140830894	76	GAAACTCTTTTATTGGTTGGGAAGTCTTCTATCTTGGGCAGCGCGCTTTTTTACTGGACAAGCGTGCCTTGGAGG AGGCGGGCACTCCTGTGGTCCTTGGGGCGGAGCCGGTGCCGAAAAAGGCGGGATCTTTTCGATGAGGGAGCTTCT TATTGGACTGCTGAGCAAACTTCTTTCTTTCAGAATGAAAGGGAGGTGGGGCCATTGAGGAGGAGGAGCTGAAGC	81	1	y	2.8e-06	++ + ++++++++
chr5:140830423-140830894	76	GAAACTCTTTTATTGGTTGGGAAGTCTTCTATCTTGGGCAGCGCGCTTTTTTACTGGACAAGCGTGCCTTGGAGG AGGCGGGCACTCCTGTGGTCCTTGGGGCGGAGCCGGTGCCGAAAAAGGCGGGATCTTTTCGATGAGGGAGCTTCT TATTGGACTGCTGAGCAAACTTCTTTCTTTCAGAATGAAAGGGAGGTGGGGCCATTGAGGAGGAGGAGCTGAAGC	146	2	y	6.5e-06	++++++++++++
chr5:140830423-140830894	76	GAAACTCTTTTATTGGTTGGGAAGTCTTCTATCTTGGGCAGCGCGCTTTTTTACTGGACAAGCGTGCCTTGGAGG AGGCGGGCACTCCTGTGGTCCTTGGGGCGGAGCCGGTGCCGAAAAAGGCGGGATCTTTTCGATGAGGGAGCTTCT TATTGGACTGCTGAGCAAACTTCTTTCTTTCAGAATGAAAGGGAGGTGGGGCCATTGAGGAGGAGGAGCTGAAGC	170	2	y	1.6e-05	+++++++ ++
chr5:140830423-140830894	76	GAAACTCTTTTATTGGTTGGGAAGTCTTCTATCTTGGGCAGCGCGCTTTTTTACTGGACAAGCGTGCCTTGGAGG AGGCGGGCACTCCTGTGGTCCTTGGGGCGGAGCCGGTGCCGAAAAAGGCGGGATCTTTTCGATGAGGGAGCTTCT TATTGGACTGCTGAGCAAACTTCTTTCTTTCAGAATGAAAGGGAGGTGGGGCCATTGAGGAGGAGGAGCTGAAGC	191	2	y	1.2e-05	+ ++ ++++++++
chr5:140830423-140830894	76	GAAACTCTTTTATTGGTTGGGAAGTCTTCTATCTTGGGCAGCGCGCTTTTTTACTGGACAAGCGTGCCTTGGAGG AGGCGGGCACTCCTGTGGTCCTTGGGGCGGAGCCGGTGCCGAAAAAGGCGGGATCTTTTCGATGAGGGAGCTTCT TATTGGACTGCTGAGCAAACTTCTTTCTTTCAGAATGAAAGGGAGGTGGGGCCATTGAGGAGGAGGAGCTGAAGC	221	1	y	3.3e-05	+++++ +++++ +
chr5:140830423-140830894	76	GAAACTCTTTTATTGGTTGGGAAGTCTTCTATCTTGGGCAGCGCGCTTTTTTACTGGACAAGCGTGCCTTGGAGG AGGCGGGCACTCCTGTGGTCCTTGGGGCGGAGCCGGTGCCGAAAAAGGCGGGATCTTTTCGATGAGGGAGCTTCT TATTGGACTGCTGAGCAAACTTCTTTCTTTCAGAATGAAAGGGAGGTGGGGCCATTGAGGAGGAGGAGCTGAAGC	264	2	y	1.2e-05	++++++ +++++
chr5:140830423-140830894	301	CCTTCGCAACCAATTAGAAGTGCTCTGATCGTTTGTCAGTCACAATAACTACGCTTGGGATTGGAAGTTGTGGGA AATGGGGCGAGGCCAAAAGTGCCAGGTGTACAGAGTGACTCTCTGCCTTGATTCCCAGGTTGGTCCGGCTGTGAG	331	3	n	1.6e-05	+ ++++++++++
chr5:140830423-140830894	301	CCTTCGCAACCAATTAGAAGTGCTCTGATCGTTTGTCAGTCACAATAACTACGCTTGGGATTGGAAGTTGTGGGA AATGGGGCGAGGCCAAAAGTGCCAGGTGTACAGAGTGACTCTCTGCCTTGATTCCCAGGTTGGTCCGGCTGTGAG	375	2	y	7.5e-05	+ ++++++ +++
chr4:59581402-59581853	1	TACGTAGTAATGATGCTCTAGACACGCCAGTGGCCCACAGGAGAAACTGATTGTCACCTACAGACTCGGGAAAGG GGCGGGGCGGAGGTGTACTCCAAAGCGCCTGCGCAGAGCGTTGGTTTCCTGGGTGTCGTTTGTAGAACTGCGGGA	70	2	y	2.2e-08	+ ++++++++++++
chr4:59581402-59581853	226	TAGGAGGGCCGGTCCCCGAGCGGGTCTcggggcggggcccggggcgcggcTAAATGCGGAGAGAAAGTTCGCCTG TCACTCACAGCTCGCTGCTGTTCCACTGCCACCAAGTTCTCTGAACTGCGAAGGTCATGCTGCCCAACACTGGGT	250	2	y	2.1e-05	++++++++++
chr4:59581402-59581853	226	TAGGAGGGCCGGTCCCCGAGCGGGTCTcggggcggggcccggggcgcggcTAAATGCGGAGAGAAAGTTCGCCTG TCACTCACAGCTCGCTGCTGTTCCACTGCCACCAAGTTCTCTGAACTGCGAAGGTCATGCTGCCCAACACTGGGT	296	3	n	6.5e-07	++++++++ ++++
chr4:59581402-59581853	376	AAGAGGACGGGGGTGGGATGGGGTCAGGGGCCAGTCGGCAGGTCGCCGGCGCAACCCAGAGCCGCGCGCTCTGGA	381	2	y	3.8e-05	+ +++++ ++++
chr9:109875260-109875709	76	TTCATTGACTCCTTTCTCATTTCAGCCACCTCCCAACTCTTCAGGCTTCGCCCCCACCGAGAGAGGGCGTGACCT	120	2	n	3.5e-05	++ +++++++ ++
chr9:109875260-109875709	76	TTCATTGACTCCTTTCTCATTTCAGCCACCTCCCAACTCTTCAGGCTTCGCCCCCACCGAGAGAGGGCGTGACCT	135	2	y	5.2e-05	+++ +++++ +++
chr9:109875260-109875709	151	CGAGGAGGCCCACGAGACGCTTCCTCCTTTCCTTCTCATTGGTCCGGCTCAGCTGTCATTCGGGAGCGAGGAGAA	182	1	y	6.5e-06	+++++ +++++++
chr9:109875260-109875709	151	CGAGGAGGCCCACGAGACGCTTCCTCCTTTCCTTCTCATTGGTCCGGCTCAGCTGTCATTCGGGAGCGAGGAGAA	201	3	n	5.1e-05	++++++++ ++ +
chr9:109875260-109875709	226	GTTTGCTTCCTGATTGGTGAATTCCGTTTGGCGCCAACTAGGAAAGGGGCGGGGCGGCGGCTATCCTGAGTGTGC	232	1	y	8e-05	+ +++++++++ +
chr9:109875260-109875709	226	GTTTGCTTCCTGATTGGTGAATTCCGTTTGGCGCCAACTAGGAAAGGGGCGGGGCGGCGGCTATCCTGAGTGTGC	267	2	y	2.2e-08	+ ++++++++++++
chr11:87108752-87109387	1	TCTACAGGGTTCGTTGTCTTGAAAGGATCAAAGCACAGCTTGGACTACGATTGGCCAAAAGAGCATCACATCCTG GCCAATCGGAACTGAGGCGCTTCTTGTATGAATAAGGAAAGGCGGGCGAGAAGGGGCGGGGAAGCCGGAGAGAAA	44	1	y	3.3e-05	++ ++++++++++
chr11:87108752-87109387	1	TCTACAGGGTTCGTTGTCTTGAAAGGATCAAAGCACAGCTTGGACTACGATTGGCCAAAAGAGCATCACATCCTG GCCAATCGGAACTGAGGCGCTTCTTGTATGAATAAGGAAAGGCGGGCGAGAAGGGGCGGGGAAGCCGGAGAGAAA	74	1	n	2.8e-06	+++++++++++++
chr11:87108752-87109387	1	TCTACAGGGTTCGTTGTCTTGAAAGGATCAAAGCACAGCTTGGACTACGATTGGCCAAAAGAGCATCACATCCTG GCCAATCGGAACTGAGGCGCTTCTTGTATGAATAAGGAAAGGCGGGCGAGAAGGGGCGGGGAAGCCGGAGAGAAA	110	2	y	8.8e-05	+++ +++++++
chr11:87108752-87109387	1	TCTACAGGGTTCGTTGTCTTGAAAGGATCAAAGCACAGCTTGGACTACGATTGGCCAAAAGAGCATCACATCCTG GCCAATCGGAACTGAGGCGCTTCTTGTATGAATAAGGAAAGGCGGGCGAGAAGGGGCGGGGAAGCCGGAGAGAAA	124	2	y	1.4e-06	++++++++++++
chr11:87108752-87109387	151	AGGAGGTGTGTCACGTCGCCTAGGCCCGCAGTGGAAGCTTTTATGTCATTGGCTGCTGCTGCTTCCGAGTACACC	192	1	y	1.8e-05	+ + ++++++++
chr11:87108752-87109387	226	AATCGCAAACTCTTTTCCAAGTATGAACTTGAAAGTAGGGACCATAAGGCAGCCAATGGAAAAATTCATATATTC	275	1	n	5.6e-06	++++++++ + ++
chr11:87108752-87109387	376	AGGCGCCAATGGGCGGGCGCCGATGGAACGTACTAGCCAATGAGCGCAAGACGTTGAGTGACAGCTGTCCAATGG	381	2	y	4.9e-05	++++++++++
chr11:87108752-87109387	376	AGGCGCCAATGGGCGGGCGCCGATGGAACGTACTAGCCAATGAGCGCAAGACGTTGAGTGACAGCTGTCCAATGG	409	1	n	4.8e-06	++++++++ ++ +
chr11:87108752-87109387	376	AGGCGCCAATGGGCGGGCGCCGATGGAACGTACTAGCCAATGAGCGCAAGACGTTGAGTGACAGCTGTCCAATGG	428	3	y	6.5e-07	++++ ++++++++
chr11:87108752-87109387	451	AGGGCCTCAGTGCTAGCACGGCTTACAGCTTAAGCGCCTCAGCGGTCTGAGGAATGTCAACTATTCAATATGGAG GCGGAGGTCGATAAGCTGGAACTGATGGTGAGTGGAGAGTGAAGGAAACCTACTGGGTAATTAATGTGCTCCACC	519	2	y	9.9e-05	++++++++ +
chr5:122502181-122502590	76	CGCCGCCGCCGCGGCATGTGGACGCCGCTCATTGGCCGAGAGAGCCCCCAgcgcggcgcgggcggcgcggccccg ccccctcctccggcgccctcccgcgcgcgcgcaccgcgcgcccacgccgccagcaggccccgcctcctcccgcgc	100	1	y	1.3e-05	++ ++ ++++++++
chr5:122502181-122502590	76	CGCCGCCGCCGCGGCATGTGGACGCCGCTCATTGGCCGAGAGAGCCCCCAgcgcggcgcgggcggcgcggccccg ccccctcctccggcgccctcccgcgcgcgcgcaccgcgcgcccacgccgccagcaggccccgcctcctcccgcgc	145	2	n	1.1e-09	++++++++++++++
chr5:122502181-122502590	76	CGCCGCCGCCGCGGCATGTGGACGCCGCTCATTGGCCGAGAGAGCCCCCAgcgcggcgcgggcggcgcggccccg ccccctcctccggcgccctcccgcgcgcgcgcaccgcgcgcccacgccgccagcaggccccgcctcctcccgcgc	207	2	n	2.2e-08	++++++++++++++
chr5:122820869-122821602	1	GGGCCCCTCCCCCGGGGCTGGACCTTCCCTGCCCTCCAGCTCAGGGCGGGGCCCACGCGAAGCGCGCGCGCGCGT	3	2	n	6.7e-05	+++++ +++++
chr5:122820869-122821602	1	GGGCCCCTCCCCCGGGGCTGGACCTTCCCTGCCCTCCAGCTCAGGGCGGGGCCCACGCGAAGCGCGCGCGCGCGT	39	2	y	7.2e-06	+ +++++++++
chr5:122820869-122821602	76	GCGGTAATGGGCGGGAAAGAGCGGGCGCCCCTCACCTGCAGCAGGGGCAGGAGCAGCTGGTTGAGCTTCCGCCGC	79	2	y	6.5e-06	+ +++++++++++
chr5:122820869-122821602	451	CCCCGGCGGTGCCTTCGACCAATCAAAGACCAGAAGGAAGACTGACAGCCAATCAAAACAGCCAAACCTGTAGTG	466	1	n	2.8e-06	++++++++++ ++
chr5:122820869-122821602	451	CCCCGGCGGTGCCTTCGACCAATCAAAGACCAGAAGGAAGACTGACAGCCAATCAAAACAGCCAAACCTGTAGTG	496	1	n	2.1e-07	++++++++++ ++
chr5:122820869-122821602	526	AGCGGGGGTAGGGGAGGGGGTGGGACATAAATGGTGTTATGGCAAATCGGTTCCCTACAGAAACGCTCAACCAAG	538	2	y	1.6e-06	++++++++ +++++
chr17:84957152-84958126	76	TGCCAAAGAGAGGCGGCCACTTCTTCCAATGAGGGTCTAGGGGCACTTCTCTGGCCAATCAGAAGCCGGCTCTCT	127	1	n	2.7e-07	++++++++++++++
chr17:84957152-84958126	301	GATACTTTTGCGCGTTCATTTAAAAAAAGCCGAAGTGACGGACTTGGAAATTGGTTTCTTGACGGACAAGTAGAG	358	3	y	1.9e-05	++++++ ++++ ++
chr17:84957152-84958126	376	GAAGCCAATAGTCGGAGGATCAGGCCGCCATTTGAACCAATCAGAAAAGGATATCGGTCTTCGAGTTGGGGCGTA	377	1	n	9.1e-05	+++++++ + ++
chr17:84957152-84958126	376	GAAGCCAATAGTCGGAGGATCAGGCCGCCATTTGAACCAATCAGAAAAGGATATCGGTCTTCGAGTTGGGGCGTA	409	1	n	5.3e-07	++++++++++++
chr17:84957152-84958126	451	ATTTGACTGACGGAGGACTCTACCTATGGCTACTAGGGTGGGCAGGTCGGTGACGTCAGGAGTTAGGGCAAGGCG GAGGTGGGGCTGAATAAAGTAAATGGTAATGAAGGGTTGGGCCTCACTGGTGGGCGGTGTGTGATGGATAGTTGA	452	3	y	3.3e-05	+++++++++ +
chr17:84957152-84958126	451	ATTTGACTGACGGAGGACTCTACCTATGGCTACTAGGGTGGGCAGGTCGGTGACGTCAGGAGTTAGGGCAAGGCG GAGGTGGGGCTGAATAAAGTAAATGGTAATGAAGGGTTGGGCCTCACTGGTGGGCGGTGTGTGATGGATAGTTGA	522	2	y	7.9e-06	++ +++++ +++++
chr17:84957152-84958126	601	CCTTGCCAATTAAGGTGGGCACTGACGCCCAATGAGAAATTAAAGACTCAGAGGCGGGGCCGTGTGGGCGGGGAA	626	1	n	6.6e-05	++ +++++ ++++
chr17:84957152-84958126	601	CCTTGCCAATTAAGGTGGGCACTGACGCCCAATGAGAAATTAAAGACTCAGAGGCGGGGCCGTGTGGGCGGGGAA	647	2	y	5.3e-06	+++++++++++
chr17:84957152-84958126	601	CCTTGCCAATTAAGGTGGGCACTGACGCCCAATGAGAAATTAAAGACTCAGAGGCGGGGCCGTGTGGGCGGGGAA	661	2	y	2.6e-06	+ ++++++++++
chr17:84957152-84958126	676	AGAGAAGCACAGAAGATACTAGGGGCCAGGTTGGGCGGGAGAACGTAGATTGACAGGCTTCTCAGCAAACCGAGG	703	2	y	6.3e-05	++ +++++++++
chr17:84957152-84958126	676	AGAGAAGCACAGAAGATACTAGGGGCCAGGTTGGGCGGGAGAACGTAGATTGACAGGCTTCTCAGCAAACCGAGG	720	3	y	1.3e-06	+ +++++++++++
chr17:84957152-84958126	751	GCAGCGGTGACACACGCGGCGTCCCAATGGGTGCCCTTGGggggcggagcccgaggaggggcggggaaagacggc	787	2	y	7.9e-06	+++++++++ ++
chr17:84957152-84958126	751	GCAGCGGTGACACACGCGGCGTCCCAATGGGTGCCCTTGGggggcggagcccgaggaggggcggggaaagacggc	804	2	y	2e-06	++++++++++++
chr11:115276860-115277460	76	GCTGAGCGCAGGTCCAGCAGCCCGCCGAGGACGCTCCTCTGGACCCGCCCATCACTGGAGCCCCGCCCCAAGCCT	117	2	n	1.4e-05	+ ++++++++++ +
chr11:115276860-115277460	76	GCTGAGCGCAGGTCCAGCAGCCCGCCGAGGACGCTCCTCTGGACCCGCCCATCACTGGAGCCCCGCCCCAAGCCT	135	2	n	2e-06	++++++++++ +
chr11:115276860-115277460	226	ACCATGCCCCCATCTCGCCAAGGCCCCGCCCCCAGAACGTCCAATCCTCAAAAGCTTATCAAATTTCTCCGGTCT	248	2	n	1.8e-06	+++++++++++
chr11:115276860-115277460	451	GTTGTTTGAGTGATTTTTGTATCAGCCAATCAGAAGGCCAGAGCCCGGAAGTCTCGTGTATCCGCTATTCTTGAC	473	1	n	1.7e-08	++++++++++++++
chr15:100761682-100762065	1	AGGGTACCGCCGGACAGCGTCCTCCCGTGCTCCGCGCGCTGATTGGCTGCTCGGGGCGCCCTCTGATTGGCTGCT	36	1	y	1.7e-06	+ +++++++++++
chr15:100761682-100762065	1	AGGGTACCGCCGGACAGCGTCCTCCCGTGCTCCGCGCGCTGATTGGCTGCTCGGGGCGCCCTCTGATTGGCTGCT	60	1	y	6.8e-08	++++++++++++++
chr15:100761682-100762065	226	CGAGACCAGGCTCCGCCCGGCCATGCCCGCCGGGAGCAACGAGCCGGACGGCGTCCTCAGCTATCAGGTGGGCCC CGCCTCCCGCTCCTCCCCGGCTCAGCCTCGGTGTTCTGCCCACCGCCCCGCTCCTGCCCCAGCCGGGGTTCCAGG	297	2	n	1.9e-07	++++++++++++ +
chr8:26158018-26158919	1	TGCAGTCAGGATCCCAAACAAACGCGCTCTCTTCCGGCCAAGGCGCAGAGGGCCCACCCACTTCCGCACTGCTGA	51	2	n	1.5e-05	+ +++ ++++++ +
chr8:26158018-26158919	76	CCACGCCCCACAGGCGCGCCTCGCCCCAGCCAATGGTCAGCTTCCCTGGGAACGTTACCTTCAGCCAATCAGAGA	102	1	n	3.6e-05	++++++++ + ++
chr8:26158018-26158919	76	CCACGCCCCACAGGCGCGCCTCGCCCCAGCCAATGGTCAGCTTCCCTGGGAACGTTACCTTCAGCCAATCAGAGA	137	1	n	1.2e-07	+++++++++++++
chr8:26158018-26158919	226	TGTGGTCCTTCTGCTAAAGCAAACCCCACAACGGACAGGGTAGTCACTCCCCCACCCCAACCCCCACCCCACGGC	274	2	n	8.8e-05	++++ ++++ ++
chr8:26158018-26158919	376	CCGACGGCCCCCTTCGCCTGCCTCCCGGGCCGAAGGGAAGTGTGGAGGGCCAGAAGGATGGTGCAGTCCTGCTCC GCCTACGGCTGCAAGAACCGCTACGACAAGGACAAGCCCGTCTCCTTCCACAAGTAGGTAACTGGCGTGCTCCGC	446	2	n	9.6e-06	++ ++++++++ +
chr8:26158018-26158919	526	GGCCGCGGCGACAGgggcgcgcgggcgggtgggggcggagcccggcgcgtggccgcgcgagacctggaggaggcg gggcgggcgctcgggcgctcagggcggcggacgggccgggccggcgggggcgggGACCCACGGGGGCGCGTCCCC	553	2	y	3.4e-07	++ ++++++++ ++
chr8:26158018-26158919	526	GGCCGCGGCGACAGgggcgcgcgggcgggtgggggcggagcccggcgcgtggccgcgcgagacctggaggaggcg gggcgggcgctcgggcgctcagggcggcggacgggccgggccggcgggggcgggGACCCACGGGGGCGCGTCCCC	591	2	y	2.2e-08	++++++++++++++
chr8:26158018-26158919	526	GGCCGCGGCGACAGgggcgcgcgggcgggtgggggcggagcccggcgcgtggccgcgcgagacctggaggaggcg gggcgggcgctcgggcgctcagggcggcggacgggccgggccggcgggggcgggGACCCACGGGGGCGCGTCCCC	643	2	y	1e-06	++ ++++++++++
chr2:30474246-30474414	1	TTAGCTGGGCAGCAGCGCCCCGCCCCACTGTAGATTAGCCAATAGAAGCGTGTAGAGCCTTCCGACTGACAGCCA	17	2	n	2e-06	++++++++++ +
chr2:30474246-30474414	1	TTAGCTGGGCAGCAGCGCCCCGCCCCACTGTAGATTAGCCAATAGAAGCGTGTAGAGCCTTCCGACTGACAGCCA	36	1	n	8.3e-06	++++++++ + ++
chr2:30474246-30474414	1	TTAGCTGGGCAGCAGCGCCCCGCCCCACTGTAGATTAGCCAATAGAAGCGTGTAGAGCCTTCCGACTGACAGCCA	61	3	y	1.1e-05	+++++++++++
chr2:30474246-30474414	76	CTGCCCTCCCCGGGACCACTTGACTGGCCAATCAGACCAAGGCGGTTCCTTTGTGCTATTCAAATAACGAACGGA	100	1	n	2.6e-05	++++++++++++
chr9:61370516-61370854	1	TTGTCAGCGCTCCCCCACCCCTCGTGGTTTTGACTGACAGCTCTGGCTAAGGACTGACAGCTCTCGGAATCTCCA	12	2	n	7.1e-05	++++ ++++++
chr9:61370516-61370854	1	TTGTCAGCGCTCCCCCACCCCTCGTGGTTTTGACTGACAGCTCTGGCTAAGGACTGACAGCTCTCGGAATCTCCA	29	3	y	3e-07	+++++++++++++
chr9:61370516-61370854	1	TTGTCAGCGCTCCCCCACCCCTCGTGGTTTTGACTGACAGCTCTGGCTAAGGACTGACAGCTCTCGGAATCTCCA	49	3	y	2.4e-05	+++++++++++
chr9:61370516-61370854	76	CCAATTACTAGTCGAGAGTCTCTTTGCTGGTCTGTGATTGGGTTTTAGACTTGCTCGGGGGCGTGGCCGGCGCGC	106	1	y	8e-05	++ +++++++ +
chr9:61370516-61370854	76	CCAATTACTAGTCGAGAGTCTCTTTGCTGGTCTGTGATTGGGTTTTAGACTTGCTCGGGGGCGTGGCCGGCGCGC	129	2	y	6.7e-05	+++++++ +++
chr9:61370516-61370854	151	CCCACGTGGGGGCTGGAGCGAGAAAGGGGCGGGCCGGGTAGGAAGCGGGTGCGCCCACCCGTGACGTAAGGGGGA	172	2	y	9e-07	+ ++++++++++ +
chr9:61370516-61370854	226	GGGCAGAGAAGGGGGAGGGGAGAGGGAAGCTCCAAAGAGGAGCCATTTTGAGACTAATGGATGCTTTGGCCAGAT	233	2	y	5.2e-05	+ ++++++ ++++
chr4:129542616-129543053	1	GAGTCTGcgccatcttgctcgccgcccggccctcccgtcagtctgtccgcccgcccgcccgcGGCTCCTTACGGC	33	3	n	6.3e-05	++ +++++++
chr4:129542616-129543053	76	GTCCGACCAGGGGGAGGGGCCGGCCTCGAAGCCCCGCCCACCCCCGGGATCACCTATAGCCGCACAGCCCGGGCC	82	2	y	3.1e-05	++++++ +++++
chr4:129542616-129543053	76	GTCCGACCAGGGGGAGGGGCCGGCCTCGAAGCCCCGCCCACCCCCGGGATCACCTATAGCCGCACAGCCCGGGCC	106	2	n	2.2e-08	++++++++++++++
chr4:129542616-129543053	151	TCACTCTAACCAATCGGCATGCGCGGGGTCGGGCCCGGAACTCGGCGGGGGGCAAGGGCAGCTTAGAGAAGCCAC	157	1	n	7.3e-06	+++++++++++ +
chr4:129542616-129543053	226	CGCGGGCCCCCTGGGCCTGTACCAAAGTCCGGCGCGGAGGGGTGGGGGAGACCGGGGGCCGTACCATCGAGTCCC	260	2	y	4e-05	+++++++ ++++
chr7:89404215-89404491	1	AGAGGATCAAGCCGCGGGCGGGGGCCTGACCCTTACAGCAGGAGAGGAGCCCCGCCCCTTCCCGCCCCCTCTGAC	11	2	y	9.3e-05	+ + ++++++++
chr7:89404215-89404491	1	AGAGGATCAAGCCGCGGGCGGGGGCCTGACCCTTACAGCAGGAGAGGAGCCCCGCCCCTTCCCGCCCCCTCTGAC	49	2	n	4.5e-09	++++++++++++++
chr7:89404215-89404491	76	CAGGGGGGGCTTTCATTGGACAGTCGCGTTGTCCGTCCCGCCCCGCCCCCGCCCTGCGAACCTCCAGCGCCACAG	84	1	y	3e-05	++ + +++++ ++
chr7:89404215-89404491	76	CAGGGGGGGCTTTCATTGGACAGTCGCGTTGTCCGTCCCGCCCCGCCCCCGCCCTGCGAACCTCCAGCGCCACAG	115	2	n	4.9e-08	+++++++++++ ++
chr11:43681706-43682161	1	TAAACCAATCCTAAAGCGGTATTTCCCCTACTAACCAATAGATACAGGCTGTAAGCACAGGGCGCCGCTTTTGCC	32	1	n	3.9e-05	++++++++ + +
chr11:43681706-43682161	76	ATCCTTCAGCCCGCCCCTCAAACTCCTTTTAGATTCTCCACTTGACAACTCACCTGACCAATGGGAAGTTCCTAC	83	2	n	5.9e-05	++++++++++
chr11:43681706-43682161	76	ATCCTTCAGCCCGCCCCTCAAACTCCTTTTAGATTCTCCACTTGACAACTCACCTGACCAATGGGAAGTTCCTAC	130	1	n	6.5e-06	++++++++ +++++
chr11:43681706-43682161	151	TCTGAGGGAGGGGGCGGGACTCAGCCCGCGACAGACGGCTCCTTCTGACCAATGGGTTGACAGAAGTGCGGAAGG	157	2	y	1.3e-08	++++++++++++++
chr11:43681706-43682161	226	GGGTGGAAGGCGGAGCCAATGGCGCGGTGCCAATCACGAGCATCAGGGAAAGGGCGGGACGAGAGTGTTAGCGGG	228	2	y	5.9e-06	+ ++ ++++++ ++
chr11:43681706-43682161	226	GGGTGGAAGGCGGAGCCAATGGCGCGGTGCCAATCACGAGCATCAGGGAAAGGGCGGGACGAGAGTGTTAGCGGG	272	2	y	2.3e-07	++++ +++++++++
chr16:55895173-55895688	1	GTCCGCGCGCGGAACACAGGGCTCTGCAGCTGCGGGGCGCACGAGGCACGCCGCACCGGGCGCTCTCGGGACAGG CTCCGCCCCGCCGCGCGCATAGTCGCAGCTCGCACTCACCGGGTCTCCGGTCTCGCTCGCCGCTCGCCCTCCCAC	75	2	n	9.6e-06	++ +++++++ ++
chr16:55895173-55895688	226	TCACCCCCGACCCCCGGCTACGATTGGTCCGACTATgggcggggcggggcggagcggggATGTTGACTGACAGCC	242	1	y	4.6e-05	++ +++++++++
chr16:55895173-55895688	226	TCACCCCCGACCCCCGGCTACGATTGGTCCGACTATgggcggggcggggcggagcggggATGTTGACTGACAGCC	262	2	y	9e-07	+++ ++++++++++
chr16:55895173-55895688	226	TCACCCCCGACCCCCGGCTACGATTGGTCCGACTATgggcggggcggggcggagcggggATGTTGACTGACAGCC	287	3	y	1.5e-07	+++++++++++++
chr5:113735587-113735981	1	CGACCCCGCCCCATGCACACAAGCGACAGCCAATGGAAGCGGCACACGGCGCGCCTTTCCCGGGGGGATGCTCTA	3	2	n	6.5e-06	+++++++++ + +
chr5:113735587-113735981	1	CGACCCCGCCCCATGCACACAAGCGACAGCCAATGGAAGCGGCACACGGCGCGCCTTTCCCGGGGGGATGCTCTA	27	1	n	8.3e-06	++++++++ + ++
chr5:113735587-113735981	151	CGTCCAATGGCGAGGCGACGGGAGCGGGGCGAGGTGGTGGGGGCGGGGCCTGCGACCGCGGCTGCGGGGAACGGC	186	2	y	1.3e-08	++ +++++++++++
chr5:113735587-113735981	226	CGCGCGGGTTTGGATGCTGGAGGCGGGCACGAGCCCTGGGCCGGTTCGTAGCGGGAGCTCGCGGCAGCCTCATTC	241	2	y	2.1e-05	+ +++++++++
chr5:113735587-113735981	301	CACCCCCCACCCCACCCCCCGCTTCGGGAGTAAGCCGAAGTCTGCTGGGCTCGAGCCGCTGCACAGGCCGCGCGA	309	2	n	1.3e-05	++++ ++++++ +
chr4:154160653-154160991	1	CGAcggccgccgccccggcgtccgcccggccgcgccccgcccTCCCTCGTTCGCCTTGTGATTGGTTGAGTCCTG	34	2	n	2.3e-07	+++++++++ +++
chr4:154160653-154160991	1	CGAcggccgccgccccggcgtccgcccggccgcgccccgcccTCCCTCGTTCGCCTTGTGATTGGTTGAGTCCTG	55	1	y	2.7e-07	+++ ++++++++++
chr4:154160653-154160991	76	CAGAGCCCGCCTTCCGGACCCGCCTCCAGCTCCGTCGACTGCGTCTCGCGATTGGCTTTCCCCTAAGCTGTCTTC	92	2	n	1.3e-05	+ +++++++++ +
chr4:154160653-154160991	76	CAGAGCCCGCCTTCCGGACCCGCCTCCAGCTCCGTCGACTGCGTCTCGCGATTGGCTTTCCCCTAAGCTGTCTTC	120	1	y	6.1e-05	++ +++++++++
chr18:38992895-38993322	1	AGCTCTGCAACCTTCGCTGAGCAGGAGGGGGCGGGGCTTGCTCTGCGGACCCAGGGGGTGGCACGGACTCCGCCC CTCTCCCCAGGCTCCGCCTTCAGAAATATCTGATTGGGTTAGAGTCGCGGAAGGGCAGGGCGTCCCCTGGCGGCC	24	2	y	1.1e-09	++++++++++++++
chr18:38992895-38993322	1	AGCTCTGCAACCTTCGCTGAGCAGGAGGGGGCGGGGCTTGCTCTGCGGACCCAGGGGGTGGCACGGACTCCGCCC CTCTCCCCAGGCTCCGCCTTCAGAAATATCTGATTGGGTTAGAGTCGCGGAAGGGCAGGGCGTCCCCTGGCGGCC	67	2	n	6.5e-06	+ +++++++++ +
chr18:38992895-38993322	1	AGCTCTGCAACCTTCGCTGAGCAGGAGGGGGCGGGGCTTGCTCTGCGGACCCAGGGGGTGGCACGGACTCCGCCC CTCTCCCCAGGCTCCGCCTTCAGAAATATCTGATTGGGTTAGAGTCGCGGAAGGGCAGGGCGTCCCCTGGCGGCC	86	2	n	3.3e-05	++ ++++++ +
chr18:38992895-38993322	151	CCGTGGGTCGGGCCGAGGCAAGCTTATTGATTGGCCCTGCAGGGGATTAGGTCATCGCTAGCAGGTTCGGGCGGC	174	1	y	3.9e-05	+ +++++++++
chr18:38992895-38993322	301	CGCAGAGGAGGCGGGGAGGCGGTGGCCCGGCTGGTTCGCTTCCAGGCTCCGCCAAGGGTCCGCCGCCGCGCTTTC	304	2	y	2.3e-06	++++++++++++
chr18:80151027-80152060	76	tccccgtcccctgtccccgcccttcccccccccccAGAACGGCCCCACTCCCACGTGACCCGCGAGCGGGCGCGG	89	2	n	1.6e-06	++++++++ ++++
chr18:80151027-80152060	226	TGGGGACAGCGCAGCGGACAGCGCTAGGGACGTCGGGGCGGACCCAGGAGTGGACGGCGGGTGGGTCGCGGGGAG	256	2	y	5.2e-05	+ +++++++ +
chr18:80151027-80152060	376	CAACACCGCCGCGTCCTCCGCCTACGCGGCGGGACCCCCGCCCCGCGCCCGTCCCTCCTCCCGCGCGCCAGAAAG	390	2	n	7.1e-05	+ ++++++++ +
chr18:80151027-80152060	376	CAACACCGCCGCGTCCTCCGCCTACGCGGCGGGACCCCCGCCCCGCGCCCGTCCCTCCTCCCGCGCGCCAGAAAG	410	2	n	2.8e-05	+++++++++ + +
chr18:80151027-80152060	376	CAACACCGCCGCGTCCTCCGCCTACGCGGCGGGACCCCCGCCCCGCGCCCGTCCCTCCTCCCGCGCGCCAGAAAG	426	2	n	7.1e-05	+++++ ++++++ +
chr18:80151027-80152060	451	AGAAGATGGCGCTCAGCTGCCTCAGGAAGTGACGTCGCCTCATTTGCATGCCGACGAGGCCAGCCAATGGGTGTA	511	1	n	4.9e-05	++++++++ ++ +
chr18:80151027-80152060	601	TGGAGGGGGTGGGGCCTACCGCAGCCCCCTCCCCTGGACCCCCTGGGTCTAGAGCCTTCGCCCCCTCTGGGCAAG	602	2	y	5.6e-07	++++++++ +++++
chr18:80151027-80152060	676	CTCTCGAGAGAGAGTTTAAGGAGGTGGTGACGTCATTGAAGGGGTGGGGCGAGGCCGTCATCGACCACATGACCA ATCACATGAGTCCACCAGAGCTCTGACTTCTTTTGCATGGAATGGGGGTGGAGCCAGTGGAAGCCAAGTGGGTGG CCCCGCCCATACCTACAAGCCAATAAGAAGCCAGCCCTGAGGATACTGGCTTGCTATTGGAGGATAGGACTTAAA	712	2	y	1.1e-05	+++++++ +++++
chr18:80151027-80152060	676	CTCTCGAGAGAGAGTTTAAGGAGGTGGTGACGTCATTGAAGGGGTGGGGCGAGGCCGTCATCGACCACATGACCA ATCACATGAGTCCACCAGAGCTCTGACTTCTTTTGCATGGAATGGGGGTGGAGCCAGTGGAAGCCAAGTGGGTGG CCCCGCCCATACCTACAAGCCAATAAGAAGCCAGCCCTGAGGATACTGGCTTGCTATTGGAGGATAGGACTTAAA	745	1	n	1.4e-05	++++++++++ + +
chr18:80151027-80152060	676	CTCTCGAGAGAGAGTTTAAGGAGGTGGTGACGTCATTGAAGGGGTGGGGCGAGGCCGTCATCGACCACATGACCA ATCACATGAGTCCACCAGAGCTCTGACTTCTTTTGCATGGAATGGGGGTGGAGCCAGTGGAAGCCAAGTGGGTGG CCCCGCCCATACCTACAAGCCAATAAGAAGCCAGCCCTGAGGATACTGGCTTGCTATTGGAGGATAGGACTTAAA	791	2	y	2.4e-05	+++++ ++ ++
chr18:80151027-80152060	676	CTCTCGAGAGAGAGTTTAAGGAGGTGGTGACGTCATTGAAGGGGTGGGGCGAGGCCGTCATCGACCACATGACCA ATCACATGAGTCCACCAGAGCTCTGACTTCTTTTGCATGGAATGGGGGTGGAGCCAGTGGAAGCCAAGTGGGTGG CCCCGCCCATACCTACAAGCCAATAAGAAGCCAGCCCTGAGGATACTGGCTTGCTATTGGAGGATAGGACTTAAA	825	2	n	1.9e-07	+++++++++++ ++
chr18:80151027-80152060	676	CTCTCGAGAGAGAGTTTAAGGAGGTGGTGACGTCATTGAAGGGGTGGGGCGAGGCCGTCATCGACCACATGACCA ATCACATGAGTCCACCAGAGCTCTGACTTCTTTTGCATGGAATGGGGGTGGAGCCAGTGGAAGCCAAGTGGGTGG CCCCGCCCATACCTACAAGCCAATAAGAAGCCAGCCCTGAGGATACTGGCTTGCTATTGGAGGATAGGACTTAAA	842	1	n	2.4e-06	+++++++ +++++
chr18:80151027-80152060	901	CTCTAGGAACTTGGACCAGTGTGCCTATGATTGACAGATCTTGGTGAGCCAACCGGATAGGATCTCCTGAGTCAT	926	3	y	1.7e-06	++++++++++ +
chr8:69749613-69750194	1	ACAACACAAAAACCACTTCGTGGCCGTGACGTCACCGACACGGAGGGCGGGGCCTCCCCTGCGGCGCCCTGAGCT	40	2	y	6.6e-07	++ +++++++++
chr8:69749613-69750194	76	CTGCGCAGACGCGGCCGAAGGGCGGAGCGACACAGCCGCAGCGACCTAGTCGCCGCCAACCGCAGCGGGCCTAAC	90	2	y	5.3e-06	++ ++++++ ++
chr8:69749613-69750194	301	GCCACGGAGTTCAGTCTACAACACGGCGGACAGAGAAAATCCGCCTCCCACTGCCCTACCTCGCTCTTGATTGAG	338	2	n	9.9e-05	+++++++++ +
chr8:69749613-69750194	376	TGGTGTAAGCTTGAAGGCCCTGATTGGCTAGGTCCGCCCAGCGACTGCTGATTGACAGCAGGAGCTGAAGTGATG	392	1	y	8.3e-06	+ +++++++++++
chr8:69749613-69750194	376	TGGTGTAAGCTTGAAGGCCCTGATTGGCTAGGTCCGCCCAGCGACTGCTGATTGACAGCAGGAGCTGAAGTGATG	422	3	y	8.3e-07	+++++++++++
chr11:115933479-115933789	1	AAGACCTTACTTCCGTCCCGTGCTGATGACGTTTCCAAGAGCTGAGCATGGGGGCGGAGCCATGCCCAGACACAG	47	2	y	1.6e-06	++++++++ ++
chr11:115933479-115933789	76	CCCTTTTGATTGGTTGTCATTCGGGCGCGGAGTCTCCTGGGATCCGGAAGAAGTTGGTTTTCTCGCCCCTAAATT	78	1	y	1.2e-07	+++ ++++++++++
chr11:115933479-115933789	226	TCTTGCAATTTATGCGGAATATTCAGACCCTGAATCTGATGGCGAAACTGGAGTCGACGCTGTAGGCGGAGCGAC	284	2	y	5.9e-06	+ ++++++++ ++
chr7:143829625-143830336	376	AGTCAGACCGCCGACCCCAGGGGCGTGGGCGGGGCGTGGGTGGGGCGGGGCCCGTCCTGCTGTCAATCTCAAGAC	397	2	y	1.9e-07	++ +++++++++++
chr7:143829625-143830336	376	AGTCAGACCGCCGACCCCAGGGGCGTGGGCGGGGCGTGGGTGGGGCGGGGCCCGTCCTGCTGTCAATCTCAAGAC	413	2	y	4.8e-07	+++ ++++++++++
chr7:143829625-143830336	376	AGTCAGACCGCCGACCCCAGGGGCGTGGGCGGGGCGTGGGTGGGGCGGGGCCCGTCCTGCTGTCAATCTCAAGAC	433	3	n	5.6e-06	++++++++++ +
chr7:143829625-143830336	451	TGCCGCCGCCGACTGGCGGGCCTGGTGGGCTCTGAGTCAGCTCACTGCCTTCACCAATCACAGGACGCAGCTCGC	501	1	n	2.8e-05	+ ++++++++ +++
chr7:143829625-143830336	526	GAAATCCACTTCCGATTGGTCGTCTGTGACCTCACATCATCTGGGGCGGAGCTTCAGGCAGGCACTTAGAACACT	534	1	y	2.4e-06	++++++++++++++
chr7:143829625-143830336	526	GAAATCCACTTCCGATTGGTCGTCTGTGACCTCACATCATCTGGGGCGGAGCTTCAGGCAGGCACTTAGAACACT	564	2	y	3.8e-05	+++++++ ++
chr7:45916638-45916994	1	CTACCAGGCCCTGCGCTGACAGGGTCCCAAGCTCCGCCTCCTCCGTGGCAAACTGTCAGTTGTGGCAACTGCATC	31	2	n	4.8e-07	++ +++++++++++
chr7:45916638-45916994	151	GAGTAGCCAATCGGGGCTGCTGGCAGTTGCTAGGCAGCCTCCTGAGGCCAACCAATCAAAGCCGTTTATTTCAAC	154	1	n	2.1e-05	+++++++++++ +
chr7:45916638-45916994	151	GAGTAGCCAATCGGGGCTGCTGGCAGTTGCTAGGCAGCCTCCTGAGGCCAACCAATCAAAGCCGTTTATTTCAAC	199	1	n	5.3e-07	++++++++++ ++
chr7:45916638-45916994	226	TTGTTATTTTATTTCTTAGACCCGCCTCTGGCGGGAACCTCACCAAGGTCGCTGGAGGAGGCGGGACTTGGGGAG	244	2	n	2.8e-05	+ +++++++++ +
chr7:45916638-45916994	226	TTGTTATTTTATTTCTTAGACCCGCCTCTGGCGGGAACCTCACCAAGGTCGCTGGAGGAGGCGGGACTTGGGGAG	279	2	y	1.3e-07	++++++++++++++
chr14:45329597-45330034	76	TCTGCCGCTCTAGGTGACTGACTTCGGCGCCCGGAGCCAGAGGCGGGCCAGCCGGAAGGGGCGGAGCCAGTCACG	111	2	y	1.3e-05	+ +++++++++ +
chr14:45329597-45330034	76	TCTGCCGCTCTAGGTGACTGACTTCGGCGCCCGGAGCCAGAGGCGGGCCAGCCGGAAGGGGCGGAGCCAGTCACG	129	2	y	2.3e-07	+++++++++++ ++
chr14:45329597-45330034	151	GTcccgccccaggccgcctctgcgccctcgccccgccccctcccccgcccGGGCTGCCATGGCCCTTCCCGGCAT	151	2	n	7.9e-06	++++++++++ +
chr14:45329597-45330034	151	GTcccgccccaggccgcctctgcgccctcgccccgccccctcccccgcccGGGCTGCCATGGCCCTTCCCGGCAT	180	2	n	1.1e-09	++++++++++++++
chr14:45329597-45330034	301	AGAGCACAAGGAGATTGACGGCCGTCTTAAGGAGCGTGAGTGAGCCTTGACACACTCTCTAGTGCCTGGACCGGC	310	3	y	1.7e-05	+ +++++++ +++
chr6:87850993-87851361	1	CCTTGCCTGCGCCACACGCGGGTCTGCACACGGCCCCACACACGCCGCTGCGCACGGCTCTCCTCCGCCTCGCCC	62	2	n	8.4e-05	+ +++++++ +++
chr6:87850993-87851361	76	ACGGATCCAATCAGCGCAGGAAGCCAGGCCAGCCAATCAGAATCGCCCGCTGGGAGCGCGGCCTCGCGCGAGGGC	79	1	n	2.6e-05	+ ++++++++ +
chr6:87850993-87851361	76	ACGGATCCAATCAGCGCAGGAAGCCAGGCCAGCCAATCAGAATCGCCCGCTGGGAGCGCGGCCTCGCGCGAGGGC	105	1	n	2.1e-07	+++++++++++++
chr6:87850993-87851361	151	GGCAGGGGCGGGGCGGACTGCTCCACGCCCAGCCTCTTCCGGCCCGCAGCGCTCGCGGCCTTCCCGCCCGTACCT	151	2	y	1.5e-07	++ +++++++++++
chr6:87850993-87851361	151	GGCAGGGGCGGGGCGGACTGCTCCACGCCCAGCCTCTTCCGGCCCGCAGCGCTCGCGGCCTTCCCGCCCGTACCT	211	2	n	5.2e-05	++++++++ + ++
chr8:69996246-69996858	151	ACAGACAGTTATCAGCAGCCAATGAGCGCGTTGGCCGGCTGGCCCTCCGGATCGCTCCGGTGGCTGGGACGGGCC TAGGGGGCGGGACAGGATGACTGACAGACGAGCATCCAATGGGAGAATGGAGCGGGTTCCAGAGCCAGTCAACTC	166	1	n	5.6e-06	++++++++ ++ +
chr8:69996246-69996858	151	ACAGACAGTTATCAGCAGCCAATGAGCGCGTTGGCCGGCTGGCCCTCCGGATCGCTCCGGTGGCTGGGACGGGCC TAGGGGGCGGGACAGGATGACTGACAGACGAGCATCCAATGGGAGAATGGAGCGGGTTCCAGAGCCAGTCAACTC	225	2	y	4e-07	++++++++++++
chr8:69996246-69996858	151	ACAGACAGTTATCAGCAGCCAATGAGCGCGTTGGCCGGCTGGCCCTCCGGATCGCTCCGGTGGCTGGGACGGGCC TAGGGGGCGGGACAGGATGACTGACAGACGAGCATCCAATGGGAGAATGGAGCGGGTTCCAGAGCCAGTCAACTC	241	3	y	1.9e-06	++++++++++ +
chr8:69996246-69996858	151	ACAGACAGTTATCAGCAGCCAATGAGCGCGTTGGCCGGCTGGCCCTCCGGATCGCTCCGGTGGCTGGGACGGGCC TAGGGGGCGGGACAGGATGACTGACAGACGAGCATCCAATGGGAGAATGGAGCGGGTTCCAGAGCCAGTCAACTC	258	1	n	2.1e-05	++ +++++ ++++
chr8:69996246-69996858	301	GCCATCGGGGAGGGATTTAGGTTTGGGGCGGGAATGCCGTGAGGGGTGCGGTCTTGGAGGACACGTCAATTCGTG	321	2	y	2.6e-05	+ +++++++++
chr8:69996246-69996858	451	CCCGCTGTGCTCAGCAGGGGCGCCCCACCCACAATGCGCCGGAGGCTGTCGGGCCTGGACAGGCGCCTCTGAGTA	472	2	n	1.9e-05	+++++ +++++
chr17:17004691-17005201	1	TTGAGTCCTGGCTCTTGAGAACAAGGTCACAGCCCACAAAGGGGAGGAGCAGGCAGCCAATCAGAGGTGAGCTGG	37	2	y	8.8e-05	++++++ ++ ++
chr17:17004691-17005201	1	TTGAGTCCTGGCTCTTGAGAACAAGGTCACAGCCCACAAAGGGGAGGAGCAGGCAGCCAATCAGAGGTGAGCTGG	54	1	n	6.8e-08	++++++++++++++
chr17:17004691-17005201	226	CGCACACTCTCACCCTGAGAGAGTTGCTCCTGTCACTCAGGATTTACTGGCCAATCACGGCATTGAGGAGGATCT	253	3	n	1.3e-06	+++++++ +++ +
chr17:17004691-17005201	226	CGCACACTCTCACCCTGAGAGAGTTGCTCCTGTCACTCAGGATTTACTGGCCAATCACGGCATTGAGGAGGATCT	273	1	n	4.2e-05	++++++++++ +
chr17:17004691-17005201	301	GCCAGTCGTAAGAGGAGGGTGGTTTTTCCGGATGCATTTTGCTGGTTCCCCGTGAGATCTGCCAGTCAAAAGCGG	357	3	n	1.3e-05	+ +++ +++++++
chr17:17004691-17005201	376	GGGGTGGTTCTACCGGAACGCATTTTCCTGGTTCTCTGTGGGATCTGCCAGTCATAAGAGGTGGGTGTTTCTTCC	418	3	n	2.4e-05	+ +++ ++++++
chr11:23007619-23008564	76	ACAAGCTACCACATCTCACTCACTGGTCTGAGTGACAGACACTTCCTATGTCTAGTGTCTTACTGGTCAGTCGAG	102	3	y	2.8e-06	+++ ++++++ +
chr11:23007619-23008564	151	AAAAAAGAGGGTGGGACAAATAAGTATTCTCCTTCTGATTGGTCAACCCGCTGGTTCTTGTCAATTAGAGATGAA	154	2	y	1.4e-05	++ +++ +++++
chr11:23007619-23008564	151	AAAAAAGAGGGTGGGACAAATAAGTATTCTCCTTCTGATTGGTCAACCCGCTGGTTCTTGTCAATTAGAGATGAA	182	1	y	2.7e-07	++++++++++++++
chr11:23007619-23008564	301	CTTCCTGTCCCTCTGTGCCCTAATATGTTGATCCAGCTAGTTAAAACGCGCTTTCTGCTTTAAGTCCGTATACCG	303	3	n	6.8e-05	++++++ ++
chr11:23007619-23008564	451	CCTGGGTGTCATTCAAGTGAATCAGTAATTGTTCCGGCGCTGGTGAGACTCCCATTGAGCAATTAGCTTGAAGAT	454	3	n	4.2e-05	++ +++++ +++++
chr11:23007619-23008564	751	CTGTGAGCTAGGTGGCAGCGCCTGCACGCCGCCCTGGGCGGGCGCGGGCGCTTGGGCTTGGAGGCGGGGCGATGG	807	2	y	1.6e-06	+++++++++++
chr8:76901996-76902271	1	TGCGGCTTTAAGGAAGCTGCGGAGTCCAGGCTGTGTCGCAGCAACTTTGTATCAGTCATGTCGCCCGCCTGGTGA CTGACAGCCCCTGTTGCCCAATGAGAAGCGCGCCTGGCCCGCACAGCGTGGAGCCTTGTTTCCCCCTTGGCCAAT GGAAATGGCTCCAGCGGGCGGGACAGCGACCTGAACTTTCTGGACATGTGACCCGGTTTAAAAGGGCCGGCTTTC	71	3	y	3e-07	+++++++++++++
chr8:76901996-76902271	1	TGCGGCTTTAAGGAAGCTGCGGAGTCCAGGCTGTGTCGCAGCAACTTTGTATCAGTCATGTCGCCCGCCTGGTGA CTGACAGCCCCTGTTGCCCAATGAGAAGCGCGCCTGGCCCGCACAGCGTGGAGCCTTGTTTCCCCCTTGGCCAAT GGAAATGGCTCCAGCGGGCGGGACAGCGACCTGAACTTTCTGGACATGTGACCCGGTTTAAAAGGGCCGGCTTTC	90	1	n	5.3e-05	++ +++++ +++++
chr8:76901996-76902271	1	TGCGGCTTTAAGGAAGCTGCGGAGTCCAGGCTGTGTCGCAGCAACTTTGTATCAGTCATGTCGCCCGCCTGGTGA CTGACAGCCCCTGTTGCCCAATGAGAAGCGCGCCTGGCCCGCACAGCGTGGAGCCTTGTTTCCCCCTTGGCCAAT GGAAATGGCTCCAGCGGGCGGGACAGCGACCTGAACTTTCTGGACATGTGACCCGGTTTAAAAGGGCCGGCTTTC	143	1	n	2.3e-05	++++++++ + ++
chr8:76901996-76902271	1	TGCGGCTTTAAGGAAGCTGCGGAGTCCAGGCTGTGTCGCAGCAACTTTGTATCAGTCATGTCGCCCGCCTGGTGA CTGACAGCCCCTGTTGCCCAATGAGAAGCGCGCCTGGCCCGCACAGCGTGGAGCCTTGTTTCCCCCTTGGCCAAT GGAAATGGCTCCAGCGGGCGGGACAGCGACCTGAACTTTCTGGACATGTGACCCGGTTTAAAAGGGCCGGCTTTC	161	2	y	1.6e-05	++ +++++++++
chr8:76901996-76902271	226	CACTCCCCCCTCGGGGCTTTCGCCCGCCCCCTCCTCTTGGCCCGCCCCGG	246	2	n	7.9e-06	++++++++++++
chr1:184034187-184034566	1	CGGGCTAGCACTTTTAAGTTTTTGATTGGTTGCCAATGACATCACCACCCGCGCGTTCTAACACACCAAACCCAC	19	1	y	2.1e-07	++ ++++++++++
chr1:184034187-184034566	76	TAGCGGGTCCGAGCCGGCCTCCCTCCCAAGGCGAGGCCTCGCCCCTTTCTCCGCCCTCCTCGGCTTCTTATTGGT CAGAGACCACTGTGATGTAGCGGGCGGCAGCCTCTGGGTCTTCATTGGCGTATCGCGCCGTCGCTCGGAGGCAAC CCCGCCCCCTCCAAAGCTTACATTTACGCTGTAGCAAAAGAGAAAGTAACTCTGTGTTGCTGCTGGGGATCAATG	123	2	n	7.2e-06	+ ++++++ ++ +
chr1:184034187-184034566	76	TAGCGGGTCCGAGCCGGCCTCCCTCCCAAGGCGAGGCCTCGCCCCTTTCTCCGCCCTCCTCGGCTTCTTATTGGT CAGAGACCACTGTGATGTAGCGGGCGGCAGCCTCTGGGTCTTCATTGGCGTATCGCGCCGTCGCTCGGAGGCAAC CCCGCCCCCTCCAAAGCTTACATTTACGCTGTAGCAAAAGAGAAAGTAACTCTGTGTTGCTGCTGGGGATCAATG	139	1	y	1.9e-06	+++++ ++++++++
chr1:184034187-184034566	76	TAGCGGGTCCGAGCCGGCCTCCCTCCCAAGGCGAGGCCTCGCCCCTTTCTCCGCCCTCCTCGGCTTCTTATTGGT CAGAGACCACTGTGATGTAGCGGGCGGCAGCCTCTGGGTCTTCATTGGCGTATCGCGCCGTCGCTCGGAGGCAAC CCCGCCCCCTCCAAAGCTTACATTTACGCTGTAGCAAAAGAGAAAGTAACTCTGTGTTGCTGCTGGGGATCAATG	224	2	n	1.5e-07	+++++++++++++
chr15:82146919-82147425	76	GCCAGAAGAAGGCTGGGACGAGGACCCGGCGGCTACTCTCCGCTGGCGCTTGGATGCCGTGAGGGGCGGAGTCCC	134	2	y	1.1e-05	+ +++++++++ +
chr15:82146919-82147425	151	GCTATGCAAATCTGAGCTGCTGATCGATGACGCACCATCACCCCATGAGCCGCTTCGCGCGCCGATTGGCTAATG	209	1	y	5.6e-06	+ +++++++++++
chr15:82146919-82147425	226	CAAGCCTGGTCCCATTGACAACAAACTTGGGGGTGCGGAGGCTCGGGGCGGGGCTGCAGTgggcgcggcccgggg cgggggAATTCTGCCCCGCCCCTTCCGTGGAGTCGGGGCGCAGCTCAAACATGGCGGCGGTTGGCACGGGGCGGT	266	2	y	3.4e-06	+ ++++++++++
chr15:82146919-82147425	226	CAAGCCTGGTCCCATTGACAACAAACTTGGGGGTGCGGAGGCTCGGGGCGGGGCTGCAGTgggcgcggcccgggg cgggggAATTCTGCCCCGCCCCTTCCGTGGAGTCGGGGCGCAGCTCAAACATGGCGGCGGTTGGCACGGGGCGGT	293	2	y	5.2e-05	+ +++++++++
chr15:82146919-82147425	226	CAAGCCTGGTCCCATTGACAACAAACTTGGGGGTGCGGAGGCTCGGGGCGGGGCTGCAGTgggcgcggcccgggg cgggggAATTCTGCCCCGCCCCTTCCGTGGAGTCGGGGCGCAGCTCAAACATGGCGGCGGTTGGCACGGGGCGGT	313	2	n	4.5e-09	++++++++++++++
chr13:91460718-91461290	1	AGGCCGCACTTTCCCCTCCTCCCCGCGCCTTCTCTCCAGTGAGGAgccgggcgcgggcggcgcggggggcggggc	62	2	y	2.2e-08	+ ++++++++++++
chr13:91460718-91461290	76	ggcggcggAGGGAACAGCCAGTTGTTTAAAATCCTTCTAGAGCAGTTTCTAATTCCCCCCTAGCGCCCGGGTTCG GAGGgggaggggggaaggagagcgggagggggagcgcggcggagagggaaggagggagggagggagggagcggga	150	2	y	7.9e-05	++++++++ ++++
chr13:91460718-91461290	301	GAGGCCTGTCAGTCTCGCGCGTTGCCAGGGCGAGGAGGGCGGAGCTCTGGCGTGGGGCGGCCAATGGTGGGGGTG	304	3	n	1.7e-06	+++++++++++ ++
chr13:91460718-91461290	301	GAGGCCTGTCAGTCTCGCGCGTTGCCAGGGCGAGGAGGGCGGAGCTCTGGCGTGGGGCGGCCAATGGTGGGGGTG	332	2	y	1e-06	+ ++ ++++++ ++
chr6:37870545-37870964	1	GAACCCGATGCCTGCTCTGGCTCCTTAACAAATGATTCCTTTACAATCTACAGAAGAGAGACACACACACAGCGA GCCAATCAGCGGCCGCGGTCCTCGCGTCCGGCGGGGCTAGCCCCGCCCACTCCCAACCTCCCGCGGGGGCCGTCC	74	1	n	4.2e-06	++++++++++ ++
chr6:37870545-37870964	1	GAACCCGATGCCTGCTCTGGCTCCTTAACAAATGATTCCTTTACAATCTACAGAAGAGAGACACACACACAGCGA GCCAATCAGCGGCCGCGGTCCTCGCGTCCGGCGGGGCTAGCCCCGCCCACTCCCAACCTCCCGCGGGGGCCGTCC	115	2	n	7.9e-09	++++++++++++++
chr6:37870545-37870964	151	GAGCCTCGCGGGCTTCTGCAGACCCCGCCCCCTGGGCAGGCGCGGCGGTCATTGGATGGCGCTCGGCTCGCAGTC	172	2	n	1.2e-06	+++++++++++
chr6:37870545-37870964	151	GAGCCTCGCGGGCTTCTGCAGACCCCGCCCCCTGGGCAGGCGCGGCGGTCATTGGATGGCGCTCGGCTCGCAGTC	195	1	y	4.9e-05	+ + +++++ ++
chr6:37870545-37870964	226	GCCGCGGTTGCTGGGAGAGGGAGGTGGGGGCGGGGCCCGCGGTGGTCCAAGGGGCCCGAGAGAAAGGCTGCTAGG	248	2	y	1.3e-08	++ +++++++++++
chr6:37870545-37870964	301	CACGGGCGGGCGCGCTGGGCGGAATCGAGCGTCTCGGTGGCGGTTTGCCTATCGGCCCGCGCGGCGGCGTCGCGG	312	2	y	8.4e-05	+ + +++++++ +
chr15:82354195-82354601	1	AGCTTGGCGCAGGCCGGTGGCCGCGGCCGCCATCTTGCCGAGGAAGCCCCGCCCCTTCAGCGTGCGCACGCGCGG	46	2	n	5.6e-07	+++++++++++++
chr15:82354195-82354601	76	TGCCACGGGACTCGCTGCCGTGCCTCCTGCAGTGCAGAGGGAAGGACTGACTGGACTAGGGCTCTCTGATTGGCT GGAAGCCTCGGGCTCTGCAATGCGCATGCTCTACCGCGGAAACACCGATCCGGGGTTGGCTCGTTCAACGGCGGC	138	1	y	1.2e-07	+++++++++++++
chr3:96601008-96601209	1	TCCTCCCTCTCCACCAGTGATTGGCATGGCATCTGGTTCGTCCCGCCCGCTCTTGACTGACAGCTGGATCCCGGC ACCGCCCTCAATCCCCTGGCTCTTGCTCACTGGGGTAGCTGGGACCGTTAGCTCGCCAGGCTGGCAGGCTCCGGG	16	3	y	7.7e-05	+++++++ ++ +
chr3:96601008-96601209	1	TCCTCCCTCTCCACCAGTGATTGGCATGGCATCTGGTTCGTCCCGCCCGCTCTTGACTGACAGCTGGATCCCGGC ACCGCCCTCAATCCCCTGGCTCTTGCTCACTGGGGTAGCTGGGACCGTTAGCTCGCCAGGCTGGCAGGCTCCGGG	52	3	y	8.1e-08	++++++++++++++
chr3:96601008-96601209	1	TCCTCCCTCTCCACCAGTGATTGGCATGGCATCTGGTTCGTCCCGCCCGCTCTTGACTGACAGCTGGATCCCGGC ACCGCCCTCAATCCCCTGGCTCTTGCTCACTGGGGTAGCTGGGACCGTTAGCTCGCCAGGCTGGCAGGCTCCGGG	74	2	n	9.9e-05	++ ++++++ +
chr9:113930699-113931260	76	AAAAGCCGACGAAAGGGTATTTCCCAGAACCGACGGAAGTAGGACCTGGAACCACTTCCTCCAGTGCGGGCCAAT GAGCTCTTACTTATGGCAGTCAATTTAGTCCCGGAGGGGAAGAGCGTTTTGATTGGTGGCTCAGCCGGGAACGCA	143	1	n	8.6e-05	+++++++ ++
chr9:113930699-113931260	76	AAAAGCCGACGAAAGGGTATTTCCCAGAACCGACGGAAGTAGGACCTGGAACCACTTCCTCCAGTGCGGGCCAAT GAGCTCTTACTTATGGCAGTCAATTTAGTCCCGGAGGGGAAGAGCGTTTTGATTGGTGGCTCAGCCGGGAACGCA	196	1	y	2.1e-05	++ ++++++++ +
chr9:113930699-113931260	226	GAGGCTCACGGGAATCCATTCCGGCCGCTTCGCCGTGACTGCCCAGAAGACCTGTCAGTCAGCCGAGCGTAACCG	275	3	n	6.5e-07	++++++++++++
chr9:113930699-113931260	376	CCgcgaggcgcggggccgcgaggggcgggcctgggaggggagcggccgcaggggcggggccggaggaggaggcgg aagcggCGAGCGAGCCCAAGCCGGAGCCGCATCGAAGCTGCGTCCGGGCCGGCggagcggcggcggcggggttgg	393	2	y	1.8e-06	+ ++++++++++ +
chr9:113930699-113931260	376	CCgcgaggcgcggggccgcgaggggcgggcctgggaggggagcggccgcaggggcggggccggaggaggaggcgg aagcggCGAGCGAGCCCAAGCCGGAGCCGCATCGAAGCTGCGTCCGGGCCGGCggagcggcggcggcggggttgg	422	2	y	4.8e-07	+ +++++++++++
chr9:113930699-113931260	376	CCgcgaggcgcggggccgcgaggggcgggcctgggaggggagcggccgcaggggcggggccggaggaggaggcgg aagcggCGAGCGAGCCCAAGCCGGAGCCGCATCGAAGCTGCGTCCGGGCCGGCggagcggcggcggcggggttgg	440	2	y	2.3e-05	+++++++++++ +
chr8:46551784-46552176	1	GGGTCCACCCACACCCACACCAGCTCCGGGTCATTTACCCGCCCACGAGGCCGGGGAGTTCTAAATTTACGGAAC	2	2	n	5.2e-05	+ ++ +++++ ++
chr8:46551784-46552176	1	GGGTCCACCCACACCCACACCAGCTCCGGGTCATTTACCCGCCCACGAGGCCGGGGAGTTCTAAATTTACGGAAC	36	2	n	8.4e-05	+++++++++
chr8:46551784-46552176	76	GGAGCGAGAGCGGGAGAGACAGCCTGCAGCAGCTAAGCCGGTTGCTTTGGACTCCGCTCCGCTGTTGGGTGTTTT	86	3	y	6.8e-05	++ ++ +++++++
chr8:46551784-46552176	151	CCAGGCCTGGATTTCATCGTGCTCTCGCCCAGGACGCTCTCTGGCCCCGCCCCGGAAAAGGCGGAGCATAGCGAG	204	2	y	2.6e-06	++++ ++++++ ++
chr8:46551784-46552176	226	GACTAGGCTCTGATTGGCTGTTCAGAGCAAGACCGGCTAGGCGCGAGTTTGGAGTCCCTGCCTTTGGGAACGGTA	232	1	y	1.2e-07	+++++++++++++
chr4:8647137-8647782	1	CTCGCCCGCACCATTTTGACCCGGCAAAGGCGGAACCTACGACGTGCAGCATTCTGGACGCCTCCGCCAATCACA GGGACCGGCCGGCTGCGGAAGCCGGGCCTCCTCAGGCTGCCCGGGCCGCCCGCTCGCTCGGAGCGCACGTCGCGG	23	2	y	1.8e-05	++ + ++++++ ++
chr4:8647137-8647782	1	CTCGCCCGCACCATTTTGACCCGGCAAAGGCGGAACCTACGACGTGCAGCATTCTGGACGCCTCCGCCAATCACA GGGACCGGCCGGCTGCGGAAGCCGGGCCTCCTCAGGCTGCCCGGGCCGCCCGCTCGCTCGGAGCGCACGTCGCGG	64	1	n	3e-05	+ ++++++++ +++
chr4:8647137-8647782	301	ACGAGGGTCGCGGACGCTTccccgcggggccgcgccgcgcgTGTCCGCACCGCTTCCTGCGCGCGCCCTGGGGCG GGGCTATGCGAAGCTAGCCAATCAGCGATGGGCATCCTGGATCCGCCCCCCCCGAGCCCTGGGGAGGGCGGGGCC	366	2	y	7.2e-06	++++++++++
chr4:8647137-8647782	301	ACGAGGGTCGCGGACGCTTccccgcggggccgcgccgcgcgTGTCCGCACCGCTTCCTGCGCGCGCCCTGGGGCG GGGCTATGCGAAGCTAGCCAATCAGCGATGGGCATCCTGGATCCGCCCCCCCCGAGCCCTGGGGAGGGCGGGGCC	390	1	n	1.4e-06	+++++++++++ +
chr4:8647137-8647782	301	ACGAGGGTCGCGGACGCTTccccgcggggccgcgccgcgcgTGTCCGCACCGCTTCCTGCGCGCGCCCTGGGGCG GGGCTATGCGAAGCTAGCCAATCAGCGATGGGCATCCTGGATCCGCCCCCCCCGAGCCCTGGGGAGGGCGGGGCC	415	2	n	7.9e-06	+ +++++++++++
chr4:8647137-8647782	301	ACGAGGGTCGCGGACGCTTccccgcggggccgcgccgcgcgTGTCCGCACCGCTTCCTGCGCGCGCCCTGGGGCG GGGCTATGCGAAGCTAGCCAATCAGCGATGGGCATCCTGGATCCGCCCCCCCCGAGCCCTGGGGAGGGCGGGGCC	436	2	y	2.7e-08	++++ +++++++++
chr4:8647137-8647782	451	GTGGGAAGGGCGGGGCGTGGGGGACCTGCTAGCGGAGGTGGGGAATGGGCTGGGAGGAGCCAGTGGTGCGGGCCC	453	2	y	9.9e-08	++++ +++++++++
chr4:8647137-8647782	451	GTGGGAAGGGCGGGGCGTGGGGGACCTGCTAGCGGAGGTGGGGAATGGGCTGGGAGGAGCCAGTGGTGCGGGCCC	481	2	y	5.6e-05	+ +++++ ++++
chr11:60210379-60210697	76	CCGATCGCCTCCGTGCCCCGCCCCTCGGGTGAGCGCACATGGCCAATCAGCAGCCGCGCCGCGCCCCATTAGGGC CCCGCCCACCCCCGACGGCGGCAGCTCGGGTTTCTCCCGGTGCTCTGAATGGGGCCGGGGTTACTAGCGGGCGTC	90	2	n	2.8e-07	++++++++++++
chr11:60210379-60210697	76	CCGATCGCCTCCGTGCCCCGCCCCTCGGGTGAGCGCACATGGCCAATCAGCAGCCGCGCCGCGCCCCATTAGGGC CCCGCCCACCCCCGACGGCGGCAGCTCGGGTTTCTCCCGGTGCTCTGAATGGGGCCGGGGTTACTAGCGGGCGTC	115	1	n	2.8e-06	+++++++++++ ++
chr11:60210379-60210697	76	CCGATCGCCTCCGTGCCCCGCCCCTCGGGTGAGCGCACATGGCCAATCAGCAGCCGCGCCGCGCCCCATTAGGGC CCCGCCCACCCCCGACGGCGGCAGCTCGGGTTTCTCCCGGTGCTCTGAATGGGGCCGGGGTTACTAGCGGGCGTC	149	2	n	2.2e-08	++++++++++++++
chr1:52233124-52233611	76	CCGCCGCGAGCTCCGCACTGAGACTGACGCTCAAGGGAGGGCTGGAGACATACCAGGCTCACCAACCGGGGGCGG GAGGACGCTGACGGCCTGCCCCCTGCAAGCTCTTCCATTGGCTCAGCCTGCCGACCTCTCTTCTGATTGGCTAGA	140	2	y	3.1e-05	++++++++++
chr1:52233124-52233611	76	CCGCCGCGAGCTCCGCACTGAGACTGACGCTCAAGGGAGGGCTGGAGACATACCAGGCTCACCAACCGGGGGCGG GAGGACGCTGACGGCCTGCCCCCTGCAAGCTCTTCCATTGGCTCAGCCTGCCGACCTCTCTTCTGATTGGCTAGA	181	1	y	1.9e-05	++ + +++++++
chr1:52233124-52233611	76	CCGCCGCGAGCTCCGCACTGAGACTGACGCTCAAGGGAGGGCTGGAGACATACCAGGCTCACCAACCGGGGGCGG GAGGACGCTGACGGCCTGCCCCCTGCAAGCTCTTCCATTGGCTCAGCCTGCCGACCTCTCTTCTGATTGGCTAGA	210	1	y	9.3e-09	++++++++++++++
chr1:52233124-52233611	226	GAATCGGTCAAATTTGTCTCCGCGCCCGTACGCAGTCCCGCTGGGTCCTGGAGGGCGGGGAGAAGGACGACTGAC	273	2	y	5.3e-06	++ ++++++++
chr10:75773378-75773702	1	GAGCCAGTAGAGGTTCCAGAAAAGGAGCgcggggaggggcggggaggaggcggggccagggaggcggggccgggg	43	2	y	2.2e-08	++++++++++++++
chr10:75773378-75773702	1	GAGCCAGTAGAGGTTCCAGAAAAGGAGCgcggggaggggcggggaggaggcggggccagggaggcggggccgggg	57	2	y	4e-07	++++++++++++
chr10:75773378-75773702	76	agggAGAGCACAGCTCTGTTTCTCATTGGCCAGGCAGACTCGGCCCTTCTAGATTGGCTATCAGAGATACGCCTC	94	1	y	2.4e-06	++++ ++++++++
chr12:108275443-108275781	1	ccgggcggagagggggcggggcgccgccgTTGGGCCACGCCTCCGAAAGGGAGGCGGTCAGAGGAGTGGCAGGCC	9	2	y	2.2e-08	+++++++++++++
chr12:108275443-108275781	76	CCCGAGGTCCCCCTACGCGGTgcgccggcccgccgggcgcccTGCCAGAGGCGCGCTCGAGCCACGGTCCCGCCC TCCCACAGGTCTGATTGGCCAGGTTCGGGGGTGTGCGGGAGGGGCGGGGCGCGCGCGGGGAGGCTGAAAAGATGG	142	2	n	3e-06	+++++++++ +++
chr12:108275443-108275781	76	CCCGAGGTCCCCCTACGCGGTgcgccggcccgccgggcgcccTGCCAGAGGCGCGCTCGAGCCACGGTCCCGCCC TCCCACAGGTCTGATTGGCCAGGTTCGGGGGTGTGCGGGAGGGGCGGGGCGCGCGCGGGGAGGCTGAAAAGATGG	158	1	y	2.6e-05	++++++++++++
chr12:108275443-108275781	76	CCCGAGGTCCCCCTACGCGGTgcgccggcccgccgggcgcccTGCCAGAGGCGCGCTCGAGCCACGGTCCCGCCC TCCCACAGGTCTGATTGGCCAGGTTCGGGGGTGTGCGGGAGGGGCGGGGCGCGCGCGGGGAGGCTGAAAAGATGG	187	2	y	1.4e-08	++++++++++++++
chr10:128704966-128705298	76	ACCCCGCCCCTCCTTCCCGCGTTTCCCTGGCCCCGCCCCCCGCCCTTCCGATTGGTTCACGTCACGAGGGCGGAC CGGACCATCGCGCTCCCGCCTCAGAGGCCCCGCCCTGGGCGGGCGAGCCGCGGGGCAGCTGCACAACTTTCCCGC	76	2	n	2.3e-06	++++++++++++
chr10:128704966-128705298	76	ACCCCGCCCCTCCTTCCCGCGTTTCCCTGGCCCCGCCCCCCGCCCTTCCGATTGGTTCACGTCACGAGGGCGGAC CGGACCATCGCGCTCCCGCCTCAGAGGCCCCGCCCTGGGCGGGCGAGCCGCGGGGCAGCTGCACAACTTTCCCGC	105	2	n	2.2e-08	++++++++++++ +
chr10:128704966-128705298	76	ACCCCGCCCCTCCTTCCCGCGTTTCCCTGGCCCCGCCCCCCGCCCTTCCGATTGGTTCACGTCACGAGGGCGGAC CGGACCATCGCGCTCCCGCCTCAGAGGCCCCGCCCTGGGCGGGCGAGCCGCGGGGCAGCTGCACAACTTTCCCGC	120	1	y	1.9e-06	+++++++++++++
chr10:128704966-128705298	76	ACCCCGCCCCTCCTTCCCGCGTTTCCCTGGCCCCGCCCCCCGCCCTTCCGATTGGTTCACGTCACGAGGGCGGAC CGGACCATCGCGCTCCCGCCTCAGAGGCCCCGCCCTGGGCGGGCGAGCCGCGGGGCAGCTGCACAACTTTCCCGC	138	2	y	3.1e-05	+ ++++++ +
chr10:128704966-128705298	76	ACCCCGCCCCTCCTTCCCGCGTTTCCCTGGCCCCGCCCCCCGCCCTTCCGATTGGTTCACGTCACGAGGGCGGAC CGGACCATCGCGCTCCCGCCTCAGAGGCCCCGCCCTGGGCGGGCGAGCCGCGGGGCAGCTGCACAACTTTCCCGC	177	2	n	1.2e-05	+++++++++ +
chr7:73537730-73538201	1	AGCAAGGATCCAAATCGGTCCGGAAAGAAGCCGCCCACCGGAAAGTCCCGACCAAAATTCCCTTCCTCTGCCCCG CCCCCGGCGCTAGCCGAGCCCATAGAGGAAGCAGCAGACCGACGCACGAGGCCACGCGTCACCGCGTTCTCCCGC CCACTCCGTCTGACGTCAAGGGGCGGGACCAGCCCGACGGCGCCACCGTTGACCCTGCTGTTACCAGGCGCTCAC	70	2	n	1.9e-07	+++++++++++ +
chr7:73537730-73538201	1	AGCAAGGATCCAAATCGGTCCGGAAAGAAGCCGCCCACCGGAAAGTCCCGACCAAAATTCCCTTCCTCTGCCCCG CCCCCGGCGCTAGCCGAGCCCATAGAGGAAGCAGCAGACCGACGCACGAGGCCACGCGTCACCGCGTTCTCCCGC CCACTCCGTCTGACGTCAAGGGGCGGGACCAGCCCGACGGCGCCACCGTTGACCCTGCTGTTACCAGGCGCTCAC	144	2	n	4.7e-06	+++++++++++++
chr7:73537730-73538201	1	AGCAAGGATCCAAATCGGTCCGGAAAGAAGCCGCCCACCGGAAAGTCCCGACCAAAATTCCCTTCCTCTGCCCCG CCCCCGGCGCTAGCCGAGCCCATAGAGGAAGCAGCAGACCGACGCACGAGGCCACGCGTCACCGCGTTCTCCCGC CCACTCCGTCTGACGTCAAGGGGCGGGACCAGCCCGACGGCGCCACCGTTGACCCTGCTGTTACCAGGCGCTCAC	166	2	y	3.4e-06	++++++++++++
chr7:73537730-73538201	226	ACAGCCAATCAGCACTCGCCGCAAGCGCCGGCCGGCCTTTGAACTCCGCACAGCAACTTCCTGCTGTTTGGCGAG	227	1	n	9.3e-07	+++++++++++ +
chr7:73537730-73538201	301	TACACAGTGCAATGCAGTATGTCTGTCAGCGCTGCGGCACAAAGGAACAGCCATTTTGTGACTGAGCTGGACTTG	317	3	n	7.7e-05	+ ++++ ++++
chr2:150311347-150311591	1	AAAGGTGGTGCTTATGTTACTCATACACACTAGCCAATCAGCACATGGAGGCGGTCCTGCCAATCAGAGGAGAAG	31	1	n	7.6e-07	+++++++++++ +
chr2:150311347-150311591	1	AAAGGTGGTGCTTATGTTACTCATACACACTAGCCAATCAGCACATGGAGGCGGTCCTGCCAATCAGAGGAGAAG	55	3	n	1e-05	++++ ++++++
chr10:80329784-80330223	1	CCGCCTCCTTTCTGGTCTGTCCAATCAGCGCTGATCTTTACCAGGCTCCGCCCATCTGTTCCTCAACTAGCTCCA CCCACGTCAATCGCTCTCCGTCAATAATCTACCGCTTGTCCAATCACTATCGTGCCACACCCTCTTGACCAATCA ACACGCCATCACCCTGGGGCCCCGCCCCCTCGGGACTCCTCGCTGCCGCCCCGGCCCTCACCCTGGCCAGAGGGC	18	1	n	2.6e-05	++ ++++++++ +
chr10:80329784-80330223	1	CCGCCTCCTTTCTGGTCTGTCCAATCAGCGCTGATCTTTACCAGGCTCCGCCCATCTGTTCCTCAACTAGCTCCA CCCACGTCAATCGCTCTCCGTCAATAATCTACCGCTTGTCCAATCACTATCGTGCCACACCCTCTTGACCAATCA ACACGCCATCACCCTGGGGCCCCGCCCCCTCGGGACTCCTCGCTGCCGCCCCGGCCCTCACCCTGGCCAGAGGGC	45	2	n	3.8e-06	++ +++++++++
chr10:80329784-80330223	1	CCGCCTCCTTTCTGGTCTGTCCAATCAGCGCTGATCTTTACCAGGCTCCGCCCATCTGTTCCTCAACTAGCTCCA CCCACGTCAATCGCTCTCCGTCAATAATCTACCGCTTGTCCAATCACTATCGTGCCACACCCTCTTGACCAATCA ACACGCCATCACCCTGGGGCCCCGCCCCCTCGGGACTCCTCGCTGCCGCCCCGGCCCTCACCCTGGCCAGAGGGC	70	2	n	2.8e-05	++ ++ +++++ +
chr10:80329784-80330223	1	CCGCCTCCTTTCTGGTCTGTCCAATCAGCGCTGATCTTTACCAGGCTCCGCCCATCTGTTCCTCAACTAGCTCCA CCCACGTCAATCGCTCTCCGTCAATAATCTACCGCTTGTCCAATCACTATCGTGCCACACCCTCTTGACCAATCA ACACGCCATCACCCTGGGGCCCCGCCCCCTCGGGACTCCTCGCTGCCGCCCCGGCCCTCACCCTGGCCAGAGGGC	112	1	n	9.7e-05	++ +++++++ +
chr10:80329784-80330223	1	CCGCCTCCTTTCTGGTCTGTCCAATCAGCGCTGATCTTTACCAGGCTCCGCCCATCTGTTCCTCAACTAGCTCCA CCCACGTCAATCGCTCTCCGTCAATAATCTACCGCTTGTCCAATCACTATCGTGCCACACCCTCTTGACCAATCA ACACGCCATCACCCTGGGGCCCCGCCCCCTCGGGACTCCTCGCTGCCGCCCCGGCCCTCACCCTGGCCAGAGGGC	141	1	n	7.3e-06	++++++++++ +
chr10:80329784-80330223	1	CCGCCTCCTTTCTGGTCTGTCCAATCAGCGCTGATCTTTACCAGGCTCCGCCCATCTGTTCCTCAACTAGCTCCA CCCACGTCAATCGCTCTCCGTCAATAATCTACCGCTTGTCCAATCACTATCGTGCCACACCCTCTTGACCAATCA ACACGCCATCACCCTGGGGCCCCGCCCCCTCGGGACTCCTCGCTGCCGCCCCGGCCCTCACCCTGGCCAGAGGGC	169	2	n	7.9e-09	+++++++++++++
chr10:80329784-80330223	226	CATGCGGCCGGGGAGACGGGGCAGGCCCCACCTCCTTTGTCCGCCCTGCCCTCCCATTGGCCAGAGCCGgggggc gggggcggagccagggtccggggccgaaagcactgggccgggggcggggccgggcggtgggcgggTGGTGAAAGT	250	2	n	8.8e-06	+++++ ++++++
chr10:80329784-80330223	226	CATGCGGCCGGGGAGACGGGGCAGGCCCCACCTCCTTTGTCCGCCCTGCCCTCCCATTGGCCAGAGCCGgggggc gggggcggagccagggtccggggccgaaagcactgggccgggggcggggccgggcggtgggcgggTGGTGAAAGT	275	1	y	9.3e-06	+++++ ++++++++
chr10:80329784-80330223	226	CATGCGGCCGGGGAGACGGGGCAGGCCCCACCTCCTTTGTCCGCCCTGCCCTCCCATTGGCCAGAGCCGgggggc gggggcggagccagggtccggggccgaaagcactgggccgggggcggggccgggcggtgggcgggTGGTGAAAGT	298	2	y	7.6e-07	++ ++++++++ ++
chr10:80329784-80330223	226	CATGCGGCCGGGGAGACGGGGCAGGCCCCACCTCCTTTGTCCGCCCTGCCCTCCCATTGGCCAGAGCCGgggggc gggggcggagccagggtccggggccgaaagcactgggccgggggcggggccgggcggtgggcgggTGGTGAAAGT	337	2	y	1.9e-07	+ +++++++++++
chr10:80329784-80330223	226	CATGCGGCCGGGGAGACGGGGCAGGCCCCACCTCCTTTGTCCGCCCTGCCCTCCCATTGGCCAGAGCCGgggggc gggggcggagccagggtccggggccgaaagcactgggccgggggcggggccgggcggtgggcgggTGGTGAAAGT	354	2	y	5.6e-05	+ ++++++++++
chr15:85832168-85832411	76	AAGCCACCAATGAGAGATCCGGATAGCGCGGCCGCCCTCGCTTCGCCCCGCTCCGCCCCCTTCCGCAATCAATAA	79	1	n	3.6e-05	+ ++++++ ++++
chr15:85832168-85832411	76	AAGCCACCAATGAGAGATCCGGATAGCGCGGCCGCCCTCGCTTCGCCCCGCTCCGCCCCCTTCCGCAATCAATAA	125	2	n	1.9e-07	++ +++++++++ +
chr15:85832168-85832411	151	CACCCTCACTTCCCCAGACCCTCTCAGAGACTCCAAAAGCTTTGACCGGTGCTGTCACTCTGCAGACCAAAGCTA	200	3	n	1.6e-05	+++++++ ++
chrX:7574302-7574887	1	AGGGCCTGAAAAGGCGGGCAGCCAATGAGAAAGCCAGAACAGGGGGGTGGGGCTCCAGTGGAGCGTAGGCGGTGA	19	1	n	5.3e-07	++++++++ ++++
chrX:7574302-7574887	1	AGGGCCTGAAAAGGCGGGCAGCCAATGAGAAAGCCAGAACAGGGGGGTGGGGCTCCAGTGGAGCGTAGGCGGTGA	40	2	y	3.4e-06	++++++ +++++
chrX:7574302-7574887	76	GCTAGAGACAGGTACGGCCAACAGCCAATGGACAGCCACGCGGGAGTGACGTACAGGTGATTGACAAGCAGGAGA	97	1	n	1.6e-05	++++++++ + ++
chrX:7574302-7574887	76	GCTAGAGACAGGTACGGCCAACAGCCAATGGACAGCCACGCGGGAGTGACGTACAGGTGATTGACAAGCAGGAGA	131	3	y	4e-06	++++++++++ ++
chrX:7574302-7574887	151	AGCTAGCAACCAATGAGGACGCCCGCGCGTGGGCGGGATGGAAGGCGGGATGATAACGGAATCAATGGAGAGGCC	157	1	n	1.6e-05	++++++++ ++ +
chrX:7574302-7574887	151	AGCTAGCAACCAATGAGGACGCCCGCGCGTGGGCGGGATGGAAGGCGGGATGATAACGGAATCAATGGAGAGGCC	176	2	y	1.1e-05	+ ++++++++++
chrX:7574302-7574887	376	CTGGGAGATCCGCAGGTTGCGTAGGCGGTGAGACGTAAGACAGATAAAATGAACAGCCAATGGAGAACTGCACGC	429	1	n	5.3e-05	++++++++ + +
chr2:122467725-122468083	76	TCCACTCTCCGATTGGCCGACGCCTCTAGCCCTGGGGCCCAGCAGCAGGGGGCGGGGCCAGACGCGGGCTGAGAC	81	1	y	4.8e-06	+++++++++++++
chr2:122467725-122468083	76	TCCACTCTCCGATTGGCCGACGCCTCTAGCCCTGGGGCCCAGCAGCAGGGGGCGGGGCCAGACGCGGGCTGAGAC	120	2	y	7.9e-09	+ ++++++++++++
chr2:177206481-177206682	1	CTGACTGGCAGGTCCATGGGGAGGCTCTGATTGGCTATTGAGTCTTGAGTGACATGAGCACCACCCTTAGGGTTA	24	1	y	9.6e-08	+++++++++++++
chr2:177206481-177206682	1	CTGACTGGCAGGTCCATGGGGAGGCTCTGATTGGCTATTGAGTCTTGAGTGACATGAGCACCACCCTTAGGGTTA	44	3	y	7.7e-06	+++++ +++++ +
chr2:160731172-160731399	1	AAGACGTCTGCGCAGAGGGGGCGTGGCAGGCGTGCTGTCACTCACGGCCTGTTAGCCAATCCACGAGTGCGCCCC	14	2	y	1.9e-05	+++++++++ +++
chr2:160731172-160731399	1	AAGACGTCTGCGCAGAGGGGGCGTGGCAGGCGTGCTGTCACTCACGGCCTGTTAGCCAATCCACGAGTGCGCCCC	33	3	n	1.1e-06	+++++++ +++++
chr2:160731172-160731399	1	AAGACGTCTGCGCAGAGGGGGCGTGGCAGGCGTGCTGTCACTCACGGCCTGTTAGCCAATCCACGAGTGCGCCCC	53	1	n	9.7e-05	+++++++++ +
chr2:160731172-160731399	76	TCCCCGGAGAGGGTGCGCGGAGGGCCCGCCCCCGCCGCCACCGCGGGTGTGAGGAGGCCAGGCTGGCGCGGCTCC	98	2	n	1.4e-06	+ +++++++++ ++
chr17:55959012-55959605	76	ACAAAGATTGCAGCCAATGAGAACGATGAAGCGGGTAGGCACCAACCAGTGAGCCGGCTTAGGAAGTGGCGACAC	86	1	n	5.3e-07	++++++++ ++++
chr17:55959012-55959605	376	GCGTCTTCCAGTCGGGCGGGAGCTTTCCAAACTCTTGCCAATCACATTTTTGGGGGCGGTCGTTAGCTTCCCCCT	408	3	n	5.9e-05	+ ++ +++++++
chr17:55959012-55959605	451	CTCCCCGCCCCCCCCCCCCCAGCTTCGTGAGTAACCAATCATCACCAGGGAAGCGGAGCTTCTGTCACTTTACCC	452	2	n	2.3e-07	+++++++++++++
chr17:55959012-55959605	451	CTCCCCGCCCCCCCCCCCCCAGCTTCGTGAGTAACCAATCATCACCAGGGAAGCGGAGCTTCTGTCACTTTACCC	482	1	n	7.3e-06	++++++++++ +
chr15:99294995-99295367	1	ccgggggtgggcccaggcgcgccccgccccagggggcggTCCCAGGATTCTGCGCACGTgggggcggggcctggc	21	2	n	7.2e-06	++++++++++
chr15:99294995-99295367	1	ccgggggtgggcccaggcgcgccccgccccagggggcggTCCCAGGATTCTGCGCACGTgggggcggggcctggc	57	2	y	6.4e-08	+ +++++++++++
chr15:99294995-99295367	76	gctccgggccgggggcggagccgggccgggcACACCGGGCCGGTTGGGGGCTCCGCTCCTCGGCGAGAGCAACCG	83	2	y	1.8e-06	+ ++++++++ ++
chr15:99294995-99295367	151	GAGCCCCGGCCACGAAGGGGTGCGACCCCCCCACTGGCCCCGCCCTCCCGGCCGAAGCCCGGCCAATCAGAGCTG	187	2	n	1.3e-07	+++++++++ +++
chr15:99294995-99295367	151	GAGCCCCGGCCACGAAGGGGTGCGACCCCCCCACTGGCCCCGCCCTCCCGGCCGAAGCCCGGCCAATCAGAGCTG	210	1	n	1.1e-06	+++++++++++++
chr15:99294995-99295367	226	TTTTTACTGGCGAGTGGGCCGAGCCGGCCCAGCTGCTCTGAGGCTCTGGCATGGTAACGTCCCCGCGCGGGGGTG GAGAGGCCCGGGGCTGTCTCACAGCGCCCCCTGCGGCCCGGGCTCGAGCCGGGGAGGCGGGAGGGCCGCCGG	291	2	y	6.3e-05	+ +++++ ++ +
chr15:99294995-99295367	226	TTTTTACTGGCGAGTGGGCCGAGCCGGCCCAGCTGCTCTGAGGCTCTGGCATGGTAACGTCCCCGCGCGGGGGTG GAGAGGCCCGGGGCTGTCTCACAGCGCCCCCTGCGGCCCGGGCTCGAGCCGGGGAGGCGGGAGGGCCGCCGG	350	2	y	1.5e-05	++++++++++++
chr2:177957331-177957534	1	GAAGAGCCGCCTCCTCTTCTGACTGGCAGGTCCATGTGGAGGCTCTGATTGGCTATTGAGTCTTGAGTGACATGA	18	3	y	8.4e-06	++++++ +++++
chr2:177957331-177957534	1	GAAGAGCCGCCTCCTCTTCTGACTGGCAGGTCCATGTGGAGGCTCTGATTGGCTATTGAGTCTTGAGTGACATGA	42	1	y	9.6e-08	+++++++++++++
chr2:177957331-177957534	1	GAAGAGCCGCCTCCTCTTCTGACTGGCAGGTCCATGTGGAGGCTCTGATTGGCTATTGAGTCTTGAGTGACATGA	62	3	y	7.7e-06	+++++ +++++ +
chr2:140395200-140395578	1	CTGCACGCCCCGCCTCCGTCGTGAAGCAGCCTCCCCGCTCCTCGAGCTCTGGCCCCGCCCCTTCCAGCTCCCCAA	7	2	n	6.6e-07	+++++++++++ +
chr2:140395200-140395578	1	CTGCACGCCCCGCCTCCGTCGTGAAGCAGCCTCCCCGCTCCTCGAGCTCTGGCCCCGCCCCTTCCAGCTCCCCAA	52	2	n	4.5e-09	++++++++++++++
chr2:140395200-140395578	151	GCCGGGAGAGCGGCGGGCGGAGCAGCCAATGGGCGGCGGCGCTGCCTGGCTGCCGGGAGGCGGGGCCTGCGCGGG	173	1	n	1.3e-05	++++++++ ++ ++
chr2:140395200-140395578	151	GCCGGGAGAGCGGCGGGCGGAGCAGCCAATGGGCGGCGGCGCTGCCTGGCTGCCGGGAGGCGGGGCCTGCGCGGG	203	2	y	5.6e-07	++++++++++++
chr2:140395200-140395578	226	TGTTAGGTTAGCGCGAGGCGTGACCTAGTTGACAGGCTCTGAGGTGCTGCTGTGGCGGCGGCCGCCTGGCAGAGC GGGCGGGTCGAGGGAGGAGGGCGGCGACGGGCCAGCGGCTAGCGGCGCGGGACGCAGAGCCTTTGCACTTTTCCC	296	2	y	5.9e-05	+++ +++++++ +
chr5:96162530-96162771	1	CAGAGAGTGCGAGGAGGAGGAGGAGGAGAGTTGATTGACGTGGAGGGGCTGGCGGGAGTCAGTCACTCCCCGGCG	30	3	y	5.1e-05	+++++++++ +
chr5:96162530-96162771	76	CCGAGGGGTGGGGTGAGGGGAAgggggcggggccccggcgcgccgcgcTTCGGGAGTTGCGCGTGCGCGCGGGAC	76	2	y	3.1e-05	++++++ ++++
chr5:96162530-96162771	76	CCGAGGGGTGGGGTGAGGGGAAgggggcggggccccggcgcgccgcgcTTCGGGAGTTGCGCGTGCGCGCGGGAC	95	2	y	3.2e-09	+ ++++++++++++
chr5:33652031-33652879	1	TCCGCTCTGCGCTTCCGTCCGAGACTCCATCTCGCAGGGGACCGCGGGCTGAGGACACAGACTGCGGTCAGTGGG CGGGGCCCCCAAGCACCGATGGTTCAGGGAACCCTTAGCTTACAGACGGCGAGAAGTCGAGGACTCGTAGACCGC	68	2	y	1.6e-06	++++++++++++
chr5:33652031-33652879	301	GCCCAACCGCCCTTAAGTGCGCAGCGGCCCCGCCCCTCGGTAACTCCCGCGCGCGCGCGGCGAAGGGCGAAACCA	327	2	n	2.8e-07	++++++++++++
chr5:33652031-33652879	451	TGGGATTGCGGGCAGTCGCTAAACTACAACGCCTAATGCGGCCGTCCGAAGGGCGGGAGAAATGGAACAGCCCGA	496	2	y	3.1e-05	++ ++++++++
chr5:33652031-33652879	526	CTAAGGCGGAAAGGAACTGGCGACCTCCCCCAGCCCCCACGGCCTTCCAGGAGGCTGGCGCTGTAGCAGCTGGGC CTCTGATTGGTTGCCCCTTCGCGGGCCCGAGGGATATTGGCGGGAGATTGGGCAGTGCGCGCCACTGCCTCTCAA	600	1	y	6.8e-08	++++++++++++++
chr5:33652031-33652879	751	ACCGCCACAGTAAGGCGGGAGAGCCCGCCTCTAGCTTATACCCATAGCTTTAAAACCGTACAAGCCATCCATTAA	772	2	n	3.3e-05	+++++++++ +
chr17:56831080-56831517	1	AGCCTCGCGCTGCCCTCACGGGGCGGGGCGTTGCGCCCGGCAACGGTTACCAAGCTGCACGCCCCGCCCCCTCCA	16	2	y	1.2e-05	+ ++++++++++
chr17:56831080-56831517	1	AGCCTCGCGCTGCCCTCACGGGGCGGGGCGTTGCGCCCGGCAACGGTTACCAAGCTGCACGCCCCGCCCCCTCCA	61	2	n	1.1e-09	++++++++++++++
chr17:56831080-56831517	76	ACGGCCCGCCCATGCCCGCCTCCAACGGCCTCGGGGAGGGCGGGCGATCTCCCCATTGGCTTTCATAGTGCCCGT	78	2	n	5.3e-06	+ +++++++++ ++
chr17:56831080-56831517	76	ACGGCCCGCCCATGCCCGCCTCCAACGGCCTCGGGGAGGGCGGGCGATCTCCCCATTGGCTTTCATAGTGCCCGT	108	2	y	1.9e-05	++++ +++++++
chr17:56831080-56831517	76	ACGGCCCGCCCATGCCCGCCTCCAACGGCCTCGGGGAGGGCGGGCGATCTCCCCATTGGCTTTCATAGTGCCCGT	124	1	y	6.1e-05	++ ++ +++++++
chr17:56831080-56831517	151	CAGAGGTGAAGGGGCAGGTCCTTGGGTAGAATACCAGCCAATCGCTGAGAAGGAGGGCGGGGCCTGGCGGGAGGC	185	1	n	3.3e-05	++++++++++ +
chr17:56831080-56831517	151	CAGAGGTGAAGGGGCAGGTCCTTGGGTAGAATACCAGCCAATCGCTGAGAAGGAGGGCGGGGCCTGGCGGGAGGC	200	2	y	4.8e-07	++ +++++++++
chr4:134714097-134714307	1	ggggctgccccgccccctggtggttgagttaagtcatgtgggtagctctggccaatgagctcctagcaaggacag	7	2	n	4.9e-08	++++++++++++
chr4:134714097-134714307	1	ggggctgccccgccccctggtggttgagttaagtcatgtgggtagctctggccaatgagctcctagcaaggacag	49	1	n	4.6e-05	++++++++ ++
chr4:134714097-134714307	151	gaccgactgggactgagaggcagctgctctgtcagaggcacgggatcctggtgtgaccag	162	3	y	8.8e-05	+++ + +++++
chr11:4186608-4187001	1	CAGGTGAGTTTTTGTGATTGGCAGCCAGGGAAGGCGGGCCCTTGGTGACGGTTGTCCCGCCCCCTCACGTCGGTC	13	3	y	3.1e-06	+++++++ +++++
chr11:4186608-4187001	1	CAGGTGAGTTTTTGTGATTGGCAGCCAGGGAAGGCGGGCCCTTGGTGACGGTTGTCCCGCCCCCTCACGTCGGTC	27	2	y	8.8e-06	+++ +++++++ +
chr11:4186608-4187001	1	CAGGTGAGTTTTTGTGATTGGCAGCCAGGGAAGGCGGGCCCTTGGTGACGGTTGTCCCGCCCCCTCACGTCGGTC	54	2	n	7.6e-07	+++++++++++++
chr11:4186608-4187001	76	CACTTGGCGCCAGGCTGGAGGAGGGGCGAGGCTCGGGACCCTCGGCACCCATTGGGCGCGTGGTGGGAGCTCCCT	94	2	y	2.6e-05	+++++++++ +++
chr11:4186608-4187001	151	GGGTATCCGCCCCCAGCTTTGTGGCAGCCAATGGGCACAGTGCGTGGGAGGGGCGTCGGCAGCGTCGGCGGAGGC	154	2	n	5.9e-05	++++++++ +
chr11:4186608-4187001	151	GGGTATCCGCCCCCAGCTTTGTGGCAGCCAATGGGCACAGTGCGTGGGAGGGGCGTCGGCAGCGTCGGCGGAGGC	175	1	n	1.2e-05	++++++++ ++ +
chr18:73572100-73572848	1	CACGCGGCTCAGGAAACCACCCCCGCGAGTGGCTAGGCTGGCACTCCGGCTCCGCCTCCGCCTCCGCCGGTTCGC	49	2	n	2.6e-06	++ ++++++++ ++
chr18:73572100-73572848	226	AGTCCGCGCCGGAGGCGCACGCGCCTGCGCAGACATCCGCTCCGCCCTCTCTGCTTCTCGCCTCGCGCGCCTTCC TCCCGCCCCGTTCCCCGGGCGCCCGGCTACGTCACAAAGAGTGGCGTGTAAATGGAACAATCTAGTTGCTCCCCT	264	2	n	1.4e-06	++ ++++++ +++
chr18:73572100-73572848	226	AGTCCGCGCCGGAGGCGCACGCGCCTGCGCAGACATCCGCTCCGCCCTCTCTGCTTCTCGCCTCGCGCGCCTTCC TCCCGCCCCGTTCCCCGGGCGCCCGGCTACGTCACAAAGAGTGGCGTGTAAATGGAACAATCTAGTTGCTCCCCT	300	2	n	3.3e-05	+++++++++ + +
chr18:73572100-73572848	376	CGAGAGCACGCCCCGCAAGAGGAGGGCGGGGCGGAGGGAGGGACGGAAGGAGCCGGCTTCGAAGACTGGCTCGTT	394	2	y	8e-08	+ ++ +++++++++
chr18:73572100-73572848	451	CTCGTCATCCAATCCGAACGGTCTGGGGCGAGGCGGGGCGGGGCCCATGAAGAGGGCGGGGGTGGGGCCGAGGGA	456	1	n	7.5e-05	++ ++++++ +++
chr18:73572100-73572848	451	CTCGTCATCCAATCCGAACGGTCTGGGGCGAGGCGGGGCGGGGCCCATGAAGAGGGCGGGGGTGGGGCCGAGGGA	476	2	y	3e-06	+++ ++++++++++
chr18:73572100-73572848	451	CTCGTCATCCAATCCGAACGGTCTGGGGCGAGGCGGGGCGGGGCCCATGAAGAGGGCGGGGGTGGGGCCGAGGGA	505	2	y	3e-06	++ +++++ +++++
chr18:73572100-73572848	526	AACGAGCGAGAAGGCTGCGGGACGAGAGGGCGGGCTCCTCCCGGAGATTAAAAGCAGCCAATCAGAGCGCGCCGG	548	2	y	1.1e-05	+++ +++++++
chr18:73572100-73572848	526	AACGAGCGAGAAGGCTGCGGGACGAGAGGGCGGGCTCCTCCCGGAGATTAAAAGCAGCCAATCAGAGCGCGCCGG	580	1	n	1.2e-07	+++++++++++++
chr18:73572100-73572848	676	AAGAAACCCTGAGAGGGGAGCCGCTGCCGTCCCCACCCACCCACCTAGTTCCCTACCTCGGCTCCGTTCCCGG	705	2	n	4.9e-05	++++ +++++++
chr17:31564324-31564984	1	TAGAGCCGGGAGGCCCAGAATCGCGAAGGTCCTCTGATGGTACAGCCCGTACTCCCCGCCTGAGCTGCAGATGGT TCCACCCAGTTCCACAAACCTTTATCCGAAGGGAGGGAGCAGACGAGTGCGCAGAGGAGGCGTGGTCTATAGCTC	74	2	n	9.3e-05	++ ++ ++++ + +
chr17:31564324-31564984	151	TCTGGGCCACGCCCCACGGCGTGGTCATGAAACATAAGCTCTGCCTCTGGGGCGGGGCAGGCTGCTACTGGCGCC	195	2	y	9.6e-06	++++++++++
chr17:31564324-31564984	226	CGGGCTGGGCCGCTGGGTGGGGCCTGGCTGAGTGCGCGCAGCGGGGCGGGACCGGCCTCTGCCCCGCCCCGCTTG	235	2	y	5.2e-05	+ ++++ +++++
chr17:31564324-31564984	226	CGGGCTGGGCCGCTGGGTGGGGCCTGGCTGAGTGCGCGCAGCGGGGCGGGACCGGCCTCTGCCCCGCCCCGCTTG	264	2	y	7.2e-06	+ ++++++++++
chr17:31564324-31564984	226	CGGGCTGGGCCGCTGGGTGGGGCCTGGCTGAGTGCGCGCAGCGGGGCGGGACCGGCCTCTGCCCCGCCCCGCTTG	286	2	n	4.7e-06	++++++++++ +
chr17:31564324-31564984	301	GGccctcccccgccccctgcctcgcccccgccccacccgccccgccccccgcccGCCGTCGCGCTgggcgggggc ggggcccggggtcggcaggccccgcccccgcggTGAATATTGATGCGGCGCGCATCGGCGTCGCCCTCCTCCCAT	307	2	n	2e-06	+++++++++++ +
chr17:31564324-31564984	301	GGccctcccccgccccctgcctcgcccccgccccacccgccccgccccccgcccGCCGTCGCGCTgggcgggggc ggggcccggggtcggcaggccccgcccccgcggTGAATATTGATGCGGCGCGCATCGGCGTCGCCCTCCTCCCAT	325	2	n	1.3e-05	+++++++++ +++
chr17:31564324-31564984	301	GGccctcccccgccccctgcctcgcccccgccccacccgccccgccccccgcccGCCGTCGCGCTgggcgggggc ggggcccggggtcggcaggccccgcccccgcggTGAATATTGATGCGGCGCGCATCGGCGTCGCCCTCCTCCCAT	339	2	n	2.2e-08	++++++++++++ +
chr17:31564324-31564984	301	GGccctcccccgccccctgcctcgcccccgccccacccgccccgccccccgcccGCCGTCGCGCTgggcgggggc ggggcccggggtcggcaggccccgcccccgcggTGAATATTGATGCGGCGCGCATCGGCGTCGCCCTCCTCCCAT	367	2	y	4.9e-08	++ +++++++++++
chr17:31564324-31564984	301	GGccctcccccgccccctgcctcgcccccgccccacccgccccgccccccgcccGCCGTCGCGCTgggcgggggc ggggcccggggtcggcaggccccgcccccgcggTGAATATTGATGCGGCGCGCATCGGCGTCGCCCTCCTCCCAT	394	2	n	1.9e-07	+++++++++++ +
chr17:31564324-31564984	526	CTGCAGCCGCTTGTCAGTGTGATGAAGATTGGCACCCAGGTAAGCTGTCACTCAACCGCTccgccgccgccgccg	568	3	n	6.5e-07	++++++++ ++++
chr1:59481981-59482296	1	CGACTTCCACCCAATCGGAACAGGTCCACAGAGAAAACAAAGCGCGCTATTGGATGTCCAGAGGGCTCGGGGCCC GCCCCCGGAGTGGTTTGTGAATGGGGGGAGGGGAGGGGGCGGGGCGGCCCGCAGCCCTGCAAGCCCGACGCTTCT	8	1	n	3.6e-05	++ ++++++++++
chr1:59481981-59482296	1	CGACTTCCACCCAATCGGAACAGGTCCACAGAGAAAACAAAGCGCGCTATTGGATGTCCAGAGGGCTCGGGGCCC GCCCCCGGAGTGGTTTGTGAATGGGGGGAGGGGAGGGGGCGGGGCGGCCCGCAGCCCTGCAAGCCCGACGCTTCT	71	2	n	1.9e-05	+ +++++++++
chr1:59481981-59482296	1	CGACTTCCACCCAATCGGAACAGGTCCACAGAGAAAACAAAGCGCGCTATTGGATGTCCAGAGGGCTCGGGGCCC GCCCCCGGAGTGGTTTGTGAATGGGGGGAGGGGAGGGGGCGGGGCGGCCCGCAGCCCTGCAAGCCCGACGCTTCT	107	2	y	1.1e-09	++++++++++++++
chr11:96977401-96978188	1	TCTAACGCCCCCTTCCGGGTGCCTCCGCCCGGCCGGCCAGCCGCGCTCCTCCTCCGGGCGGGAATCCTTCCTCCC CCGCCCCTCCCGTAGCCGGGCCCCGGCGCCAGTCCCAGTCCCAGGGGGGCACCCCCGGTTCCGGCCTCCCCTCCC	73	2	n	2.6e-06	+++++++++++++
chr11:96977401-96978188	301	CAATCCCGGAGCCCGCCACCGCCCGAGCGACGGCAGCTTTTACCAATGAACGCTTGGTACATTGGGGACCGACAG	340	1	n	8.6e-05	+ ++++++ + +
chr11:96977401-96978188	376	CATTTTCAACCAATCATTGGGAAGCATCTAGAGTGACGTTGGTCTGGCCAATAGAACTGTGAAGTGTCATTGATA	382	1	n	2.1e-05	++++++++++ ++
chr11:96977401-96978188	526	GTCCCGCCTGCTAGGAGGTTGATGGACAGCAACAGGAAGCTGGGTGAGGAGGGGCTTAGCCGAGAAGTGTTTTTG	526	2	n	4e-05	+++++++++ ++
chr11:96977401-96978188	526	GTCCCGCCTGCTAGGAGGTTGATGGACAGCAACAGGAAGCTGGGTGAGGAGGGGCTTAGCCGAGAAGTGTTTTTG	543	3	y	3.5e-06	+++++ ++++++
chr11:96977401-96978188	601	TATTGGTCGTAATTGACCTTCCACCCACCTCTAACCCAGCAGATAAGTGATAGATCTGCCCTAAAGCCAATCAGA AGTGCTACTGTGAAATGCCCCGTAAAGAGCTTATACATCTCTCAATACAGTCTGGCATGGTGAGTCTCAAGTGTA	664	1	n	3.7e-07	+++++++++++++
chr19:21652824-21653333	76	TCGACTACCGGCTTCACGGAAAGCCTTCCTCGGACCCAAGGTGCAAGTCCGGCTTTCTTCGAATCTAGAACTCCC CCATTGGCTCGAACGCGGCTGTCCATCACGGCGGAGGGACGGAGATTCCCCGTTCCTATTGGCTCTTCTTTTCCG	147	1	y	8e-05	+ ++ +++++++
chr19:21652824-21653333	76	TCGACTACCGGCTTCACGGAAAGCCTTCCTCGGACCCAAGGTGCAAGTCCGGCTTTCTTCGAATCTAGAACTCCC CCATTGGCTCGAACGCGGCTGTCCATCACGGCGGAGGGACGGAGATTCCCCGTTCCTATTGGCTCTTCTTTTCCG	167	3	n	9.2e-07	+++++++ ++++++
chr19:21652824-21653333	76	TCGACTACCGGCTTCACGGAAAGCCTTCCTCGGACCCAAGGTGCAAGTCCGGCTTTCTTCGAATCTAGAACTCCC CCATTGGCTCGAACGCGGCTGTCCATCACGGCGGAGGGACGGAGATTCCCCGTTCCTATTGGCTCTTCTTTTCCG	202	1	y	9.3e-06	++++ +++++++
chr19:21652824-21653333	226	CAATCCCCGCCTCCTGCCGAACGCTCCCAACCTGTCTCCCGGCTCCGTAGCGTAGCGACTCCGCTGCGCAGTTTG TGATTGGTGGAAGGTGGGCGAGGCCGGTGCCCTGATCGCCTGCAGCCCGGAGCCCGGGTCAGCTTCGGCGCCCTC	229	2	n	1.6e-06	+++++++++++ +
chr19:21652824-21653333	226	CAATCCCCGCCTCCTGCCGAACGCTCCCAACCTGTCTCCCGGCTCCGTAGCGTAGCGACTCCGCTGCGCAGTTTG TGATTGGTGGAAGGTGGGCGAGGCCGGTGCCCTGATCGCCTGCAGCCCGGAGCCCGGGTCAGCTTCGGCGCCCTC	297	1	y	2.8e-05	++ ++++++++ +
chr19:21652824-21653333	226	CAATCCCCGCCTCCTGCCGAACGCTCCCAACCTGTCTCCCGGCTCCGTAGCGTAGCGACTCCGCTGCGCAGTTTG TGATTGGTGGAAGGTGGGCGAGGCCGGTGCCCTGATCGCCTGCAGCCCGGAGCCCGGGTCAGCTTCGGCGCCCTC	311	2	y	3.8e-05	++++++++ +++
chr19:21652824-21653333	376	CTCCAGTCACTGAGCAGCTCGAACCGGGccgctcgcccccccgccccccgccgccctcccagctcccgcccgccg cggccgcgcgctccgccgcctggcggccTTCGGAGGTGCCAAGGAAGGCGGGCTGCGGA	413	2	n	3e-06	+++++++++++ +
chr19:21652824-21653333	376	CTCCAGTCACTGAGCAGCTCGAACCGGGccgctcgcccccccgccccccgccgccctcccagctcccgcccgccg cggccgcgcgctccgccgcctggcggccTTCGGAGGTGCCAAGGAAGGCGGGCTGCGGA	438	2	n	8.4e-05	++++++++ ++ +
chr19:21652824-21653333	376	CTCCAGTCACTGAGCAGCTCGAACCGGGccgctcgcccccccgccccccgccgccctcccagctcccgcccgccg cggccgcgcgctccgccgcctggcggccTTCGGAGGTGCCAAGGAAGGCGGGCTGCGGA	491	2	y	4.6e-05	++ +++++++
chr3:104220296-104220762	76	TGGCGCTTTCAAAcccgccgcaacctcctccccgctcggcccctcccccgccctcgccggcccggccccgccccc tcccGCAGCGCAGCGCCCGGCGCGTTGCCGTCACCAGCTCTGCTCCGGAGGACCCGCCCAGTTCTCGGCTCCGCA	120	2	n	8.8e-06	++++++++ + ++
chr3:104220296-104220762	76	TGGCGCTTTCAAAcccgccgcaacctcctccccgctcggcccctcccccgccctcgccggcccggccccgccccc tcccGCAGCGCAGCGCCCGGCGCGTTGCCGTCACCAGCTCTGCTCCGGAGGACCCGCCCAGTTCTCGGCTCCGCA	140	2	n	1.1e-09	++++++++++++++
chr3:104220296-104220762	76	TGGCGCTTTCAAAcccgccgcaacctcctccccgctcggcccctcccccgccctcgccggcccggccccgccccc tcccGCAGCGCAGCGCCCGGCGCGTTGCCGTCACCAGCTCTGCTCCGGAGGACCCGCCCAGTTCTCGGCTCCGCA	201	2	n	3.3e-05	+ ++++++++ + +
chr3:104220296-104220762	226	CCGTGGATTGGGTTCTGGCAGCTGGGGGCGGCCCTCGGCGGGCATGCTGATTTCTGATTGGGTGGTCTAAGTAGA GGAGGCGGGCACTAGAATGACTGAAGTTTAGAGAGGGAGGAAAAAAGAAGTTTAGAGTGTGAGGGAGGGAGAAGG GGGAGGGAAAAGAGAGGGTTGGTCTGGGAGCGGGCACAGGTCGCCTAGAGGGGAGAGGCCCTCCAGCCAGGGGCT	276	1	y	1.6e-05	++++++++++ ++
chr3:104220296-104220762	226	CCGTGGATTGGGTTCTGGCAGCTGGGGGCGGCCCTCGGCGGGCATGCTGATTTCTGATTGGGTGGTCTAAGTAGA GGAGGCGGGCACTAGAATGACTGAAGTTTAGAGAGGGAGGAAAAAAGAAGTTTAGAGTGTGAGGGAGGGAGAAGG GGGAGGGAAAAGAGAGGGTTGGTCTGGGAGCGGGCACAGGTCGCCTAGAGGGGAGAGGCCCTCCAGCCAGGGGCT	298	2	y	1.5e-05	+++++++++++
chr3:104220296-104220762	226	CCGTGGATTGGGTTCTGGCAGCTGGGGGCGGCCCTCGGCGGGCATGCTGATTTCTGATTGGGTGGTCTAAGTAGA GGAGGCGGGCACTAGAATGACTGAAGTTTAGAGAGGGAGGAAAAAAGAAGTTTAGAGTGTGAGGGAGGGAGAAGG GGGAGGGAAAAGAGAGGGTTGGTCTGGGAGCGGGCACAGGTCGCCTAGAGGGGAGAGGCCCTCCAGCCAGGGGCT	371	2	y	7.9e-05	+ ++++++ ++++
chr4:140906246-140906406	1	CTTGGAGGGCGGGGCCAGGCTTGACGGACGGGTTTGCAGATCCAATCCAAGAGGAGTCCGGCGGGAAGCCCCGCC CACGCCCCGCCCCCGGCTGCTGCTTAAGGCCGCCGGCTGCTCGGCAGCGAGCGCAGGCGCAGCAGCGGAGGGCTT	2	2	y	3.8e-06	++ +++++++++
chr4:140906246-140906406	1	CTTGGAGGGCGGGGCCAGGCTTGACGGACGGGTTTGCAGATCCAATCCAAGAGGAGTCCGGCGGGAAGCCCCGCC CACGCCCCGCCCCCGGCTGCTGCTTAAGGCCGCCGGCTGCTCGGCAGCGAGCGCAGGCGCAGCAGCGGAGGGCTT	20	3	y	1.5e-05	++++++ +++ +++
chr4:140906246-140906406	1	CTTGGAGGGCGGGGCCAGGCTTGACGGACGGGTTTGCAGATCCAATCCAAGAGGAGTCCGGCGGGAAGCCCCGCC CACGCCCCGCCCCCGGCTGCTGCTTAAGGCCGCCGGCTGCTCGGCAGCGAGCGCAGGCGCAGCAGCGGAGGGCTT	68	2	n	1.9e-07	+++++++++++ ++
chr18:67449143-67449603	1	GAACCCACGCTCCACGCGTGCTCGCCAGGCTCCGCCCCAGCGTGCGGACGTCGACGTGCCCTCTAGGCGGCCGGC CACGCCCTCGGGTCCGGAGAGGGGGAGGGACGCGTAACCGGGCTGGAGGCGGGAGCAAAAGGAAAGTGGGGCGGA GTGAAGGGCGTGGCCAGCCTATTAAAGAGCCGGAGGGGCGGGGTTGGGTGGGGCCAAAGGAGGAGTGGCGGGGTT AGGGCGGAGTTGGAAGACTGTGGAGGGGCGGGGCTAGAGATGGTAGCCAATGAGAACTTTGGAGGCGAGGTCAAG GCGGGGTAAAGCTGGTGGGGGCGGGCAGGAGGCGGGGCCGAAAGGGAATTGCGGCAGGTGAGGCGGGTCTGAAGG	29	2	n	1.5e-05	++ +++++++ +
chr18:67449143-67449603	1	GAACCCACGCTCCACGCGTGCTCGCCAGGCTCCGCCCCAGCGTGCGGACGTCGACGTGCCCTCTAGGCGGCCGGC CACGCCCTCGGGTCCGGAGAGGGGGAGGGACGCGTAACCGGGCTGGAGGCGGGAGCAAAAGGAAAGTGGGGCGGA GTGAAGGGCGTGGCCAGCCTATTAAAGAGCCGGAGGGGCGGGGTTGGGTGGGGCCAAAGGAGGAGTGGCGGGGTT AGGGCGGAGTTGGAAGACTGTGGAGGGGCGGGGCTAGAGATGGTAGCCAATGAGAACTTTGGAGGCGAGGTCAAG GCGGGGTAAAGCTGGTGGGGGCGGGCAGGAGGCGGGGCCGAAAGGGAATTGCGGCAGGTGAGGCGGGTCTGAAGG	74	2	n	8.4e-05	+++ +++++ +
chr18:67449143-67449603	1	GAACCCACGCTCCACGCGTGCTCGCCAGGCTCCGCCCCAGCGTGCGGACGTCGACGTGCCCTCTAGGCGGCCGGC CACGCCCTCGGGTCCGGAGAGGGGGAGGGACGCGTAACCGGGCTGGAGGCGGGAGCAAAAGGAAAGTGGGGCGGA GTGAAGGGCGTGGCCAGCCTATTAAAGAGCCGGAGGGGCGGGGTTGGGTGGGGCCAAAGGAGGAGTGGCGGGGTT AGGGCGGAGTTGGAAGACTGTGGAGGGGCGGGGCTAGAGATGGTAGCCAATGAGAACTTTGGAGGCGAGGTCAAG GCGGGGTAAAGCTGGTGGGGGCGGGCAGGAGGCGGGGCCGAAAGGGAATTGCGGCAGGTGAGGCGGGTCTGAAGG	93	2	y	4e-05	+++++++ +++++
chr18:67449143-67449603	1	GAACCCACGCTCCACGCGTGCTCGCCAGGCTCCGCCCCAGCGTGCGGACGTCGACGTGCCCTCTAGGCGGCCGGC CACGCCCTCGGGTCCGGAGAGGGGGAGGGACGCGTAACCGGGCTGGAGGCGGGAGCAAAAGGAAAGTGGGGCGGA GTGAAGGGCGTGGCCAGCCTATTAAAGAGCCGGAGGGGCGGGGTTGGGTGGGGCCAAAGGAGGAGTGGCGGGGTT AGGGCGGAGTTGGAAGACTGTGGAGGGGCGGGGCTAGAGATGGTAGCCAATGAGAACTTTGGAGGCGAGGTCAAG GCGGGGTAAAGCTGGTGGGGGCGGGCAGGAGGCGGGGCCGAAAGGGAATTGCGGCAGGTGAGGCGGGTCTGAAGG	117	2	y	2.1e-05	+ ++++++++++
chr18:67449143-67449603	1	GAACCCACGCTCCACGCGTGCTCGCCAGGCTCCGCCCCAGCGTGCGGACGTCGACGTGCCCTCTAGGCGGCCGGC CACGCCCTCGGGTCCGGAGAGGGGGAGGGACGCGTAACCGGGCTGGAGGCGGGAGCAAAAGGAAAGTGGGGCGGA GTGAAGGGCGTGGCCAGCCTATTAAAGAGCCGGAGGGGCGGGGTTGGGTGGGGCCAAAGGAGGAGTGGCGGGGTT AGGGCGGAGTTGGAAGACTGTGGAGGGGCGGGGCTAGAGATGGTAGCCAATGAGAACTTTGGAGGCGAGGTCAAG GCGGGGTAAAGCTGGTGGGGGCGGGCAGGAGGCGGGGCCGAAAGGGAATTGCGGCAGGTGAGGCGGGTCTGAAGG	139	2	y	4.6e-05	+ +++++++ +
chr18:67449143-67449603	1	GAACCCACGCTCCACGCGTGCTCGCCAGGCTCCGCCCCAGCGTGCGGACGTCGACGTGCCCTCTAGGCGGCCGGC CACGCCCTCGGGTCCGGAGAGGGGGAGGGACGCGTAACCGGGCTGGAGGCGGGAGCAAAAGGAAAGTGGGGCGGA GTGAAGGGCGTGGCCAGCCTATTAAAGAGCCGGAGGGGCGGGGTTGGGTGGGGCCAAAGGAGGAGTGGCGGGGTT AGGGCGGAGTTGGAAGACTGTGGAGGGGCGGGGCTAGAGATGGTAGCCAATGAGAACTTTGGAGGCGAGGTCAAG GCGGGGTAAAGCTGGTGGGGGCGGGCAGGAGGCGGGGCCGAAAGGGAATTGCGGCAGGTGAGGCGGGTCTGAAGG	181	2	y	1.6e-06	++++++++++++
chr18:67449143-67449603	1	GAACCCACGCTCCACGCGTGCTCGCCAGGCTCCGCCCCAGCGTGCGGACGTCGACGTGCCCTCTAGGCGGCCGGC CACGCCCTCGGGTCCGGAGAGGGGGAGGGACGCGTAACCGGGCTGGAGGCGGGAGCAAAAGGAAAGTGGGGCGGA GTGAAGGGCGTGGCCAGCCTATTAAAGAGCCGGAGGGGCGGGGTTGGGTGGGGCCAAAGGAGGAGTGGCGGGGTT AGGGCGGAGTTGGAAGACTGTGGAGGGGCGGGGCTAGAGATGGTAGCCAATGAGAACTTTGGAGGCGAGGTCAAG GCGGGGTAAAGCTGGTGGGGGCGGGCAGGAGGCGGGGCCGAAAGGGAATTGCGGCAGGTGAGGCGGGTCTGAAGG	222	2	y	4e-05	++ ++++++ +
chr18:67449143-67449603	1	GAACCCACGCTCCACGCGTGCTCGCCAGGCTCCGCCCCAGCGTGCGGACGTCGACGTGCCCTCTAGGCGGCCGGC CACGCCCTCGGGTCCGGAGAGGGGGAGGGACGCGTAACCGGGCTGGAGGCGGGAGCAAAAGGAAAGTGGGGCGGA GTGAAGGGCGTGGCCAGCCTATTAAAGAGCCGGAGGGGCGGGGTTGGGTGGGGCCAAAGGAGGAGTGGCGGGGTT AGGGCGGAGTTGGAAGACTGTGGAGGGGCGGGGCTAGAGATGGTAGCCAATGAGAACTTTGGAGGCGAGGTCAAG GCGGGGTAAAGCTGGTGGGGGCGGGCAGGAGGCGGGGCCGAAAGGGAATTGCGGCAGGTGAGGCGGGTCTGAAGG	246	2	y	9e-07	+++++++++++++
chr18:67449143-67449603	1	GAACCCACGCTCCACGCGTGCTCGCCAGGCTCCGCCCCAGCGTGCGGACGTCGACGTGCCCTCTAGGCGGCCGGC CACGCCCTCGGGTCCGGAGAGGGGGAGGGACGCGTAACCGGGCTGGAGGCGGGAGCAAAAGGAAAGTGGGGCGGA GTGAAGGGCGTGGCCAGCCTATTAAAGAGCCGGAGGGGCGGGGTTGGGTGGGGCCAAAGGAGGAGTGGCGGGGTT AGGGCGGAGTTGGAAGACTGTGGAGGGGCGGGGCTAGAGATGGTAGCCAATGAGAACTTTGGAGGCGAGGTCAAG GCGGGGTAAAGCTGGTGGGGGCGGGCAGGAGGCGGGGCCGAAAGGGAATTGCGGCAGGTGAGGCGGGTCTGAAGG	269	1	n	3.7e-07	++++++++ ++++
chr18:67449143-67449603	1	GAACCCACGCTCCACGCGTGCTCGCCAGGCTCCGCCCCAGCGTGCGGACGTCGACGTGCCCTCTAGGCGGCCGGC CACGCCCTCGGGTCCGGAGAGGGGGAGGGACGCGTAACCGGGCTGGAGGCGGGAGCAAAAGGAAAGTGGGGCGGA GTGAAGGGCGTGGCCAGCCTATTAAAGAGCCGGAGGGGCGGGGTTGGGTGGGGCCAAAGGAGGAGTGGCGGGGTT AGGGCGGAGTTGGAAGACTGTGGAGGGGCGGGGCTAGAGATGGTAGCCAATGAGAACTTTGGAGGCGAGGTCAAG GCGGGGTAAAGCTGGTGGGGGCGGGCAGGAGGCGGGGCCGAAAGGGAATTGCGGCAGGTGAGGCGGGTCTGAAGG	294	2	y	3.8e-05	++ ++++++++
chr18:67449143-67449603	1	GAACCCACGCTCCACGCGTGCTCGCCAGGCTCCGCCCCAGCGTGCGGACGTCGACGTGCCCTCTAGGCGGCCGGC CACGCCCTCGGGTCCGGAGAGGGGGAGGGACGCGTAACCGGGCTGGAGGCGGGAGCAAAAGGAAAGTGGGGCGGA GTGAAGGGCGTGGCCAGCCTATTAAAGAGCCGGAGGGGCGGGGTTGGGTGGGGCCAAAGGAGGAGTGGCGGGGTT AGGGCGGAGTTGGAAGACTGTGGAGGGGCGGGGCTAGAGATGGTAGCCAATGAGAACTTTGGAGGCGAGGTCAAG GCGGGGTAAAGCTGGTGGGGGCGGGCAGGAGGCGGGGCCGAAAGGGAATTGCGGCAGGTGAGGCGGGTCTGAAGG	325	2	y	9.9e-08	+ ++++++++++++
chr18:67449143-67449603	1	GAACCCACGCTCCACGCGTGCTCGCCAGGCTCCGCCCCAGCGTGCGGACGTCGACGTGCCCTCTAGGCGGCCGGC CACGCCCTCGGGTCCGGAGAGGGGGAGGGACGCGTAACCGGGCTGGAGGCGGGAGCAAAAGGAAAGTGGGGCGGA GTGAAGGGCGTGGCCAGCCTATTAAAGAGCCGGAGGGGCGGGGTTGGGTGGGGCCAAAGGAGGAGTGGCGGGGTT AGGGCGGAGTTGGAAGACTGTGGAGGGGCGGGGCTAGAGATGGTAGCCAATGAGAACTTTGGAGGCGAGGTCAAG GCGGGGTAAAGCTGGTGGGGGCGGGCAGGAGGCGGGGCCGAAAGGGAATTGCGGCAGGTGAGGCGGGTCTGAAGG	356	2	y	5.2e-05	++ ++++++++ +
chr18:67449143-67449603	376	AGGGACCGAAGAAGGAAAGTAGGAGGGGCCAAATAAGCAGAGCCAGATTCGCGACCGGACCTTAAAGAGTTAACA	391	2	y	8.4e-05	++++++ +++++
chr4:119733600-119733950	1	GAGCATCCGCGCAAGCGCGGCTTTCCAACCCCCAGCGAGGAGGCGGGGAGTGGGCGGAGCCGACGTCTCCCAGGC CAATCGAAAGCGAGCGCCCCCGCCCTCGGCGCTGTGGACTGAGCTTGACCCCGGTCGCGGACGGGGGCGTGGCCC	47	2	y	2.8e-07	+++++++++++ ++
chr4:119733600-119733950	1	GAGCATCCGCGCAAGCGCGGCTTTCCAACCCCCAGCGAGGAGGCGGGGAGTGGGCGGAGCCGACGTCTCCCAGGC CAATCGAAAGCGAGCGCCCCCGCCCTCGGCGCTGTGGACTGAGCTTGACCCCGGTCGCGGACGGGGGCGTGGCCC	72	1	n	1.4e-05	+++++++++ +++
chr4:119733600-119733950	1	GAGCATCCGCGCAAGCGCGGCTTTCCAACCCCCAGCGAGGAGGCGGGGAGTGGGCGGAGCCGACGTCTCCCAGGC CAATCGAAAGCGAGCGCCCCCGCCCTCGGCGCTGTGGACTGAGCTTGACCCCGGTCGCGGACGGGGGCGTGGCCC	92	2	n	1.5e-05	++++++++ + +
chr4:119733600-119733950	1	GAGCATCCGCGCAAGCGCGGCTTTCCAACCCCCAGCGAGGAGGCGGGGAGTGGGCGGAGCCGACGTCTCCCAGGC CAATCGAAAGCGAGCGCCCCCGCCCTCGGCGCTGTGGACTGAGCTTGACCCCGGTCGCGGACGGGGGCGTGGCCC	135	2	y	3.3e-05	+ +++++++ +++
chr4:119733600-119733950	151	TAGAGGGGGCGTGGTTGAGGGATGGAGGCGGGTCCTGGGGCTGTCAGTCGGCGCCCGCCGCCGCGGCTGCTCGCA	152	2	y	6.3e-05	+++++++++ ++
chr4:119733600-119733950	151	TAGAGGGGGCGTGGTTGAGGGATGGAGGCGGGTCCTGGGGCTGTCAGTCGGCGCCCGCCGCCGCGGCTGCTCGCA	171	2	y	1.1e-05	+ +++++++++ +
chr4:119733600-119733950	151	TAGAGGGGGCGTGGTTGAGGGATGGAGGCGGGTCCTGGGGCTGTCAGTCGGCGCCCGCCGCCGCGGCTGCTCGCA	189	3	n	1.1e-05	+++++++++++
chr4:149426602-149426976	1	CCATCTTTGAAAGGGGTCACGTGACCCTCGCCGGGGAGGCGGGGCTTCTCGCTCTGGGATTCGCCAGCCAATAAG CAGCGGGCGTCGCGCCGCCGATTTCCTCTTCGCTTGCATCCTGTCCCCGCCCCCTGCCCCACCCCCTCTTCCCTG	32	2	y	1.9e-07	+++++++++++++
chr4:149426602-149426976	1	CCATCTTTGAAAGGGGTCACGTGACCCTCGCCGGGGAGGCGGGGCTTCTCGCTCTGGGATTCGCCAGCCAATAAG CAGCGGGCGTCGCGCCGCCGATTTCCTCTTCGCTTGCATCCTGTCCCCGCCCCCTGCCCCACCCCCTCTTCCCTG	65	1	n	3.3e-06	++++++++ ++ ++
chr4:149426602-149426976	1	CCATCTTTGAAAGGGGTCACGTGACCCTCGCCGGGGAGGCGGGGCTTCTCGCTCTGGGATTCGCCAGCCAATAAG CAGCGGGCGTCGCGCCGCCGATTTCCTCTTCGCTTGCATCCTGTCCCCGCCCCCTGCCCCACCCCCTCTTCCCTG	119	2	n	4e-07	+++++++++++ +
chr4:149426602-149426976	151	AGCGGCGCCAGGCGGGGGGAGGGGCGAGAGGGGCTGCTAAGAGGAGACGAGGAGGAGGCGGGGCGGACAGTCACC	162	2	y	2.4e-05	+ ++++++ +++++
chr4:149426602-149426976	151	AGCGGCGCCAGGCGGGGGGAGGGGCGAGAGGGGCTGCTAAGAGGAGACGAGGAGGAGGCGGGGCGGACAGTCACC	201	2	y	2.2e-08	++++++++++++++
chr4:149426602-149426976	226	ATGGAGACTGAGCGGAGGCGAGGGGCGCGGTGGGCGGGGCCCAGGTAGAATTGCTGAGGGCAGGATGTGCCAATC	252	2	y	9.9e-08	+ ++++++++++++
chr7:41393137-41393639	151	GAAAAACAATCAGAACTTTTCCAGCAGGGTCCGTTATAGAGCTGAAACTGCCGCAAGGAACCCGGAAGGTCCCGC CTTCTCTCCTGACTGACAAATCCACCCCAAGGCTCCGATTGGTCACTAAGTCTTGCGTAACATGAACAGCTCCAC	219	2	n	1.8e-06	+++++++++ +++
chr7:41393137-41393639	151	GAAAAACAATCAGAACTTTTCCAGCAGGGTCCGTTATAGAGCTGAAACTGCCGCAAGGAACCCGGAAGGTCCCGC CTTCTCTCCTGACTGACAAATCCACCCCAAGGCTCCGATTGGTCACTAAGTCTTGCGTAACATGAACAGCTCCAC	233	3	y	1.6e-05	+ +++++++++ +
chr7:41393137-41393639	151	GAAAAACAATCAGAACTTTTCCAGCAGGGTCCGTTATAGAGCTGAAACTGCCGCAAGGAACCCGGAAGGTCCCGC CTTCTCTCCTGACTGACAAATCCACCCCAAGGCTCCGATTGGTCACTAAGTCTTGCGTAACATGAACAGCTCCAC	257	1	y	4.2e-06	+++++++++++++
chr7:41393137-41393639	301	CTCAAGGTTCTGATTGGCCATTAAACCTCCCTTAGGGTTAGAATGTGCAGATGGGACTCCGCTTGGTTGCTGGCC	307	1	y	5.3e-07	+++++++++++++
chr18:33213824-33214211	1	AACCCCGCGCGTTTCAGCAAGATATTTTCCAGCCCGCCCAGCGCGGCTGGCAGCAGCCAATGGGCGCGGGACGCC	31	2	n	7.1e-05	++++++++ + +
chr18:33213824-33214211	1	AACCCCGCGCGTTTCAGCAAGATATTTTCCAGCCCGCCCAGCGCGGCTGGCAGCAGCCAATGGGCGCGGGACGCC	54	1	n	1.6e-05	++++++++ ++ +
chr18:33213824-33214211	76	TTCCAGCCACAGCCAATCAGAAGGCAGAAGGCTGCCTTGGTGAAGGCGAGCAACGCCCTTCAGCCCCGCCCTGCC CGAATCCTCGGAGGGGAACCTCCGTGGGGTGTTAGCGGGAGTAACGTGTGTTCGCTGGGATTGGCTGGTGCCTCA	85	1	n	1.7e-08	++++++++++++++
chr18:33213824-33214211	76	TTCCAGCCACAGCCAATCAGAAGGCAGAAGGCTGCCTTGGTGAAGGCGAGCAACGCCCTTCAGCCCCGCCCTGCC CGAATCCTCGGAGGGGAACCTCCGTGGGGTGTTAGCGGGAGTAACGTGTGTTCGCTGGGATTGGCTGGTGCCTCA	138	2	n	2.3e-06	+++++++++ +++
chr18:33213824-33214211	76	TTCCAGCCACAGCCAATCAGAAGGCAGAAGGCTGCCTTGGTGAAGGCGAGCAACGCCCTTCAGCCCCGCCCTGCC CGAATCCTCGGAGGGGAACCTCCGTGGGGTGTTAGCGGGAGTAACGTGTGTTCGCTGGGATTGGCTGGTGCCTCA	204	1	y	6.1e-05	++ +++++++++
chr18:33213824-33214211	226	GCGTGAAGGGAGCCGATTGGCCTCCGAGGATGGACCGATTCCGCGTGCGTGTGGGCTGGCCGGAGCCAGACAGAG	235	1	y	9.7e-05	++++++++++
chr7:19421383-19421619	1	TAGGCGCAGGGCGTGGCGCACCAGCCTGCAGTGTGCGCTGGTGCCCCGCCTCCTGGAAGTCCAATCATTGGGCTC	43	2	n	3.4e-07	++++++++++++
chr7:19421383-19421619	76	TGTCCTCTGGGTTCTGGCCAATGAGAACCTGCCTCTCCGGAGCCCCGCCCACCTGCTTCTCAGGCGCTCCGGAGC	90	1	n	2.4e-06	++++++++ ++++
chr7:19421383-19421619	76	TGTCCTCTGGGTTCTGGCCAATGAGAACCTGCCTCTCCGGAGCCCCGCCCACCTGCTTCTCAGGCGCTCCGGAGC	117	2	n	2.3e-07	++++++++++++
chr7:19421383-19421619	151	GCCGGCTGCTTCTCCATGCCCTGCCTTAAATAAAAGTCCGTGATGGCCTTAGCTGTGAGTGTGCCAGCTACTGAG GGAGGAGGAGC	223	2	y	9.3e-05	+ ++++++ ++ ++
chr6:34476099-34476447	1	GACTAAAGCCCGCCTGCCTATGTCCGAAACTACCATCTTATTGGTCTATCCGTGCGTCTGTTTCCTCATTAAACC AATCATAGCTTCCCTTCTTACCCCAGGGACTTGAGAAACCGGAAAGAACCTCCGGCTGGTCGCTGGCCAGAGGGC GGGGCCGTGAATGAGTGACAACTCTGTCTTCCAATACCCAGCGCTATCGGTTCTGACCATTTTGGCTTCTAGGCT	34	1	y	3.9e-05	+ +++ +++++++
chr6:34476099-34476447	1	GACTAAAGCCCGCCTGCCTATGTCCGAAACTACCATCTTATTGGTCTATCCGTGCGTCTGTTTCCTCATTAAACC AATCATAGCTTCCCTTCTTACCCCAGGGACTTGAGAAACCGGAAAGAACCTCCGGCTGGTCGCTGGCCAGAGGGC GGGGCCGTGAATGAGTGACAACTCTGTCTTCCAATACCCAGCGCTATCGGTTCTGACCATTTTGGCTTCTAGGCT	71	1	n	9.3e-06	+++++++++ ++
chr6:34476099-34476447	1	GACTAAAGCCCGCCTGCCTATGTCCGAAACTACCATCTTATTGGTCTATCCGTGCGTCTGTTTCCTCATTAAACC AATCATAGCTTCCCTTCTTACCCCAGGGACTTGAGAAACCGGAAAGAACCTCCGGCTGGTCGCTGGCCAGAGGGC GGGGCCGTGAATGAGTGACAACTCTGTCTTCCAATACCCAGCGCTATCGGTTCTGACCATTTTGGCTTCTAGGCT	142	2	y	2.3e-07	++ +++++++++
chr6:34476099-34476447	1	GACTAAAGCCCGCCTGCCTATGTCCGAAACTACCATCTTATTGGTCTATCCGTGCGTCTGTTTCCTCATTAAACC AATCATAGCTTCCCTTCTTACCCCAGGGACTTGAGAAACCGGAAAGAACCTCCGGCTGGTCGCTGGCCAGAGGGC GGGGCCGTGAATGAGTGACAACTCTGTCTTCCAATACCCAGCGCTATCGGTTCTGACCATTTTGGCTTCTAGGCT	160	3	y	2.2e-05	+++ +++++ ++
chrX:140456494-140456789	1	TTGGGCGGCAACATTACCGGAAGACTCCGCCCCTCACACCCGTCCAACCAATCAGAAAAGGCTGGGTGGAGAACT	24	2	n	1.1e-05	+ +++++++++ +
chrX:140456494-140456789	1	TTGGGCGGCAACATTACCGGAAGACTCCGCCCCTCACACCCGTCCAACCAATCAGAAAAGGCTGGGTGGAGAACT	45	1	n	6.2e-08	+++++++++++++
chrX:140456494-140456789	76	TCCTTTGTAATCCCGCCCCCTGGGCAATTTAATGCCGCGCGCTGGGCGGGAATGTAAGATGGCGGAGTAGCAACG	85	2	n	3e-06	+++++++++++
chrX:140456494-140456789	76	TCCTTTGTAATCCCGCCCCCTGGGCAATTTAATGCCGCGCGCTGGGCGGGAATGTAAGATGGCGGAGTAGCAACG	114	2	y	3.3e-05	+ + +++++++++
chr8:69716467-69717314	451	TTCTTGATTGGACATCTTGCCCCGAAGCTTTGATTGGCTAGAGCTGCACCACAAGTCTGATTGACAGGAGTTCCC	451	1	y	7.5e-05	+ +++++++ ++
chr8:69716467-69717314	451	TTCTTGATTGGACATCTTGCCCCGAAGCTTTGATTGGCTAGAGCTGCACCACAAGTCTGATTGACAGGAGTTCCC	477	1	y	3.7e-07	++ ++++++++++
chr8:69716467-69717314	451	TTCTTGATTGGACATCTTGCCCCGAAGCTTTGATTGGCTAGAGCTGCACCACAAGTCTGATTGACAGGAGTTCCC	506	3	y	8.3e-07	+++++++++++
chr8:69716467-69717314	601	TTAGGCGCTCTTGAGTGAGTGGCCTGGCCTGAAGGTTCTGATTGGCTAGCACTGCCCTACGAGGGCCTGAGTGAC AGGAACAGCTTCGCTTGGTCCTTGTGAATGAATGTCCTGCCCTCAGGGCCCTGATTGGCTAGTGAAATCTGAATG ACAGCTCCCATAAGTGGATGAACTGAAATTAAAAGACGTGGACCACACAGACCTTCCCAACTCTGGCTTTCACCC	635	1	y	3.7e-08	+++++++++++++
chr8:69716467-69717314	601	TTAGGCGCTCTTGAGTGAGTGGCCTGGCCTGAAGGTTCTGATTGGCTAGCACTGCCCTACGAGGGCCTGAGTGAC AGGAACAGCTTCGCTTGGTCCTTGTGAATGAATGTCCTGCCCTCAGGGCCCTGATTGGCTAGTGAAATCTGAATG ACAGCTCCCATAAGTGGATGAACTGAAATTAAAAGACGTGGACCACACAGACCTTCCCAACTCTGGCTTTCACCC	666	3	y	1.3e-06	+ +++ +++++++
chr8:69716467-69717314	601	TTAGGCGCTCTTGAGTGAGTGGCCTGGCCTGAAGGTTCTGATTGGCTAGCACTGCCCTACGAGGGCCTGAGTGAC AGGAACAGCTTCGCTTGGTCCTTGTGAATGAATGTCCTGCCCTCAGGGCCCTGATTGGCTAGTGAAATCTGAATG ACAGCTCCCATAAGTGGATGAACTGAAATTAAAAGACGTGGACCACACAGACCTTCCCAACTCTGGCTTTCACCC	723	1	y	8.3e-06	+ +++++++++++
chr8:69716467-69717314	601	TTAGGCGCTCTTGAGTGAGTGGCCTGGCCTGAAGGTTCTGATTGGCTAGCACTGCCCTACGAGGGCCTGAGTGAC AGGAACAGCTTCGCTTGGTCCTTGTGAATGAATGTCCTGCCCTCAGGGCCCTGATTGGCTAGTGAAATCTGAATG ACAGCTCCCATAAGTGGATGAACTGAAATTAAAAGACGTGGACCACACAGACCTTCCCAACTCTGGCTTTCACCC	743	3	y	7.7e-06	+++ ++++++++
chr6:88084367-88084673	76	CCAGCCATCTTGTGGTGCTGTTGGCCAATCAGCGGTTGCGCCGTGGCGGGGGGGCGGGGCGCGTGTCGGTGGCGC	97	1	n	4.2e-06	+++++++++++ ++
chr6:88084367-88084673	76	CCAGCCATCTTGTGGTGCTGTTGGCCAATCAGCGGTTGCGCCGTGGCGGGGGGGCGGGGCGCGTGTCGGTGGCGC	122	2	y	2.2e-08	+++++++++++++
chr8:117157798-117158112	76	AGCCCTTCTGATTGGCTGCTGCGAGGTAGGGCGGGGCGCGGGGGCGTCGCGGAAAGATGACGCAACGGCACAGCT	80	1	y	1.7e-08	++++++++++++++
chr8:117157798-117158112	76	AGCCCTTCTGATTGGCTGCTGCGAGGTAGGGCGGGGCGCGGGGGCGTCGCGGAAAGATGACGCAACGGCACAGCT	99	2	y	4.2e-06	++ +++++++++
chr8:117157798-117158112	226	TCACTCAGTCcgggcgggcgggcgagcggacgcgaggagtggccggcggggacgtgcgcgggactcgggcgggcg ggtcgggcaggtgg	291	2	y	5.9e-05	+++ +++++++ +
chr3:97658015-97658429	1	AGCCCTGGGCGGACAGTTCACAGCCCTAATCCCGACCCGGACCCCACCCTCGGCCCCGCCCCAAGCCGGAGCTGC	53	2	n	2e-06	++++++++++ +
chr3:97658015-97658429	76	GCACGCACCCACCACAGAGGCGGTGCTGGTGGCTAGAGAGGCAGGCGACCCAGGCTGAGGAGGGGGCGGGGCTGG	134	2	y	1.1e-09	++++++++++++++
chr3:97658015-97658429	151	AGCGCAGGGGGCGGAACAAGAGGCTCGGTGGGCGGGGCCAGAGGCAGAGGCGGTACCTCGTCGCGGGCCTTGTAG	154	2	y	9e-07	+ +++++++++ ++
chr3:97658015-97658429	151	AGCGCAGGGGGCGGAACAAGAGGCTCGGTGGGCGGGGCCAGAGGCAGAGGCGGTACCTCGTCGCGGGCCTTGTAG	175	2	y	2.3e-06	++++++++++++
chr11:96829506-96830365	1	TGACCCACCCTTAAAAGCGAGCCTCACCCCGCCCTCCGTTCCCCAGGCCCCACCCCGCTCGCGAGCCCAGCCTCA	26	2	n	5.9e-06	++++++++ ++
chr11:96829506-96830365	1	TGACCCACCCTTAAAAGCGAGCCTCACCCCGCCCTCCGTTCCCCAGGCCCCACCCCGCTCGCGAGCCCAGCCTCA	47	2	n	1.9e-05	+++++ ++++ + +
chr11:96829506-96830365	151	CTTTCCGGCCGTGTCCAGGGCCCGAGCCCGATCAAGACCCCTCTCGGCCTCCCGGGTCCCGCCTCCTGCTCCTCA	206	2	n	4e-07	++++++++++++ +
chr11:96829506-96830365	376	CGCCACCGCCGCCGTCGCCGCCACCTCCGGCCGGCCTGGAGCGCCCAGCCTCGGCTTCCCTCCCCGCCCCCTCCT	436	2	n	1.3e-07	+++++++++++++
chr11:96829506-96830365	451	TCCACTGCACTCGGAAACCCGCCCGCCACGGCCACCCCAGAAACAGTTGGTCCAATCAGATAGCCGGGACTAGAG	499	1	n	6.1e-05	+ +++++++++
chr11:96829506-96830365	526	TCGTCACCGGATGTCACTTTGATTGACAGCAAAGAAAACCCAATAGTCGAGTTTGTGTCTGCCCACTCGGCACAG	543	3	y	4.2e-07	++++++++++++
chr11:96829506-96830365	601	TCCTCCCGAGACTGACGTGGAGAGAAGTCCAATGAGTGTGCAGGCCCGCCCCCCGGTATGGACCCACCAATGAGT	643	2	n	2e-06	+ ++++++++++
chr11:96829506-96830365	676	GAGGCGAAGGCCCTAGTGTCCGGCATTCTGAACCTCTCCGCTGCGGGTTGGAGGTGGGCGGTGTTGTAAGTTAGG	726	2	y	8.8e-05	+ +++++++++ +
chr17:6827826-6828276	76	TGTCGTCACCATGGATGGCCAATCAGAGCGCGCGACTAAAATAGCGCAGTATAAAAGCTGGCGGGAGGACACCGG	91	1	n	9.3e-07	+++++++++++++
chr17:6827826-6828276	151	CCGTTCCGCTCCTTTGCCGGGCGTGGTTGCGCGCGCAGGTGATGGGCCTCCGCCCCGCCCACTGCACACCTGCTT	202	2	n	4.9e-08	++++++++++++ +
chr17:6827826-6828276	301	AAGCGCAGAACTGGGCTCGTGCTCGGCGGGACTCCCGCCTCCCGGGCTTCTCTTCAGACAGTAGGCCGCCGCAGC	332	2	n	2.4e-05	+++++++++++
chr17:6827826-6828276	376	CTTGCGTCATCCAGGCCGCCTTGTAGCGCGGATGGAGCCGCACTTCCGGTGGGATCGTGCCCCGCCCGGGTGCCG	434	2	n	9.9e-05	+++++++++
chr5:124327529-124328280	1	GCAGGGCAGGACACTCACGCCCCTTGCAAAGGCAGCAATCCGATTGGGCCTCACTGATGTCACTCAAGGGCACGA	55	3	n	7.7e-06	+ +++++ +++++
chr5:124327529-124328280	226	ACGCAGCTCCCCACAAGCCGCGACCGCTTACCTGACCTCCTCGCCTCCGCCTTAGATCGGGTACCCGGAGATTTG	263	2	n	9.3e-05	++ +++++++ ++
chr5:124327529-124328280	301	GCCTCACGCGACCGTTAAATTCCAAGGAACGTGCGCGCGCCCGGCGCCTCAGCCGCGATTGGCTGCTCGGAAGAG	352	1	y	4.6e-05	+ ++++++++++
chr5:124327529-124328280	451	AGAGGGCAGGGCGACGCCGGAGGCCTGAGGGGGCGGGGCTCTAGGGCCAAGACCTCTGCTGATTGGTTCTCTGGA	476	2	y	2.3e-07	+++++++++++++
chr5:124327529-124328280	451	AGAGGGCAGGGCGACGCCGGAGGCCTGAGGGGGCGGGGCTCTAGGGCCAAGACCTCTGCTGATTGGTTCTCTGGA	506	1	y	2.8e-06	++ ++++++++++
chr1:191906531-191906911	1	cccagtgcacaggccccgcccccagctcccgcggccgcgccccgccccctcccgcccctccgccGCGCTAGCCAA TAGAGGCCGAGGAAGGGCGGGACGCCGGGGCTGTCGTGAGGCAGCTCTGGCCAATGGGGAGGCGAGCCGGGCCTG GGGGGCGGGGCACCGGGGCCTTGTCACGCTCGGGTCCGTGTGAAAACGGGGGTTCCGAGTGCAAAGCAAAGTTTT	13	2	n	6.4e-08	+++++++++++ +
chr1:191906531-191906911	1	cccagtgcacaggccccgcccccagctcccgcggccgcgccccgccccctcccgcccctccgccGCGCTAGCCAA TAGAGGCCGAGGAAGGGCGGGACGCCGGGGCTGTCGTGAGGCAGCTCTGGCCAATGGGGAGGCGAGCCGGGCCTG GGGGGCGGGGCACCGGGGCCTTGTCACGCTCGGGTCCGTGTGAAAACGGGGGTTCCGAGTGCAAAGCAAAGTTTT	39	2	n	1.1e-09	++++++++++++++
chr1:191906531-191906911	1	cccagtgcacaggccccgcccccagctcccgcggccgcgccccgccccctcccgcccctccgccGCGCTAGCCAA TAGAGGCCGAGGAAGGGCGGGACGCCGGGGCTGTCGTGAGGCAGCTCTGGCCAATGGGGAGGCGAGCCGGGCCTG GGGGGCGGGGCACCGGGGCCTTGTCACGCTCGGGTCCGTGTGAAAACGGGGGTTCCGAGTGCAAAGCAAAGTTTT	69	1	n	6.6e-05	++++++++ + +
chr1:191906531-191906911	1	cccagtgcacaggccccgcccccagctcccgcggccgcgccccgccccctcccgcccctccgccGCGCTAGCCAA TAGAGGCCGAGGAAGGGCGGGACGCCGGGGCTGTCGTGAGGCAGCTCTGGCCAATGGGGAGGCGAGCCGGGCCTG GGGGGCGGGGCACCGGGGCCTTGTCACGCTCGGGTCCGTGTGAAAACGGGGGTTCCGAGTGCAAAGCAAAGTTTT	85	2	y	1.6e-06	+++ +++++++++
chr1:191906531-191906911	1	cccagtgcacaggccccgcccccagctcccgcggccgcgccccgccccctcccgcccctccgccGCGCTAGCCAA TAGAGGCCGAGGAAGGGCGGGACGCCGGGGCTGTCGTGAGGCAGCTCTGGCCAATGGGGAGGCGAGCCGGGCCTG GGGGGCGGGGCACCGGGGCCTTGTCACGCTCGGGTCCGTGTGAAAACGGGGGTTCCGAGTGCAAAGCAAAGTTTT	123	1	n	5.7e-05	++++++++ ++ ++
chr1:191906531-191906911	1	cccagtgcacaggccccgcccccagctcccgcggccgcgccccgccccctcccgcccctccgccGCGCTAGCCAA TAGAGGCCGAGGAAGGGCGGGACGCCGGGGCTGTCGTGAGGCAGCTCTGGCCAATGGGGAGGCGAGCCGGGCCTG GGGGGCGGGGCACCGGGGCCTTGTCACGCTCGGGTCCGTGTGAAAACGGGGGTTCCGAGTGCAAAGCAAAGTTTT	148	2	y	1.9e-07	++++++++++++
chr8:57511572-57512079	1	CTCTCGGGGCCTGCCCCACCCTCATGGCCAATCAGCAGCGGGCCCGCCATTTTTCAAACGCTTTTCCTGCCGCCA ATCAGGGCCGAGCAGTACATTCCTCTCTAGACCGGTTCCAACGGGTCTGGGAGTTAACGACCTGGGAGACCCACC	25	1	n	2.8e-06	+++++++++++ ++
chr8:57511572-57512079	1	CTCTCGGGGCCTGCCCCACCCTCATGGCCAATCAGCAGCGGGCCCGCCATTTTTCAAACGCTTTTCCTGCCGCCA ATCAGGGCCGAGCAGTACATTCCTCTCTAGACCGGTTCCAACGGGTCTGGGAGTTAACGACCTGGGAGACCCACC	68	3	n	3.9e-05	++ + ++++++ +
chr8:57511572-57512079	151	GAACCTGCTAGGCTTAGCCTGGAGGGACGGGCCTGGCCAGACACCCACCAATCGGAAGCCTTCTCCGTGGGGGGG CGGGGACTCTCCGGGTTTGAATAATCCTCCACAGCCAATCAGAGCGGAGGGAGGTGTGGCCCGCGACTGGTCTGG	195	1	n	2.6e-05	+ ++++++++++++
chr8:57511572-57512079	151	GAACCTGCTAGGCTTAGCCTGGAGGGACGGGCCTGGCCAGACACCCACCAATCGGAAGCCTTCTCCGTGGGGGGG CGGGGACTCTCCGGGTTTGAATAATCCTCCACAGCCAATCAGAGCGGAGGGAGGTGTGGCCCGCGACTGGTCTGG	218	2	y	3.8e-06	++++++++++++
chr8:57511572-57512079	151	GAACCTGCTAGGCTTAGCCTGGAGGGACGGGCCTGGCCAGACACCCACCAATCGGAAGCCTTCTCCGTGGGGGGG CGGGGACTCTCCGGGTTTGAATAATCCTCCACAGCCAATCAGAGCGGAGGGAGGTGTGGCCCGCGACTGGTCTGG	257	1	n	1.2e-07	+++++++++++++
chr7:18910358-18910752	1	CGGACTCGATCTTCACGAGCGGTTCAACCGCCGAAGTTTCAGCTCCGCCCACATCCGGCCTTCTCACTTCTGATT GGTCTGATCTTACAGGCAGCCATGTTTCCATAAGTCAAAAGCGACGCCCGTCACTCTGTCCCGCCCCCATGGGAG	42	2	n	1.6e-06	++ ++++++++ +
chr7:18910358-18910752	1	CGGACTCGATCTTCACGAGCGGTTCAACCGCCGAAGTTTCAGCTCCGCCCACATCCGGCCTTCTCACTTCTGATT GGTCTGATCTTACAGGCAGCCATGTTTCCATAAGTCAAAAGCGACGCCCGTCACTCTGTCCCGCCCCCATGGGAG	67	1	y	2.4e-06	+++++++++++++
chr7:18910358-18910752	1	CGGACTCGATCTTCACGAGCGGTTCAACCGCCGAAGTTTCAGCTCCGCCCACATCCGGCCTTCTCACTTCTGATT GGTCTGATCTTACAGGCAGCCATGTTTCCATAAGTCAAAAGCGACGCCCGTCACTCTGTCCCGCCCCCATGGGAG	133	2	n	5.6e-07	+++++++++++
chr7:18910358-18910752	226	TTACAGTCTGTTTCTAGTGATTATTGGGTAGATATTCTGCCAATCATAAGAAAAAGGTGGTCCCTTGGAGTAGAA	260	3	n	2.8e-05	+++ ++++++
chr7:18910358-18910752	301	GGAGGATCCCGGAAATAGCATTTTTACTCCGCCTACCACACCCACCACCCCCAGCAAGGCAGGCCTCGCCCACAG AGAAGGAAGGGGCTGACTA	326	2	n	2.4e-05	+ +++++++++ +
chr7:18910358-18910752	301	GGAGGATCCCGGAAATAGCATTTTTACTCCGCCTACCACACCCACCACCCCCAGCAAGGCAGGCCTCGCCCACAG AGAAGGAAGGGGCTGACTA	363	2	n	9.9e-05	+++ +++++++
chr8:4677389-4678816	76	ATTGGAAACCCGTGCCGTCAGTCACTGGCCAGCGGGCGGGGCTTCCTACCATCTCATGTCAGTGCAGTTGCTGTC	88	3	n	1.3e-05	++ +++++++++
chr8:4677389-4678816	76	ATTGGAAACCCGTGCCGTCAGTCACTGGCCAGCGGGCGGGGCTTCCTACCATCTCATGTCAGTGCAGTTGCTGTC	104	2	y	8.8e-06	++ +++++++++
chr8:4677389-4678816	151	ATGGCCTTGCCTCAGCTCCTTTATTCACGGGAATCCCCCTGCCTCACTCTCACACCCGCTGTCATCCCCCGCCCC GTGCCTCAGCTGCAGACAGTGATTCCGTTTCCCGCTCCCGCTTCGCTCCTCAGCCGCCGCCGCAGAGGGGCTCCC	216	2	n	2.3e-05	+++++++++ + +
chr8:4677389-4678816	301	GCCGCCCACTGGAAGCCTCTCCGTGCCGTCAGTCACGGTGCCATTCGGTACGACCGGAAACAGCGAGCAGGACGG	324	3	n	6.9e-06	++ ++++++++++
chr8:4677389-4678816	601	GCTAGGAGTCGTAATTCTGTCCCAGTCCCGGGTTTGGGTCCTCTGAGCCCCGCGAGGTTTTTCTCTGATTGGCGA	662	1	y	1.6e-05	+++++++++++ +
chr8:4677389-4678816	676	GCACAGCTCAGTGGGCGGAGACGGTGATTGACAGGCGGAGGGGGCGGCTACATCACTGCGTTTGTTTATATATTG	683	2	y	3.1e-05	+++++++++ +
chr8:4677389-4678816	676	GCACAGCTCAGTGGGCGGAGACGGTGATTGACAGGCGGAGGGGGCGGCTACATCACTGCGTTTGTTTATATATTG	698	3	y	1.2e-07	+++++++++++++
chr8:4677389-4678816	751	AGAAAAGAAAAATAAAGCGCAAGCCCCTGCCTCAGTCAAGGCCAAGCGGGCGGGGCTTCCTGCTGCGTACCGGAA	793	2	y	7.2e-06	++ +++++++++
chr8:4677389-4678816	976	CCGCTTCCGCGTTCTGACTCCTGTGACGTCAGAGCCGGCATCATCGAGGTGTGCGCGCACTGCCACGCCCACTGA	1037	2	n	8.4e-05	+++ ++++++++
chr8:4677389-4678816	1126	GGTGACCCCAATGTCAGTCAGACGCCTCCGTTCCCACAGCCGCCGTGACGTGGTAGGTCACAGCCGCTGCCGACA	1134	3	n	6.8e-05	+++++++++
chr8:4677389-4678816	1351	TAGGCCCCGCCCACAACACTCAGGCTATGCCCACAGGGCTTTATGCCTCTTCCACACATCCTTAGGCAACTCACA	1354	2	n	4e-07	+++++++++++ +
chr6:113419305-113419577	1	TCAGGGCTCCCATTGCCGGGGACCAAGCACAGTACGCATGCGTGTCCACGGACAGCTCAACCCCACCTCCCGTAC	60	2	n	4.9e-05	++++ ++++++
chr6:113419305-113419577	76	ATCCTCCGTGCGTAGATTGGTCAGGCAGGCTGTCAATCAAGGCAGAGGGCGCTCAGACGAGCGAGAATCCGGGCT	103	3	n	6.9e-09	++++++++++++++
chr10:81292591-81293379	1	tcatgtctaggctctgccccttgatatccGATTGGCTGTAGTAGACTCTAGACCACGCCCCATCTCGGTCCCCTG	25	1	y	8.3e-06	++++++++++++
chr10:81292591-81293379	151	ACTTTAGCTCCACCCCTGCTACCTAATTGGTCAGGTTCCTCACTTTGCTGAGGCCCCGCCTTCCGCCCCCATACC	157	2	n	3.8e-05	++ ++ +++++ +
chr10:81292591-81293379	151	ACTTTAGCTCCACCCCTGCTACCTAATTGGTCAGGTTCCTCACTTTGCTGAGGCCCCGCCTTCCGCCCCCATACC	203	2	n	6.6e-07	+++++++++ ++ +
chr10:81292591-81293379	301	CCCAGTCCTTATATCCAATTGGTTAGGAGCTTCGCGTCGACGCCAGGCTCCGCCCGGGCCCCGCCCCCTCCCTCC	358	2	n	1.1e-09	++++++++++++++
chr10:81292591-81293379	451	cgccggAGCGTTCGGCCATGGAGCTAGAGGTGCCGGACGAGGCGGAGAGCGCCGAAGCGGGGGCCGTGACGGCGG	485	2	y	3.5e-05	+++ +++++++ +
chr10:81292591-81293379	526	AAGCGGCCTGGTCTGCGGAGAGTGGGGCGGCGGCAGGTAATGCGATCCCCCTGGTCGTTGCGATGGGCTCGCCCC TCTCCCCCGCCGTGGCGCGTGGTCTCGACCGCCTGCTTCGCGCTGCGGTGCGGCCTGCCGGGCTGATCCATTCTC	591	2	n	6.3e-05	+ + ++++++++ +
chr10:81292591-81293379	751	GCTGCACCGCCCCACCCGGGGATGCGGGGCTTGCAGCG	754	2	n	5.9e-05	++ +++++++ +++
chr11:78697403-78697775	1	CCTCCCCTAGCAAAGCCGGATAGAGCGGAGCCAGCGGCGGACACGCGCAACCAGCCGCCGAGGCCCCGCCCCCGC CTCACACTGACCGGCTGCCCTAGCCAATCCACGCCCACCTGTCCGCGTCCGCCTCCAATCCCTGGCCGGAAGCTT	63	2	n	4.9e-08	+++++++++++ ++
chr11:78697403-78697775	1	CCTCCCCTAGCAAAGCCGGATAGAGCGGAGCCAGCGGCGGACACGCGCAACCAGCCGCCGAGGCCCCGCCCCCGC CTCACACTGACCGGCTGCCCTAGCCAATCCACGCCCACCTGTCCGCGTCCGCCTCCAATCCCTGGCCGGAAGCTT	96	1	n	9.7e-05	+++++++++ +
chr11:78697403-78697775	151	CAGACAGGCGCACTGGTCGACCAGTGGCAACCAGGTGTGGGTCTCCTGGGGAAATCCCGCCCCCGGTTCAGGATG	204	2	n	1.4e-05	++++++++++
chr11:78697403-78697775	226	GGCAGACAGACAGACCAATAAAAAGGCAAATCTTGGCCTGACCGACAAGACTGAAAGCCAATTAAAAATCAAAAA	237	1	n	1.4e-05	+++++++ + +++
chr10:62651210-62651741	76	CTCCCAGAGAGTCGCAGCCTCCCTCGGCCAATGAAAACCTGAGTGGCCCCGATGGGCCCGCCCACGGTCTGAAGT	100	1	n	5.6e-06	++++++++ + ++
chr10:62651210-62651741	76	CTCCCAGAGAGTCGCAGCCTCCCTCGGCCAATGAAAACCTGAGTGGCCCCGATGGGCCCGCCCACGGTCTGAAGT	130	2	n	1.4e-05	+ +++++++++
chr10:62651210-62651741	226	AGTGTTCCCCTCCCCCCGCTCGGAACGCCTCCCTTCCCAGCATGCCCTGCAACGCTCGCGCAGCCCCCTCGCAGG	231	2	n	7.1e-05	++++ ++++++ +
chr10:62651210-62651741	376	CGCGCCGTACAGCCATTCGCCGCCGGAAACTGCAgccctccgccccgcccccgccccgccccgccccCCGCAGTG	417	2	n	4.9e-08	+++++++++++ ++
chr10:62651210-62651741	376	CGCGCCGTACAGCCATTCGCCGCCGGAAACTGCAgccctccgccccgcccccgccccgccccgccccCCGCAGTG	433	2	n	2.2e-08	++++++++++++ +
chr8:70212259-70212973	1	tgcctcagccgcctcagccgctgcagccccgccTCGCGCGGGCCCTAAGCTCGAGGCCGGGAGGGGCCCAGGCCC	26	2	n	5.9e-06	++++++++++ + +
chr8:70212259-70212973	76	TGCCGCCATTGGTCACGCCCTGTCCAATCAGCGCTGGAGACGGCAAGAATTGGTAAGCATGGCACAGACGGGCAT	96	1	n	2.6e-05	++ ++++++++ +
chr8:70212259-70212973	151	CCTTTTTAACCAATCGCTAAAGGAAGGGGCGAGGCTACATGGAGGGGCGGCCCTGGTTCTTCTGAGCGTTCTACA	157	1	n	2.3e-05	++++++++++ +
chr8:70212259-70212973	151	CCTTTTTAACCAATCGCTAAAGGAAGGGGCGAGGCTACATGGAGGGGCGGCCCTGGTTCTTCTGAGCGTTCTACA	172	2	y	9.6e-06	++++++++++ +++
chr8:70212259-70212973	226	CCGGGTACAAGGCGGAGAGGCCTGGTGGGGGGCGTTCAAGAATTGGAACCCGCAGAAAATGGGCAGAGCTTCCGG	230	2	y	9.3e-05	+ + ++++++ +
chr8:70212259-70212973	301	CCAATTGCCAAGGGGTATAGGCGGAGCTAAGAGGAAAGGCGGCTCTTGGTTTCTGAGAATTCGGGGCACAAGGAG	314	2	y	5.3e-06	++ ++++++++ ++
chr8:70212259-70212973	376	ACAGAAGCGAGGATTGGATTCTGCAGAAAACAAGCAACGCTTTGGGCCAATAACTGAAGGGAGGGGGCGGGGCCT	435	2	y	1.1e-09	++++++++++++++
chr8:70212259-70212973	451	GGAAACAGCCCTCTTAGCCAATCGCTGAAGAGCAAGGTCAGCGCTCTGAGTAAGCTGGCGCGCTGGGCAAGGGCG AAGCTCGAGGATCGGAGGGTGTAGCCCGGAGGGCAACGATGATTGACTGCGACACTAAAGATGTACAGGTCCTGG GACCAATCGCAGAAGCTGTAGGCGGTGCATCTTCCAGGGGTGGGCGCGCTAGGTACAGACCATAACTATCTTGTC	465	1	n	3e-05	++++++++++ +
chr8:70212259-70212973	451	GGAAACAGCCCTCTTAGCCAATCGCTGAAGAGCAAGGTCAGCGCTCTGAGTAAGCTGGCGCGCTGGGCAAGGGCG AAGCTCGAGGATCGGAGGGTGTAGCCCGGAGGGCAACGATGATTGACTGCGACACTAAAGATGTACAGGTCCTGG GACCAATCGCAGAAGCTGTAGGCGGTGCATCTTCCAGGGGTGGGCGCGCTAGGTACAGACCATAACTATCTTGTC	516	2	y	9.9e-05	++ + +++++ ++
chr8:70212259-70212973	451	GGAAACAGCCCTCTTAGCCAATCGCTGAAGAGCAAGGTCAGCGCTCTGAGTAAGCTGGCGCGCTGGGCAAGGGCG AAGCTCGAGGATCGGAGGGTGTAGCCCGGAGGGCAACGATGATTGACTGCGACACTAAAGATGTACAGGTCCTGG GACCAATCGCAGAAGCTGTAGGCGGTGCATCTTCCAGGGGTGGGCGCGCTAGGTACAGACCATAACTATCTTGTC	600	1	n	2.8e-05	+++++++++ ++
chr8:70212259-70212973	451	GGAAACAGCCCTCTTAGCCAATCGCTGAAGAGCAAGGTCAGCGCTCTGAGTAAGCTGGCGCGCTGGGCAAGGGCG AAGCTCGAGGATCGGAGGGTGTAGCCCGGAGGGCAACGATGATTGACTGCGACACTAAAGATGTACAGGTCCTGG GACCAATCGCAGAAGCTGTAGGCGGTGCATCTTCCAGGGGTGGGCGCGCTAGGTACAGACCATAACTATCTTGTC	615	2	y	7.9e-05	+ ++++++++ ++
chr4:148591301-148591624	1	ggAACCCTCCCGCCGCCAGGGCCTCTCCCCACGTGGCCCGGCAGCCGGCCGCACTACCCTGCTGCGGCTGACAGA CAGCACGGCCCAACCAATCACTGCTAGTTGCAGCCCGGGGAGCCAATGAACTCCTGGTGAAGCTGCGGGCCGGCC	67	3	y	1.6e-05	++++ ++++++
chr4:148591301-148591624	1	ggAACCCTCCCGCCGCCAGGGCCTCTCCCCACGTGGCCCGGCAGCCGGCCGCACTACCCTGCTGCGGCTGACAGA CAGCACGGCCCAACCAATCACTGCTAGTTGCAGCCCGGGGAGCCAATGAACTCCTGGTGAAGCTGCGGGCCGGCC	86	1	n	1.4e-05	++++++++++ +
chr4:148591301-148591624	1	ggAACCCTCCCGCCGCCAGGGCCTCTCCCCACGTGGCCCGGCAGCCGGCCGCACTACCCTGCTGCGGCTGACAGA CAGCACGGCCCAACCAATCACTGCTAGTTGCAGCCCGGGGAGCCAATGAACTCCTGGTGAAGCTGCGGGCCGGCC	115	1	n	6.6e-05	+++++++ +
chr4:148591301-148591624	151	CACGCCGCCATTGGAGAGCCGGGGTCCCGCCCCTCCGTAGGCCCCGCCCCCGAGCGGGTTAGGTTGCGGCGCGGG	174	2	n	3.4e-07	+++++++++++++
chr4:148591301-148591624	151	CACGCCGCCATTGGAGAGCCGGGGTCCCGCCCCTCCGTAGGCCCCGCCCCCGAGCGGGTTAGGTTGCGGCGCGGG	191	2	n	9e-07	+++++++++++
chr4:148591301-148591624	301	TCGGCCCGCCCGCCCGCCATGGA	303	2	n	3.1e-05	+ +++++++ +++
chr8:85840663-85841071	301	CGCGCGAgggggcggggccgggccggccTCGCTGACTGGCAGCTGGGGTGGTGGGCACTGTGCGATGGCGGGGGC	305	2	y	7.9e-09	+++++++++++++
chr8:85840663-85841071	301	CGCGCGAgggggcggggccgggccggccTCGCTGACTGGCAGCTGGGGTGGTGGGCACTGTGCGATGGCGGGGGC	331	3	y	8.4e-06	++++++ +++++
chr7:4739696-4740267	1	TAGGGTGATGGGCGGAGGCCTTAACGAATGGAAGCGTGGTCCTGTCCAAGGCCAACCAATAATATACGAAGTTTG	5	2	y	3.8e-05	+ +++++++++ +
chr7:4739696-4740267	1	TAGGGTGATGGGCGGAGGCCTTAACGAATGGAAGCGTGGTCCTGTCCAAGGCCAACCAATAATATACGAAGTTTG	53	1	n	3.3e-05	++++++++ + +
chr7:4739696-4740267	151	GCTCTTTAAGCCAATGAAAGCACTGATTTGGGACAGTGCAGAAGAAGAGGCGGGACAGATTTTTATGGCAACGCC TGAATGACAGCGACCCGAGCCATTGGCTGTAGTTCGCTGGATTTATTGACAGAGTGGGCGTGGAGGGGTTTTGTC	158	1	n	8.3e-06	+++++++ + ++
chr7:4739696-4740267	151	GCTCTTTAAGCCAATGAAAGCACTGATTTGGGACAGTGCAGAAGAAGAGGCGGGACAGATTTTTATGGCAACGCC TGAATGACAGCGACCCGAGCCATTGGCTGTAGTTCGCTGGATTTATTGACAGAGTGGGCGTGGAGGGGTTTTGTC	193	2	y	1.4e-06	+++++++++++++
chr7:4739696-4740267	151	GCTCTTTAAGCCAATGAAAGCACTGATTTGGGACAGTGCAGAAGAAGAGGCGGGACAGATTTTTATGGCAACGCC TGAATGACAGCGACCCGAGCCATTGGCTGTAGTTCGCTGGATTTATTGACAGAGTGGGCGTGGAGGGGTTTTGTC	224	3	y	1.5e-05	+ +++ +++++++
chr7:4739696-4740267	151	GCTCTTTAAGCCAATGAAAGCACTGATTTGGGACAGTGCAGAAGAAGAGGCGGGACAGATTTTTATGGCAACGCC TGAATGACAGCGACCCGAGCCATTGGCTGTAGTTCGCTGGATTTATTGACAGAGTGGGCGTGGAGGGGTTTTGTC	276	2	y	8.4e-05	+++++++++ ++
chr7:4739696-4740267	301	AGGGCACCGACTGGGGCCAGAAGAGGCGGGAAAAAGAGAGCAATGAGAGTCAGCCAATAAGAACAGCGCGAGTTT	319	2	y	8.8e-06	++++++++++++
chr7:4739696-4740267	301	AGGGCACCGACTGGGGCCAGAAGAGGCGGGAAAAAGAGAGCAATGAGAGTCAGCCAATAAGAACAGCGCGAGTTT	351	1	n	6.6e-07	++++++++ ++++
chr7:4739696-4740267	451	GCGGCGGCTGTGTCGGACGAGAGCCGGAGGAGGCGGTGGGTGGAGGTGGCGGCTGCAACGCGGGTTCCTGAGGAG	483	2	y	9.9e-05	+ ++++++ ++ +
chr5:35893216-35893530	1	GGTGCCGGCTCGGACCCACGGCCCCGCCCAGCCTCTCTTTGTTCCTCCTGGCCCCGCCCCCTCCGCCCAACTCCC	21	2	n	5.9e-06	++++++++++ ++
chr5:35893216-35893530	1	GGTGCCGGCTCGGACCCACGGCCCCGCCCAGCCTCTCTTTGTTCCTCCTGGCCCCGCCCCCTCCGCCCAACTCCC	51	2	n	1.1e-09	++++++++++++++
chr5:35893216-35893530	76	TAACCATTGGCTAGAGGGCGGGTTCTTGCTGTTCAGGGGGCGGGGCTATGGAGGCAGGCGGGGCCTGTCGCGCCT	86	2	y	4.6e-05	++ +++++++
chr5:35893216-35893530	76	TAACCATTGGCTAGAGGGCGGGTTCTTGCTGTTCAGGGGGCGGGGCTATGGAGGCAGGCGGGGCCTGTCGCGCCT	108	2	y	6.6e-07	++++++++++++
chr5:35893216-35893530	76	TAACCATTGGCTAGAGGGCGGGTTCTTGCTGTTCAGGGGGCGGGGCTATGGAGGCAGGCGGGGCCTGTCGCGCCT	126	2	y	1.3e-05	+ ++ +++++++++
chr5:35893216-35893530	226	CGCAGGGCCCCGCCCCGGGCTCCATTGTTGAGGCAGCGGGCGCTCCGCGGGCTGCGCTCCTCTCGGCCGTCCAGT	232	2	n	5.9e-06	++++++++++ +
chr10:24149186-24149555	1	AGAGCTTGGCTCCCCAGCAATTTTGCCAGTCCCTCCAAGCTTCAGCTGTCACTGGCCAATGGGAGAGACGCAAGC CCCGCCTCCTCCTTCCTGGGGCTGTGCCCCGAGCATGCGCAGTGGGCGTGCTTGTGCCGCCGCCCATCAGCTGAG	53	1	n	1.2e-05	++++++++ ++++
chr10:24149186-24149555	1	AGAGCTTGGCTCCCCAGCAATTTTGCCAGTCCCTCCAAGCTTCAGCTGTCACTGGCCAATGGGAGAGACGCAAGC CCCGCCTCCTCCTTCCTGGGGCTGTGCCCCGAGCATGCGCAGTGGGCGTGCTTGTGCCGCCGCCCATCAGCTGAG	74	2	n	2.2e-08	++++++++++++++
chr10:24149186-24149555	226	AGAGGAGACTGCAGAGGCGGGGGAGAGGGGGGCGGGAGGGACACCTCAGAACTGCAGCTCGCTAGTGGTTGCTTT	235	2	y	6.3e-05	+ ++++++++++
chr10:24149186-24149555	226	AGAGGAGACTGCAGAGGCGGGGGAGAGGGGGGCGGGAGGGACACCTCAGAACTGCAGCTCGCTAGTGGTTGCTTT	250	2	y	5.3e-06	+ +++++++++++
chr8:69208957-69209219	1	TAAACTCCAACGCCAAAGGAGGGACTCTTGTCACTCAGGCCTCATCAGCCAATGAGAACCTGCAGTCGGAGCGTC	26	3	n	1.7e-05	+ +++++ +++ +
chr8:69208957-69209219	1	TAAACTCCAACGCCAAAGGAGGGACTCTTGTCACTCAGGCCTCATCAGCCAATGAGAACCTGCAGTCGGAGCGTC	46	1	n	5.3e-07	++++++++ ++++
chr8:69208957-69209219	76	ATCGGGGAGGCGGGCTCTTCCGGGCGCCAGGCTCCAGGCTCCGTTCCGAAGCTGGGAAAATGCAAGCGGTTCTTT	78	2	y	1.6e-05	+++++++++++
chr1:180195946-180196299	1	ACACTCTCCGCTTCTGTTTACCTTCTAGCCCGGGTGCGCACGCCGCGCTCCGCTTGCCCCGCCTCCGAGCCCTCC CATTGGCTGAGCCGCTGTTTGTTAGCTGCCCCGATGCCACAGGACGCAGTGGGAGCGTGCTTACCGCGTGCGCAG	56	2	n	3e-06	+++++++++++
chr1:180195946-180196299	1	ACACTCTCCGCTTCTGTTTACCTTCTAGCCCGGGTGCGCACGCCGCGCTCCGCTTGCCCCGCCTCCGAGCCCTCC CATTGGCTGAGCCGCTGTTTGTTAGCTGCCCCGATGCCACAGGACGCAGTGGGAGCGTGCTTACCGCGTGCGCAG	71	1	y	3.3e-06	+++++ ++++++++
chr1:180195946-180196299	151	CTCACAGCCAATAGGGACTGAGGGTGGAATAAAAGCAACCAATGAGAGGCCGCCCTTGAAGGCCGCGGTCCCTAA	155	1	n	3.9e-05	++++++++ ++ +
chr1:180195946-180196299	151	CTCACAGCCAATAGGGACTGAGGGTGGAATAAAAGCAACCAATGAGAGGCCGCCCTTGAAGGCCGCGGTCCCTAA	186	1	n	6.6e-07	++++++++ +++++
chr1:180195946-180196299	226	TCTGCCTGTTAGCTGTCTTTTCTCCCGGGCAGGGAAAAAAGCCTGCAGTTGTTCTGCGCCTGCGTTCTGAAGATT GACAAGCGTTCACCTGGCAGCCACGTGAGGGTCGCCTGGGTACCGACGCTAGC	294	3	y	3.1e-05	++++++++ ++
chr7:143460977-143461296	1	AGCACAGCGCACTCGGCCTGTGGAACGCCCAGCCCGCTGCGCCCCTTTATACGCGCTGGCCCCACCCCCGCGCGC	59	2	n	5.9e-06	+++++ +++++ +
chr7:143460977-143461296	151	GCCCCGCCCACAGAGGCCCTGCCCCCGCGCCACGCTCATTGGCTGCGCGCACACAcccccggggccgggcggggc	151	2	n	3.8e-06	+++++++++++
chr7:143460977-143461296	151	GCCCCGCCCACAGAGGCCCTGCCCCCGCGCCACGCTCATTGGCTGCGCGCACACAcccccggggccgggcggggc	182	1	y	1e-05	+ ++ ++++++++
chr7:143460977-143461296	151	GCCCCGCCCACAGAGGCCCTGCCCCCGCGCCACGCTCATTGGCTGCGCGCACACAcccccggggccgggcggggc	212	2	y	3.1e-05	+++ +++++++++
chr7:143460977-143461296	226	gggTGACGGGCGGGCGCTGATTGGCGGCCGCACGGCGAGCGGGCTGCGCGGGACAAGGGGCGGGGCTCGAGTTAA	241	3	y	2.8e-05	++++++ + +++
chr7:143460977-143461296	226	gggTGACGGGCGGGCGCTGATTGGCGGCCGCACGGCGAGCGGGCTGCGCGGGACAAGGGGCGGGGCTCGAGTTAA	278	2	y	2.8e-07	++++++++++++
chr8:70594121-70594615	76	CAGTGATCGCAGCTGGAGGACTGGGAGAGGGCGGGACAGACAGCCGAGCAGCTCTGAGACCCCCCCCCCCCCCAA	99	2	y	8e-08	++++ +++++++++
chr8:70594121-70594615	151	AAAGCCCCTCGACCAGACATGCCCCACCTCCCTGTCGGTGGCCATCGCTCATTGGCTGCCTGGTGGTACAAGGGT	171	2	n	8.8e-06	+++++ ++++++
chr8:70594121-70594615	151	AAAGCCCCTCGACCAGACATGCCCCACCTCCCTGTCGGTGGCCATCGCTCATTGGCTGCCTGGTGGTACAAGGGT	195	1	y	5.6e-06	+ ++ ++++++++
chr10:52417343-52417757	151	CCCGGTCGCGTCGGAGTTCCCCGGCAGCCAATCAGAACTCTCCATGTACTAACGGGGGCGGGGCTGCGGAGGGCG GAGGAAGATGGCGGCGGGGGCTAGGTGAGGTGTTGGCAGTGGCGAGGGGCTCGGGCGCGGGGGGTGGGGGGACGC	175	1	n	6.2e-08	+++++++++++++
chr10:52417343-52417757	151	CCCGGTCGCGTCGGAGTTCCCCGGCAGCCAATCAGAACTCTCCATGTACTAACGGGGGCGGGGCTGCGGAGGGCG GAGGAAGATGGCGGCGGGGGCTAGGTGAGGTGTTGGCAGTGGCGAGGGGCTCGGGCGCGGGGGGTGGGGGGACGC	201	2	y	6.6e-07	+++++++++++
chr10:52417343-52417757	151	CCCGGTCGCGTCGGAGTTCCCCGGCAGCCAATCAGAACTCTCCATGTACTAACGGGGGCGGGGCTGCGGAGGGCG GAGGAAGATGGCGGCGGGGGCTAGGTGAGGTGTTGGCAGTGGCGAGGGGCTCGGGCGCGGGGGGTGGGGGGACGC	216	2	y	2.3e-05	+ ++ ++++++ +
chr10:52417343-52417757	151	CCCGGTCGCGTCGGAGTTCCCCGGCAGCCAATCAGAACTCTCCATGTACTAACGGGGGCGGGGCTGCGGAGGGCG GAGGAAGATGGCGGCGGGGGCTAGGTGAGGTGTTGGCAGTGGCGAGGGGCTCGGGCGCGGGGGGTGGGGGGACGC	282	2	y	2.8e-05	+ ++++++ ++++
chr11:69408680-69409788	1	GTCCTCTCACAGCTTCAAGAGCTTCAGAAATTTAGCCAATCACAAGACTTCTCTATCCACAGAAAGCCAATCATC ACCCTTGTCTCCGCCTCAGTAACAGCCTAGCAGGAACCAATAGGAGTAAGGTTAGCCGGGCACTGAGCGGCCTCA	33	1	n	2.1e-07	++++++++++ +++
chr11:69408680-69409788	1	GTCCTCTCACAGCTTCAAGAGCTTCAGAAATTTAGCCAATCACAAGACTTCTCTATCCACAGAAAGCCAATCATC ACCCTTGTCTCCGCCTCAGTAACAGCCTAGCAGGAACCAATAGGAGTAAGGTTAGCCGGGCACTGAGCGGCCTCA	64	1	n	2.1e-05	+++++++++ +
chr11:69408680-69409788	1	GTCCTCTCACAGCTTCAAGAGCTTCAGAAATTTAGCCAATCACAAGACTTCTCTATCCACAGAAAGCCAATCATC ACCCTTGTCTCCGCCTCAGTAACAGCCTAGCAGGAACCAATAGGAGTAAGGTTAGCCGGGCACTGAGCGGCCTCA	109	1	n	2.1e-05	+++++++ ++++
chr11:69408680-69409788	526	CCAGGCCCTCCCGCGCCTCTATCAGAATGCTCCACCTCCAGCGCCTGACCCCGTCCTATATCATGGTCAAGTCCC	554	2	n	2.8e-05	++ ++ +++++ +
chr11:69408680-69409788	751	TCCTCTGTGCCCTTTCCCTGCCGGGGCCACGCGGTTCCCCACGGCCCACGTGGCCCCCACCCCCCCCAAGGGAGG	804	2	n	1.8e-05	++++ ++++++++
chr11:69408680-69409788	901	CGGGAGGGAGAGGAGGGCGGGGCCCAACAGGCAGTGACATCACCCCTGTCCCACTCTCACCGCCTACTCCCTTAA	910	2	y	8e-08	+ ++ +++++++++
chr11:69408680-69409788	901	CGGGAGGGAGAGGAGGGCGGGGCCCAACAGGCAGTGACATCACCCCTGTCCCACTCTCACCGCCTACTCCCTTAA	957	2	n	9.3e-05	+ +++++++++++
chr8:18846133-18846710	1	TCTTCCCGGGCTCATCCCCAGCCAGCATTCGCAGTCGAGCATGCGTCGTGACGAGGCCAAGGGACCGAGCCAATC AGAACACGTATTACGCCCATAAGTCGGCCAATCAGGAGGCGCCTTATTACCCGGGAGCCTTGCTTCACCCCGCCT CCCCGCTGACAAGCACGGGTCGCGCGGAGCAAAGCGAGCACCCCGAGGCGAGTGCGCCCGGCAAGCCGAGGCGTG	67	1	n	5.3e-07	++++++++++++
chr8:18846133-18846710	1	TCTTCCCGGGCTCATCCCCAGCCAGCATTCGCAGTCGAGCATGCGTCGTGACGAGGCCAAGGGACCGAGCCAATC AGAACACGTATTACGCCCATAAGTCGGCCAATCAGGAGGCGCCTTATTACCCGGGAGCCTTGCTTCACCCCGCCT CCCCGCTGACAAGCACGGGTCGCGCGGAGCAAAGCGAGCACCCCGAGGCGAGTGCGCCCGGCAAGCCGAGGCGTG	100	1	n	1.4e-05	+++++++++++ ++
chr8:18846133-18846710	1	TCTTCCCGGGCTCATCCCCAGCCAGCATTCGCAGTCGAGCATGCGTCGTGACGAGGCCAAGGGACCGAGCCAATC AGAACACGTATTACGCCCATAAGTCGGCCAATCAGGAGGCGCCTTATTACCCGGGAGCCTTGCTTCACCCCGCCT CCCCGCTGACAAGCACGGGTCGCGCGGAGCAAAGCGAGCACCCCGAGGCGAGTGCGCCCGGCAAGCCGAGGCGTG	142	2	n	2.6e-06	++++++++++++
chr8:18846133-18846710	226	CCCTTTCCAAGGCGGCGAGCAGAGGCCGTCACTGTccccgccgggtcccgggcccccgcggcccatgctgggggc ggagccagggcggagggcggcggcgcggccggccccgcgcAGTGATTGGCGGGCGGCCGGCGGTGGCTGAGGTCC	292	2	y	9e-07	+ ++++++++ ++
chr8:18846133-18846710	226	CCCTTTCCAAGGCGGCGAGCAGAGGCCGTCACTGTccccgccgggtcccgggcccccgcggcccatgctgggggc ggagccagggcggagggcggcggcgcggccggccccgcgcAGTGATTGGCGGGCGGCCGGCGGTGGCTGAGGTCC	341	3	y	2.8e-05	+++++++ + +++
chr15:81926167-81926513	1	CGGGAGCCACGCGCGTCCAGCAACGCTGCGCTTGCCAAACCAAATCAACTCAGCTTCCGGAAAACTGACCAATAA GAAGCATCTGCCCGCCCCTGCGGGTCGCAGAGCTTCGCGAGGCTCCCGTGAGGGGCGGGGCCGGAAGGTGGGCGG GGCCGCCAGCACTCTCCCGCAAGTGAGAGAAGAGGGGCGGGGTAGAGTGCCGAAAGGGCGGGGCCCCATCCTGAA	66	1	n	1.9e-06	++++++++ +++++
chr15:81926167-81926513	1	CGGGAGCCACGCGCGTCCAGCAACGCTGCGCTTGCCAAACCAAATCAACTCAGCTTCCGGAAAACTGACCAATAA GAAGCATCTGCCCGCCCCTGCGGGTCGCAGAGCTTCGCGAGGCTCCCGTGAGGGGCGGGGCCGGAAGGTGGGCGG GGCCGCCAGCACTCTCCCGCAAGTGAGAGAAGAGGGGCGGGGTAGAGTGCCGAAAGGGCGGGGCCCCATCCTGAA	84	2	n	2.3e-05	+++++++++ +
chr15:81926167-81926513	1	CGGGAGCCACGCGCGTCCAGCAACGCTGCGCTTGCCAAACCAAATCAACTCAGCTTCCGGAAAACTGACCAATAA GAAGCATCTGCCCGCCCCTGCGGGTCGCAGAGCTTCGCGAGGCTCCCGTGAGGGGCGGGGCCGGAAGGTGGGCGG GGCCGCCAGCACTCTCCCGCAAGTGAGAGAAGAGGGGCGGGGTAGAGTGCCGAAAGGGCGGGGCCCCATCCTGAA	123	2	y	1.5e-07	+ ++++++++++++
chr15:81926167-81926513	1	CGGGAGCCACGCGCGTCCAGCAACGCTGCGCTTGCCAAACCAAATCAACTCAGCTTCCGGAAAACTGACCAATAA GAAGCATCTGCCCGCCCCTGCGGGTCGCAGAGCTTCGCGAGGCTCCCGTGAGGGGCGGGGCCGGAAGGTGGGCGG GGCCGCCAGCACTCTCCCGCAAGTGAGAGAAGAGGGGCGGGGTAGAGTGCCGAAAGGGCGGGGCCCCATCCTGAA	140	2	y	4e-07	++++++++++++
chr15:81926167-81926513	1	CGGGAGCCACGCGCGTCCAGCAACGCTGCGCTTGCCAAACCAAATCAACTCAGCTTCCGGAAAACTGACCAATAA GAAGCATCTGCCCGCCCCTGCGGGTCGCAGAGCTTCGCGAGGCTCCCGTGAGGGGCGGGGCCGGAAGGTGGGCGG GGCCGCCAGCACTCTCCCGCAAGTGAGAGAAGAGGGGCGGGGTAGAGTGCCGAAAGGGCGGGGCCCCATCCTGAA	180	2	y	3.8e-06	+++++++++++
chr15:81926167-81926513	1	CGGGAGCCACGCGCGTCCAGCAACGCTGCGCTTGCCAAACCAAATCAACTCAGCTTCCGGAAAACTGACCAATAA GAAGCATCTGCCCGCCCCTGCGGGTCGCAGAGCTTCGCGAGGCTCCCGTGAGGGGCGGGGCCGGAAGGTGGGCGG GGCCGCCAGCACTCTCCCGCAAGTGAGAGAAGAGGGGCGGGGTAGAGTGCCGAAAGGGCGGGGCCCCATCCTGAA	201	2	y	1.9e-07	+++ +++++++++
chr5:36988877-36989322	1	TGGGCCTCCCAGCCCGCCGCGAAGTTGCTCCGAAACCGCGGAGATTGCAGCGGCCAGCTGAGCAGGCGGAGCGCG	59	2	y	7.9e-05	+++ ++++++ ++
chr5:36988877-36989322	76	CGGCCCTACATTCAGCGCGGCCCCGGGAAAGGGGGCGGGGCCTGGGCGGGGCCTCTGCCACCCTCCATTCCTGCT	103	2	y	6.4e-08	++++++++++++
chr5:36988877-36989322	151	GCGACCCAGGGAGACTCGGCTCGTTAAGTCGCCGGCAAGCCTGCCAATCACTATGTGCTGTCGCGAATCACGGAG	189	3	n	4e-06	+++++ +++++++
chr5:36988877-36989322	226	CGCCTCGCCTTGCAGCGACTTGCTCTCTTGGGTCGCCAGGAGGACAGATGGCGGCGAGAGGGCGGGTCTGGCCGG	280	2	y	5.3e-06	+++ +++++++ +
chr5:36988877-36989322	301	CCCACAGCTTAAGTTTCCGAGTGGACTCGGCCCCGGCCCTGCCCCCTCGCCGCCCCGCCTCCAGGACATCTCTTT	352	2	n	1e-06	+++++++++++
chr5:135744159-135744499	76	CTCGCGCCGCCGTGACTGCCAACGGGAAAAGGCCCGGCGTAATCTGCGCGTGAGCCCCGCCCCTAGGAGCAGCCA ATCAGAGCCAGGGACGAGAGCTGGGCGGGGACATGGGCCCGCAGGGCGTCTCCTCGAATTGAGACCAGAGCTGGG	129	2	n	5.6e-07	+++++++++++
chr5:135744159-135744499	76	CTCGCGCCGCCGTGACTGCCAACGGGAAAAGGCCCGGCGTAATCTGCGCGTGAGCCCCGCCCCTAGGAGCAGCCA ATCAGAGCCAGGGACGAGAGCTGGGCGGGGACATGGGCCCGCAGGGCGTCTCCTCGAATTGAGACCAGAGCTGGG	145	1	n	1.2e-07	+++++++++++++
chr5:135744159-135744499	76	CTCGCGCCGCCGTGACTGCCAACGGGAAAAGGCCCGGCGTAATCTGCGCGTGAGCCCCGCCCCTAGGAGCAGCCA ATCAGAGCCAGGGACGAGAGCTGGGCGGGGACATGGGCCCGCAGGGCGTCTCCTCGAATTGAGACCAGAGCTGGG	168	2	y	1.6e-05	+ + +++++++++
chr17:80290041-80290365	76	CTGGGTTCAGCTTCCCTCTTGGACCTCACCCGCAGCAGCCGCCCCGCCCAGGTGTCTTCTGATTGGCTTCTTGCA	116	2	n	1.5e-05	++++++++++
chr17:80290041-80290365	76	CTGGGTTCAGCTTCCCTCTTGGACCTCACCCGCAGCAGCCGCCCCGCCCAGGTGTCTTCTGATTGGCTTCTTGCA	131	1	y	3.7e-07	+++++++++++++
chr17:80290041-80290365	226	CCAGCCTGCCGAGCTGGCGAGCCTAGGGGAATCGCAGAGTCGCGAAAGCCTGTCCTTCACGTCTCCATCAAGTGA	273	3	n	1.5e-05	+++++++ +++++
chr6:83121388-83121807	1	atcactccgcggccgGAGCTCCCGGCCGGGGAGAGCACCTCCAGAGGACACAGTTGCTCAGTCCAGCCAATCAGA ATCGCTAACTAACAGATCAGCCAATAGGAACCGGTCACAGGTTTCTCCTTTTGCCCAATCCGCAGCGGCGCCTGT	64	1	n	2.1e-07	+++++++++++++
chr6:83121388-83121807	1	atcactccgcggccgGAGCTCCCGGCCGGGGAGAGCACCTCCAGAGGACACAGTTGCTCAGTCCAGCCAATCAGA ATCGCTAACTAACAGATCAGCCAATAGGAACCGGTCACAGGTTTCTCCTTTTGCCCAATCCGCAGCGGCGCCTGT	93	1	n	3.3e-06	++++++++ ++++
chr6:83121388-83121807	151	GCCGCTCTCCCAGACAACAAGAACTCACACAGACAAAGACAGGGGAAAGGCTCGACCAAATGCCTGACTGACAGC AACAATAGCCAGTACGGACAACAGAACAAGCTTTGACTTATCGGCCAATGAACGGCCGTTCAGCACAAAAATTTT CGCCGATTGGCTGAATGACTTTACACACTCAGGTTCAGACTCCGCCGGCTTCCCACTCCAGCAATTCGATACAAG	213	3	y	7.2e-07	+ +++++++++++
chr6:83121388-83121807	151	GCCGCTCTCCCAGACAACAAGAACTCACACAGACAAAGACAGGGGAAAGGCTCGACCAAATGCCTGACTGACAGC AACAATAGCCAGTACGGACAACAGAACAAGCTTTGACTTATCGGCCAATGAACGGCCGTTCAGCACAAAAATTTT CGCCGATTGGCTGAATGACTTTACACACTCAGGTTCAGACTCCGCCGGCTTCCCACTCCAGCAATTCGATACAAG	267	1	n	2.1e-05	++++++++ + ++
chr6:83121388-83121807	151	GCCGCTCTCCCAGACAACAAGAACTCACACAGACAAAGACAGGGGAAAGGCTCGACCAAATGCCTGACTGACAGC AACAATAGCCAGTACGGACAACAGAACAAGCTTTGACTTATCGGCCAATGAACGGCCGTTCAGCACAAAAATTTT CGCCGATTGGCTGAATGACTTTACACACTCAGGTTCAGACTCCGCCGGCTTCCCACTCCAGCAATTCGATACAAG	300	1	y	6.5e-06	+ +++++++++++
chr11:76846864-76847276	151	CGGGAGGCGGCAGCCCGCCGGATCCCCTCCGCGCCTAGCAACCCCATCCCGCCTTCCAGCCTTAGCCAATCGTAG CCTTGAATGCTTGGGTGTCACTCTAGGGGGCGGGGCTTTCCTTAAAGCGGACGATTTTCCCTCTGGGCGTGTCTC	196	2	n	2.4e-05	++++++++ ++
chr11:76846864-76847276	151	CGGGAGGCGGCAGCCCGCCGGATCCCCTCCGCGCCTAGCAACCCCATCCCGCCTTCCAGCCTTAGCCAATCGTAG CCTTGAATGCTTGGGTGTCACTCTAGGGGGCGGGGCTTTCCTTAAAGCGGACGATTTTCCCTCTGGGCGTGTCTC	213	1	n	8.3e-06	++++++++++ ++
chr11:76846864-76847276	151	CGGGAGGCGGCAGCCCGCCGGATCCCCTCCGCGCCTAGCAACCCCATCCCGCCTTCCAGCCTTAGCCAATCGTAG CCTTGAATGCTTGGGTGTCACTCTAGGGGGCGGGGCTTTCCTTAAAGCGGACGATTTTCCCTCTGGGCGTGTCTC	248	2	y	9.9e-08	++++++++++++
chr11:76846864-76847276	301	CACTCCAGTCCTTAGGGACTTTAGTCGCTTTCCTTTCCTCCACTAAGGTTCTACCCTCTGTCTTCCCGCCTCCCT ATTTCCTCTTCTACTTCTCTCgttttgttttgttttg	363	2	n	2.4e-05	+++++++++++
chr11:103966375-103966872	1	TGGGTTGGTCAGAATGCTCCCCGGGTTAGTTCAATCCGTGAAAAGTACCAGAGTTGATTGGCAGGGCAAATAGAA	53	3	y	1.1e-05	+++++++ ++++
chr11:103966375-103966872	76	AACCCTTTTGCTTTTCTGATTGGTCGTCTGTGGCTTCGGGTGGGGCATGTGGGCGCGTCTCTCCCGAATGCGGTG	88	1	y	6.6e-07	+++++++++++++
chr11:103966375-103966872	151	AGCTCCCATTGGAAGATGAAACCGGCATTTCCAGAGCGTGGTACCGTCGCCTAGGTCGCGGGGGGGCGGACCTAC	209	2	y	5.3e-06	++++++++++ +
chr11:103966375-103966872	226	TCCCGTCCAGCCTTATTGCCATTTCCATTGGTCAGATTTTTTGTCATTCAAGTAACTTCGCGGACATAGGCGCAA	246	1	y	2.3e-05	++ + ++++++++
chr11:103966375-103966872	226	TCCCGTCCAGCCTTATTGCCATTTCCATTGGTCAGATTTTTTGTCATTCAAGTAACTTCGCGGACATAGGCGCAA	264	3	n	8.3e-05	+++++ +++++
chr11:103966375-103966872	301	GAGTTCCCAGGAGGCGGCGGATGATTGGTTGGTTGCTGTTCCCGCCCCCAGCCAGTCGCCATTTTATTGAGGCAA	318	1	y	8e-05	+ ++++++++++
chr11:103966375-103966872	301	GAGTTCCCAGGAGGCGGCGGATGATTGGTTGGTTGCTGTTCCCGCCCCCAGCCAGTCGCCATTTTATTGAGGCAA	339	2	n	3e-06	++++++++++ +
chr11:106084136-106084695	1	AGGGTTCCGCAACTGAGCAGAGGGTTGTGGGCGGAGCCTCAAGCCGGAGCAGTGATTGGAGCAGCCCACACCTTG	24	2	y	3e-06	+ ++++++++ ++
chr11:106084136-106084695	76	GCCAGAGAGGCTGAGAGCGCCAGCTAGCGACACTCCGCGGCGGGTACTCAGCGCTCTCTCCGTGATTGGCTAGGC	134	1	y	1.9e-05	+ ++++++++++
chr11:106084136-106084695	151	GCGAGAGGACGGGCGCTGTCTCAGTGATTGGCAGGCTCTAGCCAGCCCTCGGAAATCGCCTTGACTTCGCCCATT	173	3	y	4e-06	+++++++ +++++
chr11:106084136-106084695	226	GGCATCCTGTGAGAGTAGGCGGGATTGGTCCGTCGTGATTAGCTGGCGGATGAGAGTGAGGGCGTTGGGAGAGAG	237	2	y	1.1e-05	++++++++++++
chr11:106084136-106084695	301	CGGGGAGGAGGAGGCGGGAGTATCTGACTTCCTCCTGGTTATTGGCTGGTAATGAGAGTGGGGGTAGTGCCAAGG	307	2	y	6.5e-06	+++++++++++++
chr11:106084136-106084695	301	CGGGGAGGAGGAGGCGGGAGTATCTGACTTCCTCCTGGTTATTGGCTGGTAATGAGAGTGGGGGTAGTGCCAAGG	335	1	y	9.3e-06	++ + ++++++++
chr11:106084136-106084695	376	CCCAGCGGCTGCATGCGATTGGCAGATGCTGGCATGAGTGACAGGCTGCAAGGCTTGCTGCGCGCCCAGCGGTTT	389	3	y	0.0001	+ +++++ +++ +
chr11:106084136-106084695	376	CCCAGCGGCTGCATGCGATTGGCAGATGCTGGCATGAGTGACAGGCTGCAAGGCTTGCTGCGCGCCCAGCGGTTT	408	3	y	5.5e-07	+ +++ ++++++++
chr3:136669807-136670277	76	GGCGGTGGAGGCAGCAGGCCCACGGGACTGACTGGCACCCTGAAGAAAACAGAGCAGGGGGCGGGGCGGTCACCC	102	3	y	0.0001	++++++ ++ ++
chr3:136669807-136670277	76	GGCGGTGGAGGCAGCAGGCCCACGGGACTGACTGGCACCCTGAAGAAAACAGAGCAGGGGGCGGGGCGGTCACCC	129	2	y	7.9e-09	+ ++++++++++++
chr3:136669807-136670277	151	AGACCACCGCCTTAGCGATGAGGGACGCGCTCTCCAGCCAATGAGCTTGCGAGGTGCAACGTggggcgggcccta	185	1	n	3.6e-05	++++++++ ++
chr3:136669807-136670277	151	AGACCACCGCCTTAGCGATGAGGGACGCGCTCTCCAGCCAATGAGCTTGCGAGGTGCAACGTggggcgggcccta	209	2	y	2.1e-05	+ ++++++++ +
chr3:136669807-136670277	226	aggcggaccccgaggaggaggtggccagggcgctggaggcgggggcggtgaggaggaaggggaggaggcggaggc	257	2	y	1.2e-05	+ ++++++++++
chr3:136669807-136670277	226	aggcggaccccgaggaggaggtggccagggcgctggaggcgggggcggtgaggaggaaggggaggaggcggaggc	286	2	y	1.3e-05	+++++++++++ +
chr3:136669807-136670277	301	gggcgcggtggtggcggcggccggcgcggcggcggaggcgaggTTGTGCCCCGGACTGTGTCCACCGAGCTCAGC	331	2	y	9.9e-05	++ +++++++ ++
chr12:81781165-81781498	1	tcccctccccgccccgtgcgccccgcctcccgcacgcccgGGACCACCTGACGCGAGCCTGGCTCCGCCCCAGCC	6	2	n	8.8e-06	+++++++++ + +
chr12:81781165-81781498	1	tcccctccccgccccgtgcgccccgcctcccgcacgcccgGGACCACCTGACGCGAGCCTGGCTCCGCCCCAGCC	20	2	n	1.9e-07	++++++++++++ +
chr12:81781165-81781498	1	tcccctccccgccccgtgcgccccgcctcccgcacgcccgGGACCACCTGACGCGAGCCTGGCTCCGCCCCAGCC	62	2	n	8.8e-06	++ +++++++ ++
chr12:81781165-81781498	76	CTGCGGACCCGGGGGCGGGGCCTCCAGGATGGGCCCGCCTCCACAGCCAACCCATCCTCCCATTGGCCCGCCGCG GCTGTCCGTCTCCTGAGGGTGGCTGAGACCTCATTGGGTGGCTCCCGAAGGTGAGACCCAGCGTGCGTTCGGACA	83	2	y	5.6e-07	+++++++++++
chr12:81781165-81781498	76	CTGCGGACCCGGGGGCGGGGCCTCCAGGATGGGCCCGCCTCCACAGCCAACCCATCCTCCCATTGGCCCGCCGCG GCTGTCCGTCTCCTGAGGGTGGCTGAGACCTCATTGGGTGGCTCCCGAAGGTGAGACCCAGCGTGCGTTCGGACA	107	2	n	1.6e-05	+ +++++++++ +
chr12:81781165-81781498	76	CTGCGGACCCGGGGGCGGGGCCTCCAGGATGGGCCCGCCTCCACAGCCAACCCATCCTCCCATTGGCCCGCCGCG GCTGTCCGTCTCCTGAGGGTGGCTGAGACCTCATTGGGTGGCTCCCGAAGGTGAGACCCAGCGTGCGTTCGGACA	131	1	y	2.3e-05	+++++ +++++++
chr12:81781165-81781498	76	CTGCGGACCCGGGGGCGGGGCCTCCAGGATGGGCCCGCCTCCACAGCCAACCCATCCTCCCATTGGCCCGCCGCG GCTGTCCGTCTCCTGAGGGTGGCTGAGACCTCATTGGGTGGCTCCCGAAGGTGAGACCCAGCGTGCGTTCGGACA	150	3	n	1.7e-05	+++++++ +++ +
chr4:122955459-122955751	76	TGGGAGTAACCCTGTGCCGGCATCGCGTCAGGCAGCGGCCTCCCATTGGCTGGGCCTCATGAGGCGATGTGGGAG	114	1	y	3.3e-06	+++++ ++++++++
chr4:122955459-122955751	151	CGGGGCCCCGCCCTCCACCAGCTGCCAAGAGGCCGGCACAGGGCCAAGTCTCGCAGGCTGGCTCTCAGGACTCCC	155	2	n	2.3e-07	+++++++++ ++ +
chr1:23256063-23256367	1	CAGGTCCCACCTCTGGGCTCTGAGCGGTTCGCTCTTCGAGGATCAGGGCGGGTGTGTAGCCGGAGTCGCTTCCTA TTGGCCGACTTGCCGGGCGTCCGGACATCTGATTGGACGGCCCCGCCTCCCCACGGGCTGAGCTCATTGGACGGC	4	2	n	5.2e-05	+++++ +++++
chr1:23256063-23256367	1	CAGGTCCCACCTCTGGGCTCTGAGCGGTTCGCTCTTCGAGGATCAGGGCGGGTGTGTAGCCGGAGTCGCTTCCTA TTGGCCGACTTGCCGGGCGTCCGGACATCTGATTGGACGGCCCCGCCTCCCCACGGGCTGAGCTCATTGGACGGC	69	1	y	8.3e-06	+++++ ++++++++
chr1:23256063-23256367	1	CAGGTCCCACCTCTGGGCTCTGAGCGGTTCGCTCTTCGAGGATCAGGGCGGGTGTGTAGCCGGAGTCGCTTCCTA TTGGCCGACTTGCCGGGCGTCCGGACATCTGATTGGACGGCCCCGCCTCCCCACGGGCTGAGCTCATTGGACGGC	101	1	y	2.8e-05	+ +++++++++ ++
chr1:23256063-23256367	1	CAGGTCCCACCTCTGGGCTCTGAGCGGTTCGCTCTTCGAGGATCAGGGCGGGTGTGTAGCCGGAGTCGCTTCCTA TTGGCCGACTTGCCGGGCGTCCGGACATCTGATTGGACGGCCCCGCCTCCCCACGGGCTGAGCTCATTGGACGGC	115	2	n	1.6e-06	+++++++++++++
chr1:23256063-23256367	151	GCCAGCCGAGGGGGCGGGGCGCGTTCCCCCCGGGTTCTTGAGCGAGCGCGCCGGGCCGCTGAGCCGGGCTGAGGC	157	2	y	7.9e-09	+++++++++++++
chr9:101034527-101035091	1	TAGGTTCTCCAGGTGGACGTTCTCGCCGCGCCCCTCCCAGGCGCAGCGCCTATTGGCTGGGAGGCTCGTGCGCCG	46	1	y	1.8e-05	+ ++ ++++++++
chr9:101034527-101035091	76	CGAGCCCGGCGCGCTGTGATAGGGCGGGAGCGGAGGGGGCGGGACGCACTGGCGCCCGTGACTCACTCGCTTGTG	92	2	y	9.9e-05	++ ++++++++
chr9:101034527-101035091	76	CGAGCCCGGCGCGCTGTGATAGGGCGGGAGCGGAGGGGGCGGGACGCACTGGCGCCCGTGACTCACTCGCTTGTG	107	2	y	1.3e-08	++++++++++++++
chr9:101034527-101035091	451	AGCAGTCACAGGCTTGCATTCAGGCTCAAGGCGGTCCTGTTCTAGGAAATACCTGCCTCTCAGCTCTGTGCCCGT	501	3	n	7.7e-05	+++++ + +++
chr13:51644921-51645502	76	CCGGCCCCCAGAGCCCCGGATACCTCATCTCGTGTCCGCCCACCACCCAACGGTTCTGCCCCCAGGCACGTTCTA	108	2	n	4.3e-05	+++++++++ +
chr13:51644921-51645502	151	AACCACTGCGCACGCGCTGCGAGGCACTTAACGACTCGGCTCCGCCCTTCTCAATATCTCTTGGGGTCGCCGGGC	189	2	n	2e-06	++ ++++++ ++ +
chr13:51644921-51645502	226	GCTCCTCGCTGAATCGTTAGCCAATCCTTACTCCCGCCCTCGCAATCTTGCAACAGGCTTCTGATTGGTTACCTG	256	2	n	6.3e-05	++++++++ + +
chr13:51644921-51645502	226	GCTCCTCGCTGAATCGTTAGCCAATCCTTACTCCCGCCCTCGCAATCTTGCAACAGGCTTCTGATTGGTTACCTG	283	1	y	9.3e-09	++++++++++++++
chr5:74092858-74093294	1	AGCCTCAACGCTTCCAACACCGCAGTGGGTGGAGAACCTGCTGCTGGAAGTCAACGGCCCCACCCTACCGGGTCC	22	2	y	4.3e-05	+ ++++++ ++ +
chr5:74092858-74093294	1	AGCCTCAACGCTTCCAACACCGCAGTGGGTGGAGAACCTGCTGCTGGAAGTCAACGGCCCCACCCTACCGGGTCC	57	2	n	2.8e-05	+++++ +++ ++
chr5:74092858-74093294	76	GAAACGTCCCGACGATTGGCTTCCCATACCAGCCACGCCTACAATCCTTCTGACGATTGGCTGCTCTCCTTTTCC	84	1	y	4.9e-05	++ +++++++++
chr5:74092858-74093294	76	GAAACGTCCCGACGATTGGCTTCCCATACCAGCCACGCCTACAATCCTTCTGACGATTGGCTGCTCTCCTTTTCC	125	1	y	1.8e-05	++ ++++++++++
chr5:74092858-74093294	151	TGTTCTGCCCCCTCCAAGCGGCCCTCTGATTGGTTGCAGGTCTCGGGGGGGGGGGGCAGCTCCGCCCCTCTCCCG	173	1	y	6.8e-08	++++++++++++++
chr5:74092858-74093294	151	TGTTCTGCCCCCTCCAAGCGGCCCTCTGATTGGTTGCAGGTCTCGGGGGGGGGGGGCAGCTCCGCCCCTCTCCCG	209	2	n	7.6e-07	++ +++++++++ +
chr5:74092858-74093294	301	GGTGTCAGGATGTCCCCGTGTCCCCTCGAGCTTTGCCCGCCCCGAGCTCAGCTGCTCCCGGCGGCCAGAACGGAG	334	2	n	5.9e-05	++++++++ +
chr2:121448996-121449522	1	cgtcccgtccccgccccgcccctccccCGCGTTCCTTCGGGGCGACTTTGTCAGTCAGTACCCTAAACTGTCCCA	13	2	n	1.4e-08	++++++++++++++
chr2:121448996-121449522	1	cgtcccgtccccgccccgcccctccccCGCGTTCCTTCGGGGCGACTTTGTCAGTCAGTACCCTAAACTGTCCCA	46	3	n	6.8e-05	+++++++++
chr2:121448996-121449522	76	CATGAGGTCACTTTGCCTAGTCACGTGCCCGGCCCCGTCGGAGCGCCACATCGCCAGCCGCACCCCTCCACCCCC CGGCCACGTGACCCGGCCTAGTTTCTACAGGCTGGGACCCAGCGCTCCGGGGAAGCCCCGCCCCGTGCCAGCGCT CCGCCCGCCGAGCTCCGCTCTTCGCCCTCCGGGACTGGCGCGTGGCACCGCACTCCACGTGTTTCCCCCTGCCCA	140	2	n	9.9e-05	+ ++ ++++++
chr2:121448996-121449522	76	CATGAGGTCACTTTGCCTAGTCACGTGCCCGGCCCCGTCGGAGCGCCACATCGCCAGCCGCACCCCTCCACCCCC CGGCCACGTGACCCGGCCTAGTTTCTACAGGCTGGGACCCAGCGCTCCGGGGAAGCCCCGCCCCGTGCCAGCGCT CCGCCCGCCGAGCTCCGCTCTTCGCCCTCCGGGACTGGCGCGTGGCACCGCACTCCACGTGTTTCCCCCTGCCCA	205	2	n	1.4e-06	++++++++++ + +
chr2:121448996-121449522	76	CATGAGGTCACTTTGCCTAGTCACGTGCCCGGCCCCGTCGGAGCGCCACATCGCCAGCCGCACCCCTCCACCCCC CGGCCACGTGACCCGGCCTAGTTTCTACAGGCTGGGACCCAGCGCTCCGGGGAAGCCCCGCCCCGTGCCAGCGCT CCGCCCGCCGAGCTCCGCTCTTCGCCCTCCGGGACTGGCGCGTGGCACCGCACTCCACGTGTTTCCCCCTGCCCA	223	2	n	7.9e-05	++ ++++++ ++
chr2:121448996-121449522	301	ATGAAAGCGGGCGCCCGGGCGTGAAGGGGCGGGAGGAAGAAGACGACTTGGTGGCGTCGCGCGAAGGGGGCGGGG CCTGCAACGTCGGCCCGAACGAGGGGGACGCAACGGAGGCAGGTTGGAGCCGCTGCCGTCGCCATGACCCGTGAG	322	2	y	2.4e-05	++++++++++++
chr2:121448996-121449522	301	ATGAAAGCGGGCGCCCGGGCGTGAAGGGGCGGGAGGAAGAAGACGACTTGGTGGCGTCGCGCGAAGGGGGCGGGG CCTGCAACGTCGGCCCGAACGAGGGGGACGCAACGGAGGCAGGTTGGAGCCGCTGCCGTCGCCATGACCCGTGAG	363	2	y	3.2e-09	+ ++++++++++++
chr7:137410436-137411239	1	ATAGCTCCTCATCTTTGCGCAAGCGCAGCGGGAGGGGCGGGACTGTCCTCTGCCTAGCTCCACCCAGGCCCCGCC CCTGGCCCCGCCTCGGCAGCAGGCTTACGACGTCCAGCCCGCCGGTCATCCGGAAGGACCTcgccccgggcgccc	30	2	y	9.9e-08	++++++++++++++
chr7:137410436-137411239	1	ATAGCTCCTCATCTTTGCGCAAGCGCAGCGGGAGGGGCGGGACTGTCCTCTGCCTAGCTCCACCCAGGCCCCGCC CCTGGCCCCGCCTCGGCAGCAGGCTTACGACGTCCAGCCCGCCGGTCATCCGGAAGGACCTcgccccgggcgccc	68	2	n	4.8e-07	+++++++++++ +
chr7:137410436-137411239	301	CTCGGAGGCGGGAACCACTCGACCACGTGTCTGGAGAAGCCAATGAGGAGGCGTGGGGCGTAGCCTAGACTCCAC	301	2	y	2.6e-05	++++++++++
chr7:137410436-137411239	301	CTCGGAGGCGGGAACCACTCGACCACGTGTCTGGAGAAGCCAATGAGGAGGCGTGGGGCGTAGCCTAGACTCCAC	337	1	n	3e-05	+++++++ ++ ++
chr7:137410436-137411239	526	AGTCCCAAAGGGCGTTTGTTTAGGATTTGCCACCCTTCGGCAACCCTTGGTCCGCGGGAGGCACGCCCTCCTCTC	585	2	n	8.8e-05	+ + +++++ ++ +
chr7:137410436-137411239	601	CTTCCTTGTGATTGGTTACTGAGTCCTGATAAGTAGATCCACGGACCAATCGGCACGCCTGAGGCTGCGCTGGGC	605	1	y	2.1e-07	+++ ++++++++++
chr7:137410436-137411239	601	CTTCCTTGTGATTGGTTACTGAGTCCTGATAAGTAGATCCACGGACCAATCGGCACGCCTGAGGCTGCGCTGGGC	643	1	n	2.8e-05	++++++++++ +
chr4:120666385-120666672	1	CAAAGTGCCTGCATCCTGGGACGCCCTTGCAGGCCCAAAGGGCGGAGCTCTGGTAGGGGGCGGGACCAATACCTT	35	2	y	3.8e-06	++ ++++++ ++
chr4:120666385-120666672	1	CAAAGTGCCTGCATCCTGGGACGCCCTTGCAGGCCCAAAGGGCGGAGCTCTGGTAGGGGGCGGGACCAATACCTT	53	2	y	1.3e-07	+ ++++++++++++
chr4:120666385-120666672	76	CTTGGACAGGTTCACGACCCGCCCAGAAGGGATTCATCCAGCCAATGACAGAGAGTGGGCGTGGCGTTCCCGCCT CTTGGTATAAAAAATCTCCGGACTTCAAGGCACTGCGCGAAAGCCTGGGAACCCTTGGGCTGTCTGTTTCTTTTG	91	2	n	9.9e-05	+ ++++++++
chr4:120666385-120666672	76	CTTGGACAGGTTCACGACCCGCCCAGAAGGGATTCATCCAGCCAATGACAGAGAGTGGGCGTGGCGTTCCCGCCT CTTGGTATAAAAAATCTCCGGACTTCAAGGCACTGCGCGAAAGCCTGGGAACCCTTGGGCTGTCTGTTTCTTTTG	114	1	n	3.7e-06	++++++++ + ++
chr4:120666385-120666672	76	CTTGGACAGGTTCACGACCCGCCCAGAAGGGATTCATCCAGCCAATGACAGAGAGTGGGCGTGGCGTTCCCGCCT CTTGGTATAAAAAATCTCCGGACTTCAAGGCACTGCGCGAAAGCCTGGGAACCCTTGGGCTGTCTGTTTCTTTTG	142	2	n	1.2e-05	+++++++++++
chr12:36042451-36042770	1	TGCAGTGCCGCGCCCGCAGCGGCTCCCACCCGCTCTGCAACCTGCGGCCGCAGCGGATCCGCCGATcgcgcgccc cgccccgccgccTCGTCTCGCCCTGCACTCTGATTGGCCACTGCTAGGGAACAAAGGTAGAGATATGCAAATCAA	72	2	n	2e-06	++++++++++ ++
chr12:36042451-36042770	1	TGCAGTGCCGCGCCCGCAGCGGCTCCCACCCGCTCTGCAACCTGCGGCCGCAGCGGATCCGCCGATcgcgcgccc cgccccgccgccTCGTCTCGCCCTGCACTCTGATTGGCCACTGCTAGGGAACAAAGGTAGAGATATGCAAATCAA	102	1	y	2.4e-06	+++++++++++++
chr12:36042451-36042770	151	TGCGCTCTGGGGTCCGGGAGAGGCGGGGCAGCTCAGCggaggagaaggaggaggaggaggagggggCCCCGAGAC	166	2	y	1.5e-07	++++++++++++++
chr12:36042451-36042770	226	TGTCTGGAGGGAGCCGGCCTCTGGCTCACGAGACTGTGGCCTCTGTATAATTTCCCCCCTCCCAGGTGAACAGCA GAGGGCGGGGCTCCACGCT	298	2	y	6.4e-08	+ ++ +++++++++
chr17:71551881-71552261	1	TACAGAGAGCTGGAGCGGAATAACGGCAGAAGGCGGAGGCGACCCGGTCAGCGAGGGGCGGGGCGGGGCGATAGC	26	2	y	3.5e-05	+ ++ ++++++ +
chr17:71551881-71552261	1	TACAGAGAGCTGGAGCGGAATAACGGCAGAAGGCGGAGGCGACCCGGTCAGCGAGGGGCGGGGCGGGGCGATAGC	51	2	y	8e-08	+ ++++++++++++
chr17:71551881-71552261	76	GCAGGCCCCGCCCTCGGCGGTTCCCGTGCTCTGATTGGCTCCCGCGGCCGCGCGCTCCCGGCCCTCCGCTTGAGG	80	2	n	6.6e-07	+++++++++ + +
chr17:71551881-71552261	76	GCAGGCCCCGCCCTCGGCGGTTCCCGTGCTCTGATTGGCTCCCGCGGCCGCGCGCTCCCGGCCCTCCGCTTGAGG	103	1	y	9.3e-07	++++++++++++
chr17:71551881-71552261	226	CTGTGGGGCCGCTCGCTCTTCGCCGGCCTGCGCAGGTACCTTCACCTgcccgcccgcccgccggggccTGATGGC	272	2	n	8.4e-05	+++++++ +++
chr17:71551881-71552261	301	GGGGTTCTGGGTGTCGCCTGTGCCCTCCCTCTCGCTCCCACAGTCCTGCGTGAGGAGGCGGGGACGCCTCAGCCC	351	2	y	7.2e-06	++++++++++++
chr11:101278899-101279181	1	GAGGGTCACCAGCTCCAGGGGCCGCCATGTTGCTGCTCCGCCCTAAGCCGTCAAGCCCGGAACTCGCCAGGAATT	35	2	n	1.8e-05	++ ++++++ +
chr11:101278899-101279181	151	CCGCCCTAGAGGAGGGACAGGAAAGGTGAAAAGCGCCCTGCTTTCTGATTGGCTGAGCTCTCTGTGTCAGTTGGG	192	1	y	6.2e-08	+++++++++++++
chr19:46152242-46152686	1	TAAACAGCGCACTGCAACCGAACCCTATCTGACCCCACCTCTTCAACCGCCCAGCACAATTTTTCATTGTTTATT GGCTTCTGTAACTGTCAGTCAGAGAATCCTCGTATCCGTTGGCTGTCCCCTACCTACTCTTCTTTCCCTTGTAAT	32	2	n	7.1e-05	++++ +++++++
chr19:46152242-46152686	1	TAAACAGCGCACTGCAACCGAACCCTATCTGACCCCACCTCTTCAACCGCCCAGCACAATTTTTCATTGTTTATT GGCTTCTGTAACTGTCAGTCAGAGAATCCTCGTATCCGTTGGCTGTCCCCTACCTACTCTTCTTTCCCTTGTAAT	67	1	y	2.1e-05	+ + +++++++
chr19:46152242-46152686	1	TAAACAGCGCACTGCAACCGAACCCTATCTGACCCCACCTCTTCAACCGCCCAGCACAATTTTTCATTGTTTATT GGCTTCTGTAACTGTCAGTCAGAGAATCCTCGTATCCGTTGGCTGTCCCCTACCTACTCTTCTTTCCCTTGTAAT	85	3	n	4.5e-06	+ ++++++++++
chr19:46152242-46152686	151	CTGGTCTCTTTGGGCATTGCACGCCTCCCAGAGCTAATTTCTTTCTTCGATTGGATAGTCGGAATGCCACTTTTC	194	1	y	1.4e-05	++ +++++++ ++
chr19:46152242-46152686	226	AGAGTGCCACGCTCTGATTGGCTGAGCGCGGCAGGACTCTCGCAGTTACCAGGCAGCGGGCTAGACTGAGGCTAG	236	1	y	1.2e-07	+++++++++++++
chr3:32708351-32708854	1	TGCACCAAGCCCCTCCCACTCGCCCGCCCACCTAAGACTCCTCCTACTCTATTCGCGCGCGAAGCACAGCTCCAC CCACTCCCCCCGCCTTGCTCCTGGAAGCTCGGTCCACCCTACCGGCCGCTCGCGAAGCTCCACCCACCTCACCCG	9	2	n	3.1e-05	+++++ +++++++
chr3:32708351-32708854	1	TGCACCAAGCCCCTCCCACTCGCCCGCCCACCTAAGACTCCTCCTACTCTATTCGCGCGCGAAGCACAGCTCCAC CCACTCCCCCCGCCTTGCTCCTGGAAGCTCGGTCCACCCTACCGGCCGCTCGCGAAGCTCCACCCACCTCACCCG	69	2	n	7.2e-06	++ ++ ++++++++
chr3:32708351-32708854	1	TGCACCAAGCCCCTCCCACTCGCCCGCCCACCTAAGACTCCTCCTACTCTATTCGCGCGCGAAGCACAGCTCCAC CCACTCCCCCCGCCTTGCTCCTGGAAGCTCGGTCCACCCTACCGGCCGCTCGCGAAGCTCCACCCACCTCACCCG	132	2	n	1.4e-05	++ ++ ++++++ +
chr3:32708351-32708854	151	CCCGCGAAGctccgccccctcctgcccgtaccccaacaccttcccttcttctgtcgcttctccctctccctgccc	159	2	n	8e-08	++ +++++++++++
chr3:32708351-32708854	226	ctACGGATGCCTTCCATTGGCTAAGACGGCTAAACCGCGCGGGGATGCAGCAGCGCCACACTCTGATTGGCTAAT	235	1	y	5.6e-06	+++ + ++++++++
chr3:32708351-32708854	226	ctACGGATGCCTTCCATTGGCTAAGACGGCTAAACCGCGCGGGGATGCAGCAGCGCCACACTCTGATTGGCTAAT	285	1	y	3.7e-07	+++++++++++++
chr3:32708351-32708854	301	GACTAAGCCGGACCCTTTGTCATTGGTTGATACGAGAAACCAGCAAGAGTGGCTGTGCAGCGGGCGTGCGGCCGC	316	1	y	2.4e-06	++ + ++++++++
chr5:32863581-32863873	1	cccccccgccccgccccccccACCTCCCCGCAGCCCCGGAGGAGGAAGTGGCGCGGCCACCGAGACGAGGCGGAG	8	2	n	1.9e-09	++++++++++++++
chr5:32863581-32863873	76	GCTGGGCTAGAGCGGCCAAGCCGGCTGAGCAGGGACTGGCGAGGGGCGGGGACTCGGGGCGGAGCCTCGGGAGCG	114	2	y	1.4e-06	+ +++++++++++
chr5:32863581-32863873	151	GCGCGGGCTCAGGTGAGCGCTCTTCGGTGGTGCTGTCTGTCTGGTTCCTAGAGCCCTGGTGCGGAAGCTGCGCGA	181	3	n	4.5e-05	++++++ +++ +
chr3:104511650-104512228	226	ACCCTGACAGACACCGCTCGTCCGCCCCGCCCCGCGACGCAACGTACTCACGCTCAGCAGCCAGCCAATCGGAGC	249	2	n	1.5e-05	++++++++++ +
chr3:104511650-104512228	226	ACCCTGACAGACACCGCTCGTCCGCCCCGCCCCGCGACGCAACGTACTCACGCTCAGCAGCCAGCCAATCGGAGC	287	1	n	1.1e-06	+++++++++++++
chr3:104511650-104512228	301	CCCGGGATGAGGTTGCGTCGGAAATTGGGTTCTGAGAGAGGCGAGGCCTACGATTGCCCCGCCCCCTAGGAGGCG	334	2	y	3.5e-05	+ ++++++++ +++
chr3:104511650-104512228	301	CCCGGGATGAGGTTGCGTCGGAAATTGGGTTCTGAGAGAGGCGAGGCCTACGATTGCCCCGCCCCCTAGGAGGCG	356	2	n	9.9e-08	++++++++++++
chr2:62664155-62664562	1	GGCTTCTGGTAAGAACTCGAAAGAACCAGTAAGAGAGATGGACTGGAATCCAGGAGACAGGCTGCAGCCAATCAC AGGTGAGATGGGCGGGGCTTGCTCTGGCAGGGGTGGGCCTGTGGTCGGGGGCGGGACTCCAGGCAGAGCCGGCTC	65	1	n	6.6e-07	++++++++++ +++
chr2:62664155-62664562	1	GGCTTCTGGTAAGAACTCGAAAGAACCAGTAAGAGAGATGGACTGGAATCCAGGAGACAGGCTGCAGCCAATCAC AGGTGAGATGGGCGGGGCTTGCTCTGGCAGGGGTGGGCCTGTGGTCGGGGGCGGGACTCCAGGCAGAGCCGGCTC	80	2	y	1.9e-07	+ ++++++++++++
chr2:62664155-62664562	1	GGCTTCTGGTAAGAACTCGAAAGAACCAGTAAGAGAGATGGACTGGAATCCAGGAGACAGGCTGCAGCCAATCAC AGGTGAGATGGGCGGGGCTTGCTCTGGCAGGGGTGGGCCTGTGGTCGGGGGCGGGACTCCAGGCAGAGCCGGCTC	101	2	y	2.6e-05	++ +++++ +++ +
chr2:62664155-62664562	1	GGCTTCTGGTAAGAACTCGAAAGAACCAGTAAGAGAGATGGACTGGAATCCAGGAGACAGGCTGCAGCCAATCAC AGGTGAGATGGGCGGGGCTTGCTCTGGCAGGGGTGGGCCTGTGGTCGGGGGCGGGACTCCAGGCAGAGCCGGCTC	119	2	y	1e-06	+ +++++++++++
chr14:79587246-79587889	301	CGGGGCGCGGGACTCACGGCCACGCCCTCGGGGCGGGGGCTTGGCTGCGTCACGGGTAGGGGCGGGGCCGGAGAG	326	2	y	5.6e-05	+++++++++
chr14:79587246-79587889	301	CGGGGCGCGGGACTCACGGCCACGCCCTCGGGGCGGGGGCTTGGCTGCGTCACGGGTAGGGGCGGGGCCGGAGAG	355	2	y	4.9e-08	++ +++++++++++
chr14:79587246-79587889	376	CGTTTCCTCCTCTTTCCCAGCCGGCCCCGCGCCTACCTGCCCACCCTTCGCCTCCTTTTCCGCGGCTGCATGCTG	413	2	n	9.3e-05	+++ +++ ++ +
chr14:79587246-79587889	451	CGCGACCGCTGATTGGCTACGGAGGACGGAAGCTCAGTTGGGGTTTCTTTAGAAGTTTTCCCTTCCTGGGCGGCG	456	1	y	9.3e-07	++ +++++++++++
chr12:100724807-100725585	226	CCTCCGCCTCCTCCCCTCAGCGGGCACCGCTAGTACGGCACAACCCCGCGCCCTGCGCCTCCACCTCCTCCTCCA	226	2	n	1.3e-05	+ +++++++++++
chr12:100724807-100725585	226	CCTCCGCCTCCTCCCCTCAGCGGGCACCGCTAGTACGGCACAACCCCGCGCCCTGCGCCTCCACCTCCTCCTCCA	283	2	n	7.1e-05	+ ++ ++++++++
chr12:100724807-100725585	376	GCCAGCGCCCGTTCCCATTGGGCGGCTAGTCCTGACGTTTCAGGAGCCGCCCCGCCCCGCTGCTCGAATTGTTGT	424	2	n	3.4e-06	++++++++++ +
chr12:100724807-100725585	451	TGCTTGGCGGGGAGGCAGGAGAGGGAGGAGCGCGAACGCTCCGATTGGCAAGACCCACGGAATGCCCCACCTACT CGCTTTGGTGCGCACGCGCAGGCAGGCCTTCCCTCTCCTGACCTCCCCAGAATGGTCACACCCCTTATTCCCAGC	468	2	y	5.6e-05	++++ +++ ++ ++
chr12:100724807-100725585	451	TGCTTGGCGGGGAGGCAGGAGAGGGAGGAGCGCGAACGCTCCGATTGGCAAGACCCACGGAATGCCCCACCTACT CGCTTTGGTGCGCACGCGCAGGCAGGCCTTCCCTCTCCTGACCTCCCCAGAATGGTCACACCCCTTATTCCCAGC	488	1	y	2.8e-05	+++++++++++ +
chr12:100724807-100725585	451	TGCTTGGCGGGGAGGCAGGAGAGGGAGGAGCGCGAACGCTCCGATTGGCAAGACCCACGGAATGCCCCACCTACT CGCTTTGGTGCGCACGCGCAGGCAGGCCTTCCCTCTCCTGACCTCCCCAGAATGGTCACACCCCTTATTCCCAGC	514	2	n	7.9e-06	+++++ +++++++
chr12:100724807-100725585	601	TTCGATCTGTTAGTAAACAGTATCTAGTAGTCAGGAGGCGCTCCGGACCTCTGATTGGCTACTGCGGAAAGAGGC GGGGAAAGACGATTGGACCGCTTGGTCCGCCAATCACAGTGGACAAAGGAGGGTCCTGGAGGGAAGCACTTGTCA	648	1	y	6.2e-08	++++++++++++++
chr12:100724807-100725585	601	TTCGATCTGTTAGTAAACAGTATCTAGTAGTCAGGAGGCGCTCCGGACCTCTGATTGGCTACTGCGGAAAGAGGC GGGGAAAGACGATTGGACCGCTTGGTCCGCCAATCACAGTGGACAAAGGAGGGTCCTGGAGGGAAGCACTTGTCA	667	2	y	2.3e-06	+ +++++++++++
chr12:100724807-100725585	601	TTCGATCTGTTAGTAAACAGTATCTAGTAGTCAGGAGGCGCTCCGGACCTCTGATTGGCTACTGCGGAAAGAGGC GGGGAAAGACGATTGGACCGCTTGGTCCGCCAATCACAGTGGACAAAGGAGGGTCCTGGAGGGAAGCACTTGTCA	700	3	n	5.1e-05	+ + + +++++++
chrX:52912104-52912466	1	AGGTCCGCGCGCGAGCAGGAGGCGGGGCACCCCGAACCTTTCGAGGGGCCGGTCTGCGCGCGTGCGCCGTCCTTC	15	2	y	9.9e-08	+ ++++++++++++
chrX:52912104-52912466	76	GGCGGCTTCAACCGCCCCGGCTCGGTGGCCAATCAGAGTGCCCGGCGCGCTCGAGACGTCTCAACGTCCTGTGGG	101	1	n	2.4e-06	+++++++++++++
chrX:52912104-52912466	226	CTGGCGACAGAGCCCCGCTCTTCGGCAGTGCCGGAGAACCGACTCCCGCCTTCCCCGTCTTCCCTCGTGGGCGCT	268	2	n	1.6e-05	++++++++ ++++
chr8:113634949-113635777	226	CAGTCCCACCAGCAGAGCCCGCCTCTTGCTTCAGCATCCGAGTCCCATAGGCTGACTGGGCTGCGGGCGACGTTC CGATTGGAAAGAGAGCTGTCCGTCAAGCATACGCTCCGCCCTGCCCCTATAATTGAATAAAAGAGCGTGAAGTTG	241	2	n	1.9e-05	++++++++++ +
chr8:113634949-113635777	226	CAGTCCCACCAGCAGAGCCCGCCTCTTGCTTCAGCATCCGAGTCCCATAGGCTGACTGGGCTGCGGGCGACGTTC CGATTGGAAAGAGAGCTGTCCGTCAAGCATACGCTCCGCCCTGCCCCTATAATTGAATAAAAGAGCGTGAAGTTG	297	1	y	6.6e-05	++++++++++ +
chr8:113634949-113635777	226	CAGTCCCACCAGCAGAGCCCGCCTCTTGCTTCAGCATCCGAGTCCCATAGGCTGACTGGGCTGCGGGCGACGTTC CGATTGGAAAGAGAGCTGTCCGTCAAGCATACGCTCCGCCCTGCCCCTATAATTGAATAAAAGAGCGTGAAGTTG	314	3	n	1.5e-06	+++++++ ++++++
chr8:113634949-113635777	226	CAGTCCCACCAGCAGAGCCCGCCTCTTGCTTCAGCATCCGAGTCCCATAGGCTGACTGGGCTGCGGGCGACGTTC CGATTGGAAAGAGAGCTGTCCGTCAAGCATACGCTCCGCCCTGCCCCTATAATTGAATAAAAGAGCGTGAAGTTG	333	2	n	1.1e-05	++ ++++++ +++
chr8:113634949-113635777	376	TCTCAATACTGGGGACGCGAGTTCATTGGTTCGGCATTCTCTCATTCCAGCAAAGACCGGAACAGGAGTGAGGTT	394	1	y	6.6e-05	+ +++++++
chr8:113634949-113635777	451	TCGGTTAGAAACAGGGAGATGTCAGTCAAGGGATGAGCAGTGGCTTTCGCCAATTAGCGCACACTATCTGCGGAG	467	3	n	2.2e-06	++ +++++++++++
chr8:113634949-113635777	526	GCTCCACCAGAATGGGGCGGGACATAAGGGAGAGCCTACTCTTGATTGGGTGAGAGGGACTAGGTCCCGCCCCCT CGACCTAGTAGATTTCCAGGCCGCGCCCCCTTCAGCCGGTAGCCCTTGGTACGCGAAGTGGGCCGGTCTGGCCCC	535	2	y	1.6e-06	+ + ++++++++++
chr8:113634949-113635777	526	GCTCCACCAGAATGGGGCGGGACATAAGGGAGAGCCTACTCTTGATTGGGTGAGAGGGACTAGGTCCCGCCCCCT CGACCTAGTAGATTTCCAGGCCGCGCCCCCTTCAGCCGGTAGCCCTTGGTACGCGAAGTGGGCCGGTCTGGCCCC	589	2	n	6.4e-08	+++++++++++++
chrX:7841146-7841984	1	AGAGGTGAACGTGAGGGTAAGAGGGCGGAGGTGACAGAGAAGGCGTGTTTTTCCGCCAAACACTATCAGTACGGT	18	2	y	5.9e-05	++ ++++++ +
chrX:7841146-7841984	76	GCACGTCTGTCTATCGGTTGGCCCATCTGAAGTGATGGACAGCTTCGTGGAACTAATCACCGCAAGATTACGACT	106	3	y	3.1e-06	+++++ +++++++
chrX:7841146-7841984	151	GTTGCCAGGGTGAAGTAGGACCCACCCTCTTGGGTTGGCGGATGGGAGGAACAGGAAGTGACGCCAGAGGGGACG	169	2	n	5.2e-05	+ +++ +++ ++
chrX:7841146-7841984	526	GCAGTCGTCCCGGCGGGCGAGCCTTTTGCCCACGTACTTCCGTGCAGGGGGCGGGGCTGCGTCCTGTTGTGCATG	569	2	y	7.9e-09	+ ++++++++++++
chrX:7841146-7841984	601	CGCACAACCAGGAAGCCCCACCCGGTAGTTGAGGAACCTGCGGAGGGGCGGGGCGAAGCGGTGCTTGTTTTGGTT	641	2	y	8e-08	+++++++++++++
chr14:31830651-31831064	76	GAGAGGCCAGAGTAAGCCGAGCGCCCATTGGCCACGCCACCGCGCTCGCTCGCTCCCGGGCTCCGCCTCTCCGCG	96	1	y	3.3e-05	+ ++ ++++++++
chr14:31830651-31831064	76	GAGAGGCCAGAGTAAGCCGAGCGCCCATTGGCCACGCCACCGCGCTCGCTCGCTCCCGGGCTCCGCCTCTCCGCG	135	2	n	3.4e-06	++ ++++++++++
chr14:31830651-31831064	151	GAGGGAGGGGCGGGGCACAGGAAgcggcggcgcgcggagcgggcgggccaggtggcggggcgtctgggcgcgcgc	153	2	y	1.4e-08	++++++++++++++
chr14:31830651-31831064	151	GAGGGAGGGGCGGGGCACAGGAAgcggcggcgcgcggagcgggcgggccaggtggcggggcgtctgggcgcgcgc	186	2	y	1.5e-05	++++ +++++++ +
chr14:31830651-31831064	226	cccgggcgcggTGGGCGGAGCCCGGACTGGAGGTGGGGAGGGACGGAAACTGGGTACCGGGTAACGGCCCGGGAT	233	2	y	1.2e-06	+ +++++++++ ++
chr14:31830651-31831064	226	cccgggcgcggTGGGCGGAGCCCGGACTGGAGGTGGGGAGGGACGGAAACTGGGTACCGGGTAACGGCCCGGGAT	251	2	y	5.9e-05	+++++ ++++
chr15:58594963-58595302	76	GAAAGAAAGATAAGGCTCACCCCACATgccccgccccgccccgccccTTCCCTCTGCCACTCCCAATGCACAGTC	113	2	n	4.5e-09	++++++++++++++
chr15:58594963-58595302	151	TTGCAGACTCAGAAGCCAATCTGGGTCAAGAAGGACAGGCAGGAGAGGTCTATTGGTTTCCTCGAGCCACTGTGC	177	3	y	7.7e-05	+ ++ +++++++
chr17:64600605-64600947	1	AGGGCCCAGTGAGGCAGGCGCTGGGCGGGCCTGGCGGGCGGCGCGCTGTGATTGGGCGCCAGGGGGCCCGCCCCC TCATCCCGGCGCGTCGGGAGGGGGCGGGGCCAGCCGGCTGCCCAGCTCCAGGGCTGCGGGCGCCTATTGACCCAA	18	2	y	2.3e-05	+ + ++++++++ +
chr17:64600605-64600947	1	AGGGCCCAGTGAGGCAGGCGCTGGGCGGGCCTGGCGGGCGGCGCGCTGTGATTGGGCGCCAGGGGGCCCGCCCCC TCATCCCGGCGCGTCGGGAGGGGGCGGGGCCAGCCGGCTGCCCAGCTCCAGGGCTGCGGGCGCCTATTGACCCAA	45	1	y	8e-05	++ +++++++ ++
chr17:64600605-64600947	1	AGGGCCCAGTGAGGCAGGCGCTGGGCGGGCCTGGCGGGCGGCGCGCTGTGATTGGGCGCCAGGGGGCCCGCCCCC TCATCCCGGCGCGTCGGGAGGGGGCGGGGCCAGCCGGCTGCCCAGCTCCAGGGCTGCGGGCGCCTATTGACCCAA	65	2	n	3.4e-06	+ +++++++++++
chr17:64600605-64600947	1	AGGGCCCAGTGAGGCAGGCGCTGGGCGGGCCTGGCGGGCGGCGCGCTGTGATTGGGCGCCAGGGGGCCCGCCCCC TCATCCCGGCGCGTCGGGAGGGGGCGGGGCCAGCCGGCTGCCCAGCTCCAGGGCTGCGGGCGCCTATTGACCCAA	92	2	y	1.1e-09	++++++++++++++
chr17:64600605-64600947	226	GGCGCTGGGGAACCGGCTCTTCCTTTCGCGGCTGCCGCCGCCATCTCCGCGTTCTCGGGGCGGGAAGGAGGGGGT	278	2	y	9.3e-05	+++++++++
chr4:70534909-70535305	1	ACCATCGCCACCTCCCTCTGACAggcggccggccccgcgggcgggccTCAACGCGGAGGGAGCGACTGGGCGGAG CGCGCACTGCCCGCCCTCCTCGATAGGCAGCGAAGCCTGGCCAATCGGAAGCCGCGTTGGCCCACGTGATCCGCC CGCTCCCCGGCCTCTTTGTAACGGCGCAGACCAATCAGAGGACTCCAAGGGAAGAGGGCGGGACGTCGGGAGGCG	34	2	y	7.9e-05	+ +++++++ +
chr4:70534909-70535305	1	ACCATCGCCACCTCCCTCTGACAggcggccggccccgcgggcgggccTCAACGCGGAGGGAGCGACTGGGCGGAG CGCGCACTGCCCGCCCTCCTCGATAGGCAGCGAAGCCTGGCCAATCGGAAGCCGCGTTGGCCCACGTGATCCGCC CGCTCCCCGGCCTCTTTGTAACGGCGCAGACCAATCAGAGGACTCCAAGGGAAGAGGGCGGGACGTCGGGAGGCG	63	2	y	1.3e-05	++ +++++++ ++
chr4:70534909-70535305	1	ACCATCGCCACCTCCCTCTGACAggcggccggccccgcgggcgggccTCAACGCGGAGGGAGCGACTGGGCGGAG CGCGCACTGCCCGCCCTCCTCGATAGGCAGCGAAGCCTGGCCAATCGGAAGCCGCGTTGGCCCACGTGATCCGCC CGCTCCCCGGCCTCTTTGTAACGGCGCAGACCAATCAGAGGACTCCAAGGGAAGAGGGCGGGACGTCGGGAGGCG	83	2	n	1.1e-05	+++++++ ++ +
chr4:70534909-70535305	1	ACCATCGCCACCTCCCTCTGACAggcggccggccccgcgggcgggccTCAACGCGGAGGGAGCGACTGGGCGGAG CGCGCACTGCCCGCCCTCCTCGATAGGCAGCGAAGCCTGGCCAATCGGAAGCCGCGTTGGCCCACGTGATCCGCC CGCTCCCCGGCCTCTTTGTAACGGCGCAGACCAATCAGAGGACTCCAAGGGAAGAGGGCGGGACGTCGGGAGGCG	113	1	n	1.9e-06	++++++++++++++
chr4:70534909-70535305	1	ACCATCGCCACCTCCCTCTGACAggcggccggccccgcgggcgggccTCAACGCGGAGGGAGCGACTGGGCGGAG CGCGCACTGCCCGCCCTCCTCGATAGGCAGCGAAGCCTGGCCAATCGGAAGCCGCGTTGGCCCACGTGATCCGCC CGCTCCCCGGCCTCTTTGTAACGGCGCAGACCAATCAGAGGACTCCAAGGGAAGAGGGCGGGACGTCGGGAGGCG	143	2	n	7.9e-05	+ ++++++ ++++
chr4:70534909-70535305	1	ACCATCGCCACCTCCCTCTGACAggcggccggccccgcgggcgggccTCAACGCGGAGGGAGCGACTGGGCGGAG CGCGCACTGCCCGCCCTCCTCGATAGGCAGCGAAGCCTGGCCAATCGGAAGCCGCGTTGGCCCACGTGATCCGCC CGCTCCCCGGCCTCTTTGTAACGGCGCAGACCAATCAGAGGACTCCAAGGGAAGAGGGCGGGACGTCGGGAGGCG	178	1	n	3.7e-06	+++++++++++++
chr4:70534909-70535305	1	ACCATCGCCACCTCCCTCTGACAggcggccggccccgcgggcgggccTCAACGCGGAGGGAGCGACTGGGCGGAG CGCGCACTGCCCGCCCTCCTCGATAGGCAGCGAAGCCTGGCCAATCGGAAGCCGCGTTGGCCCACGTGATCCGCC CGCTCCCCGGCCTCTTTGTAACGGCGCAGACCAATCAGAGGACTCCAAGGGAAGAGGGCGGGACGTCGGGAGGCG	201	2	y	1.9e-07	+ ++ +++++++++
chr15:76710521-76710790	1	AAAGTCCTGTCCTTAGCCAATGAGAGCGGCCGCCGGGCGGTGCTGCAGATGCTCTGAGCCCCCCGGGGAGGGGGC GGGCCTATGAGTTGTTGCGTCATCACAGCGCGCCCCGGCGCTGCGCGGAGCTGGGCGAGGCTTGCTGGGCGAGGA	14	1	n	7.6e-07	++++++++ ++++
chr15:76710521-76710790	1	AAAGTCCTGTCCTTAGCCAATGAGAGCGGCCGCCGGGCGGTGCTGCAGATGCTCTGAGCCCCCCGGGGAGGGGGC GGGCCTATGAGTTGTTGCGTCATCACAGCGCGCCCCGGCGCTGCGCGGAGCTGGGCGAGGCTTGCTGGGCGAGGA	67	2	y	1.9e-07	++++++++++++ +
chr15:76710521-76710790	1	AAAGTCCTGTCCTTAGCCAATGAGAGCGGCCGCCGGGCGGTGCTGCAGATGCTCTGAGCCCCCCGGGGAGGGGGC GGGCCTATGAGTTGTTGCGTCATCACAGCGCGCCCCGGCGCTGCGCGGAGCTGGGCGAGGCTTGCTGGGCGAGGA	123	2	y	9.3e-05	+ + ++++++ +++
chr4:136309932-136311146	1	tgcccgaaacacctcccactaccggccccacctcccagcactactacattggccatcaagttCGTATCAAGTGCA	25	2	n	1.4e-05	+++++ ++++++
chr4:136309932-136311146	151	ATCTCCAGATATGTTTGGAAGCAGATCCCTTGACCTTCTTCACTGAGGTAGTGTTGGGACAGGAGTGACAGGTGA	210	3	y	2.1e-05	+ ++ ++++++++
chr4:136309932-136311146	601	TAAGGGACTCCGGCGCGGGGTAGCAGCGCCATTGCGGAGCGTGGCCGCCGGGACCCGAGGGGGCGGGGCTCCGGA	656	2	y	7.9e-09	+++++++++++++
chr4:136309932-136311146	676	GGTGGCCACGCGGCGGGAGGCCTAGATTTTTCAACCTCTTAACGGTGGTAGAAGAAGAGGGAGGAGCTTCGGCCA	729	2	y	7.1e-05	+ ++ +++ ++ ++
chr4:136309932-136311146	751	CGCAAGGCCCGCTGCCCCGCAGCCTCGCCACTACCAGGGGCTCCCACCAACAGACCCCTTTGTGTGCATGCCCCC GCCCCGGAGGCGCCGCAGCCAGTGGCGCTGAGACCCCTCATTGGCTCAGCCCGACGGCCACACCGATTGGTCCTC	821	2	n	8.8e-05	+++++++++
chr4:136309932-136311146	751	CGCAAGGCCCGCTGCCCCGCAGCCTCGCCACTACCAGGGGCTCCCACCAACAGACCCCTTTGTGTGCATGCCCCC GCCCCGGAGGCGCCGCAGCCAGTGGCGCTGAGACCCCTCATTGGCTCAGCCCGACGGCCACACCGATTGGTCCTC	859	1	y	3.6e-05	++ ++ +++++++
chr4:136309932-136311146	751	CGCAAGGCCCGCTGCCCCGCAGCCTCGCCACTACCAGGGGCTCCCACCAACAGACCCCTTTGTGTGCATGCCCCC GCCCCGGAGGCGCCGCAGCCAGTGGCGCTGAGACCCCTCATTGGCTCAGCCCGACGGCCACACCGATTGGTCCTC	885	1	y	9.1e-05	+ ++++++++++
chr4:136309932-136311146	901	GGAGTCCCCGACGTGAGGGCCGCTTTCCCCTCTCTCTTATTGGCCCGTCAAGCTGCCCGTCATACGGTCTCGTGG	933	1	y	1.3e-05	++++ +++++++
chr4:136309932-136311146	901	GGAGTCCCCGACGTGAGGGCCGCTTTCCCCTCTCTCTTATTGGCCCGTCAAGCTGCCCGTCATACGGTCTCGTGG	951	3	n	4.2e-05	+++++ + ++++
chr4:136309932-136311146	1126	GGGCCAGGCCGCCAGCCCCCAGCTCTGCCCTGGTGAGTCTCGCGCTGGCCCGTGGGGGGGAGGGGCCGGGAGTCC	1178	2	y	5.9e-05	+++++++ +++++
chr9:118925433-118925645	1	TAGATTGTCTTCTCCAGCCCGTCTGTCAGTCACGAGCTTCAGCTCCGCCCACACAGCGGTAATTGGTGAGGAgcg	21	3	n	6.5e-07	+ ++++++++++++
chr9:118925433-118925645	1	TAGATTGTCTTCTCCAGCCCGTCTGTCAGTCACGAGCTTCAGCTCCGCCCACACAGCGGTAATTGGTGAGGAgcg	42	2	n	8.8e-06	++ ++++++++ +
chr9:118925433-118925645	76	cgcgcgagcgcccgcggcccgcccccTTCAGCACTGCCCCCGCCCACCGGTTGACAGGGCTGCAAGTGGGGCCTG	91	2	n	4e-07	+ ++++++++++ +
chr9:118925433-118925645	76	cgcgcgagcgcccgcggcccgcccccTTCAGCACTGCCCCCGCCCACCGGTTGACAGGGCTGCAAGTGGGGCCTG	112	2	n	1.1e-05	+++++++++++
chr15:81190739-81191143	1	AGCTGCGGGCCCTCCCACCACTCCGGGTCCCGCCTCCGCACCCTCCCCCCTACCCGCCTGGGAGCGACAGCCGTA	27	2	n	9.6e-06	+++++++++++ +
chr15:81190739-81191143	76	TCGACCAATCAGAAACCTAGCGCCGTTAGGGCTAGCCCGATTTAGGGGGCGTTCGCCGAAGGAAGAGGAACGAGG	77	1	n	6.6e-07	+++++++++++++
chr15:81190739-81191143	151	GAGGCTAGTACGGCGGCGCGACTTCTGTGACTGACATCATAGCGCAGCCAATCGGTAACTGAGAGATGACTTCAT	176	3	y	1e-05	++++++++++ +
chr15:81190739-81191143	151	GAGGCTAGTACGGCGGCGCGACTTCTGTGACTGACATCATAGCGCAGCCAATCGGTAACTGAGAGATGACTTCAT	195	1	n	1.2e-05	+++++++++++ +
chr15:81190739-81191143	226	CGCTGAAGGAAGTCTGGAACTGGCGGAGCGGCCGCCAAGAGGTGGGAGGAGGTCGGCGATGAGCCGGGGGGCGGA GTCTGGGTCTTAAAGAAACCGTAACACATCTGATCACCCTGTCAAAGGGTGACCGCGGAGCTAGCTACCTAGGGT	289	2	y	8.8e-06	+++++++++ +
chr7:44929483-44930105	1	CGCCCCGCCTCAGACCCGCCCCTACGGATTGTCATCCGGGAACGTACGCCACTTGTTAGCTGAGAGCCCTGCCGC	13	2	n	8.8e-06	+ +++++++++ +
chr7:44929483-44930105	76	TCACAATAGAACGCCCGCCCTCCTCTCTCTCTGATTGGCTAAATAGTAAAGACACCAGGTGATGATTGGTGCAGT	87	2	n	2.6e-05	+++++++ ++ +
chr7:44929483-44930105	76	TCACAATAGAACGCCCGCCCTCCTCTCTCTCTGATTGGCTAAATAGTAAAGACACCAGGTGATGATTGGTGCAGT	103	1	y	9.6e-08	+++++++++++++
chr7:44929483-44930105	226	GGGACCGCCCCCTGAACGGCCGAGACCAACGCTAATTGGATGGACTACCAGCTCCGCGCCAGTAGGGCGGGATGT	285	2	y	3.8e-05	+ ++++++++
chr7:44929483-44930105	301	AAGAGGCCGAAGGAGGCGGAACTTCGGGAAAAGAAGACCAATGGGTGAGGAGATTGCTCTTCGCAAGGCTCTGCC	309	2	y	2.3e-06	+ +++++++++ ++
chr7:44929483-44930105	376	GATTCGCCGGAAGCGTCATACTTCCGCCCTCGAAGGGGCGGTTGTGGGGGGCGGGCAAAAGGGCGACGATCCGTA	419	2	y	8.8e-06	+ ++++++++++
chr7:44929483-44930105	451	GAGAAGGAAGGAGAAAGAAGCCCTGTCAGTTAGCTGAACTGCGATAGGTGGAGCGATGCCTGCAATTCCCTGCTG	471	3	n	7.2e-05	+++++++++ +
chr7:44929483-44930105	451	GAGAAGGAAGGAGAAAGAAGCCCTGTCAGTTAGCTGAACTGCGATAGGTGGAGCGATGCCTGCAATTCCCTGCTG	491	2	y	4.6e-05	+ ++++++ ++ ++
chr7:44929483-44930105	526	CAGAGAGGGGCTGGGCGAGGCGGTAGACCGTGAGGTGTCCACTACGCAGGCGCCTCCCTCTTCCCAGTCGGTCTC	533	2	y	7.5e-05	+++ ++++++ +++
chr17:24141515-24141909	1	CTCAGCGTCCTCCTCCCCGCGGCGGAGCCCCAGCAATGGCCGCCCTCATCCTgcgcccgccccgccgcctgccgc	54	2	n	8.8e-05	++++++++ ++
chr17:24141515-24141909	76	ccccagcgccaccccgcccccgcgcgACGCTAAGCAGGACTTCCGCGACGTAGCCGCCGCTCCTCTCGCCCATTG GTCAGTATAGCTGTCATTGGCGGCGGGCCGTGAGGGCCCCGCCCCCGACCAAGAGCCGTATTTCCGGGTTGGGGC	86	2	n	2.6e-06	++++++++++ +
chr17:24141515-24141909	76	ccccagcgccaccccgcccccgcgcgACGCTAAGCAGGACTTCCGCGACGTAGCCGCCGCTCCTCTCGCCCATTG GTCAGTATAGCTGTCATTGGCGGCGGGCCGTGAGGGCCCCGCCCCCGACCAAGAGCCGTATTTCCGGGTTGGGGC	141	1	y	3.3e-05	+ ++ ++++++++
chr17:24141515-24141909	76	ccccagcgccaccccgcccccgcgcgACGCTAAGCAGGACTTCCGCGACGTAGCCGCCGCTCCTCTCGCCCATTG GTCAGTATAGCTGTCATTGGCGGCGGGCCGTGAGGGCCCCGCCCCCGACCAAGAGCCGTATTTCCGGGTTGGGGC	160	1	y	6.6e-05	++ + ++++++ +
chr17:24141515-24141909	76	ccccagcgccaccccgcccccgcgcgACGCTAAGCAGGACTTCCGCGACGTAGCCGCCGCTCCTCTCGCCCATTG GTCAGTATAGCTGTCATTGGCGGCGGGCCGTGAGGGCCCCGCCCCCGACCAAGAGCCGTATTTCCGGGTTGGGGC	186	2	n	3.4e-07	+++++++++++ +
chr17:24141515-24141909	226	CCGGCGCGCTTGTCGAGGGAGGCTGAGCGAGCCAATCAGAAGTGACGGGGAGGGGCCGGGGCCGGAGCGCCGAGC	254	1	n	2.7e-07	+++++++++++++
chr11:21371035-21371508	151	AGCCCCCACTTTCGCCACACACCTCCCCTCCCCCTCCTTCCCCCCTCCCAATGCGGAAATGTCCCTACTGCTCAG	174	2	n	4e-05	++++ ++++++++
chr11:21371035-21371508	226	AGCGACAGGCACAGCCGCCAGTCCGGAGCCGAAGTTTGCCTAAGGACCTGGCCAATGAGACACGCGGAGGTGGCA GGGGGCGGGGCGTTCGAGGCCCGAGGGAGGCGGGCGCAGAAGCGAAGGCGGGAATCCCACGCGTGGGAGCTGCAC	274	1	n	4.9e-05	++++++++ +++
chr11:21371035-21371508	226	AGCGACAGGCACAGCCGCCAGTCCGGAGCCGAAGTTTGCCTAAGGACCTGGCCAATGAGACACGCGGAGGTGGCA GGGGGCGGGGCGTTCGAGGCCCGAGGGAGGCGGGCGCAGAAGCGAAGGCGGGAATCCCACGCGTGGGAGCTGCAC	298	2	y	7.9e-09	+ ++++++++++++
chr11:21371035-21371508	226	AGCGACAGGCACAGCCGCCAGTCCGGAGCCGAAGTTTGCCTAAGGACCTGGCCAATGAGACACGCGGAGGTGGCA GGGGGCGGGGCGTTCGAGGCCCGAGGGAGGCGGGCGCAGAAGCGAAGGCGGGAATCCCACGCGTGGGAGCTGCAC	323	2	y	3.1e-05	+ ++++++++++
chr11:21371035-21371508	226	AGCGACAGGCACAGCCGCCAGTCCGGAGCCGAAGTTTGCCTAAGGACCTGGCCAATGAGACACGCGGAGGTGGCA GGGGGCGGGGCGTTCGAGGCCCGAGGGAGGCGGGCGCAGAAGCGAAGGCGGGAATCCCACGCGTGGGAGCTGCAC	341	2	y	2.8e-05	+ + ++++++++
chr7:67222418-67222724	1	TGGGATAAATGACATAGGAGCACAAGTCCAGGGTCCACGCTGGAGCCCCGCCCATCAGGGCCCGCCCTCATTCTG	45	2	n	1.2e-06	++++++++++++
chr7:67222418-67222724	1	TGGGATAAATGACATAGGAGCACAAGTCCAGGGTCCACGCTGGAGCCCCGCCCATCAGGGCCCGCCCTCATTCTG	59	2	n	7.9e-06	+ +++++++ +
chr7:67222418-67222724	76	ACCTCTCAGCACCTCCCGGCTCTGCCAGGGCCCGCCCTCCTCTGAAGTCATTGGTTGGCTCTTAGTCCCCGCCCC CGGAAGACCTGCTTTTTGCAGCCAATCGGCGGGCGCGGTGGCGGTGAAGCCTGGGAGCGAGGTACCCGAACCTGG	104	2	n	1.8e-06	+ +++++++ ++ +
chr7:67222418-67222724	76	ACCTCTCAGCACCTCCCGGCTCTGCCAGGGCCCGCCCTCCTCTGAAGTCATTGGTTGGCTCTTAGTCCCCGCCCC CGGAAGACCTGCTTTTTGCAGCCAATCGGCGGGCGCGGTGGCGGTGAAGCCTGGGAGCGAGGTACCCGAACCTGG	119	1	y	8e-05	+ ++++++++
chr7:67222418-67222724	76	ACCTCTCAGCACCTCCCGGCTCTGCCAGGGCCCGCCCTCCTCTGAAGTCATTGGTTGGCTCTTAGTCCCCGCCCC CGGAAGACCTGCTTTTTGCAGCCAATCGGCGGGCGCGGTGGCGGTGAAGCCTGGGAGCGAGGTACCCGAACCTGG	141	2	n	1.6e-05	++++++++++
chr7:67222418-67222724	76	ACCTCTCAGCACCTCCCGGCTCTGCCAGGGCCCGCCCTCCTCTGAAGTCATTGGTTGGCTCTTAGTCCCCGCCCC CGGAAGACCTGCTTTTTGCAGCCAATCGGCGGGCGCGGTGGCGGTGAAGCCTGGGAGCGAGGTACCCGAACCTGG	169	1	n	4.8e-06	+++++++++++ ++
chr7:67222418-67222724	226	AGCAGGGTCTGCTGGGTTGACTTGGGGGGCCAGGGCTTCTGGCCCTGTCACTGTGGGCTCAGTGGAGGGCTGCCA ATCCAG	293	3	n	2.6e-05	+++++ +++++ ++
chr5:33629554-33630017	76	AAAACCGCAGCCGACGCCCCGCCCCCTCCGGACGCCCTCATTGGTCGCCGCGCCGCTACCACCGCCCCGAGCCGT	91	2	n	1.1e-09	++++++++++++++
chr5:33629554-33630017	76	AAAACCGCAGCCGACGCCCCGCCCCCTCCGGACGCCCTCATTGGTCGCCGCGCCGCTACCACCGCCCCGAGCCGT	109	1	y	4.6e-05	+ ++ ++++++++
chr5:33629554-33630017	226	ACGTCACTGCCCGGCGTGTTGTGGGTGTGGCCTCGTGACGCCCCGCCCCCGTTTCCTCTCACTTCCCTCCTACGG	265	2	n	6.6e-07	+++++++++++
chr5:33629554-33630017	301	GTACCGTGCGCCGCTGCTGGCCCCGCCCCCCTGTGCGAGCTGGCCCGCGCCGGGTGTGACGTTAACCTTCGGGTG	320	2	n	6.4e-08	++++++++++++
chr7:24399509-24400108	301	GGAGGACCTTCCCCGCCCACGCTGCACTCCCGTCACTCAGAGCGCGCGCTGCGACCCAGGAACTAATCAGCAGCT	310	2	n	6.5e-06	++++++++++ +
chr7:24399509-24400108	301	GGAGGACCTTCCCCGCCCACGCTGCACTCCCGTCACTCAGAGCGCGCGCTGCGACCCAGGAACTAATCAGCAGCT	328	3	n	2.1e-05	++ ++++ +++
chr7:24399509-24400108	376	GCCCTAGGTAAGGGGAAGGGGGGACGCCCCGAGCCTGGGAGAGGCAGGCGCGCCGACGGGGCGGGGTTGGGGGTG GGGCGTATTCAAGCCCCGCCCCCGCCCTGCCGTTAAAAGGTCGCTGGGCGGCTGGCCAATGGGAGTAGGAACGTG	441	2	y	4.7e-06	+ +++++ +++++
chr7:24399509-24400108	376	GCCCTAGGTAAGGGGAAGGGGGGACGCCCCGAGCCTGGGAGAGGCAGGCGCGCCGACGGGGCGGGGTTGGGGGTG GGGCGTATTCAAGCCCCGCCCCCGCCCTGCCGTTAAAAGGTCGCTGGGCGGCTGGCCAATGGGAGTAGGAACGTG	463	2	n	4.9e-08	+++++++++++ ++
chr7:24399509-24400108	376	GCCCTAGGTAAGGGGAAGGGGGGACGCCCCGAGCCTGGGAGAGGCAGGCGCGCCGACGGGGCGGGGTTGGGGGTG GGGCGTATTCAAGCCCCGCCCCCGCCCTGCCGTTAAAAGGTCGCTGGGCGGCTGGCCAATGGGAGTAGGAACGTG	503	1	n	1.9e-05	++++++++ ++++
chr9:21030840-21031086	1	TGGTATGGCTTTTTCTGATTGGCTCCGCTGATACAGGCCGGAGCTCTGATTGGAGGCTAAGTTTCCCTTCTCCTC	12	1	y	5.3e-07	++++++++++++
chr9:21030840-21031086	1	TGGTATGGCTTTTTCTGATTGGCTCCGCTGATACAGGCCGGAGCTCTGATTGGAGGCTAAGTTTCCCTTCTCCTC	43	1	y	5.7e-05	++++++++++ +
chr9:21030840-21031086	151	TATCATTAATTGGGGGGGGGGGGGGAGGTAGAAACACTCGAGTAGGCGGGGCCTTCTTCAAGTAGTAGAGGAAGC	189	2	y	3.4e-07	+++++++++++++
chr18:9449946-9450511	151	CAGCGTTGCACGACAACCGTGGCGTGCGGCTGGGGTTCGCGAgcccggccccacgcctggccgcgtcggccccgc cccctccccgcggccccgccccacgccggcTTGCAACATTTCCGCCTCTCTGCTAGGCCACGCCCTCTACACGCA	219	2	n	1.1e-09	++++++++++++++
chr18:9449946-9450511	151	CAGCGTTGCACGACAACCGTGGCGTGCGGCTGGGGTTCGCGAgcccggccccacgcctggccgcgtcggccccgc cccctccccgcggccccgccccacgccggcTTGCAACATTTCCGCCTCTCTGCTAGGCCACGCCCTCTACACGCA	238	2	n	1.2e-06	++++++++++ + +
chr18:9449946-9450511	151	CAGCGTTGCACGACAACCGTGGCGTGCGGCTGGGGTTCGCGAgcccggccccacgcctggccgcgtcggccccgc cccctccccgcggccccgccccacgccggcTTGCAACATTTCCGCCTCTCTGCTAGGCCACGCCCTCTACACGCA	264	2	n	3.8e-05	+ +++++++++
chr18:9449946-9450511	151	CAGCGTTGCACGACAACCGTGGCGTGCGGCTGGGGTTCGCGAgcccggccccacgcctggccgcgtcggccccgc cccctccccgcggccccgccccacgccggcTTGCAACATTTCCGCCTCTCTGCTAGGCCACGCCCTCTACACGCA	282	2	n	3.3e-05	+++ +++++ ++ +
chr18:9449946-9450511	526	AGCTCAGCTTCTGTCAGTCTCTACGGAGGACTTGGGAGTC	534	3	n	2.4e-05	+++++++++ +
chr8:129263541-129263762	1	TACTGGCCAATCAGAGCCTTTAGGCGGACCTGCCAGTCAGAAGAGAAGGCGGGTTTTCCGGGTGCCGTGGTGCCG	4	1	n	9.3e-07	+++++++++++++
chr8:129263541-129263762	1	TACTGGCCAATCAGAGCCTTTAGGCGGACCTGCCAGTCAGAAGAGAAGGCGGGTTTTCCGGGTGCCGTGGTGCCG	28	3	n	8.4e-06	+++++ ++++++
chr8:129263541-129263762	1	TACTGGCCAATCAGAGCCTTTAGGCGGACCTGCCAGTCAGAAGAGAAGGCGGGTTTTCCGGGTGCCGTGGTGCCG	42	2	y	5.6e-05	+++ +++++++
chr17:29716989-29717265	1	TTTCCGCGCTGGACCAGCCCATTAAGTCGCACTACGCACGCGCAGGACCTCGTGCTTCTTTTTCATTGGTCGGTG	59	1	y	5.6e-06	++ + ++++++++
chr17:29716989-29717265	76	CAGAGGAAGGAGGCGGGACTTCTGCGTCGCCATCTTGTTAAGGGGCGCGTCCATCCTGCAGCGGCCATGTTTGTG	81	2	y	2.8e-07	+ ++++++++++++
chr11:69098719-69099018	76	TGTGTGTGACACAGCCCTGACCTCAGTGGGGGCCAGTAGCCAATCAGATGCCAGGAAGAGATCCTTAGCCAACCG GGGGCGGGGCCTGCGGCTCTTCGGGCAGAAGGCCAATGAGGGGCAGGGCCTGGCATTATGCAACCCGCCTCCCAG	112	1	n	1.4e-06	++++++++++++ +
chr11:69098719-69099018	76	TGTGTGTGACACAGCCCTGACCTCAGTGGGGGCCAGTAGCCAATCAGATGCCAGGAAGAGATCCTTAGCCAACCG GGGGCGGGGCCTGCGGCTCTTCGGGCAGAAGGCCAATGAGGGGCAGGGCCTGGCATTATGCAACCCGCCTCCCAG	147	2	y	9e-07	+++++++++++
chr11:69098719-69099018	76	TGTGTGTGACACAGCCCTGACCTCAGTGGGGGCCAGTAGCCAATCAGATGCCAGGAAGAGATCCTTAGCCAACCG GGGGCGGGGCCTGCGGCTCTTCGGGCAGAAGGCCAATGAGGGGCAGGGCCTGGCATTATGCAACCCGCCTCCCAG	180	1	n	7.5e-05	+++++++ ++ ++
chr11:69098719-69099018	76	TGTGTGTGACACAGCCCTGACCTCAGTGGGGGCCAGTAGCCAATCAGATGCCAGGAAGAGATCCTTAGCCAACCG GGGGCGGGGCCTGCGGCTCTTCGGGCAGAAGGCCAATGAGGGGCAGGGCCTGGCATTATGCAACCCGCCTCCCAG	212	2	n	6.3e-05	++++++++++
chr5:109996408-109996660	1	CACCCTAACCCTAAAGGAGGTGCTCGAGTCACTCAAGACTTACTGGCCAATCAGAGCCTCTACGCGGACCTGCCA GTCAGAGGGGAAGGCGGGTTTTCCGGATACCTTGGGCCGGTTTCCCTTAGTAGCTGAGCAGGCTTGAATGGTCCC	44	1	n	9.3e-07	+++++++++++++
chr5:109996408-109996660	1	CACCCTAACCCTAAAGGAGGTGCTCGAGTCACTCAAGACTTACTGGCCAATCAGAGCCTCTACGCGGACCTGCCA GTCAGAGGGGAAGGCGGGTTTTCCGGATACCTTGGGCCGGTTTCCCTTAGTAGCTGAGCAGGCTTGAATGGTCCC	68	3	n	8.4e-06	+++++ ++++++
chr5:109996408-109996660	1	CACCCTAACCCTAAAGGAGGTGCTCGAGTCACTCAAGACTTACTGGCCAATCAGAGCCTCTACGCGGACCTGCCA GTCAGAGGGGAAGGCGGGTTTTCCGGATACCTTGGGCCGGTTTCCCTTAGTAGCTGAGCAGGCTTGAATGGTCCC	82	2	y	3.8e-05	++++ +++++++
chr16:4679694-4680017	1	TGCAGCCTGCCGCCTCAGCAGCCTGCAGCCTGGTGCCACGCCCTTATTGATGACAACCAATCGGAAGCTCCTGCG	35	2	n	8.8e-05	+++ +++++ +
chr16:4679694-4680017	1	TGCAGCCTGCCGCCTCAGCAGCCTGCAGCCTGGTGCCACGCCCTTATTGATGACAACCAATCGGAAGCTCCTGCG	54	1	n	3.7e-07	++++++++++++++
chr16:4679694-4680017	76	GCCTGCCTAGGCACGCCCCCACGTCACCCTTCTTCAGCGCGACGGCCTTCAGCCCCGCCTTCTTCAGAGGCCAGG	85	2	n	8.4e-05	+ + +++++++ +
chr16:4679694-4680017	76	GCCTGCCTAGGCACGCCCCCACGTCACCCTTCTTCAGCGCGACGGCCTTCAGCCCCGCCTTCTTCAGAGGCCAGG	127	2	n	2.8e-07	+++++++++ ++ +
chr6:146642359-146642794	1	AGGCTCGGTCCAGCGTAAACGCGAACCCGTAGCAGCTCAGCCTGCACGCGTCCCTCCTCCCCCACACCAGCCCTG	50	2	n	4.9e-05	+++++ ++++++++
chr6:146642359-146642794	76	GATCCCACCCGCCTGACGTCAGCAGGCCCGCAGGCTGGCCCCGCCCCTCCCCGGCAGCATGCTTCCTTAACCACG	113	2	n	1.4e-08	++++++++++++++
chr6:146642359-146642794	151	CCCCTCAAGGAGGAAGGCCTGTGATTGGTCCGGAGGCGTCATAAATTGGCCAATCGCTCGCGCTCTAGCAGCTTT	168	1	y	9.3e-06	+++ +++++++++
chr6:146642359-146642794	301	CTTTCCTCTGCTCGCCAGCCTTGCTTTCCTGACGCGGAGAGAGGAGGAAGGGGCGAGGCAAGGCCCCGGGGAGCG	346	2	y	9.6e-06	++++++++++ +++
chr11:98773801-98774232	1	TAGGCGGAGAAGGGCGGGGCGGGAGCCTGGCCCTCAGCTGGCCTCACGTCCCCACTCCACGTGTGCCCCTCGCAC	7	2	y	2.3e-07	+ ++ +++++++++
chr11:98773801-98774232	76	GTGGCACCCCAACGAGGAACCCCGGAACTCGAAGCACCGCCTTCTCCGCTTCCCTTCTGTCGCAAGGAAAACCCC	109	2	n	3.8e-05	++ ++++++ ++++
chr11:98773801-98774232	151	GCCCTCGCCCCGCCCCTCCCGGGCGTCCTGGGTCGTAGGCTGGCCCTAAAACCAAGCTGGGCCGGGACAACTGAG	157	2	n	1.4e-08	++++++++++++++
chr11:98773801-98774232	226	GGGAGGAGAGAAGGCGACAAGCGTTGCTCCGGCAACTTGAGGGGCGGAGCTCATTATGTAACGAGGCCGGGAGGC	262	2	y	1.3e-05	+++++++++ ++
chr11:98773801-98774232	301	AATGACCAATGAGATGGCGGCCACGGCTTCTACTGAATGAAAACAAATGCAGCACGTGGGCCCGGCTCTGCAGCC	303	1	n	1.4e-05	++++++++ +++ +
chr2:132131454-132131677	1	AGGGCAACCAATCAGGGAACTCTTAGAAAGGCCGCAGCCCCACCCACTCCAAGGGGCAGGGGAGGACACAGAGGG	5	1	n	9.3e-06	+++++++++++ +
chr2:132131454-132131677	1	AGGGCAACCAATCAGGGAACTCTTAGAAAGGCCGCAGCCCCACCCACTCCAAGGGGCAGGGGAGGACACAGAGGG	37	2	n	1.4e-06	+++++ ++++++++
chr2:132131454-132131677	76	GTTGGACTCATACCCTGCTGGCAGCAGCTCACCAGCTGCTCAGGAAGCAGAAACAGACCTGTCTGTCTCCTTTCT	132	3	n	3.6e-05	+++++++ +++ +
chr12:71015555-71016150	1	TGCGGGCTGCTGCTGCCGGGACAAAATGGCGCCGGGGAACCGGTTAGGCGCAGGCGCCTGGGGAAGAGCCGGCTC CGCCCCCGTGAAAAACCCTGGCTGCAGTTCTGGATTCCGTTTCCATGGGACACGCCACCGCCCAATCCTCGTGCG	72	2	n	3e-06	++ ++++++++
chr12:71015555-71016150	226	ATTTTTGGGCTCTCTTACTCAATCCTCTATCCTCCAATAACGTGCGTGTTCGGATACAGCCAATCAGAAGTGGAA	282	1	n	1.7e-08	++++++++++++++
chr12:71015555-71016150	301	GCTATCCTACCTGCTGTTTTCCGCACCAATCATGGAAGTTTCCCAGCTACATCCAATGAGAAAGGCAGACAGCGA	350	1	n	5.6e-06	++ +++++ ++++
chr12:71015555-71016150	376	GCTCCAATCCGAAGCTATTCGGCGTCATGAGCAGCCAATAGGAGTTCGTGTAGAAGCGAGTCTGCTCAACAGCTT	407	1	n	9.3e-06	++++++++ ++++
chr11:115514126-115514691	151	GCGCCAAGGGGCGAGGTAGGCTGGCCCTGAAAACGCCAAGGGGGACTGGGACCAACAGGCGCAGACGACTCCAAA	154	2	y	7.9e-05	++++++++ ++
chr11:115514126-115514691	226	AGCTAAACCACCAGGGCTCCACGAGCTTCTACCGCCGCGGGGCTCGCCGGACTCCCATTTTATAGAGCCAATAGG GCCCACCCTCCACATGCCGCCATTGGGCAATTTAAAAAGATCTCTTCATTTCTATTGGTTAGCTACAGTGCTAAT	300	2	n	3.1e-05	+ +++ +++ ++ +
chr11:115514126-115514691	226	AGCTAAACCACCAGGGCTCCACGAGCTTCTACCGCCGCGGGGCTCGCCGGACTCCCATTTTATAGAGCCAATAGG GCCCACCCTCCACATGCCGCCATTGGGCAATTTAAAAAGATCTCTTCATTTCTATTGGTTAGCTACAGTGCTAAT	348	1	y	1e-05	++ + ++++++++
chr11:115514126-115514691	376	CATAGATCGGCGTCAGGACGGGCTGCGCGGGAGACGGCTCGGCCTAAGCCCCGCCCCCTTCCTGTACAGAGAAAG	423	2	n	3.2e-09	++++++++++++ +
chr11:79992765-79993317	151	CCGGGCCCGCGGTCGGCAGCGCGCACGGGCCAACCAAGCCGCGCCTCCGCGAGAAGCGCCTCCGCGTGACTGACG GGGGACTCTGCGGACCAACGGGCTgggcggcccggcggcgcgcgctcccgccggccAATCAGAGCGCCGGGCGGG	215	3	y	1.2e-05	++++++++++ ++
chr11:79992765-79993317	151	CCGGGCCCGCGGTCGGCAGCGCGCACGGGCCAACCAAGCCGCGCCTCCGCGAGAAGCGCCTCCGCGTGACTGACG GGGGACTCTGCGGACCAACGGGCTgggcggcccggcggcgcgcgctcccgccggccAATCAGAGCGCCGGGCGGG	277	1	n	1.1e-06	+++++++++++++
chr11:79992765-79993317	301	GAAAGTGGGCGGAGCGAGGCCAGGGTAGGGTGAGCGGCCTCCGAAGCGGAGCGGGGCTCGGAGGAGACACTTTTT	302	2	y	2e-06	+++++++++ ++
chr4:119108630-119109364	1	AGAGCCAGACTGTGGTCAGTAGCCCTCCGTCCCTCCCCACCTCCCCACAGAACCACGCCTCTCAGAGTCCCGCCC CGGACGTGCTCCCCAGGCCCCGCCCCCTTCGGGCCCACCTACACCCCAGAACCAATGGCGGCGGTCCTATAAAAA	34	2	n	5.9e-05	++++ +++++++
chr4:119108630-119109364	1	AGAGCCAGACTGTGGTCAGTAGCCCTCCGTCCCTCCCCACCTCCCCACAGAACCACGCCTCTCAGAGTCCCGCCC CGGACGTGCTCCCCAGGCCCCGCCCCCTTCGGGCCCACCTACACCCCAGAACCAATGGCGGCGGTCCTATAAAAA	67	2	n	1.5e-05	++++++++++ +
chr4:119108630-119109364	1	AGAGCCAGACTGTGGTCAGTAGCCCTCCGTCCCTCCCCACCTCCCCACAGAACCACGCCTCTCAGAGTCCCGCCC CGGACGTGCTCCCCAGGCCCCGCCCCCTTCGGGCCCACCTACACCCCAGAACCAATGGCGGCGGTCCTATAAAAA	92	2	n	3.2e-09	++++++++++++ +
chr4:119108630-119109364	1	AGAGCCAGACTGTGGTCAGTAGCCCTCCGTCCCTCCCCACCTCCCCACAGAACCACGCCTCTCAGAGTCCCGCCC CGGACGTGCTCCCCAGGCCCCGCCCCCTTCGGGCCCACCTACACCCCAGAACCAATGGCGGCGGTCCTATAAAAA	107	2	n	3.8e-05	+ +++ +++++ ++
chr4:119108630-119109364	376	TGTGCTGCCGAGCGCGGGCCGGGGCGCCTGTCCGAGTCCCCGCTTCCTCACGCAGCCGCCGCGCGCTTCACGCGG TCGGGGCGGGGGCCGCGGATCAGGGGCCCAGGCGCCGCACGTCGCGCACGACCTCGGCGGCTCCTCCCGCGCGGG	449	2	y	2.4e-05	++ +++++++++
chr4:119108630-119109364	526	GGAGGGGGCCGGAGCGCGGCGCCCATTGGCTAAAAGAGCCGAGCCCCCGGCCGGGCCCCGGCTAGGAGCGGAGGA GGCGGGACCCGCCCGGAGCCCGCGCCGCGCCCGGAACCCGGGCCATGGGGGTGGCCAGGAGGAGAAGGCACTTCC	544	1	y	1.4e-05	+ ++ ++++++++
chr4:119108630-119109364	526	GGAGGGGGCCGGAGCGCGGCGCCCATTGGCTAAAAGAGCCGAGCCCCCGGCCGGGCCCCGGCTAGGAGCGGAGGA GGCGGGACCCGCCCGGAGCCCGCGCCGCGCCCGGAACCCGGGCCATGGGGGTGGCCAGGAGGAGAAGGCACTTCC	595	2	y	1.3e-07	++++++++++++++
chrX:71214797-71215169	76	TTAGGTCACCCAGCACTTTCCGCCCACCCCCAGATCACGTGTCCATGTCCTGCCAATCGGAACTGGGAGGAGGGA	92	2	n	8.8e-06	+ +++++++++++
chrX:71214797-71215169	76	TTAGGTCACCCAGCACTTTCCGCCCACCCCCAGATCACGTGTCCATGTCCTGCCAATCGGAACTGGGAGGAGGGA	125	1	n	2.3e-05	+ +++++++++++
chrX:71214797-71215169	151	GGGCATCTGTAGCCTGGAGTCTTCCAGGGCTCAAAGGCGGGGCAAGCGTGGAGGGGGCGGGTCGAGCGTGGCGGG GGCGGGGCGGAGCTCCGGAGCTGAGCAGCCTGGCAACAGCGGTGGCTCCCTGAGCCGGAGGTGAGTTCGCTTTCT	180	2	y	1.1e-05	+ +++++++++
chrX:71214797-71215169	151	GGGCATCTGTAGCCTGGAGTCTTCCAGGGCTCAAAGGCGGGGCAAGCGTGGAGGGGGCGGGTCGAGCGTGGCGGG GGCGGGGCGGAGCTCCGGAGCTGAGCAGCCTGGCAACAGCGGTGGCTCCCTGAGCCGGAGGTGAGTTCGCTTTCT	200	2	y	1e-06	++++++++++++ +
chrX:71214797-71215169	151	GGGCATCTGTAGCCTGGAGTCTTCCAGGGCTCAAAGGCGGGGCAAGCGTGGAGGGGGCGGGTCGAGCGTGGCGGG GGCGGGGCGGAGCTCCGGAGCTGAGCAGCCTGGCAACAGCGGTGGCTCCCTGAGCCGGAGGTGAGTTCGCTTTCT	220	2	y	4.9e-08	++ +++++++++++
chr3:95882042-95882611	1	ACGGTCGCGCCTGCCAGGTGATGCAATACCTCCCAACACCCCGATCTGCGGTCTTCCATGCCCACCCCATCCGGG	59	2	n	8.8e-05	+++ ++++ +++
chr3:95882042-95882611	151	CTTCACTGTCTGTGCTGGTCTAGCCGACCCACCTCCGCCTCACTCTGTGGGTCCCGCCCCTTCCCCCTCCCAGAC	176	2	n	6.7e-05	+ +++ +++++ ++
chr3:95882042-95882611	151	CTTCACTGTCTGTGCTGGTCTAGCCGACCCACCTCCGCCTCACTCTGTGGGTCCCGCCCCTTCCCCCTCCCAGAC	201	2	n	4.9e-08	++++++++++++++
chr3:95882042-95882611	226	ACGTGCGGTTCTGCACGTGCCTCCCCCTGCGTACACAGACCTTGTGCTCTCATTGGATAGCTTACCGGCAACACG	271	1	y	7.3e-06	++++ +++++ ++
chr3:95882042-95882611	301	TGACTCTAGATGCAGACGCTCACAGCCCATTTGCTACGGCACGCGGGGGCTCGGCCAATAGAGAGGCAGCCAAGT GGTGATTGGCTGGAAGGGAAGCAGTCCATGCTCCGCCCGTACATGCGGCTCCTCGGGTGATAAAAAAGGAGGATG	352	1	n	9.1e-05	++++++++ + ++
chr3:95882042-95882611	301	TGACTCTAGATGCAGACGCTCACAGCCCATTTGCTACGGCACGCGGGGGCTCGGCCAATAGAGAGGCAGCCAAGT GGTGATTGGCTGGAAGGGAAGCAGTCCATGCTCCGCCCGTACATGCGGCTCCTCGGGTGATAAAAAAGGAGGATG	374	1	y	3.7e-06	+ ++++++++++
chr3:95882042-95882611	301	TGACTCTAGATGCAGACGCTCACAGCCCATTTGCTACGGCACGCGGGGGCTCGGCCAATAGAGAGGCAGCCAAGT GGTGATTGGCTGGAAGGGAAGCAGTCCATGCTCCGCCCGTACATGCGGCTCCTCGGGTGATAAAAAAGGAGGATG	405	2	n	9.3e-05	++ ++++++ + +
chr3:95882042-95882611	451	GAAAAAAGTGAAAATTAAGGAAGGGGCGGAAAAGGGTGGAGCTCATAGCCTTAAATAGGACAGCACTGCGCGGGA	469	2	y	5.9e-06	+++++++++++ +
chr14:16364970-16365879	76	GGGTCCCGCCCCCCTAGGGGCCTGAAATTTTGGGATTGGTCGAAGTACTGTAGTGACAAGGCTGTGATTGGACGA	78	2	n	2e-06	++++++++++++
chr14:16364970-16365879	76	GGGTCCCGCCCCCCTAGGGGCCTGAAATTTTGGGATTGGTCGAAGTACTGTAGTGACAAGGCTGTGATTGGACGA	104	1	y	9.1e-05	++ +++++++++
chr14:16364970-16365879	76	GGGTCCCGCCCCCCTAGGGGCCTGAAATTTTGGGATTGGTCGAAGTACTGTAGTGACAAGGCTGTGATTGGACGA	136	1	y	2.1e-05	++ +++++++ ++
chr14:16364970-16365879	151	TCCATGGTTGACTGACAGCCGGTGACCACCGCACCCTCCCCCTCCCGGAGCGCGCCTGTGTGTGCCGTGTTATGC	157	3	y	1.5e-07	+++++++++++++
chr14:16364970-16365879	751	TGGGTGGTGAGTGCGGCGCGGGCGGGCGCATTGTTCGTGGGCCGCGGGCGACGCGGGCGGGGTGAGAGCGTGGTG	800	2	y	4.6e-05	+ + ++++++++
chr4:45012210-45012943	1	AGGGTCGCCTCACCTGAGCCGGGCTCCGCCCCCCTTCTCCTCGCAGGAGGAGGCGGTGGCCCTCCTCCGCTCGGA	23	2	n	1.4e-06	++ +++++++++
chr4:45012210-45012943	76	CCGACCCTGAGGAAGGAGGCGGGAAGGTCCAGACTGGCTTCCCCGGCTGTGACTTCCGCCCGCCCCGCCCCTCGC	87	2	y	3e-06	+ +++++++++++
chr4:45012210-45012943	76	CCGACCCTGAGGAAGGAGGCGGGAAGGTCCAGACTGGCTTCCCCGGCTGTGACTTCCGCCCGCCCCGCCCCTCGC	137	2	n	8e-08	++++++++++++ +
chr4:45012210-45012943	226	CCATGTCACCGCCTCCACAGGCCTCCAATGGCCAATCATCAGGAGGGCGGGGCCACAGTAGGAGTGACGTTCTGA	265	2	y	2.8e-07	++ +++++++++
chr4:45012210-45012943	301	AAATCTGACCAATCCGCCATCCCAGGACCCCGGCTGTGTTTACTACCACAGCATCCGTGAGCGCTCTGACCAATC ACAATTTGCCTTACAGCCCGTAAAACTGTTCTCAAAGATCTTTGAAGGCGGGACTTATCACTTAGCAACACCAGG	367	1	n	4.8e-06	++++++++++ ++
chr4:45012210-45012943	301	AAATCTGACCAATCCGCCATCCCAGGACCCCGGCTGTGTTTACTACCACAGCATCCGTGAGCGCTCTGACCAATC ACAATTTGCCTTACAGCCCGTAAAACTGTTCTCAAAGATCTTTGAAGGCGGGACTTATCACTTAGCAACACCAGG	416	2	y	2.4e-05	+ +++++++++
chr4:45012210-45012943	451	TTTGGCCTGTAGAAAAGCTATTTTATGTCACGCCCAATCAGAACTCAGCATGAATAAGGAAAGCTAGTGTTTTCC	481	1	n	3.6e-05	++ ++++++++++
chr4:45012210-45012943	526	GTCTACTTGAGCCAATCGCAATGACTACTGCCagccctgagtccctccattggctcgcgctgactgtgacctgga	534	1	n	1.4e-05	+++++++++ ++
chr4:45012210-45012943	526	GTCTACTTGAGCCAATCGCAATGACTACTGCCagccctgagtccctccattggctcgcgctgactgtgacctgga	568	1	y	9.7e-05	++ + +++++++
chr4:45012210-45012943	601	gtctgaaggacaggtgacttcctctcgctgtgagctggagattacttctaactTGTAGGTTTGAGAAAAGATGTA	602	3	y	3.3e-05	+++ +++++++
chr15:99392756-99393151	1	AAGAAGGCGGAGGCCTATTGCTAAGGTGCGGGTTGGTGGCTACAGTCTTGATTGACAGGGGTATTAGCCAATGAC	47	3	y	4.9e-07	+++++++++++++
chr15:99392756-99393151	76	TCTGACGAAAGCGGCTGCTGTTTATGAACGTGCAGATAACGGACAGGAGCAGTGCAGCCGGGGGCCAATGAGAAC	137	1	n	8.3e-06	+++++++ ++++
chr15:99392756-99393151	151	TCGCCTGGGCAGGTCTGAGGGCGGGGTTTCCCTAGGGGGCGGGTGTGGGTAGACTTCCAGCGCCAACCCCCGGAG	164	2	y	2.1e-05	+ ++++++++
chr15:99392756-99393151	151	TCGCCTGGGCAGGTCTGAGGGCGGGGTTTCCCTAGGGGGCGGGTGTGGGTAGACTTCCAGCGCCAACCCCCGGAG	182	2	y	5.6e-05	++++++++++
chr18:3507705-3508110	76	GGAGCCCGGCGGCTTGTCTGCCTTAGCCCGCGTCTGGCCCCGCCCCCTGCGGCTGGGCCCTGGGGCTAGAGGCGT	112	2	n	7.9e-09	++++++++++++ +
chr18:3507705-3508110	151	CCGCCAATCGGAGAGTGGAGGCGGGGCTTAGGGCGGGGCCGCGCTTGGCCCACTCTGGGCGCCGGGCGCTATTTA	164	2	y	6.6e-07	+ +++++++++++
chr11:69997203-69997466	1	AGTGGAGCGCGGCCGGCTGGGAACTCTGGGCTCCGGGCGCGTGTGAAGGACGGGGGCGGGCGGTGGCCTGGTCTC	49	2	y	3.1e-05	+ +++++++++
chr11:69997203-69997466	76	GCCCCGGGAGCGGTATGGCGGGGTGGGGCGCCAAGAGAGCCGAGTTGACTGGAGAGGCTGGGAGGGGGCGGGGCG	91	2	y	5.6e-05	++ ++++ +++++
chr11:69997203-69997466	76	GCCCCGGGAGCGGTATGGCGGGGTGGGGCGCCAAGAGAGCCGAGTTGACTGGAGAGGCTGGGAGGGGGCGGGGCG	136	2	y	1.1e-09	++++++++++++++
chr11:69997203-69997466	151	CCGGGCCTCGGGGTGGGGGAAGGGGAGCGCTATAGCGAGGCCGGGGAGGGCGCCGCGCCCAGGCTCCGCCCCTTG GGGCGGAAGGGGGAGCAGGGGCGGGTCCGGCACAGCTG	213	2	n	1.6e-06	++ +++++++++
chr11:69997203-69997466	151	CCGGGCCTCGGGGTGGGGGAAGGGGAGCGCTATAGCGAGGCCGGGGAGGGCGCCGCGCCCAGGCTCCGCCCCTTG GGGCGGAAGGGGGAGCAGGGGCGGGTCCGGCACAGCTG	239	2	y	1.8e-05	+ +++++++++ +
chr2:181459471-181459816	1	gaccccgcccccggcgcgcgcccggccgccgcTGATTGGTCCGCACTGcgccctggcctcggccaccgccccagt cccgcccccgcccccgcctgccggccccgcccccCGCTCCGCCGGCTGGGCGCAGCGGGCTGGCCGGGGCCGAGT	2	2	n	2.6e-06	++++++++++ +
chr2:181459471-181459816	1	gaccccgcccccggcgcgcgcccggccgccgcTGATTGGTCCGCACTGcgccctggcctcggccaccgccccagt cccgcccccgcccccgcctgccggccccgcccccCGCTCCGCCGGCTGGGCGCAGCGGGCTGGCCGGGGCCGAGT	29	1	y	1.3e-05	++ ++++++++++
chr2:181459471-181459816	1	gaccccgcccccggcgcgcgcccggccgccgcTGATTGGTCCGCACTGcgccctggcctcggccaccgccccagt cccgcccccgcccccgcctgccggccccgcccccCGCTCCGCCGGCTGGGCGCAGCGGGCTGGCCGGGGCCGAGT	74	2	n	2.3e-07	+++++++++++ ++
chr2:181459471-181459816	1	gaccccgcccccggcgcgcgcccggccgccgcTGATTGGTCCGCACTGcgccctggcctcggccaccgccccagt cccgcccccgcccccgcctgccggccccgcccccCGCTCCGCCGGCTGGGCGCAGCGGGCTGGCCGGGGCCGAGT	99	2	n	2.2e-08	++++++++++++ +
chr14:21500468-21501375	1	ACAGCCAATAAGGCCAAGCGCCTCTCCTGCGCCTAGATCCAATCCATTTCTAGAGGTAGAGGGGGCGGGTAGGTG	58	2	y	1.6e-05	+++++++++++
chr14:21500468-21501375	76	GAAGTAGAGGTGGCGCGGTGTCTGTGAGAGAGAAAAAGGGCTGGACCAATAGGTGCCCGGAAAAGGCGGGCCCCG	134	2	y	4.2e-06	++++ +++++++ +
chr14:21500468-21501375	151	CGGTCTGTTGATTGGTACTGGCAGTCGACCCTCCCTCGGGGTGGTGCCGGAGGTGGGGGGGGGGAAATGATGGGT	155	1	y	6.6e-05	++ ++++++++
chr14:21500468-21501375	151	CGGTCTGTTGATTGGTACTGGCAGTCGACCCTCCCTCGGGGTGGTGCCGGAGGTGGGGGGGGGGAAATGATGGGT	196	2	y	8.8e-05	+ +++++ ++++
chr14:21500468-21501375	301	GGGTGACGGACAGACCCGTAGGCCAACGGTTGGCCCTAAGTGTTCGTGCTCTCGTCCAATGGAAcggcgccgggg cggggccgcgTCTTGGGTTTAATGAGACTCCATTGGGCTGTAATCAGTGTCATGTCGGATTCATGTCAACGACAA	302	3	y	8.4e-06	+++++ +++++ +
chr14:21500468-21501375	301	GGGTGACGGACAGACCCGTAGGCCAACGGTTGGCCCTAAGTGTTCGTGCTCTCGTCCAATGGAAcggcgccgggg cggggccgcgTCTTGGGTTTAATGAGACTCCATTGGGCTGTAATCAGTGTCATGTCGGATTCATGTCAACGACAA	368	2	y	5.9e-06	+ ++++++++++
chr14:21500468-21501375	676	GTGGCCTGGGACCCTCGACGCCCCTCCCACAGGCCCCTGCGCGAGGGTCACCGCGGGGCCGCTCGGGGTCAGGCT	695	2	n	7.1e-05	+++++ +++++
chr14:21500468-21501375	751	GCCCCTGAGCGTGACGGTAGGGGGCGGGGGAGAGGAGGGAGGAGGAATAAGCTCCGCCCCTGGCCGAGCCTACGG	767	2	y	3e-06	+ +++++++++++
chr14:21500468-21501375	751	GCCCCTGAGCGTGACGGTAGGGGGCGGGGGAGAGGAGGGAGGAGGAATAAGCTCCGCCCCTGGCCGAGCCTACGG	801	2	n	3.4e-06	++ ++++++++ +
chr14:21500468-21501375	826	GGCAAGGGGCGGGGCTCAGGAATGGAAGGGCGGGGCAAAGTCGGGAGGGGCGGGGCAGAGGGATTCTAAGGCTTG	827	2	y	3.5e-08	+ ++++++++++++
chr14:21500468-21501375	826	GGCAAGGGGCGGGGCTCAGGAATGGAAGGGCGGGGCAAAGTCGGGAGGGGCGGGGCAGAGGGATTCTAAGGCTTG	848	2	y	2.3e-06	+++ +++++++++
chr14:21500468-21501375	826	GGCAAGGGGCGGGGCTCAGGAATGGAAGGGCGGGGCAAAGTCGGGAGGGGCGGGGCAGAGGGATTCTAAGGCTTG	868	2	y	1.4e-08	++++++++++++++
chr1:52119298-52119635	76	GGGGGGGGGACGGTGCGCTGATGGAACAGCCGGCCAATCTCTGCCGCTGATTGGCTGAGGCGGAAGGAGGCGGGA CGCCCTCTAGCCTTTTTTCCTGCCCGGTACTTTCGGTTTTCAGCGCCGAGTCTGTCAAAGCTCCCTGGAGACCTC	119	1	y	1.1e-06	++ +++++++++++
chr1:52119298-52119635	76	GGGGGGGGGACGGTGCGCTGATGGAACAGCCGGCCAATCTCTGCCGCTGATTGGCTGAGGCGGAAGGAGGCGGGA CGCCCTCTAGCCTTTTTTCCTGCCCGGTACTTTCGGTTTTCAGCGCCGAGTCTGTCAAAGCTCCCTGGAGACCTC	138	2	y	2.8e-07	+ ++++++++++++
chr1:57995873-57996141	1	AGCCCGCCCGGCTCACCCAGCCACGCCCACTCGACCCTCTCCAGTACGTCCCGCCCCTTCCGTCTTCCACTTCCG	20	2	n	2.4e-05	+++ +++++++++
chr1:57995873-57996141	1	AGCCCGCCCGGCTCACCCAGCCACGCCCACTCGACCCTCTCCAGTACGTCCCGCCCCTTCCGTCTTCCACTTCCG	48	2	n	4.9e-08	++++++++++++++
chr1:57995873-57996141	76	GGTGGCAGCGCATCTTTGCGCCGCCTTCTCGGAATCTGATTGGCTGGAGCATAAACGCTAACTGCCGCGCAGTTT	108	1	y	4.8e-06	++++++++++++
chr8:46152489-46152615	1	CTGAGTGACAGTggggcggggtcgccccgcccacccggggcgggggcggccggAAAGGGGCGCGACCAATCGCAG TGGACCCCGCTACTTCCCGAgccccgcccccgccccccggggACCGCGTCT	9	2	y	1.3e-05	+ +++++++++
chr8:46152489-46152615	1	CTGAGTGACAGTggggcggggtcgccccgcccacccggggcgggggcggccggAAAGGGGCGCGACCAATCGCAG TGGACCCCGCTACTTCCCGAgccccgcccccgccccccggggACCGCGTCT	24	2	n	9.9e-08	+++++++++++++
chr8:46152489-46152615	1	CTGAGTGACAGTggggcggggtcgccccgcccacccggggcgggggcggccggAAAGGGGCGCGACCAATCGCAG TGGACCCCGCTACTTCCCGAgccccgcccccgccccccggggACCGCGTCT	63	1	n	2.1e-05	++++++++++ ++
chr8:46152489-46152615	1	CTGAGTGACAGTggggcggggtcgccccgcccacccggggcgggggcggccggAAAGGGGCGCGACCAATCGCAG TGGACCCCGCTACTTCCCGAgccccgcccccgccccccggggACCGCGTCT	96	2	n	4.9e-08	+++++++++++ ++
chr2:118901247-118901590	1	TGCCCCCTGCGTCGGGACGACCGACCCACGATTCTGATTGGTTGGAGACCGGGAGGGGGAGCCGAGGGCCGGATT	31	1	y	2.1e-07	+++++++++++++
chr2:118901247-118901590	76	GGCTGGCGGGGCCAGCGCAGGGCGGGGCGGCTGATTGGCGGAGCTTGCCGAGGGGCGCGCCGCTGATTGGCTGAG	90	2	y	4.7e-06	+ + +++++++++
chr2:118901247-118901590	76	GGCTGGCGGGGCCAGCGCAGGGCGGGGCGGCTGATTGGCGGAGCTTGCCGAGGGGCGCGCCGCTGATTGGCTGAG	135	1	y	1.1e-06	++ +++++++++++
chr2:118901247-118901590	226	GGATCCCGGAgcccggcccccgctgctcgcccgtccggccgcctgccccgcccgtccggccctagccgtccgccc	270	2	n	1.1e-05	+++++++++ +++
chr2:118901247-118901590	301	gccccggccaggcgcgcccgccccccccgacggccccgcccga	315	2	n	1.1e-05	++++++++++++
chr9:57836819-57837156	1	CCGGCCGTCAGCCCGGGGCGGGGGAGGGGCAGGTAGGGGCGGGGCCCCACGGTGGGGGGCGGGGCCCGAGGCCGG	17	2	y	3.1e-05	++ +++++ +++++
chr9:57836819-57837156	1	CCGGCCGTCAGCCCGGGGCGGGGGAGGGGCAGGTAGGGGCGGGGCCCCACGGTGGGGGGCGGGGCCCGAGGCCGG	32	2	y	4.9e-08	++ +++++++++++
chr9:57836819-57837156	1	CCGGCCGTCAGCCCGGGGCGGGGGAGGGGCAGGTAGGGGCGGGGCCCCACGGTGGGGGGCGGGGCCCGAGGCCGG	52	2	y	4.9e-08	+ ++++++++++++
chr9:57836819-57837156	76	AAGCAGCTAAAAAGGGAACGAGGTGGGGGTGGGTGGGTAGTGCGAGACGGAAGTGACTCCTAGAGACCGCCCTCT	101	2	y	8.4e-05	++++++++ +++
chr9:57836819-57837156	151	GGTTGAAGCCGTGGGCGGAAGCCATTTAAGGCGGGCGGAGGCTTCGGCCAATGGGAGAGCACGGACTCAGAGGAG	158	2	y	6.3e-05	+ ++++++++ +
chr9:57836819-57837156	151	GGTTGAAGCCGTGGGCGGAAGCCATTTAAGGCGGGCGGAGGCTTCGGCCAATGGGAGAGCACGGACTCAGAGGAG	195	1	n	1.3e-05	++++++++ ++++
chr7:45643617-45643845	1	AGGACAAAGAGGCCGCTGCTCCCTGGCCCCGCCTCAAGCCCAAGGCGCTGGGAACTACTCGGCTACCCAGCACGG TGAGGGCGGGGCTGTGTACACATGGACCAATAAAGAGAAGAGAAAGAGAAATCGGGAAAATTAGCCAATGAAATG	26	2	n	5.9e-06	++++++++++ +
chr7:45643617-45643845	1	AGGACAAAGAGGCCGCTGCTCCCTGGCCCCGCCTCAAGCCCAAGGCGCTGGGAACTACTCGGCTACCCAGCACGG TGAGGGCGGGGCTGTGTACACATGGACCAATAAAGAGAAGAGAAAGAGAAATCGGGAAAATTAGCCAATGAAATG	74	2	y	8e-08	++ + +++++++++
chr7:45643617-45643845	1	AGGACAAAGAGGCCGCTGCTCCCTGGCCCCGCCTCAAGCCCAAGGCGCTGGGAACTACTCGGCTACCCAGCACGG TGAGGGCGGGGCTGTGTACACATGGACCAATAAAGAGAAGAGAAAGAGAAATCGGGAAAATTAGCCAATGAAATG	99	1	n	8.6e-05	+++++++ + ++
chr7:45643617-45643845	1	AGGACAAAGAGGCCGCTGCTCCCTGGCCCCGCCTCAAGCCCAAGGCGCTGGGAACTACTCGGCTACCCAGCACGG TGAGGGCGGGGCTGTGTACACATGGACCAATAAAGAGAAGAGAAAGAGAAATCGGGAAAATTAGCCAATGAAATG	137	1	n	9.3e-06	++++++++ + + +
chr7:45643617-45643845	151	TTGGAAAGGAGGTCTGATTTGCACCTAAGGGGCGGGTCTCAACCAAAAGCTTGAGGGTGTGGCCAATCATTGGTT	175	2	y	1.1e-05	++++++++++ +
chr7:45643617-45643845	151	TTGGAAAGGAGGTCTGATTTGCACCTAAGGGGCGGGTCTCAACCAAAAGCTTGAGGGTGTGGCCAATCATTGGTT	210	1	n	4.2e-05	++++++++++ ++
chr5:113164900-113165358	1	CTGGCTAAGGCAGGCTCCGGCCCCTGACTGACAGAACAGTTGTGGCCGGGTCCCGCCCCTTGAATGACTGGCAGA	23	3	y	2.4e-06	+ ++++++++++
chr5:113164900-113165358	1	CTGGCTAAGGCAGGCTCCGGCCCCTGACTGACAGAACAGTTGTGGCCGGGTCCCGCCCCTTGAATGACTGGCAGA	50	2	n	3.4e-06	++++++++++++
chr5:113164900-113165358	76	ACAGTAGAGGCCAGGCCCCGCCCTCTGGCTAAGGCAGGTCACGCCCCTGACTGACTGACAGAGCAGTTGTCCGGG CCCCGCCCTCTAAGACCAGCCCCGCCCCCTAACAACTGGGCCTGGACACCCTGACTGGTTAACACAGTGGGCCCT	90	2	n	2.3e-07	+++++++++ ++
chr5:113164900-113165358	76	ACAGTAGAGGCCAGGCCCCGCCCTCTGGCTAAGGCAGGTCACGCCCCTGACTGACTGACAGAGCAGTTGTCCGGG CCCCGCCCTCTAAGACCAGCCCCGCCCCCTAACAACTGGGCCTGGACACCCTGACTGGTTAACACAGTGGGCCCT	125	3	y	1e-05	++++++++++
chr5:113164900-113165358	76	ACAGTAGAGGCCAGGCCCCGCCCTCTGGCTAAGGCAGGTCACGCCCCTGACTGACTGACAGAGCAGTTGTCCGGG CCCCGCCCTCTAAGACCAGCCCCGCCCCCTAACAACTGGGCCTGGACACCCTGACTGGTTAACACAGTGGGCCCT	150	2	n	2.6e-06	+++++++++ ++
chr5:113164900-113165358	76	ACAGTAGAGGCCAGGCCCCGCCCTCTGGCTAAGGCAGGTCACGCCCCTGACTGACTGACAGAGCAGTTGTCCGGG CCCCGCCCTCTAAGACCAGCCCCGCCCCCTAACAACTGGGCCTGGACACCCTGACTGGTTAACACAGTGGGCCCT	169	2	n	1e-06	++++++++++++
chr5:113164900-113165358	226	GCTCATTCACTGAGGAGCTGCCCTGAAAACAGTTGGAAGCCCGCCCTACTCACTAACCGACCAACCACAAGTTGG	263	2	n	5.2e-05	+++++++ + +
chr5:113164900-113165358	301	AGCGCATGCCCTGCTCTCTGACTGACAGCTGTCTGACAGAACAGTGGAGGGCTGGGCCATGCTTAGTTACTGACA	317	3	y	6.5e-07	++++++++++++
chr5:113164900-113165358	376	CAAGTCCAAGGCAGTGCCTGCCCCAGCAGCTGACTGACAGACAGAGCAGGTGACGCCTGTACTCTGCGCTCAgac tgacagac	404	3	y	1.5e-06	++++++++++ +
chr5:113164900-113165358	376	CAAGTCCAAGGCAGTGCCTGCCCCAGCAGCTGACTGACAGACAGAGCAGGTGACGCCTGTACTCTGCGCTCAgac tgacagac	445	3	y	1.1e-05	+++++++++ +
chr7:100607317-100607916	1	ACCTTGGTTCCGGCTCCGCCTCCGTCCCACCTTCTTTTCCCTCCTCCTTCCTCCAATCGCCTTGCGTCGCGCCAC	13	2	n	4.2e-06	++ ++++++++ +
chr7:100607317-100607916	151	GTTAGCAGCTGCCTGCCCTCCGCTTTTTCTGATTGGCTCGATTTGTCACTGACGTAAGCGCCCCCTTTTTTTTCT	176	1	y	5.3e-07	++++++++++++
chr7:100607317-100607916	226	CCCCCCCTTGCTTACCCGGAACTCGGTCCCGCCTCCTCCCGGCTTCTCCAGACGCCAGTCGAAACCTGATCGGCC	251	2	n	1.3e-07	++++++++++++++
chr14:52244469-52244800	1	TCTCCAGCACCAGTTCCCCTCCTTCTACGCAACCTAACTTGATGCGCTTGCCCGCCCCACACTCTCATTGGCTAA	61	1	y	1.9e-06	++++ ++++++++
chr14:52244469-52244800	76	CACGGACTGCCACTCAACCAAAGACGCAGAAACGCAAAACAGCGCAAGGGCGGGACTAAAAGCAGCTCCCTTCCC	80	3	n	2.6e-05	+ +++ ++ ++++
chr14:52244469-52244800	76	CACGGACTGCCACTCAACCAAAGACGCAGAAACGCAAAACAGCGCAAGGGCGGGACTAAAAGCAGCTCCCTTCCC	118	2	y	3.4e-06	+ + +++++++++
chr17:63863769-63864083	1	CAACTCCAGCCTCCGCCCACTCGCTGAGCTCCGCCCCTCGCGGGTCCGAGCCAATGGGCCGCGCCCGCCTCCTGG	10	2	n	1.6e-05	+ ++++++++++
chr17:63863769-63864083	1	CAACTCCAGCCTCCGCCCACTCGCTGAGCTCCGCCCCTCGCGGGTCCGAGCCAATGGGCCGCGCCCGCCTCCTGG	28	2	n	1e-06	++ +++++++++ +
chr17:63863769-63864083	1	CAACTCCAGCCTCCGCCCACTCGCTGAGCTCCGCCCCTCGCGGGTCCGAGCCAATGGGCCGCGCCCGCCTCCTGG	62	2	n	4.3e-05	++++++++++
chr17:63863769-63864083	76	GAGGTTGTAGAAGAGGGGGTTGGGGCCGGTGGCAGCGCCCGCCCCTTGCTCCTTCTCATTGGCTAAACTCTCGGG	111	2	n	2.1e-05	++++++++++ +
chr17:63863769-63864083	76	GAGGTTGTAGAAGAGGGGGTTGGGGCCGGTGGCAGCGCCCGCCCCTTGCTCCTTCTCATTGGCTAAACTCTCGGG	127	1	y	2.1e-07	+++++ ++++++++
chr17:63863769-63864083	151	GTGCCCGGAGACCGGAGTGTAGCGGGATTGGCTGTCGAGCCTCGCAACGGTGGCGCCTATTGGCTGGAGCAGTCC	203	1	y	1.8e-05	+ ++ ++++++++
chr6:146577406-146578104	151	AGGCCGAACCGGAAGAGGGCGGAGCAAGTGAGGGGAAAAAAAAAGCCTTTAACATTTGTTCCCAATCAACCGTAG	162	2	y	6.6e-07	+ ++ ++++++ ++
chr6:146577406-146578104	301	TCTGGACAGGCAGAGCCTACCCACCCAACCTCCCCTCTCCGCCTCCAGTCCGGGCCGGTAGCCCCTCGGAAAACA	336	2	n	3.1e-05	+ ++++++++
chr6:146577406-146578104	376	CGCGAGAGTGTGCGAGCGGCAGAGCAAAACCTTGAGAGGGGGGCGAGGAGAGAAGCCCCGCCCCCTCCCCGTTCT	411	2	y	4e-05	+ ++++++++ ++
chr6:146577406-146578104	376	CGCGAGAGTGTGCGAGCGGCAGAGCAAAACCTTGAGAGGGGGGCGAGGAGAGAAGCCCCGCCCCCTCCCCGTTCT	430	2	n	1.1e-09	++++++++++++++
chr6:146577406-146578104	451	CCAATCAACGGCCAGCCGTTTACCGGGGGTGGGGCCTTCGGGAACCAGCAGAGGGAAGTCTCGCGAGGCTTGTCG	472	2	y	1.4e-05	+++++ +++++
chr5:109845003-109845237	1	AAGGGACCTTTCAAGCCTGCTCAGCTACTAAGCGAAACCGACCCAAGGTATCCGGAAAAACCCGCCTTCCCTTCT GACTGGCAGGTCCCCCTAGAGGCTCTGATTGGCCAGTAAGTCTTGAGTGACTCGAGCACCTCCCTTAGGGTTAGG	59	2	n	6.7e-05	+++++++ +++
chr5:109845003-109845237	1	AAGGGACCTTTCAAGCCTGCTCAGCTACTAAGCGAAACCGACCCAAGGTATCCGGAAAAACCCGCCTTCCCTTCT GACTGGCAGGTCCCCCTAGAGGCTCTGATTGGCCAGTAAGTCTTGAGTGACTCGAGCACCTCCCTTAGGGTTAGG	73	3	y	8.4e-06	++++++ +++++
chr5:109845003-109845237	1	AAGGGACCTTTCAAGCCTGCTCAGCTACTAAGCGAAACCGACCCAAGGTATCCGGAAAAACCCGCCTTCCCTTCT GACTGGCAGGTCCCCCTAGAGGCTCTGATTGGCCAGTAAGTCTTGAGTGACTCGAGCACCTCCCTTAGGGTTAGG	97	1	y	9.3e-07	+++++++++++++
chr3:108653795-108654069	1	TGAACTGGTGGTTGGGTAATTGAAAAGCCCTTACTTCAGAGCAGAGGAGCGCGGCCTGGTcccgcccccgcctcc	59	2	n	2.3e-07	+++++++++++ ++
chr3:108653795-108654069	76	gcccccgcGGCGCAGCCAATCAGCAACGCGCGCGGGAAGGCCGCACAGCTGCGGGCCGAGCGAGTCGATGAGTCC	88	1	n	9.3e-07	+++++++++++ +
chr10:7667478-7667646	1	CATCCAATCAGAACTGCGCAGGAAGGGGCGGGCCTGAGGAGCGCGCAGTGTGCTTTCTGCTGAACCTTCTTGCTG	1	1	n	1.7e-06	++ ++++++++++
chr10:7667478-7667646	1	CATCCAATCAGAACTGCGCAGGAAGGGGCGGGCCTGAGGAGCGCGCAGTGTGCTTTCTGCTGAACCTTCTTGCTG	21	2	y	4.8e-07	++++++++++++ +
chr3:88141979-88142536	226	TGGTCGCGCGCCCCAAAGGGGTGGGGCGCAGGCCGCGGGCAGGGGGCGGGGTTGCGTCCCAGGCCTCCCTGCCAG	239	2	y	4.2e-06	++++++ +++++
chr3:88141979-88142536	226	TGGTCGCGCGCCCCAAAGGGGTGGGGCGCAGGCCGCGGGCAGGGGGCGGGGTTGCGTCCCAGGCCTCCCTGCCAG	264	2	y	4.8e-07	+ +++++++++++
chr3:88141979-88142536	301	GCCCCGCCCCCAGCCCTGCGGGGCCCTCCCATTGGCCCCCTGCTTGTCCATCACTCTCGTCTTTTCCCCCCCTCC	301	2	n	6.4e-08	+++++++++++ +
chr3:88141979-88142536	301	GCCCCGCCCCCAGCCCTGCGGGGCCCTCCCATTGGCCCCCTGCTTGTCCATCACTCTCGTCTTTTCCCCCCCTCC	325	1	y	2.3e-05	+++++ +++++++
chr3:88141979-88142536	301	GCCCCGCCCCCAGCCCTGCGGGGCCCTCCCATTGGCCCCCTGCTTGTCCATCACTCTCGTCTTTTCCCCCCCTCC	342	3	n	2.4e-05	++ ++++ +++++
chr14:56811729-56812807	1	GGGCCCGGGGAGGCCCCGCCCTCCGCACGCTCATTGGCTGATGGCGTGGGCGGCACGGAATGCCTCGGGCAGGCT	13	2	n	1.3e-07	+++++++++ ++ +
chr14:56811729-56812807	1	GGGCCCGGGGAGGCCCCGCCCTCCGCACGCTCATTGGCTGATGGCGTGGGCGGCACGGAATGCCTCGGGCAGGCT	27	1	y	1e-05	+ ++ ++++++++
chr14:56811729-56812807	76	CCATTGGCCCAGTCGGCCTTCTTTCAGGACCCTCCTCGGTGAGGTAGTCACGGCGGCTGTCCGTCAGACCTGGGC CACGCCCTCGGGCCTGCCGGccccccccccccccccccccGCCGCCAGCCCCGGGCTGGGCCGGccctccctctc ttccgccctccctccgtgcccccgccccgcccccactcGCGGGGTCTGCCCGGGTCAGGAGCCCGAGTGGCGCTG	130	3	n	3.5e-06	+++++++ ++++
chr14:56811729-56812807	76	CCATTGGCCCAGTCGGCCTTCTTTCAGGACCCTCCTCGGTGAGGTAGTCACGGCGGCTGTCCGTCAGACCTGGGC CACGCCCTCGGGCCTGCCGGccccccccccccccccccccGCCGCCAGCCCCGGGCTGGGCCGGccctccctctc ttccgccctccctccgtgcccccgccccgcccccactcGCGGGGTCTGCCCGGGTCAGGAGCCCGAGTGGCGCTG	149	2	n	8.4e-05	+++ +++++ +
chr14:56811729-56812807	76	CCATTGGCCCAGTCGGCCTTCTTTCAGGACCCTCCTCGGTGAGGTAGTCACGGCGGCTGTCCGTCAGACCTGGGC CACGCCCTCGGGCCTGCCGGccccccccccccccccccccGCCGCCAGCCCCGGGCTGGGCCGGccctccctctc ttccgccctccctccgtgcccccgccccgcccccactcGCGGGGTCTGCCCGGGTCAGGAGCCCGAGTGGCGCTG	225	2	n	4.6e-05	+ ++++++ +++
chr14:56811729-56812807	76	CCATTGGCCCAGTCGGCCTTCTTTCAGGACCCTCCTCGGTGAGGTAGTCACGGCGGCTGTCCGTCAGACCTGGGC CACGCCCTCGGGCCTGCCGGccccccccccccccccccccGCCGCCAGCCCCGGGCTGGGCCGGccctccctctc ttccgccctccctccgtgcccccgccccgcccccactcGCGGGGTCTGCCCGGGTCAGGAGCCCGAGTGGCGCTG	249	2	n	1.3e-07	+++++++++++ +
chr14:56811729-56812807	301	CCCGCAGTTCGGCTCGCGCTTCGGCCCTGGGGGCGGGCGATATTCGTCGAGGCTTCCGGTGGGCCCGGGATCGGG	326	2	y	3.8e-05	+++++++++
chr14:56811729-56812807	451	CCCGGCGTCCTCCCTGTCCAGGCCCCCAAGACCCCGGCGACTGGCGAGCCCGGCAATGCCTGCGGCGGACCGAGG GGGCGAGCCCGGCCGCGGCCGCAAGGGGACTGGTGCGCTGGCGGCCGTGCAGGCGCTTCCACCTTGCCTGGCCCG	521	2	y	4.3e-05	+++++++++ + +
chr14:56811729-56812807	601	TGGGAAGGGTGTCCCACCTCCGCCATGGCTGCGGCGGGAGGAGACGTCGGCCTCCATTTTGTGGGATCTGTTGGG	611	2	n	1.5e-05	+++++ +++++ ++
chr8:83594257-83594780	151	GCACCAAACACCACCCAGCTCCACACACACTCGGGGAGCAGCACTCCCGGACTCCGGCTCCGCCCCCCTCTATGC	207	2	n	3.4e-07	++ +++++++++ +
chr8:83594257-83594780	226	GTGCGTCCCTCCTGCCAATCAGCGTGGGGTGCACCCACTGCTCGCGCCACACAACTGACCAATCAGATTTCTCGA	235	3	n	1e-05	++++ ++++++
chr8:83594257-83594780	226	GTGCGTCCCTCCTGCCAATCAGCGTGGGGTGCACCCACTGCTCGCGCCACACAACTGACCAATCAGATTTCTCGA	281	1	n	1.3e-05	++++++++++++
chr8:83594257-83594780	301	TCCAAGGAGCGCAGCGGACCCCCTCCCCCCCACTTTGGCAAGCAAGATTAAAACCCGGCCACCCACCAATCAAAA GGAAGCCTGGGCGCCGCGCGCCCTCTGGCTCCGCCCATTGCAGTGTTGCGGTGGAAATCCAGCGACGTCAGGCTG	363	1	n	1.8e-05	+ ++++++++ +++
chr8:83594257-83594780	301	TCCAAGGAGCGCAGCGGACCCCCTCCCCCCCACTTTGGCAAGCAAGATTAAAACCCGGCCACCCACCAATCAAAA GGAAGCCTGGGCGCCGCGCGCCCTCTGGCTCCGCCCATTGCAGTGTTGCGGTGGAAATCCAGCGACGTCAGGCTG	403	2	n	1.6e-06	++ +++++++++ +
chr19:46573087-46573581	76	AGCGGGATGGGGCGGGGTTCTGCTCCTCTCTACCCAAAGTGCGCAAGCGCGCCAAAGCGCCCGCCCATTGCGCAG	80	2	y	3.4e-06	+++ +++++++++
chr19:46573087-46573581	76	AGCGGGATGGGGCGGGGTTCTGCTCCTCTCTACCCAAAGTGCGCAAGCGCGCCAAAGCGCCCGCCCATTGCGCAG	133	2	n	3.3e-05	++++++++++ +
chr19:46573087-46573581	151	GCGGTCTCGGGAGGGGCGGGAGGGCGGGGCGGGCTGGTGAGCGACCCAGCGGGAGGTGCAAAGCCGCCCACGTGG	167	2	y	1.3e-07	+++ +++++++++
chr19:46573087-46573581	226	CTGGCCGGAGCCTGTGGCCTCTGATTGGTCGGAAGTGGGGGCGTAGGGCGAGGGGGTGGTTCCCGGGCCTAGCCG	243	1	y	7.6e-07	++++++++++++++
chr1:43933712-43934191	1	TAAGCCAACCTCGGCGGCGTCGCGAGGATCCCACGCCTCAGGCAGACAGCCCGTTCCTCTCGCTGCTTCTCACGG AGAGTGACAGCTCGGAAGGCAAGAACCTCCCTCCAGTGCGTTGTCATCCGCAGCAGCGCACACTCCGTTCCAGCT	74	3	y	7.7e-06	+ ++ ++++++++
chr1:43933712-43934191	151	CTGCAGCCTGGGTAACATTCCCTCGTCGTGACTCGTAGCGGCGCCGTTAGCTTACGTTGAAGCGTATGATTGGCT AGACACCTCTGACCGCACACGATTGGGTACTGGTGGCCAGGCTCCGCCCCTTCCCCACCTCCGTCCCGCGGTAGC	213	1	y	3.3e-05	+ + ++++++++++
chr1:43933712-43934191	151	CTGCAGCCTGGGTAACATTCCCTCGTCGTGACTCGTAGCGGCGCCGTTAGCTTACGTTGAAGCGTATGATTGGCT AGACACCTCTGACCGCACACGATTGGGTACTGGTGGCCAGGCTCCGCCCCTTCCCCACCTCCGTCCCGCGGTAGC	266	2	n	2.3e-07	++ +++++++++++
chr5:30921386-30921969	76	CTGCGAAGGCTGGCAGCGTTCCCCGTCACGTGACACCGTTAATCTggcgcggggggggggggcggggcctcggcc	130	2	y	1.9e-09	++++++++++++++
chr5:30921386-30921969	301	TGCGCTTTCGCTTTGACAGCTGAGGCGGAAAAGTGAGAGGGCCTGCCATTGGCCGGGCTAGGTAACCCACCCTTG	342	1	y	2.3e-05	+++ + ++++++++
chr7:127273971-127274279	76	AGCCACGCTGCCTGTCGGAGCGCCGCGCGGcctctatttatatacagcgtgattgacagctgctctatccaatga	123	3	y	5.4e-08	++++++++++++++
chr7:127273971-127274279	151	cgattcccgtaccgagaggcgggcttcctttactcaaaaaggtgtattacaaattaacCGTCTGCTTGCACAACC	162	2	y	3.8e-05	++++++++++
chr10:81320364-81321082	1	AGCCACGCCCCTTTGACGTCCTTTTCCAAGCCCAGCAAGACCCCTAAGCGCAGTTTCTGGGTTCATTGGCCCCGC CCTCAGATCCAATGTGTCCATCTCGCCCCCAAGGTCCCGCCCACCGCCGCTCTACTTCCTCCCACTCCTCAGTCG	2	2	n	3.1e-05	+++ ++++++++
chr10:81320364-81321082	1	AGCCACGCCCCTTTGACGTCCTTTTCCAAGCCCAGCAAGACCCCTAAGCGCAGTTTCTGGGTTCATTGGCCCCGC CCTCAGATCCAATGTGTCCATCTCGCCCCCAAGGTCCCGCCCACCGCCGCTCTACTTCCTCCCACTCCTCAGTCG	69	2	n	4.2e-06	+++++++++ +
chr10:81320364-81321082	1	AGCCACGCCCCTTTGACGTCCTTTTCCAAGCCCAGCAAGACCCCTAAGCGCAGTTTCTGGGTTCATTGGCCCCGC CCTCAGATCCAATGTGTCCATCTCGCCCCCAAGGTCCCGCCCACCGCCGCTCTACTTCCTCCCACTCCTCAGTCG	109	2	n	4e-07	++++++++++++ +
chr10:81320364-81321082	151	GCCACTCTCGACTACATATCCTGCCCGTACCCATTCACAGTTCGTAGTTACAGATGTCAATCTTGCCTCAATCAG	202	3	n	1.9e-05	++ ++++++++ +
chr10:81320364-81321082	226	CCCCTCTTCCACCCTCTCAAATCCTGATATGCACTCCTCCGCCCATTGGTCTACGCCTGTCAATCTAGTTTACCA	261	2	n	3.8e-05	+ +++++++++
chr10:81320364-81321082	226	CCCCTCTTCCACCCTCTCAAATCCTGATATGCACTCCTCCGCCCATTGGTCTACGCCTGTCAATCTAGTTTACCA	280	3	n	7.2e-07	+++++++++++ ++
chr10:81320364-81321082	301	GACCCCGCCCACCCCGGCTCCCGTAACCGCCATTCTTGCGTTCCTTCTCAGGCCACGCCCAGCGCAGGTCCCCGG	302	2	n	7.6e-07	+++++++++++++
chr10:81320364-81321082	376	CCGGGTCTCCCGATCTACAGTTGTCGATCTCCGTAAGCCCCGCCTAACCCAGCCCTATTCTTTCCCCATAAGCTC	412	2	n	3.8e-06	++++++++++ +++
chr10:81320364-81321082	451	CTCTACTAGGCTCCGCCCCTAGGGCACTGCCCATGCAAGTGCAGGCTCCGCCCACTAGGCGCCTCTTCCGCCCTG	460	2	n	3.8e-06	++ ++++++++
chr10:81320364-81321082	451	CTCTACTAGGCTCCGCCCCTAGGGCACTGCCCATGCAAGTGCAGGCTCCGCCCACTAGGCGCCTCTTCCGCCCTG	495	2	n	2.6e-06	++ +++++++++
chr10:81320364-81321082	526	GAACAACCGCCTCGTAGCTCCGCCTCCCTAAGCACGCTACTCGCCGGTCACCTAGGGCGCGAGGGAGGGCCCACC	542	2	n	1.2e-05	++ +++++++++
chr5:109866413-109866886	226	CTCAAGACTTACTGGCCAATCAGAGCCTTTAGGCGAACCTGCCAGTCAGAAGGGAAGGCGGGGTTTCCGGGTGCC	238	1	n	9.3e-07	+++++++++++++
chr5:109866413-109866886	226	CTCAAGACTTACTGGCCAATCAGAGCCTTTAGGCGAACCTGCCAGTCAGAAGGGAAGGCGGGGTTTCCGGGTGCC	262	3	n	8.4e-06	+++++ ++++++
chr5:109866413-109866886	226	CTCAAGACTTACTGGCCAATCAGAGCCTTTAGGCGAACCTGCCAGTCAGAAGGGAAGGCGGGGTTTCCGGGTGCC	276	2	y	7.9e-06	+++ ++++++++
chr8:105278922-105279404	1	AGAGTAACGCAAATTACGCCCCGCCCCCTTCTCTCCTTCTTGACACAGCAGAAATGGGCAACGTGCAGGAGCGCC	18	2	n	3.2e-09	++++++++++++ +
chr8:105278922-105279404	226	TGCGCCGCCTACTGCTGTTGGTGCAGAGCAAGGGCGAGGCAGCCTGCCAGGAGCTACTGCGCTGTGCCCAGCAAA	252	2	y	7.5e-05	+ + +++++ +++
chr8:105278922-105279404	301	CAGTGCGCATGCCAGACCCGGCCTGGGATTGGCAGCACGTGGGGCCCGGTGAGCACCAAGAGGGTGGAGCCTTGA	324	3	y	8.8e-05	+ +++++ ++++
chr8:105278922-105279404	301	CAGTGCGCATGCCAGACCCGGCCTGGGATTGGCAGCACGTGGGGCCCGGTGAGCACCAAGAGGGTGGAGCCTTGA	357	2	y	1.9e-05	++ +++ ++ ++
chr8:46617175-46617605	1	CAGAGATGGCGGGAACCAGAGCTTGAAACCCGCGCGAGGGGGCGGAGCCGGAGGGGGCGGGGCCCTAGGCTTGCC	35	2	y	2.8e-07	++++++++++ ++
chr8:46617175-46617605	1	CAGAGATGGCGGGAACCAGAGCTTGAAACCCGCGCGAGGGGGCGGAGCCGGAGGGGGCGGGGCCCTAGGCTTGCC	50	2	y	1.1e-09	++++++++++++++
chr8:46617175-46617605	76	CTGGGTGGGCGGGGCCTGCGCTACGAGACGGGGCTCAGTCGGGGCTGAAACCACCAATCGCGACTGGCGTGTGCG	77	2	y	1e-06	+++++++++++++
chr8:46617175-46617605	151	AGATGAGGTGTTGGGGGGTGTGTGAGGGGGGATGGGGCGGGGAGGTAGAGAAGGGGCGTGGCGTGGGGCGTGACC	180	2	y	3e-06	+++ +++++++++
chr8:46617175-46617605	151	AGATGAGGTGTTGGGGGGTGTGTGAGGGGGGATGGGGCGGGGAGGTAGAGAAGGGGCGTGGCGTGGGGCGTGACC	199	2	y	2.8e-05	+++++++++ +++
chr8:46617175-46617605	376	AGCTGGCGCTCTTTTGGCGGGTCTGCAGCTCCTTGGAGGAGGCGGGGGAAACGGG	410	2	y	3e-06	+++++++++++++
chr11:80080897-80081420	76	GCCTCGCGCAGCGGAAGCGCCGCCCCGCCCTGCCCTGTCCTTCACGCCCCGCCCCCGCTGCCGCTTGATTGACAG ACGCCGGGGGGTGGGGGTGGGGGGGACACAGGCACTAATGGCGCCTTGGTCTGAGTGAGTGAAACCTGCTGCGCC	97	2	n	2.3e-06	+++++++++ +++
chr11:80080897-80081420	76	GCCTCGCGCAGCGGAAGCGCCGCCCCGCCCTGCCCTGTCCTTCACGCCCCGCCCCCGCTGCCGCTTGATTGACAG ACGCCGGGGGGTGGGGGTGGGGGGGACACAGGCACTAATGGCGCCTTGGTCTGAGTGAGTGAAACCTGCTGCGCC	121	2	n	3.4e-07	+++++++++++ +
chr11:80080897-80081420	76	GCCTCGCGCAGCGGAAGCGCCGCCCCGCCCTGCCCTGTCCTTCACGCCCCGCCCCCGCTGCCGCTTGATTGACAG ACGCCGGGGGGTGGGGGTGGGGGGGACACAGGCACTAATGGCGCCTTGGTCTGAGTGAGTGAAACCTGCTGCGCC	139	3	y	2e-07	++++++++++++ +
chr11:80080897-80081420	76	GCCTCGCGCAGCGGAAGCGCCGCCCCGCCCTGCCCTGTCCTTCACGCCCCGCCCCCGCTGCCGCTTGATTGACAG ACGCCGGGGGGTGGGGGTGGGGGGGACACAGGCACTAATGGCGCCTTGGTCTGAGTGAGTGAAACCTGCTGCGCC	160	2	y	2.4e-05	++ +++++ ++++
chr11:80080897-80081420	451	GCTCTGGGCCTTAAATCGTCGCTGTACTACCTTCCTAGTAAATGCCAGCTGAGGCGGGAATTTTGGGAGGATA	497	2	y	6.7e-05	+ +++++++++
chr4:43656441-43656936	1	TCCTGAGAGTGTCGCCTGCAGGCGCAGCCCCATTGGCCGTGGCCTGCTGGGGGGCGGGTCCCGTCGTACATCTCA TTGGCTGCCTCTGCGAACGCAGGGCCAATTTTTGTTTGGTAGCGTGAAAACTCTTTTTCCATTGGGTCCCTACGC	47	2	y	8.8e-06	++++++++++ +
chr4:43656441-43656936	1	TCCTGAGAGTGTCGCCTGCAGGCGCAGCCCCATTGGCCGTGGCCTGCTGGGGGGCGGGTCCCGTCGTACATCTCA TTGGCTGCCTCTGCGAACGCAGGGCCAATTTTTGTTTGGTAGCGTGAAAACTCTTTTTCCATTGGGTCCCTACGC	69	1	y	5.6e-06	+ +++ ++++++++
chr4:43656441-43656936	151	AGTTTCACTCTGAGATACATTCCCATTCCATTGGAAGGACTAAACCTGGGGGTGGGATATTCTCCTAATGGACTC	195	2	y	4.6e-05	+++++ ++++
chr4:43656441-43656936	301	GGTGAAGAGGGCGGGGCCTCGCCACCTGCTGTACAAAAGGCTAAAAGTAGCGCAGACCCATCTCCGCATTGGTCA GGAGGGCGGGGTTCTGAGGACATTCGGTGTTTATTGGCTCCCGAAGAACATGGGCGGGACTCAAGGTGAATTGGG	304	2	y	3.5e-08	+ ++ +++++++++
chr4:43656441-43656936	301	GGTGAAGAGGGCGGGGCCTCGCCACCTGCTGTACAAAAGGCTAAAAGTAGCGCAGACCCATCTCCGCATTGGTCA GGAGGGCGGGGTTCTGAGGACATTCGGTGTTTATTGGCTCCCGAAGAACATGGGCGGGACTCAAGGTGAATTGGG	374	2	y	3.4e-06	++ ++++++++
chr4:43656441-43656936	301	GGTGAAGAGGGCGGGGCCTCGCCACCTGCTGTACAAAAGGCTAAAAGTAGCGCAGACCCATCTCCGCATTGGTCA GGAGGGCGGGGTTCTGAGGACATTCGGTGTTTATTGGCTCCCGAAGAACATGGGCGGGACTCAAGGTGAATTGGG	402	1	y	1.9e-05	+ + +++++++
chr4:43656441-43656936	301	GGTGAAGAGGGCGGGGCCTCGCCACCTGCTGTACAAAAGGCTAAAAGTAGCGCAGACCCATCTCCGCATTGGTCA GGAGGGCGGGGTTCTGAGGACATTCGGTGTTTATTGGCTCCCGAAGAACATGGGCGGGACTCAAGGTGAATTGGG	422	2	y	6.5e-06	+++++++++++
chr9:124282199-124282458	1	AAGAACCCTCCTCTTCTTCTGACTGGCAGGTCCGTCTCAAGGCTCTGATTGGCCAGTGGTCTTGAGTGACTTGAG	18	3	y	8.4e-06	++++++ +++++
chr9:124282199-124282458	1	AAGAACCCTCCTCTTCTTCTGACTGGCAGGTCCGTCTCAAGGCTCTGATTGGCCAGTGGTCTTGAGTGACTTGAG	42	1	y	9.3e-07	+++++++++++++
chr9:124282199-124282458	76	CACCTTCCCTAGGGTTAGACTGAGTTTAAGGGACCCGGTGGAGGTGGAGAGACGTTCTCAGCCGCGGCTTCCAGT	112	2	y	5.6e-05	++ +++++ ++ +
chr9:122805449-122805794	1	ACGGCTGCTCAGCAAGAACTGCGTCACCAGAGCGCCTTGCATAGCTCCGCCCCTTCCCCCCTCCCCACCAGGGGC	44	2	n	2.3e-07	++ +++++++++++
chr9:122805449-122805794	76	TGCGCGTGCGCGCTTTGGCCCCGCCCCTGCCTCCCGCTACTCCTTTACCTTTGCTTATCGTCCTCCCACCTGCCT GCCAATCATCTTTCTCCCTCAGACCTAGTCGGCCGGAAGAACCGGCTTGTGTCTCCCGAAGCTGCCTTCGGAAAC	93	2	n	1.5e-07	+++++++++++ ++
chr9:122805449-122805794	76	TGCGCGTGCGCGCTTTGGCCCCGCCCCTGCCTCCCGCTACTCCTTTACCTTTGCTTATCGTCCTCCCACCTGCCT GCCAATCATCTTTCTCCCTCAGACCTAGTCGGCCGGAAGAACCGGCTTGTGTCTCCCGAAGCTGCCTTCGGAAAC	147	3	n	5e-06	+++++ ++++++
chr1:36709928-36710269	1	TGGACGGATGCGACTCCAGACACCGCGCCGCTCCCCTCCCCCAGTGCGCTGCCTACGCGAACGCGGCCCCGTGGC CAATCACAGATGCCAAATGACCTGATTGACGGCCGGCGCCGGGGAGGGTTGCTGGGGGAAGTGGGAGGGGCCTCT	72	1	n	3.7e-06	++++++++++ ++
chr1:36709928-36710269	1	TGGACGGATGCGACTCCAGACACCGCGCCGCTCCCCTCCCCCAGTGCGCTGCCTACGCGAACGCGGCCCCGTGGC CAATCACAGATGCCAAATGACCTGATTGACGGCCGGCGCCGGGGAGGGTTGCTGGGGGAAGTGGGAGGGGCCTCT	96	3	y	1.9e-06	+ ++++++++ +++
chr1:36709928-36710269	1	TGGACGGATGCGACTCCAGACACCGCGCCGCTCCCCTCCCCCAGTGCGCTGCCTACGCGAACGCGGCCCCGTGGC CAATCACAGATGCCAAATGACCTGATTGACGGCCGGCGCCGGGGAGGGTTGCTGGGGGAAGTGGGAGGGGCCTCT	133	2	y	2.6e-05	+ ++++++ +++++
chr9:62122575-62123029	1	CAGCTCCAGCCTCTCGGCGAGGAAGCGCTCGTGTGAGGAGAGCCCGCCCGCTCGGCGCGCTACTGGGGAGCCGAG	41	2	n	7.5e-05	+++++++ +++
chr9:62122575-62123029	76	CCGCCGCCGTGCCCGCGGCTCTTCCCGCGAGATCCCAGCCACGGTAAGGGGCGAGGCCATGCCGGGGAGGAGAGG GCGGGACGGAGGCTCTTCGAATGGCAGCTCCGTCAGCCTGTTAGATTCGGTGTAGAAGGCGGGGTCACCAAGAGG AGGGGCCATATTAAGGGGAGGAGCTATGATGAGGGGGCGGAGAGTCCTCGAATGACAGTTCCAAAAAACCAATCA ACGGTGGCAGCGCAGAAGGCGGGACTCGCATTCTCCTGTGACCAATTGCAAAAGAGTAGAGCTAATTCTCCCCGC CTATCATCAATAAATTGCGGGCGAAGGTGTTGCTGACCCGATGTCAGTTTGCTACCTGGGCAGTTGCAGAGGTAC	119	2	y	2.1e-05	+ ++++++++ +++
chr9:62122575-62123029	76	CCGCCGCCGTGCCCGCGGCTCTTCCCGCGAGATCCCAGCCACGGTAAGGGGCGAGGCCATGCCGGGGAGGAGAGG GCGGGACGGAGGCTCTTCGAATGGCAGCTCCGTCAGCCTGTTAGATTCGGTGTAGAAGGCGGGGTCACCAAGAGG AGGGGCCATATTAAGGGGAGGAGCTATGATGAGGGGGCGGAGAGTCCTCGAATGACAGTTCCAAAAAACCAATCA ACGGTGGCAGCGCAGAAGGCGGGACTCGCATTCTCCTGTGACCAATTGCAAAAGAGTAGAGCTAATTCTCCCCGC CTATCATCAATAAATTGCGGGCGAAGGTGTTGCTGACCCGATGTCAGTTTGCTACCTGGGCAGTTGCAGAGGTAC	144	2	y	8e-08	++++ +++++++++
chr9:62122575-62123029	76	CCGCCGCCGTGCCCGCGGCTCTTCCCGCGAGATCCCAGCCACGGTAAGGGGCGAGGCCATGCCGGGGAGGAGAGG GCGGGACGGAGGCTCTTCGAATGGCAGCTCCGTCAGCCTGTTAGATTCGGTGTAGAAGGCGGGGTCACCAAGAGG AGGGGCCATATTAAGGGGAGGAGCTATGATGAGGGGGCGGAGAGTCCTCGAATGACAGTTCCAAAAAACCAATCA ACGGTGGCAGCGCAGAAGGCGGGACTCGCATTCTCCTGTGACCAATTGCAAAAGAGTAGAGCTAATTCTCCCCGC CTATCATCAATAAATTGCGGGCGAAGGTGTTGCTGACCCGATGTCAGTTTGCTACCTGGGCAGTTGCAGAGGTAC	202	2	y	5.9e-06	+ ++ ++++++++
chr9:62122575-62123029	76	CCGCCGCCGTGCCCGCGGCTCTTCCCGCGAGATCCCAGCCACGGTAAGGGGCGAGGCCATGCCGGGGAGGAGAGG GCGGGACGGAGGCTCTTCGAATGGCAGCTCCGTCAGCCTGTTAGATTCGGTGTAGAAGGCGGGGTCACCAAGAGG AGGGGCCATATTAAGGGGAGGAGCTATGATGAGGGGGCGGAGAGTCCTCGAATGACAGTTCCAAAAAACCAATCA ACGGTGGCAGCGCAGAAGGCGGGACTCGCATTCTCCTGTGACCAATTGCAAAAGAGTAGAGCTAATTCTCCCCGC CTATCATCAATAAATTGCGGGCGAAGGTGTTGCTGACCCGATGTCAGTTTGCTACCTGGGCAGTTGCAGAGGTAC	218	2	y	7.5e-05	++++++ +++++
chr9:62122575-62123029	76	CCGCCGCCGTGCCCGCGGCTCTTCCCGCGAGATCCCAGCCACGGTAAGGGGCGAGGCCATGCCGGGGAGGAGAGG GCGGGACGGAGGCTCTTCGAATGGCAGCTCCGTCAGCCTGTTAGATTCGGTGTAGAAGGCGGGGTCACCAAGAGG AGGGGCCATATTAAGGGGAGGAGCTATGATGAGGGGGCGGAGAGTCCTCGAATGACAGTTCCAAAAAACCAATCA ACGGTGGCAGCGCAGAAGGCGGGACTCGCATTCTCCTGTGACCAATTGCAAAAGAGTAGAGCTAATTCTCCCCGC CTATCATCAATAAATTGCGGGCGAAGGTGTTGCTGACCCGATGTCAGTTTGCTACCTGGGCAGTTGCAGAGGTAC	255	2	y	1.2e-05	++++++++++ +
chr9:62122575-62123029	76	CCGCCGCCGTGCCCGCGGCTCTTCCCGCGAGATCCCAGCCACGGTAAGGGGCGAGGCCATGCCGGGGAGGAGAGG GCGGGACGGAGGCTCTTCGAATGGCAGCTCCGTCAGCCTGTTAGATTCGGTGTAGAAGGCGGGGTCACCAAGAGG AGGGGCCATATTAAGGGGAGGAGCTATGATGAGGGGGCGGAGAGTCCTCGAATGACAGTTCCAAAAAACCAATCA ACGGTGGCAGCGCAGAAGGCGGGACTCGCATTCTCCTGTGACCAATTGCAAAAGAGTAGAGCTAATTCTCCCCGC CTATCATCAATAAATTGCGGGCGAAGGTGTTGCTGACCCGATGTCAGTTTGCTACCTGGGCAGTTGCAGAGGTAC	291	1	n	9.3e-06	+++++++++ ++
chr9:62122575-62123029	76	CCGCCGCCGTGCCCGCGGCTCTTCCCGCGAGATCCCAGCCACGGTAAGGGGCGAGGCCATGCCGGGGAGGAGAGG GCGGGACGGAGGCTCTTCGAATGGCAGCTCCGTCAGCCTGTTAGATTCGGTGTAGAAGGCGGGGTCACCAAGAGG AGGGGCCATATTAAGGGGAGGAGCTATGATGAGGGGGCGGAGAGTCCTCGAATGACAGTTCCAAAAAACCAATCA ACGGTGGCAGCGCAGAAGGCGGGACTCGCATTCTCCTGTGACCAATTGCAAAAGAGTAGAGCTAATTCTCCCCGC CTATCATCAATAAATTGCGGGCGAAGGTGTTGCTGACCCGATGTCAGTTTGCTACCTGGGCAGTTGCAGAGGTAC	312	2	y	1.2e-06	+ ++ +++++++++
chr9:62122575-62123029	76	CCGCCGCCGTGCCCGCGGCTCTTCCCGCGAGATCCCAGCCACGGTAAGGGGCGAGGCCATGCCGGGGAGGAGAGG GCGGGACGGAGGCTCTTCGAATGGCAGCTCCGTCAGCCTGTTAGATTCGGTGTAGAAGGCGGGGTCACCAAGAGG AGGGGCCATATTAAGGGGAGGAGCTATGATGAGGGGGCGGAGAGTCCTCGAATGACAGTTCCAAAAAACCAATCA ACGGTGGCAGCGCAGAAGGCGGGACTCGCATTCTCCTGTGACCAATTGCAAAAGAGTAGAGCTAATTCTCCCCGC CTATCATCAATAAATTGCGGGCGAAGGTGTTGCTGACCCGATGTCAGTTTGCTACCTGGGCAGTTGCAGAGGTAC	369	2	n	2.3e-05	+++++++++++
chr2:92008349-92008700	76	GCAGTTACGTGGCTTAATCGGCCTCTTGGGCCCCGCCCCTCCCAGGAATCCCGCTTGCCATTGGTGAGAGCAGAG	105	2	n	1.4e-08	++++++++++++++
chr2:92008349-92008700	76	GCAGTTACGTGGCTTAATCGGCCTCTTGGGCCCCGCCCCTCCCAGGAATCCCGCTTGCCATTGGTGAGAGCAGAG	129	1	y	8e-05	+++ + ++++++ +
chr2:92008349-92008700	151	AAGCTCCTGGCCAATGATAGGAGGCTGCGAGCCACCGCCCGCCTGACCAGGAACGCGGTTGCGCAGAGTAGGATC	158	1	n	1.6e-05	++++++++ + +++
chr6:54816477-54816974	1	TCTTCAGCGCTCACAGGCCACGTGCGGCAGGAGGGGCCGCCTTCTGATTGGTGGTGGGGGAGTCTCCTGGAGGGC GGAGCCACCGGTCTGTCCATCACCACATGCTGGGCGGGGCCTGGGCGGGTCGGCCTAGTTGTAGGGCAGAGCTAG	41	1	y	1e-05	++++++++++++ +
chr6:54816477-54816974	1	TCTTCAGCGCTCACAGGCCACGTGCGGCAGGAGGGGCCGCCTTCTGATTGGTGGTGGGGGAGTCTCCTGGAGGGC GGAGCCACCGGTCTGTCCATCACCACATGCTGGGCGGGGCCTGGGCGGGTCGGCCTAGTTGTAGGGCAGAGCTAG	67	2	y	4.2e-06	++ ++++++ ++
chr6:54816477-54816974	1	TCTTCAGCGCTCACAGGCCACGTGCGGCAGGAGGGGCCGCCTTCTGATTGGTGGTGGGGGAGTCTCCTGGAGGGC GGAGCCACCGGTCTGTCCATCACCACATGCTGGGCGGGGCCTGGGCGGGTCGGCCTAGTTGTAGGGCAGAGCTAG	86	3	n	5.6e-06	+ +++++ +++++
chr6:54816477-54816974	1	TCTTCAGCGCTCACAGGCCACGTGCGGCAGGAGGGGCCGCCTTCTGATTGGTGGTGGGGGAGTCTCCTGGAGGGC GGAGCCACCGGTCTGTCCATCACCACATGCTGGGCGGGGCCTGGGCGGGTCGGCCTAGTTGTAGGGCAGAGCTAG	102	2	y	1.4e-05	+ ++++++++++
chr6:54816477-54816974	301	CCGGGCGCCTCCCACTCTCCGAGCCGCCGGGGAGCCGGAGGATggcggcggtgacagcggccgcccgggaggagg cggtgcggaggccgcgaagcgcggcagcaagcggcagcggcccgtcgcggcggcccggcagcgaccgcgTCCGCA	368	2	y	2.3e-05	+++++++++++ ++
chr6:54816477-54816974	451	CGGCTACCTGAGCGGCAGCCGCGAGCTGCGTCCCGCctctctcgctt	457	3	y	0.0001	+ +++ + +++++
chr6:54816477-54816974	451	CGGCTACCTGAGCGGCAGCCGCGAGCTGCGTCCCGCctctctcgctt	480	2	n	1e-06	++++++++++++ +
chr5:123132410-123132857	1	AGAGCCCAGTAGAGCGACAGGGCAGGGGCGGGGTTACAGGGCAGGGCTACGAGGCTCCACCCACGGGCAGCTGGC	21	2	y	2.3e-06	++ ++++++++++
chr5:123132410-123132857	1	AGAGCCCAGTAGAGCGACAGGGCAGGGGCGGGGTTACAGGGCAGGGCTACGAGGCTCCACCCACGGGCAGCTGGC	54	2	n	4.9e-05	++ ++ +++++
chr5:123132410-123132857	151	GTATTTGTCTTGCAGTCCCAGGGGAAATGAAGAACCTGAAGAAATGGATGCTGAACCGCAAGCGCAGTGCACCCC CACCCCCTGCTTAGTAGATTCGTGGTTTCTGCCTCTTCACAGAGACAGCCTTTAGTTGGCAAGCTCCGCCTTCTA GCAAGGACCCTTTGATTGGCCGGTCCCACCCCCACAGAGAAAACGTTGATTGGCGGGCTGTATCCTAGCACCCGG	222	2	n	2.3e-05	++++ ++++++ +
chr5:123132410-123132857	151	GTATTTGTCTTGCAGTCCCAGGGGAAATGAAGAACCTGAAGAAATGGATGCTGAACCGCAAGCGCAGTGCACCCC CACCCCCTGCTTAGTAGATTCGTGGTTTCTGCCTCTTCACAGAGACAGCCTTTAGTTGGCAAGCTCCGCCTTCTA GCAAGGACCCTTTGATTGGCCGGTCCCACCCCCACAGAGAAAACGTTGATTGGCGGGCTGTATCCTAGCACCCGG	288	2	n	7.9e-06	++ ++++++ ++
chr5:123132410-123132857	151	GTATTTGTCTTGCAGTCCCAGGGGAAATGAAGAACCTGAAGAAATGGATGCTGAACCGCAAGCGCAGTGCACCCC CACCCCCTGCTTAGTAGATTCGTGGTTTCTGCCTCTTCACAGAGACAGCCTTTAGTTGGCAAGCTCCGCCTTCTA GCAAGGACCCTTTGATTGGCCGGTCCCACCCCCACAGAGAAAACGTTGATTGGCGGGCTGTATCCTAGCACCCGG	309	1	y	1.9e-06	+++ ++++++++++
chr5:123132410-123132857	151	GTATTTGTCTTGCAGTCCCAGGGGAAATGAAGAACCTGAAGAAATGGATGCTGAACCGCAAGCGCAGTGCACCCC CACCCCCTGCTTAGTAGATTCGTGGTTTCTGCCTCTTCACAGAGACAGCCTTTAGTTGGCAAGCTCCGCCTTCTA GCAAGGACCCTTTGATTGGCCGGTCCCACCCCCACAGAGAAAACGTTGATTGGCGGGCTGTATCCTAGCACCCGG	323	2	n	2.3e-05	+++++ +++++ +
chr5:123132410-123132857	151	GTATTTGTCTTGCAGTCCCAGGGGAAATGAAGAACCTGAAGAAATGGATGCTGAACCGCAAGCGCAGTGCACCCC CACCCCCTGCTTAGTAGATTCGTGGTTTCTGCCTCTTCACAGAGACAGCCTTTAGTTGGCAAGCTCCGCCTTCTA GCAAGGACCCTTTGATTGGCCGGTCCCACCCCCACAGAGAAAACGTTGATTGGCGGGCTGTATCCTAGCACCCGG	345	3	y	1.9e-05	+++++++ + +++
chr14:56885546-56886696	376	TCTCCTCCCGCCGCAGCCATGGCGGAGGTGGGACACCCTTCCCACGGGCCAGGCAAGGTGGAAGCGCCTGCACGG	396	2	y	1.5e-05	++ +++++ +++++
chr14:56885546-56886696	451	CCGCCAGCGCACCAGTCCCCTTGCGGCCGCAGCCGGGCTCGCCCCCTCGGTCCGCCGCAGGCACTGCCGGGCTCG	486	2	n	4.3e-05	+ + +++++++++
chr14:56885546-56886696	676	AAGACCGCCCGCCCCCAGGGCCGAAGCGCGAGCCGAACTGCGGGCAGCGCCACTCGGGCTCCTGACCCGGGCGGA	681	2	n	3.8e-05	+++++++++
chr14:56885546-56886696	751	CCCCGCGAGTGGGGGCGGGGCGGGGGCACggagggagggagggagggaaagagggagggagggagggccggccca	758	2	y	1.3e-07	+ +++++++++++
chr14:56885546-56886696	826	gcccgcgggggggggggggccggTAGGCCCGAGGGCGTGGCCCAGGTCTGACGGACAGCCGCCGTGACTACCTCA	853	2	y	8.4e-05	+ +++++ +++
chr14:56885546-56886696	826	gcccgcgggggggggggggccggTAGGCCCGAGGGCGTGGCCCAGGTCTGACGGACAGCCGCCGTGACTACCTCA	872	3	y	3.5e-06	++++ +++++++
chr14:56885546-56886696	901	CCGAGGAGGGTCCTGAAAGAAGGCCGACTGGGCCAATGGAGCCTGCCCGAGGCATTCCGTGCCGCCCACGCCATC AGCCAATGAGCGTGCGGAGGGCGGGGCCTCTCCGGGCCCCGCCGTGCCACCGCCTCCTCTGCCTCCTCCTCACCA	975	1	n	1e-05	++++++++ ++ +
chr14:56885546-56886696	901	CCGAGGAGGGTCCTGAAAGAAGGCCGACTGGGCCAATGGAGCCTGCCCGAGGCATTCCGTGCCGCCCACGCCATC AGCCAATGAGCGTGCGGAGGGCGGGGCCTCTCCGGGCCCCGCCGTGCCACCGCCTCCTCTGCCTCCTCCTCACCA	989	2	y	1.3e-07	+ ++ +++++++++
chr14:56885546-56886696	1051	GCGCTAAAGCCGGGACTGGACCGAGCGGAGTTGTGCGTGTCGCCGAAGGGGGGTGGGCCGGGGGAGGGGAGGTTC	1096	2	y	2.4e-05	++++++ +++ +
chr12:113014134-113014561	151	TGGGCGCCGGAGACGCCCTGGGGCGCGCGCCTCACTTCCGGTGGGCGGTGATTGGGTGCGCCGCGCGAGCCCTGC	195	1	y	9.1e-05	+ +++++++ ++
chr12:113014134-113014561	226	CCCGTCGACCAATAggcggcgcggtgcggcagggggcggggcgcgggcgcAGCCTGGACAccgcccgcgggcctg	231	1	n	3.3e-05	++++++++ ++ ++
chr12:113014134-113014561	226	CCCGTCGACCAATAggcggcgcggtgcggcagggggcggggcgcgggcgcAGCCTGGACAccgcccgcgggcctg	254	2	y	7.9e-09	+ ++++++++++++
chr12:113014134-113014561	301	ccggactcccgccgcccgccggcgccatgtgaccgcgccgccgccctccgcgcgcccggcccgcccgcccgccgc	358	2	n	3.1e-05	+ +++++++ +++
chr12:76710013-76710399	76	GGGACATTCCTGCCGGGGGACATCGCTGCTGCCGGGACCAGATAGTCCCGCGGCGGGGGCGGGGAGGCGGGGCTG	135	2	y	1.9e-07	+++++++++++++
chr12:76710013-76710399	151	CAGCCTCCCGCAGCGCCAGGCCCGCCTTCCCCACCCACTCCTGCACCTGCCAATCAGACTGCGCGCCCGGGGGCA	169	2	n	3.4e-06	+ +++++++ ++++
chr12:76710013-76710399	151	CAGCCTCCCGCAGCGCCAGGCCCGCCTTCCCCACCCACTCCTGCACCTGCCAATCAGACTGCGCGCCCGGGGGCA	195	3	n	5.6e-06	+++++ ++++++
chr9:21955635-21956245	1	CGTGTTTTGATCATTGGCTGACAGCTCCAGCGACGAACTTAGTCTGTGAACTATAGCCAATGAGGCCTCTGTGTG GGCGGGCCCAAGATGAGATATCGCTTTTGATTGGTCAGCGGCACTCAGCAAATGGCGGAGGCGCTGAGGCGGGTG	7	1	y	1.9e-05	+ + ++++++++
chr9:21955635-21956245	1	CGTGTTTTGATCATTGGCTGACAGCTCCAGCGACGAACTTAGTCTGTGAACTATAGCCAATGAGGCCTCTGTGTG GGCGGGCCCAAGATGAGATATCGCTTTTGATTGGTCAGCGGCACTCAGCAAATGGCGGAGGCGCTGAGGCGGGTG	70	2	y	1.3e-05	+ +++++++++ +
chr9:21955635-21956245	1	CGTGTTTTGATCATTGGCTGACAGCTCCAGCGACGAACTTAGTCTGTGAACTATAGCCAATGAGGCCTCTGTGTG GGCGGGCCCAAGATGAGATATCGCTTTTGATTGGTCAGCGGCACTCAGCAAATGGCGGAGGCGCTGAGGCGGGTG	99	1	y	9.3e-07	+++ ++++++++++
chr9:21955635-21956245	376	GGAGGGCTGGACCTGGCAATGCGTTACCCAATGGCGGGCTAGTTCGCGCCTGAGTGACAGTTCGATAGGCAAATG	424	3	y	4.5e-06	+ +++ ++++++ +
chr9:21955635-21956245	451	GCAGCGTGAATCGTAGATTCACAACTAAATCGTCATAAAGCGTCTGTGGAAGTGGTGGGTGGAAGAGGCGGAGTA	511	2	y	7.9e-06	+++++++++++ +
chr5:120612582-120613546	1	TGCGCACTGGTACGTCCCTATACCCCGCCCTCGCGCTGATGGTACGTTCCACAGGCCACACCCCCAGCCTCATCT	22	2	n	5.9e-06	++++++++ + +
chr5:120612582-120613546	76	GTACATCCATTAGGCCCCGCCCCTTGGTAGGGTCAACCTTGCGTGGTTGGTACATTCCTCGAGTTTGTCCACACG	89	2	n	1.5e-07	++++++++++++
chr5:120612582-120613546	151	TTCAGTTGTTATGTCCCTCAGGTCCTGCTCTCTTTACAGTTACCACATCTCTCACAGCTTGGCATTCGCGCAGTT	159	3	n	9.4e-05	++++ +++ +
chr5:120612582-120613546	226	AGTAGGTCCCTTAAGCATCTATCACGGTTCAGTTGACACATTCCGCCCCCACCAGTTGGTATGTCCCTCAGGCCT CGCCTCTGCCCGGCTGGTACACCACTTAGGCCCCGCCCCCGTTCTGTTGGTTCCTCCTTCTGGCTTCGCCCATTG	265	2	n	7.9e-06	+ ++++++++ ++
chr5:120612582-120613546	226	AGTAGGTCCCTTAAGCATCTATCACGGTTCAGTTGACACATTCCGCCCCCACCAGTTGGTATGTCCCTCAGGCCT CGCCTCTGCCCGGCTGGTACACCACTTAGGCCCCGCCCCCGTTCTGTTGGTTCCTCCTTCTGGCTTCGCCCATTG	297	2	n	4.9e-05	+++ +++++++ ++
chr5:120612582-120613546	226	AGTAGGTCCCTTAAGCATCTATCACGGTTCAGTTGACACATTCCGCCCCCACCAGTTGGTATGTCCCTCAGGCCT CGCCTCTGCCCGGCTGGTACACCACTTAGGCCCCGCCCCCGTTCTGTTGGTTCCTCCTTCTGGCTTCGCCCATTG	330	2	n	6.6e-07	+++++++++++
chr5:120612582-120613546	376	ATAAAGCCATGTTGACGCTCCGCCCCTGCGAAGTTGGTTGGTTTCCTCAGGCCCGGCCCCGCCCTACGGGTGAAA	392	2	n	3.4e-06	++ ++++++++ +
chr5:120612582-120613546	376	ATAAAGCCATGTTGACGCTCCGCCCCTGCGAAGTTGGTTGGTTTCCTCAGGCCCGGCCCCGCCCTACGGGTGAAA	431	2	n	5.9e-06	+++++++++ +
chr5:120612582-120613546	451	CCTGGATTCTCGACGCCGCTCTTGCGTCTCACAGGCTCCGCCCCCGCGCAGTCGACGCGTCCCTTAGGCCCCGCC CTCTTCCGGGTCTAAGAGCCCGGCCCGCATGGCTGCTGGCAGACGTGTGGGACCTGGCCCGCCGTCGCGTCCCAC	485	2	n	1.8e-06	++ ++++++++ +
chr5:120612582-120613546	451	CCTGGATTCTCGACGCCGCTCTTGCGTCTCACAGGCTCCGCCCCCGCGCAGTCGACGCGTCCCTTAGGCCCCGCC CTCTTCCGGGTCTAAGAGCCCGGCCCGCATGGCTGCTGGCAGACGTGTGGGACCTGGCCCGCCGTCGCGTCCCAC	518	2	n	3.5e-08	+++++++++ ++ +
chr5:120612582-120613546	751	CGGGCTCTCGGCCTGCGCCCTTCCGCTTGTCCGTCTCACTAATCGCGGTCCCTCATTGGGTCCCTTCGCGTGGGG	775	3	n	0.0001	++ ++++ +++ +
chr5:120612582-120613546	826	GACGGGCTCGAGTTTACGCAGCCAATAGAAAGTGCAAGTGCGGAAGGTCCGCCTGAGTTTGGGGCGGTCTTAGAT	844	1	n	4.8e-06	++++++++ + +++
chr5:110058042-110058347	1	TAAGGCACCCGGAAAAACCCGCCTTCCCCTCTGACTGGCAGGTGCGCCTAAAAGGCTCTGATTGGCCAGTAAGTC	16	2	n	3.8e-05	+++++++ ++++
chr5:110058042-110058347	1	TAAGGCACCCGGAAAAACCCGCCTTCCCCTCTGACTGGCAGGTGCGCCTAAAAGGCTCTGATTGGCCAGTAAGTC	30	3	y	8.4e-06	++++++ +++++
chr5:110058042-110058347	1	TAAGGCACCCGGAAAAACCCGCCTTCCCCTCTGACTGGCAGGTGCGCCTAAAAGGCTCTGATTGGCCAGTAAGTC	55	1	y	9.3e-07	+++++++++++++
chrX:140956679-140957032	1	AGACCTCCGTGAAACTCAAGCCCCGCCCACTCGCATTTCCTGTTCCGGCGACCAATCAAAGTACTAGAAATTCTC	20	2	n	4.9e-08	+++++++++++++
chrX:140956679-140957032	1	AGACCTCCGTGAAACTCAAGCCCCGCCCACTCGCATTTCCTGTTCCGGCGACCAATCAAAGTACTAGAAATTCTC	49	1	n	5.6e-06	++++++++++ ++
chrX:140956679-140957032	76	CAATCACTGATCTTTGTTTTCCTTGTAGCCCCGCCCATAGCCTGGAGCTTCTGGGAGTTGCAGTTTGAAAGCAGA	103	2	n	5.6e-07	+++++++++++ +
chr8:84104526-84105208	226	CACCCCCTCCCTCCACTTCCGGAGCAACCGGTCCCTTAGCCCCGCCCCTGGCACTTTCTGATTGGCCTTTTCTCC	264	2	n	4.8e-07	+++++++++++ +
chr8:84104526-84105208	226	CACCCCCTCCCTCCACTTCCGGAGCAACCGGTCCCTTAGCCCCGCCCCTGGCACTTTCTGATTGGCCTTTTCTCC	280	1	y	3.3e-06	++++++++++++
chr8:84104526-84105208	301	TTACTGCGGCCGGCCGGTTGGGTGACAGCCGGCATTCCTTGTCGCTTCCCGCTACGCTTGTCCATCAAAGCTATC	356	3	n	1.6e-05	++ ++++ +++++
chr8:84104526-84105208	376	TTGGTTTTTGGTTGGTAAAGATGGTAACAGCTCCCGCCTTATTCCCGCCCTTCATTAAAGATAAACCACTCAGAA	417	2	n	2.1e-05	++++++++ ++
chr8:84104526-84105208	526	CCCCTGAGTGGGTTTCCGTGGAAACCACTGGCCGTCCAGCGGCCTGTGGGCGGGGCTATGGGAACCTGTGGTCCA	568	2	y	6.6e-07	+++++++++++
chr9:106280957-106281535	1	TAAGCCTGTCACTCATAATGGTAAAACTCCGCCCGCCCCGGAGCATCTCGGTAAATGTAGTTCTACCTTTATTAA	4	3	n	1.1e-06	++++++++ +++
chr9:106280957-106281535	1	TAAGCCTGTCACTCATAATGGTAAAACTCCGCCCGCCCCGGAGCATCTCGGTAAATGTAGTTCTACCTTTATTAA	26	2	n	4.9e-05	+ ++++++ ++++
chr9:106280957-106281535	301	CGGTCGGCGGACAAAAACCTAGGGCGCTTCTCCTTTAATTGCGGTGGGCGGGACGCGGCGACGCCACCGGCGTTG	341	2	y	4e-07	+ ++++++++++++
chr2:156196538-156197195	1	CGTCACGGGTGAGTGCGGACTCGGCGTTCCCGCTTCAGGGAGGTGGGCGTGGCTTGCTCGCGCTGTCGTCCTGGC	40	2	y	2.6e-05	+ ++++++++ +++
chr2:156196538-156197195	76	GACCGGGAggggcggggcccggggcggggcTGTAGGGAGGCTGCGTCACTCGGCGGTGGAGATGGTGCGTGTGTG TGGGGGGCGGGGGATACGCTGGGCGCGTCCCCGGGGTCACGTGGTGCGCAGCGCGCACAGTCCTTCTGTCGGTTG	80	2	y	1.4e-08	++++++++++++++
chr2:156196538-156197195	76	GACCGGGAggggcggggcccggggcggggcTGTAGGGAGGCTGCGTCACTCGGCGGTGGAGATGGTGCGTGTGTG TGGGGGGCGGGGGATACGCTGGGCGCGTCCCCGGGGTCACGTGGTGCGCAGCGCGCACAGTCCTTCTGTCGGTTG	150	2	y	4.2e-06	+ +++++++++++
chr2:156196538-156197195	301	TGGGGCCGTGTTGGGGGCAGGCCCCGTGCCGCGCGCGCGCTGTGCGGGCGGGACCGGGGACGGACGCCCCGGCCA	341	2	y	4.6e-05	+ + +++++++++
chr2:156196538-156197195	451	GCTGCTGAGAGCGTGGCGGGCGTGCGAGCGTCGCCCAATCACTGCGGCTACCCGCGGGAATGACGGCCGCTCAGG CCAATCAGCGGGGCCCGAGGGGGCTGGGCCGCGAGGTGCGGGCCCGGGGCGCGGAACGGGGCAGTGGGGGTGGGG ATGGGTGCTGAGGCTGCACCCCCTGCTTAGTCCGCGAGATAGGGGGAGGCCTAAGCT	523	1	n	1.4e-05	++++++++++ ++
chr2:156196538-156197195	451	GCTGCTGAGAGCGTGGCGGGCGTGCGAGCGTCGCCCAATCACTGCGGCTACCCGCGGGAATGACGGCCGCTCAGG CCAATCAGCGGGGCCCGAGGGGGCTGGGCCGCGAGGTGCGGGCCCGGGGCGCGGAACGGGGCAGTGGGGGTGGGG ATGGGTGCTGAGGCTGCACCCCCTGCTTAGTCCGCGAGATAGGGGGAGGCCTAAGCT	588	2	y	2.1e-05	+ +++++ ++++
chr11:23770761-23771563	1	gtcagtgagtcagtcagccaggcagtcggtcaggcaggcagtcagccagctagcccgtcagtcagccaaccagtG	53	3	n	5.6e-06	+++ ++++++++
chr11:23770761-23771563	226	CCAGGATGCCGCGGCAGGGGCAGGGGGCGGGGCGGACCGCCCGGCGGAACGTGGGGGGAGGGGGGGGGATTTCCC	245	2	y	7.9e-09	+ ++++++++++++
chr11:23770761-23771563	301	GCTGCTTACGTCACTCGCGCCACCGCCTAcccggggcggggggcggagcctcgcggcgggcgcgcgaccccgcgc	336	2	y	4.8e-07	+ +++++++++ ++
chr11:23770761-23771563	526	AAGCCGAGGGGCGTGTTCGTGACGTCATGCTGGCCGAGCGGCCGGAGGCGGGCCGGGCGGTGCACCGGGCGCGCT	566	2	y	7.9e-06	+ +++++++++ +
chr11:23770761-23771563	601	CCTTGGCCGCCCGAGGCCCGCCCGGGGTTTTCGACCGGTGGTTCCCCCTCTTCCCGATTTCGCACATGCAAATCT CCGCCCCCGCGCCAGAGAGTTGTCCGGGTGCTCTGGAGGGGAAGTGCGGAAGCGCCAGCGCCCGCGTTCGGCAGT	673	2	n	1.1e-05	+ ++++++++ +
chr4:3938527-3939038	1	tggcccccgcccGCCGAGGTGCCCGCCCTCCTCACGCTCCGCCCAGGGCCTGGCCAGTCCGAGCGGCCGCCGCCG	20	2	n	1.1e-05	+++++++ ++ +
chr4:3938527-3939038	1	tggcccccgcccGCCGAGGTGCCCGCCCTCCTCACGCTCCGCCCAGGGCCTGGCCAGTCCGAGCGGCCGCCGCCG	36	2	n	3.3e-05	++ +++++++ +
chr4:3938527-3939038	76	GGTCCAGATGAGCTCATTGGTTGACGTGGCTGCCCATCAGGCCGAAGTGGTAAGAGCGATGCTGAAGGGCGGGGG	85	1	y	2.3e-05	++ ++++++++
chr4:3938527-3939038	76	GGTCCAGATGAGCTCATTGGTTGACGTGGCTGCCCATCAGGCCGAAGTGGTAAGAGCGATGCTGAAGGGCGGGGG	103	3	n	1.3e-05	+++++ + ++++ +
chr4:3938527-3939038	76	GGTCCAGATGAGCTCATTGGTTGACGTGGCTGCCCATCAGGCCGAAGTGGTAAGAGCGATGCTGAAGGGCGGGGG	137	2	y	2.3e-05	++ ++++++++
chr4:3938527-3939038	151	GCGCGGTGGGGCGGGGAGAAGGCGGGGTCTCACGCCGTCCCACCCGCTCCTCCTGCTTGAGCCCTCCTCCCGCTG	165	2	y	2e-06	++++ ++++++++
chr4:3938527-3939038	151	GCGCGGTGGGGCGGGGAGAAGGCGGGGTCTCACGCCGTCCCACCCGCTCCTCCTGCTTGAGCCCTCCTCCCGCTG	187	2	n	4e-05	+++++ +++ ++++
chr4:3938527-3939038	226	CCCGGGGGCGGAGCGAACTGAGCCCGCCCCAACCTCACAGAGTTCCGCGCGCCTGTCAATCTGGCAGCGGCGTGC	226	2	y	3.8e-06	++++++++ ++
chr4:3938527-3939038	226	CCCGGGGGCGGAGCGAACTGAGCCCGCCCCAACCTCACAGAGTTCCGCGCGCCTGTCAATCTGGCAGCGGCGTGC	246	2	n	3.3e-05	++++++++ ++
chr4:3938527-3939038	226	CCCGGGGGCGGAGCGAACTGAGCCCGCCCCAACCTCACAGAGTTCCGCGCGCCTGTCAATCTGGCAGCGGCGTGC	276	3	n	1.3e-06	+++++++++++ +
chr4:3938527-3939038	376	GAGCCACTGACGTGTTTGGAACTGCAGCCGGCCCGGGTGCTGGCTGAGTGGTGGCCTGTGGTGAGTGGTCTCCGG CCCCTCCCTCCCTGGACAGCAGGCCCGGGACAGCACTGCGCCGAGGGCAGACCCTAGTTCG	450	2	n	4.9e-05	+++++ +++ +++
chr8:91133948-91134451	1	AACAGCATCTCCGGCTGTCCTGCAGCCCGGCCCCTGCCGCTCCTCTCCCGCAGAGCCCCGCCCCGCCCTGCCCTC	55	2	n	9e-07	++++++++++ +++
chr8:91133948-91134451	76	AGCGGGACACGCCCTGGACACGCCCTAGACTGGGCGCTTCCGCTCGGATACCCATGCCGAATGGCTCTCTCTCGC CGTCCATCAAAAACGTACTTCCGGGAGGTGTTGGGGCTTGGAGCTCCGTCCTGCCAATCAAGTTAGCGCCGCTCG	148	3	n	4.2e-05	++ +++ +++++
chr8:91133948-91134451	76	AGCGGGACACGCCCTGGACACGCCCTAGACTGGGCGCTTCCGCTCGGATACCCATGCCGAATGGCTCTCTCTCGC CGTCCATCAAAAACGTACTTCCGGGAGGTGTTGGGGCTTGGAGCTCCGTCCTGCCAATCAAGTTAGCGCCGCTCG	199	3	n	3.5e-06	++++ ++++++++
chr8:91133948-91134451	226	GGTGGGGCCGCGCTCGTACCTCCCCCTTACGTAACAGCGCCCAGGGACGAGCTGTCAGTCAAAGAAGCTTCAATC	275	3	n	3e-07	+++++++++++++
chr8:91133948-91134451	301	CCTGGGGAGGCTGGGACGAGAAACAAACAGGCACCAGGCCGCCATTGGACGTGGCGTGTGTCAGTCACCATGGAT	356	3	n	3.3e-05	+ ++++++++++
chr9:22307645-22307959	1	CCAAGATGGTGGTATGCTGTCACGTCAGAGACAAAGGCCGGACCGCCAAAGCCCGCCCCCTTCCCTTTGTCTATG	50	2	n	4.2e-06	++++++++++ +
chr9:22307645-22307959	76	CGCCCGATTGCGCGTTTCTCACCCCGGCGCCTTCGATTGGACAGGGTTTCAGTTCTCATCCGGCTCAGACCTGAC TGACAGAAGCTGGCACCAATCCATGAGTGCATAAAGCAAGCCAACTTTATTCCCACCGTTTAAAAATGACAACTT	105	1	y	2.8e-05	+++ +++++++ ++
chr9:22307645-22307959	76	CGCCCGATTGCGCGTTTCTCACCCCGGCGCCTTCGATTGGACAGGGTTTCAGTTCTCATCCGGCTCAGACCTGAC TGACAGAAGCTGGCACCAATCCATGAGTGCATAAAGCAAGCCAACTTTATTCCCACCGTTTAAAAATGACAACTT	145	3	y	2.4e-06	+ ++++++++++
chr5:125465714-125466065	1	GGGCTCCGCCCCTCTGCCTAATTCTTATTGGGCACGCCCTTACCGGGGTCCCCTTCAGGATTGGCTGAGAGATGC	3	2	n	1.8e-06	++ +++++++++
chr5:125465714-125466065	1	GGGCTCCGCCCCTCTGCCTAATTCTTATTGGGCACGCCCTTACCGGGGTCCCCTTCAGGATTGGCTGAGAGATGC	21	1	y	9.1e-05	++++ +++++ ++
chr5:125465714-125466065	76	AGCCCACGCGCAGGAATGGCATGTGATTGGTTGTCATTCAGGCCGGTTCTTCCCGGGGCCGCGATCTGGGCTGAT	95	1	y	5.6e-06	+ + ++++++++++
chr5:125465714-125466065	151	GTGGGGCCAGTCCCGCACCAGCCAATCAACGCGCCAATCGCGTGTGGCGCGTGCCTATGCTCAGAATCCCTCCGC	169	1	n	3.7e-06	++++++++++ +
chr5:125465714-125466065	226	CGGGATGCGGCAGGGGCGTGGCTACTTCAGTCCGGAAAGAAGTTCCTTGGGGCTGGTGCAGAGCCTTAGGTCCGC	234	2	y	3.5e-05	++ +++++++ +++
chr5:135168386-135169053	151	CGTAGCCGGGCTAAAGATGACATCAAGAAGGTGATGGCGGCCATCGAGAAAGTGCGGAAATGGTGAGGGGCGGGA GCGGAGGGGTTGCTGACGTGGGGTTGCGGGAAAGCCGGCGCGGAGGCTCGCCATACAGGAACAGGCAGGATGGGA	213	2	y	1.4e-05	+ +++++++++++
chr5:135168386-135169053	376	TCAGAGTCCGCGTTCCCTGTAGCCAATCAGAAAGACGGTCGGCTCATGGCCCCTCCCATAGCTGTCATTAGCCGC	395	1	n	3.7e-08	+++++++++++++
chr5:135168386-135169053	376	TCAGAGTCCGCGTTCCCTGTAGCCAATCAGAAAGACGGTCGGCTCATGGCCCCTCCCATAGCTGTCATTAGCCGC	424	2	n	6.7e-05	+++++ +++++ +
chr5:135168386-135169053	451	TTCCGGCCGCTCTGCCTGGGGCGGGGCCTGGCGCTGCACAGTTGCACTTCCGGTGGAGACCTCGCGGAAATGCTG	464	2	y	3.8e-06	+ ++++++++++
chr8:69395511-69395641	1	TACACCACTTCAGAAAAGAGCCGAGAGCACGGCGCCCGGAAGAGCCCGCCTCACCTTCTGAGTGGCAGTCCGCCT	43	2	n	7.9e-05	++++++++ ++
chr8:69395511-69395641	1	TACACCACTTCAGAAAAGAGCCGAGAGCACGGCGCCCGGAAGAGCCCGCCTCACCTTCTGAGTGGCAGTCCGCCT	57	3	y	3.9e-05	+++ ++ +++ +
chr8:69395511-69395641	76	GGAGGTCCTGATTGGCTAGAGACGCTTGAGTGACAAGAGCCAGAGAATACTGGAG	80	1	y	5.6e-06	+ +++++++++++
chr8:69395511-69395641	76	GGAGGTCCTGATTGGCTAGAGACGCTTGAGTGACAAGAGCCAGAGAATACTGGAG	100	3	y	1.1e-05	+++++ +++++ +
chr17:25919762-25920671	1	CACCCTCCGCCGGCCCTCTCCGGGCCATTGGCCTGGCAGCCTGGCCGTCACGGTCGCCCCGCCCCCACGTCGCCC	56	2	n	6.4e-08	+++++++++++ +
chr17:25919762-25920671	76	CACACAAGGTGCCGCCCAGCCCACGGTCGCCCCGCCCTGCCCACTCGCCACTGCTACTGGCCCGCTGCCACCCTC	104	2	n	2.3e-06	+++++++++ +++
chr17:25919762-25920671	151	TTTCTCACTTCTGTTGGTCTACATGCTTGTCTATCACTGAAGTCCCGTCCCCGCTATTTCGTACACAGTGTTGCT	175	3	n	3.9e-05	++ ++++ +++++
chr17:25919762-25920671	226	GAGGCTGGCGTTTTTCCCCGCCTCCTCGCTGTGACCATTGGCTACTTCCCACTGATTTTCCGAAATCATTGGTTG	240	2	n	1.6e-06	++++++++++++
chr17:25919762-25920671	226	GAGGCTGGCGTTTTTCCCCGCCTCCTCGCTGTGACCATTGGCTACTTCCCACTGATTTTCCGAAATCATTGGTTG	256	1	y	3.9e-05	+ + ++++++++
chr17:25919762-25920671	376	CAACATCCTGGCCTCCCGCCCCCTCGTCATCACCATTGGCTACTACTGCTAAGGCATTTGTGCCATCTAACATCG	388	2	n	4.7e-06	++++++++++++
chr17:25919762-25920671	451	ATCATAACCTCCTAGGCCCACCCCTTTCCTAATTCGGGCCAATCAAGAGTCAAACATTACACAAGTCTACCCTTC	465	2	n	1.4e-05	+ +++ ++++++ +
chr17:25919762-25920671	451	ATCATAACCTCCTAGGCCCACCCCTTTCCTAATTCGGGCCAATCAAGAGTCAAACATTACACAAGTCTACCCTTC	486	1	n	4.6e-05	+++++++++ ++
chr17:25919762-25920671	676	ACACTGTGGGGCTCGCCTTCCCTGAGGGCAGGGCGGGGACAGCCACTTAGTGTTCGCCCTGGAGGGGCAAGCCTC	701	2	y	1.3e-05	+++ ++++++++
chr17:25919762-25920671	751	TCTCCCTTGTGGGCTGTTCCAAGGGGTGGGACTTCCTCCTGGCTGCGGAGTGGGCGGGGCCGCTACTGAGTGTTT	769	2	y	1.1e-05	++++++ +++++
chr17:25919762-25920671	751	TCTCCCTTGTGGGCTGTTCCAAGGGGTGGGACTTCCTCCTGGCTGCGGAGTGGGCGGGGCCGCTACTGAGTGTTT	797	2	y	7.9e-09	++++++++++++++
chr17:33759861-33760812	1	AACACCAGCTACAATCCTGCTTTCAACGCAGTCCGCCCGCCAAACCCAGGAAAGCCCCGCCCCTCGGGACGCCCC GCCCCAACGGCCTCTCCTACCACCTCGGGCCCCACCCCCCCAAggccccggccccgccccggcgcATCCGGGGTC	54	2	n	2.8e-07	++++++++++++
chr17:33759861-33760812	1	AACACCAGCTACAATCCTGCTTTCAACGCAGTCCGCCCGCCAAACCCAGGAAAGCCCCGCCCCTCGGGACGCCCC GCCCCAACGGCCTCTCCTACCACCTCGGGCCCCACCCCCCCAAggccccggccccgccccggcgcATCCGGGGTC	71	2	n	2e-06	++++++++++ +
chr17:33759861-33760812	1	AACACCAGCTACAATCCTGCTTTCAACGCAGTCCGCCCGCCAAACCCAGGAAAGCCCCGCCCCTCGGGACGCCCC GCCCCAACGGCCTCTCCTACCACCTCGGGCCCCACCCCCCCAAggccccggccccgccccggcgcATCCGGGGTC	104	2	n	8.8e-06	+++++ +++++++
chr17:33759861-33760812	1	AACACCAGCTACAATCCTGCTTTCAACGCAGTCCGCCCGCCAAACCCAGGAAAGCCCCGCCCCTCGGGACGCCCC GCCCCAACGGCCTCTCCTACCACCTCGGGCCCCACCCCCCCAAggccccggccccgccccggcgcATCCGGGGTC	126	2	n	5.9e-06	++++++++++ +
chr17:33759861-33760812	451	CACCCGTCGGGGGCGGAACCGGCGCCGCGTAGAGCGGCGGTCTAAAGGCCAGTCAACGGTGAAAGCGGTAGTGAC	456	2	y	5.9e-06	+ ++++++++ ++
chr17:33759861-33760812	601	CCCTCGGTCTCCCGGAGAAAGGCGGAAGGAATGCGGACCTTTTTGAAATGACAGATTCAGCAGCCTATCAAAAGC	615	2	y	7.9e-05	+ ++ ++++++ +
chr17:33759861-33760812	601	CCCTCGGTCTCCCGGAGAAAGGCGGAAGGAATGCGGACCTTTTTGAAATGACAGATTCAGCAGCCTATCAAAAGC	661	1	n	8.6e-05	+++++ ++++ +++
chr17:33759861-33760812	676	AGATGGGGGAAGGCGGGACGGAACACTTGAACAATGAAGTGGATTGACAGAGTGCGTAACCAATGAGAGACTGAA	681	2	y	7.6e-07	++++ +++++++++
chr17:33759861-33760812	676	AGATGGGGGAAGGCGGGACGGAACACTTGAACAATGAAGTGGATTGACAGAGTGCGTAACCAATGAGAGACTGAA	714	3	y	4.8e-05	+ +++++++++
chr17:33759861-33760812	676	AGATGGGGGAAGGCGGGACGGAACACTTGAACAATGAAGTGGATTGACAGAGTGCGTAACCAATGAGAGACTGAA	732	1	n	7.6e-07	++++++++ ++++
chr5:93267054-93268314	1	AATCCAGACCCCAGAGTTGCTAAGGCCCCGGAAGAAGATAAGAGAGTCGGGATATATTGAGAGCCAATCAGAGGA	61	1	n	6.6e-07	+++++++++++++
chr5:93267054-93268314	76	CGCAACAGCCAGTCGGCCAGCCAATCCAGATTCGAGATTAAATCAAGTCCTCAGCAGTCGGCTTGCCCCACCCTT GTCCAATCAGGGAGCCCGCTACTTTGGGCGGACTTTTCAAAACAGCGAAAACAAAACAAATCGGGGGACCTTTAA	140	2	n	1.5e-05	+++++ +++ + +
chr5:93267054-93268314	451	GGATCCCTCCGCGCGCAGTCACGCGCCCCGCCCCTTGGGGGCGTCGCAGACTCAAAACAAAAACAAGGGGTTTGC	475	2	n	1.5e-07	++++++++++++
chr5:93267054-93268314	826	CGCAGCTGAGGGACTGACAGGGGCTCCAGGGTGTTCTGAGGCTATACGGTGGGTTGACAGCCCCGGGGCTTCGCA	834	3	y	4.5e-05	+ ++++++++++
chr5:93267054-93268314	1051	TGGGCTCCGCGACGGGCTCCCGGGGCGGGGCTCCGAAGCCGCCTCCTTCCAGTTCTTTGTTCAGTCTCGAGACTC	1068	2	y	3.1e-05	++++++++++
chr5:93267054-93268314	1126	CCCCTCCCTTCTCTCCTATTGTGCAACGCCCCGCCCCAGAACCCGCTTCGGTGGCTTCAGTCTTCCGGTCCCCCG	1153	2	n	2.8e-05	++++++++++
chr6:134640871-134641244	1	AAGGCAGCGCCGCCCCAGCCTCCAGCGCGCGTCTCTTGCCCCGCCCCACCCCTCGGGTTTGGAGGCGGGACCTCC	38	2	n	4.8e-07	++++++++++ +++
chr6:134640871-134641244	1	AAGGCAGCGCCGCCCCAGCCTCCAGCGCGCGTCTCTTGCCCCGCCCCACCCCTCGGGTTTGGAGGCGGGACCTCC	58	2	y	1.4e-05	+++++++++++
chr6:134640871-134641244	76	AAACCCGGAACTGAAGGCCGCGCATTGCCGGCCCGGCCAATCGGCGTCCCGGAAGGAGCGAGCTGAAGCCACCGA	109	1	n	2.8e-05	+++++++++++ +
chr6:134640871-134641244	151	GCCAGTGAATGACAGCAGCGCCGCCCGCCGGTCGCGGCTGCAGCCCTGCCGGCGTCCCGAGCCTCCTGTCAACGC	154	3	y	1.3e-05	++++ +++++++
chr5:138441372-138441642	1	TGAACTGTCACTCAGGGTGGACCTGAAGCGCTACCCTATCAGACACAATAGACTGAAGGCTACCCAATCAGACAC	3	3	n	4.5e-06	+ ++++++ +++ +
chr5:138441372-138441642	76	ACGGTCGGAAGGGAGGAGGCGGGCCTTGCGTACGTTGTTGCTGACCCCGCCATCTTGGCATCTGTGGCCGCTTTC	87	2	y	9e-07	++++++++++++ +
chr5:138441372-138441642	151	TTCTCCCAGCTCTGTGTTCTGGATTGCACCTAGTGTCTGTCGCCGTGTGACTCGCTGGTACCTGGACACCCAGCG CGAGGCGGGGCGCTCACCTGAGTCCCGAAATGGTGCGTTTACCCA	223	2	y	5.9e-06	+ + ++++++++++
chr17:49029970-49030256	1	TGGGAAGGGGTGGAACTGGCAGGGACTTGGCATGGGAAGGTGCGGAGTTTTGATTGACAGGAATGGGCCAGCAAA	3	2	y	1.3e-05	++++++++ ++ ++
chr17:49029970-49030256	1	TGGGAAGGGGTGGAACTGGCAGGGACTTGGCATGGGAAGGTGCGGAGTTTTGATTGACAGGAATGGGCCAGCAAA	49	3	y	4.2e-07	++++++++++++
chr17:49029970-49030256	76	TGGAGCTGTGCTGGGTGGGGCCTGCAAGGGGAGTGGCGAGTGGTGGGTGGGGCCTGGGTAGGGACGGAAGTTCCA	83	2	y	4.3e-05	+ + ++++ +++++
chr17:49029970-49030256	76	TGGAGCTGTGCTGGGTGGGGCCTGCAAGGGGAGTGGCGAGTGGTGGGTGGGGCCTGGGTAGGGACGGAAGTTCCA	115	2	y	5.9e-06	+ ++++++ +++++
chr17:49029970-49030256	151	GTGAGGCCTCACAGGGGTAGAGTTGGATGGGCACAGCCGGGGGTGGGTGGAGCCTGAGCAAGGTGGAAGGTGGGC	190	2	y	9.6e-06	++++++++ ++ ++
chr6:83867020-83867470	1	CCGCCCCCAGATTCCCGCGCTCGTCTCCTATTGGCTGGCTTGTTGGTGGGCGGAACCCTGCACGGAGCTCAACGC	24	1	y	4.8e-06	++++ ++++++++
chr6:83867020-83867470	1	CCGCCCCCAGATTCCCGCGCTCGTCTCCTATTGGCTGGCTTGTTGGTGGGCGGAACCCTGCACGGAGCTCAACGC	43	2	y	2.4e-05	+++++++++ ++
chr6:83867020-83867470	76	CTGGGGACCCGGCAGAAGCGAATTGAGGTGAGGGAGGAGCTCAGAGCTGTGCAGGTCGGCGATGCCCGGGGCTGG	102	2	y	8.4e-05	++ + +++ ++ ++
chr6:83867020-83867470	226	AGCGCTTCCCTTGTCCGCGGTGCCCCTGGTCGCCTGCTCTGGGGCTTCAGGGGGCGGGCCTCCAGGTCCCCCGTG ACTGTCAGTCACTCCCTGGCTGCTGCGCTCGTTGAGCTCTGGGCGAGTGGGAGGTGGCTGGGTGTCAGTTAAAGG	272	2	y	6.5e-06	++++++++++ +
chr6:83867020-83867470	226	AGCGCTTCCCTTGTCCGCGGTGCCCCTGGTCGCCTGCTCTGGGGCTTCAGGGGGCGGGCCTCCAGGTCCCCCGTG ACTGTCAGTCACTCCCTGGCTGCTGCGCTCGTTGAGCTCTGGGCGAGTGGGAGGTGGCTGGGTGTCAGTTAAAGG	300	3	n	3.1e-06	+ +++++++++++
chr19:29361808-29362113	76	CAGAGCCCCAGGATTGGTTGGCTATGACAGTGGATCACGAGCTTCAACCAATCAGCGTGGCCTTTGGCTCCCTTA	120	1	n	3.7e-06	+++++++++++ +
chr19:29361808-29362113	151	AGCGCTCGGGTGCCCGCGGAGGCCTGGGGTGTTCTTCCGGTGCAGGCGCCTGGAGCCGGGAGGTGGGCGGGGCGG	210	2	y	6.4e-08	+ ++++++++++++
chr12:83487729-83488035	1	ATTGTCTGTCTCAGAGTTCTAAAGGTTCGCTCAGGGGAAGCGGCAGGCCAATCAGAGCACGGGATACCGGCCTAC	45	1	n	4.8e-06	++++++++++++
chr12:83487729-83488035	76	CGGCCAATCGGCGCGGCTGGTCGCCAAGTGGGCGGGGCCTGCGTGGTGGTAGTTATTAGGGGAGCTGTCAAAGCC	76	1	n	1.8e-05	+++++++++++ +
chr12:83487729-83488035	76	CGGCCAATCGGCGCGGCTGGTCGCCAAGTGGGCGGGGCCTGCGTGGTGGTAGTTATTAGGGGAGCTGTCAAAGCC	100	2	y	1.3e-07	++++++++++++
chr13:112800689-112801102	1	TAACCAGCTTCCAGATTCGGGGCGGGCTCCGCAAGTCGGCGGGGCGGGGCCGATGGCGCTGATTGGCTGTCTGCG	37	2	y	2e-06	++ ++++++++++
chr13:112800689-112801102	1	TAACCAGCTTCCAGATTCGGGGCGGGCTCCGCAAGTCGGCGGGGCGGGGCCGATGGCGCTGATTGGCTGTCTGCG	56	1	y	1.7e-06	+ +++++++++++
chr13:112800689-112801102	76	CTGGCCTGGGTTTCGTCCCCGCGCGCTGCAGCCGGCGAGACCGCGCACTGGCCGGAGCGGCGCGCCTGGGGCGGG AGGAGCGGTGTTCCTCCAGTCCTCATCCTTAGAGCTCGCCCGGCCTGTTGGAGAGGGCACAGGGCAGCGGAGGGC	139	2	y	6.3e-05	+ +++++++++
chr13:112800689-112801102	376	TGCTCCCGTCAGTCTAAGAGGCTCGCAGTCGCTTGGGG	379	3	n	3.9e-05	++ +++++++ +
chr10:128303178-128303780	76	TACCTGGCTTTTTCTGATTGGCTGGGATGAGCCCGTGGCCCCCGCTGATTGGAAGCGATGGCTGCCAATCCACCG	86	1	y	6.2e-08	+++++++++++++
chr10:128303178-128303780	76	TACCTGGCTTTTTCTGATTGGCTGGGATGAGCCCGTGGCCCCCGCTGATTGGAAGCGATGGCTGCCAATCCACCG	117	1	y	8.6e-05	++ ++++++++ +
chr10:128303178-128303780	76	TACCTGGCTTTTTCTGATTGGCTGGGATGAGCCCGTGGCCCCCGCTGATTGGAAGCGATGGCTGCCAATCCACCG	135	3	n	3.9e-05	+++++ +++++ +
chr10:128303178-128303780	151	TCCGTCTTGCTTGGGTTAGGTTGAGCTAGAGGCGGGGGAGTAGTAGGGAAACTGGAATTTCCCGCGGAGCTGACG	175	2	y	1.8e-05	+ ++++++++++
chr10:128303178-128303780	451	CCTTACCCCCGCCCCGTTTGTGGGTAACTGGCCGTTCTTGTTACCCACCCCCTGGAGAATGCTGGGTAACCACTG	456	2	n	3.8e-05	+++++++++ +
chr10:128303178-128303780	451	CCTTACCCCCGCCCCGTTTGTGGGTAACTGGCCGTTCTTGTTACCCACCCCCTGGAGAATGCTGGGTAACCACTG	492	2	n	9.9e-05	+++ ++++++
chr9:40800767-40801538	76	GAACGCTGCTCTCATTGGTCCGTCGCGGAGGTACCCGCCTTCCTCCCAGGGCATCCTTCCGCCCCCTCCCGCCTG	83	1	y	1.2e-05	++++ +++++++
chr9:40800767-40801538	76	GAACGCTGCTCTCATTGGTCCGTCGCGGAGGTACCCGCCTTCCTCCCAGGGCATCCTTCCGCCCCCTCCCGCCTG	107	2	n	4.6e-05	+++++++ ++ +
chr9:40800767-40801538	76	GAACGCTGCTCTCATTGGTCCGTCGCGGAGGTACCCGCCTTCCTCCCAGGGCATCCTTCCGCCCCCTCCCGCCTG	131	2	n	1.1e-05	+ +++++++++++
chr9:40800767-40801538	151	CGCTGCCGGGTCGCGCACGCGCACTCGCCGGCGACCCTCTCCCCTCCCCCAGCAGCTCTGAGTGACAGAGGACTc	190	2	n	8.8e-05	++++ +++++ +
chr9:40800767-40801538	151	CGCTGCCGGGTCGCGCACGCGCACTCGCCGGCGACCCTCTCCCCTCCCCCAGCAGCTCTGAGTGACAGAGGACTc	207	3	y	1.3e-05	+++ ++++++
chr9:40800767-40801538	226	ccgcgcgcgggctcccggcgccccgccTTCTCCGCTCCCCCCGGGCCGTTCCCAGAGCGGGGGCGAGCGTGAAAG	245	2	n	1.3e-07	+++++++++ ++++
chr9:40800767-40801538	301	TTCCAGAACGCCGCGGTCGTGCGTCATCGCGAGGCGGGGCGGGGAGAAGGCGGGACCTAGGCGAGCGTTCTGGCT	343	2	y	4.8e-07	++++ +++++++++
chr9:40800767-40801538	376	CTTCATTAGTGCAGTCGGCAAGGGCTGGTCGTCCATTGGCTAAGAAGCTATGATCGGCAGCGGGATGGGGCGGCA	404	1	y	2.3e-05	+ + ++++++++
chr9:40800767-40801538	451	CCCTTCTGGAAGGTTCTAAGACAGGGTATAAGAGAGAGGGAAGCGGGCGGAAACCGGTCTCATTGAACGCGGAGG	490	2	y	7.5e-05	+ ++ ++++++ +
chr9:40800767-40801538	751	CGTGGCGGGGGAGGGGAGCCA	754	2	y	8.4e-05	++ +++++ ++++
chr1:131527242-131528037	76	GGCCCCCCAGTTCCCTAAGGAGACTCCGCCAACTCCGCAAGACCCCGCCGGGAAGCTGAACCCACCCCTTTGCCA ATCACCGCCCGCCTAATAGCGACTGACGGGGACTATAGCCAATAGGAACAACTGATCCATAGACGCCAGGAGTAG AGGCGGGGCTGACGAAACTTAGAGGTGTGGCGAACACTAGCTGCCTAGGCGCAGTCCTAGAGTGAGCTCCTCCCC	145	1	n	6.1e-05	+ ++++++++ +
chr1:131527242-131528037	76	GGCCCCCCAGTTCCCTAAGGAGACTCCGCCAACTCCGCAAGACCCCGCCGGGAAGCTGAACCCACCCCTTTGCCA ATCACCGCCCGCCTAATAGCGACTGACGGGGACTATAGCCAATAGGAACAACTGATCCATAGACGCCAGGAGTAG AGGCGGGGCTGACGAAACTTAGAGGTGTGGCGAACACTAGCTGCCTAGGCGCAGTCCTAGAGTGAGCTCCTCCCC	186	1	n	2.8e-06	++++++++ ++++
chr1:131527242-131528037	76	GGCCCCCCAGTTCCCTAAGGAGACTCCGCCAACTCCGCAAGACCCCGCCGGGAAGCTGAACCCACCCCTTTGCCA ATCACCGCCCGCCTAATAGCGACTGACGGGGACTATAGCCAATAGGAACAACTGATCCATAGACGCCAGGAGTAG AGGCGGGGCTGACGAAACTTAGAGGTGTGGCGAACACTAGCTGCCTAGGCGCAGTCCTAGAGTGAGCTCCTCCCC	221	2	y	1.4e-06	+ +++++++++++
chr1:131527242-131528037	301	GGCCTGTGGAAGCCTAAAGTAAAGCTGATGGGCGGGATAAAATGGAAGCGACAGCCAAACACAAACTCTCAAGAG	325	2	y	1.6e-05	+++++++++++
chr1:131527242-131528037	376	AAGACGGGACCAATCGGACCGGGAAAGGGAGGAGGGAAGTTCAGCCAATAAATAGTAGAGAACGGCCTGGACCTT	382	1	n	9.7e-05	+++++++++++
chr1:131527242-131528037	376	AAGACGGGACCAATCGGACCGGGAAAGGGAGGAGGGAAGTTCAGCCAATAAATAGTAGAGAACGGCCTGGACCTT	417	1	n	1.6e-05	++++++++ + ++
chr1:131527242-131528037	451	AGTGTATCCACCAATAAGAAACTCGGGGTGTGTCTTCCAAGTTCACAGGGGGGAGGGTTTAAGCCGAGCAGATGC	458	1	n	3e-05	+ ++++++ ++++
chr1:131527242-131528037	526	TGGCCAATGATCTTAGGGGCTGAGCTAATATTAACCAATCAGAGAGCCGATCTGATATCGGCACCGTTACTGGGG	557	1	n	9.6e-08	+++++++++++++
chr17:23564094-23564420	1	TGTCCTCTCCCGCAGGCGCCTCGAGCGCCGAATCCGCAGGATCCGGTCTGCGCAACGCGCCGGTCCCGCCCCCAG GACACACCGCCCAGAGCCGCGCGGGAGCTCGGCGCTTCCCCAGCAGCGCCCGGGGCAGGAAGCTCGCGCGGGGGG	63	2	n	7.6e-07	+++++++++++
chr17:23564094-23564420	151	CGCTGGGAAACCAGCTGGCGCATGCGCGGGGATAAGCATTTGGCGCTTGTACTATCCAGAATGTCGGAGATGGGC AGCCAATGAACAGGGAGGATTCTCACGACTAAGCCGATCTGACACCCTGGAGCTAGAGATTTGGAAGAAGTCTCA	225	1	n	5.6e-06	++++++++ + ++
chr10:52382010-52382424	1	cacacacacacagacacacacCCGCCGGTCCCCTCCCTTCCCTCGCGCCGCCAACGCCGGCAGCGCAGCTCCAGA	29	2	n	9.9e-05	++++ +++ ++++
chr10:52382010-52382424	76	GCAGCAAAGGAAGCGGGGCTGAAGCAGCGACAGCGACACGGAAGAcccgccccgcccgcaagccggcccgccccc gccgcgcgTGCGTAGCGGAGCCCAGAGCAGGCGCAGCCCAGAGGGAGAAAGTGGGCGGGGCCGTACGAGAGCTTA GCCAATGAAAAGCCTTCGCCTCCACAAGCCTGTCTGCGACCATTTTGACGACCGGCAAAACCCTGAGAAGCAAAG	119	2	n	1.9e-05	+ ++++++++ +++
chr10:52382010-52382424	76	GCAGCAAAGGAAGCGGGGCTGAAGCAGCGACAGCGACACGGAAGAcccgccccgcccgcaagccggcccgccccc gccgcgcgTGCGTAGCGGAGCCCAGAGCAGGCGCAGCCCAGAGGGAGAAAGTGGGCGGGGCCGTACGAGAGCTTA GCCAATGAAAAGCCTTCGCCTCCACAAGCCTGTCTGCGACCATTTTGACGACCGGCAAAACCCTGAGAAGCAAAG	140	2	n	1.4e-06	+ +++++++++ ++
chr10:52382010-52382424	76	GCAGCAAAGGAAGCGGGGCTGAAGCAGCGACAGCGACACGGAAGAcccgccccgcccgcaagccggcccgccccc gccgcgcgTGCGTAGCGGAGCCCAGAGCAGGCGCAGCCCAGAGGGAGAAAGTGGGCGGGGCCGTACGAGAGCTTA GCCAATGAAAAGCCTTCGCCTCCACAAGCCTGTCTGCGACCATTTTGACGACCGGCAAAACCCTGAGAAGCAAAG	198	2	y	2.3e-07	++++++++++++
chr10:52382010-52382424	76	GCAGCAAAGGAAGCGGGGCTGAAGCAGCGACAGCGACACGGAAGAcccgccccgcccgcaagccggcccgccccc gccgcgcgTGCGTAGCGGAGCCCAGAGCAGGCGCAGCCCAGAGGGAGAAAGTGGGCGGGGCCGTACGAGAGCTTA GCCAATGAAAAGCCTTCGCCTCCACAAGCCTGTCTGCGACCATTTTGACGACCGGCAAAACCCTGAGAAGCAAAG	224	1	n	7.6e-07	++++++++ + +++
chr5:88764899-88765284	1	CCTCCCACTGCTCATCCCGCAGGCCCCGCCCCCTCCGGCTCACAGCTCGTCGCGCACGGTCAGTCGCCCGGCTCT	23	2	n	1.1e-09	++++++++++++++
chr5:88764899-88765284	76	CTCAGGGTTCTCCTCACAAGCCCCGCCCCCTACCCTGCGCTCCTGGGACGCCCGGCCCGCCCGGAGGAACCACAG	95	2	n	2.2e-08	++++++++++++ +
chr5:88764899-88765284	151	ACATGCAGATCCCGCGAGGGCGAGGCGTATAGGGTGGGAGTCGGGGCCGTCAGGGCGGGTTCTCCACGGTCTGCC	163	2	y	4.6e-05	+ + +++++ +++
chr8:69625170-69625846	1	aggaCGTCCCCGCCAGCCCGGATCGTGACGTCATCCGCGTACTGGCTTCCGCCCATCCCCCGCCCCCCGCAGGGC	57	2	n	3e-06	+++++++++++ +
chr8:69625170-69625846	376	AAAGAACCCGCCCCCCCGCCTCCTAGAAGCTTCTGATTGGACAACCTGTCTGTAGCTCCTGATTGGTTAGAACTG	388	2	n	1.4e-05	+++++++++++
chr8:69625170-69625846	376	AAAGAACCCGCCCCCCCGCCTCCTAGAAGCTTCTGATTGGACAACCTGTCTGTAGCTCCTGATTGGTTAGAACTG	405	1	y	4.2e-06	+++++++++++ ++
chr8:69625170-69625846	376	AAAGAACCCGCCCCCCCGCCTCCTAGAAGCTTCTGATTGGACAACCTGTCTGTAGCTCCTGATTGGTTAGAACTG	431	1	y	4.2e-06	++ +++++++++++
chr8:69625170-69625846	451	CTCTAGGTGATCTGAGTGACAGGAGTAGCTCCTCTTGCAGTTCCTTAGGCTGTGAGTCTAGAGCCCATTGTTTAG	461	3	y	2.4e-06	+++ +++++++
chr2:30364031-30364378	1	AATCCTAGTGACCAATCGGAGGAGAGAAGAGGACATTCCACACTGCAACCACACTTAGGGGGCGGTGCGAAAAGC	9	1	n	3.3e-06	++++++++++++++
chr2:30364031-30364378	1	AATCCTAGTGACCAATCGGAGGAGAGAAGAGGACATTCCACACTGCAACCACACTTAGGGGGCGGTGCGAAAAGC	55	2	y	7.9e-05	+++++++++ ++
chr2:30364031-30364378	76	GAGGGAGGCGGAGTCTGCGTGATCACGTAGCTCACCCCATTGGCCAAGGGCCTCGCCGATGCGGAGCGATATGGA	76	2	y	9.6e-06	+ +++++++++ +
chr2:30364031-30364378	151	GACGCTCATTGGTCAGAGCTGTGTTGGCCGGCCCGAGGCCACGCCTTCCCCATCCAGCGGCGTGGTTTGGTTGTA	152	1	y	2.3e-05	+ ++ ++++++++
chr2:30364031-30364378	151	GACGCTCATTGGTCAGAGCTGTGTTGGCCGGCCCGAGGCCACGCCTTCCCCATCCAGCGGCGTGGTTTGGTTGTA	188	2	n	4e-05	+++ +++++ ++++
chr2:30364031-30364378	226	TTGCCGCCTGGAAAGGAGACGCTGCCCTTCCCCAGCGATGGGATCCCTGGTGAGTGACGGCCACTGCGCGGGCGA	274	3	y	7.7e-06	++++ ++++ +++
chr12:85280365-85280656	76	TTCTCCAACGCTGCCCTGCACGCCCATCACCGCGATTTAACCAATCAGAGGTGGCTCCTTGTTCAAGAACCCGCC CAAGGGTGGGGCTTCAGGACAAGTGGGTCACGTTTTGGAGAGATCCTGGGATTAATTTTTTTAAGTGGAGAGTCC	113	1	n	6.2e-08	++++++++++++++
chr12:85280365-85280656	76	TTCTCCAACGCTGCCCTGCACGCCCATCACCGCGATTTAACCAATCAGAGGTGGCTCCTTGTTCAAGAACCCGCC CAAGGGTGGGGCTTCAGGACAAGTGGGTCACGTTTTGGAGAGATCCTGGGATTAATTTTTTTAAGTGGAGAGTCC	149	2	y	2.8e-05	+ +++ +++++
chr14:19823767-19824094	1	GGGACAGGAGAAGCGAGGTGAGGCGGGCAGCGCAGGCACCGGCGACGCGGCGAAGGGGCGGGGCGGTGACCGACG	16	2	y	7.5e-05	++ ++++++++
chr14:19823767-19824094	1	GGGACAGGAGAAGCGAGGTGAGGCGGGCAGCGCAGGCACCGGCGACGCGGCGAAGGGGCGGGGCGGTGACCGACG	51	2	y	3.5e-08	+++++++++++++
chr14:19823767-19824094	76	CTCCGACGGACGGCGGACGGAGCCAATCGCGGCTTAGGAACGCCCGCAGCCCGCAAGCGCTGGCCAATCATCGCT	95	1	n	8e-05	+++++++++ +
chr14:19823767-19824094	76	CTCCGACGGACGGCGGACGGAGCCAATCGCGGCTTAGGAACGCCCGCAGCCCGCAAGCGCTGGCCAATCATCGCT	136	1	n	2.6e-05	++++++++++ +
chr14:19823767-19824094	151	GCTGCTTAGGAGGCGGGGCCACGTCGGTGCACGTCGACGCTCAAATAAACTTTATTGTCAGCTTCCTAGTTGTAC	156	2	y	3.4e-06	++++++++++++
chr9:100545801-100546437	1	TGCACCGCGGACACCCGAGCTCCGCCGAGCGGCCTCCCCGCCCCCTCCGCTCCGCTCCGCCGCCAGCAGACGGCG	35	2	n	1.3e-07	+++++++++++++
chr9:100545801-100546437	301	TAGCTCTCGGAGAGGGGCGGGGCGCGCGCAACCGGTGGGCGGACCGTTGCGGGCAGGAAACCCGCTCCACGCCCA	310	2	y	4.9e-08	+ ++++++++++++
chr9:100545801-100546437	301	TAGCTCTCGGAGAGGGGCGGGGCGCGCGCAACCGGTGGGCGGACCGTTGCGGGCAGGAAACCCGCTCCACGCCCA	332	2	y	1.6e-05	+++++++++ +
chr9:100545801-100546437	376	ATCTAATAGGCTCCATCGCCTCCTGCGCCCGCCCCTGACGCTTCAGCGGAATGCGCCGCTCCGGGATTGGGCGAG	401	2	n	5.9e-05	+++++++++ +
chr9:100545801-100546437	451	CGGGCTTGTCAATCAAGCGCGGGCCCTGAGTGGTCCCTGAGCTGAGACTGCGCGGCCTTTGGACAGAAGGTGAGG	454	3	n	1.5e-06	++ +++++++++++
chr9:100545801-100546437	526	AGCGCCGGGCCCCACCGCCCTGTTCTCCCCTAGCCTCCTCGGTGGCTGCTTACTTTCCGCCTCTCCCACTGCTAC	579	2	n	1.8e-05	+ +++++++++++
chr9:100545801-100546437	601	TAAAACCTGTCATTCATTTTAAATCGCTCATTAATG	605	3	n	1.1e-05	++++++++ +++
chr2:53191192-53192224	76	CGGGGCCAAAGGGTAAAGGCTGCCCTGAGCTGCGGGGCGGGATCAGCGGGGCCAATAAACTGACAGGCTTCCCTA	105	2	y	4.3e-05	+ +++++++++
chr2:53191192-53192224	76	CGGGGCCAAAGGGTAAAGGCTGCCCTGAGCTGCGGGGCGGGATCAGCGGGGCCAATAAACTGACAGGCTTCCCTA	130	3	y	7.2e-05	+ ++++++++++
chr2:53191192-53192224	151	CTGTCCAATCAGAGCGCGAGACCGACAGGCAGCTCTGCGGCGATTCGCCCCCTGCCTCGCTCGGCGTCGCCTGCA	152	1	n	8.3e-06	++ ++++++++++
chr2:53191192-53192224	151	CTGTCCAATCAGAGCGCGAGACCGACAGGCAGCTCTGCGGCGATTCGCCCCCTGCCTCGCTCGGCGTCGCCTGCA	167	3	y	4.8e-05	++ +++ +++++++
chr2:53191192-53192224	226	TGGAGGGGGGGGGAGGGGGGACGGAGGAAGTTTCTGCGTCGAGTGCTCTGCCGGGGAAACTCTACCAACTTCCCC	231	2	y	9.3e-05	++++++++ ++++
chr2:53191192-53192224	301	CAGGAAAGGGGACACGGCGGGGACCCAGATTCCCGGGTTCGGGCCACCGCACCCCGTCGGGGGGTGGGGCAGTGG	357	2	y	1.5e-05	++++++ +++++
chr2:53191192-53192224	376	CGTCCAGCCCCTCGCCCTAGTTACGTTCGCCCCACAAACCTGAGGCCACCAGGGGTGGGGTGGGGGTGGGGCGGG	434	2	y	1.6e-06	++ +++++ +++++
chr2:53191192-53192224	526	GTGGGGGGGAGAAACTCGAGAGCTGCGCGCGCGCCCGGCATAGTGAAGGGCGGAGGCGCGAACTGTATCTGGCGG	568	2	y	4e-05	+ ++ ++++++ +
chr2:53191192-53192224	676	TGGGGCTCGAGAGGTGCGTGCCCACAGGACCCGAAAGGGTGGAATAAATGAGAGTGTTGTCGCGGCGGGCCATGG	707	2	y	9.9e-05	+++ +++ ++ +
chr2:53191192-53192224	826	GCGGTGGTTGGGTCCGCCGACGGCCGTCTCTGATTGGCTGTAGCCGGGGCGGGGCGTGGCGGTGGTGGACAGCCG	852	1	y	1.2e-07	+++++++++++++
chr2:53191192-53192224	826	GCGGTGGTTGGGTCCGCCGACGGCCGTCTCTGATTGGCTGTAGCCGGGGCGGGGCGTGGCGGTGGTGGACAGCCG	867	2	y	7.9e-06	+ ++++++++++
chr6:124662698-124663246	1	AGCGCCGGCGACCGAGAGTAACCTCGCGGTCTGGTGAcgcccccgcccccccccgccccccccccgccccGACTC	40	2	n	1.4e-06	+++++++++++++
chr6:124662698-124663246	1	AGCGCCGGCGACCGAGAGTAACCTCGCGGTCTGGTGAcgcccccgcccccccccgccccccccccgccccGACTC	61	2	n	4.6e-05	+++++++++ +
chr6:124662698-124663246	76	TCGCCTGCTCCTGTCTCAACCAATGGGAAGGCAGCGAGCAAGCCGGCCGGACACCCGTCCGACCCACTCCTGCCC	92	1	n	1.9e-06	++++++++ +++++
chr6:124662698-124663246	151	GGAGCCGTCCGGACCGAGTTGTACTGTCACCTCGCCTCGCGCTCCCGCCTGCTCCAATAGCAGCTGGGTCGCGAT	192	2	n	8.4e-05	++++++++ ++++
chr6:124662698-124663246	226	CGCAAgccccgccccgccccgccggcccggcccgTTTCCCTTCCTCACGGGAGTCACCTTTGCCTTACAAACGCT	231	2	n	9e-07	++++++++++ +++
chr6:124662698-124663246	301	CGGCCCCGCCCTCTTCCTACCTTGCTGCGCTCGGCCCCGCCCCCGGCTGGCTCGACCAATAATCGGGTGGGTCTA	303	2	n	3.5e-08	+++++++++ ++ +
chr6:124662698-124663246	301	CGGCCCCGCCCTCTTCCTACCTTGCTGCGCTCGGCCCCGCCCCCGGCTGGCTCGACCAATAATCGGGTGGGTCTA	334	2	n	1.9e-07	+++++++++++ +
chr6:124662698-124663246	301	CGGCCCCGCCCTCTTCCTACCTTGCTGCGCTCGGCCCCGCCCCCGGCTGGCTCGACCAATAATCGGGTGGGTCTA	353	1	n	4.9e-05	++++++++ + ++
chr6:124662698-124663246	376	GAGGCTCTGGGCGGGCCCGCAGCCAATGCGCACGCCGTGGGCGGGCCCCCGGCCGGAATTGGGGGTGAAGCCACC	379	2	y	3.1e-05	+ ++++++++ +
chr6:124662698-124663246	376	GAGGCTCTGGGCGGGCCCGCAGCCAATGCGCACGCCGTGGGCGGGCCCCCGGCCGGAATTGGGGGTGAAGCCACC	409	2	y	5.9e-06	+ +++++++++ +
chr1:128359591-128359927	76	GCTGCCACTTCGCGCGCGCCTCCGGCTAGCCCCGCCCTCTCACCTCAGCCAATAACAGGGTAGGAGCTGAGCTAC	104	2	n	7.6e-07	+++++++++ +++
chr1:128359591-128359927	76	GCTGCCACTTCGCGCGCGCCTCCGGCTAGCCCCGCCCTCTCACCTCAGCCAATAACAGGGTAGGAGCTGAGCTAC	121	1	n	3.3e-06	++++++++ + +++
chr1:128359591-128359927	151	TTCGCGCCAAACCCGTCCAATCAATGGCGGTTCCGTACAGAGCCCCGCCCACCGCACGCACTTTTCGCGCCAAAA	164	1	n	6.6e-05	++ +++++++ ++
chr1:128359591-128359927	151	TTCGCGCCAAACCCGTCCAATCAATGGCGGTTCCGTACAGAGCCCCGCCCACCGCACGCACTTTTCGCGCCAAAA	192	2	n	9.9e-08	++++++++++++ +
chr8:70527652-70527882	1	AGGTGGTGTCGAGGGCGCGAGACGGACGTGTGCACAAGCCAATAAACACGGCAGACGCGGTGTGAACAGCCAATG	36	1	n	2.1e-05	+++++++ + +
chr8:70527652-70527882	76	GGTGCGCGGGGGCGGGGCTGCGTATCTGAAGCTGTTTCCCGAggcgcggcggccgcggctgggggcggggAGGGG	80	2	y	1.9e-07	+ +++++++++++
chr8:70527652-70527882	76	GGTGCGCGGGGGCGGGGCTGCGTATCTGAAGCTGTTTCCCGAggcgcggcggccgcggctgggggcggggAGGGG	133	2	y	1.2e-06	+ ++++++++++
chr5:150118454-150118784	1	TGGAGCTGTCTATTTCTGGGTTGGCAAAGCAGAAGCTCTGGGTGCCCACAGGAAGCCTCGCCCAGCTTGGGTCCC CACCCTCTAGCGCGCCCCTGGAGAGGGCCTGCCCCGAGGGGCGGAGCCAGACACTCCAGCAGCCAATGAGCGAGC	72	2	n	3.3e-05	++++ +++ ++
chr5:150118454-150118784	1	TGGAGCTGTCTATTTCTGGGTTGGCAAAGCAGAAGCTCTGGGTGCCCACAGGAAGCCTCGCCCAGCTTGGGTCCC CACCCTCTAGCGCGCCCCTGGAGAGGGCCTGCCCCGAGGGGCGGAGCCAGACACTCCAGCAGCCAATGAGCGAGC	109	2	y	2.3e-06	+++++++++ ++
chr5:150118454-150118784	1	TGGAGCTGTCTATTTCTGGGTTGGCAAAGCAGAAGCTCTGGGTGCCCACAGGAAGCCTCGCCCAGCTTGGGTCCC CACCCTCTAGCGCGCCCCTGGAGAGGGCCTGCCCCGAGGGGCGGAGCCAGACACTCCAGCAGCCAATGAGCGAGC	135	1	n	5.6e-06	++++++++ ++ +
chr5:150118454-150118784	151	GGCTggggccggcgccgggggcggggcTGCACTTGACAGTGGCGGTCGCCCGGCAGCCGAGCGGGCGCAgcggcg	164	2	y	1.9e-07	+ +++++++++++
chr17:23771571-23771908	76	CGCGGAGCCATTCCTGAGGCGGATACCACTTCTCCGGGTCTTCTCTGCGCAGTGTCAACTTGACACCCTAGCCAA TCAGCATCAGGGGCGGGTCTACTAACAAGGAAGAAGGCGGGACAACCCATGGTCCCGCTACTGCATCCGGGAGGG CGGGGCGACAGGTGAATTTGTAGCAAGGATGCAGGCTGGGAGTCATCACTAAAAGGATGACAGCGCTATTGATAG	144	1	n	1.9e-06	+++++++++++ +
chr17:23771571-23771908	76	CGCGGAGCCATTCCTGAGGCGGATACCACTTCTCCGGGTCTTCTCTGCGCAGTGTCAACTTGACACCCTAGCCAA TCAGCATCAGGGGCGGGTCTACTAACAAGGAAGAAGGCGGGACAACCCATGGTCCCGCTACTGCATCCGGGAGGG CGGGGCGACAGGTGAATTTGTAGCAAGGATGCAGGCTGGGAGTCATCACTAAAAGGATGACAGCGCTATTGATAG	180	2	y	9e-07	+ ++ +++++++++
chr17:23771571-23771908	76	CGCGGAGCCATTCCTGAGGCGGATACCACTTCTCCGGGTCTTCTCTGCGCAGTGTCAACTTGACACCCTAGCCAA TCAGCATCAGGGGCGGGTCTACTAACAAGGAAGAAGGCGGGACAACCCATGGTCCCGCTACTGCATCCGGGAGGG CGGGGCGACAGGTGAATTTGTAGCAAGGATGCAGGCTGGGAGTCATCACTAAAAGGATGACAGCGCTATTGATAG	218	2	y	1.3e-07	+++ +++++++++
chr16:96127792-96128298	1	CCAGCCTCCATTGGCTGTCTAGGCCCACCGCGCGCGCCAGCGCCCCAGCCCTTGCTCCCGAATAGGCACGGCGAG CTGTCACTCCGCCGCATcgccccgccccctggccccccacccctgcgggcgcgaccccggccgaggggcgggccg	4	1	y	6.6e-05	+ + ++++++++
chr16:96127792-96128298	1	CCAGCCTCCATTGGCTGTCTAGGCCCACCGCGCGCGCCAGCGCCCCAGCCCTTGCTCCCGAATAGGCACGGCGAG CTGTCACTCCGCCGCATcgccccgccccctggccccccacccctgcgggcgcgaccccggccgaggggcgggccg	74	3	n	2.6e-05	++++++++ ++
chr16:96127792-96128298	1	CCAGCCTCCATTGGCTGTCTAGGCCCACCGCGCGCGCCAGCGCCCCAGCCCTTGCTCCCGAATAGGCACGGCGAG CTGTCACTCCGCCGCATcgccccgccccctggccccccacccctgcgggcgcgaccccggccgaggggcgggccg	94	2	n	4.9e-08	++++++++++++
chr16:96127792-96128298	1	CCAGCCTCCATTGGCTGTCTAGGCCCACCGCGCGCGCCAGCGCCCCAGCCCTTGCTCCCGAATAGGCACGGCGAG CTGTCACTCCGCCGCATcgccccgccccctggccccccacccctgcgggcgcgaccccggccgaggggcgggccg	109	2	n	7.1e-05	++++ +++++ +
chr16:96127792-96128298	1	CCAGCCTCCATTGGCTGTCTAGGCCCACCGCGCGCGCCAGCGCCCCAGCCCTTGCTCCCGAATAGGCACGGCGAG CTGTCACTCCGCCGCATcgccccgccccctggccccccacccctgcgggcgcgaccccggccgaggggcgggccg	136	2	y	3.8e-06	++++++++++ +
chr17:64331938-64332458	1	tggtgacggcggcggcggcggcggcgCGTCCCGCCCCTTGCGCTGCGAAGGAGGCGGAGGAAGGGAGCGCTTTAG CCCCGCCCCCTGAGGGCGCAGCCAATAGACTTCACGGCCCTCTGCAGGGGGAAAAGCACGCATCCAATCGCAGTC	28	2	n	1.9e-07	++++++++++++ +
chr17:64331938-64332458	1	tggtgacggcggcggcggcggcggcgCGTCCCGCCCCTTGCGCTGCGAAGGAGGCGGAGGAAGGGAGCGCTTTAG CCCCGCCCCCTGAGGGCGCAGCCAATAGACTTCACGGCCCTCTGCAGGGGGAAAAGCACGCATCCAATCGCAGTC	47	2	y	1.8e-05	+ +++++++++ +
chr17:64331938-64332458	1	tggtgacggcggcggcggcggcggcgCGTCCCGCCCCTTGCGCTGCGAAGGAGGCGGAGGAAGGGAGCGCTTTAG CCCCGCCCCCTGAGGGCGCAGCCAATAGACTTCACGGCCCTCTGCAGGGGGAAAAGCACGCATCCAATCGCAGTC	75	2	n	6.6e-07	++++++++++++
chr17:64331938-64332458	1	tggtgacggcggcggcggcggcggcgCGTCCCGCCCCTTGCGCTGCGAAGGAGGCGGAGGAAGGGAGCGCTTTAG CCCCGCCCCCTGAGGGCGCAGCCAATAGACTTCACGGCCCTCTGCAGGGGGAAAAGCACGCATCCAATCGCAGTC	136	1	n	3.3e-05	++ +++++++ ++
chr17:64331938-64332458	151	CTAGAAGTAGGCCTACGTCATGGTTGGACGTGGCAGAAAAAGGGAAAATAACTGGGGCTGTCTCTCTGCCTGGCG	206	3	n	4.8e-05	+++++++ ++
chr17:64331938-64332458	226	CCTGCAAGCTCTCTCCCAGGCCCTTCGCGGATTGGCCGAGGAGAGTGGAGACGCGCTTGGCTCCGCCCCCTCTCT	285	2	n	4.8e-07	++ ++++++++++
chr17:64331938-64332458	301	GGCCCTGCGCCCGCCCCTGCAGCACTGCGACGTTTGGGCGGGGGCGGGGCGCCGAGGCCCGATCCACTGTCAGGC	337	2	y	4.9e-08	++ +++++++++++
chr17:64331938-64332458	376	CTTTTGTGGTTTGGCTGGGAGAAAAGGGCGGGGTCTCCCGAAGGGAAGGGGGTGTGGAGAGCTGAGCGCAGGACT	396	2	y	2e-06	+ ++ ++++++++
chr16:4214014-4214395	1	TTCTCTTTCCAGAGCCTGAACGGGGAGGGGGAGGGGGCGGGGCACGCTTGTACGTCACCCCCCCCGCGGCGTCAC	30	2	y	1.1e-09	++++++++++++++
chr16:4214014-4214395	76	CACGCACGGCCCCCGCCCCGCCCCTCCACCTGCGCCGGCCGCGGCGGAAAGAGCCGAGCGCGCTCGGGTGGAAGG	90	2	n	9e-07	+++++++++++++
chr16:4214014-4214395	301	AGACCCCCCCCCCCGCCAGGCTCGGAGTCAGCGCTGATCCGGGCCCAGCCCGTCCGGTCCCGCCCCGCCCCGGCA	357	2	n	2.3e-06	++++++++++ +++
chr12:118301198-118302478	1	GAGACCGAGGGGGGTGGAGAATACGTACCGCTCATCCCGCATTAACAGGACAAACCCTCTCAGAGACACTGGGAT	7	2	y	3.1e-05	+ ++++++ ++ +
chr12:118301198-118302478	76	AGAGGTGGGTGGGGGTGGGGGCGAGGCGGGAGGAGAGGCCGGTCCCGCCCGCCCGCGGTGGCTCGGAGGAGGCTG	89	2	y	1.2e-05	++ +++++++ +++
chr12:118301198-118302478	76	AGAGGTGGGTGGGGGTGGGGGCGAGGCGGGAGGAGAGGCCGGTCCCGCCCGCCCGCGGTGGCTCGGAGGAGGCTG	117	2	n	1.3e-05	+++++++++ +++
chr12:118301198-118302478	226	CCGAGCCCGGCTGACTCGCCCTTGATTGACAgcggcggcgcgcggcgagggcggcggcgcgggccggggggcgga gccagggcggcgcgagcgcggcgACTCCCCACCCCCCTCGGCCTGCCTCCGCCGGCGCCGCCGACTCTCCACCCC TTCCCCCAGCGGATTGGCCGCCGACCTGCCGGGGCCGGGGCGCTGGGGCCGCCCTTTCTCCTCCCCTTTGCCCGG	246	3	y	4.9e-07	+++++++++++++
chr12:118301198-118302478	226	CCGAGCCCGGCTGACTCGCCCTTGATTGACAgcggcggcgcgcggcgagggcggcggcgcgggccggggggcgga gccagggcggcgcgagcgcggcgACTCCCCACCCCCCTCGGCCTGCCTCCGCCGGCGCCGCCGACTCTCCACCCC TTCCCCCAGCGGATTGGCCGCCGACCTGCCGGGGCCGGGGCGCTGGGGCCGCCCTTTCTCCTCCCCTTTGCCCGG	289	2	y	1.2e-06	+++++++++ ++
chr12:118301198-118302478	226	CCGAGCCCGGCTGACTCGCCCTTGATTGACAgcggcggcgcgcggcgagggcggcggcgcgggccggggggcgga gccagggcggcgcgagcgcggcgACTCCCCACCCCCCTCGGCCTGCCTCCGCCGGCGCCGCCGACTCTCCACCCC TTCCCCCAGCGGATTGGCCGCCGACCTGCCGGGGCCGGGGCGCTGGGGCCGCCCTTTCTCCTCCCCTTTGCCCGG	326	2	n	9.6e-06	++++ ++++++ +
chr12:118301198-118302478	226	CCGAGCCCGGCTGACTCGCCCTTGATTGACAgcggcggcgcgcggcgagggcggcggcgcgggccggggggcgga gccagggcggcgcgagcgcggcgACTCCCCACCCCCCTCGGCCTGCCTCCGCCGGCGCCGCCGACTCTCCACCCC TTCCCCCAGCGGATTGGCCGCCGACCTGCCGGGGCCGGGGCGCTGGGGCCGCCCTTTCTCCTCCCCTTTGCCCGG	366	2	n	2.6e-05	+ ++ ++++++++
chr12:118301198-118302478	526	GCTGCCGGCAGGCCCTCCATACAGCCAAACTTGTTGTCTCAGGATATCCCGCCCCCTACTCAGTTCCCGGCGCCC	571	2	n	2e-06	+++++++++++ +
chr12:118301198-118302478	751	GTGAGCATGGCTTTTCCTAAGGCGCATCCGGACCCGGGCGCCCTTTTTCCCTGGCTCGGCTCTCATTGGATGAGG	809	1	y	8.3e-06	++++ +++++ ++
chr12:118301198-118302478	826	CCGCTGACGCACAGTGAGTCGTGGGAGGAGGCGGGCGGGCCTCTCCCGCAAAGGCTTTCGGGCCTCGTAGTTTTT	849	2	y	1.8e-05	++++++++++++
chr12:118301198-118302478	901	GACGGCTATTCCGATTGAGGCACCGCCTTCCTCCCGCCCCCGAACGCGGCCTGGCTGCGGAGCCTAGAGCTGCCC	920	2	n	5.9e-05	++ ++++++ ++ +
chr12:118301198-118302478	1126	CGCTCCCCGCGGGGCGAGCTCACACCCGGAGCGCGCGGCGATTGAGCGGACCGAGGTGTTGGGAGGCGGGGTCTG	1184	2	y	2.3e-05	+++++++++++
chr12:24651081-24652377	1	ACTGCCGCCGCGCCGCCGCCGGGACCTTTCCCCTACTTTCCAGGCCTCACGCCCCGCCTCTAGCCCGGACCAAAA	51	2	n	9e-07	+++++++++++ +
chr12:24651081-24652377	76	CACGTGCCGCCGCCCGCCCCGCCGGATCACGCCGCAGCCAGGCTCCGATCACGCGCCCCCCCGCGGCGCCCATTG GCCCGCTTCTTGCCGGCCTGGCGCTGATTGGCTGGCGGCAGAGGCCATGCCCCCAGCAGGGAGCGGTGTATTTTG	86	2	n	8.8e-05	++++++++ ++
chr12:24651081-24652377	76	CACGTGCCGCCGCCCGCCCCGCCGGATCACGCCGCAGCCAGGCTCCGATCACGCGCCCCCCCGCGGCGCCCATTG GCCCGCTTCTTGCCGGCCTGGCGCTGATTGGCTGGCGGCAGAGGCCATGCCCCCAGCAGGGAGCGGTGTATTTTG	141	1	y	6.6e-05	+ ++ +++++++
chr12:24651081-24652377	76	CACGTGCCGCCGCCCGCCCCGCCGGATCACGCCGCAGCCAGGCTCCGATCACGCGCCCCCCCGCGGCGCCCATTG GCCCGCTTCTTGCCGGCCTGGCGCTGATTGGCTGGCGGCAGAGGCCATGCCCCCAGCAGGGAGCGGTGTATTTTG	171	1	y	1.7e-06	+ +++++++++++
chr12:24651081-24652377	226	GTTTgcccgcgcgccccgcccagggccgctccctccgtggcgccccgcccctcccgcgcctcccgggccgcgcgg	238	2	n	1.1e-05	++++++++++ +
chr12:24651081-24652377	226	GTTTgcccgcgcgccccgcccagggccgctccctccgtggcgccccgcccctcccgcgcctcccgggccgcgcgg	267	2	n	1.4e-08	++++++++++++++
chr12:24651081-24652377	301	AGGCAGAGCCGCGCGGCAAGGAAGGCGGAGGTGCGCGCCGGGAACAGACGCTCGGGACACCGCCGCCCGCCGCAC	318	2	y	6.7e-05	++ ++++++ +
chr12:24651081-24652377	601	CCGGGTCAGGGTGGGGAGGGGGGTGTGTTAGCGCGGCAGCCTGCCTTCAGCTTTGTCTCTGGTCCGCTGCGGCCC CGCCCGGCGCGGCTATTTCCAGCCATGACGTCACCCGAATCCAGAGGAGGACCGCTGTTGGATGTGGGCGCGGCT	604	2	y	8.8e-05	++ +++ ++++
chr12:24651081-24652377	601	CCGGGTCAGGGTGGGGAGGGGGGTGTGTTAGCGCGGCAGCCTGCCTTCAGCTTTGTCTCTGGTCCGCTGCGGCCC CGCCCGGCGCGGCTATTTCCAGCCATGACGTCACCCGAATCCAGAGGAGGACCGCTGTTGGATGTGGGCGCGGCT	672	2	n	4.6e-05	+++++++++ + +
chr12:24651081-24652377	751	GGCGGGAACTTGGGGGCGGAGTCAAAGCTGGGGCGCAGCATGGGGGCGTGGCCAAAGCTAGGGCGTGGGCAAGCG	759	2	y	1.6e-05	++++++++ +
chr12:24651081-24652377	751	GGCGGGAACTTGGGGGCGGAGTCAAAGCTGGGGCGCAGCATGGGGGCGTGGCCAAAGCTAGGGCGTGGGCAAGCG	789	2	y	3.5e-05	+++++++ +++
chr12:24651081-24652377	826	TGCTTGGAGGAGATATTGGGGGAACTAGATGGGACCAAGGCGAAGGACATGGTGAAAGCACCTGGTAGTAGTGTA AGAGGGCGGAACCGAAGCTAGAGAGCTTGGTGAGAACCTCTGGTAGGACTGTGGGGCGGGGCCGATGTAAGAGTG	899	2	y	1.4e-05	++ ++++++ ++
chr12:24651081-24652377	826	TGCTTGGAGGAGATATTGGGGGAACTAGATGGGACCAAGGCGAAGGACATGGTGAAAGCACCTGGTAGTAGTGTA AGAGGGCGGAACCGAAGCTAGAGAGCTTGGTGAGAACCTCTGGTAGGACTGTGGGGCGGGGCCGATGTAAGAGTG	949	2	y	3.8e-06	+ ++++++++++
chr12:24651081-24652377	976	CATAGTGAGAGTTTATCTAGGGGCGGGGCAAAGGCTAAGCCGAAGGGAGGGAGTGTGGTGAGAGCATCTGGTAGG	991	2	y	3.4e-06	+++++++++++
chr12:24651081-24652377	1051	AGTGCAGTGGGAGGGGCTGTGGGTGGAGCCAAAGTAAAGGTATCTCAGGAGGGTGTGGCCAGAGTGCCTGGATGG	1066	2	y	2.3e-05	+ +++++ ++ ++
chr12:24651081-24652377	1201	GTGTCAGCCAAGCTTAATGGGCTGGTAAGGGTAGAGCTGGGCGAAGGGTGGAGTCTAAGTGAGAAGGGGTGTGGT	1241	2	y	7.9e-05	+ ++ +++ ++ +
chr15:77842054-77842635	76	ACCCAGCTCTGGTGCGCGCCGCCCTCCCTGCCCCGCCCTTCCAAGAGGAGGGCGGGTCTACAGCTCGCCGCCGGC TCGTGGGTGGAGCTTCCAAGAGTCCCCGCCCTCTCCCCACACTGCCCAATCCAACAGGAGTCTGGCCTAAACTGA	105	2	n	2.3e-06	+++++++++ +++
chr15:77842054-77842635	76	ACCCAGCTCTGGTGCGCGCCGCCCTCCCTGCCCCGCCCTTCCAAGAGGAGGGCGGGTCTACAGCTCGCCGCCGGC TCGTGGGTGGAGCTTCCAAGAGTCCCCGCCCTCTCCCCACACTGCCCAATCCAACAGGAGTCTGGCCTAAACTGA	120	2	y	5.9e-06	+ ++ +++++++ +
chr15:77842054-77842635	76	ACCCAGCTCTGGTGCGCGCCGCCCTCCCTGCCCCGCCCTTCCAAGAGGAGGGCGGGTCTACAGCTCGCCGCCGGC TCGTGGGTGGAGCTTCCAAGAGTCCCCGCCCTCTCCCCACACTGCCCAATCCAACAGGAGTCTGGCCTAAACTGA	150	2	y	5.9e-05	+++++ ++ ++
chr15:77842054-77842635	76	ACCCAGCTCTGGTGCGCGCCGCCCTCCCTGCCCCGCCCTTCCAAGAGGAGGGCGGGTCTACAGCTCGCCGCCGGC TCGTGGGTGGAGCTTCCAAGAGTCCCCGCCCTCTCCCCACACTGCCCAATCCAACAGGAGTCTGGCCTAAACTGA	173	2	n	4.8e-07	++++++++ ++++
chr15:77842054-77842635	226	CAGATTTTCGGCCTATAAACAGACAAGAGATGGAAGCCGGAGTGCTGAGATTCATCCTCCCCATCTGTCCCCACC TCCGCCCACCCCACCTTCCACCCGCGCTTCCTAGGCGGGAGCCACGCCTTGTTGGGCGGGTCCAATGGACAGCCA	299	2	n	1.3e-05	+ +++++++++++
chr15:77842054-77842635	376	GGTTACAGGACCAGGATTGACGCGGATTTCATCCAATCAGAAGCAAGCGGCTCAGGCGCGCTGGGCTCCTGGTCC	405	1	n	1.1e-06	++ +++++++++++
chr15:76671476-76671809	1	CAACCAATCAGCTACCGGAGCTGACCCCGCCCCTGTCAATCTACAGTGGATGACTCTGTCCCTGGAGGACGCTCC	1	1	n	1e-05	+++++++++++
chr15:76671476-76671809	1	CAACCAATCAGCTACCGGAGCTGACCCCGCCCCTGTCAATCTACAGTGGATGACTCTGTCCCTGGAGGACGCTCC	24	2	n	3.8e-06	++++++++++ +
chr15:76671476-76671809	76	TTAGGCCCCGCCCTCGCAAAACGACTCAGCCCAGCCTTCCCGCCCAGCCTTCCCGCCCAGCACCGCGGCTTCCGC	80	2	n	3.8e-06	+++++++++ + +
chr15:76671476-76671809	76	TTAGGCCCCGCCCTCGCAAAACGACTCAGCCCAGCCTTCCCGCCCAGCCTTCCCGCCCAGCACCGCGGCTTCCGC	112	2	n	4e-05	+++++++++ ++
chr15:76671476-76671809	151	TCGGGACACCTCGGGCCGGAAGTGTCGCGTTGCCATGGCGAGGATGGGCGCGGGGCCCGCCCCCGTGGCGCCTGG	204	2	n	4.7e-06	+ +++++++++
chr11:95858699-95859415	1	AACGCACAAGCCTCGGGGAATCGCTCTCTTGTACCCAATCAGAGGTCCCCTGGCACCACTTACCCGCCCCCCGGC	32	1	n	1.6e-05	++ +++++++++++
chr11:95858699-95859415	1	AACGCACAAGCCTCGGGGAATCGCTCTCTTGTACCCAATCAGAGGTCCCCTGGCACCACTTACCCGCCCCCCGGC	61	2	n	2.6e-05	++++++++++
chr11:95858699-95859415	76	CCCGTCCGGCCACTTCATTCGCGGCTCACAAAGCAATCCTACCGCGCGTTCTGCACAGCAGCCAATCAGAGGGTA GGGGGCGGGGACTCCGAGGCGCGGTGTGTGCAGCGGTACTCAGACAGGAAAGCCTCGGGATCCTTCGGGTTCTTT	134	1	n	6.8e-08	++++++++++++++
chr11:95858699-95859415	76	CCCGTCCGGCCACTTCATTCGCGGCTCACAAAGCAATCCTACCGCGCGTTCTGCACAGCAGCCAATCAGAGGGTA GGGGGCGGGGACTCCGAGGCGCGGTGTGTGCAGCGGTACTCAGACAGGAAAGCCTCGGGATCCTTCGGGTTCTTT	148	2	y	6.6e-07	+ +++++++++++
chr12:116047533-116047897	76	CATTCGGCCGTGGGTTGGTGCTATCTGATGTCAATCAAGATCAGGAGGGCGGGGCGGGAGTGATGGCAGTCACTT	101	3	n	2.8e-06	+ +++++++++++
chr12:116047533-116047897	76	CATTCGGCCGTGGGTTGGTGCTATCTGATGTCAATCAAGATCAGGAGGGCGGGGCGGGAGTGATGGCAGTCACTT	117	2	y	2.8e-07	++ +++++++++
chr12:116047533-116047897	151	TGCTGGAAAAGTATTGGCTGAGAACCCGCCAATCAAGTTCACAGAGCCTTGACAATATCGCGAGTCCACATCCCG	174	3	n	1.6e-05	+++ + ++++++++
chr9:66834666-66835134	1	AATGCGGGGCGGGGCAGGCCTGCCAGGTACTCCGGGCTCGATCAGAGAAGGGGGCGGAGCAAAGCCCGGGAGGCG GGGCCTCGAGGTGCTCCAAGGCTTTTTTGAGCGGAGGGCGGGACGTACGAGAGGCGGTGCCTTAGGGGCGGTTTC	2	2	y	7.9e-06	+ ++++++++++
chr9:66834666-66835134	1	AATGCGGGGCGGGGCAGGCCTGCCAGGTACTCCGGGCTCGATCAGAGAAGGGGGCGGAGCAAAGCCCGGGAGGCG GGGCCTCGAGGTGCTCCAAGGCTTTTTTGAGCGGAGGGCGGGACGTACGAGAGGCGGTGCCTTAGGGGCGGTTTC	47	2	y	1.9e-07	+ +++++++++ ++
chr9:66834666-66835134	1	AATGCGGGGCGGGGCAGGCCTGCCAGGTACTCCGGGCTCGATCAGAGAAGGGGGCGGAGCAAAGCCCGGGAGGCG GGGCCTCGAGGTGCTCCAAGGCTTTTTTGAGCGGAGGGCGGGACGTACGAGAGGCGGTGCCTTAGGGGCGGTTTC	66	2	y	5.6e-07	++++++++++++
chr9:66834666-66835134	1	AATGCGGGGCGGGGCAGGCCTGCCAGGTACTCCGGGCTCGATCAGAGAAGGGGGCGGAGCAAAGCCCGGGAGGCG GGGCCTCGAGGTGCTCCAAGGCTTTTTTGAGCGGAGGGCGGGACGTACGAGAGGCGGTGCCTTAGGGGCGGTTTC	106	2	y	4.8e-07	+ ++ +++++++++
chr9:66834666-66835134	1	AATGCGGGGCGGGGCAGGCCTGCCAGGTACTCCGGGCTCGATCAGAGAAGGGGGCGGAGCAAAGCCCGGGAGGCG GGGCCTCGAGGTGCTCCAAGGCTTTTTTGAGCGGAGGGCGGGACGTACGAGAGGCGGTGCCTTAGGGGCGGTTTC	122	2	y	9.9e-05	+++++++++ ++
chr9:66834666-66835134	151	TGGCCAATCAGAGCCTGGGGGCGGTGCAGGACACAGCCAGTCAGAGCAGAGGGCGGAGCGGCGCTCTAGATGAAG	151	1	n	9.3e-07	+++++++++++++
chr9:66834666-66835134	151	TGGCCAATCAGAGCCTGGGGGCGGTGCAGGACACAGCCAGTCAGAGCAGAGGGCGGAGCGGCGCTCTAGATGAAG	196	2	y	9e-07	+ ++ ++++++ ++
chr9:66834666-66835134	226	TGCCTTGAGATGCTCCGCGGCTTGTTTTTGCAGAGGGCGGGGTGGAGTCGAGGAGGCGGGTCCTCGAGCTGCTCC	255	2	y	1.4e-06	+ ++ ++++++++
chr9:66834666-66835134	226	TGCCTTGAGATGCTCCGCGGCTTGTTTTTGCAGAGGGCGGGGTGGAGTCGAGGAGGCGGGTCCTCGAGCTGCTCC	274	2	y	6.5e-06	+++++++++++ +
chr9:66834666-66835134	301	ACAGCAAGGCAGGACTGGGCGGGGGCGGAGCTCGAAAAACAGAGCCTGTATCGCACAACGGTCAGTCGCAGAGGG	318	2	y	7.6e-07	++ ++++++++ ++
chr10:115362188-115362647	1	GGACCCGCCAGGCCAGCAGGGAGGCCGGCAGCTCCCACCTAGAGGGACCCGGAAGGAGCACAAACGACCGGTGGC CAATGAGCGGCCAGCACCGCGGAgccccgcccctccccgccctcggaccccccccccgagctccgcccccgcacg	72	1	n	1.2e-05	++++++++ ++ ++
chr10:115362188-115362647	1	GGACCCGCCAGGCCAGCAGGGAGGCCGGCAGCTCCCACCTAGAGGGACCCGGAAGGAGCACAAACGACCGGTGGC CAATGAGCGGCCAGCACCGCGGAgccccgcccctccccgccctcggaccccccccccgagctccgcccccgcacg	99	2	n	1.4e-08	++++++++++++++
chr10:115362188-115362647	1	GGACCCGCCAGGCCAGCAGGGAGGCCGGCAGCTCCCACCTAGAGGGACCCGGAAGGAGCACAAACGACCGGTGGC CAATGAGCGGCCAGCACCGCGGAgccccgcccctccccgccctcggaccccccccccgagctccgcccccgcacg	135	2	n	7.9e-06	++ ++++++++ +
chr10:115362188-115362647	151	gcgcgctccgccccCTGGGCCCCTGCTCCAAGTCTGCCCCAGCTCCACCTCTGCCGTACGCTGCCCGGGCAAGCG	155	2	n	7.6e-07	++ +++++++++
chr10:115362188-115362647	151	gcgcgctccgccccCTGGGCCCCTGCTCCAAGTCTGCCCCAGCTCCACCTCTGCCGTACGCTGCCCGGGCAAGCG	192	2	n	3.8e-05	++ ++ +++++ ++
chr10:115362188-115362647	226	AACCAAGGCTGGGAACAGCGCGGGCGAGCGCCTTTACGTCCCCACCCCGCTGCCCCGGGAGTCGCTCTGGTCTCT	264	2	n	8.4e-05	++++ ++++ +
chr5:105876408-105876724	1	AGGGTCAGGACCCAGGAGCCTGACAACTGCCTCGCTTCCCGCCCCCCTCGCGAGACCCGCCCACCACCCCGCGTC GGCCAATCGGAGGCGGTGCTGCGACGACTGGCAGGCCCGCCCGACCCCGCCCCCAGCCTCGCTGTGGCCTGCGGC	36	2	n	1.4e-06	+++++++++++ +
chr5:105876408-105876724	1	AGGGTCAGGACCCAGGAGCCTGACAACTGCCTCGCTTCCCGCCCCCCTCGCGAGACCCGCCCACCACCCCGCGTC GGCCAATCGGAGGCGGTGCTGCGACGACTGGCAGGCCCGCCCGACCCCGCCCCCAGCCTCGCTGTGGCCTGCGGC	54	2	n	8.8e-06	+ ++++++++++ +
chr5:105876408-105876724	1	AGGGTCAGGACCCAGGAGCCTGACAACTGCCTCGCTTCCCGCCCCCCTCGCGAGACCCGCCCACCACCCCGCGTC GGCCAATCGGAGGCGGTGCTGCGACGACTGGCAGGCCCGCCCGACCCCGCCCCCAGCCTCGCTGTGGCCTGCGGC	75	1	n	3.7e-06	++++++++++++++
chr5:105876408-105876724	1	AGGGTCAGGACCCAGGAGCCTGACAACTGCCTCGCTTCCCGCCCCCCTCGCGAGACCCGCCCACCACCCCGCGTC GGCCAATCGGAGGCGGTGCTGCGACGACTGGCAGGCCCGCCCGACCCCGCCCCCAGCCTCGCTGTGGCCTGCGGC	98	3	y	7.2e-05	+++++ +++++
chr5:105876408-105876724	1	AGGGTCAGGACCCAGGAGCCTGACAACTGCCTCGCTTCCCGCCCCCCTCGCGAGACCCGCCCACCACCCCGCGTC GGCCAATCGGAGGCGGTGCTGCGACGACTGGCAGGCCCGCCCGACCCCGCCCCCAGCCTCGCTGTGGCCTGCGGC	119	2	n	1.4e-06	++++++++++ +
chr5:105876408-105876724	226	GGGCCACAGCGAGCGCAGCGCGGAGACCGTCAGCCCCGCGGCGTCGAGCATGGACTTCGAGGACGGTGAGCGGCG CGCGgggcgggccgcc	300	2	y	1.4e-05	+ + ++++++++ +
chr1:120121016-120121345	1	CACAGAGCGCACCAGCTAGCGCCTTTAAAAGCACAACCCCGGCGTTCCAACTGAGCTCGGGCGAGCGGCAGCAGC CAATCAGAAGTCGGATCTGCTTTCGGGGGCGTGTCCATCCTAGCGGAGCGCTCCAACCCTTCCCGGACCCAAGAG	72	1	n	1.7e-08	++++++++++++++
chr1:120121016-120121345	151	GGAGTTTATTGCGCACGCGCGGGGAGGAGCCGCGGGGCACGTTGGGAGCAGGTGGGACGCGTTTCGTTTTTTTTT	195	2	y	7.1e-05	++++ +++ +++++
chr17:24251249-24251758	76	CACTGCCGCTTTAGACCGCTCTCAAGCGCGCCCGCGCCTGGGGCAAGTGCACGGAGCGCCTCACGCAGGCGCGGG CCCCACCCCCGCCCCGTTTTCAAACGCGCCGGGAGCTCCTACTGGTAGGACCACAGAGTTACGCCCCCCAGATCA	150	2	n	3e-06	+++++ +++++ ++
chr17:24251249-24251758	226	CTAGCCTCTCCTGCCCCGCAGGCTCTGGGCATTTGTGATTGGCTACACCAGGACGCGAATTCAAACGCTGGCTGT CTATTGGCTTATCGCTCGTGGTTGACCCGCCTTCTCCGCTGGGCGGGGGACGGAGGAGTTCAGCTGGCGCCGGCG	257	1	y	3.7e-07	++ ++++++++++
chr17:24251249-24251758	226	CTAGCCTCTCCTGCCCCGCAGGCTCTGGGCATTTGTGATTGGCTACACCAGGACGCGAATTCAAACGCTGGCTGT CTATTGGCTTATCGCTCGTGGTTGACCCGCCTTCTCCGCTGGGCGGGGGACGGAGGAGTTCAGCTGGCGCCGGCG	297	1	y	3.9e-05	++ + +++++++
chr17:24251249-24251758	226	CTAGCCTCTCCTGCCCCGCAGGCTCTGGGCATTTGTGATTGGCTACACCAGGACGCGAATTCAAACGCTGGCTGT CTATTGGCTTATCGCTCGTGGTTGACCCGCCTTCTCCGCTGGGCGGGGGACGGAGGAGTTCAGCTGGCGCCGGCG	324	2	n	7.2e-06	+ +++++++ ++++
chr17:24251249-24251758	451	TTGGTCGTGGCTTACTACCTGTCCCTCCCACGCGAGCTTCCGGCCGAGGAGACTGCATT	467	3	n	7.7e-05	+++++++ ++ +
chr14:21075834-21076341	226	GCCCTGGGGGCGGCGCTACAGCGGACCGACGGGGGCGGGGCGTCCGCCCTCCTTTGGCCGCAGCCAATCAGCGGG	253	2	y	1.3e-07	+ +++++++++++
chr14:21075834-21076341	226	GCCCTGGGGGCGGCGCTACAGCGGACCGACGGGGGCGGGGCGTCCGCCCTCCTTTGGCCGCAGCCAATCAGCGGG	286	1	n	1.1e-06	+++++++++++ ++
chr16:17891464-17892013	226	GCCCGCGCCACCCCGCCTCCGGCCCGCACTAACCAATGAACGCCGAGCTGGGCGGGGGGTGGGGTGGCGGAGGGA	235	2	n	7.2e-06	++++++++++ +
chr16:17891464-17892013	226	GCCCGCGCCACCCCGCCTCCGGCCCGCACTAACCAATGAACGCCGAGCTGGGCGGGGGGTGGGGTGGCGGAGGGA	255	1	n	9.3e-06	++++++++ + +
chr16:17891464-17892013	226	GCCCGCGCCACCCCGCCTCCGGCCCGCACTAACCAATGAACGCCGAGCTGGGCGGGGGGTGGGGTGGCGGAGGGA	277	2	y	1.3e-05	+ ++++++ ++++
chr16:17891464-17892013	301	GGTAGGACCCGAGCTCCAGACGCGGGGCGGGGCATGAGCACGAGAGGCCTAGGGAATGAGCGAGTGGGCGGGGCC	320	2	y	5.9e-06	+ ++++++++++
chr16:17891464-17892013	301	GGTAGGACCCGAGCTCCAGACGCGGGGCGGGGCATGAGCACGAGAGGCCTAGGGAATGAGCGAGTGGGCGGGGCC	361	2	y	4.9e-08	+++++++++++++
chr16:17891464-17892013	376	AAGGGCGGGGCTAGCAGGAAATGAGGCGTGCCATTGGCTGAACCGAGAGGTGGGACGCAGCCTTGGCAGCGAGGT	402	1	y	8e-05	+ + + ++++++++
chr16:17891464-17892013	376	AAGGGCGGGGCTAGCAGGAAATGAGGCGTGCCATTGGCTGAACCGAGAGGTGGGACGCAGCCTTGGCAGCGAGGT	418	2	y	2.8e-05	++++++ +++++
chr10:25359728-25360043	1	GGCTTTGGCCGTGGGGCGTGGCCTGCCCGCGGGGGTTTCCGCGCCCGGGGCGTGCCGGGCGGGGGACGAGGGCGG GGCTTCCGCCAGGAGGGGGCGGGGCTTGCGCGGAGAGTTCTCTGACGGCCCCAGTCAGGGAATTTCAATTTGAAA	65	2	y	4.8e-07	+ + +++++++++
chr10:25359728-25360043	1	GGCTTTGGCCGTGGGGCGTGGCCTGCCCGCGGGGGTTTCCGCGCCCGGGGCGTGCCGGGCGGGGGACGAGGGCGG GGCTTCCGCCAGGAGGGGGCGGGGCTTGCGCGGAGAGTTCTCTGACGGCCCCAGTCAGGGAATTTCAATTTGAAA	87	2	y	1.1e-09	++++++++++++++
chr10:25359728-25360043	151	CCCAGAGGAGGGTGGAGGCGGCGGGTGCGGAGGGCCGGCGGCGTCCGAGGCTGGAACGGGACGCGTTCCCGGGGC	155	2	y	9.3e-05	+ ++ +++ ++ +
chr10:25359728-25360043	226	GAGCAAGCTCGAGAGGGGCGGTGTCCGGGTAAGGAGGCGAGCGGGCTGCGGAGTGGCGGGCGGGGTCCTGACACG CTGCAGGCGGGAAGC	236	2	y	8.4e-05	+ +++++++++ +
chr10:25359728-25360043	226	GAGCAAGCTCGAGAGGGGCGGTGTCCGGGTAAGGAGGCGAGCGGGCTGCGGAGTGGCGGGCGGGGTCCTGACACG CTGCAGGCGGGAAGC	278	2	y	3.5e-05	+ ++ ++++++++
chr10:25359728-25360043	226	GAGCAAGCTCGAGAGGGGCGGTGTCCGGGTAAGGAGGCGAGCGGGCTGCGGAGTGGCGGGCGGGGTCCTGACACG CTGCAGGCGGGAAGC	300	2	y	9.3e-05	+ + ++++++++
chr12:85455172-85455659	76	CAGTCATGACAACAGGCCCCGCCCACCAGACCTCCAGCCCAGCTGACAACACGTGATGGCGACGCTCCTCCGCCC CTGGCGCAGAGGGAGGGCGGGGAGGCGAGGAGGAGGAGGAGGAGGGAGGGATGACGTTTGCTCTGTCGTCTCCAT	91	2	n	5.6e-07	++++++++++++
chr12:85455172-85455659	76	CAGTCATGACAACAGGCCCCGCCCACCAGACCTCCAGCCCAGCTGACAACACGTGATGGCGACGCTCCTCCGCCC CTGGCGCAGAGGGAGGGCGGGGAGGCGAGGAGGAGGAGGAGGAGGGAGGGATGACGTTTGCTCTGTCGTCTCCAT	142	2	n	3.8e-05	+ ++++++++ +
chr12:85455172-85455659	76	CAGTCATGACAACAGGCCCCGCCCACCAGACCTCCAGCCCAGCTGACAACACGTGATGGCGACGCTCCTCCGCCC CTGGCGCAGAGGGAGGGCGGGGAGGCGAGGAGGAGGAGGAGGAGGGAGGGATGACGTTTGCTCTGTCGTCTCCAT	160	2	y	2.6e-06	+++ ++++++++
chr12:85455172-85455659	301	TGCCCAACACAGGACCCCGGCAACAGGCTTCTGATTGGTCGGAGGCTAGCAGGGGCGGAGCTTCGGCTCCCGCCC GCTCTGCCCGTGTTGCTGTTTTGGTTGTTGTCTCCCAGCTGTTTATTTCTGTAACAGATCTTGGAGGCTGCGGTC	328	1	y	3.7e-07	++++++++++++++
chr12:85455172-85455659	301	TGCCCAACACAGGACCCCGGCAACAGGCTTCTGATTGGTCGGAGGCTAGCAGGGGCGGAGCTTCGGCTCCCGCCC GCTCTGCCCGTGTTGCTGTTTTGGTTGTTGTCTCCCAGCTGTTTATTTCTGTAACAGATCTTGGAGGCTGCGGTC	348	2	y	4.7e-06	+ ++++++++ ++
chr12:85455172-85455659	301	TGCCCAACACAGGACCCCGGCAACAGGCTTCTGATTGGTCGGAGGCTAGCAGGGGCGGAGCTTCGGCTCCCGCCC GCTCTGCCCGTGTTGCTGTTTTGGTTGTTGTCTCCCAGCTGTTTATTTCTGTAACAGATCTTGGAGGCTGCGGTC	367	2	n	8.4e-05	++++++++ +++
chr2:30066180-30066624	76	GGGGCAGGACCATGCGTCGCTGAGCCGCTTCctcccgcctctcgtccaggccccagtgtccccaccgccgccgcc	107	2	n	4.3e-05	+++++++++++
chr2:30066180-30066624	151	gccacccgccacggccccgccccctgccccgcggccgcGGCCAATCGCTGTACGGCGCGAGCCTCTCCGGCCGGG GGCGGGACTTGCGCAGGCCCGGCGCGCCTGCGCTCTGCGGCCTGCCCCTCGCCGggaagaggaggaggtggtggt	164	2	n	7.9e-09	++++++++++++ +
chr2:30066180-30066624	151	gccacccgccacggccccgccccctgccccgcggccgcGGCCAATCGCTGTACGGCGCGAGCCTCTCCGGCCGGG GGCGGGACTTGCGCAGGCCCGGCGCGCCTGCGCTCTGCGGCCTGCCCCTCGCCGggaagaggaggaggtggtggt	188	1	n	9.1e-05	++++++++++ +
chr2:30066180-30066624	151	gccacccgccacggccccgccccctgccccgcggccgcGGCCAATCGCTGTACGGCGCGAGCCTCTCCGGCCGGG GGCGGGACTTGCGCAGGCCCGGCGCGCCTGCGCTCTGCGGCCTGCCCCTCGCCGggaagaggaggaggtggtggt	220	2	y	6.6e-07	+ +++++++++++
chr2:30066180-30066624	301	ggaggaggtggaggaggaggaggaggCGGCTCAGGGCAATCCAGAAGCGAGCCGGAGCGCGGGGCGCGAGTCGAG	301	2	y	7.1e-05	++++++++ ++ +
chr2:30066180-30066624	376	GAGCCCAGCCGAGCCGCCGCCGCCTCCCCGCCTTCAGCGAGAGCCCCGGCCGGGGGCTCGCCACAACGC	400	2	n	7.9e-06	++++++++ + +
chr11:4849417-4849854	1	CGGGAAGCGTCCTCTACCAACCCCCACCTCAGCGACCTGCCGGATCCCCGCCCCGCCCCGCCCTCCGGACTCCCA	55	2	n	4e-07	+++++++++ ++
chr11:4849417-4849854	76	CTACGCTACTCAGCGACTCACCCTAACACTTTTTTCTCTAAGATACTGTGATTGGCAGGAACGCCAAAGGAAGCG	122	3	y	8.4e-06	+++++++ ++++
chr11:4849417-4849854	151	GGACTTCCGCTTCGTCCCGCCTCCTGGAGGCCTACTCCACCAATTGAAAGTTGCACTGAACGAGGGCCGCCGGTC	164	2	n	1e-06	++++++++++++
chr19:3575687-3576352	1	GGTTCACCGACACCATCAGCGAAGCGCCCAAAATGGCGGACGTATCAAGCAGGCCTTGAGTTACCCCCGCCCTCC CTCCGGCCGCCCCGCAGCCAATCACAGGATAGACCCCGCCCCTTCACACGGATCATTGGCTTGTCTCTCCCGCCC CCCACAACCTATTGGACCGCCCAGCGGTTCCCTCGACTCCACTTCGATTGGCTTTGAGGTCTTGTCAGTCAAACG	64	2	n	8.8e-06	++++++++ +++
chr19:3575687-3576352	1	GGTTCACCGACACCATCAGCGAAGCGCCCAAAATGGCGGACGTATCAAGCAGGCCTTGAGTTACCCCCGCCCTCC CTCCGGCCGCCCCGCAGCCAATCACAGGATAGACCCCGCCCCTTCACACGGATCATTGGCTTGTCTCTCCCGCCC CCCACAACCTATTGGACCGCCCAGCGGTTCCCTCGACTCCACTTCGATTGGCTTTGAGGTCTTGTCAGTCAAACG	90	1	n	6.6e-07	++++++++++ +++
chr19:3575687-3576352	1	GGTTCACCGACACCATCAGCGAAGCGCCCAAAATGGCGGACGTATCAAGCAGGCCTTGAGTTACCCCCGCCCTCC CTCCGGCCGCCCCGCAGCCAATCACAGGATAGACCCCGCCCCTTCACACGGATCATTGGCTTGTCTCTCCCGCCC CCCACAACCTATTGGACCGCCCAGCGGTTCCCTCGACTCCACTTCGATTGGCTTTGAGGTCTTGTCAGTCAAACG	108	2	n	5.3e-06	++++++++++++
chr19:3575687-3576352	1	GGTTCACCGACACCATCAGCGAAGCGCCCAAAATGGCGGACGTATCAAGCAGGCCTTGAGTTACCCCCGCCCTCC CTCCGGCCGCCCCGCAGCCAATCACAGGATAGACCCCGCCCCTTCACACGGATCATTGGCTTGTCTCTCCCGCCC CCCACAACCTATTGGACCGCCCAGCGGTTCCCTCGACTCCACTTCGATTGGCTTTGAGGTCTTGTCAGTCAAACG	142	2	n	8.8e-06	+++++++++++ +
chr19:3575687-3576352	1	GGTTCACCGACACCATCAGCGAAGCGCCCAAAATGGCGGACGTATCAAGCAGGCCTTGAGTTACCCCCGCCCTCC CTCCGGCCGCCCCGCAGCCAATCACAGGATAGACCCCGCCCCTTCACACGGATCATTGGCTTGTCTCTCCCGCCC CCCACAACCTATTGGACCGCCCAGCGGTTCCCTCGACTCCACTTCGATTGGCTTTGAGGTCTTGTCAGTCAAACG	191	1	y	1.6e-05	++ +++++++++
chr19:3575687-3576352	1	GGTTCACCGACACCATCAGCGAAGCGCCCAAAATGGCGGACGTATCAAGCAGGCCTTGAGTTACCCCCGCCCTCC CTCCGGCCGCCCCGCAGCCAATCACAGGATAGACCCCGCCCCTTCACACGGATCATTGGCTTGTCTCTCCCGCCC CCCACAACCTATTGGACCGCCCAGCGGTTCCCTCGACTCCACTTCGATTGGCTTTGAGGTCTTGTCAGTCAAACG	210	3	n	1.1e-05	+ ++++++++++
chr11:116198719-116199247	76	ACCAGGCCCTATGAGCGGAGCGAGACAgccctcggccccgccccctcgagccgtccccgccccgtccccgccgcc	110	2	n	7.9e-09	+++++++++++++
chr11:116198719-116199247	76	ACCAGGCCCTATGAGCGGAGCGAGACAgccctcggccccgccccctcgagccgtccccgccccgtccccgccgcc	129	2	n	4.7e-06	+++++++++ +++
chr11:116198719-116199247	376	GCGCAACCGATTGGCCAGGGCCTTGAGGGGCGGGATTGCGCCTGCGCTGTGGGACTCACCTCCTTTCAGGCTAGG	379	1	y	7.5e-05	+ +++++++++++
chr11:116198719-116199247	376	GCGCAACCGATTGGCCAGGGCCTTGAGGGGCGGGATTGCGCCTGCGCTGTGGGACTCACCTCCTTTCAGGCTAGG	398	2	y	2.8e-05	+++++++++++
chr9:54586297-54586649	1	CGCTCCGCGCGTCATCAAAAGATGAAGGCGGTGATTGGTCAGCTAGCGGCAGCTGTGCAGCGGGGTCCGGAGCGG	28	1	y	1.4e-05	+ ++++++++++
chr9:54586297-54586649	76	GGCGGTGAGCGATCGAGAGACCCGAGCTAGGGGCGGGGCCACACGGAGCCTCGGGGCGGGGCCGTGAGGGGCGGG CTTGGGAAGAGGGCTATGCGCATGCGCCCTGGTGTTGCCGCTGTCGCCGCGGTGAGGGAAGTGGACGCGATGGCC	101	2	y	1.9e-07	+ +++++++++++
chr9:54586297-54586649	76	GGCGGTGAGCGATCGAGAGACCCGAGCTAGGGGCGGGGCCACACGGAGCCTCGGGGCGGGGCCGTGAGGGGCGGG CTTGGGAAGAGGGCTATGCGCATGCGCCCTGGTGTTGCCGCTGTCGCCGCGGTGAGGGAAGTGGACGCGATGGCC	124	2	y	6.5e-06	++++++++++
chr9:54586297-54586649	76	GGCGGTGAGCGATCGAGAGACCCGAGCTAGGGGCGGGGCCACACGGAGCCTCGGGGCGGGGCCGTGAGGGGCGGG CTTGGGAAGAGGGCTATGCGCATGCGCCCTGGTGTTGCCGCTGTCGCCGCGGTGAGGGAAGTGGACGCGATGGCC	139	2	y	1.5e-05	+ ++++++++++
chr9:22156665-22157080	1	TGCTCTCAGAGTCTTTCTGGCCTCACCCGTCAATCAAGACCACGGGGGCGGAGCCTGAGCCTGGGAGCGAAGGCA	25	3	n	1.5e-06	+++ ++++++++++
chr9:22156665-22157080	1	TGCTCTCAGAGTCTTTCTGGCCTCACCCGTCAATCAAGACCACGGGGGCGGAGCCTGAGCCTGGGAGCGAAGGCA	41	2	y	3e-06	++++++++ ++
chr9:22156665-22157080	76	AGGTGAACTGTCCAATGAGCACGCGCGGACCGGCTCCATCGCGGGATCTGGGTTCCTCACCCCGCCCCTGCAGGG	84	1	n	3.9e-05	++ +++++ ++ +
chr9:22156665-22157080	76	AGGTGAACTGTCCAATGAGCACGCGCGGACCGGCTCCATCGCGGGATCTGGGTTCCTCACCCCGCCCCTGCAGGG	134	2	n	1.6e-05	++++++++++ +
chr9:22156665-22157080	151	ATTTGATTGGGCGGCTGGCCGGGCTGTCCCGCCTTCGTGGGGCGGTGACTGTCACCGCCAGGCGCCGAAGGGACC	176	2	n	7.9e-06	+++++++++ +
chr9:22156665-22157080	226	GGACTCCTACAGGCCTGCAAACGGTGAGTTGAGGGTCTCGAAATACGAGCGGAGGAGCTGTTGAAACCGGCTGGG GCGGGACTCGCGCCAGCTTGGCGTCTGCGCCATGGACGCCGCCGACTCCGTTTGTCTGGCTGGTTCGTTTTCGGT	294	2	y	4.2e-06	++ ++++++++++
chr18:77047273-77047481	1	CGGACCTGTGCCTGCTGCAAATCGGACGCTTAACCAGCCCGCCCCCTTCGGGATTGGCCAGAGCCCAGACATGCC AACCAATCATCGGCCACAGACGGATTCTTTAACGCGTCAATCAAGGTCACACTAAGCGTTTGATCCAGAGAGTCT	36	2	n	4.2e-06	++++++++++ +
chr18:77047273-77047481	1	CGGACCTGTGCCTGCTGCAAATCGGACGCTTAACCAGCCCGCCCCCTTCGGGATTGGCCAGAGCCCAGACATGCC AACCAATCATCGGCCACAGACGGATTCTTTAACGCGTCAATCAAGGTCACACTAAGCGTTTGATCCAGAGAGTCT	75	1	n	9.3e-06	++++++++++ ++
chr18:77047273-77047481	1	CGGACCTGTGCCTGCTGCAAATCGGACGCTTAACCAGCCCGCCCCCTTCGGGATTGGCCAGAGCCCAGACATGCC AACCAATCATCGGCCACAGACGGATTCTTTAACGCGTCAATCAAGGTCACACTAAGCGTTTGATCCAGAGAGTCT	107	3	n	3.9e-05	++ ++++++++++
chr17:24804239-24804456	1	AGCGCTGGGGGCGGAGTCAGTGGGGGCGCGGTCAGTAGGGGGCGGAGGGGGCGGGGCTCGAGCTAACGGTCGGGG	4	2	y	7.2e-06	+ ++++++++ +
chr17:24804239-24804456	1	AGCGCTGGGGGCGGAGTCAGTGGGGGCGCGGTCAGTAGGGGGCGGAGGGGGCGGGGCTCGAGCTAACGGTCGGGG	44	2	y	1.1e-09	++++++++++++++
chr10:83534116-83534281	1	ACGGCCCCGCCCCCTCGAATGGCAGGTCCCGCCCCTCACCGCTGGCAGAGCTCCTGCCCCTAAGCACACGTGACC	4	2	n	7.9e-09	+++++++++++++
chr10:83534116-83534281	1	ACGGCCCCGCCCCCTCGAATGGCAGGTCCCGCCCCTCACCGCTGGCAGAGCTCCTGCCCCTAAGCACACGTGACC	26	2	n	5.6e-07	++++++++++++ +
chr10:83534116-83534281	76	TGGTGCAGGTCTAGGGAATGAATCGGTGCCTAACCCAAGGGCTTGCTGGACTCCGCCTCTGCTCCATGGATAGCC	125	2	n	4.3e-05	+ ++++++++ +
chr15:98533975-98534584	1	GGCACGCCCCGCCCCCACGCCCCGGCTCGCCGCCTTTGTCCCTGGCCGCCTCAGCGCTCACAGCCCCGACCCGAG	6	2	n	6.4e-08	+++++++++++ +
chr15:98533975-98534584	301	TGGCTGCTCCGCCTGCTCGGAACGCGACCCTAGACGCTGATTGGTTGCTGCGCTGAGGGTGCTGTGCTCCTATTG GTCAGAACTAACACTAGCCTGTGGAGGGCGGGACAGTGAGAGACTCCACAACGGGAGTGGCTGAAGTGAAGTGTC	306	2	n	3.5e-05	++ ++++++ +++
chr15:98533975-98534584	301	TGGCTGCTCCGCCTGCTCGGAACGCGACCCTAGACGCTGATTGGTTGCTGCGCTGAGGGTGCTGTGCTCCTATTG GTCAGAACTAACACTAGCCTGTGGAGGGCGGGACAGTGAGAGACTCCACAACGGGAGTGGCTGAAGTGAAGTGTC	334	1	y	3.7e-06	+ +++++++++++
chr15:98533975-98534584	301	TGGCTGCTCCGCCTGCTCGGAACGCGACCCTAGACGCTGATTGGTTGCTGCGCTGAGGGTGCTGTGCTCCTATTG GTCAGAACTAACACTAGCCTGTGGAGGGCGGGACAGTGAGAGACTCCACAACGGGAGTGGCTGAAGTGAAGTGTC	366	1	y	1.3e-05	++++ ++++++++
chr15:98533975-98534584	301	TGGCTGCTCCGCCTGCTCGGAACGCGACCCTAGACGCTGATTGGTTGCTGCGCTGAGGGTGCTGTGCTCCTATTG GTCAGAACTAACACTAGCCTGTGGAGGGCGGGACAGTGAGAGACTCCACAACGGGAGTGGCTGAAGTGAAGTGTC	396	2	y	7.6e-07	+ ++ +++++++++
chr15:98533975-98534584	451	TGTCAGAAACTCGGCCGGTGAGTGGGCCGTCGGAAAGGCGGGCCACCGCCAGTCGCCGGATTCGGATATTTTTCC	481	2	y	1.1e-05	+++ +++++++ +
chr15:100422941-100423358	76	CGGCGACCCAGTCAACCTCCTGCCCTCCCGTGATTGGCCGGCCGGGCGGGAGCCCCCCTCTCCTGATTGGCTGGA	102	1	y	3.9e-05	++ ++++++++++
chr15:100422941-100423358	76	CGGCGACCCAGTCAACCTCCTGCCCTCCCGTGATTGGCCGGCCGGGCGGGAGCCCCCCTCTCCTGATTGGCTGGA	135	1	y	4.8e-06	++ +++++++++++
chr15:100422941-100423358	151	CTCCTGCAGCTGCGGGATTGCGTGGCCGGCGGACCGGGAACGGAGGCTCCGCCCATCCGAGCTGCCTGGGGGCGG GGCCTGAGCGGGGGCGGGGCTGATCCGGAGGCGTGATTCCGCCGGGCGCGCCACGGTCCTCGCAGTTCAAACCTT	196	2	n	2.3e-06	++ ++++++++++
chr15:100422941-100423358	151	CTCCTGCAGCTGCGGGATTGCGTGGCCGGCGGACCGGGAACGGAGGCTCCGCCCATCCGAGCTGCCTGGGGGCGG GGCCTGAGCGGGGGCGGGGCTGATCCGGAGGCGTGATTCCGCCGGGCGCGCCACGGTCCTCGCAGTTCAAACCTT	215	2	y	2.3e-07	+++++++++++
chr15:100422941-100423358	151	CTCCTGCAGCTGCGGGATTGCGTGGCCGGCGGACCGGGAACGGAGGCTCCGCCCATCCGAGCTGCCTGGGGGCGG GGCCTGAGCGGGGGCGGGGCTGATCCGGAGGCGTGATTCCGCCGGGCGCGCCACGGTCCTCGCAGTTCAAACCTT	232	2	y	3.4e-07	+ +++++++++++
chr14:67715682-67716296	76	GGGTGGGTACAGTAGAAGGGGCAAAAGCCTAGCGAGGAGCTGATTGGTCTATGGGACTTCGGCGTCCCGCCTCTT CCTTAGACCCAGTCTCTTTATGCAAATGAGCACTCCTACACTCCAACGTGCGCCTGCTCAGTAACGCTTAGAGCG	112	1	y	5.3e-05	++++++++++
chr14:67715682-67716296	76	GGGTGGGTACAGTAGAAGGGGCAAAAGCCTAGCGAGGAGCTGATTGGTCTATGGGACTTCGGCGTCCCGCCTCTT CCTTAGACCCAGTCTCTTTATGCAAATGAGCACTCCTACACTCCAACGTGCGCCTGCTCAGTAACGCTTAGAGCG	139	2	n	3.4e-07	++++++++++++++
chr14:67715682-67716296	301	TCCACCGCCGTCTAGTGTTACTCTGAGCCCACCCCCCAGCCGGACTCTGATTGGCTAAATACTGGCCGGTACAGC	326	2	n	8.4e-05	+++ ++++++
chr14:67715682-67716296	301	TCCACCGCCGTCTAGTGTTACTCTGAGCCCACCCCCCAGCCGGACTCTGATTGGCTAAATACTGGCCGGTACAGC	344	1	y	3.7e-07	+++++++++++++
chr14:67715682-67716296	376	GTGTTGATTGGCGCAGCTCAGCGTCGGTCTGGGCGCGGTTGGGGGGAAGGGCCGCTAGCAGGCTGAGGAGCCTAG GGGCGGGGTGGGAAGGAGGATCGGCCAACCCCGGGGTGTGGGACTGAGGGTGCGTGCGTGAGGAGTGTGGGGCCG	376	1	y	9.1e-05	+ ++++++++
chr14:67715682-67716296	376	GTGTTGATTGGCGCAGCTCAGCGTCGGTCTGGGCGCGGTTGGGGGGAAGGGCCGCTAGCAGGCTGAGGAGCCTAG GGGCGGGGTGGGAAGGAGGATCGGCCAACCCCGGGGTGTGGGACTGAGGGTGCGTGCGTGAGGAGTGTGGGGCCG	446	2	y	5.3e-06	++++++++++
chr14:67715682-67716296	526	ACCAGGAAGGTGGCGAAGGGCGGAGAGTCCGGGTGGGAGGCGGGAGGGGTCTCGCGGGCGCGGAGCGCGGCGGGT	538	2	y	1.4e-05	+ ++ ++++++ +
chr14:67715682-67716296	526	ACCAGGAAGGTGGCGAAGGGCGGAGAGTCCGGGTGGGAGGCGGGAGGGGTCTCGCGGGCGCGGAGCGCGGCGGGT	558	2	y	1.9e-05	+ +++++++++++
[truncated: 7,261 more rows]

## Sheet: MAST_PBX4_ATAC_UniqSeq
Chromosome	Start	End	Width	Strand	Combined p-value of all motif matches within region	E-value
chr4	151044649	151045119	470	both	2.03e-09	2.8e-05
chr11	64978825	64979217	392	both	2.19e-09	3e-05
chr5	73490727	73491203	476	both	4.11e-09	5.6e-05
chr4	44704479	44704751	272	both	5.9e-09	8.1e-05
chr1	168432356	168432673	317	both	6.8e-09	9.3e-05
chr19	14598087	14598659	572	both	7.7e-09	0.00011
chr2	174464035	174464369	334	both	9.77e-09	0.00013
chr9	21760276	21760721	445	both	2.09e-08	0.00029
chr5	110135627	110136033	406	both	2.41e-08	0.00033
chr11	50292155	50292717	562	both	3.17e-08	0.00043
chr1	191396979	191397845	866	both	3.71e-08	0.00051
chr8	84237038	84237485	447	both	4.17e-08	0.00057
chr5	34573355	34573921	566	both	4.71e-08	0.00065
chr17	46751758	46752512	754	both	5.05e-08	0.00069
chr11	23255475	23256103	628	both	5.13e-08	0.0007
chr5	31202000	31202611	611	both	5.53e-08	0.00076
chr12	85824532	85825122	590	both	7.38e-08	0.001
chr13	80885501	80886394	893	both	7.78e-08	0.0011
chr10	95940485	95940897	412	both	7.83e-08	0.0011
chr4	28812950	28813215	265	both	9.15e-08	0.0013
chr6	100287410	100287708	298	both	9.18e-08	0.0013
chr15	78174077	78174575	498	both	9.57e-08	0.0013
chr8	47533403	47533833	430	both	1.08e-07	0.0015
chr10	81600942	81601194	252	both	1.15e-07	0.0016
chr2	161109059	161109434	375	both	1.2e-07	0.0016
chr13	37857749	37858075	326	both	1.21e-07	0.0017
chr4	137862126	137862358	232	both	1.39e-07	0.0019
chr6	146888366	146888698	332	both	1.41e-07	0.0019
chr1	136624659	136625112	453	both	1.71e-07	0.0023
chr4	155812316	155812664	348	both	1.71e-07	0.0023
chr10	60002714	60003356	642	both	1.73e-07	0.0024
chr15	79741391	79742732	1341	both	1.73e-07	0.0024
chr7	102209890	102210677	787	both	1.75e-07	0.0024
chrX	152342414	152342771	357	both	1.89e-07	0.0026
chr15	82345850	82346499	649	both	1.91e-07	0.0026
chr10	81648942	81649228	286	both	2.03e-07	0.0028
chr8	72492630	72493092	462	both	2.06e-07	0.0028
chr12	24831331	24831754	423	both	2.13e-07	0.0029
chr1	131827654	131828172	518	both	2.16e-07	0.003
chr19	41981092	41981759	667	both	2.26e-07	0.0031
chr8	22060454	22060876	422	both	2.44e-07	0.0033
chr6	47813278	47813886	608	both	2.51e-07	0.0034
chr13	44730510	44731419	909	both	2.6e-07	0.0036
chr12	8640766	8641286	520	both	2.82e-07	0.0039
chr4	133479848	133480255	407	both	2.87e-07	0.0039
chr12	84772930	84773450	520	both	2.96e-07	0.0041
chr11	106036654	106037044	390	both	3.03e-07	0.0042
chr17	3557467	3558117	650	both	3.05e-07	0.0042
chr11	49846509	49846998	489	both	3.14e-07	0.0043
chr3	131303147	131303400	253	both	3.36e-07	0.0046
chr11	97744755	97745382	627	both	3.5e-07	0.0048
chr15	81871932	81872629	697	both	3.78e-07	0.0052
chr5	134184405	134184734	329	both	3.99e-07	0.0055
chr8	83972634	83973077	443	both	4.41e-07	0.006
chr5	109556858	109559133	2275	both	4.61e-07	0.0063
chr12	111442385	111442757	372	both	4.62e-07	0.0063
chr14	118136971	118137260	289	both	4.75e-07	0.0065
chr5	105495288	105495484	196	both	4.85e-07	0.0067
chr4	132510420	132510775	355	both	4.97e-07	0.0068
chr7	41632941	41633716	775	both	5.06e-07	0.0069
chr7	78895768	78896100	332	both	5.08e-07	0.007
chr11	96916459	96916886	427	both	5.2e-07	0.0071
chr2	162931147	162932123	976	both	5.32e-07	0.0073
chr5	120588549	120589124	575	both	5.63e-07	0.0077
chr2	18392542	18393012	470	both	5.8e-07	0.008
chr14	55015115	55015604	489	both	5.82e-07	0.008
chr16	31081306	31081631	325	both	5.84e-07	0.008
chr4	151861761	151862673	912	both	5.91e-07	0.0081
chr4	11966319	11966840	521	both	6.15e-07	0.0084
chr11	69059498	69059883	385	both	6.16e-07	0.0084
chr6	83831655	83832150	495	both	6.22e-07	0.0085
chr14	14702779	14703249	470	both	6.63e-07	0.0091
chr2	30981899	30982470	571	both	6.96e-07	0.0095
chr2	144011191	144011688	497	both	7.02e-07	0.0096
chr9	122294363	122294842	479	both	7.2e-07	0.0099
chr2	177840374	177840564	190	both	7.33e-07	0.01
chr9	4376281	4376668	387	both	7.66e-07	0.011
chr8	75033549	75034293	744	both	7.8e-07	0.011
chr8	117475100	117476156	1056	both	7.83e-07	0.011
chr5	73256583	73257019	436	both	7.86e-07	0.011
chr7	90475938	90476392	454	both	8.54e-07	0.012
chr14	63177863	63178299	436	both	8.54e-07	0.012
chr1	7397708	7398347	639	both	8.58e-07	0.012
chr4	132533590	132533841	251	both	8.75e-07	0.012
chr5	140830423	140830894	471	both	9.12e-07	0.013
chr4	59581402	59581853	451	both	9.24e-07	0.013
chr9	109875260	109875709	449	both	9.54e-07	0.013
chr11	87108752	87109387	635	both	9.89e-07	0.014
chr5	122502181	122502590	409	both	9.94e-07	0.014
chr5	122820869	122821602	733	both	1.01e-06	0.014
chr17	84957152	84958126	974	both	1.04e-06	0.014
chr11	115276860	115277460	600	both	1.05e-06	0.014
chr15	100761682	100762065	383	both	1.06e-06	0.015
chr8	26158018	26158919	901	both	1.13e-06	0.015
chr2	30474246	30474414	168	both	1.13e-06	0.016
chr9	61370516	61370854	338	both	1.14e-06	0.016
chr4	129542616	129543053	437	both	1.18e-06	0.016
chr7	89404215	89404491	276	both	1.18e-06	0.016
chr11	43681706	43682161	455	both	1.19e-06	0.016
chr16	55895173	55895688	515	both	1.2e-06	0.016
chr5	113735587	113735981	394	both	1.24e-06	0.017
chr4	154160653	154160991	338	both	1.25e-06	0.017
chr18	38992895	38993322	427	both	1.26e-06	0.017
chr18	80151027	80152060	1033	both	1.31e-06	0.018
chr8	69749613	69750194	581	both	1.31e-06	0.018
chr11	115933479	115933789	310	both	1.37e-06	0.019
chr7	143829625	143830336	711	both	1.37e-06	0.019
chr7	45916638	45916994	356	both	1.39e-06	0.019
chr14	45329597	45330034	437	both	1.41e-06	0.019
chr6	87850993	87851361	368	both	1.42e-06	0.019
chr8	69996246	69996858	612	both	1.43e-06	0.02
chr17	17004691	17005201	510	both	1.46e-06	0.02
chr11	23007619	23008564	945	both	1.47e-06	0.02
chr8	76901996	76902271	275	both	1.52e-06	0.021
chr1	184034187	184034566	379	both	1.53e-06	0.021
chr15	82146919	82147425	506	both	1.55e-06	0.021
chr13	91460718	91461290	572	both	1.56e-06	0.021
chr6	37870545	37870964	419	both	1.57e-06	0.022
chr15	82354195	82354601	406	both	1.59e-06	0.022
chr3	96601008	96601209	201	both	1.65e-06	0.023
chr9	113930699	113931260	561	both	1.65e-06	0.023
chr8	46551784	46552176	392	both	1.72e-06	0.024
chr4	8647137	8647782	645	both	1.75e-06	0.024
chr11	60210379	60210697	318	both	1.76e-06	0.024
chr1	52233124	52233611	487	both	1.8e-06	0.025
chr10	75773378	75773702	324	both	1.93e-06	0.026
chr12	108275443	108275781	338	both	1.94e-06	0.027
chr10	128704966	128705298	332	both	1.94e-06	0.027
chr7	73537730	73538201	471	both	1.95e-06	0.027
chr2	150311347	150311591	244	both	1.97e-06	0.027
chr10	80329784	80330223	439	both	1.99e-06	0.027
chr15	85832168	85832411	243	both	1.99e-06	0.027
chrX	7574302	7574887	585	both	1.99e-06	0.027
chr2	122467725	122468083	358	both	2.01e-06	0.028
chr2	177206481	177206682	201	both	2.01e-06	0.028
chr2	160731172	160731399	227	both	2.02e-06	0.028
chr17	55959012	55959605	593	both	2.04e-06	0.028
chr15	99294995	99295367	372	both	2.07e-06	0.028
chr2	177957331	177957534	203	both	2.07e-06	0.028
chr2	140395200	140395578	378	both	2.07e-06	0.028
chr5	96162530	96162771	241	both	2.09e-06	0.029
chr5	33652031	33652879	848	both	2.1e-06	0.029
chr17	56831080	56831517	437	both	2.14e-06	0.029
chr4	134714097	134714307	210	both	2.16e-06	0.03
chr11	4186608	4187001	393	both	2.23e-06	0.031
chr18	73572100	73572848	748	both	2.24e-06	0.031
chr17	31564324	31564984	660	both	2.28e-06	0.031
chr1	59481981	59482296	315	both	2.35e-06	0.032
chr11	96977401	96978188	787	both	2.35e-06	0.032
chr19	21652824	21653333	509	both	2.41e-06	0.033
chr3	104220296	104220762	466	both	2.42e-06	0.033
chr4	140906246	140906406	160	both	2.43e-06	0.033
chr18	67449143	67449603	460	both	2.46e-06	0.034
chr4	119733600	119733950	350	both	2.47e-06	0.034
chr4	149426602	149426976	374	both	2.54e-06	0.035
chr7	41393137	41393639	502	both	2.55e-06	0.035
chr18	33213824	33214211	387	both	2.6e-06	0.036
chr7	19421383	19421619	236	both	2.61e-06	0.036
chr6	34476099	34476447	348	both	2.61e-06	0.036
chrX	140456494	140456789	295	both	2.63e-06	0.036
chr8	69716467	69717314	847	both	2.73e-06	0.037
chr6	88084367	88084673	306	both	2.73e-06	0.037
chr8	117157798	117158112	314	both	2.74e-06	0.037
chr3	97658015	97658429	414	both	2.74e-06	0.038
chr11	96829506	96830365	859	both	2.77e-06	0.038
chr17	6827826	6828276	450	both	2.89e-06	0.04
chr5	124327529	124328280	751	both	2.89e-06	0.04
chr1	191906531	191906911	380	both	2.93e-06	0.04
chr8	57511572	57512079	507	both	2.94e-06	0.04
chr7	18910358	18910752	394	both	2.95e-06	0.04
chr8	4677389	4678816	1427	both	2.97e-06	0.041
chr6	113419305	113419577	272	both	2.98e-06	0.041
chr10	81292591	81293379	788	both	2.99e-06	0.041
chr11	78697403	78697775	372	both	3.01e-06	0.041
chr10	62651210	62651741	531	both	3.07e-06	0.042
chr8	70212259	70212973	714	both	3.14e-06	0.043
chr4	148591301	148591624	323	both	3.19e-06	0.044
chr8	85840663	85841071	408	both	3.24e-06	0.044
chr7	4739696	4740267	571	both	3.24e-06	0.044
chr5	35893216	35893530	314	both	3.25e-06	0.045
chr10	24149186	24149555	369	both	3.28e-06	0.045
chr8	69208957	69209219	262	both	3.28e-06	0.045
chr1	180195946	180196299	353	both	3.32e-06	0.045
chr7	143460977	143461296	319	both	3.32e-06	0.046
chr8	70594121	70594615	494	both	3.34e-06	0.046
chr10	52417343	52417757	414	both	3.34e-06	0.046
chr11	69408680	69409788	1108	both	3.35e-06	0.046
chr8	18846133	18846710	577	both	3.36e-06	0.046
chr15	81926167	81926513	346	both	3.4e-06	0.047
chr5	36988877	36989322	445	both	3.41e-06	0.047
chr5	135744159	135744499	340	both	3.43e-06	0.047
chr17	80290041	80290365	324	both	3.45e-06	0.047
chr6	83121388	83121807	419	both	3.45e-06	0.047
chr11	76846864	76847276	412	both	3.47e-06	0.047
chr11	103966375	103966872	497	both	3.48e-06	0.048
chr11	106084136	106084695	559	both	3.48e-06	0.048
chr3	136669807	136670277	470	both	3.56e-06	0.049
chr12	81781165	81781498	333	both	3.56e-06	0.049
chr4	122955459	122955751	292	both	3.68e-06	0.05
chr1	23256063	23256367	304	both	3.69e-06	0.051
chr9	101034527	101035091	564	both	3.76e-06	0.052
chr13	51644921	51645502	581	both	3.8e-06	0.052
chr5	74092858	74093294	436	both	3.82e-06	0.052
chr2	121448996	121449522	526	both	3.84e-06	0.053
chr7	137410436	137411239	803	both	3.86e-06	0.053
chr4	120666385	120666672	287	both	3.95e-06	0.054
chr12	36042451	36042770	319	both	3.97e-06	0.054
chr17	71551881	71552261	380	both	3.99e-06	0.055
chr11	101278899	101279181	282	both	4.06e-06	0.056
chr19	46152242	46152686	444	both	4.07e-06	0.056
chr3	32708351	32708854	503	both	4.11e-06	0.056
chr5	32863581	32863873	292	both	4.12e-06	0.057
chr3	104511650	104512228	578	both	4.17e-06	0.057
chr2	62664155	62664562	407	both	4.28e-06	0.059
chr14	79587246	79587889	643	both	4.37e-06	0.06
chr12	100724807	100725585	778	both	4.37e-06	0.06
chrX	52912104	52912466	362	both	4.39e-06	0.06
chr8	113634949	113635777	828	both	4.4e-06	0.06
chrX	7841146	7841984	838	both	4.42e-06	0.061
chr14	31830651	31831064	413	both	4.43e-06	0.061
chr15	58594963	58595302	339	both	4.46e-06	0.061
chr17	64600605	64600947	342	both	4.5e-06	0.062
chr4	70534909	70535305	396	both	4.52e-06	0.062
chr15	76710521	76710790	269	both	4.65e-06	0.064
chr4	136309932	136311146	1214	both	4.66e-06	0.064
chr9	118925433	118925645	212	both	4.71e-06	0.065
chr15	81190739	81191143	404	both	4.73e-06	0.065
chr7	44929483	44930105	622	both	4.76e-06	0.065
chr17	24141515	24141909	394	both	4.86e-06	0.067
chr11	21371035	21371508	473	both	5.03e-06	0.069
chr7	67222418	67222724	306	both	5.06e-06	0.069
chr5	33629554	33630017	463	both	5.08e-06	0.07
chr7	24399509	24400108	599	both	5.11e-06	0.07
chr9	21030840	21031086	246	both	5.11e-06	0.07
chr18	9449946	9450511	565	both	5.14e-06	0.07
chr8	129263541	129263762	221	both	5.2e-06	0.071
chr17	29716989	29717265	276	both	5.28e-06	0.072
chr11	69098719	69099018	299	both	5.29e-06	0.072
chr5	109996408	109996660	252	both	5.34e-06	0.073
chr16	4679694	4680017	323	both	5.42e-06	0.074
chr6	146642359	146642794	435	both	5.56e-06	0.076
chr11	98773801	98774232	431	both	5.6e-06	0.077
chr2	132131454	132131677	223	both	5.63e-06	0.077
chr12	71015555	71016150	595	both	5.66e-06	0.078
chr11	115514126	115514691	565	both	5.67e-06	0.078
chr11	79992765	79993317	552	both	5.69e-06	0.078
chr4	119108630	119109364	734	both	5.85e-06	0.08
chrX	71214797	71215169	372	both	5.87e-06	0.08
chr3	95882042	95882611	569	both	5.94e-06	0.081
chr14	16364970	16365879	909	both	6.06e-06	0.083
chr4	45012210	45012943	733	both	6.15e-06	0.084
chr15	99392756	99393151	395	both	6.15e-06	0.084
chr18	3507705	3508110	405	both	6.36e-06	0.087
chr11	69997203	69997466	263	both	6.43e-06	0.088
chr2	181459471	181459816	345	both	6.51e-06	0.089
chr14	21500468	21501375	907	both	6.53e-06	0.09
chr1	52119298	52119635	337	both	6.57e-06	0.09
chr1	57995873	57996141	268	both	6.66e-06	0.091
chr8	46152489	46152615	126	both	6.75e-06	0.092
chr2	118901247	118901590	343	both	6.75e-06	0.093
chr9	57836819	57837156	337	both	6.75e-06	0.093
chr7	45643617	45643845	228	both	6.8e-06	0.093
chr5	113164900	113165358	458	both	6.98e-06	0.096
chr7	100607317	100607916	599	both	6.99e-06	0.096
chr14	52244469	52244800	331	both	7e-06	0.096
chr17	63863769	63864083	314	both	7.02e-06	0.096
chr6	146577406	146578104	698	both	7.12e-06	0.098
chr5	109845003	109845237	234	both	7.16e-06	0.098
chr3	108653795	108654069	274	both	7.17e-06	0.098
chr10	7667478	7667646	168	both	7.18e-06	0.098
chr3	88141979	88142536	557	both	7.31e-06	0.1
chr14	56811729	56812807	1078	both	7.31e-06	0.1
chr8	83594257	83594780	523	both	7.35e-06	0.1
chr19	46573087	46573581	494	both	7.42e-06	0.1
chr1	43933712	43934191	479	both	7.44e-06	0.1
chr5	30921386	30921969	583	both	7.45e-06	0.1
chr7	127273971	127274279	308	both	7.46e-06	0.1
chr10	81320364	81321082	718	both	7.49e-06	0.1
chr5	109866413	109866886	473	both	7.71e-06	0.11
chr8	105278922	105279404	482	both	7.76e-06	0.11
chr8	46617175	46617605	430	both	7.77e-06	0.11
chr11	80080897	80081420	523	both	7.9e-06	0.11
chr4	43656441	43656936	495	both	8.01e-06	0.11
chr9	124282199	124282458	259	both	8.13e-06	0.11
chr9	122805449	122805794	345	both	8.19e-06	0.11
chr1	36709928	36710269	341	both	8.22e-06	0.11
chr9	62122575	62123029	454	both	8.23e-06	0.11
chr2	92008349	92008700	351	both	8.39e-06	0.11
chr6	54816477	54816974	497	both	8.57e-06	0.12
chr5	123132410	123132857	447	both	8.62e-06	0.12
chr14	56885546	56886696	1150	both	8.7e-06	0.12
chr12	113014134	113014561	427	both	8.72e-06	0.12
chr12	76710013	76710399	386	both	8.81e-06	0.12
chr9	21955635	21956245	610	both	8.86e-06	0.12
chr5	120612582	120613546	964	both	8.94e-06	0.12
chr5	110058042	110058347	305	both	9.09e-06	0.12
chrX	140956679	140957032	353	both	9.14e-06	0.13
chr8	84104526	84105208	682	both	9.14e-06	0.13
chr9	106280957	106281535	578	both	9.17e-06	0.13
chr2	156196538	156197195	657	both	9.19e-06	0.13
chr11	23770761	23771563	802	both	9.21e-06	0.13
chr4	3938527	3939038	511	both	9.54e-06	0.13
chr8	91133948	91134451	503	both	9.55e-06	0.13
chr9	22307645	22307959	314	both	9.66e-06	0.13
chr5	125465714	125466065	351	both	9.68e-06	0.13
chr5	135168386	135169053	667	both	9.74e-06	0.13
chr8	69395511	69395641	130	both	9.82e-06	0.13
chr17	25919762	25920671	909	both	9.85e-06	0.13
chr17	33759861	33760812	951	both	9.91e-06	0.14
chr5	93267054	93268314	1260	both	1e-05	0.14
chr6	134640871	134641244	373	both	1.01e-05	0.14
chr5	138441372	138441642	270	both	1.01e-05	0.14
chr17	49029970	49030256	286	both	1.01e-05	0.14
chr6	83867020	83867470	450	both	1.01e-05	0.14
chr19	29361808	29362113	305	both	1.01e-05	0.14
chr12	83487729	83488035	306	both	1.02e-05	0.14
chr13	112800689	112801102	413	both	1.02e-05	0.14
chr10	128303178	128303780	602	both	1.04e-05	0.14
chr9	40800767	40801538	771	both	1.05e-05	0.14
chr1	131527242	131528037	795	both	1.05e-05	0.14
chr17	23564094	23564420	326	both	1.06e-05	0.15
chr10	52382010	52382424	414	both	1.07e-05	0.15
chr5	88764899	88765284	385	both	1.07e-05	0.15
chr8	69625170	69625846	676	both	1.09e-05	0.15
chr2	30364031	30364378	347	both	1.09e-05	0.15
chr12	85280365	85280656	291	both	1.1e-05	0.15
chr14	19823767	19824094	327	both	1.1e-05	0.15
chr9	100545801	100546437	636	both	1.1e-05	0.15
chr2	53191192	53192224	1032	both	1.1e-05	0.15
chr6	124662698	124663246	548	both	1.1e-05	0.15
chr1	128359591	128359927	336	both	1.11e-05	0.15
chr8	70527652	70527882	230	both	1.13e-05	0.15
chr5	150118454	150118784	330	both	1.15e-05	0.16
chr17	23771571	23771908	337	both	1.16e-05	0.16
chr16	96127792	96128298	506	both	1.16e-05	0.16
chr17	64331938	64332458	520	both	1.17e-05	0.16
chr16	4214014	4214395	381	both	1.17e-05	0.16
chr12	118301198	118302478	1280	both	1.17e-05	0.16
chr12	24651081	24652377	1296	both	1.17e-05	0.16
chr15	77842054	77842635	581	both	1.18e-05	0.16
chr15	76671476	76671809	333	both	1.18e-05	0.16
chr11	95858699	95859415	716	both	1.2e-05	0.16
chr12	116047533	116047897	364	both	1.21e-05	0.17
chr9	66834666	66835134	468	both	1.21e-05	0.17
chr10	115362188	115362647	459	both	1.21e-05	0.17
chr5	105876408	105876724	316	both	1.21e-05	0.17
chr1	120121016	120121345	329	both	1.21e-05	0.17
chr17	24251249	24251758	509	both	1.21e-05	0.17
chr14	21075834	21076341	507	both	1.22e-05	0.17
chr16	17891464	17892013	549	both	1.23e-05	0.17
chr10	25359728	25360043	315	both	1.24e-05	0.17
chr12	85455172	85455659	487	both	1.25e-05	0.17
chr2	30066180	30066624	444	both	1.27e-05	0.17
chr11	4849417	4849854	437	both	1.27e-05	0.17
chr19	3575687	3576352	665	both	1.27e-05	0.17
chr11	116198719	116199247	528	both	1.3e-05	0.18
chr9	54586297	54586649	352	both	1.31e-05	0.18
chr9	22156665	22157080	415	both	1.32e-05	0.18
chr18	77047273	77047481	208	both	1.33e-05	0.18
chr17	24804239	24804456	217	both	1.34e-05	0.18
chr10	83534116	83534281	165	both	1.35e-05	0.18
chr15	98533975	98534584	609	both	1.37e-05	0.19
chr15	100422941	100423358	417	both	1.38e-05	0.19
chr14	67715682	67716296	614	both	1.38e-05	0.19
chr19	61140776	61141069	293	both	1.38e-05	0.19
chr4	41760394	41760645	251	both	1.39e-05	0.19
chr10	63023673	63024282	609	both	1.41e-05	0.19
chr18	12128549	12128893	344	both	1.42e-05	0.19
chr6	113237613	113238002	389	both	1.42e-05	0.2
chr17	15564306	15564681	375	both	1.42e-05	0.2
chr11	78328299	78328592	293	both	1.43e-05	0.2
chr17	24886316	24886852	536	both	1.45e-05	0.2
chr1	134415259	134415806	547	both	1.49e-05	0.2
chr7	30534999	30535399	400	both	1.5e-05	0.21
chr3	89411878	89412229	351	both	1.52e-05	0.21
chr15	100461129	100461351	222	both	1.53e-05	0.21
chr10	78009296	78010024	728	both	1.53e-05	0.21
chr7	30552242	30552667	425	both	1.55e-05	0.21
chr19	18631365	18632111	746	both	1.55e-05	0.21
chr13	119690058	119690549	491	both	1.55e-05	0.21
chr11	4096597	4096992	395	both	1.55e-05	0.21
chr16	8470667	8471000	333	both	1.56e-05	0.21
chr6	54681566	54681843	277	both	1.58e-05	0.22
chr4	134704252	134704617	365	both	1.59e-05	0.22
chr15	75748311	75748691	380	both	1.59e-05	0.22
chrX	150813068	150813268	200	both	1.6e-05	0.22
chr4	116720724	116721123	399	both	1.64e-05	0.22
chr7	128740425	128740746	321	both	1.65e-05	0.23
chr17	28800857	28801867	1010	both	1.66e-05	0.23
chr15	79328142	79328561	419	both	1.69e-05	0.23
chr4	138304542	138304977	435	both	1.69e-05	0.23
chr6	70844143	70844682	539	both	1.7e-05	0.23
chr14	115040812	115041068	256	both	1.75e-05	0.24
chr5	123524071	123524705	634	both	1.75e-05	0.24
chr2	68382533	68382733	200	both	1.75e-05	0.24
chr2	73892562	73893132	570	both	1.77e-05	0.24
chr7	35056429	35056886	457	both	1.77e-05	0.24
chr11	32454963	32455517	554	both	1.78e-05	0.24
chr19	10688686	10689236	550	both	1.78e-05	0.24
chr11	55469192	55469821	629	both	1.78e-05	0.24
chr4	109000446	109000937	491	both	1.79e-05	0.25
chr19	4231700	4232104	404	both	1.81e-05	0.25
chr16	8829692	8831181	1489	both	1.81e-05	0.25
chr14	70549426	70549613	187	both	1.84e-05	0.25
chr1	171196282	171196415	133	both	1.85e-05	0.25
chr3	88296759	88297302	543	both	1.85e-05	0.25
chr1	53785012	53785518	506	both	1.88e-05	0.26
chr7	28311981	28312311	330	both	1.91e-05	0.26
chr2	128817816	128818490	674	both	1.91e-05	0.26
chr18	62189255	62189514	259	both	1.93e-05	0.27
chr8	94214370	94214766	396	both	1.93e-05	0.27
chr19	30030350	30030624	274	both	1.94e-05	0.27
chr5	124439633	124440069	436	both	1.99e-05	0.27
chr11	120086805	120087168	363	both	2e-05	0.27
chr3	54692588	54692998	410	both	2.02e-05	0.28
chr9	61946639	61947058	419	both	2.03e-05	0.28
chr8	84893761	84894133	372	both	2.04e-05	0.28
chr7	123369850	123370385	535	both	2.04e-05	0.28
chr2	84715097	84715872	775	both	2.05e-05	0.28
chr14	54893791	54894270	479	both	2.08e-05	0.28
chr7	64392207	64392878	671	both	2.08e-05	0.28
chr11	117832186	117832722	536	both	2.08e-05	0.29
chr7	16781185	16781501	316	both	2.08e-05	0.29
chr8	116993278	116993828	550	both	2.12e-05	0.29
chr6	8509166	8509554	388	both	2.12e-05	0.29
chr7	48788853	48789185	332	both	2.13e-05	0.29
chr14	31206658	31206997	339	both	2.16e-05	0.3
chr7	25221288	25221564	276	both	2.18e-05	0.3
chr11	84179412	84179881	469	both	2.19e-05	0.3
chr8	119778360	119778690	330	both	2.21e-05	0.3
chr5	25529548	25530043	495	both	2.25e-05	0.31
chr11	119053414	119053605	191	both	2.28e-05	0.31
chr6	47594986	47595381	395	both	2.29e-05	0.31
chr10	53629392	53630346	954	both	2.31e-05	0.32
chr11	79704414	79704775	361	both	2.32e-05	0.32
chr4	83324177	83324522	345	both	2.32e-05	0.32
chr8	4165955	4166658	703	both	2.35e-05	0.32
chr13	41605537	41605938	401	both	2.35e-05	0.32
chr4	59783800	59784127	327	both	2.36e-05	0.32
chr10	80226362	80226796	434	both	2.37e-05	0.32
chr1	136131253	136131541	288	both	2.37e-05	0.33
chr7	45370636	45370842	206	both	2.37e-05	0.33
chr10	128695921	128696725	804	both	2.38e-05	0.33
chr3	95015444	95016488	1044	both	2.38e-05	0.33
chr19	44284164	44284496	332	both	2.38e-05	0.33
chr17	15826616	15826785	169	both	2.38e-05	0.33
chrX	93632116	93632403	287	both	2.39e-05	0.33
chr8	22805591	22805931	340	both	2.39e-05	0.33
chr9	59656034	59656716	682	both	2.4e-05	0.33
chr7	126396717	126397161	444	both	2.4e-05	0.33
chr15	78913692	78914063	371	both	2.4e-05	0.33
chr5	110286145	110286534	389	both	2.43e-05	0.33
chr1	93511869	93512296	427	both	2.43e-05	0.33
chr4	46489152	46489491	339	both	2.44e-05	0.33
chr3	36572016	36572448	432	both	2.46e-05	0.34
chr8	120113869	120114246	377	both	2.47e-05	0.34
chr14	51984648	51984825	177	both	2.48e-05	0.34
chr18	7626772	7627247	475	both	2.48e-05	0.34
chr8	119840399	119840813	414	both	2.49e-05	0.34
chr7	19308259	19308841	582	both	2.5e-05	0.34
chr8	83332405	83332749	344	both	2.5e-05	0.34
chr3	116006838	116007671	833	both	2.52e-05	0.35
chr9	108507851	108508205	354	both	2.52e-05	0.35
chr2	153741108	153741724	616	both	2.54e-05	0.35
chrX	101332509	101333033	524	both	2.54e-05	0.35
chr5	137684620	137685102	482	both	2.54e-05	0.35
chr16	16146593	16147063	470	both	2.55e-05	0.35
chrX	152336622	152336985	363	both	2.56e-05	0.35
chr8	60890222	60890584	362	both	2.56e-05	0.35
chr9	44113475	44113866	391	both	2.57e-05	0.35
chr15	82338837	82339135	298	both	2.57e-05	0.35
chr4	45530757	45531432	675	both	2.58e-05	0.35
chr2	32847218	32847519	301	both	2.59e-05	0.35
chr19	5875192	5875510	318	both	2.59e-05	0.36
chr9	50739418	50739667	249	both	2.6e-05	0.36
chr4	120825165	120825995	830	both	2.6e-05	0.36
chr11	62613852	62614037	185	both	2.61e-05	0.36
chr2	27539930	27540569	639	both	2.61e-05	0.36
chrX	162829370	162829796	426	both	2.61e-05	0.36
chr6	95718732	95719021	289	both	2.62e-05	0.36
chr15	76351072	76351907	835	both	2.62e-05	0.36
chr14	27428689	27429511	822	both	2.64e-05	0.36
chr18	34651424	34651989	565	both	2.64e-05	0.36
chr14	121797738	121798733	995	both	2.65e-05	0.36
chr17	87974740	87975212	472	both	2.66e-05	0.37
chr2	156862885	156864052	1167	both	2.68e-05	0.37
chr10	80167594	80168051	457	both	2.71e-05	0.37
chr8	69270969	69271200	231	both	2.71e-05	0.37
chr4	72200977	72201221	244	both	2.72e-05	0.37
chr17	28486116	28486458	342	both	2.74e-05	0.38
chr19	43524531	43524904	373	both	2.75e-05	0.38
chr10	53596622	53597040	418	both	2.77e-05	0.38
chr8	104591227	104591662	435	both	2.78e-05	0.38
chr15	36282959	36283443	484	both	2.78e-05	0.38
chr17	63500405	63500719	314	both	2.8e-05	0.38
chr2	180119025	180119502	477	both	2.81e-05	0.38
chr15	79690399	79690969	570	both	2.81e-05	0.38
chr10	81014912	81015241	329	both	2.81e-05	0.38
chr7	105399996	105400583	587	both	2.82e-05	0.39
chr13	54503620	54503981	361	both	2.83e-05	0.39
chr17	74395460	74395759	299	both	2.84e-05	0.39
chrX	36874185	36874557	372	both	2.85e-05	0.39
chr11	90002807	90003122	315	both	2.85e-05	0.39
chr18	76241172	76242049	877	both	2.87e-05	0.39
chr3	41082956	41083588	632	both	2.9e-05	0.4
chr5	115845057	115845370	313	both	2.91e-05	0.4
chr13	45389508	45389944	436	both	2.93e-05	0.4
chr2	132815995	132816362	367	both	2.93e-05	0.4
chr5	109923335	109923806	471	both	2.97e-05	0.41
chr5	122900207	122900614	407	both	2.98e-05	0.41
chr10	85128010	85128297	287	both	3.02e-05	0.41
chr5	124628939	124629215	276	both	3.02e-05	0.41
chr4	149166579	149166974	395	both	3.05e-05	0.42
chr8	94183270	94183552	282	both	3.11e-05	0.43
chr7	80883166	80883479	313	both	3.12e-05	0.43
chr4	134853336	134854215	879	both	3.12e-05	0.43
chr9	124425589	124425771	182	both	3.13e-05	0.43
chr11	106613026	106613350	324	both	3.14e-05	0.43
chrX	73914913	73915331	418	both	3.14e-05	0.43
chr5	104571556	104571823	267	both	3.18e-05	0.44
chr19	42090187	42090583	396	both	3.2e-05	0.44
chr17	34959226	34959472	246	both	3.21e-05	0.44
chr11	80183799	80184066	267	both	3.21e-05	0.44
chr7	98655772	98657049	1277	both	3.21e-05	0.44
chr17	30612458	30612874	416	both	3.22e-05	0.44
chr18	82475065	82475337	272	both	3.24e-05	0.44
chr17	56325640	56326178	538	both	3.25e-05	0.44
chr7	75848182	75848502	320	both	3.26e-05	0.45
chr5	114690996	114691312	316	both	3.27e-05	0.45
chr4	130107455	130107720	265	both	3.28e-05	0.45
chr4	44012497	44012871	374	both	3.31e-05	0.45
chr16	18811613	18812465	852	both	3.32e-05	0.46
chr15	38300674	38301247	573	both	3.33e-05	0.46
chr2	29935302	29935609	307	both	3.35e-05	0.46
chr7	92669862	92670398	536	both	3.38e-05	0.46
chr18	38250173	38250736	563	both	3.39e-05	0.46
chr6	87042438	87043027	589	both	3.39e-05	0.46
chr10	57486180	57486479	299	both	3.4e-05	0.47
chr8	26015291	26015818	527	both	3.46e-05	0.47
chr5	20882072	20882617	545	both	3.46e-05	0.47
chr17	35516826	35517266	440	both	3.49e-05	0.48
chr1	131910269	131910640	371	both	3.49e-05	0.48
chr2	164804838	164805310	472	both	3.49e-05	0.48
chr2	34904919	34905508	589	both	3.49e-05	0.48
chr14	45219329	45219809	480	both	3.5e-05	0.48
chr1	177441808	177442338	530	both	3.51e-05	0.48
chr10	121364963	121365313	350	both	3.51e-05	0.48
chr11	120489445	120489643	198	both	3.52e-05	0.48
chr10	123076337	123076703	366	both	3.52e-05	0.48
chr17	46890474	46890834	360	both	3.52e-05	0.48
chr11	58847042	58847327	285	both	3.52e-05	0.48
chr13	13590180	13590543	363	both	3.52e-05	0.48
chr7	27486772	27487196	424	both	3.52e-05	0.48
chr17	49428273	49428578	305	both	3.54e-05	0.48
chr5	137628685	137629297	612	both	3.54e-05	0.49
chr6	29347907	29348279	372	both	3.55e-05	0.49
chr7	120982264	120982640	376	both	3.55e-05	0.49
chr13	41016168	41016473	305	both	3.58e-05	0.49
chr11	101095367	101095720	353	both	3.58e-05	0.49
chr14	55721896	55722466	570	both	3.58e-05	0.49
chr8	120475634	120475911	277	both	3.59e-05	0.49
chr4	133545881	133546282	401	both	3.6e-05	0.49
chr10	80115363	80115978	615	both	3.6e-05	0.49
chr3	69126920	69127405	485	both	3.62e-05	0.5
chr10	85102335	85102905	570	both	3.63e-05	0.5
chr7	27553028	27553415	387	both	3.65e-05	0.5
chr19	4928214	4928589	375	both	3.65e-05	0.5
chr17	34603679	34604466	787	both	3.65e-05	0.5
chr17	56472970	56473222	252	both	3.66e-05	0.5
chr9	64022945	64023325	380	both	3.68e-05	0.5
chr4	134468263	134469287	1024	both	3.68e-05	0.5
chr7	30322307	30322641	334	both	3.7e-05	0.51
chr4	33247596	33248848	1252	both	3.7e-05	0.51
chr8	125569867	125570180	313	both	3.72e-05	0.51
chr17	33909171	33909595	424	both	3.73e-05	0.51
chr18	82855760	82855933	173	both	3.74e-05	0.51
chr7	79659938	79660364	426	both	3.75e-05	0.51
chr11	65807042	65807457	415	both	3.77e-05	0.52
chr11	103412649	103412971	322	both	3.78e-05	0.52
chr17	17294182	17294519	337	both	3.79e-05	0.52
chr11	97435002	97436251	1249	both	3.79e-05	0.52
chr6	29694065	29694331	266	both	3.8e-05	0.52
chr16	5013463	5013865	402	both	3.81e-05	0.52
chr10	44529466	44529732	266	both	3.82e-05	0.52
chr5	138619599	138620003	404	both	3.85e-05	0.53
chr19	46761235	46761784	549	both	3.85e-05	0.53
chr18	56925428	56925892	464	both	3.86e-05	0.53
chr16	90220563	90220892	329	both	3.86e-05	0.53
chr2	60383282	60383603	321	both	3.89e-05	0.53
chr3	95042515	95042864	349	both	3.9e-05	0.53
chr5	100572248	100572387	139	both	3.92e-05	0.54
chr7	28766397	28766914	517	both	3.95e-05	0.54
chr10	30842796	30843131	335	both	3.97e-05	0.54
chr11	100738141	100738581	440	both	3.97e-05	0.54
chr10	130542015	130542479	464	both	3.99e-05	0.55
chr19	24280206	24281243	1037	both	4.01e-05	0.55
chr19	55741634	55741874	240	both	4.02e-05	0.55
chr17	24454760	24455586	826	both	4.03e-05	0.55
chr7	19345015	19345574	559	both	4.04e-05	0.55
chr11	32533130	32533437	307	both	4.04e-05	0.55
chr2	154603595	154604097	502	both	4.04e-05	0.55
chr11	120727241	120727579	338	both	4.05e-05	0.55
chr2	155381709	155382362	653	both	4.06e-05	0.56
chr8	70760844	70761364	520	both	4.1e-05	0.56
chr1	143776962	143777454	492	both	4.1e-05	0.56
chr5	34761516	34761948	432	both	4.1e-05	0.56
chr7	141193985	141194336	351	both	4.11e-05	0.56
chr11	115187276	115187636	360	both	4.11e-05	0.56
chr4	42949704	42950052	348	both	4.11e-05	0.56
chr2	180710010	180710368	358	both	4.11e-05	0.56
chr2	168590298	168590564	266	both	4.12e-05	0.56
chr12	83921830	83922291	461	both	4.13e-05	0.57
chr12	69227884	69228342	458	both	4.13e-05	0.57
chr17	3314254	3314489	235	both	4.18e-05	0.57
chr12	111813863	111814387	524	both	4.2e-05	0.58
chr2	118745575	118745874	299	both	4.26e-05	0.58
chr2	168080599	168081010	411	both	4.27e-05	0.58
chr19	6084759	6085834	1075	both	4.29e-05	0.59
chr17	83350755	83351068	313	both	4.3e-05	0.59
chr4	120287786	120288073	287	both	4.34e-05	0.6
chr13	112463962	112464289	327	both	4.34e-05	0.6
chr1	92180267	92180833	566	both	4.37e-05	0.6
chr4	132075233	132075680	447	both	4.37e-05	0.6
chr8	70754464	70754857	393	both	4.38e-05	0.6
chr13	75707207	75707723	516	both	4.4e-05	0.6
chr6	24664857	24665323	466	both	4.42e-05	0.61
chr11	120598337	120598792	455	both	4.42e-05	0.61
chr9	121857577	121858189	612	both	4.44e-05	0.61
chr2	32694034	32694495	461	both	4.45e-05	0.61
chr9	42264219	42264540	321	both	4.46e-05	0.61
chr8	84270289	84270735	446	both	4.49e-05	0.62
chr4	108833568	108833913	345	both	4.5e-05	0.62
chr3	144570183	144570593	410	both	4.55e-05	0.62
chr15	78982712	78983162	450	both	4.55e-05	0.62
chr1	165763629	165764003	374	both	4.57e-05	0.63
chr9	21509859	21510690	831	both	4.61e-05	0.63
chr1	180813478	180814176	698	both	4.64e-05	0.64
chr17	34931111	34931466	355	both	4.64e-05	0.64
chr11	71019240	71019809	569	both	4.64e-05	0.64
chr17	83666712	83666912	200	both	4.66e-05	0.64
chr7	3644699	3645418	719	both	4.67e-05	0.64
chr11	5261637	5261913	276	both	4.67e-05	0.64
chr12	20921141	20921411	270	both	4.68e-05	0.64
chr13	84222136	84222469	333	both	4.69e-05	0.64
chr12	64917667	64918001	334	both	4.71e-05	0.65
chr2	167661633	167661936	303	both	4.77e-05	0.65
chr17	74489402	74489926	524	both	4.77e-05	0.65
chr7	6155693	6156411	718	both	4.78e-05	0.66
chr3	100489118	100489622	504	both	4.8e-05	0.66
chr17	34972134	34972475	341	both	4.81e-05	0.66
chr11	75486618	75486975	357	both	4.83e-05	0.66
chr7	66079479	66079866	387	both	4.84e-05	0.66
chr12	103532255	103532463	208	both	4.85e-05	0.66
chr7	141338818	141339097	279	both	4.85e-05	0.66
chr11	46436862	46437243	381	both	4.86e-05	0.67
chr13	58128538	58129143	605	both	4.94e-05	0.68
chr7	141475173	141475592	419	both	4.96e-05	0.68
chr1	59763287	59763520	233	both	4.96e-05	0.68
chr9	32695848	32696231	383	both	4.98e-05	0.68
chr11	23633597	23633931	334	both	4.98e-05	0.68
chr8	25016791	25017417	626	both	4.98e-05	0.68
chr19	45058354	45058781	427	both	4.99e-05	0.68
chr5	110094398	110094843	445	both	5.01e-05	0.69
chr10	81432982	81433302	320	both	5.01e-05	0.69
chr7	139978690	139978890	200	both	5.02e-05	0.69
chr4	138250192	138250440	248	both	5.02e-05	0.69
chr6	86669177	86669735	558	both	5.03e-05	0.69
chr13	108158534	108158888	354	both	5.03e-05	0.69
chr10	80398884	80399974	1090	both	5.05e-05	0.69
chr5	24100470	24100759	289	both	5.06e-05	0.69
chr1	37541045	37541333	288	both	5.06e-05	0.69
chr16	14163135	14163383	248	both	5.08e-05	0.7
chr19	46039561	46039869	308	both	5.12e-05	0.7
chr9	109931478	109931991	513	both	5.13e-05	0.7
chr14	67008448	67009184	736	both	5.15e-05	0.71
chr11	60913681	60914040	359	both	5.15e-05	0.71
chr7	113207190	113207597	407	both	5.17e-05	0.71
chr4	126556863	126557131	268	both	5.17e-05	0.71
chr8	88696713	88697190	477	both	5.18e-05	0.71
chr13	64153184	64153772	588	both	5.18e-05	0.71
chr6	29916925	29917196	271	both	5.24e-05	0.72
chr17	56303254	56304457	1203	both	5.24e-05	0.72
chr13	74009262	74009609	347	both	5.28e-05	0.72
chr1	91413141	91413581	440	both	5.29e-05	0.72
chr2	25180595	25180882	287	both	5.29e-05	0.72
chr11	116852467	116853879	1412	both	5.31e-05	0.73
chr7	41499436	41499710	274	both	5.35e-05	0.73
chr10	80053363	80053808	445	both	5.35e-05	0.73
chr15	94589781	94590129	348	both	5.36e-05	0.73
chr16	32516453	32516693	240	both	5.36e-05	0.73
chr3	157925134	157925327	193	both	5.38e-05	0.74
chr8	128685445	128686263	818	both	5.39e-05	0.74
chr12	4082578	4083105	527	both	5.4e-05	0.74
chr8	71725661	71725904	243	both	5.4e-05	0.74
chr18	76929928	76930197	269	both	5.46e-05	0.75
chr7	12780681	12780810	129	both	5.55e-05	0.76
chr16	36828201	36828662	461	both	5.58e-05	0.76
chr12	59011733	59012353	620	both	5.59e-05	0.77
chr5	33018577	33018966	389	both	5.6e-05	0.77
chr6	134792701	134792859	158	both	5.62e-05	0.77
chr10	88201062	88201319	257	both	5.63e-05	0.77
chr5	92042635	92042977	342	both	5.77e-05	0.79
chr14	87141106	87141484	378	both	5.81e-05	0.8
chr19	4096862	4097757	895	both	5.82e-05	0.8
chr11	16951118	16951555	437	both	5.86e-05	0.8
chr16	36071529	36072238	709	both	5.88e-05	0.81
chr8	109705436	109705677	241	both	5.89e-05	0.81
chr15	79062838	79063322	484	both	5.93e-05	0.81
chrX	48284673	48285778	1105	both	5.95e-05	0.82
chr2	93849899	93850088	189	both	5.98e-05	0.82
chr10	61715187	61715447	260	both	6.02e-05	0.83
chr9	14500428	14500745	317	both	6.03e-05	0.83
chr8	71488560	71488860	300	both	6.04e-05	0.83
chr11	117809663	117810879	1216	both	6.04e-05	0.83
chr1	75191951	75192307	356	both	6.12e-05	0.84
chr15	83464523	83464943	420	both	6.17e-05	0.85
chr6	50596802	50597231	429	both	6.18e-05	0.85
chr7	45510323	45510764	441	both	6.22e-05	0.85
chr10	79854208	79854802	594	both	6.22e-05	0.85
chr14	66124511	66124594	83	both	6.22e-05	0.85
chr16	14159287	14159715	428	both	6.24e-05	0.86
chr8	122294267	122294585	318	both	6.26e-05	0.86
chr8	67494755	67495004	249	both	6.27e-05	0.86
chr12	84450952	84451580	628	both	6.27e-05	0.86
chr12	111908036	111908362	326	both	6.28e-05	0.86
chr11	101171374	101171629	255	both	6.31e-05	0.86
chr10	69352878	69353198	320	both	6.33e-05	0.87
chr5	130144450	130145117	667	both	6.35e-05	0.87
chr10	59951625	59952214	589	both	6.41e-05	0.88
chr16	91484951	91485467	516	both	6.45e-05	0.88
chr13	107890048	107890625	577	both	6.47e-05	0.89
chr11	106999308	106999864	556	both	6.51e-05	0.89
chr13	92610907	92611263	356	both	6.52e-05	0.89
chr19	29367353	29367569	216	both	6.54e-05	0.9
chr7	25754783	25756326	1543	both	6.57e-05	0.9
chr19	9982471	9983175	704	both	6.58e-05	0.9
chr12	111039070	111039468	398	both	6.59e-05	0.9
chr13	47105954	47106610	656	both	6.63e-05	0.91
chr3	79628692	79629246	554	both	6.63e-05	0.91
chr10	117710082	117711027	945	both	6.65e-05	0.91
chr7	16842848	16843066	218	both	6.71e-05	0.92
chr1	82283311	82283511	200	both	6.72e-05	0.92
chr11	109611405	109612088	683	both	6.74e-05	0.92
chr7	141902354	141902756	402	both	6.75e-05	0.93
chr9	57560878	57561442	564	both	6.77e-05	0.93
chr16	42875126	42876005	879	both	6.79e-05	0.93
chr12	70347314	70347546	232	both	6.81e-05	0.93
chr19	5510497	5510895	398	both	6.82e-05	0.93
chr9	56418062	56418481	419	both	6.83e-05	0.94
chr4	42999952	43000835	883	both	6.84e-05	0.94
chr6	125191619	125192357	738	both	6.9e-05	0.95
chr4	148140128	148140685	557	both	6.92e-05	0.95
chr17	78835308	78835792	484	both	6.93e-05	0.95
chr14	31640931	31641465	534	both	6.93e-05	0.95
chr11	75769382	75769619	237	both	6.93e-05	0.95
chr5	110839708	110840147	439	both	6.95e-05	0.95
chr4	152138553	152139001	448	both	6.96e-05	0.95
chr7	46958424	46958733	309	both	7.04e-05	0.97
chr4	19574982	19575327	345	both	7.06e-05	0.97
chr4	143161890	143162545	655	both	7.09e-05	0.97
chr19	6306299	6306952	653	both	7.09e-05	0.97
chr8	4613054	4613364	310	both	7.12e-05	0.98
chr18	31634196	31635257	1061	both	7.14e-05	0.98
chr11	50236647	50237047	400	both	7.19e-05	0.99
chr5	124540544	124540940	396	both	7.19e-05	0.99
chr4	19709032	19709438	406	both	7.19e-05	0.99
chr10	80826223	80826796	573	both	7.19e-05	0.99
chr2	69205947	69206471	524	both	7.19e-05	0.99
chr1	189007796	189008044	248	both	7.24e-05	0.99
chr4	147868447	147868963	516	both	7.3e-05	1
chr8	94917567	94917788	221	both	7.34e-05	1
chr2	173659546	173659985	439	both	7.36e-05	1
chr2	104590212	104590618	406	both	7.37e-05	1
chr15	81663808	81664133	325	both	7.41e-05	1
chr16	90810428	90810738	310	both	7.45e-05	1
chr5	136908082	136908274	192	both	7.46e-05	1
chr7	28372651	28373069	418	both	7.47e-05	1
chr2	142901468	142901768	300	both	7.48e-05	1
chr18	12741190	12741797	607	both	7.48e-05	1
chr18	46311887	46312195	308	both	7.51e-05	1
chr10	41809636	41810641	1005	both	7.53e-05	1
chr10	75893115	75893526	411	both	7.55e-05	1
chr7	44986452	44986988	536	both	7.57e-05	1
chr15	58076177	58076982	805	both	7.58e-05	1
chr16	31663740	31664289	549	both	7.59e-05	1
chr11	120232743	120233043	300	both	7.61e-05	1
chr4	59548951	59549698	747	both	7.61e-05	1
chr17	12916083	12916570	487	both	7.65e-05	1
chr16	5146849	5147049	200	both	7.66e-05	1
chr1	36068170	36068518	348	both	7.72e-05	1.1
chr19	56822135	56822509	374	both	7.72e-05	1.1
chr13	81783103	81783985	882	both	7.74e-05	1.1
chr19	53599904	53600343	439	both	7.76e-05	1.1
chr5	32854181	32854562	381	both	7.82e-05	1.1
chr5	8623082	8623300	218	both	7.83e-05	1.1
chr6	72345127	72345385	258	both	7.84e-05	1.1
chr15	3995568	3996191	623	both	7.9e-05	1.1
chr2	75832043	75832587	544	both	7.91e-05	1.1
chr8	83607931	83608489	558	both	7.91e-05	1.1
chr11	22287024	22287281	257	both	7.93e-05	1.1
chr19	11965276	11965907	631	both	7.93e-05	1.1
chr14	61556634	61557181	547	both	7.94e-05	1.1
chr7	28436330	28437273	943	both	7.94e-05	1.1
chr1	153486955	153487928	973	both	7.94e-05	1.1
chr17	33915806	33916318	512	both	7.99e-05	1.1
chr19	45749569	45749769	200	both	8.02e-05	1.1
chr18	42275129	42275523	394	both	8.07e-05	1.1
chr7	127477754	127479013	1259	both	8.1e-05	1.1
chr17	72836222	72836855	633	both	8.1e-05	1.1
chr5	135186790	135187411	621	both	8.11e-05	1.1
chr1	84839336	84840023	687	both	8.12e-05	1.1
chr12	78748665	78749103	438	both	8.16e-05	1.1
chr9	108662034	108662308	274	both	8.19e-05	1.1
chr3	138489317	138489811	494	both	8.19e-05	1.1
chr10	127121117	127121413	296	both	8.2e-05	1.1
chr11	62076810	62077119	309	both	8.22e-05	1.1
chr15	76879090	76879410	320	both	8.22e-05	1.1
chr14	62837189	62837820	631	both	8.23e-05	1.1
chr5	125389161	125390160	999	both	8.25e-05	1.1
chr7	19131496	19131865	369	both	8.31e-05	1.1
chr12	87147115	87147940	825	both	8.32e-05	1.1
chr10	81464495	81464827	332	both	8.33e-05	1.1
chr17	26939403	26939942	539	both	8.34e-05	1.1
chr1	58586254	58586509	255	both	8.37e-05	1.1
chr7	139388720	139389220	500	both	8.41e-05	1.2
chr17	46646037	46646384	347	both	8.41e-05	1.2
chr15	76380269	76380694	425	both	8.41e-05	1.2
chr16	22439608	22440021	413	both	8.41e-05	1.2
chr17	87107234	87107615	381	both	8.42e-05	1.2
chr6	134829971	134830459	488	both	8.43e-05	1.2
chr7	119895704	119896332	628	both	8.46e-05	1.2
chr11	96943792	96944299	507	both	8.47e-05	1.2
chr17	74527915	74528619	704	both	8.5e-05	1.2
chr8	45999833	46000307	474	both	8.51e-05	1.2
chr7	84689746	84690280	534	both	8.56e-05	1.2
chr6	71632798	71633689	891	both	8.62e-05	1.2
chr7	48880995	48881796	801	both	8.63e-05	1.2
chr14	118937642	118938113	471	both	8.65e-05	1.2
chr11	121388173	121388600	427	both	8.7e-05	1.2
chr9	65460823	65461126	303	both	8.7e-05	1.2
chrX	155262355	155262689	334	both	8.72e-05	1.2
chr5	123973493	123973845	352	both	8.74e-05	1.2
chr11	115536170	115536645	475	both	8.74e-05	1.2
chrX	7648736	7649258	522	both	8.74e-05	1.2
chr16	96082550	96082981	431	both	8.76e-05	1.2
chr11	103017018	103017335	317	both	8.79e-05	1.2
chr8	83442320	83442813	493	both	8.79e-05	1.2
chr19	10018104	10018428	324	both	8.81e-05	1.2
chr5	21645591	21646209	618	both	8.83e-05	1.2
chr8	22476572	22476995	423	both	8.85e-05	1.2
chr9	103365691	103366196	505	both	8.89e-05	1.2
chr19	40513667	40514064	397	both	8.9e-05	1.2
chr7	38227921	38228254	333	both	8.91e-05	1.2
chr8	25976633	25976980	347	both	8.93e-05	1.2
chr10	13192841	13193411	570	both	8.93e-05	1.2
chr12	98901232	98901718	486	both	8.94e-05	1.2
chr2	3474915	3475291	376	both	8.94e-05	1.2
chrX	53369765	53370771	1006	both	8.94e-05	1.2
chr13	55444925	55445432	507	both	8.97e-05	1.2
chrX	152001771	152002047	276	both	8.98e-05	1.2
chr5	33657645	33658670	1025	both	8.99e-05	1.2
chr5	114567334	114567554	220	both	9.02e-05	1.2
chr9	21091890	21092303	413	both	9.04e-05	1.2
chr1	66700716	66701050	334	both	9.08e-05	1.2
chr17	35164845	35165564	719	both	9.08e-05	1.2
chr16	70313948	70314622	674	both	9.14e-05	1.3
chr1	191990124	191990381	257	both	9.17e-05	1.3
chr10	59616641	59616966	325	both	9.17e-05	1.3
chr9	107985282	107986135	853	both	9.21e-05	1.3
chr15	43477002	43477376	374	both	9.25e-05	1.3
chr10	127324642	127324870	228	both	9.26e-05	1.3
chr15	59648149	59648837	688	both	9.27e-05	1.3
chr3	105801277	105801613	336	both	9.27e-05	1.3
chr8	71570291	71570817	526	both	9.29e-05	1.3
chr3	131564497	131565000	503	both	9.29e-05	1.3
chr11	102097107	102097307	200	both	9.3e-05	1.3
chr19	5366287	5366910	623	both	9.3e-05	1.3
chr2	128127382	128127729	347	both	9.34e-05	1.3
chr4	129189539	129190059	520	both	9.34e-05	1.3
chr15	5244179	5244855	676	both	9.35e-05	1.3
chr1	127773857	127774373	516	both	9.41e-05	1.3
chr17	56935480	56935857	377	both	9.42e-05	1.3
chr1	105990232	105990711	479	both	9.44e-05	1.3
chr3	98339907	98340066	159	both	9.46e-05	1.3
chr17	26972976	26973356	380	both	9.48e-05	1.3
chr11	120151230	120151604	374	both	9.49e-05	1.3
chr6	113326605	113327125	520	both	9.52e-05	1.3
chr4	131873393	131873746	353	both	9.53e-05	1.3
chr4	48124846	48125097	251	both	9.58e-05	1.3
chr11	100939361	100939927	566	both	9.59e-05	1.3
chr2	131909789	131910126	337	both	9.66e-05	1.3
chr1	9700302	9700840	538	both	9.69e-05	1.3
chr3	107333048	107334200	1152	both	9.72e-05	1.3
chr2	32727463	32727740	277	both	9.75e-05	1.3
chr13	100786480	100786900	420	both	9.76e-05	1.3
chr10	72654689	72655060	371	both	9.79e-05	1.3
chr2	131233882	131234233	351	both	9.81e-05	1.3
chr8	84066394	84067529	1135	both	9.81e-05	1.3
chr13	21787211	21787696	485	both	9.88e-05	1.4
chr17	72918154	72918846	692	both	9.91e-05	1.4
chr11	103132800	103133380	580	both	9.96e-05	1.4
chr11	54860526	54860971	445	both	9.96e-05	1.4
chr9	54950635	54950991	356	both	9.97e-05	1.4
chr6	127453521	127453974	453	both	0.000101	1.4
chr17	34644726	34644926	200	both	0.000101	1.4
chr7	127026973	127027688	715	both	0.000101	1.4
chr10	89443695	89444122	427	both	0.000101	1.4
chr10	76345329	76345584	255	both	0.000101	1.4
chr5	63968713	63969207	494	both	0.000102	1.4
chr9	13826945	13827913	968	both	0.000102	1.4
chr2	172345324	172345777	453	both	0.000102	1.4
chr17	87446721	87447397	676	both	0.000102	1.4
chr11	3648983	3649423	440	both	0.000103	1.4
chr1	164458381	164458596	215	both	0.000103	1.4
chr7	80860820	80861101	281	both	0.000103	1.4
chr17	55891918	55892226	308	both	0.000104	1.4
chr7	25133234	25133453	219	both	0.000104	1.4
chr14	122983167	122983584	417	both	0.000104	1.4
chr11	115813709	115814949	1240	both	0.000104	1.4
chr13	64312499	64312984	485	both	0.000104	1.4
chr11	59472464	59472709	245	both	0.000104	1.4
chr7	118705477	118705964	487	both	0.000105	1.4
chr18	77767676	77768025	349	both	0.000105	1.4
chr17	47521669	47521968	299	both	0.000105	1.4
chr1	80340597	80341227	630	both	0.000105	1.4
chr3	36000401	36000870	469	both	0.000105	1.4
chr5	138622755	138623017	262	both	0.000105	1.4
chr2	151009211	151009515	304	both	0.000105	1.4
chr6	116264114	116264382	268	both	0.000105	1.4
chr7	67645136	67645565	429	both	0.000106	1.5
chr2	129198498	129198926	428	both	0.000106	1.5
chr17	48409016	48410204	1188	both	0.000106	1.5
chr5	25759895	25760119	224	both	0.000106	1.5
chr5	140704469	140705172	703	both	0.000107	1.5
chr1	65178268	65179385	1117	both	0.000107	1.5
chr7	127208605	127209424	819	both	0.000107	1.5
chr1	156718610	156719326	716	both	0.000107	1.5
chr11	100397739	100398113	374	both	0.000107	1.5
chr2	174472912	174473327	415	both	0.000108	1.5
chr5	121220118	121220383	265	both	0.000108	1.5
chr19	44266963	44267312	349	both	0.000109	1.5
chr8	25847733	25848608	875	both	0.000109	1.5
chr19	3325477	3325677	200	both	0.000109	1.5
chr11	73199025	73199654	629	both	0.000109	1.5
chr10	117845920	117846378	458	both	0.000109	1.5
chr3	57735734	57736403	669	both	0.000109	1.5
chr10	67979417	67979821	404	both	0.00011	1.5
chrX	102119169	102119573	404	both	0.00011	1.5
chr4	134287212	134288054	842	both	0.00011	1.5
chr8	123373530	123374562	1032	both	0.00011	1.5
chr1	51478237	51478744	507	both	0.00011	1.5
chr8	121585418	121585825	407	both	0.00011	1.5
chr4	41464820	41465301	481	both	0.00011	1.5
chr2	3423952	3424304	352	both	0.00011	1.5
chr9	54560190	54560472	282	both	0.00011	1.5
chr8	22185514	22186021	507	both	0.000111	1.5
chrX	106186848	106187287	439	both	0.000111	1.5
chr17	26561394	26561625	231	both	0.000111	1.5
chr7	45434321	45435006	685	both	0.000111	1.5
chr3	63976008	63976342	334	both	0.000111	1.5
chr1	191575527	191576246	719	both	0.000111	1.5
chr17	12960344	12960948	604	both	0.000111	1.5
chr19	8897929	8898274	345	both	0.000112	1.5
chr15	102296116	102296428	312	both	0.000112	1.5
chr14	31128892	31129249	357	both	0.000112	1.5
chr18	69344352	69344638	286	both	0.000113	1.5
chr17	24533712	24533969	257	both	0.000113	1.5
chr4	123917248	123917623	375	both	0.000113	1.5
chr12	55491923	55492827	904	both	0.000113	1.5
chr2	105904431	105904790	359	both	0.000113	1.6
chr4	109201938	109202485	547	both	0.000114	1.6
chr1	165236857	165237256	399	both	0.000114	1.6
chr11	102946729	102946959	230	both	0.000114	1.6
chr2	150136615	150136920	305	both	0.000114	1.6
chr1	159232007	159232430	423	both	0.000115	1.6
chr15	59314790	59315248	458	both	0.000115	1.6
chr11	75348276	75348646	370	both	0.000115	1.6
chr5	115348950	115349244	294	both	0.000116	1.6
chr11	121236692	121237419	727	both	0.000116	1.6
chr6	83317158	83317811	653	both	0.000116	1.6
chr10	127063268	127063718	450	both	0.000116	1.6
chr19	44248166	44248549	383	both	0.000116	1.6
chr5	142551111	142551415	304	both	0.000116	1.6
chr3	10351253	10351649	396	both	0.000118	1.6
chr15	102136108	102136560	452	both	0.000118	1.6
chr1	43827788	43828175	387	both	0.000118	1.6
chr19	61265424	61266853	1429	both	0.000118	1.6
chr4	132732433	132732792	359	both	0.000118	1.6
chr11	116335420	116335634	214	both	0.000118	1.6
chr10	128270362	128270700	338	both	0.000119	1.6
chr12	76255089	76255511	422	both	0.000119	1.6
chr4	116464264	116464903	639	both	0.000119	1.6
chr9	97110780	97111385	605	both	0.00012	1.6
chr9	121710183	121710545	362	both	0.00012	1.6
chr11	106216280	106217152	872	both	0.00012	1.6
chr8	72160839	72161464	625	both	0.00012	1.6
chr6	119848102	119848608	506	both	0.00012	1.6
chr1	155099204	155099913	709	both	0.00012	1.7
chr10	41887257	41887666	409	both	0.00012	1.7
chr5	97111560	97111994	434	both	0.000121	1.7
chr1	36547166	36547561	395	both	0.000121	1.7
chr3	145923989	145924485	496	both	0.000121	1.7
chr5	134932264	134932521	257	both	0.000121	1.7
chr7	12977782	12978431	649	both	0.000121	1.7
chr9	64253531	64253976	445	both	0.000121	1.7
chr2	32137913	32138345	432	both	0.000122	1.7
chr10	81167697	81168114	417	both	0.000122	1.7
chrX	160994654	160994990	336	both	0.000123	1.7
chr4	139192504	139192999	495	both	0.000123	1.7
chr10	18234957	18235459	502	both	0.000123	1.7
chr4	134187024	134187520	496	both	0.000123	1.7
chr15	76246606	76246996	390	both	0.000124	1.7
chr11	68939747	68940016	269	both	0.000124	1.7
chr11	78550705	78551051	346	both	0.000124	1.7
chr16	94526433	94527158	725	both	0.000124	1.7
chr3	7503360	7503627	267	both	0.000124	1.7
chr5	3647891	3648226	335	both	0.000124	1.7
chr3	130709369	130709891	522	both	0.000125	1.7
chr15	37007324	37007736	412	both	0.000125	1.7
chr7	110061331	110061856	525	both	0.000125	1.7
chr5	122158078	122158508	430	both	0.000126	1.7
chr17	28952326	28952768	442	both	0.000126	1.7
chr9	21936824	21937142	318	both	0.000126	1.7
chr10	67285228	67285639	411	both	0.000126	1.7
chr9	21309326	21309524	198	both	0.000127	1.7
chr11	111065902	111066241	339	both	0.000127	1.7
chr9	64811027	64811612	585	both	0.000127	1.7
chr7	126428740	126429520	780	both	0.000127	1.7
chr3	108591169	108591558	389	both	0.000127	1.7
chr19	7241004	7241383	379	both	0.000128	1.7
chr2	34372657	34373001	344	both	0.000128	1.8
chr7	127244264	127244738	474	both	0.000128	1.8
chr6	100214747	100214942	195	both	0.000128	1.8
chr13	62760675	62760924	249	both	0.000128	1.8
chr2	37703331	37703700	369	both	0.000129	1.8
chr8	71468989	71469367	378	both	0.000129	1.8
chr10	77864515	77864661	146	both	0.000129	1.8
chr9	44799262	44799466	204	both	0.000129	1.8
chr5	129583864	129584315	451	both	0.000129	1.8
chr17	28313297	28313685	388	both	0.000129	1.8
chr14	66199956	66200205	249	both	0.000129	1.8
chr16	18836530	18836791	261	both	0.00013	1.8
chr2	121413541	121414100	559	both	0.000131	1.8
chr15	82898932	82899965	1033	both	0.000131	1.8
chr4	116123678	116123989	311	both	0.000132	1.8
chr8	123949244	123949620	376	both	0.000133	1.8
chr3	69044707	69045183	476	both	0.000133	1.8
chr3	36150929	36151254	325	both	0.000134	1.8
chr9	67840284	67840551	267	both	0.000134	1.8
chr2	24949568	24949929	361	both	0.000135	1.8
chr8	54529544	54530304	760	both	0.000135	1.8
chr2	127831860	127832121	261	both	0.000135	1.9
chr2	30464040	30464329	289	both	0.000135	1.9
chr5	139200405	139200845	440	both	0.000136	1.9
chr14	122534149	122534508	359	both	0.000137	1.9
chr10	61680094	61680438	344	both	0.000137	1.9
chr17	32389229	32389688	459	both	0.000138	1.9
chr14	52103972	52104608	636	both	0.000138	1.9
chr1	185329195	185329512	317	both	0.000138	1.9
chr18	61211462	61211882	420	both	0.000139	1.9
chr13	3537695	3538254	559	both	0.000139	1.9
chr11	77685927	77686372	445	both	0.00014	1.9
chr10	80539026	80539482	456	both	0.00014	1.9
chr7	45568197	45568528	331	both	0.00014	1.9
chr18	40219311	40219691	380	both	0.00014	1.9
chr16	18289241	18289634	393	both	0.000141	1.9
chr14	8172904	8173407	503	both	0.000141	1.9
chr4	9668941	9669469	528	both	0.000141	1.9
chr3	90292858	90293318	460	both	0.000141	1.9
chrX	93832053	93832341	288	both	0.000142	1.9
chr9	21424627	21425140	513	both	0.000142	1.9
chr6	82774324	82774772	448	both	0.000142	1.9
chr11	78165569	78165774	205	both	0.000143	2
chr12	108792721	108793184	463	both	0.000143	2
chr2	109280609	109280977	368	both	0.000143	2
chr7	4510009	4510230	221	both	0.000143	2
chr1	93803752	93804482	730	both	0.000143	2
chr2	30545200	30545334	134	both	0.000144	2
chr1	170174889	170175341	452	both	0.000144	2
chr15	76368795	76369033	238	both	0.000144	2
chr9	21149817	21150129	312	both	0.000144	2
chrX	56609711	56609932	221	both	0.000145	2
chr19	6276554	6277068	514	both	0.000145	2
chr11	87987137	87987805	668	both	0.000146	2
chr7	12949494	12949926	432	both	0.000146	2
chr4	128962487	128962701	214	both	0.000147	2
chr9	22225609	22226156	547	both	0.000147	2
chr4	127021117	127022518	1401	both	0.000147	2
chr6	125095888	125096389	501	both	0.000147	2
chr8	119862084	119862442	358	both	0.000147	2
chr11	115628121	115628526	405	both	0.000147	2
chr11	70562355	70563005	650	both	0.000147	2
chrX	75084894	75085113	219	both	0.000148	2
chr4	95967045	95967375	330	both	0.000148	2
chr8	95080725	95081324	599	both	0.000148	2
chr7	16048224	16048548	324	both	0.000149	2
chr15	73645669	73646039	370	both	0.000149	2
chr12	4817368	4817699	331	both	0.00015	2.1
chr12	72085460	72085976	516	both	0.00015	2.1
chrX	73082497	73082675	178	both	0.00015	2.1
chr14	46760339	46760758	419	both	0.00015	2.1
chr12	40445782	40446205	423	both	0.00015	2.1
chr16	75592802	75593063	261	both	0.000151	2.1
chr4	95052050	95052639	589	both	0.000152	2.1
chr7	92874233	92875404	1171	both	0.000152	2.1
chr2	5012725	5013039	314	both	0.000153	2.1
chr10	85185003	85185606	603	both	0.000153	2.1
chr18	36744463	36744859	396	both	0.000154	2.1
chr2	71389061	71389416	355	both	0.000155	2.1
chr10	81037123	81037580	457	both	0.000155	2.1
chr2	164460795	164461212	417	both	0.000155	2.1
chr11	58960015	58960346	331	both	0.000155	2.1
chr4	118179635	118180333	698	both	0.000156	2.1
chr7	28392650	28393129	479	both	0.000156	2.1
chr5	115300866	115301366	500	both	0.000157	2.1
chr11	121421236	121421588	352	both	0.000157	2.2
chr7	141435290	141435506	216	both	0.000157	2.2
chr19	6363342	6364063	721	both	0.000157	2.2
chr9	66059988	66060382	394	both	0.000157	2.2
chr10	118141582	118142012	430	both	0.000157	2.2
chr13	6547950	6548345	395	both	0.000157	2.2
chr1	39535569	39535948	379	both	0.000158	2.2
chr4	125066545	125066848	303	both	0.000158	2.2
chr19	53903145	53903525	380	both	0.000158	2.2
chr2	90661526	90661796	270	both	0.000158	2.2
chr5	123906988	123907406	418	both	0.000158	2.2
chr7	89338572	89339003	431	both	0.000159	2.2
chr19	4169408	4169846	438	both	0.000159	2.2
chr10	59221786	59222082	296	both	0.000159	2.2
chr11	118476773	118477150	377	both	0.000159	2.2
chr1	128102715	128103473	758	both	0.000159	2.2
chr10	40348748	40349562	814	both	0.00016	2.2
chr7	102250162	102251058	896	both	0.00016	2.2
chr1	64690619	64691084	465	both	0.00016	2.2
chr12	69183816	69184371	555	both	0.000161	2.2
chr11	119040904	119041369	465	both	0.000161	2.2
chr2	130664196	130664824	628	both	0.000161	2.2
chr9	21291148	21291667	519	both	0.000161	2.2
chr10	81545130	81545604	474	both	0.000162	2.2
chr7	45896670	45897185	515	both	0.000162	2.2
chr2	119594211	119594473	262	both	0.000163	2.2
chr2	158146426	158146645	219	both	0.000163	2.2
chr7	97579455	97579975	520	both	0.000164	2.2
chr4	3574648	3575061	413	both	0.000164	2.2
chr2	148672448	148672785	337	both	0.000164	2.2
chr7	30563174	30563781	607	both	0.000165	2.3
chr16	52453024	52453431	407	both	0.000167	2.3
chr6	136470930	136471200	270	both	0.000167	2.3
chr10	80172903	80173320	417	both	0.000167	2.3
chr2	37443141	37443463	322	both	0.000167	2.3
chr7	25267463	25268509	1046	both	0.000168	2.3
chr14	47189203	47189642	439	both	0.000168	2.3
chr14	26970494	26970823	329	both	0.000169	2.3
chr3	122924111	122924548	437	both	0.00017	2.3
chr7	27447637	27448180	543	both	0.00017	2.3
chr12	52503613	52504011	398	both	0.00017	2.3
chr19	18670609	18670988	379	both	0.00017	2.3
chr1	66816942	66817887	945	both	0.000171	2.3
chr3	137918421	137918717	296	both	0.000171	2.3
chr7	30280015	30280683	668	both	0.000171	2.3
chr11	119942788	119943237	449	both	0.000172	2.4
chr13	55100189	55100389	200	both	0.000172	2.4
chr1	67038863	67039063	200	both	0.000172	2.4
chr8	84249657	84249927	270	both	0.000172	2.4
chr8	124793364	124793572	208	both	0.000173	2.4
chr4	143412650	143412944	294	both	0.000174	2.4
chr13	17694846	17695464	618	both	0.000175	2.4
chr10	61695350	61695733	383	both	0.000175	2.4
chr17	28232526	28232883	357	both	0.000175	2.4
chr12	21111606	21111855	249	both	0.000175	2.4
chr14	21682995	21683159	164	both	0.000176	2.4
chr7	16294896	16295793	897	both	0.000176	2.4
chr11	115163099	115163520	421	both	0.000177	2.4
chr1	75141725	75143185	1460	both	0.000177	2.4
chr9	31211737	31212160	423	both	0.000178	2.4
chr10	81233030	81233310	280	both	0.000178	2.4
chr8	86623883	86624273	390	both	0.000179	2.5
chr19	53314116	53314489	373	both	0.000179	2.5
chr4	132768090	132768431	341	both	0.000179	2.5
chr4	107066793	107067147	354	both	0.00018	2.5
chrX	38634858	38635464	606	both	0.00018	2.5
chr15	83100072	83100425	353	both	0.00018	2.5
chr7	19149230	19149957	727	both	0.00018	2.5
chr5	36464826	36465319	493	both	0.000181	2.5
chr4	46536103	46536423	320	both	0.000181	2.5
chr1	183369528	183369882	354	both	0.000181	2.5
chr11	87591776	87592400	624	both	0.000182	2.5
chr7	141414040	141414537	497	both	0.000182	2.5
chr4	129335114	129336099	985	both	0.000182	2.5
chr1	118458976	118459740	764	both	0.000183	2.5
chr17	94834757	94835010	253	both	0.000183	2.5
chr17	29549637	29549950	313	both	0.000183	2.5
chr7	4964428	4964634	206	both	0.000184	2.5
chr11	61266845	61267552	707	both	0.000184	2.5
chrX	36645199	36645654	455	both	0.000184	2.5
chr7	19715400	19716108	708	both	0.000185	2.5
chr9	44320211	44320574	363	both	0.000185	2.5
chr12	99883414	99884786	1372	both	0.000185	2.5
chr14	120910795	120911327	532	both	0.000186	2.5
chr7	25680638	25681256	618	both	0.000186	2.5
chr3	127896168	127896633	465	both	0.000186	2.6
chr11	54437960	54438343	383	both	0.000187	2.6
chr19	29647914	29648612	698	both	0.000187	2.6
chr5	123394431	123394941	510	both	0.000187	2.6
chr3	95819369	95819957	588	both	0.000188	2.6
chr16	16983256	16983593	337	both	0.000189	2.6
chr3	79287201	79287576	375	both	0.000189	2.6
chr9	86571755	86572105	350	both	0.000189	2.6
chr7	30698854	30698910	56	both	0.000189	2.6
chr5	123749445	123749807	362	both	0.000189	2.6
chr2	26237339	26237672	333	both	0.000189	2.6
chr4	127243664	127243977	313	both	0.000189	2.6
chr11	70844684	70844926	242	both	0.00019	2.6
chr6	29272467	29272822	355	both	0.00019	2.6
chr1	91398573	91399041	468	both	0.00019	2.6
chr9	21220595	21220851	256	both	0.000191	2.6
chr17	33718634	33719002	368	both	0.000191	2.6
chr2	164769619	164770019	400	both	0.000192	2.6
chr5	100500680	100500956	276	both	0.000192	2.6
chr7	45367061	45367689	628	both	0.000193	2.6
chrX	53269862	53269997	135	both	0.000193	2.6
chr5	115652932	115653379	447	both	0.000193	2.7
chr14	30549069	30549412	343	both	0.000194	2.7
chr17	26715467	26716637	1170	both	0.000195	2.7
chr6	59208739	59209101	362	both	0.000195	2.7
chr2	11777516	11778678	1162	both	0.000195	2.7
chr1	59912833	59913831	998	both	0.000196	2.7
chr1	15805498	15805789	291	both	0.000196	2.7
chr16	64851684	64852168	484	both	0.000197	2.7
chr11	26387225	26387677	452	both	0.000197	2.7
chrX	8096697	8097183	486	both	0.000197	2.7
chr19	12794799	12796369	1570	both	0.000199	2.7
chr11	102430350	102430604	254	both	0.000199	2.7
chr8	11557947	11558545	598	both	0.000199	2.7
chr4	141790677	141791068	391	both	0.000199	2.7
chr10	41450278	41450543	265	both	0.000199	2.7
chr2	180024615	180025121	506	both	0.000199	2.7
chr5	99978908	99979476	568	both	0.000199	2.7
chr2	166553631	166554331	700	both	0.0002	2.7
chr12	8521438	8521932	494	both	0.0002	2.7
[truncated: 788 more rows]

## Sheet: MAST_PBX4_H3K4me1
Region	Start position of subregion relative to sequnces length	Sequence of subregion of containg motif match	Start position of motif match relative to sequnces length	Motif Index	Reverse complement	P-value	Match pattern
[truncated: 11,086 more rows]

[truncated: 3 more sheets: MAST_PBX4_H3K4me1_UniqSeq, MAST_PBX4_H3K4me3, MAST_PBX4_H3K4me3_UniqSeq]
