# Supplementary material for: Role of MNX1-mediated histone modifications and PBX gene family in MNX1-induced leukemogenesis
Source: Sci Rep. 2026 Jan 19;16:2593. doi: 10.1038/s41598-026-36367-8 (PMC12820052; doi:10.1038/s41598-026-36367-8)
Supplement: Supplementary file 7 — Supplementary Material 7 [file 41598_2026_36367_MOESM7_ESM.xlsx]

## Sheet: string_interactions_short
#node1	node2	node1_string_id	node2_string_id	neighborhood_on_chromosome	gene_fusion	phylogenetic_cooccurrence	homology	coexpression	experimentally_determined_interaction	database_annotated	automated_textmining	combined_score
Aff1	Kmt2a	10090.ENSMUSP00000031256	10090.ENSMUSP00000002095	0	0	0	0	0.069	0.168	0	0.904	0.919
Aff1	Pax5	10090.ENSMUSP00000031256	10090.ENSMUSP00000014174	0	0	0	0	0.047	0	0	0.412	0.415
Aff1	Runx1	10090.ENSMUSP00000031256	10090.ENSMUSP00000023673	0	0	0	0	0.061	0.062	0	0.665	0.679
Aff1	Rara	10090.ENSMUSP00000031256	10090.ENSMUSP00000069744	0	0	0	0	0.057	0.054	0	0.408	0.425
Aff1	Hoxa10	10090.ENSMUSP00000031256	10090.ENSMUSP00000120276	0	0	0	0	0	0	0	0.49	0.489
Aff1	Hoxa7	10090.ENSMUSP00000031256	10090.ENSMUSP00000048648	0	0	0	0	0.042	0	0	0.52	0.52
Aff1	Tcf3	10090.ENSMUSP00000031256	10090.ENSMUSP00000100979	0	0	0	0	0	0.051	0	0.548	0.553
Aff1	Pbx1	10090.ENSMUSP00000031256	10090.ENSMUSP00000135516	0	0	0	0	0	0.051	0	0.657	0.661
Aff1	Etv6	10090.ENSMUSP00000031256	10090.ENSMUSP00000079818	0	0	0	0	0.063	0.05	0	0.649	0.661
Aff1	Meis1	10090.ENSMUSP00000031256	10090.ENSMUSP00000139219	0	0	0	0	0	0.069	0	0.694	0.703
Aff1	Hoxa9	10090.ENSMUSP00000031256	10090.ENSMUSP00000046939	0	0	0	0	0	0	0	0.707	0.707
Emx2	Tlx1	10090.ENSMUSP00000053361	10090.ENSMUSP00000026236	0	0	0	0.677	0	0.186	0	0.422	0.509
Emx2	Hoxa13	10090.ENSMUSP00000053361	10090.ENSMUSP00000039170	0	0	0	0	0.043	0.063	0	0.58	0.591
Emx2	Hoxa9	10090.ENSMUSP00000053361	10090.ENSMUSP00000046939	0	0	0	0.61	0.085	0.063	0	0.516	0.549
Emx2	Pax6	10090.ENSMUSP00000053361	10090.ENSMUSP00000087870	0	0	0	0.614	0.042	0.07	0	0.391	0.41
Emx2	Hoxa10	10090.ENSMUSP00000053361	10090.ENSMUSP00000120276	0	0	0	0.605	0.1	0.063	0	0.519	0.559
Emx2	Pbx1	10090.ENSMUSP00000053361	10090.ENSMUSP00000135516	0	0	0	0	0.057	0	0	0.626	0.633
Etv6	Kmt2a	10090.ENSMUSP00000079818	10090.ENSMUSP00000002095	0	0	0	0	0.046	0	0	0.668	0.67
Etv6	Pax5	10090.ENSMUSP00000079818	10090.ENSMUSP00000014174	0	0	0	0	0	0	0	0.707	0.707
Etv6	Runx1	10090.ENSMUSP00000079818	10090.ENSMUSP00000023673	0	0	0	0	0.073	0.099	0	0.929	0.936
Etv6	Tlx1	10090.ENSMUSP00000079818	10090.ENSMUSP00000026236	0	0	0	0	0	0	0	0.474	0.474
Etv6	Hoxa9	10090.ENSMUSP00000079818	10090.ENSMUSP00000046939	0	0	0	0	0.052	0.041	0	0.441	0.447
Etv6	Rara	10090.ENSMUSP00000079818	10090.ENSMUSP00000069744	0	0	0	0	0.046	0.063	0	0.453	0.468
Etv6	Meis1	10090.ENSMUSP00000079818	10090.ENSMUSP00000139219	0	0	0	0	0.043	0	0	0.41	0.411
Etv6	Gfi1	10090.ENSMUSP00000079818	10090.ENSMUSP00000135039	0	0	0	0	0.067	0.063	0	0.425	0.454
Etv6	Tcf3	10090.ENSMUSP00000079818	10090.ENSMUSP00000100979	0	0	0	0	0.044	0	0	0.5	0.501
Etv6	Mef2d	10090.ENSMUSP00000079818	10090.ENSMUSP00000103184	0	0	0	0	0.048	0	0	0.587	0.59
Etv6	Pbx1	10090.ENSMUSP00000079818	10090.ENSMUSP00000135516	0	0	0	0	0.063	0	0	0.729	0.736
Foxa1	Runx1	10090.ENSMUSP00000041118	10090.ENSMUSP00000023673	0	0	0	0	0	0	0	0.427	0.427
Foxa1	Smad4	10090.ENSMUSP00000041118	10090.ENSMUSP00000025393	0	0	0	0	0.048	0.053	0	0.545	0.554
Foxa1	Pax6	10090.ENSMUSP00000041118	10090.ENSMUSP00000087870	0	0	0	0	0.053	0	0	0.519	0.525
Foxa1	Rara	10090.ENSMUSP00000041118	10090.ENSMUSP00000069744	0	0	0	0	0	0.097	0	0.71	0.727
Foxa1	Pbx1	10090.ENSMUSP00000041118	10090.ENSMUSP00000135516	0	0	0	0	0	0.051	0	0.766	0.769
Foxc1	Hoxa5	10090.ENSMUSP00000052196	10090.ENSMUSP00000039012	0	0	0	0	0.06	0.076	0	0.506	0.533
Foxc1	Pax6	10090.ENSMUSP00000052196	10090.ENSMUSP00000087870	0	0	0	0	0.066	0.042	0	0.581	0.592
Foxc1	Pbx1	10090.ENSMUSP00000052196	10090.ENSMUSP00000135516	0	0	0	0	0.061	0.094	0	0.723	0.744
Gfi1	Pax5	10090.ENSMUSP00000135039	10090.ENSMUSP00000014174	0	0	0	0	0.095	0	0	0.397	0.431
Gfi1	Runx1	10090.ENSMUSP00000135039	10090.ENSMUSP00000023673	0	0	0	0	0.076	0.052	0	0.773	0.784
Gfi1	Hoxa9	10090.ENSMUSP00000135039	10090.ENSMUSP00000046939	0	0	0	0	0.065	0	0	0.552	0.563
Gfi1	Hoxb4	10090.ENSMUSP00000135039	10090.ENSMUSP00000048002	0	0	0	0	0	0.05	0	0.432	0.437
Gfi1	Pax6	10090.ENSMUSP00000135039	10090.ENSMUSP00000087870	0	0	0	0	0	0.063	0	0.394	0.408
Gfi1	Tcf3	10090.ENSMUSP00000135039	10090.ENSMUSP00000100979	0	0	0	0	0.048	0.146	0	0.49	0.549
Gfi1	Meis1	10090.ENSMUSP00000135039	10090.ENSMUSP00000139219	0	0	0	0	0	0.06	0	0.531	0.541
Gfi1	Pbx1	10090.ENSMUSP00000135039	10090.ENSMUSP00000135516	0	0	0	0	0	0	0	0.596	0.596
Hoxa1	Hoxa9	10090.ENSMUSP00000000964	10090.ENSMUSP00000046939	0	0	0.096	0.657	0.152	0.135	0	0.201	0.4
Hoxa1	Hoxa3	10090.ENSMUSP00000000964	10090.ENSMUSP00000110077	0	0	0	0.653	0.244	0	0	0.24	0.401
Hoxa1	Hoxb2	10090.ENSMUSP00000000964	10090.ENSMUSP00000098092	0	0	0	0.648	0.282	0.066	0	0.226	0.435
Hoxa1	Pbx2	10090.ENSMUSP00000000964	10090.ENSMUSP00000040464	0	0	0	0	0	0.273	0	0.301	0.47
Hoxa1	Meis2	10090.ENSMUSP00000000964	10090.ENSMUSP00000028639	0	0	0	0	0.066	0.082	0	0.561	0.591
Hoxa1	Hoxa2	10090.ENSMUSP00000000964	10090.ENSMUSP00000014848	0	0	0	0.644	0.47	0.066	0	0.259	0.601
Hoxa1	Pbx1	10090.ENSMUSP00000000964	10090.ENSMUSP00000135516	0	0	0	0	0	0.48	0	0.747	0.863
Hoxa10	Hoxc8	10090.ENSMUSP00000120276	10090.ENSMUSP00000001703	0	0	0	0.719	0.246	0.135	0	0.238	0.46
Hoxa10	Hoxc9	10090.ENSMUSP00000120276	10090.ENSMUSP00000001706	0	0	0	0.801	0.354	0	0	0.153	0.429
Hoxa10	Kmt2a	10090.ENSMUSP00000120276	10090.ENSMUSP00000002095	0	0	0	0	0	0.095	0	0.448	0.479
Hoxa10	Hoxa2	10090.ENSMUSP00000120276	10090.ENSMUSP00000014848	0	0	0	0.612	0.169	0.392	0	0.261	0.595
Hoxa10	Runx1	10090.ENSMUSP00000120276	10090.ENSMUSP00000023673	0	0	0	0	0.05	0	0	0.469	0.474
Hoxa10	Hoxb5	10090.ENSMUSP00000120276	10090.ENSMUSP00000035423	0	0	0	0.703	0.298	0.135	0	0.222	0.487
Hoxa10	Hoxa5	10090.ENSMUSP00000120276	10090.ENSMUSP00000039012	0	0	0	0.7	0.133	0.392	0	0.272	0.583
Hoxa10	Hoxa13	10090.ENSMUSP00000120276	10090.ENSMUSP00000039170	0	0	0	0.603	0.321	0	0	0.505	0.649
Hoxa10	Hoxb7	10090.ENSMUSP00000120276	10090.ENSMUSP00000040121	0	0	0	0.74	0.163	0.135	0	0.295	0.445
Hoxa10	Pbx2	10090.ENSMUSP00000120276	10090.ENSMUSP00000040464	0	0	0	0	0	0.37	0	0.656	0.774
Hoxa10	Hoxa9	10090.ENSMUSP00000120276	10090.ENSMUSP00000046939	0	0	0	0.777	0.913	0	0	0.281	0.935
Hoxa10	Hoxa7	10090.ENSMUSP00000120276	10090.ENSMUSP00000048648	0	0	0	0.723	0.536	0.135	0	0.258	0.676
Hoxa10	Hoxb8	10090.ENSMUSP00000120276	10090.ENSMUSP00000052496	0	0	0	0.723	0.192	0.135	0	0.254	0.433
Hoxa10	Hoxd3	10090.ENSMUSP00000120276	10090.ENSMUSP00000107614	0	0	0	0.607	0.18	0.135	0	0.234	0.409
Hoxa10	Hoxa3	10090.ENSMUSP00000120276	10090.ENSMUSP00000110077	0	0	0	0.605	0.326	0.135	0	0.288	0.549
Hoxa10	Pbx1	10090.ENSMUSP00000120276	10090.ENSMUSP00000135516	0	0	0	0	0.047	0.282	0	0.551	0.666
Hoxa10	Meis1	10090.ENSMUSP00000120276	10090.ENSMUSP00000139219	0	0	0	0	0.042	0.28	0	0.717	0.788
Hoxa13	Hoxa2	10090.ENSMUSP00000039170	10090.ENSMUSP00000014848	0	0	0.108	0.594	0.045	0.135	0	0.291	0.408
Hoxa13	Meis2	10090.ENSMUSP00000039170	10090.ENSMUSP00000028639	0	0	0	0	0	0.28	0	0.553	0.664
Hoxa13	Pbx2	10090.ENSMUSP00000039170	10090.ENSMUSP00000040464	0	0	0	0	0	0.278	0	0.238	0.426
Hoxa13	Hoxa3	10090.ENSMUSP00000039170	10090.ENSMUSP00000110077	0	0	0	0.588	0.042	0.135	0	0.435	0.491
Hoxa13	Hoxa7	10090.ENSMUSP00000039170	10090.ENSMUSP00000048648	0	0	0	0.635	0.064	0.135	0	0.465	0.529
Hoxa13	Pbx1	10090.ENSMUSP00000039170	10090.ENSMUSP00000135516	0	0	0	0	0	0.278	0	0.44	0.578
Hoxa13	Meis1	10090.ENSMUSP00000039170	10090.ENSMUSP00000139219	0	0	0	0	0	0.508	0	0.58	0.784
Hoxa2	Hoxb7	10090.ENSMUSP00000014848	10090.ENSMUSP00000040121	0	0	0	0.757	0.18	0.066	0	0.298	0.415
Hoxa2	Pknox1	10090.ENSMUSP00000014848	10090.ENSMUSP00000094966	0	0	0	0	0.051	0.082	0	0.395	0.426
Hoxa2	Hoxc4	10090.ENSMUSP00000014848	10090.ENSMUSP00000097740	0	0	0	0.709	0.227	0.069	0	0.275	0.434
Hoxa2	Hoxa9	10090.ENSMUSP00000014848	10090.ENSMUSP00000046939	0	0	0	0.67	0.216	0.135	0	0.238	0.438
Hoxa2	Pbx2	10090.ENSMUSP00000014848	10090.ENSMUSP00000040464	0	0	0	0	0	0.258	0	0.289	0.45
Hoxa2	Meis2	10090.ENSMUSP00000014848	10090.ENSMUSP00000028639	0	0	0	0	0.063	0.082	0	0.412	0.45
Hoxa2	Hoxb6	10090.ENSMUSP00000014848	10090.ENSMUSP00000133281	0	0	0	0.736	0.373	0.069	0	0.169	0.473
Hoxa2	Hoxd3	10090.ENSMUSP00000014848	10090.ENSMUSP00000107614	0	0	0.098	0.687	0.389	0	0	0.172	0.504
Hoxa2	Hoxb8	10090.ENSMUSP00000014848	10090.ENSMUSP00000052496	0	0	0.086	0.711	0.387	0.064	0	0.221	0.537
Hoxa2	Hoxb2	10090.ENSMUSP00000014848	10090.ENSMUSP00000098092	0	0	0.078	0.912	0.514	0	0	0.103	0.563
Hoxa2	Meis1	10090.ENSMUSP00000014848	10090.ENSMUSP00000139219	0	0	0	0	0.106	0.262	0	0.422	0.586
Hoxa2	Hoxb4	10090.ENSMUSP00000014848	10090.ENSMUSP00000048002	0	0	0	0.71	0.322	0.317	0	0.251	0.623
Hoxa2	Hoxb5	10090.ENSMUSP00000014848	10090.ENSMUSP00000035423	0	0	0.121	0.709	0.524	0.222	0	0.203	0.706
Hoxa2	Pbx1	10090.ENSMUSP00000014848	10090.ENSMUSP00000135516	0	0	0	0	0.046	0.258	0	0.633	0.718
Hoxa2	Hoxa3	10090.ENSMUSP00000014848	10090.ENSMUSP00000110077	0	0	0	0.694	0.82	0	0	0.255	0.86
Hoxa2	Hoxa5	10090.ENSMUSP00000014848	10090.ENSMUSP00000039012	0	0	0.13	0.723	0.617	0.607	0	0.21	0.882
Hoxa3	Hoxb9	10090.ENSMUSP00000110077	10090.ENSMUSP00000000010	0	0	0	0.707	0.248	0.135	0	0.204	0.437
Hoxa3	Hoxc9	10090.ENSMUSP00000110077	10090.ENSMUSP00000001706	0	0	0	0.696	0.14	0.135	0	0.297	0.431
Hoxa3	Hoxb5	10090.ENSMUSP00000110077	10090.ENSMUSP00000035423	0	0	0	0.765	0.471	0	0	0.201	0.559
Hoxa3	Hoxa5	10090.ENSMUSP00000110077	10090.ENSMUSP00000039012	0	0	0	0.749	0.859	0	0	0.21	0.884
Hoxa3	Hoxb7	10090.ENSMUSP00000110077	10090.ENSMUSP00000040121	0	0	0	0.76	0.189	0	0	0.31	0.417
Hoxa3	Pbx2	10090.ENSMUSP00000110077	10090.ENSMUSP00000040464	0	0	0	0	0	0.258	0	0.382	0.522
Hoxa3	Hoxa9	10090.ENSMUSP00000110077	10090.ENSMUSP00000046939	0	0	0	0.685	0.376	0.135	0	0.507	0.711
Hoxa3	Hoxb4	10090.ENSMUSP00000110077	10090.ENSMUSP00000048002	0	0	0	0.779	0.341	0	0	0.28	0.505
Hoxa3	Hoxa7	10090.ENSMUSP00000110077	10090.ENSMUSP00000048648	0	0	0	0.747	0.623	0	0	0.215	0.692
Hoxa3	Hoxb8	10090.ENSMUSP00000110077	10090.ENSMUSP00000052496	0	0	0	0.707	0.409	0	0	0.248	0.536
Hoxa3	Hoxc4	10090.ENSMUSP00000110077	10090.ENSMUSP00000097740	0	0	0.089	0.724	0.481	0	0	0.246	0.612
Hoxa3	Hoxb2	10090.ENSMUSP00000110077	10090.ENSMUSP00000098092	0	0	0.099	0.695	0.366	0	0	0.23	0.522
Hoxa3	Pax1	10090.ENSMUSP00000110077	10090.ENSMUSP00000105594	0	0	0	0	0.08	0.085	0	0.635	0.666
Hoxa3	Meis1	10090.ENSMUSP00000110077	10090.ENSMUSP00000139219	0	0	0	0	0.123	0.082	0	0.474	0.539
Hoxa3	Hoxb6	10090.ENSMUSP00000110077	10090.ENSMUSP00000133281	0	0	0	0.754	0.378	0	0	0.294	0.542
Hoxa3	Pbx1	10090.ENSMUSP00000110077	10090.ENSMUSP00000135516	0	0	0	0	0.06	0.258	0	0.476	0.602
Hoxa5	Hoxc9	10090.ENSMUSP00000039012	10090.ENSMUSP00000001706	0	0	0	0.709	0.232	0.135	0	0.245	0.455
Hoxa5	Runx1	10090.ENSMUSP00000039012	10090.ENSMUSP00000023673	0	0	0	0	0	0	0	0.444	0.444
Hoxa5	Hoxb5	10090.ENSMUSP00000039012	10090.ENSMUSP00000035423	0	0	0.061	0.954	0.686	0	0	0.073	0.703
Hoxa5	Hoxc4	10090.ENSMUSP00000039012	10090.ENSMUSP00000097740	0	0	0	0.835	0.331	0	0	0.166	0.419
Hoxa5	Pbx2	10090.ENSMUSP00000039012	10090.ENSMUSP00000040464	0	0	0	0	0	0.258	0	0.299	0.458
Hoxa5	Hoxd3	10090.ENSMUSP00000039012	10090.ENSMUSP00000107614	0	0	0	0.749	0.385	0	0	0.167	0.465
Hoxa5	Hoxa9	10090.ENSMUSP00000039012	10090.ENSMUSP00000046939	0	0	0	0.69	0.227	0.135	0	0.279	0.476
Hoxa5	Hoxb7	10090.ENSMUSP00000039012	10090.ENSMUSP00000040121	0	0	0	0.847	0.386	0	0	0.327	0.569
Hoxa5	Hoxb6	10090.ENSMUSP00000039012	10090.ENSMUSP00000133281	0	0	0	0.854	0.566	0	0	0.132	0.607
Hoxa5	Hoxb8	10090.ENSMUSP00000039012	10090.ENSMUSP00000052496	0	0	0.109	0.772	0.418	0	0	0.315	0.614
Hoxa5	Pbx1	10090.ENSMUSP00000039012	10090.ENSMUSP00000135516	0	0	0	0	0	0.375	0	0.429	0.628
Hoxa5	Hoxa7	10090.ENSMUSP00000039012	10090.ENSMUSP00000048648	0	0	0	0.837	0.593	0	0	0.156	0.641
Hoxa5	Hoxb2	10090.ENSMUSP00000039012	10090.ENSMUSP00000098092	0	0	0.096	0.703	0.568	0	0	0.193	0.658
Hoxa5	Hoxb4	10090.ENSMUSP00000039012	10090.ENSMUSP00000048002	0	0	0	0.841	0.526	0.317	0	0.231	0.729
Hoxa5	Meis1	10090.ENSMUSP00000039012	10090.ENSMUSP00000139219	0	0	0	0	0.136	0.444	0	0.588	0.785
Hoxa7	Hoxc9	10090.ENSMUSP00000048648	10090.ENSMUSP00000001706	0	0	0.096	0.733	0.396	0.135	0	0.196	0.57
Hoxa7	Kmt2a	10090.ENSMUSP00000048648	10090.ENSMUSP00000002095	0	0	0	0	0	0.168	0	0.458	0.529
Hoxa7	Runx1	10090.ENSMUSP00000048648	10090.ENSMUSP00000023673	0	0	0	0	0.044	0	0	0.408	0.41
Hoxa7	Hoxb5	10090.ENSMUSP00000048648	10090.ENSMUSP00000035423	0	0	0	0.837	0.417	0.534	0	0.138	0.745
Hoxa7	Hoxb7	10090.ENSMUSP00000048648	10090.ENSMUSP00000040121	0	0	0.059	0.95	0.313	0.766	0	0.08	0.842
Hoxa7	Pbx2	10090.ENSMUSP00000048648	10090.ENSMUSP00000040464	0	0	0	0	0	0.258	0	0.381	0.521
Hoxa7	Hoxa9	10090.ENSMUSP00000048648	10090.ENSMUSP00000046939	0	0	0	0.723	0.713	0.135	0	0.53	0.873
Hoxa7	Hoxb4	10090.ENSMUSP00000048648	10090.ENSMUSP00000048002	0	0	0.071	0.808	0.24	0.534	0	0.148	0.682
Hoxa7	Hoxb8	10090.ENSMUSP00000048648	10090.ENSMUSP00000052496	0	0	0	0.835	0.274	0	0	0.292	0.465
Hoxa7	Hoxc4	10090.ENSMUSP00000048648	10090.ENSMUSP00000097740	0	0	0	0.817	0.225	0.534	0	0.194	0.683
Hoxa7	Pbx1	10090.ENSMUSP00000048648	10090.ENSMUSP00000135516	0	0	0	0	0	0.258	0	0.652	0.731
Hoxa7	Hoxb6	10090.ENSMUSP00000048648	10090.ENSMUSP00000133281	0	0	0.072	0.848	0.397	0.534	0	0.127	0.742
Hoxa7	Meis1	10090.ENSMUSP00000048648	10090.ENSMUSP00000139219	0	0	0	0	0.066	0.082	0	0.9	0.907
Hoxa9	Hoxb9	10090.ENSMUSP00000046939	10090.ENSMUSP00000000010	0	0	0	0.92	0.224	0	0	0.39	0.506
Hoxa9	Hoxc8	10090.ENSMUSP00000046939	10090.ENSMUSP00000001703	0	0	0	0.717	0.349	0.135	0	0.222	0.524
Hoxa9	Kmt2a	10090.ENSMUSP00000046939	10090.ENSMUSP00000002095	0	0	0	0	0	0.304	0	0.653	0.748
Hoxa9	Pax5	10090.ENSMUSP00000046939	10090.ENSMUSP00000014174	0	0	0	0	0	0.063	0	0.573	0.582
Hoxa9	Runx1	10090.ENSMUSP00000046939	10090.ENSMUSP00000023673	0	0	0	0	0	0	0	0.699	0.699
Hoxa9	Meis2	10090.ENSMUSP00000046939	10090.ENSMUSP00000028639	0	0	0	0	0	0.338	0	0.519	0.668
Hoxa9	Hoxb5	10090.ENSMUSP00000046939	10090.ENSMUSP00000035423	0	0	0	0.689	0.297	0.135	0	0.238	0.496
Hoxa9	Hoxb7	10090.ENSMUSP00000046939	10090.ENSMUSP00000040121	0	0	0	0.733	0.175	0.135	0	0.232	0.405
Hoxa9	Pbx2	10090.ENSMUSP00000046939	10090.ENSMUSP00000040464	0	0	0	0	0	0.278	0	0.667	0.75
Hoxa9	Hoxb4	10090.ENSMUSP00000046939	10090.ENSMUSP00000048002	0	0	0	0.677	0.148	0.135	0	0.261	0.408
Hoxa9	Hoxd3	10090.ENSMUSP00000046939	10090.ENSMUSP00000107614	0	0	0	0.677	0.233	0.135	0	0.208	0.429
Hoxa9	Pknox1	10090.ENSMUSP00000046939	10090.ENSMUSP00000094966	0	0	0	0	0	0.104	0	0.4	0.44
Hoxa9	Tcf3	10090.ENSMUSP00000046939	10090.ENSMUSP00000100979	0	0	0	0	0.044	0	0	0.443	0.445
Hoxa9	Rara	10090.ENSMUSP00000046939	10090.ENSMUSP00000069744	0	0	0	0	0	0.051	0	0.463	0.468
Hoxa9	Hoxc4	10090.ENSMUSP00000046939	10090.ENSMUSP00000097740	0	0	0	0.67	0.222	0.135	0	0.293	0.483
Hoxa9	Hoxb8	10090.ENSMUSP00000046939	10090.ENSMUSP00000052496	0	0	0	0.709	0.295	0.135	0	0.26	0.509
Hoxa9	Hoxb6	10090.ENSMUSP00000046939	10090.ENSMUSP00000133281	0	0	0	0.722	0.358	0.135	0	0.211	0.524
Hoxa9	Pbx1	10090.ENSMUSP00000046939	10090.ENSMUSP00000135516	0	0	0	0	0.079	0.832	0	0.958	0.993
Hoxa9	Meis1	10090.ENSMUSP00000046939	10090.ENSMUSP00000139219	0	0	0	0	0.048	0.696	0	0.993	0.997
Hoxb1	Meis3	10090.ENSMUSP00000019117	10090.ENSMUSP00000002495	0	0	0	0	0.072	0.082	0	0.415	0.458
Hoxb1	Pknox2	10090.ENSMUSP00000019117	10090.ENSMUSP00000035806	0	0	0	0	0.051	0.082	0	0.371	0.404
Hoxb1	Meis2	10090.ENSMUSP00000019117	10090.ENSMUSP00000028639	0	0	0	0	0.053	0.082	0	0.449	0.48
Hoxb1	Pax1	10090.ENSMUSP00000019117	10090.ENSMUSP00000105594	0	0	0	0	0.064	0.085	0	0.443	0.482
Hoxb1	Hoxb2	10090.ENSMUSP00000019117	10090.ENSMUSP00000098092	0	0	0	0.69	0.112	0	0	0.484	0.522
Hoxb1	Rara	10090.ENSMUSP00000019117	10090.ENSMUSP00000069744	0	0	0	0	0.05	0.066	0.4	0.397	0.636
Hoxb1	Pbx2	10090.ENSMUSP00000019117	10090.ENSMUSP00000040464	0	0	0	0	0	0.524	0	0.379	0.692
Hoxb1	Meis1	10090.ENSMUSP00000019117	10090.ENSMUSP00000139219	0	0	0	0	0.055	0.082	0.5	0.448	0.729
Hoxb1	Pknox1	10090.ENSMUSP00000019117	10090.ENSMUSP00000094966	0	0	0	0	0.051	0.082	0.8	0.569	0.914
Hoxb1	Pbx1	10090.ENSMUSP00000019117	10090.ENSMUSP00000135516	0	0	0	0	0.047	0.632	0.8	0.789	0.983
Hoxb2	Hoxb9	10090.ENSMUSP00000098092	10090.ENSMUSP00000000010	0	0	0.11	0.688	0.222	0.135	0	0.24	0.484
Hoxb2	Meis2	10090.ENSMUSP00000098092	10090.ENSMUSP00000028639	0	0	0	0	0.079	0.082	0	0.387	0.437
Hoxb2	Hoxb5	10090.ENSMUSP00000098092	10090.ENSMUSP00000035423	0	0	0.088	0.713	0.791	0.222	0	0.253	0.874
Hoxb2	Pknox2	10090.ENSMUSP00000098092	10090.ENSMUSP00000035806	0	0	0	0	0.051	0.082	0	0.387	0.419
Hoxb2	Hoxb7	10090.ENSMUSP00000098092	10090.ENSMUSP00000040121	0	0	0	0.742	0.36	0.066	0	0.386	0.601
Hoxb2	Pbx2	10090.ENSMUSP00000098092	10090.ENSMUSP00000040464	0	0	0	0	0	0.258	0	0.329	0.481
Hoxb2	Hoxb4	10090.ENSMUSP00000098092	10090.ENSMUSP00000048002	0	0	0	0.729	0.555	0	0	0.255	0.654
Hoxb2	Hoxb8	10090.ENSMUSP00000098092	10090.ENSMUSP00000052496	0	0	0	0.694	0.605	0.064	0	0.312	0.723
Hoxb2	Pknox1	10090.ENSMUSP00000098092	10090.ENSMUSP00000094966	0	0	0	0	0.051	0.082	0	0.47	0.498
Hoxb2	Hoxc4	10090.ENSMUSP00000098092	10090.ENSMUSP00000097740	0	0	0.101	0.725	0.293	0.069	0	0.284	0.52
Hoxb2	Meis1	10090.ENSMUSP00000098092	10090.ENSMUSP00000139219	0	0	0	0	0.113	0.082	0	0.486	0.545
Hoxb2	Pbx1	10090.ENSMUSP00000098092	10090.ENSMUSP00000135516	0	0	0	0	0.053	0.258	0	0.469	0.594
Hoxb2	Hoxd3	10090.ENSMUSP00000098092	10090.ENSMUSP00000107614	0	0	0	0.699	0.546	0	0	0.174	0.608
Hoxb2	Hoxb6	10090.ENSMUSP00000098092	10090.ENSMUSP00000133281	0	0	0	0.73	0.693	0.069	0	0.226	0.759
Hoxb4	Hoxb9	10090.ENSMUSP00000048002	10090.ENSMUSP00000000010	0	0	0	0.679	0.261	0.135	0	0.258	0.485
Hoxb4	Hoxc9	10090.ENSMUSP00000048002	10090.ENSMUSP00000001706	0	0	0	0.678	0.154	0.135	0	0.491	0.595
Hoxb4	Runx1	10090.ENSMUSP00000048002	10090.ENSMUSP00000023673	0	0	0	0	0.06	0	0	0.503	0.513
Hoxb4	Hoxb5	10090.ENSMUSP00000048002	10090.ENSMUSP00000035423	0	0	0.071	0.83	0.665	0.534	0	0.224	0.872
Hoxb4	Hoxb7	10090.ENSMUSP00000048002	10090.ENSMUSP00000040121	0	0	0	0.818	0.409	0.534	0	0.229	0.769
Hoxb4	Pbx2	10090.ENSMUSP00000048002	10090.ENSMUSP00000040464	0	0	0	0	0.051	0.258	0	0.316	0.476
Hoxb4	Hoxd3	10090.ENSMUSP00000048002	10090.ENSMUSP00000107614	0	0	0	0.766	0.333	0	0	0.162	0.417
Hoxb4	Hoxb8	10090.ENSMUSP00000048002	10090.ENSMUSP00000052496	0	0	0	0.741	0.393	0	0	0.198	0.493
Hoxb4	Pax6	10090.ENSMUSP00000048002	10090.ENSMUSP00000087870	0	0	0	0.616	0.068	0.345	0	0.254	0.504
Hoxb4	Pbx1	10090.ENSMUSP00000048002	10090.ENSMUSP00000135516	0	0	0	0	0.047	0.258	0	0.49	0.608
Hoxb4	Hoxc4	10090.ENSMUSP00000048002	10090.ENSMUSP00000097740	0	0	0.057	0.94	0.225	0.534	0	0.079	0.644
Hoxb4	Meis1	10090.ENSMUSP00000048002	10090.ENSMUSP00000139219	0	0	0	0	0.096	0.262	0	0.532	0.661
Hoxb4	Hoxb6	10090.ENSMUSP00000048002	10090.ENSMUSP00000133281	0	0	0	0.83	0.548	0.534	0	0.152	0.806
Hoxb5	Hoxb9	10090.ENSMUSP00000035423	10090.ENSMUSP00000000010	0	0	0	0.709	0.532	0.135	0	0.475	0.769
Hoxb5	Hoxc9	10090.ENSMUSP00000035423	10090.ENSMUSP00000001706	0	0	0	0.705	0.194	0.135	0	0.526	0.64
Hoxb5	Meis2	10090.ENSMUSP00000035423	10090.ENSMUSP00000028639	0	0	0	0	0.074	0.126	0	0.331	0.412
Hoxb5	Meis1	10090.ENSMUSP00000035423	10090.ENSMUSP00000139219	0	0	0	0	0.139	0.126	0	0.446	0.547
Hoxb5	Hoxd3	10090.ENSMUSP00000035423	10090.ENSMUSP00000107614	0	0	0	0.748	0.51	0	0	0.192	0.587
Hoxb5	Pbx2	10090.ENSMUSP00000035423	10090.ENSMUSP00000040464	0	0	0	0	0	0.633	0	0.274	0.722
Hoxb5	Pbx1	10090.ENSMUSP00000035423	10090.ENSMUSP00000135516	0	0	0	0	0.044	0.633	0	0.596	0.846
Hoxb5	Hoxb8	10090.ENSMUSP00000035423	10090.ENSMUSP00000052496	0	0	0.105	0.772	0.766	0	0	0.328	0.847
Hoxb5	Hoxc4	10090.ENSMUSP00000035423	10090.ENSMUSP00000097740	0	0	0	0.818	0.46	0.662	0	0.322	0.865
Hoxb5	Hoxb7	10090.ENSMUSP00000035423	10090.ENSMUSP00000040121	0	0	0	0.849	0.557	0.672	0	0.504	0.921
Hoxb5	Hoxb6	10090.ENSMUSP00000035423	10090.ENSMUSP00000133281	0	0	0	0.846	0.857	0.534	0	0.227	0.944
Hoxb6	Hoxb9	10090.ENSMUSP00000133281	10090.ENSMUSP00000000010	0	0	0	0.724	0.674	0.135	0	0.242	0.768
Hoxb6	Hoxc8	10090.ENSMUSP00000133281	10090.ENSMUSP00000001703	0	0	0	0.814	0.312	0.192	0	0.314	0.585
Hoxb6	Hoxc9	10090.ENSMUSP00000133281	10090.ENSMUSP00000001706	0	0	0	0.732	0.307	0.135	0	0.521	0.688
Hoxb6	Meis2	10090.ENSMUSP00000133281	10090.ENSMUSP00000028639	0	0	0	0	0.051	0.117	0	0.517	0.56
Hoxb6	Hoxb7	10090.ENSMUSP00000133281	10090.ENSMUSP00000040121	0	0	0.068	0.857	0.884	0.56	0	0.566	0.976
Hoxb6	Pbx2	10090.ENSMUSP00000133281	10090.ENSMUSP00000040464	0	0	0	0	0	0.365	0	0.361	0.577
Hoxb6	Hoxb8	10090.ENSMUSP00000133281	10090.ENSMUSP00000052496	0	0	0	0.801	0.814	0.192	0	0.37	0.897
Hoxb6	Hoxc4	10090.ENSMUSP00000133281	10090.ENSMUSP00000097740	0	0	0.073	0.82	0.455	0.568	0	0.507	0.878
Hoxb6	Hoxd3	10090.ENSMUSP00000133281	10090.ENSMUSP00000107614	0	0	0	0.765	0.568	0	0	0.173	0.627
Hoxb6	Meis1	10090.ENSMUSP00000133281	10090.ENSMUSP00000139219	0	0	0	0	0.074	0.117	0	0.606	0.65
Hoxb6	Pbx1	10090.ENSMUSP00000133281	10090.ENSMUSP00000135516	0	0	0	0	0.047	0.555	0	0.534	0.785
Hoxb7	Hoxb9	10090.ENSMUSP00000040121	10090.ENSMUSP00000000010	0	0	0	0.74	0.37	0.135	0	0.355	0.618
Hoxb7	Hoxc8	10090.ENSMUSP00000040121	10090.ENSMUSP00000001703	0	0	0	0.854	0.139	0.164	0	0.254	0.416
Hoxb7	Hoxc9	10090.ENSMUSP00000040121	10090.ENSMUSP00000001706	0	0	0	0.744	0.366	0.135	0	0.557	0.735
Hoxb7	Meis2	10090.ENSMUSP00000040121	10090.ENSMUSP00000028639	0	0	0	0	0.069	0.082	0	0.673	0.696
Hoxb7	Hoxd3	10090.ENSMUSP00000040121	10090.ENSMUSP00000107614	0	0	0	0.776	0.331	0	0	0.247	0.475
Hoxb7	Meis1	10090.ENSMUSP00000040121	10090.ENSMUSP00000139219	0	0	0	0	0.086	0.082	0	0.581	0.618
Hoxb7	Hoxc4	10090.ENSMUSP00000040121	10090.ENSMUSP00000097740	0	0	0	0.822	0.159	0.534	0	0.297	0.7
Hoxb7	Pbx1	10090.ENSMUSP00000040121	10090.ENSMUSP00000135516	0	0	0	0	0	0.302	0	0.732	0.805
Hoxb7	Pbx2	10090.ENSMUSP00000040121	10090.ENSMUSP00000040464	0	0	0	0	0	0.302	0	0.752	0.819
Hoxb7	Hoxb8	10090.ENSMUSP00000040121	10090.ENSMUSP00000052496	0	0	0	0.85	0.766	0.164	0	0.311	0.853
Hoxb8	Hoxb9	10090.ENSMUSP00000052496	10090.ENSMUSP00000000010	0	0	0	0.725	0.649	0.135	0	0.352	0.786
Hoxb8	Hoxc9	10090.ENSMUSP00000052496	10090.ENSMUSP00000001706	0	0	0	0.72	0.234	0.135	0	0.339	0.524
Hoxb8	Pbx2	10090.ENSMUSP00000052496	10090.ENSMUSP00000040464	0	0	0	0	0	0.463	0	0.194	0.549
Hoxb8	Hoxc4	10090.ENSMUSP00000052496	10090.ENSMUSP00000097740	0	0	0	0.748	0.532	0.068	0	0.283	0.66
Hoxb8	Hoxd3	10090.ENSMUSP00000052496	10090.ENSMUSP00000107614	0	0	0	0.694	0.611	0	0	0.186	0.67
Hoxb8	Meis1	10090.ENSMUSP00000052496	10090.ENSMUSP00000139219	0	0	0	0	0.062	0.478	0	0.422	0.693
Hoxb8	Pbx1	10090.ENSMUSP00000052496	10090.ENSMUSP00000135516	0	0	0	0	0.041	0.675	0	0.426	0.806
Hoxb9	Pbx2	10090.ENSMUSP00000000010	10090.ENSMUSP00000040464	0	0	0	0	0	0.278	0	0.273	0.452
Hoxb9	Hoxc4	10090.ENSMUSP00000000010	10090.ENSMUSP00000097740	0	0	0.093	0.679	0.194	0.135	0	0.242	0.457
Hoxb9	Hoxc8	10090.ENSMUSP00000000010	10090.ENSMUSP00000001703	0	0	0	0.714	0.244	0.135	0	0.274	0.484
Hoxb9	Hoxd3	10090.ENSMUSP00000000010	10090.ENSMUSP00000107614	0	0	0	0.698	0.323	0.135	0	0.2	0.491
Hoxb9	Pbx1	10090.ENSMUSP00000000010	10090.ENSMUSP00000135516	0	0	0	0	0.041	0.278	0	0.62	0.714
Hoxc4	Hoxc8	10090.ENSMUSP00000097740	10090.ENSMUSP00000001703	0	0	0	0.721	0.609	0.068	0	0.359	0.746
Hoxc4	Hoxc9	10090.ENSMUSP00000097740	10090.ENSMUSP00000001706	0	0	0	0.677	0.326	0.135	0	0.582	0.735
Hoxc4	Pax5	10090.ENSMUSP00000097740	10090.ENSMUSP00000014174	0	0	0	0	0	0.051	0	0.456	0.462
Hoxc4	Meis2	10090.ENSMUSP00000097740	10090.ENSMUSP00000028639	0	0	0	0	0.067	0.086	0	0.448	0.488
Hoxc4	Pbx2	10090.ENSMUSP00000097740	10090.ENSMUSP00000040464	0	0	0	0	0	0.384	0	0.382	0.603
Hoxc4	Hoxd3	10090.ENSMUSP00000097740	10090.ENSMUSP00000107614	0	0	0.098	0.728	0.354	0	0	0.194	0.49
Hoxc4	Meis1	10090.ENSMUSP00000097740	10090.ENSMUSP00000139219	0	0	0	0	0.076	0.086	0	0.474	0.518
Hoxc4	Pbx1	10090.ENSMUSP00000097740	10090.ENSMUSP00000135516	0	0	0	0	0	0.439	0	0.575	0.751
Hoxc8	Meis1	10090.ENSMUSP00000001703	10090.ENSMUSP00000139219	0	0	0	0	0.051	0.137	0	0.354	0.425
Hoxc8	Pbx2	10090.ENSMUSP00000001703	10090.ENSMUSP00000040464	0	0	0	0	0	0.463	0	0.203	0.553
Hoxc8	Pbx1	10090.ENSMUSP00000001703	10090.ENSMUSP00000135516	0	0	0	0	0	0.463	0	0.34	0.63
Hoxc8	Hoxc9	10090.ENSMUSP00000001703	10090.ENSMUSP00000001706	0	0	0	0.723	0.427	0.135	0	0.405	0.679
Hoxc9	Myod1	10090.ENSMUSP00000001706	10090.ENSMUSP00000072330	0	0	0	0	0.119	0.07	0	0.401	0.466
Hoxc9	Meis2	10090.ENSMUSP00000001706	10090.ENSMUSP00000028639	0	0	0	0	0.042	0.138	0	0.515	0.565
Hoxc9	Meis1	10090.ENSMUSP00000001706	10090.ENSMUSP00000139219	0	0	0	0	0	0.138	0	0.559	0.603
Hoxc9	Pbx2	10090.ENSMUSP00000001706	10090.ENSMUSP00000040464	0	0	0	0	0	0.587	0	0.397	0.74
Hoxc9	Pbx1	10090.ENSMUSP00000001706	10090.ENSMUSP00000135516	0	0	0	0	0	0.587	0	0.513	0.79
Hoxd3	Pbx1	10090.ENSMUSP00000107614	10090.ENSMUSP00000135516	0	0	0	0	0	0.258	0	0.584	0.678
Kmt2a	Mef2d	10090.ENSMUSP00000002095	10090.ENSMUSP00000103184	0	0	0	0	0.086	0	0	0.378	0.408
Kmt2a	Smarca4	10090.ENSMUSP00000002095	10090.ENSMUSP00000096547	0	0	0	0	0.091	0.074	0	0.377	0.43
Kmt2a	Tcf3	10090.ENSMUSP00000002095	10090.ENSMUSP00000100979	0	0	0	0	0.109	0.045	0	0.385	0.431
Kmt2a	Rara	10090.ENSMUSP00000002095	10090.ENSMUSP00000069744	0	0	0	0	0.104	0.06	0	0.411	0.46
Kmt2a	Pax5	10090.ENSMUSP00000002095	10090.ENSMUSP00000014174	0	0	0	0	0	0.093	0	0.472	0.501
Kmt2a	Pbx1	10090.ENSMUSP00000002095	10090.ENSMUSP00000135516	0	0	0	0	0.092	0.054	0	0.622	0.647
Kmt2a	Meis1	10090.ENSMUSP00000002095	10090.ENSMUSP00000139219	0	0	0	0	0.051	0.082	0	0.646	0.665
Kmt2a	Runx1	10090.ENSMUSP00000002095	10090.ENSMUSP00000023673	0	0	0	0	0.058	0.067	0.5	0.66	0.83
Mef2d	Myog	10090.ENSMUSP00000103184	10090.ENSMUSP00000027730	0	0	0	0	0	0.064	0.5	0.823	0.91
Mef2d	Myf6	10090.ENSMUSP00000103184	10090.ENSMUSP00000047529	0	0	0	0	0	0.064	0.5	0.611	0.802
Mef2d	Myod1	10090.ENSMUSP00000103184	10090.ENSMUSP00000072330	0	0	0	0	0	0.202	0.5	0.827	0.925
Mef2d	Tcf3	10090.ENSMUSP00000103184	10090.ENSMUSP00000100979	0	0	0	0	0.056	0	0.5	0.222	0.6
Mef2d	Pbx1	10090.ENSMUSP00000103184	10090.ENSMUSP00000135516	0	0	0	0	0	0	0	0.618	0.618
Meis1	Runx1	10090.ENSMUSP00000139219	10090.ENSMUSP00000023673	0	0	0	0	0	0	0	0.682	0.682
Meis1	Tlx1	10090.ENSMUSP00000139219	10090.ENSMUSP00000026236	0	0	0	0	0	0.239	0	0.297	0.442
Meis1	Meis2	10090.ENSMUSP00000139219	10090.ENSMUSP00000028639	0	0	0.05	0.98	0.217	0	0	0.4	0.515
Meis1	Pbx2	10090.ENSMUSP00000139219	10090.ENSMUSP00000040464	0	0	0	0.577	0.068	0.548	0	0.58	0.808
Meis1	Rara	10090.ENSMUSP00000139219	10090.ENSMUSP00000069744	0	0	0	0	0.042	0	0.4	0.445	0.653
Meis1	Pax6	10090.ENSMUSP00000139219	10090.ENSMUSP00000087870	0	0	0	0	0.051	0.099	0	0.533	0.565
Meis1	Pknox1	10090.ENSMUSP00000139219	10090.ENSMUSP00000094966	0	0	0	0.802	0.048	0.241	0.4	0.173	0.593
Meis1	Tcf3	10090.ENSMUSP00000139219	10090.ENSMUSP00000100979	0	0	0	0	0	0	0	0.511	0.511
Meis1	Pbx1	10090.ENSMUSP00000139219	10090.ENSMUSP00000135516	0	0	0	0.577	0.129	0.809	0.7	0.983	0.999
Meis2	Pax6	10090.ENSMUSP00000028639	10090.ENSMUSP00000087870	0	0	0	0	0.052	0.263	0	0.648	0.733
Meis2	Pbx2	10090.ENSMUSP00000028639	10090.ENSMUSP00000040464	0	0	0	0.578	0.068	0.59	0	0.602	0.834
Meis2	Pbx1	10090.ENSMUSP00000028639	10090.ENSMUSP00000135516	0	0	0	0.578	0.129	0.532	0	0.807	0.914
Meis3	Pbx2	10090.ENSMUSP00000002495	10090.ENSMUSP00000040464	0	0	0	0.587	0.049	0.262	0	0.379	0.526
Meis3	Pbx1	10090.ENSMUSP00000002495	10090.ENSMUSP00000135516	0	0	0	0.587	0.043	0.262	0	0.565	0.666
Myf6	Myog	10090.ENSMUSP00000047529	10090.ENSMUSP00000027730	0	0	0	0.884	0.383	0	0	0.71	0.813
Myf6	Pbx1	10090.ENSMUSP00000047529	10090.ENSMUSP00000135516	0	0	0	0	0	0.09	0	0.566	0.588
Myf6	Tcf3	10090.ENSMUSP00000047529	10090.ENSMUSP00000100979	0	0	0	0	0.047	0.279	0.5	0.423	0.775
Myf6	Myod1	10090.ENSMUSP00000047529	10090.ENSMUSP00000072330	0	0	0	0.805	0.381	0	0	0.806	0.875
Myod1	Runx1	10090.ENSMUSP00000072330	10090.ENSMUSP00000023673	0	0	0	0	0.064	0.076	0	0.377	0.414
Myod1	Smad4	10090.ENSMUSP00000072330	10090.ENSMUSP00000025393	0	0	0	0	0.047	0	0	0.403	0.407
Myod1	Myog	10090.ENSMUSP00000072330	10090.ENSMUSP00000027730	0	0	0.094	0.814	0.663	0	0	0.274	0.759
Myod1	Pax1	10090.ENSMUSP00000072330	10090.ENSMUSP00000105594	0	0	0	0	0.06	0	0	0.389	0.401
Myod1	Pax6	10090.ENSMUSP00000072330	10090.ENSMUSP00000087870	0	0	0	0	0.05	0.062	0	0.412	0.43
Myod1	Pknox1	10090.ENSMUSP00000072330	10090.ENSMUSP00000094966	0	0	0	0	0.067	0	0	0.473	0.487
Myod1	Smad2	10090.ENSMUSP00000072330	10090.ENSMUSP00000130115	0	0	0	0	0.068	0.292	0	0.482	0.628
Myod1	Pbx1	10090.ENSMUSP00000072330	10090.ENSMUSP00000135516	0	0	0	0	0	0.096	0	0.775	0.788
Myod1	Smarca4	10090.ENSMUSP00000072330	10090.ENSMUSP00000096547	0	0	0	0	0.054	0.396	0	0.89	0.931
Myod1	Tcf3	10090.ENSMUSP00000072330	10090.ENSMUSP00000100979	0	0	0	0	0.047	0.635	0.7	0.947	0.993
Myog	Smad2	10090.ENSMUSP00000027730	10090.ENSMUSP00000130115	0	0	0	0	0.047	0	0	0.46	0.463
Myog	Smarca4	10090.ENSMUSP00000027730	10090.ENSMUSP00000096547	0	0	0	0	0.075	0.317	0	0.381	0.575
Myog	Pbx1	10090.ENSMUSP00000027730	10090.ENSMUSP00000135516	0	0	0	0	0	0.09	0	0.586	0.607
Myog	Tcf3	10090.ENSMUSP00000027730	10090.ENSMUSP00000100979	0	0	0	0	0.068	0.56	0.5	0.662	0.921
Pax1	Pbx1	10090.ENSMUSP00000105594	10090.ENSMUSP00000135516	0	0	0	0	0	0.064	0	0.583	0.593
Pax5	Smarca4	10090.ENSMUSP00000014174	10090.ENSMUSP00000096547	0	0	0	0	0	0.292	0	0.292	0.478
Pax5	Pbx1	10090.ENSMUSP00000014174	10090.ENSMUSP00000135516	0	0	0	0	0	0	0	0.587	0.587
Pax5	Tcf3	10090.ENSMUSP00000014174	10090.ENSMUSP00000100979	0	0	0	0	0.061	0	0	0.802	0.807
Pax5	Runx1	10090.ENSMUSP00000014174	10090.ENSMUSP00000023673	0	0	0	0	0	0.115	0.5	0.674	0.843
Pax6	Runx1	10090.ENSMUSP00000087870	10090.ENSMUSP00000023673	0	0	0	0	0	0	0	0.548	0.548
Pax6	Smad2	10090.ENSMUSP00000087870	10090.ENSMUSP00000130115	0	0	0	0	0.049	0.082	0	0.385	0.416
Pax6	Pbx1	10090.ENSMUSP00000087870	10090.ENSMUSP00000135516	0	0	0	0	0	0.06	0	0.598	0.606
Pax6	Pknox1	10090.ENSMUSP00000087870	10090.ENSMUSP00000094966	0	0	0	0	0.055	0.093	0	0.615	0.641
Pax6	Smarca4	10090.ENSMUSP00000087870	10090.ENSMUSP00000096547	0	0	0	0	0	0.3	0	0.601	0.709
Pbx1	Prkacb	10090.ENSMUSP00000135516	10090.ENSMUSP00000005164	0	0	0	0	0.041	0	0.9	0.113	0.907
Pbx1	Prkaca	10090.ENSMUSP00000135516	10090.ENSMUSP00000005606	0	0	0	0	0	0	0.9	0.105	0.906
Pbx1	Runx1	10090.ENSMUSP00000135516	10090.ENSMUSP00000023673	0	0	0	0	0.068	0	0	0.812	0.817
Pbx1	Smad4	10090.ENSMUSP00000135516	10090.ENSMUSP00000025393	0	0	0	0	0.071	0.292	0	0.522	0.658
Pbx1	Tlx1	10090.ENSMUSP00000135516	10090.ENSMUSP00000026236	0	0	0	0	0	0.217	0	0.531	0.617
Pbx1	Pknox2	10090.ENSMUSP00000135516	10090.ENSMUSP00000035806	0	0	0	0.573	0.071	0.378	0	0.567	0.728
Pbx1	Pbx2	10090.ENSMUSP00000135516	10090.ENSMUSP00000040464	0	0	0.053	0.975	0.077	0.118	0	0.658	0.701
Pbx1	Rara	10090.ENSMUSP00000135516	10090.ENSMUSP00000069744	0	0	0	0	0.108	0.052	0.4	0.373	0.639
Pbx1	Pdx1	10090.ENSMUSP00000135516	10090.ENSMUSP00000082729	0	0	0	0	0	0.258	0	0.664	0.74
Pbx1	Pknox1	10090.ENSMUSP00000135516	10090.ENSMUSP00000094966	0	0	0	0.571	0	0.652	0.9	0.986	0.999
Pbx1	Smarca4	10090.ENSMUSP00000135516	10090.ENSMUSP00000096547	0	0	0	0	0.051	0.082	0	0.658	0.676
Pbx1	Tcf3	10090.ENSMUSP00000135516	10090.ENSMUSP00000100979	0	0	0	0	0.068	0	0	0.846	0.851
Pbx1	Smad2	10090.ENSMUSP00000135516	10090.ENSMUSP00000130115	0	0	0	0	0.09	0.292	0	0.501	0.65
Pbx2	Pknox2	10090.ENSMUSP00000040464	10090.ENSMUSP00000035806	0	0	0	0.574	0	0.307	0	0.325	0.513
Pbx2	Pknox1	10090.ENSMUSP00000040464	10090.ENSMUSP00000094966	0	0	0	0.572	0.061	0.629	0	0.664	0.873
Pdx1	Prkacb	10090.ENSMUSP00000082729	10090.ENSMUSP00000005164	0	0	0	0	0	0	0.9	0.239	0.92
Pdx1	Prkaca	10090.ENSMUSP00000082729	10090.ENSMUSP00000005606	0	0	0	0	0	0	0.9	0.241	0.92
Pdx1	Runx1	10090.ENSMUSP00000082729	10090.ENSMUSP00000023673	0	0	0	0	0	0	0	0.42	0.42
Pknox1	Smad4	10090.ENSMUSP00000094966	10090.ENSMUSP00000025393	0	0	0	0	0.053	0.318	0	0.458	0.619
Pknox1	Rara	10090.ENSMUSP00000094966	10090.ENSMUSP00000069744	0	0	0	0	0.061	0	0.4	0.09	0.443
Pknox1	Smad2	10090.ENSMUSP00000094966	10090.ENSMUSP00000130115	0	0	0	0	0.063	0.332	0	0.429	0.611
Prkaca	Prkacb	10090.ENSMUSP00000005606	10090.ENSMUSP00000005164	0	0	0.049	0.983	0.061	0	0.9	0.426	0.941
Rara	Runx1	10090.ENSMUSP00000069744	10090.ENSMUSP00000023673	0	0	0	0	0.077	0.064	0	0.841	0.85
Runx1	Smad4	10090.ENSMUSP00000023673	10090.ENSMUSP00000025393	0	0	0	0	0.052	0.103	0	0.374	0.421
Runx1	Tlx1	10090.ENSMUSP00000023673	10090.ENSMUSP00000026236	0	0	0	0	0.054	0	0	0.458	0.465
Runx1	Smarca4	10090.ENSMUSP00000023673	10090.ENSMUSP00000096547	0	0	0	0	0	0.292	0.5	0.379	0.76
Runx1	Smad2	10090.ENSMUSP00000023673	10090.ENSMUSP00000130115	0	0	0	0	0.064	0.337	0	0.713	0.807
Runx1	Tcf3	10090.ENSMUSP00000023673	10090.ENSMUSP00000100979	0	0	0	0	0.079	0.076	0.5	0.841	0.923
Smad2	Smad4	10090.ENSMUSP00000130115	10090.ENSMUSP00000025393	0	0	0	0.83	0.152	0.99	0.9	0.988	0.999
Smad2	Smarca4	10090.ENSMUSP00000130115	10090.ENSMUSP00000096547	0	0	0	0	0.044	0.168	0	0.44	0.515
Smad4	Smarca4	10090.ENSMUSP00000025393	10090.ENSMUSP00000096547	0	0	0	0	0.061	0.069	0	0.412	0.441
Smarca4	Tcf3	10090.ENSMUSP00000096547	10090.ENSMUSP00000100979	0	0	0	0	0.077	0.292	0	0.342	0.532
